# Supplementary material
Source: MDPI journal article supplement (https://www.mdpi.com/2073-4352/13/8/1254)
Supplement: s1 [file s1]

Archive with 3 entries (3 files):
- SF1_CIF of 2a.pdf
- SF2_CheckCIF of 2a.pdf
- Supporting Information.pdf
