# Supplementary material
Source: MDPI journal article supplement (https://www.mdpi.com/2073-4352/13/8/1254)
Supplement: s1 [file s1 › SF1_CIF of 2a.pdf]

data\_1

|                              |                 |
|------------------------------|-----------------|
| _audit_creation_method       | 'SHELXL-2014/7' |
| _shelx_SHELXL_version_number | '2014/7'        |
| _chemical_name_systematic    | ?               |
| _chemical_name_common        | ?               |
| _chemical_melting_point      | ?               |
| _chemical_formula_moiety     | ?               |
| _chemical_formula_sum        |                 |
| 'C18 H12 Br Cl2 N5 O'        |                 |
| _chemical_formula_weight     | 465.14          |

loop\_  
\_atom\_type\_symbol  
\_atom\_type\_description  
\_atom\_type\_scatter\_dispersion\_real  
\_atom\_type\_scatter\_dispersion\_imag  
\_atom\_type\_scatter\_source  
'C' 'C' 0.0033 0.0016  
'International Tables Vol C Tables 4.2.6.8 and 6.1.1.4'  
'H' 'H' 0.0000 0.0000  
'International Tables Vol C Tables 4.2.6.8 and 6.1.1.4'  
'N' 'N' 0.0061 0.0033  
'International Tables Vol C Tables 4.2.6.8 and 6.1.1.4'  
'O' 'O' 0.0106 0.0060  
'International Tables Vol C Tables 4.2.6.8 and 6.1.1.4'  
'Cl' 'Cl' 0.1484 0.1585  
'International Tables Vol C Tables 4.2.6.8 and 6.1.1.4'  
'Br' 'Br' -0.2901 2.4595  
'International Tables Vol C Tables 4.2.6.8 and 6.1.1.4'

|                             |            |
|-----------------------------|------------|
| _space_group_crystal_system | monoclinic |
| _space_group_IT_number      | 14         |
| _space_group_name_H-M_alt   | 'P 21/c'   |
| _space_group_name_Hall      | '-P 2ybc'  |

\_shelx\_space\_group\_comment

;  
The symmetry employed for this shelxl refinement is uniquely defined  
by the following loop, which should always be used as a source of  
symmetry information in preference to the above space-group names.  
They are only intended as comments.  
;

loop\_  
\_space\_group\_symop\_operation\_xyz  
'x, y, z'  
'-x, y+1/2, -z+1/2'  
'-x, -y, -z'  
'x, -y-1/2, z-1/2'

|                |             |
|----------------|-------------|
| _cell_length_a | 11.3279(18) |
| _cell_length_b | 15.934(3)   |

|                                            |                      |
|--------------------------------------------|----------------------|
| _cell_length_c                             | 10.6668 (17)         |
| _cell_angle_alpha                          | 90                   |
| _cell_angle_beta                           | 104.910 (2)          |
| _cell_angle_gamma                          | 90                   |
| _cell_volume                               | 1860.6 (5)           |
| _cell_formula_units_Z                      | 4                    |
| _cell_measurement_temperature              | 296 (2)              |
| _cell_measurement_reflms_used              | 7297                 |
| _cell_measurement_theta_min                | 2.26                 |
| _cell_measurement_theta_max                | 30.11                |
| _exptl_crystal_description                 | ?                    |
| _exptl_crystal_colour                      | ?                    |
| _exptl_crystal_density_meas                | ?                    |
| _exptl_crystal_density_method              | ?                    |
| _exptl_crystal_density_diffrn              | 1.661                |
| _exptl_crystal_F_000                       | 928                  |
| _exptl_transmission_factor_min             | ?                    |
| _exptl_transmission_factor_max             | ?                    |
| _exptl_crystal_size_max                    | 0.220                |
| _exptl_crystal_size_mid                    | 0.170                |
| _exptl_crystal_size_min                    | 0.140                |
| _exptl_absorpt_coefficient_mu              | 2.516                |
| _shelx_estimated_absorpt_T_min             | 0.608                |
| _shelx_estimated_absorpt_T_max             | 0.720                |
| _exptl_absorpt_correction_type             | ?                    |
| _exptl_absorpt_correction_T_min            | ?                    |
| _exptl_absorpt_correction_T_max            | ?                    |
| _exptl_absorpt_process_details             | ?                    |
| _exptl_absorpt_special_details             | ?                    |
| _diffrn_ambient_temperature                | 296 (2)              |
| _diffrn_radiation_wavelength               | 0.71073              |
| _diffrn_radiation_type                     | 'MoK\alpha'          |
| _diffrn_radiation_source                   | 'sealed tube'        |
| _diffrn_radiation_monochromator            | 'graphite'           |
| _diffrn_measurement_device_type            | 'Bruker APEX-II CCD' |
| _diffrn_measurement_method                 | '\f and \w scans'    |
| _diffrn_detector_area_resol_mean           | ?                    |
| _diffrn_reflms_number                      | 13140                |
| _diffrn_reflms_av_unetI/netI               | 0.0295               |
| _diffrn_reflms_av_R_equivalents            | 0.0328               |
| _diffrn_reflms_limit_h_min                 | -13                  |
| _diffrn_reflms_limit_h_max                 | 13                   |
| _diffrn_reflms_limit_k_min                 | -19                  |
| _diffrn_reflms_limit_k_max                 | 18                   |
| _diffrn_reflms_limit_l_min                 | -12                  |
| _diffrn_reflms_limit_l_max                 | 12                   |
| _diffrn_reflms_theta_min                   | 2.257                |
| _diffrn_reflms_theta_max                   | 25.497               |
| _diffrn_reflms_theta_full                  | 25.242               |
| _diffrn_measured_fraction_theta_max        | 0.999                |
| _diffrn_measured_fraction_theta_full       | 0.999                |
| _diffrn_reflms_Laue_measured_fraction_max  | 0.999                |
| _diffrn_reflms_Laue_measured_fraction_full | 0.999                |

```

_diffrn_reflms_point_group_measured_fraction_max    0.999
_diffrn_reflms_point_group_measured_fraction_full   0.999
_reflms_number_total                                3468
_reflms_number_gt                                    2910
_reflms_threshold_expression                         'I > 2\s(I) '
_reflms_Friedel_coverage                            0.000
_reflms_Friedel_fraction_max                        .
_reflms_Friedel_fraction_full                       .

_reflms_special_details
;
Reflections were merged by SHELXL according to the crystal
class for the calculation of statistics and refinement.

_reflms_Friedel_fraction is defined as the number of unique
Friedel pairs measured divided by the number that would be
possible theoretically, ignoring centric projections and
systematic absences.
;

_computing_data_collection                          ?
_computing_cell_refinement                          ?
_computing_data_reduction                           ?
_computing_structure_solution                       ?
_computing_structure_refinement 'SHELXL-2014/7 (Sheldrick, 2014)'
_computing_molecular_graphics                       ?
_computing_publication_material                    ?
_refine_special_details                             ?
_refine_ls_structure_factor_coef                    Fsqd
_refine_ls_matrix_type                              full
_refine_ls_weighting_scheme                         calc
_refine_ls_weighting_details
'w=1/[\s^2^(Fo^2^)+(0.0458P)^2^+0.8479P] where P=(Fo^2^+2Fc^2^)/3'
_atom_sites_solution_primary                        ?
_atom_sites_solution_secondary                      ?
_atom_sites_solution_hydrogens                     geom
_refine_ls_hydrogen_treatment                      constr
_refine_ls_extinction_method                       'SHELXL-2014/7 (Sheldrick 2014)'
_refine_ls_extinction_coef                         0.0062(7)
_refine_ls_extinction_expression
'Fc^*=kFc[1+0.001xFc^2^\l^3^/sin(2\q)]^-1/4^'
_refine_ls_number_reflms                           3468
_refine_ls_number_parameters                        247
_refine_ls_number_restraints                        0
_refine_ls_R_factor_all                             0.0425
_refine_ls_R_factor_gt                             0.0324
_refine_ls_wR_factor_ref                           0.0928
_refine_ls_wR_factor_gt                           0.0860
_refine_ls_goodness_of_fit_ref                      1.115
_refine_ls_restrained_S_all                        1.115
_refine_ls_shift/su_max                            0.001
_refine_ls_shift/su_mean                           0.000

```

loop\_

|     | _atom_site_label | _atom_site_type_symbol | _atom_site_fract_x | _atom_site_fract_y | _atom_site_fract_z | _atom_site_U_iso_or_equiv | _atom_site_adp_type | _atom_site_occupancy | _atom_site_site_symmetry_order | _atom_site_calc_flag | _atom_site_refinement_flags_posn | _atom_site_refinement_flags_adp | _atom_site_refinement_flags_occupancy | _atom_site_disorder_assembly | _atom_site_disorder_group |
|-----|------------------|------------------------|--------------------|--------------------|--------------------|---------------------------|---------------------|----------------------|--------------------------------|----------------------|----------------------------------|---------------------------------|---------------------------------------|------------------------------|---------------------------|
| C1  | C                | 0.5659(3)              | 1.09348(18)        | -0.1545(3)         | 0.0513(7)          | Uani                      | 1 1 d               | . . . . .            |                                |                      |                                  |                                 |                                       |                              |                           |
| H1A | H                | 0.6442                 | 1.1193             | -0.1464            | 0.077              | Uiso                      | 1 1 calc R U        | . . .                |                                |                      |                                  |                                 |                                       |                              |                           |
| H1B | H                | 0.5404                 | 1.1026             | -0.0765            | 0.077              | Uiso                      | 1 1 calc R U        | . . .                |                                |                      |                                  |                                 |                                       |                              |                           |
| H1C | H                | 0.5072                 | 1.1178             | -0.2267            | 0.077              | Uiso                      | 1 1 calc R U        | . . .                |                                |                      |                                  |                                 |                                       |                              |                           |
| C2  | C                | 0.5754(2)              | 1.00112(18)        | -0.1764(3)         | 0.0383(6)          | Uani                      | 1 1 d               | . . . . .            |                                |                      |                                  |                                 |                                       |                              |                           |
| C3  | C                | 0.5251(3)              | 0.96545(19)        | -0.2962(3)         | 0.0454(7)          | Uani                      | 1 1 d               | . . . . .            |                                |                      |                                  |                                 |                                       |                              |                           |
| H3  | H                | 0.4829                 | 0.9991             | -0.3643            | 0.055              | Uiso                      | 1 1 calc R U        | . . .                |                                |                      |                                  |                                 |                                       |                              |                           |
| C4  | C                | 0.5365(3)              | 0.8801(2)          | -0.3168(3)         | 0.0465(7)          | Uani                      | 1 1 d               | . . . . .            |                                |                      |                                  |                                 |                                       |                              |                           |
| C5  | C                | 0.5995(2)              | 0.82794(18)        | -0.2196(3)         | 0.0440(6)          | Uani                      | 1 1 d               | . . . . .            |                                |                      |                                  |                                 |                                       |                              |                           |
| H5  | H                | 0.6069                 | 0.7709             | -0.2345            | 0.053              | Uiso                      | 1 1 calc R U        | . . .                |                                |                      |                                  |                                 |                                       |                              |                           |
| C6  | C                | 0.6516(2)              | 0.86277(16)        | -0.0986(2)         | 0.0357(5)          | Uani                      | 1 1 d               | . . . . .            |                                |                      |                                  |                                 |                                       |                              |                           |
| C7  | C                | 0.6387(2)              | 0.94834(15)        | -0.0754(2)         | 0.0328(5)          | Uani                      | 1 1 d               | . . . . .            |                                |                      |                                  |                                 |                                       |                              |                           |
| C8  | C                | 0.7245(2)              | 0.80989(16)        | 0.0050(2)          | 0.0365(6)          | Uani                      | 1 1 d               | . . . . .            |                                |                      |                                  |                                 |                                       |                              |                           |
| C9  | C                | 0.8573(3)              | 0.80286(17)        | 0.2254(3)          | 0.0426(6)          | Uani                      | 1 1 d               | . . . . .            |                                |                      |                                  |                                 |                                       |                              |                           |
| H9A | H                | 0.9258                 | 0.8376             | 0.2657             | 0.064              | Uiso                      | 1 1 calc R U        | . . .                |                                |                      |                                  |                                 |                                       |                              |                           |
| H9B | H                | 0.8854                 | 0.7543             | 0.1883             | 0.064              | Uiso                      | 1 1 calc R U        | . . .                |                                |                      |                                  |                                 |                                       |                              |                           |
| H9C | H                | 0.8161                 | 0.7855             | 0.2893             | 0.064              | Uiso                      | 1 1 calc R U        | . . .                |                                |                      |                                  |                                 |                                       |                              |                           |
| C10 | C                | 0.7478(2)              | 0.93487(14)        | 0.1374(2)          | 0.0296(5)          | Uani                      | 1 1 d               | . . . . .            |                                |                      |                                  |                                 |                                       |                              |                           |
| C11 | C                | 0.7927(2)              | 0.97345(13)        | 0.2660(2)          | 0.0306(5)          | Uani                      | 1 1 d               | . . . . .            |                                |                      |                                  |                                 |                                       |                              |                           |
| C12 | C                | 0.7894(2)              | 0.94943(15)        | 0.3886(2)          | 0.0363(6)          | Uani                      | 1 1 d               | . . . . .            |                                |                      |                                  |                                 |                                       |                              |                           |
| H12 | H                | 0.7648                 | 0.8980             | 0.4145             | 0.044              | Uiso                      | 1 1 calc R U        | . . .                |                                |                      |                                  |                                 |                                       |                              |                           |
| C13 | C                | 0.8311(2)              | 1.01920(15)        | 0.4650(2)          | 0.0342(5)          | Uani                      | 1 1 d               | . . . . .            |                                |                      |                                  |                                 |                                       |                              |                           |
| C14 | C                | 0.8645(2)              | 1.10428(14)        | 0.1782(2)          | 0.0293(5)          | Uani                      | 1 1 d               | . . . . .            |                                |                      |                                  |                                 |                                       |                              |                           |
| C15 | C                | 0.8142(2)              | 1.18335(15)        | 0.1498(2)          | 0.0326(5)          | Uani                      | 1 1 d               | . . . . .            |                                |                      |                                  |                                 |                                       |                              |                           |
| C16 | C                | 0.8497(3)              | 1.23074(17)        | 0.0578(3)          | 0.0440(6)          | Uani                      | 1 1 d               | . . . . .            |                                |                      |                                  |                                 |                                       |                              |                           |
| H16 | H                | 0.8191                 | 1.2846             | 0.0376             | 0.053              | Uiso                      | 1 1 calc R U        | . . .                |                                |                      |                                  |                                 |                                       |                              |                           |
| C17 | C                | 0.9314(3)              | 1.1967(2)          | -0.0035(3)         | 0.0561(8)          | Uani                      | 1 1 d               | . . . . .            |                                |                      |                                  |                                 |                                       |                              |                           |
| H17 | H                | 0.9586                 | 1.2276             | -0.0645            | 0.067              | Uiso                      | 1 1 calc R U        | . . .                |                                |                      |                                  |                                 |                                       |                              |                           |
| C18 | C                | 0.9722(3)              | 1.1160(2)          | 0.0269(3)          | 0.0544(8)          | Uani                      | 1 1 d               | . . . . .            |                                |                      |                                  |                                 |                                       |                              |                           |
| H18 | H                | 1.0243                 | 1.0924             | -0.0180            | 0.065              | Uiso                      | 1 1 calc R U        | . . .                |                                |                      |                                  |                                 |                                       |                              |                           |
| C11 | Cl               | 0.46706(8)             | 0.83772(7)         | -0.46758(8)        | 0.0719(3)          | Uani                      | 1 1 d               | . . . . .            |                                |                      |                                  |                                 |                                       |                              |                           |
| C12 | Cl               | 0.70450(8)             | 1.22052(5)         | 0.22058(7)         | 0.0562(2)          | Uani                      | 1 1 d               | . . . . .            |                                |                      |                                  |                                 |                                       |                              |                           |
| N1  | N                | 0.68635(19)            | 0.98266(12)        | 0.0462(2)          | 0.0338(5)          | Uani                      | 1 1 d               | . . . . .            |                                |                      |                                  |                                 |                                       |                              |                           |
| N2  | N                | 0.77207(18)            | 0.85079(12)        | 0.12260(19)        | 0.0317(4)          | Uani                      | 1 1 d               | . . . . .            |                                |                      |                                  |                                 |                                       |                              |                           |
| N3  | N                | 0.83449(19)            | 1.05404(12)        | 0.27619(18)        | 0.0309(4)          | Uani                      | 1 1 d               | . . . . .            |                                |                      |                                  |                                 |                                       |                              |                           |
| N4  | N                | 0.86013(19)            | 1.08303(12)        | 0.40017(18)        | 0.0345(5)          | Uani                      | 1 1 d               | . . . . .            |                                |                      |                                  |                                 |                                       |                              |                           |
| N5  | N                | 0.9407(2)              | 1.07011(14)        | 0.1177(2)          | 0.0419(5)          | Uani                      | 1 1 d               | . . . . .            |                                |                      |                                  |                                 |                                       |                              |                           |
| O1  | O                | 0.7463(2)              | 0.73594(12)        | -0.0080(2)         | 0.0536(5)          | Uani                      | 1 1 d               | . . . . .            |                                |                      |                                  |                                 |                                       |                              |                           |
| Br1 | Br               | 0.84932(3)             | 1.02771(2)         | 0.64353(3)         | 0.05514(14)        | Uani                      | 1 1 d               | . . . . .            |                                |                      |                                  |                                 |                                       |                              |                           |

```

loop_
  _atom_site_aniso_label
  _atom_site_aniso_U_11
  _atom_site_aniso_U_22
  _atom_site_aniso_U_33
  _atom_site_aniso_U_23
  _atom_site_aniso_U_13
  _atom_site_aniso_U_12
C1 0.0593(18) 0.0421(16) 0.0464(16) 0.0096(13) 0.0028(14) 0.0011(13)
C2 0.0377(14) 0.0410(14) 0.0368(14) 0.0032(11) 0.0105(11) -0.0045(11)
C3 0.0393(14) 0.0588(18) 0.0357(14) 0.0027(12) 0.0051(11) -0.0019(13)
C4 0.0400(15) 0.0618(19) 0.0362(14) -0.0125(13) 0.0069(11) -0.0088(13)
C5 0.0415(15) 0.0444(15) 0.0458(15) -0.0149(12) 0.0109(12) -0.0042(12)
C6 0.0366(13) 0.0343(13) 0.0378(13) -0.0063(11) 0.0128(10) -0.0053(10)
C7 0.0356(13) 0.0336(13) 0.0303(12) -0.0014(10) 0.0104(10) -0.0051(10)
C8 0.0424(14) 0.0295(13) 0.0410(14) -0.0058(10) 0.0168(11) -0.0033(11)
C9 0.0533(16) 0.0321(13) 0.0438(15) 0.0041(11) 0.0150(12) 0.0092(12)
C10 0.0360(12) 0.0235(11) 0.0311(12) 0.0001(9) 0.0122(10) -0.0033(9)
C11 0.0403(13) 0.0195(11) 0.0320(12) 0.0026(9) 0.0095(10) 0.0013(9)
C12 0.0499(15) 0.0265(12) 0.0331(13) 0.0060(10) 0.0117(11) -0.0008(11)
C13 0.0404(14) 0.0351(14) 0.0264(12) 0.0036(10) 0.0071(10) 0.0044(11)
C14 0.0367(12) 0.0240(11) 0.0260(11) 0.0023(9) 0.0060(9) -0.0041(9)
C15 0.0379(13) 0.0270(12) 0.0315(12) -0.0001(9) 0.0065(10) -0.0013(10)
C16 0.0563(17) 0.0297(13) 0.0444(15) 0.0113(11) 0.0101(13) -0.0031(12)
C17 0.0607(19) 0.0589(19) 0.0554(18) 0.0231(15) 0.0273(15) -0.0032(15)
C18 0.0556(18) 0.064(2) 0.0533(17) 0.0103(15) 0.0305(15) 0.0080(15)
C11 0.0689(5) 0.0948(7) 0.0429(4) -0.0257(4) -0.0022(4) -0.0087(5)
C12 0.0721(5) 0.0543(4) 0.0483(4) 0.0117(3) 0.0261(4) 0.0298(4)
N1 0.0429(12) 0.0255(10) 0.0326(11) -0.0007(8) 0.0089(9) -0.0016(9)
N2 0.0387(11) 0.0228(10) 0.0342(10) -0.0007(8) 0.0106(9) 0.0002(8)
N3 0.0458(12) 0.0222(9) 0.0249(10) 0.0001(8) 0.0095(8) -0.0009(8)
N4 0.0492(12) 0.0282(10) 0.0246(10) -0.0016(8) 0.0068(9) 0.0014(9)
N5 0.0483(13) 0.0405(12) 0.0404(12) 0.0056(10) 0.0177(10) 0.0076(10)
O1 0.0763(15) 0.0278(10) 0.0568(12) -0.0120(9) 0.0173(11) 0.0061(9)
Br1 0.0792(3) 0.0595(2) 0.02596(17) 0.00426(12) 0.01210(14) -0.00150(15)

```

```
_geom_special_details
```

```
;
```

All esds (except the esd in the dihedral angle between two l.s. planes) are estimated using the full covariance matrix. The cell esds are taken into account individually in the estimation of esds in distances, angles and torsion angles; correlations between esds in cell parameters are only used when they are defined by crystal symmetry. An approximate (isotropic)

treatment of cell esds is used for estimating esds involving l.s. planes.

```
;
```

```

loop_
  _geom_bond_atom_site_label_1
  _geom_bond_atom_site_label_2
  _geom_bond_distance
  _geom_bond_site_symmetry_2
  _geom_bond_publ_flag

```

C1 C2 1.498(4) . ?  
 C2 C3 1.381(4) . ?  
 C2 C7 1.409(4) . ?  
 C3 C4 1.389(4) . ?  
 C4 C5 1.376(4) . ?  
 C4 C11 1.735(3) . ?  
 C5 C6 1.389(4) . ?  
 C6 C7 1.400(4) . ?  
 C6 C8 1.464(4) . ?  
 C7 N1 1.382(3) . ?  
 C8 O1 1.219(3) . ?  
 C8 N2 1.393(3) . ?  
 C9 N2 1.474(3) . ?  
 C10 N1 1.290(3) . ?  
 C10 N2 1.385(3) . ?  
 C10 C11 1.470(3) . ?  
 C11 N3 1.363(3) . ?  
 C11 C12 1.372(3) . ?  
 C12 C13 1.388(4) . ?  
 C13 N4 1.318(3) . ?  
 C13 Br1 1.866(2) . ?  
 C14 N5 1.321(3) . ?  
 C14 C15 1.384(3) . ?  
 C14 N3 1.425(3) . ?  
 C15 C16 1.378(4) . ?  
 C15 C12 1.717(3) . ?  
 C16 C17 1.375(4) . ?  
 C17 C18 1.376(5) . ?  
 C18 N5 1.333(4) . ?  
 N3 N4 1.360(3) . ?

loop\_  
 \_geom\_angle\_atom\_site\_label\_1  
 \_geom\_angle\_atom\_site\_label\_2  
 \_geom\_angle\_atom\_site\_label\_3  
 \_geom\_angle  
 \_geom\_angle\_site\_symmetry\_1  
 \_geom\_angle\_site\_symmetry\_3  
 \_geom\_angle\_publ\_flag  
 C3 C2 C7 118.0(3) . . ?  
 C3 C2 C1 121.3(3) . . ?  
 C7 C2 C1 120.6(2) . . ?  
 C2 C3 C4 121.1(3) . . ?  
 C5 C4 C3 121.5(2) . . ?  
 C5 C4 C11 119.1(2) . . ?  
 C3 C4 C11 119.3(2) . . ?  
 C4 C5 C6 118.2(3) . . ?  
 C5 C6 C7 121.0(3) . . ?  
 C5 C6 C8 119.6(2) . . ?  
 C7 C6 C8 119.4(2) . . ?  
 N1 C7 C6 121.2(2) . . ?  
 N1 C7 C2 118.7(2) . . ?  
 C6 C7 C2 120.1(2) . . ?  
 O1 C8 N2 120.8(2) . . ?

O1 C8 C6 124.2(2) . . ?  
 N2 C8 C6 115.0(2) . . ?  
 N1 C10 N2 124.7(2) . . ?  
 N1 C10 C11 116.6(2) . . ?  
 N2 C10 C11 118.7(2) . . ?  
 N3 C11 C12 106.3(2) . . ?  
 N3 C11 C10 119.9(2) . . ?  
 C12 C11 C10 133.2(2) . . ?  
 C11 C12 C13 104.4(2) . . ?  
 N4 C13 C12 113.7(2) . . ?  
 N4 C13 Br1 120.15(18) . . ?  
 C12 C13 Br1 126.11(19) . . ?  
 N5 C14 C15 123.5(2) . . ?  
 N5 C14 N3 115.8(2) . . ?  
 C15 C14 N3 120.7(2) . . ?  
 C16 C15 C14 118.4(2) . . ?  
 C16 C15 C12 120.1(2) . . ?  
 C14 C15 C12 121.41(19) . . ?  
 C17 C16 C15 118.6(3) . . ?  
 C16 C17 C18 118.9(3) . . ?  
 N5 C18 C17 123.2(3) . . ?  
 C10 N1 C7 118.6(2) . . ?  
 C10 N2 C8 120.9(2) . . ?  
 C10 N2 C9 121.8(2) . . ?  
 C8 N2 C9 117.1(2) . . ?  
 N4 N3 C11 112.34(18) . . ?  
 N4 N3 C14 119.39(19) . . ?  
 C11 N3 C14 127.90(19) . . ?  
 C13 N4 N3 103.23(19) . . ?  
 C14 N5 C18 117.4(2) . . ?

\_refine\_diff\_density\_max 0.544  
 \_refine\_diff\_density\_min -0.510  
 \_refine\_diff\_density\_rms 0.089

\_shelx\_res\_file  
 ;

1. res created by SHELXL-2014/7

TITL 1 in P2(1)/c  
 CELL 0.71073 11.3279 15.9343 10.6668 90.000 104.910 90.000  
 ZERR 4.00 0.0018 0.0026 0.0017 0.000 0.002 0.000  
 LATT 1  
 SYMM -X, 0.5+Y, 0.5-Z  
 SFAC C H N O Cl Br  
 UNIT 72 48 20 4 8 4  
 OMIT -3 51  
 L.S. 10  
 ACTA  
 BOND  
 FMAP 2  
 PLAN 10  
 SIZE 0.14 0.17 0.22

TEMP 23.000  
 WGHT 0.045800 0.847900  
 EXTI 0.006154  
 FVAR 0.12677  
 MOLE 1  
 C1 1 0.565937 1.093485 -0.154548 11.00000 0.05934  
 0.04215 =  
 0.04636 0.00955 0.00284 0.00112  
 AFIX 137  
 H1A 2 0.644155 1.119259 -0.146373 11.00000 -1.50000  
 H1B 2 0.540406 1.102617 -0.076511 11.00000 -1.50000  
 H1C 2 0.507213 1.117761 -0.226745 11.00000 -1.50000  
 AFIX 0  
 C2 1 0.575359 1.001115 -0.176420 11.00000 0.03767  
 0.04100 =  
 0.03680 0.00321 0.01053 -0.00448  
 C3 1 0.525117 0.965450 -0.296228 11.00000 0.03926  
 0.05882 =  
 0.03572 0.00273 0.00510 -0.00190  
 AFIX 43  
 H3 2 0.482946 0.999139 -0.364283 11.00000 -1.20000  
 AFIX 0  
 C4 1 0.536491 0.880089 -0.316842 11.00000 0.04005  
 0.06178 =  
 0.03617 -0.01254 0.00687 -0.00882  
 C5 1 0.599478 0.827942 -0.219612 11.00000 0.04154  
 0.04440 =  
 0.04576 -0.01492 0.01090 -0.00421  
 AFIX 43  
 H5 2 0.606932 0.770918 -0.234507 11.00000 -1.20000  
 AFIX 0  
 C6 1 0.651629 0.862772 -0.098610 11.00000 0.03662  
 0.03431 =  
 0.03780 -0.00632 0.01280 -0.00528  
 C7 1 0.638699 0.948339 -0.075373 11.00000 0.03557  
 0.03362 =  
 0.03028 -0.00137 0.01045 -0.00510  
 C8 1 0.724507 0.809888 0.005021 11.00000 0.04240  
 0.02947 =  
 0.04104 -0.00575 0.01677 -0.00330  
 C9 1 0.857260 0.802861 0.225431 11.00000 0.05334  
 0.03211 =  
 0.04379 0.00407 0.01504 0.00918  
 AFIX 137  
 H9A 2 0.925784 0.837589 0.265683 11.00000 -1.50000  
 H9B 2 0.885352 0.754317 0.188272 11.00000 -1.50000  
 H9C 2 0.816124 0.785461 0.289305 11.00000 -1.50000  
 AFIX 0  
 C10 1 0.747847 0.934872 0.137420 11.00000 0.03601  
 0.02355 =  
 0.03114 0.00015 0.01224 -0.00329  
 C11 1 0.792737 0.973450 0.266043 11.00000 0.04029  
 0.01950 =  
 0.03204 0.00256 0.00950 0.00133

|           |    |          |          |           |          |          |
|-----------|----|----------|----------|-----------|----------|----------|
| C12       | 1  | 0.789403 | 0.949435 | 0.388576  | 11.00000 | 0.04986  |
| 0.02648 = |    |          |          |           |          |          |
|           |    | 0.03310  | 0.00601  | 0.01167   | -0.00084 |          |
| AFIX      | 43 |          |          |           |          |          |
| H12       | 2  | 0.764783 | 0.898037 | 0.414531  | 11.00000 | -1.20000 |
| AFIX      | 0  |          |          |           |          |          |
| C13       | 1  | 0.831090 | 1.019204 | 0.465046  | 11.00000 | 0.04043  |
| 0.03506 = |    |          |          |           |          |          |
|           |    | 0.02640  | 0.00356  | 0.00710   | 0.00440  |          |
| C14       | 1  | 0.864467 | 1.104284 | 0.178229  | 11.00000 | 0.03675  |
| 0.02397 = |    |          |          |           |          |          |
|           |    | 0.02600  | 0.00232  | 0.00600   | -0.00405 |          |
| C15       | 1  | 0.814218 | 1.183352 | 0.149790  | 11.00000 | 0.03786  |
| 0.02696 = |    |          |          |           |          |          |
|           |    | 0.03150  | -0.00012 | 0.00648   | -0.00133 |          |
| C16       | 1  | 0.849700 | 1.230741 | 0.057771  | 11.00000 | 0.05627  |
| 0.02965 = |    |          |          |           |          |          |
|           |    | 0.04438  | 0.01127  | 0.01006   | -0.00311 |          |
| AFIX      | 43 |          |          |           |          |          |
| H16       | 2  | 0.819058 | 1.284598 | 0.037569  | 11.00000 | -1.20000 |
| AFIX      | 0  |          |          |           |          |          |
| C17       | 1  | 0.931386 | 1.196678 | -0.003530 | 11.00000 | 0.06071  |
| 0.05889 = |    |          |          |           |          |          |
|           |    | 0.05540  | 0.02312  | 0.02733   | -0.00322 |          |
| AFIX      | 43 |          |          |           |          |          |
| H17       | 2  | 0.958598 | 1.227622 | -0.064540 | 11.00000 | -1.20000 |
| AFIX      | 0  |          |          |           |          |          |
| C18       | 1  | 0.972224 | 1.116004 | 0.026905  | 11.00000 | 0.05559  |
| 0.06355 = |    |          |          |           |          |          |
|           |    | 0.05326  | 0.01027  | 0.03046   | 0.00801  |          |
| AFIX      | 43 |          |          |           |          |          |
| H18       | 2  | 1.024328 | 1.092372 | -0.017988 | 11.00000 | -1.20000 |
| AFIX      | 0  |          |          |           |          |          |
| CL1       | 5  | 0.467055 | 0.837716 | -0.467583 | 11.00000 | 0.06889  |
| 0.09477 = |    |          |          |           |          |          |
|           |    | 0.04290  | -0.02571 | -0.00222  | -0.00866 |          |
| CL2       | 5  | 0.704497 | 1.220523 | 0.220576  | 11.00000 | 0.07205  |
| 0.05426 = |    |          |          |           |          |          |
|           |    | 0.04829  | 0.01174  | 0.02610   | 0.02977  |          |
| N1        | 3  | 0.686348 | 0.982660 | 0.046159  | 11.00000 | 0.04286  |
| 0.02547 = |    |          |          |           |          |          |
|           |    | 0.03258  | -0.00067 | 0.00890   | -0.00160 |          |
| N2        | 3  | 0.772067 | 0.850793 | 0.122600  | 11.00000 | 0.03867  |
| 0.02279 = |    |          |          |           |          |          |
|           |    | 0.03424  | -0.00069 | 0.01057   | 0.00023  |          |
| N3        | 3  | 0.834486 | 1.054042 | 0.276188  | 11.00000 | 0.04577  |
| 0.02215 = |    |          |          |           |          |          |
|           |    | 0.02490  | 0.00007  | 0.00953   | -0.00093 |          |
| N4        | 3  | 0.860125 | 1.083027 | 0.400173  | 11.00000 | 0.04918  |
| 0.02815 = |    |          |          |           |          |          |
|           |    | 0.02462  | -0.00155 | 0.00679   | 0.00141  |          |
| N5        | 3  | 0.940669 | 1.070112 | 0.117656  | 11.00000 | 0.04828  |
| 0.04051 = |    |          |          |           |          |          |
|           |    | 0.04042  | 0.00559  | 0.01765   | 0.00760  |          |

```

O1      4      0.746336      0.735939      -0.007964      11.00000      0.07628
0.02775 =
          0.05676      -0.01202      0.01729      0.00615
BR1     6      0.849317      1.027707      0.643531      11.00000      0.07917
0.05950 =
          0.02596      0.00426      0.01210      -0.00150
HKLF 4

REM 1 in P2(1)/c
REM R1 = 0.0324 for      2910 Fo > 4sig(Fo)  and 0.0425 for all      3468
data
REM      247 parameters refined using      0 restraints

END

WGHT      0.0465      0.8356

REM Highest difference peak 0.544,  deepest hole -0.510,  1-sigma level
0.089
Q1      1      0.7733  1.0200  0.5974  11.00000  0.05      0.54
Q2      1      1.0200  1.2589 -0.0757  11.00000  0.05      0.42
Q3      1      0.6618  1.1901  0.1570  11.00000  0.05      0.38
Q4      1      0.6598  0.8369 -0.0576  11.00000  0.05      0.32
Q5      1      0.6595  0.8485 -0.1387  11.00000  0.05      0.31
Q6      1      0.6976  0.7319 -0.0418  11.00000  0.05      0.27
Q7      1      0.5847  0.9690 -0.1219  11.00000  0.05      0.27
Q8      1      0.6929  1.2240 -0.0203  11.00000  0.05      0.26
Q9      1      0.8487  1.0451  0.4433  11.00000  0.05      0.25
Q10     1      0.3959  1.0177 -0.3263  11.00000  0.05      0.25
;
_shelx_res_checksum      67160

_shelx_hkl_file
;
      0      0      2      2.36      0.12
      0      0     -2      2.28      0.09
      0      0     -3      0.11      0.04
      0      0     -3      0.18      0.04
      0      0     -4      8.56      0.32
      0      0     -4      8.59      0.32
      0      0      4      8.18      0.38
      0      0     -5     -0.04      0.06
      0      0      5      0.02      0.08
      0      0     -5      0.03      0.08
      0      0     -6     56.34      1.99
      0      0     -6     55.43      1.91
      0      0      6     55.21      2.34
      0      0     -7     -0.07      0.09
      0      0      7      0.10      0.13
      0      0     -7      0.02      0.13
      0      0     -8     46.02      1.61
      0      0      8     46.39      1.97
      0      0     -9     -0.24      0.17
      0      0      9     -0.06      0.18

```

|   |    |     |       |      |
|---|----|-----|-------|------|
| 0 | 0  | -10 | 20.30 | 0.78 |
| 0 | 0  | 10  | 21.00 | 0.95 |
| 0 | 0  | -11 | -0.28 | 0.23 |
| 0 | 0  | 11  | 0.00  | 0.26 |
| 0 | 0  | 12  | 7.22  | 0.51 |
| 0 | 0  | -12 | 7.06  | 0.46 |
| 0 | 0  | -13 | -0.10 | 0.28 |
| 0 | 0  | -14 | 4.67  | 0.48 |
| 0 | 1  | 0   | -0.02 | 0.02 |
| 0 | 1  | -1  | 6.38  | 0.23 |
| 0 | 1  | 1   | 6.86  | 0.29 |
| 0 | 1  | -1  | 7.09  | 0.24 |
| 0 | -1 | -1  | 6.51  | 0.23 |
| 0 | 1  | -2  | 19.78 | 0.81 |
| 0 | 1  | 2   | 18.35 | 0.81 |
| 0 | 1  | -2  | 17.23 | 0.69 |
| 0 | -1 | -2  | 19.41 | 0.69 |
| 0 | -1 | -2  | 18.44 | 0.66 |
| 0 | 1  | -3  | 56.64 | 2.06 |
| 0 | 1  | 3   | 58.66 | 2.41 |
| 0 | -1 | -3  | 57.63 | 1.97 |
| 0 | -1 | -3  | 58.44 | 2.06 |
| 0 | 1  | 4   | 20.77 | 0.87 |
| 0 | 1  | -4  | 20.15 | 0.73 |
| 0 | -1 | -4  | 20.26 | 0.73 |
| 0 | -1 | -4  | 19.95 | 0.71 |
| 0 | 1  | -5  | 0.04  | 0.06 |
| 0 | 1  | -5  | 0.13  | 0.08 |
| 0 | 1  | 5   | -0.02 | 0.04 |
| 0 | -1 | -5  | 0.35  | 0.08 |
| 0 | -1 | 5   | 0.12  | 0.09 |
| 0 | -1 | -5  | 0.09  | 0.07 |
| 0 | 1  | 6   | 0.20  | 0.12 |
| 0 | 1  | -6  | -0.09 | 0.07 |
| 0 | 1  | -6  | 0.02  | 0.11 |
| 0 | -1 | -6  | -0.06 | 0.07 |
| 0 | -1 | 6   | -0.04 | 0.11 |
| 0 | -1 | -6  | -0.02 | 0.09 |
| 0 | 1  | -7  | 35.73 | 1.26 |
| 0 | 1  | -7  | 35.13 | 1.30 |
| 0 | 1  | 7   | 36.66 | 1.53 |
| 0 | -1 | -7  | 35.69 | 1.25 |
| 0 | -1 | 7   | 35.96 | 1.53 |
| 0 | 1  | -8  | 7.16  | 0.36 |
| 0 | 1  | 8   | 7.15  | 0.40 |
| 0 | -1 | -8  | 7.53  | 0.36 |
| 0 | -1 | -8  | 6.99  | 0.33 |
| 0 | -1 | 8   | 6.84  | 0.41 |
| 0 | 1  | -9  | 0.13  | 0.16 |
| 0 | 1  | 9   | 0.15  | 0.19 |
| 0 | -1 | 9   | 0.03  | 0.19 |
| 0 | -1 | -9  | 0.08  | 0.17 |
| 0 | 1  | 10  | -0.07 | 0.21 |
| 0 | 1  | -10 | -0.14 | 0.20 |

|   |    |     |        |       |
|---|----|-----|--------|-------|
| 0 | -1 | 10  | -0.09  | 0.22  |
| 0 | -1 | -10 | -0.23  | 0.20  |
| 0 | 1  | 11  | 22.23  | 1.00  |
| 0 | 1  | -11 | 21.07  | 0.85  |
| 0 | -1 | -11 | 21.63  | 0.85  |
| 0 | -1 | 11  | 21.87  | 1.01  |
| 0 | 1  | -12 | 4.37   | 0.40  |
| 0 | -1 | 12  | 5.01   | 0.46  |
| 0 | -1 | -12 | 4.59   | 0.41  |
| 0 | 1  | -13 | 1.57   | 0.31  |
| 0 | -1 | -13 | 1.74   | 0.31  |
| 0 | -1 | 13  | 2.48   | 0.34  |
| 0 | 1  | -14 | -0.08  | 0.32  |
| 0 | -1 | -14 | -0.14  | 0.28  |
| 0 | 2  | 0   | 197.29 | 8.41  |
| 0 | 2  | -1  | 46.88  | 1.89  |
| 0 | 2  | -1  | 44.74  | 1.53  |
| 0 | 2  | -1  | 46.62  | 1.61  |
| 0 | 2  | 1   | 44.04  | 1.88  |
| 0 | -2 | -1  | 42.57  | 1.53  |
| 0 | 2  | -2  | 40.90  | 1.38  |
| 0 | 2  | 2   | 38.53  | 1.69  |
| 0 | 2  | -2  | 41.14  | 1.44  |
| 0 | -2 | -2  | 42.43  | 1.44  |
| 0 | -2 | -2  | 39.34  | 1.37  |
| 0 | 2  | -3  | 0.14   | 0.04  |
| 0 | 2  | -3  | 0.33   | 0.07  |
| 0 | -2 | -3  | 0.17   | 0.05  |
| 0 | -2 | -3  | 0.20   | 0.05  |
| 0 | 2  | -4  | 408.20 | 14.99 |
| 0 | 2  | 4   | 434.62 | 17.61 |
| 0 | -2 | -4  | 436.49 | 15.03 |
| 0 | -2 | -4  | 408.76 | 14.34 |
| 0 | 2  | -5  | 87.82  | 3.04  |
| 0 | -2 | -5  | 89.84  | 2.91  |
| 0 | -2 | -5  | 71.52  | 3.04  |
| 0 | -2 | 5   | 92.73  | 3.58  |
| 0 | 2  | 6   | 15.45  | 0.68  |
| 0 | 2  | -6  | 14.16  | 0.56  |
| 0 | -2 | 6   | 15.46  | 0.69  |
| 0 | -2 | -6  | 15.82  | 0.56  |
| 0 | 2  | -7  | 10.34  | 0.44  |
| 0 | 2  | 7   | 12.04  | 0.54  |
| 0 | -2 | -7  | 11.92  | 0.45  |
| 0 | -2 | -7  | 11.67  | 0.46  |
| 0 | -2 | 7   | 12.11  | 0.56  |
| 0 | 2  | 8   | 8.26   | 0.43  |
| 0 | -2 | 8   | 7.76   | 0.44  |
| 0 | -2 | -8  | 7.64   | 0.36  |
| 0 | -2 | -8  | 7.64   | 0.35  |
| 0 | 2  | -9  | 8.18   | 0.39  |
| 0 | 2  | 9   | 8.57   | 0.45  |
| 0 | -2 | -9  | 7.98   | 0.39  |
| 0 | -2 | 9   | 8.14   | 0.48  |

|   |    |     |        |       |
|---|----|-----|--------|-------|
| 0 | 2  | -10 | 27.75  | 1.04  |
| 0 | 2  | 10  | 29.51  | 1.26  |
| 0 | -2 | 10  | 27.68  | 1.26  |
| 0 | -2 | -10 | 28.44  | 1.04  |
| 0 | 2  | -11 | 6.24   | 0.41  |
| 0 | -2 | -11 | 6.02   | 0.41  |
| 0 | -2 | 11  | 6.00   | 0.48  |
| 0 | 2  | -12 | 0.34   | 0.24  |
| 0 | -2 | 12  | 0.56   | 0.29  |
| 0 | -2 | -12 | 0.33   | 0.23  |
| 0 | 2  | -13 | 3.21   | 0.35  |
| 0 | -2 | -13 | 3.49   | 0.35  |
| 0 | -2 | 13  | 4.46   | 0.52  |
| 0 | 2  | -14 | 1.61   | 0.35  |
| 0 | -2 | -14 | 1.37   | 0.34  |
| 0 | 3  | 0   | 0.09   | 0.03  |
| 0 | 3  | 1   | 140.93 | 6.12  |
| 0 | 3  | -1  | 151.86 | 6.16  |
| 0 | 3  | -1  | 146.32 | 5.01  |
| 0 | 3  | -1  | 152.51 | 5.24  |
| 0 | -3 | -1  | 143.23 | 5.00  |
| 0 | 3  | -2  | 1.66   | 0.12  |
| 0 | 3  | -2  | 1.74   | 0.08  |
| 0 | 3  | -2  | 1.62   | 0.10  |
| 0 | -3 | -2  | 1.45   | 0.09  |
| 0 | 3  | 3   | 326.41 | 14.00 |
| 0 | 3  | -3  | 338.63 | 11.93 |
| 0 | -3 | -3  | 320.70 | 11.41 |
| 0 | -3 | -3  | 357.30 | 11.97 |
| 0 | 3  | 4   | 3.89   | 0.21  |
| 0 | 3  | -4  | 4.41   | 0.17  |
| 0 | 3  | -4  | 4.26   | 0.24  |
| 0 | 3  | -4  | 3.70   | 0.18  |
| 0 | -3 | -4  | 4.34   | 0.19  |
| 0 | 3  | -5  | 0.19   | 0.10  |
| 0 | 3  | 5   | 0.14   | 0.09  |
| 0 | -3 | -5  | 0.16   | 0.06  |
| 0 | -3 | -5  | 0.32   | 0.09  |
| 0 | -3 | 5   | 0.21   | 0.10  |
| 0 | 3  | -6  | 61.88  | 2.24  |
| 0 | -3 | -6  | 63.72  | 2.25  |
| 0 | -3 | 6   | 62.85  | 2.64  |
| 0 | -3 | -6  | 62.63  | 2.15  |
| 0 | 3  | 7   | 31.82  | 1.34  |
| 0 | 3  | -7  | 30.56  | 1.12  |
| 0 | -3 | -7  | 31.55  | 1.10  |
| 0 | -3 | -7  | 31.78  | 1.14  |
| 0 | -3 | 7   | 30.51  | 1.35  |
| 0 | 3  | 8   | 12.49  | 0.59  |
| 0 | -3 | -8  | 12.37  | 0.51  |
| 0 | -3 | -8  | 12.67  | 0.51  |
| 0 | -3 | 8   | 12.13  | 0.60  |
| 0 | 3  | 9   | 14.62  | 0.69  |
| 0 | 3  | -9  | 14.67  | 0.60  |

|   |    |     |        |       |
|---|----|-----|--------|-------|
| 0 | -3 | 9   | 14.25  | 0.70  |
| 0 | -3 | -9  | 14.54  | 0.59  |
| 0 | -3 | -9  | 15.09  | 0.59  |
| 0 | 3  | -10 | 0.86   | 0.20  |
| 0 | 3  | 10  | 0.99   | 0.23  |
| 0 | -3 | -10 | 0.96   | 0.22  |
| 0 | -3 | 10  | 1.01   | 0.25  |
| 0 | 3  | -11 | 21.33  | 0.84  |
| 0 | -3 | -11 | 21.08  | 0.83  |
| 0 | -3 | 11  | 21.02  | 1.00  |
| 0 | 3  | -12 | 0.61   | 0.27  |
| 0 | -3 | -12 | 0.32   | 0.24  |
| 0 | -3 | 12  | 0.64   | 0.31  |
| 0 | 3  | -13 | 11.17  | 0.57  |
| 0 | -3 | 13  | 11.78  | 0.69  |
| 0 | -3 | -13 | 10.83  | 0.59  |
| 0 | 3  | -14 | 0.09   | 0.33  |
| 0 | -3 | -14 | -0.24  | 0.31  |
| 0 | -3 | 14  | 0.17   | 0.36  |
| 0 | 4  | 0   | 240.36 | 10.03 |
| 0 | 4  | -1  | 98.69  | 3.33  |
| 0 | 4  | 1   | 98.69  | 4.08  |
| 0 | 4  | -1  | 99.60  | 4.09  |
| 0 | -4 | -1  | 93.53  | 3.33  |
| 0 | 4  | -2  | 29.63  | 1.01  |
| 0 | 4  | -2  | 30.17  | 1.24  |
| 0 | 4  | -2  | 30.25  | 1.05  |
| 0 | 4  | 2   | 29.57  | 1.23  |
| 0 | -4 | -2  | 27.58  | 1.01  |
| 0 | 4  | -3  | 10.83  | 0.38  |
| 0 | -4 | -3  | 10.03  | 0.38  |
| 0 | 4  | 4   | 2.55   | 0.17  |
| 0 | 4  | -4  | 3.10   | 0.13  |
| 0 | 4  | -4  | 2.79   | 0.16  |
| 0 | -4 | -4  | 2.79   | 0.15  |
| 0 | 4  | -5  | 27.94  | 1.00  |
| 0 | 4  | 5   | 27.21  | 1.18  |
| 0 | 4  | -5  | 27.47  | 0.98  |
| 0 | -4 | -5  | 28.91  | 0.98  |
| 0 | -4 | -5  | 28.08  | 1.02  |
| 0 | 4  | -6  | 3.83   | 0.17  |
| 0 | 4  | -6  | 3.71   | 0.24  |
| 0 | -4 | -6  | 3.79   | 0.23  |
| 0 | -4 | -6  | 3.67   | 0.23  |
| 0 | -4 | 6   | 3.49   | 0.26  |
| 0 | 4  | 7   | 9.24   | 0.44  |
| 0 | -4 | 7   | 8.98   | 0.48  |
| 0 | -4 | -7  | 8.95   | 0.39  |
| 0 | -4 | -7  | 9.13   | 0.40  |
| 0 | 4  | 8   | 6.44   | 0.36  |
| 0 | 4  | -8  | 4.74   | 0.30  |
| 0 | -4 | 8   | 6.23   | 0.40  |
| 0 | -4 | -8  | 6.44   | 0.31  |
| 0 | -4 | -8  | 6.33   | 0.33  |

|   |    |     |        |      |
|---|----|-----|--------|------|
| 0 | 4  | 9   | 42.93  | 1.78 |
| 0 | 4  | -9  | 40.60  | 1.47 |
| 0 | -4 | 9   | 41.15  | 1.80 |
| 0 | -4 | -9  | 42.27  | 1.52 |
| 0 | -4 | -9  | 40.72  | 1.46 |
| 0 | 4  | -10 | 18.65  | 0.73 |
| 0 | -4 | -10 | 19.09  | 0.74 |
| 0 | -4 | 10  | 18.67  | 0.90 |
| 0 | 4  | -11 | 2.94   | 0.33 |
| 0 | -4 | -11 | 2.65   | 0.27 |
| 0 | -4 | 11  | 3.06   | 0.42 |
| 0 | 4  | -12 | 1.20   | 0.28 |
| 0 | -4 | -12 | 0.97   | 0.27 |
| 0 | -4 | 12  | 1.17   | 0.32 |
| 0 | 4  | -13 | 4.89   | 0.46 |
| 0 | -4 | 13  | 5.27   | 0.52 |
| 0 | -4 | -13 | 4.53   | 0.45 |
| 0 | 4  | -14 | 8.36   | 0.53 |
| 0 | -4 | 14  | 8.37   | 0.63 |
| 0 | -4 | -14 | 8.08   | 0.51 |
| 0 | 5  | 0   | 0.20   | 0.05 |
| 0 | 5  | -1  | 21.74  | 0.92 |
| 0 | 5  | -1  | 22.00  | 0.75 |
| 0 | 5  | 1   | 22.32  | 0.92 |
| 0 | -5 | -1  | 21.06  | 0.75 |
| 0 | 5  | -2  | 163.96 | 5.31 |
| 0 | 5  | -2  | 128.32 | 5.07 |
| 0 | 5  | 2   | 151.74 | 6.20 |
| 0 | -5 | -2  | 149.83 | 5.12 |
| 0 | 5  | 3   | 19.60  | 0.79 |
| 0 | 5  | -3  | 17.71  | 0.66 |
| 0 | 5  | -3  | 19.46  | 0.68 |
| 0 | 5  | -3  | 18.19  | 0.81 |
| 0 | -5 | -3  | 18.24  | 0.65 |
| 0 | 5  | -4  | 0.54   | 0.06 |
| 0 | 5  | -4  | 0.44   | 0.11 |
| 0 | 5  | 4   | 0.45   | 0.09 |
| 0 | 5  | -4  | 0.47   | 0.09 |
| 0 | -5 | -4  | 0.48   | 0.08 |
| 0 | 5  | -5  | 23.26  | 0.85 |
| 0 | 5  | 5   | 24.01  | 1.03 |
| 0 | 5  | -5  | 24.37  | 0.87 |
| 0 | -5 | -5  | 24.30  | 0.85 |
| 0 | -5 | -5  | 24.44  | 0.89 |
| 0 | 5  | -6  | 13.43  | 0.52 |
| 0 | 5  | -6  | 13.21  | 0.49 |
| 0 | -5 | 6   | 13.48  | 0.63 |
| 0 | -5 | -6  | 13.05  | 0.50 |
| 0 | -5 | -6  | 12.96  | 0.52 |
| 0 | 5  | 7   | 54.47  | 2.41 |
| 0 | 5  | -7  | 50.99  | 1.98 |
| 0 | -5 | -7  | 61.86  | 2.07 |
| 0 | -5 | 7   | 59.11  | 2.43 |
| 0 | -5 | -7  | 60.71  | 1.98 |

|   |    |     |       |      |
|---|----|-----|-------|------|
| 0 | 5  | -8  | 22.05 | 0.83 |
| 0 | 5  | 8   | 23.45 | 0.99 |
| 0 | -5 | -8  | 22.86 | 0.86 |
| 0 | -5 | 8   | 21.89 | 1.00 |
| 0 | -5 | -8  | 21.78 | 0.82 |
| 0 | 5  | -9  | 8.31  | 0.43 |
| 0 | -5 | -9  | 7.91  | 0.38 |
| 0 | -5 | 9   | 7.81  | 0.47 |
| 0 | -5 | -9  | 8.16  | 0.40 |
| 0 | 5  | -10 | 9.73  | 0.49 |
| 0 | -5 | 10  | 9.60  | 0.55 |
| 0 | -5 | -10 | 9.73  | 0.47 |
| 0 | 5  | -11 | 8.00  | 0.47 |
| 0 | -5 | -11 | 7.34  | 0.45 |
| 0 | -5 | 11  | 7.53  | 0.53 |
| 0 | 5  | -12 | 4.47  | 0.42 |
| 0 | -5 | -12 | 4.26  | 0.40 |
| 0 | -5 | 12  | 4.74  | 0.49 |
| 0 | 5  | -13 | 0.17  | 0.30 |
| 0 | -5 | 13  | 0.01  | 0.34 |
| 0 | -5 | -13 | -0.17 | 0.28 |
| 0 | 5  | -14 | 0.43  | 0.34 |
| 0 | -5 | -14 | -0.20 | 0.31 |
| 0 | -5 | 14  | 0.30  | 0.38 |
| 0 | 6  | 0   | 48.91 | 2.05 |
| 0 | 6  | -1  | 15.99 | 0.70 |
| 0 | 6  | 1   | 16.40 | 0.69 |
| 0 | -6 | -1  | 16.33 | 0.57 |
| 0 | 6  | 2   | 4.93  | 0.22 |
| 0 | -6 | -2  | 4.55  | 0.20 |
| 0 | 6  | -3  | 46.51 | 1.62 |
| 0 | 6  | 3   | 45.25 | 1.89 |
| 0 | 6  | -3  | 44.69 | 1.90 |
| 0 | 6  | -3  | 45.29 | 1.55 |
| 0 | -6 | -3  | 44.18 | 1.55 |
| 0 | 6  | -4  | 0.37  | 0.07 |
| 0 | 6  | -4  | 0.24  | 0.10 |
| 0 | 6  | 4   | 0.30  | 0.08 |
| 0 | 6  | -4  | 0.29  | 0.12 |
| 0 | -6 | -4  | 0.27  | 0.10 |
| 0 | -6 | -4  | 0.49  | 0.09 |
| 0 | 6  | 5   | 83.37 | 3.42 |
| 0 | 6  | -5  | 79.87 | 2.80 |
| 0 | 6  | -5  | 83.44 | 2.91 |
| 0 | -6 | -5  | 83.30 | 2.93 |
| 0 | -6 | -5  | 79.47 | 2.79 |
| 0 | 6  | 6   | 19.87 | 0.82 |
| 0 | 6  | -6  | 18.97 | 0.68 |
| 0 | 6  | -6  | 17.92 | 0.68 |
| 0 | -6 | -6  | 18.11 | 0.68 |
| 0 | -6 | -6  | 17.98 | 0.71 |
| 0 | 6  | -7  | 2.51  | 0.26 |
| 0 | -6 | -7  | 2.28  | 0.24 |
| 0 | -6 | -7  | 2.33  | 0.24 |

|   |    |     |        |      |
|---|----|-----|--------|------|
| 0 | -6 | 7   | 2.52   | 0.27 |
| 0 | 6  | -8  | 1.32   | 0.19 |
| 0 | -6 | -8  | 1.55   | 0.17 |
| 0 | -6 | -8  | 1.68   | 0.17 |
| 0 | -6 | 8   | 1.34   | 0.22 |
| 0 | 6  | -9  | 28.09  | 1.05 |
| 0 | -6 | -9  | 29.89  | 1.05 |
| 0 | -6 | -9  | 29.84  | 1.09 |
| 0 | -6 | 9   | 27.88  | 1.28 |
| 0 | 6  | -10 | 12.94  | 0.57 |
| 0 | -6 | 10  | 11.63  | 0.64 |
| 0 | -6 | -10 | 12.19  | 0.54 |
| 0 | 6  | -11 | 2.11   | 0.27 |
| 0 | -6 | 11  | 2.15   | 0.33 |
| 0 | -6 | -11 | 2.19   | 0.27 |
| 0 | 6  | -12 | 2.58   | 0.32 |
| 0 | -6 | 12  | 2.80   | 0.37 |
| 0 | -6 | -12 | 2.35   | 0.30 |
| 0 | 6  | -13 | 0.27   | 0.29 |
| 0 | -6 | -13 | 0.03   | 0.29 |
| 0 | -6 | 13  | 0.30   | 0.37 |
| 0 | 6  | -14 | 0.57   | 0.35 |
| 0 | -6 | 14  | 0.26   | 0.40 |
| 0 | -6 | -14 | -0.15  | 0.32 |
| 0 | 7  | 0   | 0.04   | 0.08 |
| 0 | 7  | 1   | 29.00  | 1.19 |
| 0 | -7 | -1  | 27.39  | 0.97 |
| 0 | 7  | -2  | 79.08  | 3.27 |
| 0 | 7  | -2  | 77.58  | 2.66 |
| 0 | 7  | 2   | 81.32  | 3.26 |
| 0 | -7 | -2  | 74.67  | 2.66 |
| 0 | 7  | -3  | 6.81   | 0.29 |
| 0 | 7  | 3   | 7.25   | 0.31 |
| 0 | 7  | -3  | 7.01   | 0.35 |
| 0 | -7 | -3  | 6.41   | 0.28 |
| 0 | 7  | -4  | 49.63  | 2.10 |
| 0 | 7  | -4  | 49.39  | 1.71 |
| 0 | 7  | 4   | 49.58  | 2.07 |
| 0 | -7 | -4  | 50.86  | 1.79 |
| 0 | -7 | -4  | 48.73  | 1.70 |
| 0 | 7  | 5   | 20.39  | 0.84 |
| 0 | 7  | -5  | 19.45  | 0.87 |
| 0 | 7  | -5  | 19.09  | 0.71 |
| 0 | 7  | -5  | 19.87  | 0.72 |
| 0 | -7 | -5  | 19.46  | 0.71 |
| 0 | -7 | -5  | 19.44  | 0.75 |
| 0 | 7  | -6  | 137.30 | 4.71 |
| 0 | 7  | -6  | 136.66 | 4.92 |
| 0 | 7  | 6   | 144.18 | 5.78 |
| 0 | -7 | -6  | 137.33 | 4.70 |
| 0 | -7 | -6  | 136.48 | 4.93 |
| 0 | 7  | -7  | 3.05   | 0.25 |
| 0 | -7 | 7   | 2.97   | 0.33 |
| 0 | -7 | -7  | 3.11   | 0.24 |

|   |    |     |        |      |
|---|----|-----|--------|------|
| 0 | -7 | -7  | 2.63   | 0.27 |
| 0 | 7  | -8  | 5.06   | 0.32 |
| 0 | -7 | 8   | 4.97   | 0.41 |
| 0 | -7 | -8  | 4.91   | 0.32 |
| 0 | -7 | -8  | 5.07   | 0.32 |
| 0 | 7  | -9  | 0.35   | 0.22 |
| 0 | -7 | -9  | 0.22   | 0.19 |
| 0 | -7 | 9   | 0.13   | 0.25 |
| 0 | -7 | -9  | 0.01   | 0.18 |
| 0 | 7  | -10 | 0.47   | 0.24 |
| 0 | -7 | -10 | 0.17   | 0.21 |
| 0 | -7 | 10  | 0.59   | 0.28 |
| 0 | -7 | -10 | 0.45   | 0.22 |
| 0 | 7  | -11 | 8.94   | 0.50 |
| 0 | -7 | 11  | 7.99   | 0.54 |
| 0 | -7 | -11 | 8.09   | 0.43 |
| 0 | 7  | -12 | 11.46  | 0.58 |
| 0 | -7 | -12 | 11.80  | 0.59 |
| 0 | -7 | 12  | 12.22  | 0.72 |
| 0 | 7  | -13 | 1.52   | 0.31 |
| 0 | -7 | 13  | 1.63   | 0.40 |
| 0 | -7 | -13 | 1.23   | 0.30 |
| 0 | -7 | 14  | 0.24   | 0.41 |
| 0 | -7 | -14 | -0.25  | 0.32 |
| 0 | 8  | 0   | 1.45   | 0.15 |
| 0 | -8 | 0   | 1.21   | 0.11 |
| 0 | 8  | 1   | 126.43 | 5.17 |
| 0 | -8 | -1  | 120.94 | 4.19 |
| 0 | 8  | 2   | 2.97   | 0.17 |
| 0 | 8  | -2  | 3.06   | 0.22 |
| 0 | 8  | -2  | 3.06   | 0.19 |
| 0 | -8 | -2  | 2.75   | 0.18 |
| 0 | 8  | -3  | 5.17   | 0.26 |
| 0 | 8  | -3  | 5.26   | 0.29 |
| 0 | 8  | 3   | 5.24   | 0.24 |
| 0 | -8 | -3  | 5.05   | 0.24 |
| 0 | 8  | -4  | 0.14   | 0.13 |
| 0 | 8  | -4  | 0.29   | 0.12 |
| 0 | -8 | -4  | 0.15   | 0.11 |
| 0 | -8 | -4  | 0.14   | 0.10 |
| 0 | 8  | -5  | 62.08  | 2.59 |
| 0 | 8  | -5  | 60.61  | 2.10 |
| 0 | -8 | -5  | 61.09  | 2.20 |
| 0 | -8 | -5  | 60.60  | 2.09 |
| 0 | 8  | -6  | 4.13   | 0.29 |
| 0 | -8 | -6  | 4.04   | 0.30 |
| 0 | -8 | -6  | 3.95   | 0.26 |
| 0 | 8  | -7  | 8.59   | 0.42 |
| 0 | -8 | 7   | 8.68   | 0.51 |
| 0 | -8 | -7  | 8.59   | 0.40 |
| 0 | -8 | -7  | 8.53   | 0.42 |
| 0 | 8  | -8  | 1.25   | 0.20 |
| 0 | -8 | -8  | 1.39   | 0.19 |
| 0 | -8 | -8  | 1.34   | 0.19 |

|   |    |     |       |      |
|---|----|-----|-------|------|
| 0 | -8 | 8   | 1.37  | 0.26 |
| 0 | 8  | -9  | 9.04  | 0.46 |
| 0 | -8 | -9  | 9.38  | 0.46 |
| 0 | -8 | 9   | 9.91  | 0.58 |
| 0 | -8 | -9  | 9.77  | 0.48 |
| 0 | 8  | -10 | 0.84  | 0.26 |
| 0 | -8 | 10  | 0.31  | 0.27 |
| 0 | -8 | -10 | 0.28  | 0.22 |
| 0 | -8 | -10 | 0.27  | 0.23 |
| 0 | 8  | -11 | 3.90  | 0.38 |
| 0 | -8 | 11  | 3.67  | 0.48 |
| 0 | -8 | -11 | 3.80  | 0.37 |
| 0 | 8  | -12 | 0.19  | 0.27 |
| 0 | -8 | 12  | -0.01 | 0.36 |
| 0 | -8 | -12 | -0.12 | 0.27 |
| 0 | 8  | -13 | 4.96  | 0.51 |
| 0 | -8 | -13 | 4.13  | 0.45 |
| 0 | -8 | 13  | 4.31  | 0.58 |
| 0 | -8 | -14 | 0.69  | 0.34 |
| 0 | 9  | 0   | -0.04 | 0.03 |
| 0 | -9 | 0   | -0.12 | 0.09 |
| 0 | 9  | 1   | 6.15  | 0.30 |
| 0 | 9  | -1  | 5.85  | 0.31 |
| 0 | -9 | -1  | 6.07  | 0.27 |
| 0 | 9  | -2  | 55.07 | 2.33 |
| 0 | 9  | 2   | 56.06 | 2.31 |
| 0 | -9 | -2  | 54.45 | 1.89 |
| 0 | 9  | -3  | 0.19  | 0.13 |
| 0 | 9  | -3  | 0.22  | 0.11 |
| 0 | 9  | 3   | 0.33  | 0.08 |
| 0 | -9 | -3  | 0.69  | 0.11 |
| 0 | 9  | -4  | 2.33  | 0.22 |
| 0 | 9  | -4  | 2.58  | 0.27 |
| 0 | 9  | 4   | 2.50  | 0.16 |
| 0 | -9 | -4  | 2.41  | 0.24 |
| 0 | -9 | -4  | 2.45  | 0.20 |
| 0 | 9  | -5  | 22.48 | 1.01 |
| 0 | 9  | -5  | 22.80 | 0.83 |
| 0 | -9 | -5  | 22.56 | 0.87 |
| 0 | -9 | -5  | 22.82 | 0.82 |
| 0 | 9  | -6  | 33.83 | 1.20 |
| 0 | -9 | -6  | 33.30 | 1.19 |
| 0 | -9 | -6  | 34.23 | 1.26 |
| 0 | 9  | -7  | 10.16 | 0.45 |
| 0 | -9 | 7   | 10.39 | 0.56 |
| 0 | -9 | -7  | 10.99 | 0.46 |
| 0 | -9 | -7  | 10.41 | 0.49 |
| 0 | 9  | -8  | 3.69  | 0.30 |
| 0 | -9 | -8  | 3.60  | 0.33 |
| 0 | -9 | 8   | 3.53  | 0.36 |
| 0 | -9 | -8  | 3.67  | 0.31 |
| 0 | 9  | -9  | 0.03  | 0.23 |
| 0 | -9 | -9  | 0.03  | 0.20 |
| 0 | -9 | 9   | 0.04  | 0.28 |

|   |     |     |       |      |
|---|-----|-----|-------|------|
| 0 | -9  | -9  | -0.13 | 0.20 |
| 0 | 9   | -10 | 1.26  | 0.27 |
| 0 | -9  | -10 | 1.23  | 0.24 |
| 0 | -9  | -10 | 0.97  | 0.24 |
| 0 | -9  | 10  | 0.99  | 0.29 |
| 0 | 9   | -11 | 1.13  | 0.30 |
| 0 | -9  | 11  | 1.24  | 0.35 |
| 0 | -9  | -11 | 0.99  | 0.27 |
| 0 | 9   | -12 | 11.25 | 0.62 |
| 0 | -9  | -12 | 10.60 | 0.57 |
| 0 | -9  | 12  | 11.34 | 0.73 |
| 0 | 9   | -13 | 0.78  | 0.35 |
| 0 | -9  | 13  | 0.30  | 0.41 |
| 0 | -9  | -13 | 0.08  | 0.30 |
| 0 | -9  | -14 | 0.95  | 0.34 |
| 0 | 10  | 0   | 4.41  | 0.26 |
| 0 | -10 | 0   | 4.44  | 0.24 |
| 0 | 10  | -1  | 18.36 | 0.81 |
| 0 | -10 | -1  | 18.74 | 0.67 |
| 0 | 10  | 2   | 2.23  | 0.18 |
| 0 | 10  | -2  | 2.62  | 0.23 |
| 0 | -10 | -2  | 2.53  | 0.19 |
| 0 | 10  | -3  | 31.85 | 1.40 |
| 0 | 10  | 3   | 32.98 | 1.36 |
| 0 | 10  | -3  | 32.96 | 1.14 |
| 0 | -10 | -3  | 31.84 | 1.13 |
| 0 | 10  | -4  | 3.63  | 0.31 |
| 0 | 10  | -4  | 3.61  | 0.25 |
| 0 | -10 | -4  | 3.37  | 0.28 |
| 0 | -10 | -4  | 3.42  | 0.24 |
| 0 | 10  | -5  | 29.15 | 1.31 |
| 0 | 10  | -5  | 30.73 | 1.07 |
| 0 | -10 | -5  | 29.55 | 1.06 |
| 0 | -10 | -5  | 30.31 | 1.12 |
| 0 | 10  | -6  | 5.26  | 0.34 |
| 0 | -10 | -6  | 5.04  | 0.35 |
| 0 | -10 | -6  | 5.61  | 0.31 |
| 0 | 10  | -7  | 0.36  | 0.18 |
| 0 | -10 | -7  | 0.46  | 0.19 |
| 0 | -10 | -7  | 0.50  | 0.18 |
| 0 | -10 | 7   | 0.13  | 0.23 |
| 0 | 10  | -8  | 3.61  | 0.35 |
| 0 | -10 | 8   | 3.77  | 0.42 |
| 0 | -10 | -8  | 3.69  | 0.35 |
| 0 | -10 | -8  | 4.05  | 0.33 |
| 0 | 10  | -9  | 18.59 | 0.77 |
| 0 | -10 | 9   | 18.73 | 0.91 |
| 0 | -10 | -9  | 18.93 | 0.74 |
| 0 | -10 | -9  | 19.11 | 0.79 |
| 0 | 10  | -10 | 0.21  | 0.26 |
| 0 | -10 | 10  | 0.28  | 0.32 |
| 0 | -10 | -10 | -0.20 | 0.23 |
| 0 | -10 | -10 | 0.09  | 0.23 |
| 0 | 10  | -11 | 2.85  | 0.33 |

|   |     |     |       |      |
|---|-----|-----|-------|------|
| 0 | -10 | -11 | 2.60  | 0.29 |
| 0 | -10 | 11  | 2.51  | 0.39 |
| 0 | 10  | -12 | 0.84  | 0.33 |
| 0 | -10 | -12 | 0.46  | 0.28 |
| 0 | -10 | 12  | 0.62  | 0.39 |
| 0 | 10  | -13 | 1.65  | 0.37 |
| 0 | -10 | 13  | 2.10  | 0.45 |
| 0 | -10 | -13 | 1.29  | 0.34 |
| 0 | 11  | 0   | 0.01  | 0.12 |
| 0 | -11 | 0   | 0.09  | 0.12 |
| 0 | 11  | -1  | 4.56  | 0.28 |
| 0 | -11 | -1  | 4.82  | 0.25 |
| 0 | 11  | 2   | 41.86 | 1.76 |
| 0 | 11  | -2  | 41.74 | 1.78 |
| 0 | -11 | -2  | 41.82 | 1.44 |
| 0 | 11  | -3  | 6.81  | 0.39 |
| 0 | -11 | -3  | 6.59  | 0.31 |
| 0 | 11  | -4  | 13.52 | 0.54 |
| 0 | 11  | -4  | 13.42 | 0.65 |
| 0 | -11 | -4  | 13.53 | 0.57 |
| 0 | -11 | -4  | 13.40 | 0.52 |
| 0 | 11  | -5  | 17.81 | 0.86 |
| 0 | 11  | -5  | 18.60 | 0.69 |
| 0 | -11 | -5  | 18.55 | 0.70 |
| 0 | -11 | -5  | 18.94 | 0.74 |
| 0 | 11  | -6  | 11.39 | 0.48 |
| 0 | -11 | -6  | 11.75 | 0.48 |
| 0 | -11 | -6  | 10.91 | 0.51 |
| 0 | 11  | -7  | 20.19 | 0.79 |
| 0 | -11 | -7  | 21.19 | 0.78 |
| 0 | -11 | 7   | 20.58 | 0.99 |
| 0 | -11 | -7  | 20.96 | 0.84 |
| 0 | 11  | -8  | 8.42  | 0.47 |
| 0 | -11 | -8  | 8.87  | 0.43 |
| 0 | -11 | -8  | 8.26  | 0.48 |
| 0 | -11 | 8   | 8.47  | 0.56 |
| 0 | 11  | -9  | 0.16  | 0.25 |
| 0 | -11 | -9  | 0.06  | 0.23 |
| 0 | -11 | 9   | 0.14  | 0.28 |
| 0 | -11 | -9  | 0.00  | 0.23 |
| 0 | 11  | -10 | 5.21  | 0.45 |
| 0 | -11 | -10 | 4.54  | 0.38 |
| 0 | -11 | -10 | 4.67  | 0.43 |
| 0 | -11 | 10  | 5.00  | 0.52 |
| 0 | 11  | -11 | 0.47  | 0.31 |
| 0 | -11 | 11  | 0.28  | 0.33 |
| 0 | -11 | -11 | 0.15  | 0.26 |
| 0 | 11  | -12 | 3.57  | 0.37 |
| 0 | -11 | -12 | 3.48  | 0.33 |
| 0 | -11 | 12  | 3.56  | 0.47 |
| 0 | 12  | 0   | 7.74  | 0.40 |
| 0 | -12 | 0   | 8.01  | 0.36 |
| 0 | 12  | -1  | 35.46 | 1.50 |
| 0 | 12  | 1   | 34.92 | 1.49 |

|   |     |     |       |      |
|---|-----|-----|-------|------|
| 0 | -12 | -1  | 35.10 | 1.23 |
| 0 | 12  | -2  | 14.29 | 0.66 |
| 0 | -12 | -2  | 13.64 | 0.53 |
| 0 | 12  | -3  | 0.21  | 0.17 |
| 0 | -12 | -3  | 0.15  | 0.13 |
| 0 | 12  | -4  | 0.19  | 0.18 |
| 0 | 12  | -4  | 0.20  | 0.17 |
| 0 | -12 | -4  | -0.06 | 0.18 |
| 0 | -12 | -4  | 0.13  | 0.15 |
| 0 | 12  | -5  | 1.49  | 0.22 |
| 0 | 12  | -5  | 1.58  | 0.20 |
| 0 | -12 | -5  | 1.50  | 0.17 |
| 0 | -12 | -5  | 1.26  | 0.19 |
| 0 | 12  | -6  | 0.18  | 0.18 |
| 0 | -12 | -6  | 0.32  | 0.18 |
| 0 | -12 | 6   | -0.02 | 0.23 |
| 0 | -12 | -6  | -0.03 | 0.18 |
| 0 | 12  | -7  | 2.18  | 0.25 |
| 0 | -12 | -7  | 1.92  | 0.23 |
| 0 | -12 | -7  | 2.14  | 0.21 |
| 0 | -12 | 7   | 1.99  | 0.29 |
| 0 | 12  | -8  | 0.40  | 0.24 |
| 0 | -12 | -8  | 0.36  | 0.24 |
| 0 | -12 | 8   | 0.39  | 0.30 |
| 0 | -12 | -8  | 0.67  | 0.21 |
| 0 | 12  | -9  | 5.81  | 0.41 |
| 0 | -12 | -9  | 5.79  | 0.40 |
| 0 | -12 | 9   | 6.14  | 0.53 |
| 0 | -12 | -9  | 5.94  | 0.45 |
| 0 | 12  | -10 | 0.10  | 0.29 |
| 0 | -12 | -10 | -0.09 | 0.26 |
| 0 | -12 | 10  | 0.26  | 0.35 |
| 0 | -12 | -10 | 0.13  | 0.25 |
| 0 | 12  | -11 | 1.50  | 0.34 |
| 0 | -12 | -11 | 1.02  | 0.27 |
| 0 | -12 | -11 | 0.91  | 0.30 |
| 0 | -12 | 11  | 1.19  | 0.40 |
| 0 | 12  | -12 | 0.00  | 0.35 |
| 0 | -12 | 12  | 0.26  | 0.43 |
| 0 | 13  | 0   | 0.06  | 0.15 |
| 0 | -13 | 0   | 0.09  | 0.14 |
| 0 | 13  | 1   | 0.34  | 0.13 |
| 0 | 13  | -1  | 0.32  | 0.15 |
| 0 | -13 | 1   | -0.17 | 0.15 |
| 0 | -13 | -1  | 0.40  | 0.14 |
| 0 | 13  | -2  | 2.29  | 0.27 |
| 0 | -13 | -2  | 2.73  | 0.26 |
| 0 | 13  | -3  | 48.79 | 2.07 |
| 0 | -13 | -3  | 48.33 | 1.68 |
| 0 | 13  | -4  | 22.15 | 1.02 |
| 0 | -13 | -4  | 22.80 | 0.89 |
| 0 | -13 | -4  | 22.27 | 0.82 |
| 0 | 13  | -5  | 3.38  | 0.28 |
| 0 | -13 | -5  | 3.68  | 0.34 |

|   |     |     |       |      |
|---|-----|-----|-------|------|
| 0 | -13 | -5  | 3.58  | 0.31 |
| 0 | 13  | -6  | 9.47  | 0.46 |
| 0 | -13 | -6  | 9.51  | 0.46 |
| 0 | -13 | -6  | 8.82  | 0.46 |
| 0 | -13 | 6   | 9.03  | 0.54 |
| 0 | 13  | -7  | 0.39  | 0.23 |
| 0 | -13 | 7   | 0.05  | 0.26 |
| 0 | -13 | -7  | -0.03 | 0.21 |
| 0 | -13 | -7  | 0.17  | 0.21 |
| 0 | 13  | -8  | 1.87  | 0.25 |
| 0 | -13 | -8  | 1.42  | 0.24 |
| 0 | -13 | 8   | 1.67  | 0.32 |
| 0 | -13 | -8  | 2.11  | 0.24 |
| 0 | 13  | -9  | 0.45  | 0.25 |
| 0 | -13 | -9  | 0.50  | 0.25 |
| 0 | -13 | -9  | 0.59  | 0.26 |
| 0 | -13 | 9   | 0.62  | 0.32 |
| 0 | 13  | -10 | 0.82  | 0.30 |
| 0 | -13 | 10  | 0.72  | 0.35 |
| 0 | -13 | -10 | 0.72  | 0.30 |
| 0 | 13  | -11 | 6.30  | 0.48 |
| 0 | -13 | 11  | 5.63  | 0.61 |
| 0 | -13 | -11 | 6.19  | 0.55 |
| 0 | 13  | -12 | 5.09  | 0.55 |
| 0 | 14  | 0   | 5.50  | 0.34 |
| 0 | -14 | 0   | 5.75  | 0.32 |
| 0 | 14  | -1  | 2.95  | 0.29 |
| 0 | -14 | -1  | 3.10  | 0.26 |
| 0 | -14 | 1   | 2.50  | 0.22 |
| 0 | 14  | -2  | 0.03  | 0.18 |
| 0 | -14 | -2  | 0.17  | 0.16 |
| 0 | 14  | -3  | 1.32  | 0.21 |
| 0 | -14 | -3  | 0.84  | 0.21 |
| 0 | -14 | -3  | 1.06  | 0.17 |
| 0 | 14  | -4  | 0.90  | 0.23 |
| 0 | -14 | -4  | 0.87  | 0.17 |
| 0 | -14 | -4  | 0.77  | 0.19 |
| 0 | -14 | -5  | 10.07 | 0.52 |
| 0 | -14 | -5  | 10.58 | 0.48 |
| 0 | 14  | -6  | 7.87  | 0.44 |
| 0 | -14 | -6  | 7.07  | 0.46 |
| 0 | -14 | 6   | 8.16  | 0.55 |
| 0 | -14 | -6  | 7.63  | 0.41 |
| 0 | 14  | -7  | 0.11  | 0.24 |
| 0 | -14 | -7  | -0.02 | 0.22 |
| 0 | -14 | -7  | 0.26  | 0.21 |
| 0 | -14 | 7   | -0.28 | 0.30 |
| 0 | 14  | -8  | 0.25  | 0.26 |
| 0 | -14 | -8  | -0.06 | 0.25 |
| 0 | -14 | -8  | 0.19  | 0.24 |
| 0 | -14 | 8   | -0.05 | 0.30 |
| 0 | 14  | -9  | 0.66  | 0.29 |
| 0 | -14 | -9  | 0.17  | 0.27 |
| 0 | -14 | 9   | 0.29  | 0.37 |

|   |     |     |       |      |
|---|-----|-----|-------|------|
| 0 | 14  | -10 | 4.78  | 0.44 |
| 0 | -14 | -10 | 4.64  | 0.48 |
| 0 | -14 | 10  | 5.41  | 0.59 |
| 0 | 14  | -11 | 2.05  | 0.37 |
| 0 | -14 | 11  | 2.10  | 0.46 |
| 0 | -14 | -11 | 1.72  | 0.35 |
| 0 | -15 | 0   | 0.08  | 0.18 |
| 0 | 15  | -1  | 17.05 | 0.80 |
| 0 | -15 | -1  | 17.97 | 0.68 |
| 0 | -15 | 1   | 17.30 | 0.68 |
| 0 | 15  | -2  | 0.39  | 0.20 |
| 0 | -15 | -2  | 0.41  | 0.17 |
| 0 | 15  | -3  | 2.16  | 0.25 |
| 0 | -15 | -3  | 1.88  | 0.20 |
| 0 | -15 | -3  | 1.47  | 0.21 |
| 0 | -15 | -4  | 8.95  | 0.48 |
| 0 | -15 | -4  | 9.08  | 0.42 |
| 0 | -15 | -5  | 0.05  | 0.19 |
| 0 | -15 | 5   | -0.15 | 0.27 |
| 0 | -15 | -5  | -0.36 | 0.22 |
| 0 | -15 | 6   | -0.07 | 0.31 |
| 0 | -15 | -6  | 0.73  | 0.22 |
| 0 | -15 | -6  | 0.40  | 0.24 |
| 0 | 15  | -7  | 9.90  | 0.50 |
| 0 | -15 | -7  | 10.14 | 0.55 |
| 0 | -15 | 7   | 10.04 | 0.65 |
| 0 | 15  | -8  | 1.26  | 0.29 |
| 0 | -15 | 8   | 1.19  | 0.37 |
| 0 | -15 | -8  | 0.94  | 0.26 |
| 0 | 15  | -9  | 0.66  | 0.30 |
| 0 | -15 | -9  | -0.10 | 0.28 |
| 0 | -15 | 9   | 0.46  | 0.39 |
| 0 | 15  | -10 | 0.83  | 0.33 |
| 0 | -15 | 10  | 0.96  | 0.43 |
| 0 | -15 | -10 | 0.48  | 0.31 |
| 0 | 15  | -11 | 0.96  | 0.36 |
| 0 | -15 | -11 | 0.47  | 0.33 |
| 0 | -15 | 11  | 0.75  | 0.46 |
| 0 | -16 | 0   | 9.00  | 0.43 |
| 0 | -16 | 1   | 8.50  | 0.45 |
| 0 | -16 | -1  | 8.65  | 0.43 |
| 0 | 16  | -2  | 2.27  | 0.31 |
| 0 | -16 | -2  | 1.80  | 0.23 |
| 0 | -16 | -2  | 2.12  | 0.21 |
| 0 | -16 | 2   | 1.94  | 0.23 |
| 0 | 16  | -3  | 0.89  | 0.23 |
| 0 | -16 | -3  | 0.87  | 0.20 |
| 0 | -16 | -3  | 0.75  | 0.21 |
| 0 | -16 | -4  | 0.62  | 0.20 |
| 0 | -16 | -4  | 0.31  | 0.21 |
| 0 | -16 | -5  | 0.84  | 0.23 |
| 0 | -16 | 5   | 0.70  | 0.31 |
| 0 | -16 | -6  | 0.53  | 0.26 |
| 0 | -16 | 6   | 0.26  | 0.32 |

|   |     |     |       |      |
|---|-----|-----|-------|------|
| 0 | -16 | 7   | 0.71  | 0.35 |
| 0 | -16 | -7  | 0.87  | 0.28 |
| 0 | 16  | -8  | 0.46  | 0.29 |
| 0 | -16 | -8  | 0.60  | 0.29 |
| 0 | -16 | 8   | 0.69  | 0.39 |
| 0 | 16  | -9  | 1.23  | 0.30 |
| 0 | -16 | 9   | 1.15  | 0.41 |
| 0 | -16 | -9  | 0.83  | 0.31 |
| 0 | 16  | -10 | 2.07  | 0.37 |
| 0 | -16 | -10 | 1.68  | 0.34 |
| 0 | -16 | 10  | 1.84  | 0.46 |
| 0 | -16 | -11 | 1.38  | 0.37 |
| 0 | -17 | 0   | 0.29  | 0.19 |
| 0 | -17 | -1  | 3.00  | 0.33 |
| 0 | -17 | 1   | 2.52  | 0.24 |
| 0 | -17 | -2  | 0.18  | 0.24 |
| 0 | -17 | 2   | 0.14  | 0.23 |
| 0 | -17 | -2  | 0.48  | 0.19 |
| 0 | -17 | -3  | 4.58  | 0.39 |
| 0 | -17 | -4  | -0.18 | 0.24 |
| 0 | -17 | 4   | -0.02 | 0.29 |
| 0 | -17 | -5  | 0.21  | 0.25 |
| 0 | -17 | 5   | 0.01  | 0.31 |
| 0 | -17 | -6  | 3.78  | 0.41 |
| 0 | -17 | 6   | 3.09  | 0.39 |
| 0 | -17 | -7  | 1.20  | 0.29 |
| 0 | -17 | 7   | 1.45  | 0.39 |
| 0 | -17 | -8  | 0.21  | 0.30 |
| 0 | -17 | 8   | 0.20  | 0.40 |
| 0 | 17  | -9  | 0.66  | 0.33 |
| 0 | -17 | -9  | 0.44  | 0.32 |
| 0 | -17 | 9   | 0.69  | 0.43 |
| 0 | 17  | -10 | 0.49  | 0.36 |
| 0 | -17 | -10 | -0.41 | 0.32 |
| 0 | -18 | -1  | 0.53  | 0.26 |
| 0 | -18 | 1   | 0.66  | 0.23 |
| 0 | -18 | -2  | 0.45  | 0.25 |
| 0 | -18 | 2   | 0.35  | 0.24 |
| 0 | -18 | -3  | 0.55  | 0.26 |
| 0 | -18 | 3   | 0.06  | 0.30 |
| 0 | -18 | -4  | 3.27  | 0.39 |
| 0 | -18 | 4   | 3.14  | 0.37 |
| 0 | -18 | -5  | 0.44  | 0.27 |
| 0 | -18 | 5   | 0.33  | 0.33 |
| 0 | -18 | -6  | 1.00  | 0.30 |
| 0 | -18 | 6   | 1.05  | 0.37 |
| 0 | -18 | -7  | 0.69  | 0.30 |
| 0 | -18 | 7   | 0.54  | 0.39 |
| 0 | -18 | -8  | 1.94  | 0.34 |
| 0 | -18 | 8   | 2.14  | 0.45 |
| 0 | -18 | -9  | -0.06 | 0.32 |
| 0 | -18 | 9   | 0.02  | 0.44 |
| 0 | -19 | 0   | -0.07 | 0.26 |
| 0 | -19 | 1   | 0.70  | 0.27 |

|    |     |     |       |       |      |
|----|-----|-----|-------|-------|------|
| 0  | -19 | -1  | 0.88  | 0.28  |      |
| 0  | -19 | -2  | -0.01 | 0.27  |      |
| 0  | -19 | -3  | 2.34  | 0.29  |      |
| 0  | -19 | 4   | 0.34  | 0.32  |      |
| 0  | -19 | -4  | 0.52  | 0.28  |      |
| 0  | -19 | -5  | -0.11 | 0.26  |      |
| 0  | -19 | 5   | -0.06 | 0.34  |      |
| 0  | -19 | -6  | 0.09  | 0.30  |      |
| 0  | -19 | 6   | -0.42 | 0.37  |      |
| 0  | -19 | -7  | 0.49  | 0.29  |      |
| 0  | -19 | 7   | 0.41  | 0.41  |      |
| 0  | -19 | 8   | 1.65  | 0.46  |      |
| 0  | -19 | -8  | 1.85  | 0.35  |      |
| 0  | -20 | 0   | 1.25  | 0.27  |      |
| 0  | -20 | 1   | 0.09  | 0.28  |      |
| 0  | -20 | -1  | 0.08  | 0.28  |      |
| 0  | -20 | -2  | 0.15  | 0.27  |      |
| 0  | -20 | 2   | -0.24 | 0.27  |      |
| 0  | -20 | -3  | 0.97  | 0.30  |      |
| 0  | -20 | -4  | 0.00  | 0.27  |      |
| 0  | -20 | -5  | 0.01  | 0.28  |      |
| 0  | -20 | -6  | 0.14  | 0.32  |      |
| 0  | -20 | 6   | -0.14 | 0.39  |      |
| 0  | -20 | 7   | 0.86  | 0.43  |      |
| 0  | -21 | 0   | -0.11 | 0.30  |      |
| 0  | -21 | 1   | 0.75  | 0.30  |      |
| 0  | -21 | -1  | 0.84  | 0.32  |      |
| 0  | -21 | -2  | 1.13  | 0.32  |      |
| 0  | -21 | 2   | 0.97  | 0.32  |      |
| 0  | -21 | -3  | 0.77  | 0.32  |      |
| 0  | -21 | -4  | 0.34  | 0.32  |      |
| 0  | -21 | -5  | -0.10 | 0.33  |      |
| 0  | -21 | 7   | 0.37  | 0.46  |      |
| 0  | -22 | 0   | -0.06 | 0.32  |      |
| 0  | -22 | 1   | -0.52 | 0.31  |      |
| 0  | -22 | -1  | 0.30  | 0.33  |      |
| 0  | -22 | -2  | 0.05  | 0.33  |      |
| 0  | -22 | -3  | 0.40  | 0.34  |      |
| 0  | -23 | 0   | -0.15 | 0.34  |      |
| 0  | -23 | -1  | 0.39  | 0.35  |      |
| 0  | -23 | 1   | 0.05  | 0.34  |      |
| 1. | 0   | -14 | 8.56  | 0.55  |      |
| 1. | 0   | -13 | 0.14  | 0.29  |      |
| 1. | 0   | -12 | 27.49 | 1.05  |      |
| -  | 1   | 0   | 12    | 27.34 | 1.24 |
| -  | 1   | 0   | 11    | -0.44 | 0.24 |
| 1. | 0   | -11 | -0.24 | 0.22  |      |
| 1. | 0   | -10 | 31.19 | 1.14  |      |
| -  | 1   | 0   | 10    | 31.94 | 1.38 |
| 1. | 0   | -9  | -0.07 | 0.16  |      |
| -  | 1   | 0   | 9     | -0.13 | 0.18 |
| 1. | 0   | -8  | 0.28  | 0.10  |      |
| -  | 1   | 0   | 8     | 0.05  | 0.16 |
| 1. | 0   | -7  | 0.34  | 0.11  |      |

|   |    |    |     |        |       |
|---|----|----|-----|--------|-------|
| - | 1  | 0  | 7   | 0.03   | 0.12  |
|   | 1. | 0  | -7  | -0.08  | 0.08  |
| - | 1  | 0  | 6   | 57.70  | 2.41  |
|   | 1. | 0  | -6  | 56.93  | 2.04  |
|   | 1. | 0  | -5  | -0.03  | 0.05  |
|   | 1. | 0  | -5  | 0.05   | 0.02  |
|   | 1. | 0  | -4  | 2.50   | 0.12  |
|   | 1. | 0  | -4  | 2.44   | 0.17  |
|   | 1. | 0  | -3  | -0.09  | 0.05  |
|   | 1. | 0  | -3  | 0.05   | 0.04  |
|   | 1. | 0  | -3  | 0.05   | 0.03  |
|   | 1. | 0  | -2  | 176.02 | 6.25  |
|   | 1. | 0  | -2  | 191.49 | 7.68  |
| - | 1  | 0  | 1   | 0.19   | 0.03  |
|   | 1. | 0  | -1  | 0.31   | 0.04  |
|   | 1. | 0  | -1  | 0.19   | 0.04  |
| - | 1  | 0  | -1  | 0.42   | 0.07  |
|   | 1. | 0  | 1   | 0.65   | 0.09  |
| - | 1  | 0  | -1  | 0.58   | 0.06  |
| - | 1  | 0  | -2  | 234.49 | 8.46  |
| - | 1  | 0  | -2  | 244.74 | 8.07  |
|   | 1. | 0  | 2   | 233.11 | 9.93  |
| - | 1  | 0  | -3  | 0.21   | 0.05  |
|   | 1. | 0  | 3   | -0.02  | 0.07  |
| - | 1  | 0  | -3  | 0.07   | 0.05  |
| - | 1  | 0  | -4  | 370.59 | 12.28 |
| - | 1  | 0  | -4  | 350.96 | 12.85 |
| - | 1  | 0  | -5  | 0.01   | 0.09  |
| - | 1  | 0  | -5  | -0.02  | 0.07  |
|   | 1. | 0  | 5   | 0.03   | 0.11  |
| - | 1  | 0  | -6  | 15.22  | 0.57  |
|   | 1. | 0  | 6   | 15.11  | 0.69  |
| - | 1  | 0  | -7  | -0.05  | 0.12  |
| - | 1  | 0  | -7  | -0.01  | 0.10  |
|   | 1. | 0  | 7   | -0.17  | 0.15  |
|   | 1. | 0  | 8   | 125.70 | 5.33  |
| - | 1  | 0  | -8  | 129.75 | 4.54  |
| - | 1  | 0  | -8  | 126.22 | 4.34  |
| - | 1  | 0  | -9  | 0.01   | 0.16  |
|   | 1. | 0  | 9   | -0.05  | 0.20  |
| - | 1  | 0  | -10 | -0.16  | 0.20  |
|   | 1. | 0  | 10  | 0.16   | 0.23  |
|   | 1. | 0  | 11  | 0.05   | 0.28  |
| - | 1  | 0  | -11 | -0.15  | 0.23  |
|   | 1. | 0  | 12  | 19.87  | 0.95  |
| - | 1  | 0  | -12 | 19.07  | 0.80  |
| - | 1  | 0  | -13 | -0.18  | 0.29  |
| - | 1  | 0  | -14 | 0.49   | 0.33  |
|   | 1. | 1  | -14 | -0.03  | 0.31  |
|   | 1. | -1 | -14 | 0.05   | 0.32  |
|   | 1. | 1  | -13 | 18.10  | 0.77  |
|   | 1. | -1 | -13 | 17.88  | 0.78  |
|   | 1. | 1  | -12 | -0.03  | 0.25  |
| - | 1  | -1 | 12  | 0.01   | 0.27  |

|    |    |     |        |        |
|----|----|-----|--------|--------|
| 1. | -1 | -12 | -0.28  | 0.23   |
| 1. | 1  | -11 | 0.52   | 0.21   |
| -  | 1  | 1   | 11     | 0.40   |
| -  | 1  | -1  | 11     | 0.50   |
| 1. | -1 | -11 | 0.25   | 0.23   |
| 1. | 1  | -10 | 2.89   | 0.32   |
| -  | 1  | 1   | 10     | 2.54   |
| -  | 1  | -1  | 10     | 2.75   |
| 1. | -1 | -10 | 2.69   | 0.28   |
| -  | 1  | 1   | 9      | 14.68  |
| 1. | 1  | -9  | 14.09  | 0.58   |
| -  | 1  | -1  | 9      | 14.06  |
| 1. | -1 | -9  | 14.47  | 0.59   |
| -  | 1  | 1   | 8      | 17.82  |
| -  | 1  | -1  | 8      | 17.69  |
| 1. | -1 | -8  | 17.68  | 0.67   |
| -  | 1  | 1   | 7      | 3.69   |
| 1. | 1  | -7  | 3.40   | 0.18   |
| 1. | -1 | -7  | 3.40   | 0.19   |
| 1. | -1 | -7  | 3.77   | 0.22   |
| -  | 1  | -1  | 7      | 3.68   |
| -  | 1  | 1   | 6      | 0.76   |
| 1. | 1  | -6  | 0.67   | 0.07   |
| 1. | -1 | -6  | 0.66   | 0.11   |
| 1. | -1 | -6  | 0.61   | 0.08   |
| 1. | 1  | -5  | 52.52  | 2.13   |
| 1. | 1  | -5  | 50.76  | 1.80   |
| 1. | -1 | -5  | 47.99  | 1.73   |
| 1. | -1 | -5  | 51.30  | 1.81   |
| 1. | 1  | -4  | 3.85   | 0.16   |
| 1. | 1  | -4  | 4.08   | 0.22   |
| 1. | -1 | -4  | 4.35   | 0.17   |
| 1. | -1 | -4  | 4.08   | 0.21   |
| 1. | 1  | -3  | 147.29 | 5.36   |
| 1. | 1  | -3  | 157.68 | 6.59   |
| 1. | -1 | -3  | 166.14 | 6.58   |
| 1. | 1  | -2  | 1.14   | 0.09   |
| 1. | 1  | -2  | 0.85   | 0.07   |
| 1. | -1 | -2  | 0.70   | 0.07   |
| 1. | 1  | -1  | 44.41  | 1.57   |
| -  | 1  | 1   | 1      | 48.38  |
| 1. | -1 | -1  | 45.65  | 1.93   |
| -  | 1  | -1  | 1      | 44.91  |
| 1. | 1  | 0   | 12.20  | 0.51   |
| 1. | -1 | 0   | 12.13  | 0.51   |
| 1. | 1  | 1   | 2.43   | 0.13   |
| -  | 1  | 1   | -1     | 2.28   |
| -  | 1  | -1  | -1     | 2.77   |
| -  | 1  | -1  | -1     | 2.88   |
| 1. | 1  | 2   | 149.88 | 6.50   |
| -  | 1  | 1   | -2     | 157.82 |
| -  | 1  | 1   | -2     | 144.66 |
| -  | 1  | -1  | -2     | 159.48 |
| 1. | -1 | 2   | 160.76 | 6.52   |

|    |    |     |     |        |      |
|----|----|-----|-----|--------|------|
| -  | 1  | -1  | -2  | 159.96 | 5.29 |
| -  | 1  | 1   | -3  | 61.06  | 2.21 |
| -  | 1  | 1   | -3  | 63.11  | 2.10 |
| 1. | 1  | 3   |     | 61.93  | 2.59 |
| -  | 1  | -1  | -3  | 62.97  | 2.10 |
| -  | 1  | -1  | -3  | 62.66  | 2.21 |
| 1. | -1 | 3   |     | 59.22  | 2.59 |
| -  | 1  | 1   | -4  | 9.26   | 0.34 |
| -  | 1  | 1   | -4  | 8.49   | 0.35 |
| -  | 1  | -1  | -4  | 9.01   | 0.34 |
| -  | 1  | -1  | -4  | 8.91   | 0.35 |
| 1. | 1  | 5   |     | 228.61 | 9.69 |
| -  | 1  | 1   | -5  | 227.64 | 8.25 |
| -  | 1  | 1   | -5  | 237.15 | 7.90 |
| -  | 1  | -1  | -5  | 231.01 | 7.87 |
| 1. | -1 | 5   |     | 231.60 | 9.69 |
| -  | 1  | 1   | -6  | 2.14   | 0.16 |
| -  | 1  | 1   | -6  | 2.58   | 0.18 |
| 1. | 1  | 6   |     | 2.36   | 0.23 |
| -  | 1  | -1  | -6  | 2.51   | 0.20 |
| 1. | -1 | 6   |     | 2.57   | 0.24 |
| -  | 1  | -1  | -6  | 2.10   | 0.17 |
| 1. | 1  | 7   |     | 15.89  | 0.74 |
| -  | 1  | 1   | -7  | 16.57  | 0.61 |
| -  | 1  | -1  | -7  | 16.25  | 0.62 |
| -  | 1  | -1  | -7  | 16.57  | 0.61 |
| 1. | -1 | 7   |     | 15.74  | 0.73 |
| 1. | 1  | 8   |     | 50.83  | 2.14 |
| -  | 1  | 1   | -8  | 49.68  | 1.75 |
| -  | 1  | -1  | -8  | 50.73  | 1.82 |
| -  | 1  | -1  | -8  | 50.09  | 1.75 |
| 1. | -1 | 8   |     | 49.86  | 2.14 |
| -  | 1  | 1   | -9  | 1.92   | 0.20 |
| 1. | 1  | 9   |     | 2.40   | 0.34 |
| 1. | -1 | 9   |     | 2.09   | 0.24 |
| -  | 1  | -1  | -9  | 1.95   | 0.21 |
| 1. | 1  | 10  |     | 4.87   | 0.39 |
| -  | 1  | 1   | -10 | 4.20   | 0.31 |
| -  | 1  | -1  | -10 | 4.07   | 0.35 |
| 1. | -1 | 10  |     | 4.41   | 0.41 |
| -  | 1  | 1   | -11 | 26.62  | 1.03 |
| 1. | 1  | 11  |     | 29.59  | 1.27 |
| -  | 1  | -1  | -11 | 27.19  | 1.04 |
| 1. | -1 | 11  |     | 27.91  | 1.28 |
| -  | 1  | 1   | -12 | 1.05   | 0.28 |
| 1. | -1 | 12  |     | 1.25   | 0.32 |
| -  | 1  | -1  | -12 | 1.23   | 0.25 |
| -  | 1  | 1   | -13 | 0.26   | 0.30 |
| 1. | -1 | 13  |     | 0.53   | 0.36 |
| -  | 1  | -1  | -13 | 0.17   | 0.29 |
| -  | 1  | 1   | -14 | 0.02   | 0.32 |
| -  | 1  | -1  | -14 | 0.24   | 0.30 |
| 1. | 2  | -14 |     | 3.68   | 0.38 |
| 1. | -2 | -14 |     | 3.94   | 0.38 |

|    |    |     |        |        |
|----|----|-----|--------|--------|
| 1. | 2  | -13 | 0.15   | 0.28   |
| 1. | -2 | -13 | -0.40  | 0.28   |
| -  | 1  | -2  | 13     | 0.32   |
| 1. | 2  | -12 | 0.43   | 0.25   |
| -  | 1  | -2  | 12     | 0.53   |
| 1. | -2 | -12 | 0.09   | 0.25   |
| 1. | 2  | -11 | 0.91   | 0.24   |
| -  | 1  | -2  | 11     | 0.86   |
| 1. | -2 | -11 | 0.89   | 0.22   |
| -  | 1  | 2   | 10     | 8.84   |
| 1. | 2  | -10 | 9.17   | 0.46   |
| -  | 1  | -2  | 10     | 8.79   |
| 1. | -2 | -10 | 8.68   | 0.42   |
| 1. | 2  | -9  | 5.82   | 0.33   |
| -  | 1  | 2   | 9      | 5.94   |
| 1. | -2 | -9  | 6.10   | 0.35   |
| -  | 1  | -2  | 9      | 5.85   |
| -  | 1  | 2   | 8      | 19.39  |
| 1. | -2 | -8  | 19.65  | 0.73   |
| 1. | -2 | -8  | 19.43  | 0.73   |
| -  | 1  | -2  | 8      | 19.64  |
| -  | 1  | 2   | 7      | 17.85  |
| -  | 1  | -2  | 7      | 17.22  |
| 1. | -2 | -7  | 18.08  | 0.66   |
| 1. | 2  | -6  | 122.63 | 4.86   |
| 1. | 2  | -6  | 111.56 | 4.12   |
| 1. | 2  | -6  | 115.77 | 3.95   |
| 1. | -2 | -6  | 114.66 | 3.95   |
| -  | 1  | 2   | 5      | 1.16   |
| 1. | 2  | -5  | 1.00   | 0.12   |
| 1. | 2  | -5  | 1.05   | 0.10   |
| 1. | -2 | -5  | 1.06   | 0.10   |
| 1. | -2 | -5  | 1.27   | 0.12   |
| -  | 1  | 2   | 4      | 15.61  |
| 1. | 2  | -4  | 15.89  | 0.68   |
| 1. | -2 | -4  | 15.34  | 0.55   |
| 1. | 2  | -3  | 3.16   | 0.14   |
| 1. | 2  | -3  | 3.12   | 0.17   |
| 1. | -2 | -3  | 2.90   | 0.14   |
| 1. | 2  | -2  | 19.06  | 0.68   |
| 1. | -2 | -2  | 20.58  | 0.82   |
| -  | 1  | -2  | 2      | 19.51  |
| 1. | 2  | -1  | 142.59 | 4.59   |
| 1. | 2  | -1  | 143.96 | 5.67   |
| -  | 1  | 2   | 1      | 121.79 |
| -  | 1  | -2  | 1      | 145.86 |
| 1. | -2 | -1  | 121.02 | 5.63   |
| -  | 1  | 2   | 0      | 64.90  |
| 1. | 2  | 0   | 64.24  | 2.69   |
| 1. | -2 | 0   | 65.88  | 2.69   |
| -  | 1  | -2  | 0      | 59.54  |
| 1. | 2  | 1   | 8.77   | 0.43   |
| -  | 1  | 2   | -1     | 10.58  |
| -  | 1  | -2  | -1     | 10.18  |

|    |    |    |     |        |      |
|----|----|----|-----|--------|------|
| -  | 1  | -2 | -1  | 10.50  | 0.37 |
| 1. | -2 | 1  |     | 10.30  | 0.43 |
| 1. | 2  | 2  |     | 4.47   | 0.24 |
| -  | 1  | 2  | -2  | 5.45   | 0.20 |
| -  | 1  | -2 | -2  | 5.13   | 0.19 |
| -  | 1  | -2 | -2  | 5.26   | 0.20 |
| -  | 1  | 2  | -3  | 0.20   | 0.05 |
| 1. | 2  | 3  |     | 0.33   | 0.07 |
| -  | 1  | -2 | -3  | 0.30   | 0.06 |
| -  | 1  | -2 | -3  | 0.32   | 0.06 |
| 1. | 2  | 4  |     | 19.12  | 0.89 |
| -  | 1  | 2  | -4  | 20.12  | 0.76 |
| -  | 1  | 2  | -4  | 21.29  | 0.73 |
| -  | 1  | -2 | -4  | 22.10  | 0.73 |
| 1. | -2 | 4  |     | 21.84  | 0.90 |
| -  | 1  | 2  | -5  | 38.51  | 1.48 |
| -  | 1  | 2  | -5  | 42.35  | 1.42 |
| 1. | -2 | 5  |     | 41.88  | 1.75 |
| -  | 1  | -2 | -5  | 42.32  | 1.42 |
| -  | 1  | 2  | -6  | 44.81  | 1.79 |
| 1. | 2  | 6  |     | 50.96  | 2.10 |
| -  | 1  | 2  | -6  | 50.89  | 1.72 |
| -  | 1  | -2 | -6  | 50.45  | 1.71 |
| 1. | -2 | 6  |     | 50.57  | 2.11 |
| -  | 1  | -2 | -6  | 51.44  | 1.79 |
| -  | 1  | 2  | -7  | 0.02   | 0.12 |
| 1. | 2  | 7  |     | 0.20   | 0.15 |
| -  | 1  | 2  | -7  | 0.06   | 0.06 |
| -  | 1  | -2 | -7  | 0.06   | 0.12 |
| 1. | -2 | 7  |     | 0.24   | 0.17 |
| -  | 1  | -2 | -7  | 0.05   | 0.11 |
| 1. | 2  | 8  |     | 151.87 | 6.06 |
| -  | 1  | 2  | -8  | 141.13 | 4.94 |
| -  | 1  | -2 | -8  | 141.88 | 4.93 |
| 1. | -2 | 8  |     | 144.81 | 6.07 |
| -  | 1  | -2 | -8  | 145.36 | 5.17 |
| 1. | 2  | 9  |     | 0.56   | 0.20 |
| -  | 1  | 2  | -9  | 0.50   | 0.17 |
| 1. | -2 | 9  |     | 0.36   | 0.22 |
| -  | 1  | -2 | -9  | 0.38   | 0.18 |
| 1. | 2  | 10 |     | 7.34   | 0.45 |
| -  | 1  | 2  | -10 | 6.60   | 0.38 |
| 1. | -2 | 10 |     | 6.67   | 0.48 |
| -  | 1  | -2 | -10 | 6.96   | 0.40 |
| 1. | 2  | 11 |     | 5.09   | 0.42 |
| -  | 1  | 2  | -11 | 4.64   | 0.36 |
| -  | 1  | -2 | -11 | 4.74   | 0.39 |
| 1. | -2 | 11 |     | 4.74   | 0.46 |
| -  | 1  | 2  | -12 | 9.15   | 0.49 |
| -  | 1  | -2 | -12 | 8.56   | 0.48 |
| 1. | -2 | 12 |     | 9.76   | 0.60 |
| -  | 1  | 2  | -13 | 0.65   | 0.31 |
| 1. | -2 | 13 |     | 0.85   | 0.35 |
| -  | 1  | -2 | -13 | 0.49   | 0.29 |

|   |    |    |     |        |      |
|---|----|----|-----|--------|------|
| - | 1  | 2  | -14 | -0.08  | 0.30 |
| - | 1  | -2 | -14 | -0.54  | 0.31 |
|   | 1. | 3  | -14 | -0.25  | 0.32 |
| - | 1  | -3 | 14  | 0.40   | 0.34 |
|   | 1. | -3 | -14 | 0.26   | 0.32 |
|   | 1. | 3  | -13 | 6.14   | 0.44 |
| - | 1  | -3 | 13  | 6.58   | 0.54 |
|   | 1. | -3 | -13 | 6.11   | 0.47 |
|   | 1. | 3  | -12 | -0.12  | 0.25 |
| - | 1  | -3 | 12  | 0.06   | 0.29 |
|   | 1. | -3 | -12 | 0.20   | 0.26 |
|   | 1. | 3  | -11 | 1.70   | 0.23 |
| - | 1  | -3 | 11  | 1.54   | 0.28 |
|   | 1. | -3 | -11 | 1.64   | 0.25 |
|   | 1. | 3  | -10 | 0.20   | 0.21 |
| - | 1  | -3 | 10  | 0.05   | 0.22 |
|   | 1. | -3 | -10 | 0.05   | 0.20 |
| - | 1  | 3  | 9   | 51.89  | 2.15 |
|   | 1. | 3  | -9  | 50.38  | 1.78 |
| - | 1  | -3 | 9   | 50.85  | 2.17 |
|   | 1. | -3 | -9  | 49.69  | 1.77 |
| - | 1  | 3  | 8   | 25.50  | 1.10 |
| - | 1  | -3 | 8   | 25.57  | 1.13 |
|   | 1. | -3 | -8  | 25.64  | 0.93 |
|   | 1. | -3 | -8  | 25.30  | 0.95 |
|   | 1. | 3  | -7  | 24.36  | 0.90 |
| - | 1  | 3  | 7   | 25.28  | 1.09 |
|   | 1. | -3 | -7  | 25.41  | 0.90 |
|   | 1. | -3 | -7  | 26.12  | 0.93 |
|   | 1. | 3  | -6  | 34.23  | 1.36 |
|   | 1. | 3  | -6  | 33.37  | 1.12 |
|   | 1. | -3 | -6  | 26.50  | 1.15 |
|   | 1. | -3 | -6  | 33.48  | 1.12 |
|   | 1. | 3  | -5  | 177.14 | 6.22 |
| - | 1  | 3  | 5   | 180.59 | 7.60 |
|   | 1. | 3  | -5  | 185.96 | 7.65 |
|   | 1. | -3 | -5  | 183.61 | 6.22 |
|   | 1. | 3  | -4  | 89.90  | 3.57 |
|   | 1. | 3  | -4  | 77.32  | 2.90 |
| - | 1  | 3  | 4   | 88.11  | 3.57 |
|   | 1. | -3 | -4  | 86.72  | 2.91 |
|   | 1. | 3  | -3  | 2.84   | 0.13 |
| - | 1  | 3  | 3   | 2.84   | 0.14 |
|   | 1. | -3 | -3  | 3.00   | 0.15 |
|   | 1. | 3  | -2  | 121.99 | 5.61 |
|   | 1. | 3  | -2  | 141.10 | 4.56 |
|   | 1. | -3 | -2  | 137.83 | 4.58 |
|   | 1. | 3  | -1  | 43.46  | 1.80 |
|   | 1. | 3  | -1  | 43.02  | 1.46 |
|   | 1. | -3 | -1  | 43.29  | 1.80 |
|   | 1. | -3 | -1  | 41.96  | 1.47 |
| - | 1  | -3 | 1   | 43.76  | 1.53 |
| - | 1  | 3  | 0   | 4.67   | 0.18 |
|   | 1. | 3  | 0   | 4.75   | 0.21 |

|    |    |    |        |        |
|----|----|----|--------|--------|
| 1. | -3 | 0  | 4.72   | 0.21   |
| -  | 1  | -3 | 0      | 4.51   |
| 1. | 3  | 1  | 629.54 | 25.21  |
| -  | 1  | 3  | -1     | 592.45 |
| -  | 1  | 3  | -1     | 576.84 |
| -  | 1  | -3 | -1     | 524.95 |
| 1. | -3 | 1  | 656.24 | 25.63  |
| 1. | 3  | 2  | 38.44  | 1.73   |
| -  | 1  | 3  | -2     | 44.05  |
| 1. | -3 | 2  | 36.48  | 1.73   |
| -  | 1  | -3 | -2     | 43.10  |
| -  | 1  | -3 | -2     | 44.59  |
| 1. | 3  | 3  | 8.02   | 0.38   |
| -  | 1  | 3  | -3     | 8.93   |
| -  | 1  | -3 | -3     | 8.65   |
| -  | 1  | 3  | -4     | 33.86  |
| 1. | 3  | 4  | 32.59  | 1.41   |
| -  | 1  | -3 | -4     | 32.89  |
| 1. | -3 | 4  | 33.90  | 1.41   |
| -  | 1  | 3  | -5     | 50.63  |
| -  | 1  | -3 | -5     | 51.70  |
| -  | 1  | -3 | -5     | 50.22  |
| 1. | -3 | 5  | 50.26  | 2.14   |
| 1. | 3  | 6  | 42.99  | 1.83   |
| -  | 1  | 3  | -6     | 42.58  |
| -  | 1  | 3  | -6     | 43.19  |
| 1. | -3 | 6  | 43.53  | 1.85   |
| -  | 1  | -3 | -6     | 44.20  |
| -  | 1  | -3 | -6     | 44.07  |
| -  | 1  | 3  | -7     | 33.46  |
| 1. | 3  | 7  | 38.79  | 1.58   |
| -  | 1  | -3 | -7     | 37.96  |
| -  | 1  | -3 | -7     | 37.18  |
| 1. | -3 | 7  | 37.44  | 1.59   |
| 1. | 3  | 8  | 0.42   | 0.17   |
| -  | 1  | 3  | -8     | 0.41   |
| 1. | -3 | 8  | 0.78   | 0.21   |
| -  | 1  | -3 | -8     | 0.62   |
| -  | 1  | -3 | -8     | 0.50   |
| 1. | 3  | 9  | 1.43   | 0.22   |
| -  | 1  | 3  | -9     | 1.33   |
| -  | 1  | -3 | -9     | 1.38   |
| 1. | -3 | 9  | 1.01   | 0.22   |
| -  | 1  | -3 | -9     | 1.36   |
| -  | 1  | 3  | -10    | 4.93   |
| 1. | 3  | 10 | 4.72   | 0.38   |
| 1. | -3 | 10 | 5.00   | 0.44   |
| -  | 1  | -3 | -10    | 4.64   |
| -  | 1  | 3  | -11    | 16.23  |
| 1. | -3 | 11 | 16.31  | 0.82   |
| -  | 1  | -3 | -11    | 15.86  |
| -  | 1  | 3  | -12    | 1.33   |
| -  | 1  | -3 | -12    | 1.28   |
| 1. | -3 | 12 | 1.00   | 0.32   |

|   |    |    |     |       |      |
|---|----|----|-----|-------|------|
| - | 1  | 3  | -13 | 2.87  | 0.35 |
| - | 1  | -3 | -13 | 2.75  | 0.33 |
|   | 1. | -3 | 13  | 3.50  | 0.48 |
| - | 1  | 3  | -14 | 0.22  | 0.31 |
| - | 1  | -3 | -14 | -0.09 | 0.32 |
|   | 1. | -3 | 14  | 0.14  | 0.38 |
|   | 1. | 4  | -14 | 1.04  | 0.34 |
| - | 1  | -4 | 14  | 0.65  | 0.36 |
|   | 1. | -4 | -14 | 0.38  | 0.30 |
|   | 1. | 4  | -13 | 0.83  | 0.30 |
|   | 1. | -4 | -13 | 0.20  | 0.28 |
| - | 1  | -4 | 13  | 0.71  | 0.33 |
|   | 1. | 4  | -12 | 7.95  | 0.48 |
|   | 1. | -4 | -12 | 7.21  | 0.48 |
| - | 1  | -4 | 12  | 7.80  | 0.54 |
|   | 1. | 4  | -11 | 32.89 | 1.19 |
|   | 1. | -4 | -11 | 31.84 | 1.17 |
| - | 1  | -4 | 11  | 31.69 | 1.44 |
|   | 1. | 4  | -10 | 22.02 | 0.84 |
| - | 1  | -4 | 10  | 22.17 | 1.03 |
|   | 1. | -4 | -10 | 22.77 | 0.84 |
|   | 1. | 4  | -9  | 1.29  | 0.20 |
|   | 1. | -4 | -9  | 1.18  | 0.16 |
| - | 1  | -4 | 9   | 1.07  | 0.23 |
|   | 1. | -4 | -9  | 1.27  | 0.20 |
| - | 1  | 4  | 8   | 1.54  | 0.16 |
|   | 1. | 4  | -8  | 1.48  | 0.17 |
|   | 1. | -4 | -8  | 1.21  | 0.17 |
|   | 1. | -4 | -8  | 1.32  | 0.15 |
| - | 1  | -4 | 8   | 1.23  | 0.20 |
|   | 1. | 4  | -7  | 3.61  | 0.25 |
|   | 1. | -4 | -7  | 3.38  | 0.23 |
|   | 1. | -4 | -7  | 2.93  | 0.23 |
|   | 1. | 4  | -6  | 21.10 | 0.77 |
| - | 1  | 4  | 6   | 20.50 | 0.91 |
|   | 1. | 4  | -6  | 21.22 | 0.94 |
|   | 1. | -4 | -6  | 21.43 | 0.77 |
|   | 1. | -4 | -6  | 21.95 | 0.79 |
| - | 1  | 4  | 5   | 43.94 | 1.90 |
|   | 1. | 4  | -5  | 44.47 | 1.56 |
|   | 1. | 4  | -5  | 47.20 | 1.92 |
|   | 1. | -4 | -5  | 46.28 | 1.63 |
|   | 1. | -4 | -5  | 44.96 | 1.56 |
|   | 1. | 4  | -4  | 4.56  | 0.20 |
| - | 1  | 4  | 4   | 4.32  | 0.21 |
|   | 1. | -4 | -4  | 4.79  | 0.21 |
|   | 1. | 4  | -3  | 29.85 | 1.17 |
|   | 1. | -4 | -3  | 38.38 | 1.17 |
|   | 1. | 4  | -2  | 50.84 | 1.73 |
|   | 1. | 4  | -2  | 51.15 | 2.13 |
|   | 1. | -4 | -2  | 50.62 | 1.73 |
|   | 1. | 4  | -1  | 8.44  | 0.29 |
|   | 1. | 4  | -1  | 8.17  | 0.37 |
|   | 1. | -4 | -1  | 8.16  | 0.30 |

|    |    |    |        |        |
|----|----|----|--------|--------|
| 1. | -4 | -1 | 8.21   | 0.35   |
| 1. | 4  | 0  | 78.31  | 3.37   |
| -  | 1  | 4  | 0      | 81.17  |
| -  | 1  | -4 | 0      | 81.06  |
| 1. | -4 | 0  | 81.22  | 3.37   |
| -  | 1  | 4  | -1     | 130.38 |
| -  | 1  | 4  | -1     | 129.88 |
| 1. | 4  | 1  | 125.55 | 5.38   |
| -  | 1  | -4 | -1     | 124.50 |
| 1. | -4 | 1  | 131.66 | 5.39   |
| 1. | 4  | 2  | 105.80 | 4.54   |
| -  | 1  | 4  | -2     | 109.90 |
| -  | 1  | -4 | -2     | 106.15 |
| 1. | -4 | 2  | 112.51 | 4.54   |
| -  | 1  | 4  | -3     | 20.36  |
| -  | 1  | -4 | -3     | 24.31  |
| 1. | -4 | 3  | 26.63  | 1.01   |
| -  | 1  | 4  | -4     | 14.24  |
| 1. | 4  | 4  | 13.98  | 0.63   |
| -  | 1  | -4 | -4     | 13.99  |
| -  | 1  | -4 | -4     | 14.42  |
| -  | 1  | 4  | -5     | 46.26  |
| 1. | -4 | 5  | 47.40  | 2.00   |
| -  | 1  | -4 | -5     | 47.87  |
| -  | 1  | -4 | -5     | 47.72  |
| 1. | 4  | 6  | 0.55   | 0.13   |
| -  | 1  | 4  | -6     | 0.61   |
| 1. | -4 | 6  | 0.59   | 0.16   |
| -  | 1  | -4 | -6     | 0.45   |
| -  | 1  | -4 | -6     | 0.48   |
| -  | 1  | 4  | -7     | 8.57   |
| 1. | 4  | 7  | 8.89   | 0.44   |
| -  | 1  | -4 | -7     | 8.48   |
| 1. | -4 | 7  | 8.45   | 0.45   |
| -  | 1  | -4 | -7     | 8.45   |
| 1. | 4  | 8  | 14.10  | 0.66   |
| -  | 1  | 4  | -8     | 13.53  |
| -  | 1  | -4 | -8     | 13.52  |
| 1. | -4 | 8  | 14.08  | 0.69   |
| -  | 1  | -4 | -8     | 14.03  |
| 1. | 4  | 9  | 1.56   | 0.22   |
| -  | 1  | 4  | -9     | 1.70   |
| -  | 1  | -4 | -9     | 1.64   |
| 1. | -4 | 9  | 1.66   | 0.26   |
| -  | 1  | -4 | -9     | 1.68   |
| -  | 1  | 4  | -10    | 0.59   |
| -  | 1  | -4 | -10    | 0.59   |
| 1. | -4 | 10 | 0.41   | 0.27   |
| -  | 1  | 4  | -11    | 0.19   |
| 1. | -4 | 11 | 0.68   | 0.30   |
| -  | 1  | -4 | -11    | 0.47   |
| -  | 1  | 4  | -12    | 11.61  |
| 1. | -4 | 12 | 11.30  | 0.68   |
| -  | 1  | -4 | -12    | 10.71  |

|   |    |    |     |        |      |
|---|----|----|-----|--------|------|
| - | 1  | 4  | -13 | 8.10   | 0.50 |
| - | 1  | -4 | -13 | 8.27   | 0.48 |
|   | 1. | -4 | 13  | 8.57   | 0.61 |
| - | 1  | 4  | -14 | 0.64   | 0.32 |
|   | 1. | -4 | 14  | 1.20   | 0.40 |
| - | 1  | -4 | -14 | 0.40   | 0.33 |
| - | 1  | -5 | 15  | 0.50   | 0.40 |
|   | 1. | 5  | -14 | 1.48   | 0.35 |
| - | 1  | -5 | 14  | 1.80   | 0.39 |
|   | 1. | -5 | -14 | 1.03   | 0.31 |
|   | 1. | 5  | -13 | 0.69   | 0.31 |
|   | 1. | -5 | -13 | 0.57   | 0.30 |
| - | 1  | -5 | 13  | 0.75   | 0.33 |
|   | 1. | 5  | -12 | 9.53   | 0.53 |
| - | 1  | -5 | 12  | 9.49   | 0.61 |
|   | 1. | -5 | -12 | 9.09   | 0.52 |
|   | 1. | 5  | -11 | -0.22  | 0.22 |
| - | 1  | -5 | 11  | 0.12   | 0.27 |
|   | 1. | -5 | -11 | -0.17  | 0.23 |
|   | 1. | 5  | -10 | 4.81   | 0.34 |
|   | 1. | -5 | -10 | 4.28   | 0.36 |
| - | 1  | -5 | 10  | 4.45   | 0.42 |
|   | 1. | 5  | -9  | 5.14   | 0.35 |
|   | 1. | -5 | -9  | 4.85   | 0.32 |
| - | 1  | -5 | 9   | 4.41   | 0.40 |
|   | 1. | -5 | -9  | 5.09   | 0.34 |
|   | 1. | 5  | -8  | 8.37   | 0.41 |
| - | 1  | -5 | 8   | 8.42   | 0.47 |
|   | 1. | -5 | -8  | 8.59   | 0.41 |
|   | 1. | -5 | -8  | 8.70   | 0.40 |
|   | 1. | 5  | -7  | 13.04  | 0.62 |
|   | 1. | 5  | -7  | 12.35  | 0.51 |
|   | 1. | -5 | -7  | 12.97  | 0.52 |
|   | 1. | -5 | -7  | 12.98  | 0.52 |
|   | 1. | 5  | -6  | 43.22  | 1.50 |
|   | 1. | 5  | -6  | 44.36  | 1.85 |
| - | 1  | 5  | 6   | 41.72  | 1.82 |
|   | 1. | -5 | -6  | 43.29  | 1.50 |
|   | 1. | -5 | -6  | 43.94  | 1.57 |
| - | 1  | 5  | 5   | 154.01 | 6.19 |
|   | 1. | 5  | -5  | 132.88 | 6.22 |
|   | 1. | 5  | -5  | 151.24 | 5.06 |
|   | 1. | -5 | -5  | 155.26 | 5.06 |
|   | 1. | 5  | -4  | 99.94  | 3.30 |
| - | 1  | 5  | 4   | 93.75  | 4.04 |
|   | 1. | -5 | -4  | 97.50  | 3.30 |
|   | 1. | 5  | -3  | 111.37 | 4.95 |
|   | 1. | -5 | -3  | 123.49 | 3.99 |
|   | 1. | 5  | -2  | 8.45   | 0.31 |
|   | 1. | -5 | -2  | 8.30   | 0.32 |
| - | 1  | 5  | 1   | 8.23   | 0.35 |
|   | 1. | 5  | -1  | 7.80   | 0.36 |
|   | 1. | 5  | -1  | 8.36   | 0.29 |
|   | 1. | -5 | -1  | 7.67   | 0.30 |

|    |    |    |        |        |
|----|----|----|--------|--------|
| 1. | 5  | 0  | 101.27 | 4.29   |
| -  | 1  | 5  | 0      | 100.92 |
| -  | 1  | 5  | 0      | 105.48 |
| -  | 1  | 5  | -1     | 1.52   |
| 1. | 5  | 1  | 2.27   | 0.13   |
| -  | 1  | 5  | -1     | 1.99   |
| -  | 1  | -5 | -1     | 2.03   |
| -  | 1  | 5  | -2     | 149.21 |
| 1. | 5  | 2  | 146.39 | 6.30   |
| 1. | -5 | 2  | 148.97 | 6.10   |
| -  | 1  | -5 | -2     | 134.82 |
| -  | 1  | 5  | -3     | 0.55   |
| 1. | 5  | 3  | 0.64   | 0.09   |
| 1. | -5 | 3  | 0.56   | 0.11   |
| -  | 1  | -5 | -3     | 0.53   |
| 1. | 5  | 4  | 0.39   | 0.11   |
| -  | 1  | 5  | -4     | 0.69   |
| -  | 1  | 5  | -4     | 0.56   |
| -  | 1  | -5 | -4     | 0.70   |
| -  | 1  | -5 | -4     | 0.59   |
| -  | 1  | 5  | -5     | 57.10  |
| -  | 1  | 5  | -5     | 55.55  |
| 1. | -5 | 5  | 51.67  | 2.36   |
| -  | 1  | -5 | -5     | 58.57  |
| -  | 1  | -5 | -5     | 56.79  |
| -  | 1  | 5  | -6     | 42.84  |
| 1. | 5  | 6  | 41.91  | 1.84   |
| -  | 1  | -5 | -6     | 44.71  |
| 1. | -5 | 6  | 43.97  | 1.86   |
| -  | 1  | -5 | -6     | 44.85  |
| 1. | 5  | 7  | 1.67   | 0.23   |
| 1. | -5 | 7  | 1.58   | 0.20   |
| -  | 1  | -5 | -7     | 1.88   |
| -  | 1  | -5 | -7     | 1.60   |
| 1. | 5  | 8  | 5.23   | 0.34   |
| -  | 1  | 5  | -8     | 5.09   |
| -  | 1  | -5 | -8     | 5.17   |
| -  | 1  | -5 | -8     | 4.79   |
| 1. | -5 | 8  | 4.92   | 0.40   |
| -  | 1  | 5  | -9     | 0.79   |
| -  | 1  | -5 | -9     | 0.88   |
| 1. | -5 | 9  | 0.93   | 0.26   |
| -  | 1  | -5 | -9     | 0.86   |
| -  | 1  | 5  | -10    | 3.26   |
| 1. | -5 | 10 | 3.92   | 0.42   |
| -  | 1  | -5 | -10    | 2.96   |
| -  | 1  | 5  | -11    | 2.28   |
| 1. | -5 | 11 | 2.04   | 0.33   |
| -  | 1  | -5 | -11    | 2.09   |
| -  | 1  | 5  | -12    | 1.64   |
| -  | 1  | -5 | -12    | 1.37   |
| 1. | -5 | 12 | 1.20   | 0.31   |
| -  | 1  | 5  | -13    | 0.27   |
| -  | 1  | -5 | -13    | -0.03  |

|    |    |        |        |      |
|----|----|--------|--------|------|
| 1. | -5 | 13     | 0.20   | 0.36 |
| -  | 1  | 5 -14  | 3.58   | 0.38 |
| 1. | -5 | 14     | 4.15   | 0.57 |
| -  | 1  | -5 -14 | 3.62   | 0.38 |
| 1. | 6  | -14    | 4.44   | 0.51 |
| -  | 1  | -6 14  | 4.39   | 0.57 |
| 1. | -6 | -14    | 3.75   | 0.38 |
| 1. | 6  | -13    | -0.02  | 0.31 |
| -  | 1  | -6 13  | 0.08   | 0.34 |
| 1. | -6 | -13    | 0.12   | 0.30 |
| 1. | 6  | -12    | 2.26   | 0.29 |
| 1. | -6 | -12    | 2.14   | 0.30 |
| -  | 1  | -6 12  | 2.33   | 0.35 |
| 1. | 6  | -11    | 12.04  | 0.55 |
| 1. | -6 | -11    | 11.75  | 0.53 |
| -  | 1  | -6 11  | 11.83  | 0.65 |
| 1. | 6  | -10    | 5.01   | 0.39 |
| 1. | -6 | -10    | 4.97   | 0.37 |
| -  | 1  | -6 10  | 5.49   | 0.45 |
| 1. | 6  | -9     | 3.60   | 0.33 |
| -  | 1  | -6 9   | 3.13   | 0.38 |
| 1. | -6 | -9     | 3.21   | 0.31 |
| 1. | -6 | -9     | 3.53   | 0.31 |
| 1. | 6  | -8     | 0.05   | 0.16 |
| 1. | -6 | -8     | -0.06  | 0.17 |
| 1. | -6 | -8     | 0.01   | 0.15 |
| -  | 1  | -6 8   | -0.12  | 0.21 |
| 1. | 6  | -7     | 31.94  | 1.39 |
| 1. | 6  | -7     | 31.20  | 1.13 |
| 1. | -6 | -7     | 32.61  | 1.18 |
| 1. | -6 | -7     | 31.86  | 1.13 |
| 1. | 6  | -6     | 49.67  | 1.79 |
| -  | 1  | 6 6    | 54.68  | 2.17 |
| 1. | -6 | -6     | 52.08  | 1.87 |
| 1. | -6 | -6     | 50.90  | 1.79 |
| -  | 1  | 6 5    | 14.19  | 0.60 |
| 1. | 6  | -5     | 13.41  | 0.52 |
| 1. | -6 | -5     | 13.83  | 0.52 |
| 1. | 6  | -4     | 18.97  | 0.83 |
| 1. | 6  | -4     | 19.31  | 0.68 |
| 1. | -6 | -4     | 18.79  | 0.68 |
| 1. | 6  | -3     | 17.81  | 0.73 |
| 1. | 6  | -3     | 22.89  | 0.91 |
| 1. | -6 | -3     | 21.82  | 0.73 |
| -  | 1  | 6 2    | 105.95 | 4.17 |
| 1. | 6  | -2     | 95.09  | 3.40 |
| 1. | -6 | -2     | 99.58  | 3.40 |
| -  | 1  | 6 1    | 131.18 | 5.08 |
| 1. | 6  | -1     | 110.45 | 5.10 |
| 1. | -6 | -1     | 122.68 | 4.12 |
| 1. | 6  | 0      | 44.52  | 1.85 |
| -  | 1  | 6 0    | 44.03  | 1.84 |
| -  | 1  | -6 0   | 43.39  | 1.50 |
| 1. | 6  | 1      | 11.50  | 0.48 |

|   |    |    |     |       |      |
|---|----|----|-----|-------|------|
| - | 1  | 6  | -1  | 10.88 | 0.49 |
| - | 1  | -6 | -1  | 10.48 | 0.42 |
| - | 1  | -6 | -1  | 11.24 | 0.39 |
| - | 1  | 6  | -2  | 0.74  | 0.08 |
| - | 1  | 6  | -2  | 0.62  | 0.08 |
| - | 1  | -6 | -2  | 0.52  | 0.07 |
| - | 1  | 6  | -3  | 12.01 | 0.47 |
| - | 1  | 6  | -3  | 12.86 | 0.47 |
|   | 1. | 6  | 3   | 13.19 | 0.56 |
| - | 1  | -6 | -3  | 12.57 | 0.49 |
|   | 1. | -6 | 3   | 12.81 | 0.57 |
| - | 1  | -6 | -3  | 12.20 | 0.46 |
| - | 1  | 6  | -4  | 8.28  | 0.33 |
|   | 1. | 6  | 4   | 7.37  | 0.40 |
| - | 1  | 6  | -4  | 8.15  | 0.33 |
| - | 1  | -6 | -4  | 8.66  | 0.35 |
| - | 1  | -6 | -4  | 8.45  | 0.32 |
|   | 1. | -6 | 4   | 8.49  | 0.42 |
|   | 1. | 6  | 5   | 7.70  | 0.39 |
| - | 1  | 6  | -5  | 6.99  | 0.31 |
| - | 1  | 6  | -5  | 8.19  | 0.35 |
| - | 1  | -6 | -5  | 7.92  | 0.33 |
| - | 1  | -6 | -5  | 7.95  | 0.36 |
| - | 1  | 6  | -6  | 11.70 | 0.48 |
|   | 1. | 6  | 6   | 11.41 | 0.58 |
| - | 1  | -6 | -6  | 14.00 | 0.49 |
| - | 1  | -6 | -6  | 14.37 | 0.53 |
|   | 1. | 6  | 7   | 27.87 | 1.12 |
|   | 1. | -6 | 7   | 25.07 | 1.15 |
| - | 1  | -6 | -7  | 24.59 | 0.92 |
| - | 1  | -6 | -7  | 25.21 | 0.97 |
| - | 1  | 6  | -8  | 13.84 | 0.58 |
| - | 1  | -6 | -8  | 13.89 | 0.56 |
| - | 1  | -6 | -8  | 14.52 | 0.59 |
|   | 1. | -6 | 8   | 13.61 | 0.70 |
| - | 1  | 6  | -9  | 25.45 | 0.92 |
| - | 1  | -6 | -9  | 23.62 | 0.90 |
|   | 1. | -6 | 9   | 24.77 | 1.14 |
| - | 1  | -6 | -9  | 25.16 | 0.96 |
| - | 1  | 6  | -10 | 1.22  | 0.25 |
| - | 1  | -6 | -10 | 1.02  | 0.22 |
|   | 1. | -6 | 10  | 1.13  | 0.29 |
| - | 1  | -6 | -10 | 1.18  | 0.22 |
| - | 1  | 6  | -11 | 0.76  | 0.27 |
|   | 1. | -6 | 11  | 0.65  | 0.32 |
| - | 1  | -6 | -11 | 0.64  | 0.24 |
| - | 1  | 6  | -12 | -0.04 | 0.26 |
|   | 1. | -6 | 12  | 0.39  | 0.34 |
| - | 1  | -6 | -12 | -0.01 | 0.26 |
| - | 1  | 6  | -13 | 6.84  | 0.49 |
| - | 1  | -6 | -13 | 7.33  | 0.50 |
|   | 1. | -6 | 13  | 8.20  | 0.62 |
| - | 1  | -6 | -14 | 1.47  | 0.36 |
|   | 1. | -6 | 14  | 1.80  | 0.43 |

|    |    |     |        |        |
|----|----|-----|--------|--------|
| 1. | 7  | -14 | 2.04   | 0.38   |
| -  | 1  | -7  | 14     | 2.19   |
| 1. | -7 | -14 | 1.85   | 0.35   |
| 1. | 7  | -13 | 1.43   | 0.33   |
| 1. | -7 | -13 | 0.88   | 0.31   |
| -  | 1  | -7  | 13     | 1.67   |
| 1. | 7  | -12 | 4.92   | 0.45   |
| -  | 1  | -7  | 12     | 4.52   |
| 1. | -7 | -12 | 4.05   | 0.41   |
| 1. | 7  | -11 | 1.44   | 0.25   |
| 1. | -7 | -11 | 0.85   | 0.26   |
| -  | 1  | -7  | 11     | 0.98   |
| 1. | 7  | -10 | 3.22   | 0.36   |
| -  | 1  | -7  | 10     | 2.87   |
| 1. | -7 | -10 | 2.76   | 0.26   |
| 1. | -7 | -10 | 2.69   | 0.24   |
| 1. | 7  | -9  | 1.42   | 0.21   |
| 1. | -7 | -9  | 1.11   | 0.21   |
| -  | 1  | -7  | 9      | 1.25   |
| 1. | -7 | -9  | 1.24   | 0.20   |
| 1. | 7  | -8  | 31.66  | 1.18   |
| 1. | -7 | -8  | 32.86  | 1.17   |
| 1. | -7 | -8  | 33.41  | 1.22   |
| 1. | 7  | -7  | 17.86  | 0.69   |
| 1. | -7 | -7  | 18.62  | 0.70   |
| 1. | -7 | -7  | 18.76  | 0.72   |
| 1. | 7  | -6  | 10.88  | 0.45   |
| 1. | -7 | -6  | 10.91  | 0.45   |
| 1. | -7 | -6  | 10.25  | 0.46   |
| 1. | 7  | -5  | 0.04   | 0.15   |
| 1. | 7  | -5  | 0.25   | 0.12   |
| 1. | -7 | -5  | -0.02  | 0.12   |
| 1. | 7  | -4  | 29.46  | 1.27   |
| 1. | 7  | -4  | 29.31  | 1.03   |
| 1. | -7 | -4  | 29.42  | 1.03   |
| 1. | 7  | -3  | 0.26   | 0.09   |
| 1. | 7  | -3  | 0.33   | 0.12   |
| 1. | -7 | -3  | 0.24   | 0.10   |
| -  | 1  | 7   | 2      | 33.21  |
| 1. | 7  | -2  | 33.52  | 1.39   |
| 1. | -7 | -2  | 31.55  | 1.13   |
| -  | 1  | 7   | 1      | 101.70 |
| 1. | -7 | -1  | 97.51  | 3.38   |
| 1. | 7  | 0   | 3.88   | 0.21   |
| -  | 1  | 7   | 0      | 3.83   |
| -  | 1  | -7  | 0      | 3.77   |
| -  | 1  | 7   | -1     | 115.51 |
| 1. | 7  | 1   | 127.29 | 5.18   |
| -  | 1  | -7  | -1     | 122.41 |
| -  | 1  | -7  | -1     | 130.14 |
| -  | 1  | 7   | -2     | 11.46  |
| -  | 1  | 7   | -2     | 11.22  |
| 1. | 7  | 2   | 11.68  | 0.50   |
| -  | 1  | -7  | -2     | 10.84  |

|   |    |    |     |       |      |
|---|----|----|-----|-------|------|
| - | 1  | 7  | -3  | 20.98 | 0.75 |
|   | 1. | 7  | 3   | 22.15 | 0.91 |
|   | 1. | -7 | 3   | 21.26 | 0.92 |
| - | 1  | -7 | -3  | 20.29 | 0.74 |
| - | 1  | -7 | -3  | 21.38 | 0.79 |
| - | 1  | 7  | -4  | 35.90 | 1.25 |
|   | 1. | 7  | 4   | 35.41 | 1.51 |
| - | 1  | -7 | -4  | 34.82 | 1.23 |
|   | 1. | -7 | 4   | 35.96 | 1.53 |
| - | 1  | -7 | -4  | 36.34 | 1.30 |
| - | 1  | 7  | -5  | 15.59 | 0.58 |
|   | 1. | 7  | 5   | 15.71 | 0.68 |
| - | 1  | -7 | -5  | 15.74 | 0.56 |
|   | 1. | -7 | 5   | 14.21 | 0.70 |
| - | 1  | -7 | -5  | 15.44 | 0.61 |
| - | 1  | 7  | -6  | 81.10 | 2.79 |
| - | 1  | -7 | -6  | 80.15 | 2.78 |
| - | 1  | -7 | -6  | 83.32 | 2.93 |
| - | 1  | 7  | -7  | 0.85  | 0.17 |
|   | 1. | -7 | 7   | 0.76  | 0.22 |
| - | 1  | -7 | -7  | 0.75  | 0.17 |
| - | 1  | -7 | -7  | 0.62  | 0.15 |
| - | 1  | 7  | -8  | -0.01 | 0.18 |
|   | 1. | -7 | 8   | 0.20  | 0.23 |
| - | 1  | -7 | -8  | 0.22  | 0.17 |
| - | 1  | -7 | -8  | 0.22  | 0.17 |
| - | 1  | 7  | -9  | -0.02 | 0.20 |
|   | 1. | -7 | 9   | 0.29  | 0.26 |
| - | 1  | -7 | -9  | -0.05 | 0.19 |
| - | 1  | -7 | -9  | 0.20  | 0.19 |
| - | 1  | 7  | -10 | 22.91 | 0.89 |
|   | 1. | -7 | 10  | 22.81 | 1.09 |
| - | 1  | -7 | -10 | 23.44 | 0.93 |
| - | 1  | -7 | -10 | 23.02 | 0.88 |
| - | 1  | 7  | -11 | -0.01 | 0.27 |
| - | 1  | -7 | -11 | 0.12  | 0.24 |
|   | 1. | -7 | 11  | 0.10  | 0.32 |
| - | 1  | 7  | -12 | 0.91  | 0.31 |
| - | 1  | -7 | -12 | 0.36  | 0.27 |
|   | 1. | -7 | 12  | 0.64  | 0.36 |
| - | 1  | 7  | -13 | 0.84  | 0.34 |
|   | 1. | -7 | 13  | 0.75  | 0.39 |
| - | 1  | -7 | -13 | 0.28  | 0.30 |
| - | 1  | -7 | -14 | 3.28  | 0.38 |
| - | 1  | -8 | 14  | 0.99  | 0.43 |
|   | 1. | -8 | -14 | 0.46  | 0.33 |
|   | 1. | 8  | -13 | 1.21  | 0.34 |
|   | 1. | -8 | -13 | 0.63  | 0.31 |
| - | 1  | -8 | 13  | 0.83  | 0.38 |
|   | 1. | 8  | -12 | 0.29  | 0.27 |
|   | 1. | -8 | -12 | -0.34 | 0.26 |
| - | 1  | -8 | 12  | -0.20 | 0.34 |
|   | 1. | 8  | -11 | 15.19 | 0.67 |
|   | 1. | -8 | -11 | 14.35 | 0.65 |

|   |    |    |     |        |       |
|---|----|----|-----|--------|-------|
| - | 1  | -8 | 11  | 14.64  | 0.80  |
|   | 1. | 8  | -10 | 2.19   | 0.26  |
| - | 1  | -8 | 10  | 2.27   | 0.30  |
|   | 1. | -8 | -10 | 2.25   | 0.24  |
|   | 1. | -8 | -10 | 2.22   | 0.26  |
|   | 1. | 8  | -9  | 7.61   | 0.41  |
| - | 1  | -8 | 9   | 7.48   | 0.53  |
|   | 1. | -8 | -9  | 7.78   | 0.42  |
|   | 1. | -8 | -9  | 8.01   | 0.42  |
|   | 1. | 8  | -8  | 0.20   | 0.18  |
|   | 1. | -8 | -8  | -0.02  | 0.17  |
|   | 1. | -8 | -8  | 0.07   | 0.18  |
|   | 1. | 8  | -7  | 20.23  | 1.00  |
|   | 1. | 8  | -7  | 23.35  | 0.84  |
|   | 1. | -8 | -7  | 22.43  | 0.83  |
|   | 1. | -8 | -7  | 24.02  | 0.87  |
|   | 1. | 8  | -6  | 1.00   | 0.16  |
|   | 1. | -8 | -6  | 0.74   | 0.15  |
|   | 1. | -8 | -6  | 0.85   | 0.16  |
|   | 1. | 8  | -5  | 1.31   | 0.18  |
|   | 1. | 8  | -5  | 1.36   | 0.15  |
|   | 1. | -8 | -5  | 1.35   | 0.15  |
|   | 1. | 8  | -4  | 0.01   | 0.14  |
|   | 1. | 8  | -4  | -0.07  | 0.11  |
|   | 1. | -8 | -4  | 0.09   | 0.10  |
|   | 1. | 8  | -3  | 0.37   | 0.13  |
|   | 1. | 8  | -3  | 0.36   | 0.10  |
|   | 1. | -8 | -3  | 0.10   | 0.10  |
|   | 1. | 8  | -2  | 1.81   | 0.15  |
| - | 1  | 8  | 2   | 1.77   | 0.12  |
|   | 1. | 8  | -2  | 1.80   | 0.20  |
|   | 1. | -8 | -2  | 1.49   | 0.15  |
| - | 1  | 8  | 1   | 378.71 | 15.29 |
|   | 1. | 8  | -1  | 369.46 | 15.34 |
|   | 1. | -8 | -1  | 351.37 | 12.47 |
| - | 1  | 8  | 0   | 6.61   | 0.32  |
| - | 1  | -8 | 0   | 7.10   | 0.28  |
|   | 1. | 8  | 1   | 12.50  | 0.55  |
| - | 1  | -8 | -1  | 12.61  | 0.46  |
| - | 1  | 8  | -2  | 15.24  | 0.55  |
|   | 1. | 8  | 2   | 15.08  | 0.65  |
| - | 1  | 8  | -2  | 15.01  | 0.67  |
| - | 1  | 8  | -2  | 15.12  | 0.57  |
| - | 1  | -8 | -2  | 14.56  | 0.53  |
| - | 1  | 8  | -3  | 122.16 | 4.15  |
| - | 1  | 8  | -3  | 125.88 | 4.35  |
|   | 1. | 8  | 3   | 118.41 | 5.09  |
| - | 1  | -8 | -3  | 126.11 | 4.35  |
| - | 1  | -8 | -3  | 117.70 | 4.14  |
| - | 1  | 8  | -4  | 3.84   | 0.25  |
| - | 1  | 8  | -4  | 3.94   | 0.22  |
|   | 1. | 8  | 4   | 4.40   | 0.24  |
| - | 1  | -8 | -4  | 3.58   | 0.21  |
|   | 1. | -8 | 4   | 4.03   | 0.30  |

|   |    |    |     |       |      |
|---|----|----|-----|-------|------|
| - | 1  | -8 | -4  | 4.09  | 0.27 |
|   | 1. | 8  | 5   | 29.41 | 1.20 |
| - | 1  | 8  | -5  | 27.35 | 1.02 |
| - | 1  | 8  | -5  | 28.15 | 1.00 |
|   | 1. | -8 | 5   | 27.66 | 1.22 |
| - | 1  | -8 | -5  | 27.88 | 0.98 |
| - | 1  | -8 | -5  | 27.82 | 1.04 |
| - | 1  | 8  | -6  | 0.24  | 0.15 |
| - | 1  | 8  | -6  | 0.27  | 0.10 |
|   | 1. | -8 | 6   | 0.09  | 0.16 |
| - | 1  | -8 | -6  | 0.01  | 0.15 |
| - | 1  | -8 | -6  | 0.04  | 0.13 |
| - | 1  | 8  | -7  | 3.26  | 0.27 |
|   | 1. | -8 | 7   | 3.42  | 0.36 |
| - | 1  | -8 | -7  | 3.40  | 0.27 |
| - | 1  | -8 | -7  | 3.17  | 0.30 |
| - | 1  | 8  | -8  | 5.56  | 0.37 |
| - | 1  | -8 | -8  | 5.27  | 0.32 |
| - | 1  | -8 | -8  | 5.32  | 0.36 |
|   | 1. | -8 | 8   | 5.23  | 0.40 |
| - | 1  | 8  | -9  | 14.24 | 0.61 |
| - | 1  | -8 | -9  | 15.48 | 0.66 |
|   | 1. | -8 | 9   | 14.18 | 0.73 |
| - | 1  | -8 | -9  | 14.82 | 0.60 |
| - | 1  | 8  | -10 | 1.64  | 0.28 |
| - | 1  | -8 | -10 | 1.43  | 0.23 |
|   | 1. | -8 | 10  | 1.30  | 0.30 |
| - | 1  | -8 | -10 | 1.38  | 0.24 |
| - | 1  | 8  | -11 | 11.07 | 0.58 |
| - | 1  | -8 | -11 | 11.11 | 0.54 |
|   | 1. | -8 | 11  | 10.39 | 0.64 |
| - | 1  | 8  | -12 | 1.27  | 0.32 |
|   | 1. | -8 | 12  | 1.44  | 0.39 |
| - | 1  | -8 | -12 | 1.50  | 0.28 |
| - | 1  | 8  | -13 | 2.11  | 0.34 |
|   | 1. | -8 | 13  | 1.96  | 0.43 |
| - | 1  | -8 | -13 | 1.77  | 0.32 |
|   | 1. | -9 | -14 | 4.80  | 0.50 |
|   | 1. | 9  | -13 | 1.04  | 0.33 |
| - | 1  | -9 | 13  | 1.03  | 0.40 |
|   | 1. | -9 | -13 | 0.52  | 0.31 |
|   | 1. | 9  | -12 | 3.04  | 0.35 |
|   | 1. | -9 | -12 | 2.57  | 0.32 |
| - | 1  | -9 | 12  | 2.76  | 0.40 |
|   | 1. | 9  | -11 | 2.50  | 0.32 |
| - | 1  | -9 | 11  | 2.28  | 0.37 |
|   | 1. | -9 | -11 | 2.17  | 0.29 |
|   | 1. | 9  | -10 | 3.76  | 0.39 |
|   | 1. | -9 | -10 | 3.05  | 0.28 |
|   | 1. | -9 | -10 | 3.01  | 0.36 |
| - | 1  | -9 | 10  | 3.18  | 0.45 |
|   | 1. | 9  | -9  | 1.57  | 0.23 |
|   | 1. | -9 | -9  | 1.41  | 0.23 |
| - | 1  | -9 | 9   | 1.35  | 0.27 |

|    |    |    |       |       |
|----|----|----|-------|-------|
| 1. | -9 | -9 | 1.51  | 0.23  |
| 1. | 9  | -8 | 11.51 | 0.54  |
| 1. | -9 | -8 | 12.42 | 0.53  |
| 1. | -9 | -8 | 11.97 | 0.54  |
| 1. | 9  | -7 | 6.90  | 0.43  |
| 1. | 9  | -7 | 7.15  | 0.38  |
| 1. | -9 | -7 | 6.81  | 0.37  |
| 1. | -9 | -7 | 7.42  | 0.39  |
| 1. | 9  | -6 | 13.61 | 0.66  |
| 1. | 9  | -6 | 13.95 | 0.55  |
| 1. | -9 | -6 | 13.90 | 0.58  |
| 1. | -9 | -6 | 13.89 | 0.55  |
| 1. | 9  | -5 | 21.42 | 0.79  |
| 1. | 9  | -5 | 22.03 | 0.98  |
| 1. | -9 | -5 | 21.80 | 0.79  |
| 1. | 9  | -4 | 23.56 | 1.02  |
| 1. | 9  | -4 | 23.11 | 0.82  |
| 1. | -9 | -4 | 22.90 | 0.83  |
| 1. | 9  | -3 | 4.94  | 0.31  |
| 1. | 9  | -3 | 4.91  | 0.25  |
| 1. | -9 | -3 | 4.73  | 0.26  |
| -  | 1  | 9  | 2     | 5.95  |
| 1. | 9  | -2 | 6.11  | 0.34  |
| 1. | -9 | -2 | 6.47  | 0.29  |
| 1. | 9  | -1 | 5.94  | 0.34  |
| -  | 1  | 9  | 1     | 6.23  |
| 1. | -9 | -1 | 6.53  | 0.29  |
| 1. | 9  | 0  | 0.67  | 0.11  |
| 1. | -9 | 0  | 0.96  | 0.12  |
| -  | 1  | -9 | 0     | 0.83  |
| -  | 1  | 9  | -1    | 0.73  |
| -  | 1  | -9 | -1    | 0.71  |
| 1. | 9  | 2  | 27.84 | 1.18  |
| -  | 1  | 9  | -2    | 28.04 |
| -  | 1  | -9 | -2    | 27.42 |
| -  | 1  | 9  | -3    | 10.47 |
| -  | 1  | 9  | -3    | 10.29 |
| 1. | 9  | 3  | 10.22 | 0.46  |
| -  | 1  | -9 | -3    | 9.93  |
| -  | 1  | -9 | -3    | 10.03 |
| -  | 1  | 9  | -4    | 0.32  |
| 1. | 9  | 4  | 0.44  | 0.10  |
| -  | 1  | 9  | -4    | 0.21  |
| -  | 1  | -9 | -4    | 0.42  |
| -  | 1  | -9 | -4    | 0.24  |
| 1. | -9 | 4  | 0.24  | 0.16  |
| -  | 1  | 9  | -5    | 18.71 |
| -  | 1  | 9  | -5    | 18.95 |
| -  | 1  | -9 | -5    | 19.19 |
| -  | 1  | -9 | -5    | 18.78 |
| 1. | -9 | 5  | 18.30 | 0.85  |
| -  | 1  | 9  | -6    | 14.74 |
| 1. | -9 | 6  | 14.78 | 0.72  |
| -  | 1  | -9 | -6    | 14.71 |

|   |    |     |     |       |      |
|---|----|-----|-----|-------|------|
| - | 1  | -9  | -6  | 14.57 | 0.62 |
| - | 1  | 9   | -7  | 0.44  | 0.20 |
| - | 1  | -9  | -7  | 0.47  | 0.19 |
| - | 1  | -9  | -7  | 0.54  | 0.16 |
|   | 1. | -9  | 7   | 0.41  | 0.24 |
| - | 1  | 9   | -8  | 0.36  | 0.22 |
| - | 1  | -9  | -8  | 0.32  | 0.18 |
| - | 1  | -9  | -8  | 0.43  | 0.20 |
|   | 1. | -9  | 8   | 0.38  | 0.24 |
| - | 1  | 9   | -9  | 0.77  | 0.22 |
| - | 1  | -9  | -9  | 0.71  | 0.23 |
|   | 1. | -9  | 9   | 0.95  | 0.27 |
| - | 1  | -9  | -9  | 0.84  | 0.21 |
| - | 1  | 9   | -10 | 19.24 | 0.79 |
| - | 1  | -9  | -10 | 19.84 | 0.77 |
|   | 1. | -9  | 10  | 19.20 | 0.95 |
| - | 1  | -9  | -10 | 20.07 | 0.83 |
| - | 1  | 9   | -11 | 0.10  | 0.26 |
| - | 1  | -9  | -11 | -0.13 | 0.25 |
|   | 1. | -9  | 11  | 0.58  | 0.32 |
| - | 1  | 9   | -12 | 0.70  | 0.32 |
|   | 1. | -9  | 12  | 0.64  | 0.38 |
| - | 1  | -9  | -12 | -0.01 | 0.27 |
| - | 1  | 9   | -13 | 0.76  | 0.35 |
|   | 1. | -9  | 13  | 0.56  | 0.43 |
|   | 1. | -10 | -14 | 0.45  | 0.34 |
|   | 1. | 10  | -13 | 0.77  | 0.35 |
| - | 1  | -10 | 13  | 0.65  | 0.42 |
|   | 1. | -10 | -13 | 0.74  | 0.31 |
|   | 1. | 10  | -12 | 0.11  | 0.29 |
|   | 1. | -10 | -12 | -0.09 | 0.28 |
| - | 1  | -10 | 12  | 0.18  | 0.38 |
|   | 1. | 10  | -11 | 5.56  | 0.47 |
|   | 1. | -10 | -11 | 4.79  | 0.41 |
| - | 1  | -10 | 11  | 5.09  | 0.54 |
|   | 1. | 10  | -10 | 0.26  | 0.26 |
|   | 1. | -10 | -10 | -0.01 | 0.23 |
| - | 1  | -10 | 10  | 0.24  | 0.29 |
|   | 1. | -10 | -10 | -0.05 | 0.23 |
|   | 1. | 10  | -9  | 6.95  | 0.44 |
|   | 1. | -10 | -9  | 6.77  | 0.43 |
| - | 1  | -10 | 9   | 6.82  | 0.49 |
|   | 1. | -10 | -9  | 7.21  | 0.42 |
|   | 1. | 10  | -8  | 4.23  | 0.35 |
|   | 1. | -10 | -8  | 3.85  | 0.34 |
|   | 1. | -10 | -8  | 3.81  | 0.35 |
|   | 1. | 10  | -7  | 12.06 | 0.50 |
|   | 1. | 10  | -7  | 12.08 | 0.64 |
|   | 1. | -10 | -7  | 11.91 | 0.49 |
|   | 1. | -10 | -7  | 11.54 | 0.54 |
|   | 1. | 10  | -6  | 11.58 | 0.62 |
|   | 1. | 10  | -6  | 11.89 | 0.49 |
|   | 1. | -10 | -6  | 12.22 | 0.53 |
|   | 1. | -10 | -6  | 11.93 | 0.50 |

|    |     |     |        |       |
|----|-----|-----|--------|-------|
| 1. | 10  | -5  | 115.56 | 3.87  |
| 1. | 10  | -5  | 112.76 | 4.76  |
| 1. | -10 | -5  | 112.17 | 3.87  |
| 1. | 10  | -4  | 6.76   | 0.32  |
| 1. | 10  | -4  | 6.92   | 0.40  |
| 1. | -10 | -4  | 6.39   | 0.32  |
| 1. | 10  | -3  | 12.69  | 0.59  |
| 1. | 10  | -3  | 12.85  | 0.49  |
| 1. | -10 | -3  | 12.35  | 0.49  |
| -  | 1   | 10  | 2      | 9.97  |
| 1. | 10  | -2  | 10.49  | 0.50  |
| 1. | -10 | -2  | 10.61  | 0.42  |
| 1. | 10  | -1  | 52.36  | 2.14  |
| -  | 1   | 10  | 1      | 47.87 |
| 1. | -10 | -1  | 51.63  | 1.74  |
| -  | 1   | 10  | 0      | 1.00  |
| 1. | 10  | 0   | 1.59   | 0.20  |
| -  | 1   | -10 | 0      | 1.32  |
| 1. | -10 | 0   | 1.12   | 0.13  |
| -  | 1   | 10  | -1     | 14.42 |
| -  | 1   | -10 | -1     | 14.54 |
| -  | 1   | 10  | -2     | 11.52 |
| -  | 1   | -10 | -2     | 11.89 |
| -  | 1   | -10 | -2     | 11.73 |
| -  | 1   | 10  | -3     | 14.28 |
| 1. | 10  | 3   | 13.98  | 0.61  |
| -  | 1   | -10 | -3     | 13.55 |
| -  | 1   | 10  | -4     | 8.81  |
| 1. | -10 | 4   | 8.81   | 0.48  |
| -  | 1   | -10 | -4     | 8.66  |
| -  | 1   | -10 | -4     | 8.98  |
| -  | 1   | 10  | -5     | 5.49  |
| 1. | -10 | 5   | 5.37   | 0.36  |
| -  | 1   | -10 | -5     | 5.21  |
| -  | 1   | -10 | -5     | 5.64  |
| -  | 1   | 10  | -6     | 9.17  |
| -  | 1   | -10 | -6     | 8.73  |
| -  | 1   | -10 | -6     | 9.25  |
| 1. | -10 | 6   | 8.88   | 0.53  |
| -  | 1   | 10  | -7     | 62.77 |
| 1. | -10 | 7   | 63.75  | 2.75  |
| -  | 1   | -10 | -7     | 66.28 |
| -  | 1   | -10 | -7     | 65.58 |
| -  | 1   | 10  | -8     | 1.20  |
| -  | 1   | -10 | -8     | 1.23  |
| 1. | -10 | 8   | 0.97   | 0.29  |
| -  | 1   | -10 | -8     | 1.07  |
| -  | 1   | 10  | -9     | 12.30 |
| -  | 1   | -10 | -9     | 12.86 |
| 1. | -10 | 9   | 12.59  | 0.71  |
| -  | 1   | -10 | -9     | 12.66 |
| -  | 1   | 10  | -10    | 1.62  |
| -  | 1   | -10 | -10    | 1.57  |
| 1. | -10 | 10  | 1.59   | 0.35  |

|   |    |     |     |       |      |
|---|----|-----|-----|-------|------|
| - | 1  | -10 | -10 | 1.45  | 0.26 |
| - | 1  | 10  | -11 | 0.55  | 0.30 |
| - | 1  | -10 | -11 | 0.55  | 0.25 |
|   | 1. | -10 | 11  | 0.71  | 0.37 |
| - | 1  | 10  | -12 | 0.40  | 0.33 |
|   | 1. | -10 | 12  | 0.32  | 0.40 |
|   | 1. | 11  | -13 | 0.00  | 0.37 |
|   | 1. | -11 | -13 | -0.04 | 0.31 |
| - | 1  | -11 | 13  | 0.15  | 0.42 |
|   | 1. | 11  | -12 | 5.25  | 0.51 |
| - | 1  | -11 | 12  | 5.35  | 0.58 |
|   | 1. | -11 | -12 | 4.75  | 0.44 |
|   | 1. | 11  | -11 | 0.38  | 0.30 |
| - | 1  | -11 | 11  | 0.27  | 0.36 |
|   | 1. | -11 | -11 | 0.04  | 0.26 |
|   | 1. | 11  | -10 | 5.53  | 0.41 |
| - | 1  | -11 | 10  | 6.05  | 0.53 |
|   | 1. | -11 | -10 | 5.59  | 0.42 |
|   | 1. | -11 | -10 | 5.09  | 0.44 |
|   | 1. | 11  | -9  | 0.07  | 0.25 |
| - | 1  | -11 | 9   | 0.08  | 0.31 |
|   | 1. | -11 | -9  | 0.04  | 0.22 |
|   | 1. | -11 | -9  | 0.07  | 0.23 |
|   | 1. | 11  | -8  | 10.08 | 0.50 |
|   | 1. | -11 | -8  | 9.94  | 0.51 |
|   | 1. | -11 | -8  | 9.93  | 0.45 |
|   | 1. | 11  | -7  | 0.71  | 0.23 |
|   | 1. | 11  | -7  | 0.86  | 0.21 |
|   | 1. | -11 | -7  | 1.09  | 0.20 |
|   | 1. | -11 | -7  | 0.62  | 0.18 |
|   | 1. | 11  | -6  | 4.90  | 0.32 |
|   | 1. | 11  | -6  | 4.32  | 0.36 |
|   | 1. | -11 | -6  | 4.49  | 0.32 |
|   | 1. | -11 | -6  | 4.51  | 0.35 |
|   | 1. | 11  | -5  | 4.07  | 0.28 |
|   | 1. | 11  | -5  | 4.01  | 0.37 |
|   | 1. | -11 | -5  | 3.72  | 0.29 |
|   | 1. | 11  | -4  | 69.83 | 2.39 |
|   | 1. | 11  | -4  | 70.68 | 2.94 |
|   | 1. | -11 | -4  | 67.92 | 2.38 |
|   | 1. | 11  | -3  | 17.94 | 0.81 |
|   | 1. | -11 | -3  | 17.70 | 0.66 |
| - | 1  | 11  | 2   | 9.66  | 0.45 |
|   | 1. | 11  | -2  | 10.06 | 0.50 |
|   | 1. | -11 | -2  | 10.51 | 0.42 |
|   | 1. | 11  | -1  | 4.05  | 0.29 |
|   | 1. | -11 | -1  | 4.47  | 0.26 |
|   | 1. | 11  | 0   | 41.69 | 1.75 |
| - | 1  | 11  | 0   | 40.29 | 1.74 |
|   | 1. | -11 | 0   | 41.61 | 1.44 |
| - | 1  | -11 | 0   | 41.72 | 1.43 |
|   | 1. | 11  | 1   | 0.85  | 0.14 |
| - | 1  | 11  | -1  | 0.82  | 0.14 |
| - | 1  | -11 | -1  | 0.81  | 0.12 |

|    |     |     |     |       |      |
|----|-----|-----|-----|-------|------|
| -  | 1   | -11 | -2  | 18.32 | 0.59 |
| -  | 1   | -11 | -2  | 13.82 | 0.63 |
| 1. | 11  | 3   |     | 6.94  | 0.37 |
| -  | 1   | -11 | -3  | 9.29  | 0.35 |
| -  | 1   | 11  | -4  | 6.54  | 0.35 |
| 1. | -11 | 4   |     | 5.91  | 0.41 |
| -  | 1   | -11 | -4  | 6.36  | 0.34 |
| -  | 1   | -11 | -4  | 6.53  | 0.30 |
| -  | 1   | 11  | -5  | 10.09 | 0.45 |
| -  | 1   | -11 | -5  | 10.63 | 0.44 |
| 1. | -11 | 5   |     | 10.52 | 0.56 |
| -  | 1   | -11 | -5  | 10.61 | 0.50 |
| -  | 1   | 11  | -6  | 32.63 | 1.19 |
| -  | 1   | -11 | -6  | 33.59 | 1.17 |
| -  | 1   | -11 | -6  | 31.76 | 1.23 |
| 1. | -11 | 6   |     | 33.60 | 1.46 |
| -  | 1   | 11  | -7  | 2.06  | 0.25 |
| -  | 1   | -11 | -7  | 1.68  | 0.22 |
| -  | 1   | -11 | -7  | 1.95  | 0.21 |
| 1. | -11 | 7   |     | 1.66  | 0.27 |
| -  | 1   | 11  | -8  | 1.29  | 0.24 |
| -  | 1   | -11 | -8  | 1.26  | 0.24 |
| -  | 1   | -11 | -8  | 1.39  | 0.22 |
| 1. | -11 | 8   |     | 1.40  | 0.31 |
| -  | 1   | 11  | -9  | 0.10  | 0.26 |
| 1. | -11 | 9   |     | 0.18  | 0.29 |
| -  | 1   | -11 | -9  | -0.04 | 0.21 |
| -  | 1   | -11 | -9  | -0.15 | 0.24 |
| -  | 1   | 11  | -10 | 1.03  | 0.28 |
| -  | 1   | -11 | -10 | 0.98  | 0.24 |
| 1. | -11 | 10  |     | 1.19  | 0.36 |
| -  | 1   | -11 | -10 | 0.94  | 0.28 |
| -  | 1   | 11  | -11 | 4.89  | 0.49 |
| 1. | -11 | 11  |     | 4.98  | 0.57 |
| -  | 1   | 11  | -12 | 0.79  | 0.35 |
| 1. | -11 | 12  |     | 0.65  | 0.42 |
| 1. | -12 | -13 |     | 1.02  | 0.32 |
| 1. | 12  | -12 |     | 0.28  | 0.34 |
| 1. | -12 | -12 |     | -0.18 | 0.29 |
| -  | 1   | -12 | 12  | 0.24  | 0.41 |
| 1. | 12  | -11 |     | 6.41  | 0.51 |
| -  | 1   | -12 | 11  | 5.78  | 0.59 |
| 1. | -12 | -11 |     | 5.44  | 0.45 |
| 1. | 12  | -10 |     | 6.56  | 0.47 |
| 1. | -12 | -10 |     | 5.83  | 0.43 |
| 1. | -12 | -10 |     | 6.11  | 0.47 |
| -  | 1   | -12 | 10  | 6.28  | 0.57 |
| 1. | 12  | -9  |     | 1.62  | 0.26 |
| -  | 1   | -12 | 9   | 1.34  | 0.34 |
| 1. | -12 | -9  |     | 1.93  | 0.26 |
| 1. | -12 | -9  |     | 1.46  | 0.26 |
| 1. | 12  | -8  |     | 0.62  | 0.24 |
| -  | 1   | -12 | 8   | 0.11  | 0.27 |
| 1. | -12 | -8  |     | 0.73  | 0.22 |

|    |     |     |       |       |      |
|----|-----|-----|-------|-------|------|
| 1. | -12 | -8  | 0.21  | 0.21  |      |
| 1. | 12  | -7  | 0.60  | 0.27  |      |
| 1. | 12  | -7  | 0.56  | 0.21  |      |
| 1. | -12 | -7  | 0.23  | 0.20  |      |
| 1. | -12 | -7  | 0.24  | 0.19  |      |
| 1. | 12  | -6  | 1.61  | 0.21  |      |
| 1. | 12  | -6  | 1.52  | 0.26  |      |
| 1. | -12 | -6  | 1.41  | 0.22  |      |
| 1. | -12 | -6  | 1.76  | 0.21  |      |
| 1. | 12  | -5  | 0.07  | 0.17  |      |
| 1. | 12  | -5  | 0.06  | 0.22  |      |
| 1. | -12 | -5  | 0.14  | 0.17  |      |
| 1. | 12  | -4  | 10.30 | 0.44  |      |
| 1. | 12  | -4  | 10.41 | 0.53  |      |
| 1. | -12 | -4  | 10.27 | 0.46  |      |
| 1. | 12  | -3  | 0.89  | 0.19  |      |
| 1. | -12 | -3  | 1.14  | 0.16  |      |
| 1. | 12  | -2  | 1.77  | 0.20  |      |
| 1. | -12 | -2  | 1.83  | 0.17  |      |
| 1. | 12  | -1  | 30.80 | 1.34  |      |
| 1. | -12 | -1  | 31.04 | 1.10  |      |
| -  | 1   | 12  | 0     | 6.75  | 0.36 |
| 1. | 12  | 0   | 6.96  | 0.38  |      |
| 1. | -12 | 0   | 7.04  | 0.35  |      |
| -  | 1   | -12 | 0     | 7.01  | 0.33 |
| 1. | 12  | 1   | 2.43  | 0.23  |      |
| -  | 1   | 12  | -1    | 2.32  | 0.25 |
| -  | 1   | -12 | -1    | 2.39  | 0.27 |
| -  | 1   | -12 | -1    | 3.03  | 0.22 |
| 1. | 12  | 2   | 6.76  | 0.36  |      |
| -  | 1   | -12 | -2    | 7.09  | 0.32 |
| -  | 1   | -12 | -2    | 7.30  | 0.38 |
| -  | 1   | -12 | -3    | 0.96  | 0.17 |
| -  | 1   | -12 | -3    | 1.23  | 0.14 |
| 1. | -12 | 3   | 0.80  | 0.20  |      |
| -  | 1   | 12  | -4    | 1.29  | 0.18 |
| 1. | -12 | 4   | 1.23  | 0.23  |      |
| -  | 1   | -12 | -4    | 1.41  | 0.16 |
| -  | 1   | -12 | -4    | 1.14  | 0.18 |
| -  | 1   | 12  | -5    | 9.87  | 0.47 |
| -  | 1   | -12 | -5    | 10.51 | 0.44 |
| -  | 1   | -12 | -5    | 10.14 | 0.48 |
| 1. | -12 | 5   | 10.14 | 0.56  |      |
| -  | 1   | 12  | -6    | 7.36  | 0.39 |
| 1. | -12 | 6   | 7.44  | 0.47  |      |
| -  | 1   | -12 | -6    | 7.87  | 0.39 |
| -  | 1   | -12 | -6    | 7.79  | 0.44 |
| -  | 1   | 12  | -7    | 5.36  | 0.39 |
| 1. | -12 | 7   | 5.50  | 0.43  |      |
| -  | 1   | -12 | -7    | 5.15  | 0.37 |
| -  | 1   | -12 | -7    | 5.18  | 0.34 |
| -  | 1   | 12  | -8    | 3.08  | 0.33 |
| 1. | -12 | 8   | 3.27  | 0.45  |      |
| -  | 1   | -12 | -8    | 3.13  | 0.31 |

|   |    |     |     |       |      |
|---|----|-----|-----|-------|------|
| - | 1  | -12 | -8  | 2.61  | 0.28 |
| - | 1  | 12  | -9  | 0.40  | 0.27 |
|   | 1. | -12 | 9   | 0.04  | 0.30 |
| - | 1  | -12 | -9  | 0.07  | 0.23 |
| - | 1  | 12  | -10 | 1.73  | 0.32 |
| - | 1  | -12 | -10 | 1.26  | 0.30 |
|   | 1. | -12 | 10  | 1.46  | 0.38 |
| - | 1  | 12  | -11 | 1.27  | 0.34 |
|   | 1. | -12 | 11  | 1.39  | 0.42 |
| - | 1  | -12 | -11 | 1.38  | 0.31 |
| - | 1  | 12  | -12 | 0.69  | 0.36 |
|   | 1. | -12 | 12  | 0.05  | 0.44 |
|   | 1. | 13  | -12 | 2.60  | 0.39 |
| - | 1  | -13 | 12  | 2.06  | 0.47 |
|   | 1. | 13  | -11 | 1.52  | 0.34 |
|   | 1. | -13 | -11 | 1.35  | 0.29 |
|   | 1. | -13 | -11 | 1.54  | 0.30 |
| - | 1  | -13 | 11  | 1.39  | 0.42 |
|   | 1. | 13  | -10 | 1.53  | 0.31 |
|   | 1. | -13 | -10 | 1.04  | 0.27 |
|   | 1. | -13 | -10 | 1.10  | 0.28 |
| - | 1  | -13 | 10  | 1.28  | 0.39 |
|   | 1. | 13  | -9  | 3.11  | 0.32 |
| - | 1  | -13 | 9   | 2.75  | 0.39 |
|   | 1. | -13 | -9  | 3.26  | 0.37 |
|   | 1. | -13 | -9  | 2.69  | 0.30 |
|   | 1. | 13  | -8  | 7.14  | 0.44 |
|   | 1. | -13 | -8  | 7.14  | 0.41 |
| - | 1  | -13 | 8   | 6.33  | 0.51 |
|   | 1. | -13 | -8  | 6.50  | 0.41 |
|   | 1. | 13  | -7  | 4.78  | 0.37 |
|   | 1. | 13  | -7  | 5.02  | 0.45 |
|   | 1. | -13 | -7  | 4.93  | 0.36 |
|   | 1. | -13 | -7  | 4.88  | 0.40 |
|   | 1. | 13  | -6  | 3.39  | 0.35 |
|   | 1. | 13  | -6  | 3.87  | 0.32 |
|   | 1. | -13 | -6  | 3.45  | 0.32 |
|   | 1. | -13 | -6  | 2.90  | 0.35 |
|   | 1. | 13  | -5  | 0.14  | 0.18 |
|   | 1. | 13  | -5  | 0.23  | 0.23 |
|   | 1. | -13 | -5  | 0.02  | 0.18 |
|   | 1. | 13  | -4  | 62.54 | 2.62 |
|   | 1. | -13 | -4  | 60.36 | 2.12 |
|   | 1. | 13  | -3  | 4.24  | 0.35 |
|   | 1. | -13 | -3  | 4.48  | 0.31 |
|   | 1. | 13  | -2  | 21.97 | 0.98 |
|   | 1. | -13 | -2  | 22.00 | 0.81 |
|   | 1. | 13  | -1  | 2.49  | 0.26 |
|   | 1. | -13 | -1  | 2.54  | 0.25 |
| - | 1  | -13 | 1   | 2.51  | 0.25 |
|   | 1. | 13  | 0   | 8.04  | 0.43 |
| - | 1  | -13 | 0   | 8.14  | 0.37 |
|   | 1. | -13 | 0   | 8.18  | 0.39 |
|   | 1. | 13  | 1   | 15.50 | 0.70 |

|    |     |     |       |       |      |
|----|-----|-----|-------|-------|------|
| -  | 1   | -13 | -1    | 15.29 | 0.58 |
| -  | 1   | -13 | -1    | 15.47 | 0.62 |
| -  | 1   | -13 | -2    | 4.72  | 0.33 |
| -  | 1   | -13 | -2    | 4.39  | 0.27 |
| -  | 1   | -13 | -3    | 6.23  | 0.36 |
| 1. | -13 | 3   | 6.28  | 0.45  |      |
| -  | 1   | -13 | -3    | 6.97  | 0.33 |
| -  | 1   | -13 | -4    | 29.86 | 1.15 |
| -  | 1   | -13 | -4    | 30.04 | 1.07 |
| 1. | -13 | 4   | 30.66 | 1.34  |      |
| -  | 1   | 13  | -5    | 6.50  | 0.37 |
| 1. | -13 | 5   | 6.96  | 0.47  |      |
| -  | 1   | -13 | -5    | 6.75  | 0.39 |
| -  | 1   | -13 | -5    | 7.26  | 0.37 |
| -  | 1   | 13  | -6    | 4.18  | 0.36 |
| 1. | -13 | 6   | 4.16  | 0.44  |      |
| -  | 1   | -13 | -6    | 4.79  | 0.33 |
| -  | 1   | -13 | -6    | 3.71  | 0.34 |
| -  | 1   | 13  | -7    | 1.56  | 0.24 |
| 1. | -13 | 7   | 1.35  | 0.32  |      |
| -  | 1   | -13 | -7    | 1.39  | 0.26 |
| -  | 1   | 13  | -8    | 0.17  | 0.24 |
| -  | 1   | -13 | -8    | -0.18 | 0.22 |
| 1. | -13 | 8   | 0.25  | 0.29  |      |
| -  | 1   | 13  | -9    | 1.83  | 0.28 |
| 1. | -13 | 9   | 1.88  | 0.38  |      |
| -  | 1   | -13 | -9    | 1.63  | 0.29 |
| -  | 1   | 13  | -10   | 1.96  | 0.33 |
| -  | 1   | -13 | -10   | 1.86  | 0.31 |
| 1. | -13 | 10  | 2.00  | 0.41  |      |
| -  | 1   | 13  | -11   | 1.34  | 0.33 |
| -  | 1   | -13 | -11   | 1.52  | 0.33 |
| 1. | -13 | 11  | 1.45  | 0.44  |      |
| 1. | 14  | -12 | 1.70  | 0.39  |      |
| 1. | 14  | -11 | 0.34  | 0.34  |      |
| 1. | -14 | -11 | 0.06  | 0.30  |      |
| -  | 1   | -14 | 11    | 0.19  | 0.43 |
| 1. | 14  | -10 | 0.71  | 0.31  |      |
| 1. | -14 | -10 | 0.69  | 0.27  |      |
| 1. | -14 | -10 | 0.51  | 0.29  |      |
| -  | 1   | -14 | 10    | 0.47  | 0.37 |
| 1. | 14  | -9  | 0.50  | 0.28  |      |
| 1. | -14 | -9  | 0.27  | 0.27  |      |
| 1. | -14 | -9  | 0.31  | 0.25  |      |
| -  | 1   | -14 | 9     | 0.09  | 0.36 |
| 1. | 14  | -8  | 2.57  | 0.29  |      |
| -  | 1   | -14 | 8     | 2.17  | 0.38 |
| 1. | -14 | -8  | 2.40  | 0.29  |      |
| 1. | -14 | -8  | 2.97  | 0.27  |      |
| 1. | 14  | -7  | 6.25  | 0.40  |      |
| 1. | -14 | -7  | 5.60  | 0.43  |      |
| 1. | -14 | -7  | 6.05  | 0.39  |      |
| 1. | 14  | -6  | 14.88 | 0.77  |      |
| 1. | 14  | -6  | 15.42 | 0.63  |      |

|    |     |     |       |      |
|----|-----|-----|-------|------|
| 1. | -14 | -6  | 14.99 | 0.62 |
| 1. | -14 | -6  | 14.82 | 0.67 |
| 1. | 14  | -5  | 9.49  | 0.57 |
| 1. | 14  | -5  | 10.24 | 0.46 |
| 1. | -14 | -5  | 9.38  | 0.47 |
| 1. | -14 | -5  | 9.83  | 0.46 |
| 1. | 14  | -4  | 0.19  | 0.22 |
| 1. | -14 | -4  | 0.30  | 0.19 |
| 1. | 14  | -3  | 4.72  | 0.37 |
| 1. | -14 | -3  | 4.78  | 0.31 |
| 1. | 14  | -2  | 5.60  | 0.38 |
| 1. | -14 | -2  | 5.90  | 0.34 |
| 1. | 14  | -1  | 3.18  | 0.31 |
| 1. | -14 | -1  | 3.26  | 0.28 |
| -  | 1   | -14 | 1     | 2.79 |
| 1. | 14  | 0   | 3.27  | 0.29 |
| 1. | -14 | 0   | 3.79  | 0.30 |
| -  | 1   | -14 | 0     | 3.55 |
| -  | 1   | -14 | 0     | 3.37 |
| 1. | -14 | 1   | 0.04  | 0.18 |
| -  | 1   | -14 | -1    | 0.17 |
| -  | 1   | -14 | -1    | 0.36 |
| -  | 1   | -14 | -2    | 0.60 |
| 1. | -14 | 2   | 0.30  | 0.20 |
| -  | 1   | -14 | -2    | 0.33 |
| 1. | -14 | 3   | 0.65  | 0.22 |
| -  | 1   | -14 | -3    | 0.73 |
| -  | 1   | -14 | -3    | 0.48 |
| -  | 1   | -14 | -4    | 2.40 |
| -  | 1   | -14 | -4    | 1.92 |
| 1. | -14 | 4   | 1.94  | 0.27 |
| -  | 1   | -14 | -5    | 4.36 |
| 1. | -14 | 5   | 4.74  | 0.42 |
| -  | 1   | 14  | -6    | 0.54 |
| -  | 1   | -14 | -6    | 0.02 |
| 1. | -14 | 6   | 0.17  | 0.29 |
| -  | 1   | 14  | -7    | 6.12 |
| 1. | -14 | 7   | 5.92  | 0.52 |
| -  | 1   | -14 | -7    | 5.44 |
| -  | 1   | 14  | -8    | 6.34 |
| -  | 1   | -14 | -8    | 6.13 |
| 1. | -14 | 8   | 6.74  | 0.56 |
| -  | 1   | 14  | -9    | 9.49 |
| 1. | -14 | 9   | 8.16  | 0.60 |
| -  | 1   | -14 | -9    | 8.67 |
| -  | 1   | 14  | -10   | 4.32 |
| 1. | -14 | 10  | 4.76  | 0.59 |
| -  | 1   | -14 | -10   | 4.02 |
| -  | 1   | 14  | -11   | 1.09 |
| -  | 1   | -14 | -11   | 0.62 |
| 1. | -14 | 11  | 0.51  | 0.44 |
| 1. | 15  | -11 | 0.63  | 0.35 |
| -  | 1   | -15 | 11    | 0.66 |
| 1. | -15 | -11 | 0.22  | 0.31 |

|    |     |     |       |       |      |
|----|-----|-----|-------|-------|------|
| 1. | 15  | -10 | 1.39  | 0.34  |      |
| -  | 1   | -15 | 10    | 1.49  | 0.43 |
| 1. | -15 | -10 | 1.27  | 0.32  |      |
| 1. | 15  | -9  | 1.07  | 0.30  |      |
| -  | 1   | -15 | 9     | 0.54  | 0.35 |
| 1. | -15 | -9  | 0.99  | 0.27  |      |
| 1. | -15 | -9  | 1.14  | 0.27  |      |
| 1. | 15  | -8  | 1.71  | 0.29  |      |
| 1. | -15 | -8  | 1.96  | 0.26  |      |
| 1. | -15 | -8  | 1.72  | 0.27  |      |
| -  | 1   | -15 | 8     | 1.32  | 0.38 |
| 1. | 15  | -7  | 3.89  | 0.38  |      |
| 1. | -15 | -7  | 4.00  | 0.40  |      |
| 1. | -15 | -7  | 2.86  | 0.30  |      |
| 1. | 15  | -6  | 0.38  | 0.28  |      |
| 1. | 15  | -6  | 0.09  | 0.22  |      |
| 1. | -15 | -6  | 0.11  | 0.21  |      |
| 1. | -15 | -6  | 0.09  | 0.23  |      |
| 1. | 15  | -5  | 7.05  | 0.49  |      |
| 1. | -15 | -5  | 7.44  | 0.40  |      |
| 1. | -15 | -5  | 6.79  | 0.44  |      |
| 1. | 15  | -4  | 0.42  | 0.24  |      |
| 1. | -15 | -4  | 0.56  | 0.19  |      |
| 1. | 15  | -3  | 6.97  | 0.45  |      |
| 1. | -15 | -3  | 6.66  | 0.37  |      |
| 1. | 15  | -2  | 0.49  | 0.20  |      |
| 1. | -15 | -2  | 0.57  | 0.18  |      |
| 1. | 15  | -1  | 0.92  | 0.21  |      |
| 1. | -15 | -1  | 1.24  | 0.20  |      |
| -  | 1   | -15 | 1     | 0.76  | 0.17 |
| 1. | -15 | 0   | 7.05  | 0.39  |      |
| -  | 1   | -15 | 0     | 7.30  | 0.35 |
| -  | 1   | -15 | 0     | 6.93  | 0.41 |
| -  | 1   | -15 | -1    | 2.63  | 0.32 |
| -  | 1   | -15 | -1    | 3.09  | 0.28 |
| 1. | -15 | 1   | 2.75  | 0.24  |      |
| 1. | -15 | 1   | 3.21  | 0.33  |      |
| -  | 1   | -15 | -2    | -0.12 | 0.18 |
| 1. | -15 | 2   | -0.19 | 0.22  |      |
| -  | 1   | -15 | -2    | 0.01  | 0.14 |
| 1. | -15 | 3   | 0.50  | 0.25  |      |
| -  | 1   | -15 | -3    | 0.48  | 0.21 |
| -  | 1   | -15 | -4    | 0.08  | 0.20 |
| 1. | -15 | 4   | -0.16 | 0.25  |      |
| 1. | -15 | 5   | 14.60 | 0.76  |      |
| -  | 1   | -15 | -5    | 14.18 | 0.63 |
| -  | 1   | -15 | -6    | 0.22  | 0.24 |
| 1. | -15 | 6   | 0.14  | 0.30  |      |
| -  | 1   | 15  | -7    | 1.86  | 0.29 |
| 1. | -15 | 7   | 1.48  | 0.36  |      |
| -  | 1   | -15 | -7    | 1.43  | 0.26 |
| -  | 1   | 15  | -8    | 0.27  | 0.29 |
| -  | 1   | -15 | -8    | -0.16 | 0.27 |
| 1. | -15 | 8   | 0.03  | 0.36  |      |

|   |    |     |     |       |      |
|---|----|-----|-----|-------|------|
| - | 1  | 15  | -9  | 5.06  | 0.48 |
| - | 1  | -15 | -9  | 4.50  | 0.48 |
|   | 1. | -15 | 9   | 4.73  | 0.58 |
| - | 1  | 15  | -10 | -0.03 | 0.33 |
|   | 1. | -15 | 10  | 0.29  | 0.39 |
| - | 1  | -15 | -10 | -0.10 | 0.31 |
| - | 1  | -15 | -11 | 1.40  | 0.36 |
|   | 1. | 16  | -11 | 0.60  | 0.37 |
|   | 1. | -16 | -11 | 0.07  | 0.32 |
|   | 1. | 16  | -10 | 1.51  | 0.35 |
| - | 1  | -16 | 10  | 1.14  | 0.45 |
|   | 1. | -16 | -10 | 1.43  | 0.33 |
|   | 1. | 16  | -9  | 0.22  | 0.31 |
|   | 1. | -16 | -9  | 0.09  | 0.29 |
| - | 1  | -16 | 9   | 0.20  | 0.40 |
|   | 1. | 16  | -8  | 0.53  | 0.28 |
| - | 1  | -16 | 8   | -0.13 | 0.37 |
|   | 1. | -16 | -8  | 0.34  | 0.28 |
|   | 1. | 16  | -7  | 1.42  | 0.27 |
|   | 1. | -16 | -7  | 0.96  | 0.24 |
| - | 1  | -16 | 7   | 0.33  | 0.36 |
|   | 1. | -16 | -7  | 0.82  | 0.27 |
|   | 1. | -16 | -6  | 0.88  | 0.23 |
|   | 1. | -16 | -6  | 0.71  | 0.25 |
|   | 1. | 16  | -5  | 2.17  | 0.31 |
|   | 1. | -16 | -5  | 1.75  | 0.26 |
|   | 1. | -16 | -5  | 2.21  | 0.24 |
|   | 1. | 16  | -4  | 0.63  | 0.27 |
|   | 1. | -16 | -4  | 0.74  | 0.20 |
|   | 1. | 16  | -3  | 1.06  | 0.24 |
|   | 1. | -16 | -3  | 0.82  | 0.20 |
|   | 1. | 16  | -2  | 6.14  | 0.42 |
|   | 1. | -16 | -2  | 6.38  | 0.37 |
| - | 1  | -16 | 2   | 5.58  | 0.37 |
| - | 1  | -16 | 2   | 6.23  | 0.40 |
|   | 1. | 16  | -1  | 13.78 | 0.69 |
|   | 1. | -16 | -1  | 14.06 | 0.59 |
| - | 1  | -16 | 1   | 14.30 | 0.62 |
| - | 1  | -16 | 1   | 14.13 | 0.58 |
| - | 1  | -16 | 0   | 0.38  | 0.17 |
| - | 1  | -16 | 0   | -0.01 | 0.21 |
|   | 1. | -16 | 0   | 0.53  | 0.20 |
| - | 1  | -16 | -1  | 8.70  | 0.47 |
|   | 1. | -16 | 1   | 9.06  | 0.45 |
| - | 1  | -16 | -2  | 3.34  | 0.35 |
|   | 1. | -16 | 2   | 3.76  | 0.36 |
| - | 1  | -16 | -3  | 0.08  | 0.23 |
|   | 1. | -16 | 3   | 0.16  | 0.25 |
| - | 1  | -16 | -4  | 8.65  | 0.46 |
|   | 1. | -16 | 4   | 8.98  | 0.56 |
| - | 1  | -16 | -5  | 0.14  | 0.22 |
|   | 1. | -16 | 5   | 0.09  | 0.30 |
|   | 1. | -16 | 6   | 0.57  | 0.33 |
| - | 1  | -16 | -6  | 0.34  | 0.24 |

|    |     |     |       |       |      |
|----|-----|-----|-------|-------|------|
| 1. | -16 | 7   | 1.98  | 0.38  |      |
| -  | 1   | -16 | -7    | 1.71  | 0.30 |
| -  | 1   | 16  | -8    | 0.57  | 0.30 |
| 1. | -16 | 8   | 0.20  | 0.38  |      |
| -  | 1   | -16 | -8    | -0.01 | 0.29 |
| -  | 1   | 16  | -9    | 0.17  | 0.30 |
| 1. | -16 | 9   | 0.23  | 0.41  |      |
| -  | 1   | -16 | -9    | -0.31 | 0.30 |
| -  | 1   | 16  | -10   | 0.25  | 0.36 |
| 1. | -16 | 10  | 0.25  | 0.42  |      |
| -  | 1   | -16 | -10   | 0.03  | 0.32 |
| 1. | 17  | -10 | 0.20  | 0.34  |      |
| -  | 1   | -17 | 10    | 0.25  | 0.41 |
| 1. | -17 | -10 | 0.11  | 0.32  |      |
| 1. | 17  | -9  | 5.73  | 0.49  |      |
| -  | 1   | -17 | 9     | 4.95  | 0.63 |
| 1. | -17 | -9  | 5.17  | 0.50  |      |
| 1. | -17 | -8  | -0.06 | 0.27  |      |
| -  | 1   | -17 | 8     | -0.02 | 0.39 |
| 1. | -17 | -7  | 0.95  | 0.28  |      |
| -  | 1   | -17 | 7     | 0.76  | 0.37 |
| 1. | -17 | -6  | 0.13  | 0.24  |      |
| 1. | 17  | -5  | 1.15  | 0.30  |      |
| 1. | -17 | -5  | 0.65  | 0.26  |      |
| 1. | -17 | -5  | 1.27  | 0.24  |      |
| 1. | 17  | -4  | 5.56  | 0.45  |      |
| 1. | -17 | -4  | 5.31  | 0.42  |      |
| 1. | -17 | -4  | 5.57  | 0.37  |      |
| 1. | 17  | -3  | 3.82  | 0.39  |      |
| 1. | -17 | -3  | 3.88  | 0.34  |      |
| -  | 1   | -17 | 3     | 3.40  | 0.38 |
| 1. | 17  | -2  | 1.02  | 0.25  |      |
| 1. | -17 | -2  | 1.01  | 0.21  |      |
| -  | 1   | -17 | 2     | 0.83  | 0.23 |
| -  | 1   | -17 | 2     | 0.77  | 0.20 |
| 1. | -17 | -1  | 0.13  | 0.20  |      |
| -  | 1   | -17 | 1     | -0.06 | 0.22 |
| 1. | -17 | 0   | 3.42  | 0.33  |      |
| -  | 1   | -17 | 0     | 2.40  | 0.27 |
| 1. | -17 | 1   | 8.29  | 0.47  |      |
| -  | 1   | -17 | -1    | 7.33  | 0.46 |
| 1. | -17 | 2   | 1.07  | 0.25  |      |
| -  | 1   | -17 | -2    | 1.25  | 0.25 |
| -  | 1   | -17 | -3    | -0.01 | 0.24 |
| 1. | -17 | 3   | 0.14  | 0.28  |      |
| -  | 1   | -17 | -4    | 3.19  | 0.39 |
| 1. | -17 | 4   | 3.75  | 0.47  |      |
| 1. | -17 | 5   | 8.15  | 0.58  |      |
| -  | 1   | -17 | -5    | 7.87  | 0.46 |
| 1. | -17 | 6   | 0.29  | 0.35  |      |
| -  | 1   | -17 | -6    | 0.12  | 0.27 |
| 1. | -17 | 7   | 1.25  | 0.38  |      |
| -  | 1   | -17 | -7    | 1.20  | 0.28 |
| 1. | -17 | 8   | 0.83  | 0.41  |      |

|   |    |     |     |       |      |
|---|----|-----|-----|-------|------|
| - | 1  | -17 | -8  | 0.55  | 0.31 |
|   | 1. | -17 | 9   | 0.30  | 0.43 |
| - | 1  | -17 | -9  | 0.19  | 0.32 |
|   | 1. | 18  | -10 | 1.17  | 0.37 |
|   | 1. | -18 | -9  | 0.13  | 0.33 |
| - | 1  | -18 | 9   | 0.33  | 0.44 |
|   | 1. | -18 | -8  | 0.02  | 0.31 |
| - | 1  | -18 | 8   | 0.00  | 0.40 |
|   | 1. | -18 | -7  | 0.03  | 0.29 |
| - | 1  | -18 | 7   | 0.05  | 0.38 |
|   | 1. | -18 | -6  | 1.72  | 0.30 |
| - | 1  | -18 | 6   | 2.19  | 0.38 |
|   | 1. | -18 | -5  | 0.13  | 0.27 |
|   | 1. | 18  | -4  | 0.26  | 0.28 |
|   | 1. | -18 | -4  | -0.05 | 0.26 |
|   | 1. | 18  | -3  | 0.72  | 0.28 |
| - | 1  | -18 | 3   | 0.40  | 0.24 |
|   | 1. | -18 | -3  | 0.86  | 0.24 |
|   | 1. | -18 | -2  | 2.53  | 0.26 |
| - | 1  | -18 | 2   | 2.27  | 0.27 |
|   | 1. | -18 | -1  | 0.43  | 0.23 |
| - | 1  | -18 | 1   | -0.01 | 0.23 |
| - | 1  | -18 | 0   | 3.62  | 0.38 |
|   | 1. | -18 | 0   | 4.14  | 0.35 |
| - | 1  | -18 | -1  | -0.01 | 0.25 |
|   | 1. | -18 | 1   | -0.09 | 0.23 |
|   | 1. | -18 | 2   | 0.82  | 0.25 |
| - | 1  | -18 | -2  | 0.66  | 0.26 |
| - | 1  | -18 | -3  | 0.39  | 0.24 |
|   | 1. | -18 | 4   | 1.18  | 0.32 |
| - | 1  | -18 | -4  | 0.77  | 0.26 |
| - | 1  | -18 | -5  | 0.51  | 0.28 |
|   | 1. | -18 | 5   | 0.72  | 0.36 |
| - | 1  | -18 | -6  | 0.41  | 0.27 |
|   | 1. | -18 | 6   | 0.70  | 0.37 |
|   | 1. | -18 | 7   | 0.27  | 0.39 |
| - | 1  | -18 | -7  | -0.04 | 0.28 |
|   | 1. | -18 | 8   | 2.03  | 0.44 |
| - | 1  | -18 | -8  | 1.73  | 0.34 |
|   | 1. | -18 | 9   | 0.49  | 0.46 |
|   | 1. | -19 | -8  | -0.02 | 0.32 |
| - | 1  | -19 | 8   | 0.16  | 0.45 |
| - | 1  | -19 | 7   | 1.82  | 0.42 |
|   | 1. | -19 | -7  | 1.68  | 0.31 |
|   | 1. | -19 | -6  | 1.00  | 0.30 |
| - | 1  | -19 | 6   | 0.37  | 0.40 |
| - | 1  | -19 | 5   | 2.77  | 0.39 |
|   | 1. | -19 | -5  | 2.18  | 0.31 |
|   | 1. | -19 | -4  | 2.91  | 0.32 |
| - | 1  | -19 | 3   | -0.14 | 0.26 |
|   | 1. | -19 | -3  | 0.01  | 0.25 |
| - | 1  | -19 | 2   | 0.00  | 0.25 |
|   | 1. | -19 | -1  | 0.81  | 0.25 |
| - | 1  | -19 | 1   | 0.06  | 0.25 |

|   |    |     |    |       |      |
|---|----|-----|----|-------|------|
| - | 1  | -19 | 0  | 0.57  | 0.27 |
|   | 1. | -19 | 0  | 0.97  | 0.26 |
|   | 1. | -19 | 1  | 2.77  | 0.28 |
| - | 1  | -19 | -1 | 2.39  | 0.30 |
|   | 1. | -19 | 2  | 0.34  | 0.28 |
| - | 1  | -19 | -2 | 0.55  | 0.28 |
|   | 1. | -19 | 3  | -0.38 | 0.28 |
| - | 1  | -19 | -3 | 0.08  | 0.27 |
| - | 1  | -19 | -4 | 0.10  | 0.29 |
|   | 1. | -19 | 5  | 3.10  | 0.41 |
| - | 1  | -19 | -5 | 2.61  | 0.33 |
| - | 1  | -19 | -6 | 0.61  | 0.31 |
|   | 1. | -19 | 6  | 0.84  | 0.41 |
|   | 1. | -19 | 7  | 0.96  | 0.41 |
| - | 1  | -19 | -7 | 0.55  | 0.30 |
|   | 1. | -19 | 8  | 0.31  | 0.46 |
|   | 1. | -20 | -7 | -0.25 | 0.32 |
| - | 1  | -20 | 7  | -0.55 | 0.40 |
|   | 1. | -20 | -6 | 0.19  | 0.31 |
| - | 1  | -20 | 6  | 0.38  | 0.41 |
|   | 1. | -20 | -5 | -0.02 | 0.27 |
| - | 1  | -20 | 5  | -0.07 | 0.36 |
|   | 1. | -20 | -4 | 1.13  | 0.31 |
|   | 1. | -20 | -3 | 0.24  | 0.27 |
|   | 1. | -20 | -2 | 0.26  | 0.30 |
| - | 1  | -20 | 2  | 0.39  | 0.27 |
| - | 1  | -20 | 1  | 0.02  | 0.27 |
| - | 1  | -20 | 0  | 0.29  | 0.28 |
| - | 1  | -20 | -1 | 0.33  | 0.29 |
| - | 1  | -20 | -2 | 3.64  | 0.44 |
|   | 1. | -20 | 2  | 3.40  | 0.33 |
| - | 1  | -20 | -3 | 0.21  | 0.28 |
|   | 1. | -20 | 3  | 0.07  | 0.29 |
|   | 1. | -20 | 4  | 0.90  | 0.34 |
| - | 1  | -20 | -4 | 1.41  | 0.32 |
| - | 1  | -20 | -5 | 0.07  | 0.31 |
| - | 1  | -20 | -6 | 0.13  | 0.32 |
|   | 1. | -20 | 6  | 0.15  | 0.40 |
|   | 1. | -20 | 7  | 0.20  | 0.42 |
| - | 1  | -21 | 7  | 0.43  | 0.44 |
|   | 1. | -21 | -5 | 0.98  | 0.33 |
|   | 1. | -21 | -4 | 1.58  | 0.34 |
|   | 1. | -21 | -3 | -0.07 | 0.31 |
| - | 1  | -21 | 2  | 0.00  | 0.29 |
|   | 1. | -21 | -2 | -0.06 | 0.31 |
|   | 1. | -21 | -1 | 0.31  | 0.31 |
| - | 1  | -21 | 1  | 0.45  | 0.30 |
| - | 1  | -21 | 0  | 1.68  | 0.30 |
| - | 1  | -21 | -1 | 0.33  | 0.31 |
| - | 1  | -21 | -2 | 0.02  | 0.32 |
| - | 1  | -21 | -3 | 0.12  | 0.30 |
| - | 1  | -21 | -4 | 0.70  | 0.33 |
| - | 1  | -21 | -5 | 0.25  | 0.31 |
|   | 1. | -22 | -3 | 0.51  | 0.34 |

|    |     |     |        |        |
|----|-----|-----|--------|--------|
| 1. | -22 | -2  | 1.56   | 0.35   |
| 1. | -22 | -1  | 0.40   | 0.33   |
| -  | 1   | -22 | 1      | 0.52   |
| -  | 1   | -22 | 0      | 0.77   |
| 1. | -22 | 0   | 0.66   | 0.33   |
| -  | 1   | -22 | -1     | 0.81   |
| 1. | -22 | 1   | 0.14   | 0.32   |
| 1. | -22 | 2   | 0.35   | 0.33   |
| -  | 1   | -22 | -2     | 1.13   |
| -  | 1   | -22 | -3     | -0.13  |
| 1. | -23 | -1  | 0.28   | 0.35   |
| -  | 1   | -23 | 1      | 0.35   |
| 1. | -23 | 0   | -0.13  | 0.33   |
| -  | 1   | -23 | 0      | 0.22   |
| 1. | -23 | 1   | 0.53   | 0.34   |
| -  | 1   | -23 | -1     | 0.72   |
| 2  | 0   | -15 | -0.13  | 0.35   |
| 2  | 0   | -14 | 5.61   | 0.50   |
| 2  | 0   | -13 | -0.16  | 0.26   |
| 2  | 0   | -12 | 18.60  | 0.76   |
| -  | 2   | 0   | 12     | 19.45  |
| -  | 2   | 0   | 11     | -0.19  |
| 2  | 0   | -11 | -0.08  | 0.22   |
| 2  | 0   | -10 | 1.89   | 0.21   |
| -  | 2   | 0   | 10     | 1.36   |
| -  | 2   | 0   | 9      | -0.01  |
| 2  | 0   | -9  | -0.04  | 0.18   |
| -  | 2   | 0   | 8      | 210.78 |
| 2  | 0   | -7  | 0.06   | 0.11   |
| 2  | 0   | -7  | 0.01   | 0.07   |
| 2  | 0   | -7  | -0.08  | 0.12   |
| 2  | 0   | -6  | 137.88 | 4.98   |
| 2  | 0   | -6  | 136.98 | 4.76   |
| 2  | 0   | -6  | 145.56 | 5.88   |
| 2  | 0   | -5  | 0.11   | 0.04   |
| 2  | 0   | -5  | 0.10   | 0.09   |
| 2  | 0   | -5  | 0.05   | 0.09   |
| 2  | 0   | -4  | 79.55  | 3.33   |
| 2  | 0   | -3  | 0.10   | 0.05   |
| 2  | 0   | -3  | -0.03  | 0.05   |
| -  | 2   | 0   | 3      | 0.09   |
| 2  | 0   | -2  | 287.01 | 11.39  |
| -  | 2   | 0   | 2      | 280.43 |
| 2  | 0   | -2  | 250.68 | 9.26   |
| -  | 2   | 0   | 1      | 0.05   |
| 2  | 0   | -1  | 0.06   | 0.03   |
| -  | 2   | 0   | -1     | 0.01   |
| 2  | 0   | 1   | 0.02   | 0.06   |
| -  | 2   | 0   | -1     | 0.04   |
| -  | 2   | 0   | -2     | 560.44 |
| -  | 2   | 0   | -2     | 557.86 |
| 2  | 0   | 2   | 539.88 | 23.07  |
| 2  | 0   | 3   | -0.03  | 0.04   |
| -  | 2   | 0   | -3     | -0.06  |

|   |   |    |     |       |      |
|---|---|----|-----|-------|------|
| - | 2 | 0  | -3  | 0.16  | 0.06 |
|   | 2 | 0  | 4   | 0.99  | 0.13 |
| - | 2 | 0  | -4  | 1.19  | 0.12 |
| - | 2 | 0  | -5  | -0.08 | 0.09 |
|   | 2 | 0  | 5   | 0.09  | 0.12 |
| - | 2 | 0  | -5  | -0.03 | 0.09 |
| - | 2 | 0  | -6  | 34.19 | 1.20 |
| - | 2 | 0  | -6  | 34.80 | 1.26 |
|   | 2 | 0  | 6   | 34.22 | 1.48 |
| - | 2 | 0  | -7  | -0.07 | 0.14 |
|   | 2 | 0  | 7   | -0.10 | 0.18 |
| - | 2 | 0  | -7  | -0.03 | 0.13 |
| - | 2 | 0  | -8  | 9.77  | 0.46 |
| - | 2 | 0  | -8  | 9.59  | 0.44 |
|   | 2 | 0  | 8   | 10.09 | 0.53 |
|   | 2 | 0  | 9   | 0.10  | 0.24 |
| - | 2 | 0  | -9  | 0.04  | 0.18 |
|   | 2 | 0  | 10  | 3.27  | 0.39 |
| - | 2 | 0  | -10 | 2.45  | 0.25 |
| - | 2 | 0  | -11 | -0.07 | 0.24 |
|   | 2 | 0  | 11  | -0.21 | 0.28 |
| - | 2 | 0  | -12 | 9.03  | 0.52 |
|   | 2 | 0  | 12  | 9.37  | 0.60 |
| - | 2 | 0  | -13 | -0.10 | 0.30 |
| - | 2 | 0  | -14 | 2.47  | 0.37 |
|   | 2 | 1  | -15 | 1.93  | 0.38 |
|   | 2 | -1 | -15 | 1.96  | 0.35 |
|   | 2 | 1  | -14 | -0.29 | 0.31 |
|   | 2 | -1 | -14 | -0.52 | 0.31 |
|   | 2 | 1  | -13 | 4.80  | 0.45 |
|   | 2 | -1 | -13 | 4.43  | 0.39 |
|   | 2 | 1  | -12 | 1.65  | 0.25 |
|   | 2 | -1 | -12 | 1.60  | 0.25 |
| - | 2 | -1 | 12  | 1.56  | 0.28 |
| - | 2 | 1  | 11  | 11.36 | 0.59 |
|   | 2 | 1  | -11 | 11.00 | 0.52 |
| - | 2 | -1 | 11  | 11.73 | 0.63 |
|   | 2 | -1 | -11 | 11.59 | 0.55 |
| - | 2 | 1  | 10  | 1.85  | 0.22 |
|   | 2 | 1  | -10 | 1.76  | 0.21 |
| - | 2 | -1 | 10  | 2.19  | 0.31 |
|   | 2 | -1 | -10 | 1.93  | 0.23 |
| - | 2 | 1  | 9   | 69.28 | 2.82 |
|   | 2 | 1  | -9  | 65.61 | 2.31 |
|   | 2 | -1 | -9  | 66.66 | 2.31 |
| - | 2 | -1 | 9   | 66.30 | 2.83 |
| - | 2 | 1  | 8   | 0.28  | 0.13 |
| - | 2 | 1  | 7   | 24.39 | 1.03 |
|   | 2 | 1  | -7  | 22.93 | 0.86 |
|   | 2 | 1  | -7  | 24.48 | 1.04 |
|   | 2 | 1  | -7  | 24.04 | 0.86 |
|   | 2 | -1 | -7  | 23.63 | 0.87 |
|   | 2 | 1  | -6  | 21.65 | 0.79 |
|   | 2 | 1  | -6  | 22.51 | 0.96 |

|   |    |    |        |        |
|---|----|----|--------|--------|
| 2 | 1  | -6 | 21.41  | 0.78   |
| 2 | -1 | -6 | 22.31  | 0.80   |
| 2 | -1 | -6 | 22.31  | 0.95   |
| 2 | 1  | -5 | 129.16 | 4.73   |
| 2 | 1  | -5 | 128.86 | 4.53   |
| 2 | 1  | -5 | 136.96 | 5.57   |
| 2 | -1 | -5 | 137.95 | 5.57   |
| 2 | 1  | -4 | 13.56  | 0.59   |
| 2 | -1 | -4 | 13.19  | 0.58   |
| 2 | 1  | -3 | 0.80   | 0.08   |
| 2 | 1  | -3 | 0.63   | 0.08   |
| - | 2  | 1  | 3      | 0.77   |
| 2 | -1 | -3 | 0.63   | 0.09   |
| - | 2  | -1 | 3      | 0.72   |
| 2 | -1 | -3 | 0.76   | 0.07   |
| - | 2  | 1  | 2      | 0.12   |
| 2 | 1  | -2 | 0.20   | 0.04   |
| 2 | 1  | -2 | 0.19   | 0.05   |
| - | 2  | -1 | 2      | 0.16   |
| 2 | -1 | -2 | 0.20   | 0.05   |
| 2 | 1  | -1 | 31.47  | 1.14   |
| - | 2  | 1  | 1      | 35.92  |
| 2 | -1 | -1 | 34.26  | 1.15   |
| 2 | -1 | -1 | 33.19  | 1.41   |
| - | 2  | -1 | 1      | 33.44  |
| - | 2  | -1 | 0      | 57.77  |
| 2 | 1  | 1  | 42.55  | 1.93   |
| - | 2  | 1  | -1     | 48.43  |
| - | 2  | 1  | -1     | 45.13  |
| - | 2  | -1 | -1     | 47.15  |
| - | 2  | -1 | -1     | 46.97  |
| 2 | 1  | 2  | 101.89 | 4.50   |
| - | 2  | 1  | -2     | 111.51 |
| - | 2  | 1  | -2     | 103.33 |
| - | 2  | -1 | -2     | 108.63 |
| - | 2  | -1 | -2     | 113.47 |
| - | 2  | 1  | -3     | 47.72  |
| - | 2  | 1  | -3     | 48.23  |
| - | 2  | -1 | -3     | 43.57  |
| - | 2  | -1 | -3     | 50.06  |
| 2 | 1  | 4  | 24.05  | 1.06   |
| - | 2  | 1  | -4     | 21.34  |
| - | 2  | 1  | -4     | 26.32  |
| - | 2  | -1 | -4     | 26.18  |
| 2 | -1 | 4  | 26.12  | 1.07   |
| 2 | 1  | 5  | 33.53  | 1.42   |
| - | 2  | 1  | -5     | 33.53  |
| - | 2  | -1 | -5     | 33.79  |
| 2 | -1 | 5  | 32.79  | 1.42   |
| - | 2  | -1 | -5     | 32.33  |
| 2 | 1  | 6  | 43.15  | 1.86   |
| - | 2  | 1  | -6     | 44.25  |
| - | 2  | 1  | -6     | 44.06  |
| 2 | -1 | 6  | 42.83  | 1.86   |

|   |   |    |     |       |      |
|---|---|----|-----|-------|------|
| - | 2 | -1 | -6  | 44.03 | 1.51 |
| - | 2 | -1 | -6  | 44.48 | 1.59 |
| - | 2 | 1  | -7  | 0.32  | 0.15 |
| - | 2 | 1  | -7  | 0.29  | 0.13 |
|   | 2 | 1  | 7   | 0.35  | 0.17 |
| - | 2 | -1 | -7  | 0.30  | 0.14 |
| - | 2 | -1 | -7  | 0.31  | 0.13 |
|   | 2 | -1 | 7   | 0.38  | 0.17 |
|   | 2 | 1  | 8   | 0.89  | 0.21 |
| - | 2 | 1  | -8  | 0.98  | 0.16 |
| - | 2 | 1  | -8  | 0.87  | 0.18 |
| - | 2 | -1 | -8  | 0.93  | 0.18 |
|   | 2 | -1 | 8   | 0.85  | 0.22 |
| - | 2 | -1 | -8  | 0.81  | 0.16 |
|   | 2 | 1  | 9   | 33.41 | 1.45 |
| - | 2 | 1  | -9  | 32.94 | 1.19 |
|   | 2 | -1 | 9   | 33.08 | 1.45 |
| - | 2 | -1 | -9  | 32.69 | 1.19 |
|   | 2 | 1  | 10  | 1.57  | 0.28 |
| - | 2 | 1  | -10 | 0.96  | 0.23 |
|   | 2 | -1 | 10  | 0.71  | 0.27 |
| - | 2 | -1 | -10 | 0.72  | 0.21 |
| - | 2 | 1  | -11 | 1.01  | 0.25 |
|   | 2 | 1  | 11  | 1.10  | 0.29 |
| - | 2 | -1 | -11 | 1.28  | 0.25 |
|   | 2 | -1 | 11  | 1.17  | 0.31 |
|   | 2 | 1  | 12  | 0.79  | 0.33 |
| - | 2 | 1  | -12 | 0.55  | 0.28 |
|   | 2 | -1 | 12  | 0.65  | 0.34 |
| - | 2 | -1 | -12 | 0.18  | 0.27 |
| - | 2 | 1  | -13 | 14.65 | 0.69 |
| - | 2 | -1 | -13 | 14.04 | 0.68 |
|   | 2 | -1 | 13  | 14.61 | 0.80 |
| - | 2 | 1  | -14 | 0.83  | 0.34 |
| - | 2 | -1 | -14 | 0.45  | 0.34 |
|   | 2 | -2 | -15 | 0.05  | 0.36 |
|   | 2 | 2  | -14 | 0.11  | 0.28 |
|   | 2 | -2 | -14 | 0.13  | 0.32 |
|   | 2 | 2  | -13 | 0.83  | 0.29 |
| - | 2 | -2 | 13  | 1.16  | 0.32 |
|   | 2 | -2 | -13 | 0.58  | 0.29 |
|   | 2 | 2  | -12 | 16.78 | 0.71 |
| - | 2 | -2 | 12  | 17.43 | 0.84 |
|   | 2 | -2 | -12 | 17.10 | 0.73 |
|   | 2 | 2  | -11 | 14.31 | 0.62 |
| - | 2 | -2 | 11  | 14.44 | 0.74 |
|   | 2 | -2 | -11 | 13.80 | 0.62 |
| - | 2 | 2  | 10  | 10.27 | 0.53 |
|   | 2 | 2  | -10 | 10.14 | 0.48 |
| - | 2 | -2 | 10  | 9.98  | 0.55 |
|   | 2 | -2 | -10 | 9.69  | 0.46 |
|   | 2 | 2  | -9  | 8.80  | 0.41 |
| - | 2 | 2  | 9   | 8.65  | 0.46 |
|   | 2 | -2 | -9  | 8.85  | 0.41 |

|   |   |    |    |        |      |
|---|---|----|----|--------|------|
| - | 2 | -2 | 9  | 8.68   | 0.48 |
|   | 2 | 2  | -8 | 30.27  | 1.14 |
| - | 2 | 2  | 8  | 34.53  | 1.39 |
| - | 2 | 2  | 7  | 0.40   | 0.11 |
|   | 2 | 2  | -7 | 0.40   | 0.13 |
|   | 2 | 2  | -7 | 0.32   | 0.14 |
|   | 2 | -2 | -7 | 0.34   | 0.12 |
|   | 2 | -2 | -7 | 0.15   | 0.06 |
|   | 2 | 2  | -6 | 109.55 | 3.90 |
|   | 2 | 2  | -6 | 117.84 | 4.80 |
|   | 2 | -2 | -6 | 116.97 | 4.08 |
|   | 2 | 2  | -5 | 0.31   | 0.10 |
|   | 2 | 2  | -5 | 0.46   | 0.09 |
|   | 2 | -2 | -5 | 0.43   | 0.09 |
|   | 2 | 2  | -4 | 213.35 | 9.04 |
|   | 2 | -2 | -4 | 218.14 | 9.02 |
|   | 2 | 2  | -3 | 222.66 | 9.37 |
|   | 2 | 2  | -3 | 210.31 | 7.60 |
| - | 2 | 2  | 3  | 234.75 | 7.98 |
| - | 2 | -2 | 3  | 219.66 | 7.93 |
|   | 2 | -2 | -3 | 229.93 | 9.54 |
| - | 2 | 2  | 2  | 209.79 | 7.03 |
|   | 2 | 2  | -2 | 193.96 | 6.69 |
|   | 2 | -2 | -2 | 199.22 | 8.21 |
| - | 2 | -2 | 2  | 193.76 | 7.00 |
|   | 2 | -2 | -2 | 185.70 | 7.33 |
|   | 2 | 2  | -1 | 96.94  | 3.20 |
| - | 2 | 2  | 1  | 93.72  | 3.37 |
| - | 2 | -2 | 1  | 97.07  | 3.37 |
|   | 2 | -2 | -1 | 96.20  | 3.21 |
|   | 2 | -2 | -1 | 87.34  | 3.94 |
| - | 2 | 2  | 0  | 0.83   | 0.08 |
|   | 2 | 2  | 0  | 1.12   | 0.09 |
| - | 2 | -2 | 0  | 1.06   | 0.07 |
|   | 2 | -2 | 0  | 0.69   | 0.09 |
| - | 2 | 2  | -1 | 3.41   | 0.14 |
| - | 2 | 2  | -1 | 3.56   | 0.13 |
|   | 2 | 2  | 1  | 2.85   | 0.18 |
| - | 2 | -2 | -1 | 2.70   | 0.13 |
| - | 2 | -2 | -1 | 3.19   | 0.12 |
|   | 2 | -2 | 1  | 3.06   | 0.17 |
| - | 2 | 2  | -2 | 17.24  | 0.59 |
| - | 2 | 2  | -2 | 17.48  | 0.62 |
|   | 2 | 2  | 2  | 15.29  | 0.73 |
| - | 2 | -2 | -2 | 17.53  | 0.58 |
| - | 2 | -2 | -2 | 17.26  | 0.62 |
|   | 2 | 2  | 3  | 0.31   | 0.08 |
| - | 2 | 2  | -3 | 0.35   | 0.07 |
| - | 2 | 2  | -3 | 0.34   | 0.07 |
| - | 2 | -2 | -3 | 0.29   | 0.06 |
| - | 2 | 2  | -4 | 12.38  | 0.51 |
| - | 2 | 2  | -4 | 13.87  | 0.49 |
|   | 2 | -2 | 4  | 14.01  | 0.61 |
| - | 2 | -2 | -4 | 13.59  | 0.48 |

|   |   |    |     |       |      |
|---|---|----|-----|-------|------|
| - | 2 | -2 | -4  | 13.03 | 0.51 |
| - | 2 | 2  | -5  | 0.02  | 0.10 |
|   | 2 | 2  | 5   | -0.03 | 0.12 |
| - | 2 | 2  | -5  | 0.03  | 0.02 |
| - | 2 | -2 | -5  | -0.09 | 0.08 |
| - | 2 | -2 | -5  | -0.03 | 0.09 |
|   | 2 | -2 | 5   | 0.37  | 0.14 |
| - | 2 | 2  | -6  | 61.88 | 2.09 |
| - | 2 | 2  | -6  | 57.22 | 2.19 |
|   | 2 | 2  | 6   | 60.10 | 2.57 |
| - | 2 | -2 | -6  | 61.97 | 2.19 |
| - | 2 | -2 | -6  | 63.33 | 2.09 |
|   | 2 | -2 | 6   | 61.04 | 2.57 |
| - | 2 | 2  | -7  | 11.14 | 0.46 |
|   | 2 | 2  | 7   | 10.80 | 0.54 |
| - | 2 | 2  | -7  | 10.16 | 0.46 |
|   | 2 | -2 | 7   | 11.07 | 0.56 |
| - | 2 | -2 | -7  | 11.06 | 0.46 |
| - | 2 | -2 | -7  | 11.19 | 0.43 |
|   | 2 | 2  | 8   | 11.99 | 0.61 |
| - | 2 | 2  | -8  | 12.18 | 0.51 |
| - | 2 | -2 | -8  | 11.44 | 0.49 |
| - | 2 | -2 | -8  | 12.00 | 0.51 |
|   | 2 | -2 | 8   | 11.59 | 0.61 |
| - | 2 | 2  | -9  | 8.53  | 0.44 |
|   | 2 | 2  | 9   | 9.03  | 0.51 |
|   | 2 | -2 | 9   | 8.65  | 0.53 |
| - | 2 | -2 | -9  | 9.65  | 0.45 |
| - | 2 | -2 | -9  | 8.44  | 0.43 |
| - | 2 | 2  | -10 | 9.78  | 0.49 |
|   | 2 | 2  | 10  | 10.23 | 0.57 |
| - | 2 | -2 | -10 | 9.95  | 0.48 |
|   | 2 | -2 | 10  | 9.80  | 0.59 |
|   | 2 | 2  | 11  | -0.18 | 0.27 |
| - | 2 | 2  | -11 | -0.37 | 0.24 |
| - | 2 | -2 | -11 | -0.18 | 0.23 |
|   | 2 | -2 | 11  | 0.24  | 0.30 |
| - | 2 | 2  | -12 | 2.98  | 0.32 |
| - | 2 | -2 | -12 | 2.86  | 0.31 |
|   | 2 | -2 | 12  | 3.76  | 0.47 |
| - | 2 | 2  | -13 | 0.79  | 0.32 |
|   | 2 | -2 | 13  | 1.17  | 0.37 |
| - | 2 | -2 | -13 | 0.47  | 0.30 |
| - | 2 | 2  | -14 | 0.28  | 0.34 |
| - | 2 | -2 | -14 | -0.05 | 0.33 |
|   | 2 | -3 | -15 | 0.21  | 0.32 |
|   | 2 | 3  | -14 | 0.95  | 0.33 |
| - | 2 | -3 | 14  | 1.20  | 0.34 |
|   | 2 | -3 | -14 | 0.70  | 0.30 |
|   | 2 | 3  | -13 | 5.27  | 0.41 |
| - | 2 | -3 | 13  | 5.58  | 0.49 |
|   | 2 | -3 | -13 | 5.38  | 0.45 |
|   | 2 | 3  | -12 | 1.20  | 0.25 |
|   | 2 | -3 | -12 | 0.78  | 0.27 |

|   |   |    |     |        |       |
|---|---|----|-----|--------|-------|
| - | 2 | -3 | 12  | 1.26   | 0.28  |
|   | 2 | 3  | -11 | 24.76  | 0.93  |
| - | 2 | -3 | 11  | 23.40  | 1.10  |
|   | 2 | -3 | -11 | 24.13  | 0.93  |
|   | 2 | 3  | -10 | 1.80   | 0.23  |
| - | 2 | -3 | 10  | 1.48   | 0.24  |
|   | 2 | -3 | -10 | 1.87   | 0.23  |
|   | 2 | 3  | -9  | 31.60  | 1.16  |
| - | 2 | 3  | 9   | 33.13  | 1.39  |
|   | 2 | -3 | -9  | 32.66  | 1.16  |
| - | 2 | -3 | 9   | 32.49  | 1.42  |
| - | 2 | 3  | 8   | 0.07   | 0.13  |
|   | 2 | 3  | -8  | 0.21   | 0.17  |
|   | 2 | 3  | -8  | 0.15   | 0.14  |
|   | 2 | -3 | -8  | 0.10   | 0.14  |
|   | 2 | -3 | -8  | 0.11   | 0.11  |
|   | 2 | 3  | -7  | 1.91   | 0.20  |
|   | 2 | 3  | -7  | 2.04   | 0.25  |
|   | 2 | -3 | -7  | 2.03   | 0.23  |
|   | 2 | -3 | -7  | 1.79   | 0.17  |
|   | 2 | 3  | -6  | 5.23   | 0.27  |
|   | 2 | 3  | -6  | 5.59   | 0.32  |
| - | 2 | 3  | 6   | 5.43   | 0.27  |
|   | 2 | -3 | -6  | 5.33   | 0.28  |
|   | 2 | 3  | -5  | 99.20  | 4.04  |
|   | 2 | 3  | -5  | 94.83  | 3.28  |
|   | 2 | -3 | -5  | 95.69  | 3.29  |
|   | 2 | 3  | -4  | 8.62   | 0.41  |
|   | 2 | -3 | -4  | 8.51   | 0.37  |
|   | 2 | 3  | -3  | 0.92   | 0.10  |
|   | 2 | 3  | -3  | 0.61   | 0.10  |
|   | 2 | -3 | -3  | 0.69   | 0.07  |
| - | 2 | -3 | 3   | 0.86   | 0.06  |
|   | 2 | 3  | -2  | 35.31  | 1.22  |
| - | 2 | 3  | 2   | 36.71  | 1.29  |
|   | 2 | -3 | -2  | 35.65  | 1.50  |
| - | 2 | -3 | 2   | 36.22  | 1.28  |
|   | 2 | 3  | -1  | 397.79 | 14.04 |
|   | 2 | 3  | -1  | 413.97 | 17.20 |
| - | 2 | -3 | 1   | 420.44 | 15.04 |
|   | 2 | -3 | -1  | 415.58 | 17.16 |
| - | 2 | 3  | 0   | 283.71 | 10.17 |
|   | 2 | 3  | 0   | 276.82 | 11.92 |
|   | 2 | -3 | 0   | 296.74 | 11.91 |
| - | 2 | -3 | 0   | 282.65 | 10.16 |
| - | 2 | 3  | -1  | 0.53   | 0.06  |
|   | 2 | -3 | 1   | 0.37   | 0.07  |
| - | 2 | -3 | -1  | 0.58   | 0.05  |
| - | 2 | 3  | -2  | 57.66  | 1.95  |
|   | 2 | 3  | 2   | 50.28  | 2.30  |
|   | 2 | -3 | 2   | 54.53  | 2.29  |
| - | 2 | -3 | -2  | 56.11  | 1.85  |
|   | 2 | 3  | 3   | 77.16  | 3.60  |
| - | 2 | 3  | -3  | 89.92  | 2.93  |

|   |   |    |     |        |      |
|---|---|----|-----|--------|------|
| - | 2 | 3  | -3  | 89.94  | 3.07 |
| - | 2 | -3 | -3  | 87.21  | 2.92 |
| - | 2 | 3  | -4  | 39.35  | 1.31 |
| - | 2 | 3  | -4  | 33.73  | 1.36 |
|   | 2 | -3 | 4   | 39.11  | 1.61 |
| - | 2 | -3 | -4  | 38.39  | 1.37 |
| - | 2 | -3 | -4  | 38.52  | 1.30 |
| - | 2 | 3  | -5  | 121.27 | 4.05 |
|   | 2 | 3  | 5   | 118.27 | 4.97 |
|   | 2 | -3 | 5   | 117.72 | 4.98 |
| - | 2 | -3 | -5  | 117.35 | 4.24 |
| - | 2 | -3 | -5  | 120.59 | 4.04 |
|   | 2 | 3  | 6   | 4.13   | 0.29 |
| - | 2 | 3  | -6  | 4.34   | 0.24 |
| - | 2 | 3  | -6  | 3.44   | 0.22 |
| - | 2 | -3 | -6  | 4.12   | 0.25 |
| - | 2 | -3 | -6  | 4.17   | 0.22 |
|   | 2 | -3 | 6   | 4.17   | 0.29 |
|   | 2 | 3  | 7   | 10.48  | 0.53 |
| - | 2 | 3  | -7  | 9.59   | 0.44 |
| - | 2 | 3  | -7  | 10.13  | 0.43 |
| - | 2 | -3 | -7  | 10.59  | 0.46 |
|   | 2 | -3 | 7   | 10.66  | 0.55 |
| - | 2 | -3 | -7  | 10.54  | 0.43 |
|   | 2 | 3  | 8   | 6.03   | 0.39 |
| - | 2 | 3  | -8  | 5.84   | 0.35 |
|   | 2 | -3 | 8   | 6.49   | 0.43 |
| - | 2 | -3 | -8  | 6.26   | 0.36 |
| - | 2 | -3 | -8  | 6.18   | 0.34 |
|   | 2 | 3  | 9   | 11.42  | 0.58 |
| - | 2 | 3  | -9  | 11.09  | 0.50 |
|   | 2 | -3 | 9   | 10.75  | 0.61 |
| - | 2 | -3 | -9  | 10.90  | 0.49 |
| - | 2 | -3 | -9  | 11.03  | 0.50 |
| - | 2 | 3  | -10 | 5.78   | 0.39 |
|   | 2 | 3  | 10  | 6.30   | 0.47 |
| - | 2 | -3 | -10 | 5.47   | 0.37 |
|   | 2 | -3 | 10  | 5.26   | 0.47 |
| - | 2 | 3  | -11 | 0.01   | 0.25 |
|   | 2 | -3 | 11  | 0.07   | 0.30 |
| - | 2 | -3 | -11 | 0.31   | 0.24 |
| - | 2 | 3  | -12 | -0.03  | 0.28 |
| - | 2 | -3 | -12 | 0.01   | 0.26 |
|   | 2 | -3 | 12  | 0.05   | 0.35 |
| - | 2 | 3  | -13 | 4.46   | 0.48 |
| - | 2 | -3 | -13 | 4.13   | 0.45 |
|   | 2 | -3 | 13  | 4.60   | 0.54 |
| - | 2 | 3  | -14 | 0.79   | 0.36 |
|   | 2 | -3 | 14  | 0.58   | 0.39 |
| - | 2 | -3 | -14 | 0.02   | 0.33 |
|   | 2 | 4  | -14 | -0.01  | 0.30 |
|   | 2 | -4 | -14 | -0.53  | 0.31 |
| - | 2 | -4 | 14  | 0.01   | 0.33 |
|   | 2 | 4  | -13 | 7.77   | 0.48 |

|   |   |    |     |        |       |
|---|---|----|-----|--------|-------|
| - | 2 | -4 | 13  | 8.66   | 0.58  |
|   | 2 | -4 | -13 | 7.66   | 0.48  |
|   | 2 | 4  | -12 | 12.61  | 0.60  |
| - | 2 | -4 | 12  | 12.88  | 0.70  |
|   | 2 | -4 | -12 | 12.02  | 0.60  |
|   | 2 | 4  | -11 | 3.69   | 0.33  |
|   | 2 | -4 | -11 | 3.44   | 0.37  |
| - | 2 | -4 | 11  | 3.88   | 0.41  |
|   | 2 | 4  | -10 | 5.69   | 0.35  |
| - | 2 | -4 | 10  | 5.84   | 0.44  |
|   | 2 | -4 | -10 | 5.78   | 0.38  |
|   | 2 | 4  | -9  | 3.72   | 0.31  |
|   | 2 | -4 | -9  | 3.50   | 0.31  |
|   | 2 | -4 | -9  | 2.93   | 0.28  |
|   | 2 | 4  | -8  | 31.43  | 1.14  |
| - | 2 | 4  | 8   | 31.54  | 1.36  |
|   | 2 | 4  | -8  | 32.56  | 1.39  |
|   | 2 | -4 | -8  | 32.31  | 1.17  |
|   | 2 | -4 | -8  | 31.96  | 1.14  |
|   | 2 | 4  | -7  | 85.13  | 3.01  |
|   | 2 | 4  | -7  | 87.31  | 3.69  |
|   | 2 | -4 | -7  | 90.89  | 3.14  |
|   | 2 | -4 | -7  | 88.50  | 3.01  |
| - | 2 | 4  | 6   | 27.99  | 1.19  |
|   | 2 | 4  | -6  | 28.51  | 1.21  |
|   | 2 | 4  | -6  | 27.42  | 0.99  |
|   | 2 | -4 | -6  | 28.29  | 0.99  |
|   | 2 | 4  | -5  | 39.00  | 1.34  |
|   | 2 | 4  | -5  | 40.24  | 1.64  |
| - | 2 | 4  | 5   | 36.93  | 1.62  |
|   | 2 | -4 | -5  | 38.43  | 1.34  |
| - | 2 | 4  | 4   | 23.01  | 0.95  |
|   | 2 | 4  | -4  | 20.33  | 0.79  |
|   | 2 | 4  | -4  | 24.48  | 0.98  |
|   | 2 | -4 | -4  | 23.01  | 0.80  |
| - | 2 | -4 | 4   | 23.00  | 0.81  |
|   | 2 | 4  | -3  | 11.26  | 0.39  |
|   | 2 | -4 | -3  | 10.12  | 0.40  |
| - | 2 | -4 | 3   | 10.98  | 0.39  |
| - | 2 | 4  | 2   | 71.47  | 2.48  |
|   | 2 | 4  | -2  | 69.64  | 2.36  |
| - | 2 | -4 | 2   | 71.17  | 2.48  |
|   | 2 | -4 | -2  | 66.11  | 2.89  |
|   | 2 | 4  | -1  | 0.46   | 0.07  |
|   | 2 | 4  | -1  | 0.54   | 0.06  |
| - | 2 | -4 | 1   | 0.63   | 0.08  |
|   | 2 | 4  | 0   | 295.33 | 12.92 |
| - | 2 | 4  | 0   | 307.95 | 11.02 |
| - | 2 | -4 | 0   | 320.18 | 11.02 |
| - | 2 | -4 | 0   | 302.38 | 10.45 |
|   | 2 | -4 | 0   | 319.04 | 12.90 |
|   | 2 | 4  | 1   | 249.48 | 10.36 |
| - | 2 | 4  | -1  | 246.82 | 8.83  |
|   | 2 | -4 | 1   | 253.39 | 10.35 |

|   |   |    |     |        |      |
|---|---|----|-----|--------|------|
| - | 2 | -4 | -1  | 239.39 | 8.37 |
|   | 2 | 4  | 2   | 3.73   | 0.24 |
| - | 2 | 4  | -2  | 4.42   | 0.19 |
| - | 2 | -4 | -2  | 4.02   | 0.16 |
|   | 2 | -4 | 2   | 3.93   | 0.23 |
| - | 2 | 4  | -3  | 24.20  | 0.88 |
|   | 2 | 4  | 3   | 21.83  | 1.04 |
| - | 2 | -4 | -3  | 24.76  | 0.83 |
|   | 2 | -4 | 3   | 25.01  | 1.04 |
| - | 2 | -4 | -3  | 25.17  | 0.89 |
| - | 2 | 4  | -4  | 98.28  | 3.44 |
| - | 2 | -4 | -4  | 102.68 | 3.43 |
| - | 2 | -4 | -4  | 102.55 | 3.61 |
|   | 2 | 4  | 5   | 16.62  | 0.74 |
| - | 2 | 4  | -5  | 17.29  | 0.62 |
| - | 2 | -4 | -5  | 16.50  | 0.60 |
| - | 2 | -4 | -5  | 16.65  | 0.64 |
|   | 2 | -4 | 5   | 16.69  | 0.75 |
| - | 2 | 4  | -6  | 67.98  | 2.40 |
|   | 2 | 4  | 6   | 73.49  | 2.95 |
| - | 2 | 4  | -6  | 60.17  | 2.51 |
| - | 2 | -4 | -6  | 72.83  | 2.40 |
| - | 2 | -4 | -6  | 71.99  | 2.52 |
|   | 2 | -4 | 6   | 74.38  | 2.96 |
| - | 2 | 4  | -7  | 8.76   | 0.37 |
| - | 2 | 4  | -7  | 8.33   | 0.38 |
|   | 2 | 4  | 7   | 8.55   | 0.46 |
| - | 2 | -4 | -7  | 8.34   | 0.41 |
| - | 2 | -4 | -7  | 8.51   | 0.38 |
|   | 2 | -4 | 7   | 8.49   | 0.49 |
|   | 2 | 4  | 8   | 2.93   | 0.32 |
| - | 2 | 4  | -8  | 2.83   | 0.26 |
| - | 2 | -4 | -8  | 2.74   | 0.27 |
| - | 2 | -4 | -8  | 2.84   | 0.26 |
|   | 2 | -4 | 8   | 2.96   | 0.32 |
|   | 2 | 4  | 9   | 1.29   | 0.23 |
| - | 2 | 4  | -9  | 0.92   | 0.20 |
|   | 2 | -4 | 9   | 1.02   | 0.27 |
| - | 2 | -4 | -9  | 1.03   | 0.20 |
| - | 2 | -4 | -9  | 0.84   | 0.19 |
| - | 2 | 4  | -10 | 1.16   | 0.24 |
| - | 2 | -4 | -10 | 1.27   | 0.23 |
|   | 2 | -4 | 10  | 1.73   | 0.28 |
| - | 2 | 4  | -11 | 6.81   | 0.42 |
| - | 2 | -4 | -11 | 6.94   | 0.43 |
|   | 2 | -4 | 11  | 6.79   | 0.53 |
| - | 2 | 4  | -12 | 2.27   | 0.30 |
| - | 2 | -4 | -12 | 2.34   | 0.30 |
|   | 2 | -4 | 12  | 2.52   | 0.38 |
| - | 2 | 4  | -13 | 0.24   | 0.32 |
| - | 2 | -4 | -13 | -0.17  | 0.29 |
|   | 2 | -4 | 13  | 0.02   | 0.38 |
|   | 2 | -4 | 14  | 0.54   | 0.42 |
| - | 2 | -4 | -14 | 0.32   | 0.33 |

|   |   |    |     |        |      |
|---|---|----|-----|--------|------|
| - | 2 | -5 | 15  | 1.20   | 0.41 |
|   | 2 | 5  | -14 | 3.19   | 0.39 |
|   | 2 | -5 | -14 | 3.18   | 0.37 |
| - | 2 | -5 | 14  | 3.29   | 0.41 |
|   | 2 | 5  | -13 | 0.79   | 0.30 |
|   | 2 | -5 | -13 | 0.46   | 0.30 |
| - | 2 | -5 | 13  | 0.50   | 0.32 |
|   | 2 | 5  | -12 | 0.33   | 0.25 |
| - | 2 | -5 | 12  | 0.49   | 0.30 |
|   | 2 | -5 | -12 | -0.24  | 0.26 |
|   | 2 | 5  | -11 | 0.19   | 0.22 |
| - | 2 | -5 | 11  | 0.10   | 0.27 |
|   | 2 | -5 | -11 | 0.08   | 0.22 |
|   | 2 | 5  | -10 | 23.37  | 0.89 |
|   | 2 | -5 | -10 | 23.21  | 0.88 |
| - | 2 | -5 | 10  | 22.63  | 1.07 |
|   | 2 | 5  | -9  | 3.93   | 0.32 |
|   | 2 | -5 | -9  | 3.84   | 0.33 |
|   | 2 | -5 | -9  | 4.17   | 0.29 |
|   | 2 | 5  | -8  | 18.18  | 0.86 |
|   | 2 | 5  | -8  | 18.50  | 0.71 |
|   | 2 | -5 | -8  | 19.16  | 0.71 |
|   | 2 | -5 | -8  | 19.72  | 0.72 |
| - | 2 | 5  | 7   | 8.22   | 0.41 |
|   | 2 | 5  | -7  | 8.79   | 0.39 |
|   | 2 | 5  | -7  | 8.81   | 0.45 |
|   | 2 | -5 | -7  | 9.36   | 0.39 |
|   | 2 | -5 | -7  | 8.40   | 0.40 |
| - | 2 | 5  | 6   | 19.50  | 0.88 |
|   | 2 | 5  | -6  | 20.87  | 0.75 |
|   | 2 | 5  | -6  | 21.97  | 0.93 |
|   | 2 | -5 | -6  | 21.10  | 0.75 |
| - | 2 | 5  | 5   | 55.28  | 2.41 |
|   | 2 | 5  | -5  | 56.90  | 1.98 |
|   | 2 | 5  | -5  | 59.72  | 2.44 |
|   | 2 | -5 | -5  | 59.58  | 1.99 |
|   | 2 | 5  | -4  | 4.10   | 0.20 |
| - | 2 | -5 | 4   | 4.01   | 0.16 |
|   | 2 | -5 | -4  | 3.90   | 0.22 |
|   | 2 | 5  | -3  | 23.33  | 1.03 |
|   | 2 | 5  | -3  | 21.82  | 0.83 |
| - | 2 | -5 | 3   | 25.31  | 0.86 |
|   | 2 | -5 | -3  | 25.78  | 0.85 |
|   | 2 | 5  | -2  | 1.52   | 0.10 |
| - | 2 | 5  | 2   | 1.77   | 0.13 |
| - | 2 | -5 | 2   | 1.54   | 0.10 |
|   | 2 | -5 | -2  | 1.65   | 0.13 |
|   | 2 | -5 | -2  | 1.38   | 0.09 |
|   | 2 | 5  | -1  | 21.15  | 1.03 |
|   | 2 | 5  | -1  | 25.85  | 0.83 |
| - | 2 | -5 | 1   | 25.22  | 0.88 |
|   | 2 | -5 | -1  | 23.83  | 0.84 |
|   | 2 | -5 | -1  | 25.43  | 1.02 |
|   | 2 | 5  | 0   | 181.86 | 7.69 |

|   |   |    |     |        |      |
|---|---|----|-----|--------|------|
| - | 2 | -5 | 0   | 184.52 | 6.55 |
| - | 2 | -5 | 0   | 181.92 | 6.21 |
|   | 2 | -5 | 0   | 185.03 | 7.67 |
|   | 2 | 5  | 1   | 125.11 | 5.09 |
|   | 2 | -5 | 1   | 122.70 | 5.10 |
| - | 2 | -5 | -1  | 116.95 | 4.12 |
|   | 2 | 5  | 2   | 39.44  | 1.65 |
|   | 2 | -5 | 2   | 39.22  | 1.65 |
| - | 2 | -5 | -2  | 38.53  | 1.33 |
|   | 2 | 5  | 3   | 60.35  | 2.92 |
|   | 2 | -5 | 3   | 73.56  | 2.93 |
| - | 2 | -5 | -3  | 71.96  | 2.37 |
| - | 2 | -5 | -3  | 73.38  | 2.50 |
| - | 2 | -5 | -4  | 82.18  | 2.69 |
| - | 2 | -5 | -4  | 81.77  | 2.83 |
|   | 2 | -5 | 4   | 73.65  | 3.32 |
| - | 2 | 5  | -6  | 0.55   | 0.10 |
|   | 2 | 5  | 6   | 0.63   | 0.16 |
| - | 2 | -5 | -6  | 0.38   | 0.14 |
| - | 2 | -5 | -6  | 0.47   | 0.12 |
|   | 2 | -5 | 6   | 0.14   | 0.14 |
|   | 2 | 5  | 7   | 8.52   | 0.44 |
| - | 2 | 5  | -7  | 7.08   | 0.38 |
| - | 2 | 5  | -7  | 7.51   | 0.34 |
| - | 2 | -5 | -7  | 7.58   | 0.38 |
|   | 2 | -5 | 7   | 7.48   | 0.44 |
| - | 2 | -5 | -7  | 7.88   | 0.35 |
|   | 2 | 5  | 8   | 0.54   | 0.20 |
| - | 2 | 5  | -8  | 0.56   | 0.18 |
|   | 2 | -5 | 8   | 0.36   | 0.21 |
| - | 2 | -5 | -8  | 0.24   | 0.17 |
| - | 2 | -5 | -8  | 0.47   | 0.16 |
| - | 2 | 5  | -9  | 8.01   | 0.44 |
| - | 2 | -5 | -9  | 8.11   | 0.41 |
| - | 2 | -5 | -9  | 7.88   | 0.42 |
|   | 2 | -5 | 9   | 8.04   | 0.53 |
| - | 2 | 5  | -10 | 9.59   | 0.48 |
| - | 2 | -5 | -10 | 10.29  | 0.48 |
|   | 2 | -5 | 10  | 9.44   | 0.56 |
| - | 2 | 5  | -11 | 1.00   | 0.26 |
|   | 2 | -5 | 11  | 1.21   | 0.33 |
| - | 2 | -5 | -11 | 1.06   | 0.25 |
| - | 2 | 5  | -12 | 5.11   | 0.47 |
|   | 2 | -5 | 12  | 4.97   | 0.47 |
| - | 2 | -5 | -12 | 4.86   | 0.41 |
| - | 2 | 5  | -13 | 1.37   | 0.34 |
| - | 2 | -5 | -13 | 1.09   | 0.31 |
|   | 2 | -5 | 13  | 1.26   | 0.40 |
|   | 2 | -5 | 14  | 1.89   | 0.44 |
| - | 2 | -5 | -14 | 1.57   | 0.34 |
| - | 2 | -6 | 15  | 0.44   | 0.41 |
|   | 2 | 6  | -14 | 1.27   | 0.36 |
|   | 2 | -6 | -14 | 0.82   | 0.34 |
| - | 2 | -6 | 14  | 1.34   | 0.39 |

|   |    |     |        |        |      |
|---|----|-----|--------|--------|------|
| 2 | 6  | -13 | 5.87   | 0.49   |      |
| 2 | -6 | -13 | 5.47   | 0.47   |      |
| - | 2  | -6  | 13     | 5.94   | 0.55 |
| 2 | 6  | -12 | 1.51   | 0.29   |      |
| - | 2  | -6  | 12     | 1.39   | 0.33 |
| 2 | -6 | -12 | 0.91   | 0.26   |      |
| 2 | 6  | -11 | 6.88   | 0.44   |      |
| 2 | -6 | -11 | 6.44   | 0.43   |      |
| - | 2  | -6  | 11     | 6.36   | 0.51 |
| 2 | 6  | -10 | 1.74   | 0.25   |      |
| - | 2  | -6  | 10     | 1.51   | 0.28 |
| 2 | -6 | -10 | 1.53   | 0.23   |      |
| 2 | 6  | -9  | 0.87   | 0.19   |      |
| 2 | -6 | -9  | 0.74   | 0.17   |      |
| 2 | -6 | -9  | 0.78   | 0.19   |      |
| 2 | 6  | -8  | 1.38   | 0.21   |      |
| 2 | 6  | -8  | 1.43   | 0.19   |      |
| 2 | -6 | -8  | 1.49   | 0.18   |      |
| 2 | -6 | -8  | 1.47   | 0.16   |      |
| 2 | 6  | -7  | 24.15  | 0.91   |      |
| 2 | 6  | -7  | 25.06  | 1.11   |      |
| 2 | -6 | -7  | 26.27  | 0.94   |      |
| 2 | -6 | -7  | 24.51  | 0.90   |      |
| 2 | 6  | -6  | 10.09  | 0.40   |      |
| 2 | 6  | -6  | 8.87   | 0.48   |      |
| 2 | -6 | -6  | 9.87   | 0.40   |      |
| 2 | 6  | -5  | 41.15  | 1.41   |      |
| - | 2  | -6  | 5      | 40.92  | 1.45 |
| 2 | -6 | -5  | 40.28  | 1.41   |      |
| 2 | 6  | -4  | 116.89 | 4.74   |      |
| 2 | 6  | -4  | 113.07 | 3.85   |      |
| - | 2  | -6  | 4      | 113.42 | 4.03 |
| 2 | -6 | -4  | 110.04 | 3.85   |      |
| 2 | 6  | -3  | 176.23 | 7.24   |      |
| 2 | -6 | -3  | 169.54 | 5.86   |      |
| - | 2  | -6  | 3      | 172.69 | 6.16 |
| 2 | 6  | -2  | 29.40  | 0.99   |      |
| 2 | 6  | -2  | 28.71  | 1.22   |      |
| 2 | -6 | -2  | 27.86  | 0.99   |      |
| 2 | -6 | -2  | 29.33  | 1.20   |      |
| - | 2  | -6  | 2      | 28.09  | 1.03 |
| 2 | -6 | -1  | 4.25   | 0.19   |      |
| - | 2  | -6  | 1      | 3.75   | 0.18 |
| 2 | -6 | -1  | 3.84   | 0.20   |      |
| - | 2  | 6   | 0      | 5.12   | 0.24 |
| 2 | 6  | 0   | 4.94   | 0.27   |      |
| 2 | -6 | 0   | 5.52   | 0.27   |      |
| - | 2  | -6  | 0      | 6.15   | 0.24 |
| - | 2  | -6  | 0      | 5.89   | 0.21 |
| 2 | 6  | 1   | 17.17  | 0.74   |      |
| - | 2  | -6  | -1     | 16.87  | 0.59 |
| - | 2  | -6  | -1     | 17.28  | 0.64 |
| 2 | -6 | 1   | 17.17  | 0.74   |      |
| - | 2  | 6   | -2     | 50.70  | 1.69 |

|   |    |     |       |       |      |
|---|----|-----|-------|-------|------|
| 2 | 6  | 2   | 49.63 | 2.08  |      |
| - | 2  | -6  | -2    | 47.52 | 1.68 |
| 2 | -6 | 2   | 49.54 | 2.07  |      |
| - | 2  | 6   | -3    | 31.90 | 1.07 |
| 2 | 6  | 3   | 26.08 | 1.30  |      |
| - | 2  | -6  | -3    | 31.32 | 1.12 |
| 2 | -6 | 3   | 31.89 | 1.31  |      |
| - | 2  | -6  | -3    | 31.74 | 1.05 |
| - | 2  | 6   | -4    | 5.90  | 0.28 |
| - | 2  | 6   | -4    | 5.25  | 0.25 |
| - | 2  | -6  | -4    | 5.76  | 0.28 |
| 2 | -6 | 4   | 6.02  | 0.34  |      |
| - | 2  | -6  | -4    | 6.02  | 0.25 |
| 2 | 6  | 5   | 1.55  | 0.18  |      |
| - | 2  | 6   | -5    | 1.74  | 0.16 |
| - | 2  | -6  | -5    | 1.62  | 0.16 |
| - | 2  | -6  | -5    | 1.29  | 0.15 |
| - | 2  | 6   | -6    | 10.27 | 0.43 |
| 2 | 6  | 6   | 11.67 | 0.54  |      |
| - | 2  | -6  | -6    | 10.16 | 0.47 |
| - | 2  | -6  | -6    | 10.37 | 0.42 |
| - | 2  | 6   | -7    | 5.28  | 0.31 |
| 2 | 6  | 7   | 5.79  | 0.37  |      |
| - | 2  | -6  | -7    | 5.15  | 0.33 |
| - | 2  | -6  | -7    | 5.31  | 0.31 |
| 2 | -6 | 7   | 4.94  | 0.40  |      |
| - | 2  | 6   | -8    | 0.33  | 0.19 |
| 2 | 6  | 8   | 0.53  | 0.20  |      |
| - | 2  | -6  | -8    | 0.16  | 0.17 |
| 2 | -6 | 8   | 0.15  | 0.24  |      |
| - | 2  | -6  | -8    | 0.12  | 0.17 |
| - | 2  | 6   | -9    | 1.36  | 0.22 |
| - | 2  | -6  | -9    | 1.75  | 0.22 |
| 2 | -6 | 9   | 1.64  | 0.29  |      |
| - | 2  | -6  | -9    | 1.69  | 0.21 |
| - | 2  | 6   | -10   | 7.27  | 0.41 |
| - | 2  | -6  | -10   | 6.69  | 0.41 |
| - | 2  | -6  | -10   | 6.95  | 0.43 |
| 2 | -6 | 10  | 6.55  | 0.53  |      |
| - | 2  | 6   | -11   | 12.44 | 0.61 |
| - | 2  | -6  | -11   | 12.26 | 0.57 |
| 2 | -6 | 11  | 11.96 | 0.68  |      |
| - | 2  | 6   | -12   | 2.10  | 0.31 |
| 2 | -6 | 12  | 2.49  | 0.40  |      |
| - | 2  | -6  | -12   | 1.89  | 0.31 |
| - | 2  | 6   | -13   | 0.32  | 0.31 |
| 2 | -6 | 13  | 1.06  | 0.41  |      |
| - | 2  | -6  | -13   | 0.15  | 0.30 |
| 2 | 7  | -14 | 11.79 | 0.67  |      |
| - | 2  | -7  | 14    | 11.37 | 0.76 |
| 2 | -7 | -14 | 10.73 | 0.63  |      |
| 2 | 7  | -13 | 0.40  | 0.32  |      |
| 2 | -7 | -13 | 0.26  | 0.30  |      |
| - | 2  | -7  | 13    | 0.29  | 0.35 |

|   |    |     |        |        |      |
|---|----|-----|--------|--------|------|
| 2 | 7  | -12 | 0.26   | 0.28   |      |
| 2 | -7 | -12 | -0.25  | 0.27   |      |
| - | 2  | -7  | 12     | -0.07  | 0.29 |
| 2 | 7  | -11 | 3.87   | 0.40   |      |
| - | 2  | -7  | 11     | 3.86   | 0.46 |
| 2 | -7 | -11 | 3.78   | 0.38   |      |
| 2 | 7  | -10 | 25.28  | 0.96   |      |
| 2 | -7 | -10 | 25.99  | 0.97   |      |
| - | 2  | -7  | 10     | 25.72  | 1.19 |
| 2 | 7  | -9  | 3.91   | 0.34   |      |
| 2 | 7  | -9  | 3.69   | 0.38   |      |
| 2 | -7 | -9  | 3.39   | 0.30   |      |
| 2 | -7 | -9  | 3.31   | 0.30   |      |
| 2 | 7  | -8  | 1.85   | 0.21   |      |
| 2 | 7  | -8  | 1.75   | 0.25   |      |
| 2 | -7 | -8  | 1.91   | 0.18   |      |
| 2 | -7 | -8  | 1.86   | 0.21   |      |
| 2 | 7  | -7  | 5.89   | 0.40   |      |
| 2 | 7  | -7  | 7.49   | 0.36   |      |
| 2 | -7 | -7  | 7.87   | 0.36   |      |
| 2 | -7 | -7  | 7.16   | 0.35   |      |
| 2 | 7  | -6  | 40.21  | 1.41   |      |
| 2 | -7 | -6  | 40.74  | 1.41   |      |
| 2 | 7  | -5  | 0.23   | 0.12   |      |
| 2 | 7  | -5  | 0.44   | 0.16   |      |
| - | 2  | -7  | 5      | 0.27   | 0.06 |
| 2 | -7 | -5  | 0.56   | 0.13   |      |
| 2 | 7  | -4  | 34.49  | 1.44   |      |
| 2 | 7  | -4  | 33.85  | 1.17   |      |
| 2 | -7 | -4  | 33.02  | 1.17   |      |
| - | 2  | -7  | 4      | 33.37  | 1.21 |
| 2 | 7  | -3  | 2.71   | 0.21   |      |
| - | 2  | -7  | 3      | 2.41   | 0.14 |
| 2 | -7 | -3  | 2.36   | 0.20   |      |
| 2 | 7  | -2  | 18.73  | 0.81   |      |
| 2 | 7  | -2  | 18.73  | 0.65   |      |
| 2 | -7 | -2  | 18.61  | 0.67   |      |
| 2 | -7 | -2  | 18.76  | 0.79   |      |
| - | 2  | -7  | 2      | 18.51  | 0.68 |
| - | 2  | 7   | 1      | 3.11   | 0.17 |
| 2 | 7  | -1  | 2.89   | 0.21   |      |
| 2 | -7 | -1  | 2.78   | 0.17   |      |
| - | 2  | -7  | 1      | 2.92   | 0.17 |
| 2 | -7 | -1  | 2.95   | 0.18   |      |
| - | 2  | 7   | 0      | 101.49 | 3.64 |
| 2 | -7 | 0   | 100.76 | 4.27   |      |
| - | 2  | -7  | 0      | 103.91 | 3.64 |
| - | 2  | -7  | 0      | 102.32 | 3.46 |
| - | 2  | 7   | -1     | 56.25  | 1.99 |
| 2 | -7 | 1   | 54.99  | 2.33   |      |
| - | 2  | -7  | -1     | 53.44  | 1.89 |
| - | 2  | -7  | -1     | 57.40  | 1.99 |
| - | 2  | 7   | -2     | 0.84   | 0.10 |
| 2 | 7  | 2   | 1.25   | 0.14   |      |

|   |    |     |     |       |      |
|---|----|-----|-----|-------|------|
| - | 2  | 7   | -2  | 0.78  | 0.11 |
| - | 2  | -7  | -2  | 0.85  | 0.07 |
| 2 | -7 | 2   |     | 0.91  | 0.12 |
| - | 2  | 7   | -3  | 68.60 | 2.51 |
| - | 2  | 7   | -3  | 69.10 | 2.40 |
| - | 2  | -7  | -3  | 70.27 | 2.39 |
| - | 2  | -7  | -3  | 72.20 | 2.52 |
| 2 | -7 | 3   |     | 71.51 | 2.96 |
| - | 2  | 7   | -4  | 21.85 | 0.82 |
| - | 2  | 7   | -4  | 22.12 | 0.79 |
| - | 2  | -7  | -4  | 22.23 | 0.77 |
| 2 | -7 | 4   |     | 22.05 | 0.97 |
| - | 2  | -7  | -4  | 22.00 | 0.83 |
| 2 | 7  | 5   |     | 8.44  | 0.47 |
| - | 2  | 7   | -5  | 9.19  | 0.38 |
| - | 2  | -7  | -5  | 9.55  | 0.36 |
| 2 | -7 | 5   |     | 8.30  | 0.47 |
| - | 2  | -7  | -5  | 9.00  | 0.41 |
| 2 | 7  | 6   |     | 9.21  | 0.47 |
| - | 2  | 7   | -6  | 8.44  | 0.37 |
| - | 2  | -7  | -6  | 8.58  | 0.42 |
| - | 2  | -7  | -6  | 8.46  | 0.37 |
| 2 | 7  | 7   |     | 2.52  | 0.29 |
| - | 2  | 7   | -7  | 1.79  | 0.21 |
| - | 2  | -7  | -7  | 2.02  | 0.23 |
| 2 | -7 | 7   |     | 1.72  | 0.25 |
| - | 2  | -7  | -7  | 1.86  | 0.20 |
| - | 2  | 7   | -8  | 25.98 | 0.95 |
| 2 | -7 | 8   |     | 24.84 | 1.16 |
| - | 2  | -7  | -8  | 26.09 | 0.99 |
| - | 2  | -7  | -8  | 25.93 | 0.93 |
| - | 2  | 7   | -9  | 5.27  | 0.38 |
| 2 | -7 | 9   |     | 4.34  | 0.41 |
| - | 2  | -7  | -9  | 4.98  | 0.34 |
| - | 2  | -7  | -9  | 4.37  | 0.37 |
| - | 2  | 7   | -10 | 7.87  | 0.46 |
| 2 | -7 | 10  |     | 7.30  | 0.55 |
| - | 2  | -7  | -10 | 6.69  | 0.48 |
| - | 2  | -7  | -10 | 7.33  | 0.42 |
| - | 2  | 7   | -11 | 0.53  | 0.28 |
| - | 2  | -7  | -11 | 0.36  | 0.24 |
| 2 | -7 | 11  |     | 0.76  | 0.31 |
| - | 2  | 7   | -12 | 1.01  | 0.32 |
| 2 | -7 | 12  |     | 0.93  | 0.38 |
| - | 2  | -7  | -12 | 0.57  | 0.27 |
| - | 2  | 7   | -13 | 3.18  | 0.39 |
| 2 | -7 | 13  |     | 4.13  | 0.58 |
| 2 | 8  | -14 |     | -0.05 | 0.36 |
| 2 | -8 | -14 |     | -0.12 | 0.33 |
| - | 2  | -8  | 14  | 0.30  | 0.41 |
| 2 | 8  | -13 |     | 3.71  | 0.44 |
| - | 2  | -8  | 13  | 4.82  | 0.56 |
| 2 | -8 | -13 |     | 4.18  | 0.44 |
| 2 | 8  | -12 |     | 0.33  | 0.27 |

|   |   |    |     |        |      |
|---|---|----|-----|--------|------|
| - | 2 | -8 | 12  | 0.10   | 0.31 |
|   | 2 | -8 | -12 | -0.36  | 0.27 |
|   | 2 | 8  | -11 | 8.58   | 0.51 |
| - | 2 | -8 | 11  | 8.16   | 0.55 |
|   | 2 | -8 | -11 | 8.50   | 0.49 |
|   | 2 | 8  | -10 | 0.12   | 0.24 |
| - | 2 | -8 | 10  | 0.38   | 0.26 |
|   | 2 | -8 | -10 | 0.17   | 0.21 |
|   | 2 | -8 | -10 | 0.14   | 0.23 |
|   | 2 | 8  | -9  | 25.19  | 1.17 |
|   | 2 | 8  | -9  | 25.42  | 0.98 |
|   | 2 | -8 | -9  | 27.47  | 1.01 |
|   | 2 | -8 | -9  | 26.10  | 0.97 |
|   | 2 | 8  | -8  | 0.04   | 0.19 |
|   | 2 | 8  | -8  | -0.14  | 0.23 |
|   | 2 | -8 | -8  | 0.08   | 0.15 |
|   | 2 | -8 | -8  | 0.00   | 0.19 |
|   | 2 | 8  | -7  | 55.07  | 1.87 |
|   | 2 | 8  | -7  | 48.11  | 2.29 |
|   | 2 | -8 | -7  | 55.42  | 1.87 |
|   | 2 | -8 | -7  | 56.52  | 1.96 |
|   | 2 | 8  | -6  | 11.39  | 0.46 |
|   | 2 | -8 | -6  | 11.93  | 0.49 |
|   | 2 | 8  | -5  | 3.28   | 0.23 |
|   | 2 | 8  | -5  | 3.05   | 0.27 |
| - | 2 | -8 | 5   | 2.86   | 0.16 |
|   | 2 | -8 | -5  | 3.15   | 0.25 |
|   | 2 | 8  | -4  | 0.01   | 0.10 |
|   | 2 | 8  | -4  | 0.17   | 0.14 |
| - | 2 | -8 | 4   | 0.05   | 0.07 |
|   | 2 | -8 | -4  | 0.17   | 0.11 |
|   | 2 | 8  | -3  | 33.39  | 1.47 |
|   | 2 | 8  | -3  | 35.47  | 1.19 |
| - | 2 | -8 | 3   | 34.29  | 1.24 |
|   | 2 | -8 | -3  | 34.19  | 1.20 |
|   | 2 | 8  | -2  | 26.75  | 1.13 |
| - | 2 | -8 | 2   | 25.81  | 0.95 |
|   | 2 | -8 | -2  | 26.11  | 1.10 |
|   | 2 | -8 | -2  | 25.80  | 0.92 |
|   | 2 | 8  | -1  | 43.70  | 1.83 |
|   | 2 | -8 | -1  | 44.08  | 1.50 |
|   | 2 | -8 | -1  | 42.19  | 1.81 |
| - | 2 | -8 | 1   | 43.28  | 1.56 |
|   | 2 | 8  | 0   | 0.25   | 0.10 |
| - | 2 | 8  | 0   | 0.27   | 0.10 |
|   | 2 | -8 | 0   | 0.19   | 0.09 |
| - | 2 | -8 | 0   | 0.26   | 0.07 |
| - | 2 | -8 | 0   | 0.24   | 0.09 |
| - | 2 | 8  | -1  | 126.64 | 4.53 |
|   | 2 | -8 | 1   | 126.96 | 5.33 |
| - | 2 | -8 | -1  | 133.35 | 4.53 |
| - | 2 | -8 | -1  | 122.09 | 4.31 |
| - | 2 | 8  | -2  | 0.49   | 0.11 |
|   | 2 | -8 | 2   | 0.54   | 0.13 |

|   |    |     |       |       |      |
|---|----|-----|-------|-------|------|
| - | 2  | -8  | -2    | 0.59  | 0.08 |
| - | 2  | 8   | -3    | 29.35 | 1.01 |
| - | 2  | 8   | -3    | 28.77 | 1.05 |
| 2 | -8 | 3   | 28.63 | 1.24  |      |
| - | 2  | -8  | -3    | 29.12 | 1.06 |
| - | 2  | -8  | -3    | 27.47 | 0.99 |
| - | 2  | 8   | -4    | 7.62  | 0.34 |
| - | 2  | 8   | -4    | 8.03  | 0.34 |
| - | 2  | -8  | -4    | 7.87  | 0.32 |
| - | 2  | -8  | -4    | 7.83  | 0.38 |
| 2 | -8 | 4   | 7.54  | 0.41  |      |
| - | 2  | 8   | -5    | 0.01  | 0.15 |
| - | 2  | 8   | -5    | 0.47  | 0.11 |
| 2 | 8  | 5   | 0.06  | 0.14  |      |
| 2 | -8 | 5   | 0.03  | 0.18  |      |
| - | 2  | -8  | -5    | 0.30  | 0.12 |
| - | 2  | -8  | -5    | 0.12  | 0.15 |
| 2 | 8  | 6   | -0.29 | 0.16  |      |
| - | 2  | 8   | -6    | 0.32  | 0.16 |
| - | 2  | 8   | -6    | 0.11  | 0.12 |
| - | 2  | -8  | -6    | 0.13  | 0.14 |
| 2 | -8 | 6   | -0.08 | 0.19  |      |
| - | 2  | -8  | -6    | -0.03 | 0.16 |
| - | 2  | 8   | -7    | 43.78 | 1.54 |
| - | 2  | -8  | -7    | 43.63 | 1.52 |
| - | 2  | -8  | -7    | 43.70 | 1.61 |
| 2 | -8 | 7   | 43.37 | 1.89  |      |
| - | 2  | 8   | -8    | -0.06 | 0.19 |
| - | 2  | -8  | -8    | 0.02  | 0.18 |
| - | 2  | -8  | -8    | -0.09 | 0.20 |
| 2 | -8 | 8   | 0.21  | 0.26  |      |
| - | 2  | 8   | -9    | 0.08  | 0.21 |
| - | 2  | -8  | -9    | 0.01  | 0.19 |
| 2 | -8 | 9   | 0.08  | 0.29  |      |
| - | 2  | -8  | -9    | 0.00  | 0.21 |
| - | 2  | 8   | -10   | 0.65  | 0.26 |
| 2 | -8 | 10  | 0.43  | 0.32  |      |
| - | 2  | -8  | -10   | 0.56  | 0.23 |
| - | 2  | -8  | -10   | 0.41  | 0.24 |
| - | 2  | 8   | -11   | 1.47  | 0.30 |
| - | 2  | -8  | -11   | 1.39  | 0.26 |
| 2 | -8 | 11  | 1.72  | 0.37  |      |
| - | 2  | 8   | -12   | 1.63  | 0.34 |
| 2 | -8 | 12  | 2.61  | 0.39  |      |
| - | 2  | 8   | -13   | 0.26  | 0.35 |
| 2 | -8 | 13  | 0.08  | 0.42  |      |
| 2 | -9 | -14 | 1.48  | 0.35  |      |
| - | 2  | -9  | 14    | 1.60  | 0.44 |
| 2 | 9  | -13 | 2.94  | 0.39  |      |
| 2 | -9 | -13 | 2.50  | 0.34  |      |
| - | 2  | -9  | 13    | 2.47  | 0.40 |
| 2 | 9  | -12 | 0.71  | 0.29  |      |
| - | 2  | -9  | 12    | 0.37  | 0.36 |
| 2 | -9 | -12 | 0.87  | 0.29  |      |

|   |    |     |       |       |
|---|----|-----|-------|-------|
| 2 | 9  | -11 | 0.74  | 0.28  |
| - | 2  | -9  | 11    | 0.56  |
| 2 | -9 | -11 | 0.52  | 0.27  |
| 2 | 9  | -10 | 29.96 | 1.13  |
| 2 | -9 | -10 | 29.81 | 1.12  |
| - | 2  | -9  | 10    | 30.36 |
| 2 | -9 | -10 | 29.82 | 1.15  |
| 2 | 9  | -9  | 3.33  | 0.36  |
| 2 | 9  | -9  | 3.45  | 0.41  |
| 2 | -9 | -9  | 3.66  | 0.34  |
| 2 | -9 | -9  | 3.53  | 0.35  |
| 2 | 9  | -8  | 1.14  | 0.21  |
| 2 | 9  | -8  | 0.99  | 0.26  |
| 2 | -9 | -8  | 0.94  | 0.19  |
| 2 | -9 | -8  | 1.06  | 0.18  |
| 2 | 9  | -7  | -0.01 | 0.16  |
| 2 | 9  | -7  | 0.15  | 0.21  |
| 2 | -9 | -7  | -0.10 | 0.18  |
| 2 | -9 | -7  | 0.13  | 0.16  |
| 2 | 9  | -6  | 11.88 | 0.60  |
| 2 | 9  | -6  | 12.51 | 0.50  |
| 2 | -9 | -6  | 12.24 | 0.49  |
| 2 | 9  | -5  | 3.04  | 0.32  |
| 2 | 9  | -5  | 3.01  | 0.23  |
| - | 2  | -9  | 5     | 3.01  |
| 2 | -9 | -5  | 2.94  | 0.23  |
| 2 | 9  | -4  | 7.73  | 0.43  |
| 2 | 9  | -4  | 7.85  | 0.33  |
| - | 2  | -9  | 4     | 7.59  |
| 2 | -9 | -4  | 7.73  | 0.34  |
| 2 | 9  | -3  | 5.93  | 0.26  |
| 2 | 9  | -3  | 5.85  | 0.36  |
| 2 | -9 | -3  | 5.97  | 0.30  |
| - | 2  | -9  | 3     | 6.02  |
| 2 | 9  | -2  | 22.70 | 0.98  |
| 2 | -9 | -2  | 22.72 | 0.80  |
| 2 | -9 | -2  | 21.41 | 0.94  |
| - | 2  | -9  | 2     | 22.47 |
| 2 | 9  | -1  | 47.02 | 2.02  |
| 2 | -9 | -1  | 46.16 | 2.00  |
| - | 2  | -9  | 1     | 49.60 |
| 2 | -9 | -1  | 48.62 | 1.65  |
| 2 | 9  | 0   | 58.34 | 2.46  |
| - | 2  | 9   | 0     | 57.34 |
| 2 | -9 | 0   | 58.27 | 2.46  |
| - | 2  | -9  | 0     | 58.48 |
| - | 2  | -9  | 0     | 60.45 |
| 2 | 9  | 1   | 3.44  | 0.23  |
| - | 2  | 9   | -1    | 3.26  |
| - | 2  | -9  | -1    | 3.35  |
| - | 2  | -9  | -1    | 3.48  |
| 2 | -9 | 1   | 3.30  | 0.24  |
| - | 2  | 9   | -2    | 0.25  |
| 2 | 9  | 2   | 0.21  | 0.08  |

|   |   |     |     |       |      |
|---|---|-----|-----|-------|------|
| - | 2 | -9  | -2  | 0.11  | 0.12 |
|   | 2 | -9  | 2   | 0.08  | 0.14 |
| - | 2 | -9  | -2  | 0.29  | 0.09 |
| - | 2 | 9   | -3  | 29.56 | 1.08 |
| - | 2 | 9   | -3  | 29.14 | 1.03 |
| - | 2 | -9  | -3  | 28.01 | 1.01 |
|   | 2 | -9  | 3   | 29.87 | 1.26 |
| - | 2 | 9   | -4  | 34.54 | 1.25 |
| - | 2 | 9   | -4  | 33.85 | 1.21 |
| - | 2 | -9  | -4  | 33.29 | 1.18 |
|   | 2 | -9  | 4   | 33.94 | 1.48 |
| - | 2 | -9  | -4  | 35.32 | 1.27 |
| - | 2 | 9   | -5  | 0.96  | 0.16 |
|   | 2 | 9   | 5   | 1.05  | 0.15 |
| - | 2 | 9   | -5  | 0.90  | 0.13 |
|   | 2 | -9  | 5   | 0.88  | 0.21 |
| - | 2 | -9  | -5  | 0.90  | 0.13 |
| - | 2 | -9  | -5  | 0.91  | 0.16 |
| - | 2 | 9   | -6  | 3.14  | 0.24 |
| - | 2 | 9   | -6  | 2.82  | 0.26 |
|   | 2 | -9  | 6   | 2.73  | 0.35 |
| - | 2 | -9  | -6  | 2.56  | 0.30 |
| - | 2 | -9  | -6  | 2.65  | 0.25 |
| - | 2 | 9   | -7  | 41.67 | 1.48 |
| - | 2 | -9  | -7  | 41.69 | 1.54 |
|   | 2 | -9  | 7   | 40.94 | 1.81 |
| - | 2 | -9  | -7  | 41.78 | 1.45 |
| - | 2 | 9   | -8  | 0.56  | 0.23 |
| - | 2 | -9  | -8  | 0.65  | 0.19 |
|   | 2 | -9  | 8   | 0.42  | 0.27 |
| - | 2 | -9  | -8  | 0.51  | 0.22 |
| - | 2 | 9   | -9  | 1.14  | 0.26 |
|   | 2 | -9  | 9   | 1.12  | 0.31 |
| - | 2 | -9  | -9  | 0.84  | 0.24 |
| - | 2 | -9  | -9  | 1.11  | 0.22 |
| - | 2 | 9   | -10 | 5.00  | 0.44 |
| - | 2 | -9  | -10 | 5.28  | 0.38 |
| - | 2 | -9  | -10 | 4.88  | 0.44 |
|   | 2 | -9  | 10  | 5.37  | 0.52 |
| - | 2 | 9   | -11 | 0.10  | 0.30 |
|   | 2 | -9  | 11  | 0.33  | 0.34 |
| - | 2 | 9   | -12 | 1.71  | 0.32 |
|   | 2 | -9  | 12  | 1.31  | 0.42 |
|   | 2 | 10  | -13 | 1.77  | 0.35 |
| - | 2 | -10 | 13  | 1.35  | 0.43 |
|   | 2 | -10 | -13 | 1.17  | 0.32 |
|   | 2 | 10  | -12 | 0.20  | 0.32 |
|   | 2 | -10 | -12 | -0.07 | 0.28 |
| - | 2 | -10 | 12  | 0.12  | 0.34 |
|   | 2 | 10  | -11 | 5.43  | 0.43 |
| - | 2 | -10 | 11  | 5.33  | 0.54 |
|   | 2 | -10 | -11 | 5.45  | 0.43 |
|   | 2 | 10  | -10 | 0.16  | 0.24 |
|   | 2 | -10 | -10 | -0.05 | 0.23 |

|   |     |     |       |       |
|---|-----|-----|-------|-------|
| 2 | -10 | -10 | 0.18  | 0.24  |
| - | 2   | -10 | 10    | -0.31 |
| 2 | 10  | -9  | 0.76  | 0.26  |
| 2 | 10  | -9  | 0.66  | 0.22  |
| 2 | -10 | -9  | 0.50  | 0.22  |
| 2 | -10 | -9  | 0.67  | 0.21  |
| 2 | 10  | -8  | 2.64  | 0.28  |
| 2 | 10  | -8  | 2.48  | 0.34  |
| 2 | -10 | -8  | 2.37  | 0.22  |
| 2 | -10 | -8  | 2.16  | 0.22  |
| 2 | 10  | -7  | 16.03 | 0.78  |
| 2 | 10  | -7  | 16.43 | 0.64  |
| 2 | -10 | -7  | 16.34 | 0.67  |
| 2 | -10 | -7  | 16.19 | 0.65  |
| 2 | 10  | -6  | 0.28  | 0.22  |
| 2 | 10  | -6  | 0.35  | 0.16  |
| 2 | -10 | -6  | 0.34  | 0.16  |
| 2 | 10  | -5  | 16.46 | 0.77  |
| 2 | 10  | -5  | 16.88 | 0.62  |
| 2 | -10 | -5  | 15.81 | 0.63  |
| - | 2   | -10 | 5     | 15.61 |
| 2 | 10  | -4  | 0.36  | 0.12  |
| 2 | 10  | -4  | 0.55  | 0.17  |
| - | 2   | -10 | 4     | 0.50  |
| 2 | -10 | -4  | 0.53  | 0.14  |
| 2 | 10  | -3  | 49.20 | 1.72  |
| 2 | 10  | -3  | 49.49 | 2.12  |
| 2 | -10 | -3  | 50.08 | 1.73  |
| - | 2   | -10 | 3     | 50.88 |
| 2 | 10  | -2  | 0.38  | 0.15  |
| 2 | -10 | -2  | 0.34  | 0.09  |
| - | 2   | -10 | 2     | 0.28  |
| 2 | -10 | -2  | 0.41  | 0.13  |
| 2 | 10  | -1  | 12.25 | 0.56  |
| 2 | -10 | -1  | 12.38 | 0.48  |
| 2 | -10 | -1  | 11.30 | 0.53  |
| - | 2   | -10 | 1     | 12.02 |
| 2 | 10  | 0   | 6.34  | 0.34  |
| 2 | -10 | 0   | 6.07  | 0.33  |
| - | 2   | -10 | 0     | 6.51  |
| - | 2   | -10 | 0     | 6.58  |
| 2 | -10 | 0   | 6.36  | 0.33  |
| - | 2   | 10  | -1    | 18.07 |
| 2 | 10  | 1   | 18.76 | 0.82  |
| - | 2   | -10 | -1    | 19.34 |
| - | 2   | -10 | -1    | 18.50 |
| 2 | -10 | 1   | 18.97 | 0.83  |
| 2 | 10  | 2   | 4.35  | 0.26  |
| - | 2   | 10  | -2    | 4.01  |
| - | 2   | -10 | -2    | 3.28  |
| - | 2   | -10 | -2    | 3.96  |
| 2 | -10 | 2   | 3.66  | 0.28  |
| 2 | 10  | 3   | 23.99 | 1.19  |
| - | 2   | 10  | -3    | 29.48 |

|   |   |     |     |       |      |
|---|---|-----|-----|-------|------|
| - | 2 | -10 | -3  | 28.87 | 0.98 |
|   | 2 | -10 | 3   | 29.81 | 1.22 |
| - | 2 | 10  | -4  | 40.11 | 1.48 |
| - | 2 | 10  | -4  | 40.92 | 1.43 |
| - | 2 | -10 | -4  | 41.20 | 1.50 |
| - | 2 | -10 | -4  | 41.12 | 1.41 |
|   | 2 | -10 | 4   | 40.17 | 1.74 |
| - | 2 | 10  | -5  | 2.20  | 0.21 |
| - | 2 | 10  | -5  | 2.57  | 0.23 |
| - | 2 | -10 | -5  | 2.11  | 0.21 |
|   | 2 | -10 | 5   | 1.83  | 0.24 |
| - | 2 | -10 | -5  | 1.95  | 0.22 |
| - | 2 | 10  | -6  | 0.37  | 0.20 |
|   | 2 | -10 | 6   | 0.15  | 0.21 |
| - | 2 | -10 | -6  | 0.17  | 0.14 |
| - | 2 | -10 | -6  | 0.07  | 0.19 |
| - | 2 | 10  | -7  | 22.03 | 0.87 |
|   | 2 | -10 | 7   | 22.32 | 1.06 |
| - | 2 | -10 | -7  | 22.59 | 0.90 |
| - | 2 | -10 | -7  | 23.54 | 0.84 |
| - | 2 | 10  | -8  | 0.40  | 0.24 |
| - | 2 | -10 | -8  | 0.38  | 0.18 |
| - | 2 | -10 | -8  | 0.34  | 0.20 |
|   | 2 | -10 | 8   | 0.22  | 0.28 |
| - | 2 | 10  | -9  | 0.35  | 0.24 |
| - | 2 | -10 | -9  | -0.08 | 0.23 |
| - | 2 | -10 | -9  | 0.12  | 0.21 |
|   | 2 | -10 | 9   | -0.01 | 0.31 |
| - | 2 | 10  | -10 | 0.20  | 0.26 |
|   | 2 | -10 | 10  | 0.28  | 0.34 |
| - | 2 | -10 | -10 | -0.10 | 0.26 |
| - | 2 | 10  | -11 | 14.17 | 0.68 |
|   | 2 | -10 | 11  | 12.74 | 0.76 |
| - | 2 | 10  | -12 | 0.34  | 0.34 |
|   | 2 | -10 | 12  | 0.49  | 0.42 |
|   | 2 | 11  | -13 | 0.09  | 0.36 |
| - | 2 | -11 | 13  | 0.19  | 0.42 |
|   | 2 | -11 | -13 | -0.26 | 0.31 |
|   | 2 | 11  | -12 | 1.52  | 0.34 |
| - | 2 | -11 | 12  | 0.97  | 0.37 |
|   | 2 | -11 | -12 | 0.88  | 0.30 |
|   | 2 | 11  | -11 | 0.75  | 0.30 |
|   | 2 | -11 | -11 | 0.37  | 0.25 |
| - | 2 | -11 | 11  | 0.57  | 0.36 |
|   | 2 | 11  | -10 | 10.16 | 0.54 |
| - | 2 | -11 | 10  | 9.43  | 0.62 |
|   | 2 | -11 | -10 | 10.24 | 0.53 |
|   | 2 | -11 | -10 | 9.44  | 0.53 |
|   | 2 | 11  | -9  | 0.08  | 0.24 |
|   | 2 | 11  | -9  | 0.49  | 0.29 |
|   | 2 | -11 | -9  | 0.07  | 0.22 |
|   | 2 | -11 | -9  | 0.02  | 0.24 |
|   | 2 | 11  | -8  | 9.53  | 0.57 |
|   | 2 | 11  | -8  | 10.33 | 0.49 |

|   |     |     |       |       |      |
|---|-----|-----|-------|-------|------|
| 2 | -11 | -8  | 10.21 | 0.51  |      |
| 2 | -11 | -8  | 10.33 | 0.50  |      |
| 2 | 11  | -7  | 7.62  | 0.49  |      |
| 2 | 11  | -7  | 8.80  | 0.42  |      |
| 2 | -11 | -7  | 8.42  | 0.44  |      |
| 2 | -11 | -7  | 8.00  | 0.44  |      |
| 2 | 11  | -6  | 79.52 | 3.44  |      |
| 2 | 11  | -6  | 83.95 | 2.80  |      |
| 2 | -11 | -6  | 80.47 | 2.79  |      |
| 2 | 11  | -5  | 18.23 | 0.85  |      |
| 2 | 11  | -5  | 17.87 | 0.67  |      |
| - | 2   | -11 | 5     | 17.69 | 0.68 |
| 2 | -11 | -5  | 18.18 | 0.69  |      |
| 2 | 11  | -4  | 1.28  | 0.15  |      |
| 2 | 11  | -4  | 1.43  | 0.21  |      |
| - | 2   | -11 | 4     | 1.08  | 0.13 |
| 2 | -11 | -4  | 1.63  | 0.17  |      |
| 2 | 11  | -3  | 0.78  | 0.19  |      |
| 2 | 11  | -3  | 0.79  | 0.13  |      |
| - | 2   | -11 | 3     | 0.69  | 0.13 |
| 2 | -11 | -3  | 0.90  | 0.16  |      |
| 2 | 11  | -2  | 1.09  | 0.18  |      |
| - | 2   | -11 | 2     | 0.85  | 0.13 |
| 2 | -11 | -2  | 0.97  | 0.11  |      |
| 2 | -11 | -2  | 1.01  | 0.14  |      |
| 2 | 11  | -1  | 17.96 | 0.80  |      |
| 2 | -11 | -1  | 18.03 | 0.66  |      |
| 2 | -11 | -1  | 17.01 | 0.77  |      |
| - | 2   | -11 | 1     | 17.82 | 0.68 |
| 2 | 11  | 0   | 22.55 | 1.00  |      |
| - | 2   | -11 | 0     | 23.14 | 0.86 |
| - | 2   | -11 | 0     | 22.54 | 0.80 |
| 2 | -11 | 0   | 23.06 | 0.84  |      |
| 2 | -11 | 0   | 22.70 | 0.99  |      |
| 2 | 11  | 1   | 4.35  | 0.29  |      |
| - | 2   | -11 | -1    | 4.36  | 0.26 |
| - | 2   | -11 | -1    | 4.29  | 0.22 |
| 2 | -11 | 1   | 4.49  | 0.29  |      |
| 2 | 11  | 2   | 37.28 | 1.59  |      |
| 2 | -11 | 2   | 38.74 | 1.60  |      |
| - | 2   | -11 | -2    | 37.37 | 1.29 |
| - | 2   | -11 | -2    | 36.02 | 1.38 |
| 2 | 11  | 3   | 15.44 | 0.70  |      |
| - | 2   | 11  | -3    | 15.56 | 0.62 |
| 2 | -11 | 3   | 16.31 | 0.73  |      |
| - | 2   | -11 | -3    | 15.59 | 0.57 |
| - | 2   | 11  | -4    | 67.50 | 2.34 |
| - | 2   | 11  | -4    | 67.17 | 2.44 |
| - | 2   | -11 | -4    | 69.08 | 2.46 |
| 2 | -11 | 4   | 68.61 | 2.87  |      |
| - | 2   | -11 | -4    | 66.92 | 2.32 |
| - | 2   | 11  | -5    | 7.87  | 0.41 |
| - | 2   | 11  | -5    | 7.99  | 0.38 |
| - | 2   | -11 | -5    | 8.00  | 0.37 |

|   |   |     |     |       |      |
|---|---|-----|-----|-------|------|
| - | 2 | -11 | -5  | 7.72  | 0.40 |
|   | 2 | -11 | 5   | 7.61  | 0.48 |
| - | 2 | 11  | -6  | 3.93  | 0.34 |
|   | 2 | -11 | 6   | 4.08  | 0.40 |
| - | 2 | -11 | -6  | 4.46  | 0.29 |
| - | 2 | -11 | -6  | 3.76  | 0.32 |
| - | 2 | 11  | -7  | 1.26  | 0.24 |
| - | 2 | -11 | -7  | 1.12  | 0.19 |
|   | 2 | -11 | 7   | 0.89  | 0.26 |
| - | 2 | -11 | -7  | 1.06  | 0.23 |
| - | 2 | 11  | -8  | 0.13  | 0.22 |
|   | 2 | -11 | 8   | 0.06  | 0.27 |
| - | 2 | -11 | -8  | 0.20  | 0.24 |
| - | 2 | 11  | -9  | 3.60  | 0.41 |
|   | 2 | -11 | 9   | 3.57  | 0.43 |
| - | 2 | -11 | -9  | 3.99  | 0.42 |
| - | 2 | 11  | -10 | 6.02  | 0.44 |
|   | 2 | -11 | 10  | 5.97  | 0.51 |
| - | 2 | -11 | -10 | 5.58  | 0.47 |
| - | 2 | 11  | -11 | 0.15  | 0.32 |
| - | 2 | -11 | -11 | -0.25 | 0.29 |
|   | 2 | -11 | 11  | 0.57  | 0.41 |
| - | 2 | 11  | -12 | 3.96  | 0.42 |
|   | 2 | -11 | 12  | 4.05  | 0.54 |
|   | 2 | 12  | -13 | 1.35  | 0.39 |
|   | 2 | -12 | -13 | 0.96  | 0.33 |
|   | 2 | 12  | -12 | 0.76  | 0.35 |
|   | 2 | -12 | -12 | 0.27  | 0.30 |
| - | 2 | -12 | 12  | 1.09  | 0.42 |
|   | 2 | 12  | -11 | 0.60  | 0.32 |
|   | 2 | -12 | -11 | 0.20  | 0.28 |
| - | 2 | -12 | 11  | 0.15  | 0.34 |
|   | 2 | 12  | -10 | 1.25  | 0.30 |
|   | 2 | -12 | -10 | 0.95  | 0.27 |
| - | 2 | -12 | 10  | 0.63  | 0.36 |
|   | 2 | -12 | -10 | 0.98  | 0.27 |
|   | 2 | 12  | -9  | 0.27  | 0.26 |
|   | 2 | -12 | -9  | 0.14  | 0.23 |
|   | 2 | -12 | -9  | 0.10  | 0.24 |
|   | 2 | 12  | -8  | 2.27  | 0.26 |
|   | 2 | 12  | -8  | 2.61  | 0.36 |
|   | 2 | -12 | -8  | 2.48  | 0.26 |
|   | 2 | -12 | -8  | 2.52  | 0.26 |
|   | 2 | 12  | -7  | 10.59 | 0.49 |
|   | 2 | 12  | -7  | 10.33 | 0.62 |
|   | 2 | -12 | -7  | 10.07 | 0.49 |
|   | 2 | -12 | -7  | 11.36 | 0.51 |
|   | 2 | 12  | -6  | 10.09 | 0.45 |
|   | 2 | 12  | -6  | 10.04 | 0.58 |
|   | 2 | -12 | -6  | 9.75  | 0.47 |
|   | 2 | 12  | -5  | 38.54 | 1.66 |
|   | 2 | 12  | -5  | 38.29 | 1.34 |
| - | 2 | -12 | 5   | 37.74 | 1.38 |
|   | 2 | -12 | -5  | 37.83 | 1.35 |

|   |     |     |       |       |      |
|---|-----|-----|-------|-------|------|
| 2 | 12  | -4  | 2.60  | 0.33  |      |
| 2 | 12  | -4  | 2.76  | 0.24  |      |
| 2 | -12 | -4  | 3.13  | 0.28  |      |
| - | 2   | -12 | 4     | 2.21  | 0.22 |
| 2 | 12  | -3  | 0.53  | 0.19  |      |
| - | 2   | -12 | 3     | 0.37  | 0.13 |
| 2 | -12 | -3  | 0.55  | 0.16  |      |
| 2 | 12  | -2  | -0.01 | 0.17  |      |
| 2 | -12 | -2  | 0.13  | 0.15  |      |
| - | 2   | -12 | 2     | 0.08  | 0.13 |
| 2 | 12  | -1  | 1.43  | 0.19  |      |
| 2 | -12 | -1  | 1.41  | 0.19  |      |
| 2 | -12 | -1  | 1.46  | 0.17  |      |
| - | 2   | -12 | 1     | 1.33  | 0.14 |
| - | 2   | -12 | 1     | 1.31  | 0.16 |
| 2 | 12  | 0   | 9.74  | 0.49  |      |
| 2 | -12 | 0   | 9.26  | 0.46  |      |
| - | 2   | -12 | 0     | 9.77  | 0.43 |
| 2 | -12 | 0   | 9.10  | 0.41  |      |
| - | 2   | -12 | 0     | 9.29  | 0.38 |
| 2 | 12  | 1   | 27.39 | 1.18  |      |
| 2 | -12 | 1   | 27.24 | 1.18  |      |
| - | 2   | -12 | -1    | 26.67 | 0.96 |
| - | 2   | -12 | -1    | 27.80 | 1.02 |
| 2 | 12  | 2   | 7.20  | 0.40  |      |
| - | 2   | -12 | -2    | 7.47  | 0.32 |
| 2 | -12 | 2   | 7.18  | 0.41  |      |
| - | 2   | -12 | -2    | 7.44  | 0.37 |
| - | 2   | -12 | -3    | 24.85 | 0.90 |
| - | 2   | -12 | -3    | 26.00 | 0.99 |
| 2 | -12 | 3   | 25.99 | 1.14  |      |
| 2 | -12 | 4   | 2.48  | 0.33  |      |
| - | 2   | -12 | -4    | 2.38  | 0.25 |
| - | 2   | -12 | -4    | 2.07  | 0.23 |
| - | 2   | 12  | -5    | 0.28  | 0.21 |
| - | 2   | -12 | -5    | 0.32  | 0.19 |
| - | 2   | -12 | -5    | 0.45  | 0.14 |
| 2 | -12 | 5   | 0.42  | 0.24  |      |
| - | 2   | 12  | -6    | 4.71  | 0.33 |
| - | 2   | -12 | -6    | 4.86  | 0.39 |
| 2 | -12 | 6   | 4.64  | 0.43  |      |
| - | 2   | 12  | -7    | 7.34  | 0.43 |
| - | 2   | -12 | -7    | 6.94  | 0.45 |
| 2 | -12 | 7   | 6.79  | 0.48  |      |
| - | 2   | 12  | -8    | 0.29  | 0.26 |
| - | 2   | -12 | -8    | 0.29  | 0.23 |
| 2 | -12 | 8   | 0.53  | 0.32  |      |
| - | 2   | 12  | -9    | 1.64  | 0.28 |
| 2 | -12 | 9   | 1.65  | 0.37  |      |
| - | 2   | -12 | -9    | 1.44  | 0.29 |
| - | 2   | 12  | -10   | 0.24  | 0.30 |
| 2 | -12 | 10  | 0.34  | 0.37  |      |
| - | 2   | -12 | -10   | 0.00  | 0.29 |
| - | 2   | 12  | -11   | 3.27  | 0.38 |

|   |   |     |     |       |      |
|---|---|-----|-----|-------|------|
| - | 2 | -12 | -11 | 3.42  | 0.38 |
|   | 2 | -12 | 11  | 3.73  | 0.52 |
|   | 2 | -13 | -13 | 0.13  | 0.32 |
|   | 2 | 13  | -12 | 0.56  | 0.36 |
| - | 2 | -13 | 12  | 0.15  | 0.43 |
|   | 2 | -13 | -12 | 0.26  | 0.31 |
|   | 2 | 13  | -11 | 7.55  | 0.54 |
|   | 2 | -13 | -11 | 7.69  | 0.52 |
| - | 2 | -13 | 11  | 7.17  | 0.65 |
|   | 2 | -13 | -11 | 7.12  | 0.50 |
|   | 2 | 13  | -10 | 5.03  | 0.41 |
|   | 2 | -13 | -10 | 4.51  | 0.42 |
| - | 2 | -13 | 10  | 4.19  | 0.56 |
|   | 2 | -13 | -10 | 4.36  | 0.44 |
|   | 2 | 13  | -9  | 3.65  | 0.40 |
|   | 2 | -13 | -9  | 3.41  | 0.41 |
|   | 2 | -13 | -9  | 3.46  | 0.39 |
|   | 2 | 13  | -8  | 0.85  | 0.25 |
|   | 2 | 13  | -8  | 0.42  | 0.31 |
|   | 2 | -13 | -8  | 0.70  | 0.24 |
|   | 2 | -13 | -8  | 0.19  | 0.21 |
|   | 2 | 13  | -7  | 0.28  | 0.26 |
|   | 2 | 13  | -7  | 0.21  | 0.21 |
|   | 2 | -13 | -7  | 0.09  | 0.21 |
|   | 2 | -13 | -7  | 0.13  | 0.21 |
|   | 2 | 13  | -6  | 13.36 | 0.72 |
|   | 2 | 13  | -6  | 13.92 | 0.56 |
|   | 2 | -13 | -6  | 13.35 | 0.58 |
|   | 2 | 13  | -5  | 14.36 | 0.73 |
|   | 2 | 13  | -5  | 14.48 | 0.59 |
|   | 2 | -13 | -5  | 14.14 | 0.59 |
|   | 2 | 13  | -4  | 2.46  | 0.34 |
|   | 2 | -13 | -4  | 2.90  | 0.29 |
| - | 2 | -13 | 4   | 2.22  | 0.25 |
|   | 2 | 13  | -3  | 5.38  | 0.39 |
| - | 2 | -13 | 3   | 5.18  | 0.32 |
|   | 2 | -13 | -3  | 5.27  | 0.33 |
|   | 2 | 13  | -2  | 10.00 | 0.53 |
|   | 2 | -13 | -2  | 10.30 | 0.45 |
| - | 2 | -13 | 2   | 9.98  | 0.45 |
|   | 2 | 13  | -1  | 4.71  | 0.33 |
| - | 2 | -13 | 1   | 4.19  | 0.27 |
| - | 2 | -13 | 1   | 4.07  | 0.27 |
|   | 2 | -13 | -1  | 4.59  | 0.31 |
|   | 2 | 13  | 0   | 17.94 | 0.82 |
| - | 2 | -13 | 0   | 17.94 | 0.66 |
| - | 2 | -13 | 0   | 18.17 | 0.72 |
|   | 2 | -13 | 0   | 18.25 | 0.81 |
|   | 2 | -13 | 0   | 18.26 | 0.70 |
|   | 2 | 13  | 1   | 0.09  | 0.16 |
| - | 2 | -13 | -1  | -0.21 | 0.17 |
|   | 2 | -13 | 1   | 0.07  | 0.17 |
| - | 2 | -13 | -1  | 0.09  | 0.12 |
| - | 2 | -13 | -2  | 0.51  | 0.19 |

|   |     |     |       |       |
|---|-----|-----|-------|-------|
| 2 | -13 | 2   | 0.59  | 0.19  |
| - | 2   | -13 | -2    | 0.47  |
| - | 2   | -13 | -3    | 12.31 |
| 2 | -13 | 3   | 12.19 | 0.62  |
| - | 2   | -13 | -4    | 5.74  |
| 2 | -13 | 4   | 5.52  | 0.42  |
| - | 2   | -13 | -5    | 4.33  |
| 2 | -13 | 5   | 4.89  | 0.42  |
| - | 2   | 13  | -6    | 1.05  |
| - | 2   | -13 | -6    | 0.58  |
| 2 | -13 | 6   | 0.63  | 0.28  |
| - | 2   | 13  | -7    | 0.14  |
| 2 | -13 | 7   | -0.01 | 0.30  |
| - | 2   | -13 | -7    | -0.02 |
| - | 2   | 13  | -8    | 5.31  |
| - | 2   | -13 | -8    | 5.49  |
| 2 | -13 | 8   | 6.00  | 0.49  |
| - | 2   | 13  | -9    | 0.45  |
| - | 2   | -13 | -9    | -0.29 |
| 2 | -13 | 9   | -0.04 | 0.36  |
| - | 2   | 13  | -10   | 0.32  |
| 2 | -13 | 10  | 0.71  | 0.40  |
| - | 2   | -13 | -10   | 0.00  |
| - | 2   | 13  | -11   | 1.16  |
| - | 2   | -13 | -11   | 0.90  |
| 2 | -13 | 11  | 1.21  | 0.42  |
| 2 | 14  | -12 | 0.40  | 0.37  |
| 2 | -14 | -12 | 0.33  | 0.32  |
| 2 | 14  | -11 | 0.23  | 0.33  |
| - | 2   | -14 | 11    | 0.13  |
| 2 | -14 | -11 | 0.05  | 0.29  |
| 2 | -14 | -11 | 0.14  | 0.31  |
| 2 | 14  | -10 | 0.31  | 0.30  |
| 2 | -14 | -10 | -0.02 | 0.27  |
| - | 2   | -14 | 10    | -0.29 |
| 2 | -14 | -10 | 0.29  | 0.28  |
| 2 | 14  | -9  | 0.56  | 0.27  |
| 2 | -14 | -9  | 0.23  | 0.27  |
| 2 | -14 | -9  | 0.42  | 0.26  |
| 2 | 14  | -8  | 4.26  | 0.39  |
| 2 | 14  | -8  | 4.31  | 0.44  |
| 2 | -14 | -8  | 4.58  | 0.40  |
| 2 | -14 | -8  | 4.19  | 0.40  |
| 2 | 14  | -7  | 6.46  | 0.49  |
| 2 | 14  | -7  | 6.92  | 0.41  |
| 2 | -14 | -7  | 7.43  | 0.43  |
| 2 | -14 | -7  | 6.91  | 0.45  |
| 2 | 14  | -6  | 0.25  | 0.20  |
| 2 | 14  | -6  | 0.28  | 0.25  |
| 2 | -14 | -6  | 0.36  | 0.21  |
| 2 | 14  | -5  | 6.97  | 0.36  |
| 2 | 14  | -5  | 6.09  | 0.44  |
| 2 | -14 | -5  | 6.50  | 0.39  |
| 2 | 14  | -4  | 8.64  | 0.53  |

|   |     |     |       |       |      |
|---|-----|-----|-------|-------|------|
| 2 | -14 | -4  | 8.63  | 0.43  |      |
| - | 2   | -14 | 4     | 8.93  | 0.42 |
| 2 | 14  | -3  | 6.36  | 0.43  |      |
| - | 2   | -14 | 3     | 6.71  | 0.35 |
| 2 | -14 | -3  | 6.52  | 0.38  |      |
| 2 | 14  | -2  | 15.86 | 0.77  |      |
| 2 | -14 | -2  | 16.63 | 0.65  |      |
| - | 2   | -14 | 2     | 16.32 | 0.66 |
| 2 | 14  | -1  | 6.77  | 0.43  |      |
| - | 2   | -14 | 1     | 6.60  | 0.34 |
| - | 2   | -14 | 1     | 6.74  | 0.37 |
| 2 | -14 | -1  | 7.03  | 0.38  |      |
| 2 | 14  | 0   | 0.12  | 0.18  |      |
| - | 2   | -14 | 0     | 0.14  | 0.18 |
| - | 2   | -14 | 0     | 0.29  | 0.13 |
| 2 | -14 | 0   | 0.70  | 0.20  |      |
| 2 | -14 | 0   | 0.17  | 0.16  |      |
| 2 | 14  | 1   | 5.06  | 0.37  |      |
| - | 2   | -14 | -1    | 5.63  | 0.35 |
| 2 | -14 | 1   | 4.57  | 0.37  |      |
| 2 | -14 | 1   | 5.32  | 0.36  |      |
| - | 2   | -14 | -2    | 4.15  | 0.35 |
| 2 | -14 | 2   | 4.43  | 0.37  |      |
| - | 2   | -14 | -3    | 1.31  | 0.22 |
| 2 | -14 | 3   | 1.59  | 0.26  |      |
| 2 | -14 | 4   | 3.16  | 0.38  |      |
| - | 2   | -14 | -4    | 3.17  | 0.31 |
| 2 | -14 | 5   | 3.36  | 0.40  |      |
| - | 2   | -14 | -5    | 3.35  | 0.32 |
| 2 | -14 | 6   | 3.13  | 0.43  |      |
| - | 2   | -14 | -6    | 2.40  | 0.28 |
| - | 2   | 14  | -7    | 9.99  | 0.53 |
| 2 | -14 | 7   | 9.59  | 0.59  |      |
| - | 2   | -14 | -7    | 9.26  | 0.50 |
| - | 2   | 14  | -8    | 0.45  | 0.29 |
| - | 2   | -14 | -8    | -0.09 | 0.27 |
| 2 | -14 | 8   | 0.27  | 0.36  |      |
| - | 2   | 14  | -9    | 1.17  | 0.32 |
| 2 | -14 | 9   | 0.99  | 0.39  |      |
| - | 2   | -14 | -9    | 0.74  | 0.30 |
| - | 2   | 14  | -10   | 0.73  | 0.34 |
| - | 2   | -14 | -10   | 0.29  | 0.32 |
| 2 | -14 | 10  | 0.82  | 0.39  |      |
| - | 2   | -14 | -11   | 0.01  | 0.33 |
| 2 | 15  | -11 | 0.37  | 0.34  |      |
| - | 2   | -15 | 11    | -0.01 | 0.44 |
| 2 | -15 | -11 | 0.41  | 0.31  |      |
| 2 | -15 | -11 | 0.02  | 0.33  |      |
| 2 | 15  | -10 | 1.88  | 0.35  |      |
| 2 | -15 | -10 | 1.72  | 0.31  |      |
| 2 | -15 | -10 | 1.81  | 0.31  |      |
| - | 2   | -15 | 10    | 1.07  | 0.39 |
| 2 | 15  | -9  | 3.06  | 0.33  |      |
| - | 2   | -15 | 9     | 2.17  | 0.42 |

|   |     |     |       |       |
|---|-----|-----|-------|-------|
| 2 | -15 | -9  | 2.42  | 0.31  |
| 2 | -15 | -9  | 2.84  | 0.30  |
| 2 | 15  | -8  | 3.43  | 0.48  |
| 2 | 15  | -8  | 2.84  | 0.30  |
| 2 | -15 | -8  | 3.03  | 0.35  |
| 2 | -15 | -8  | 2.93  | 0.29  |
| 2 | 15  | -7  | 1.58  | 0.25  |
| 2 | 15  | -7  | 1.66  | 0.33  |
| 2 | -15 | -7  | 0.85  | 0.23  |
| 2 | -15 | -7  | 1.45  | 0.25  |
| 2 | 15  | -6  | 1.75  | 0.24  |
| 2 | 15  | -6  | 1.64  | 0.32  |
| 2 | -15 | -6  | 1.65  | 0.24  |
| 2 | 15  | -5  | 5.39  | 0.47  |
| 2 | -15 | -5  | 5.65  | 0.38  |
| 2 | 15  | -4  | 0.47  | 0.25  |
| - | 2   | -15 | 4     | 0.56  |
| 2 | -15 | -4  | 0.51  | 0.21  |
| 2 | 15  | -3  | 0.47  | 0.23  |
| 2 | -15 | -3  | 0.77  | 0.20  |
| - | 2   | -15 | 3     | 0.48  |
| 2 | 15  | -2  | 8.43  | 0.51  |
| - | 2   | -15 | 2     | 8.53  |
| 2 | -15 | -2  | 9.17  | 0.43  |
| - | 2   | -15 | 2     | 7.46  |
| 2 | 15  | -1  | 9.68  | 0.54  |
| - | 2   | -15 | 1     | 10.02 |
| 2 | -15 | -1  | 9.80  | 0.47  |
| 2 | 15  | 0   | 0.10  | 0.19  |
| 2 | -15 | 0   | 0.17  | 0.18  |
| - | 2   | -15 | 0     | 0.01  |
| 2 | -15 | 1   | 1.34  | 0.23  |
| 2 | -15 | 1   | 1.68  | 0.23  |
| - | 2   | -15 | -1    | 1.35  |
| - | 2   | -15 | -2    | 1.01  |
| 2 | -15 | 2   | 0.93  | 0.24  |
| - | 2   | -15 | -3    | 3.08  |
| 2 | -15 | 3   | 3.02  | 0.36  |
| - | 2   | -15 | -4    | 12.11 |
| 2 | -15 | 4   | 12.47 | 0.66  |
| 2 | -15 | 5   | 2.91  | 0.42  |
| - | 2   | -15 | -5    | 2.94  |
| 2 | -15 | 6   | 1.50  | 0.33  |
| - | 2   | -15 | -6    | 1.18  |
| - | 2   | -15 | -7    | 4.83  |
| 2 | -15 | 7   | 5.25  | 0.52  |
| - | 2   | 15  | -8    | 0.32  |
| 2 | -15 | 8   | 0.35  | 0.37  |
| - | 2   | -15 | -8    | 0.13  |
| - | 2   | 15  | -9    | 1.09  |
| - | 2   | -15 | -9    | 0.86  |
| 2 | -15 | 9   | 1.26  | 0.42  |
| - | 2   | 15  | -10   | 0.27  |
| 2 | -15 | 10  | 0.17  | 0.44  |

|   |   |     |     |       |      |
|---|---|-----|-----|-------|------|
| - | 2 | -15 | -10 | 0.03  | 0.33 |
| - | 2 | -15 | -11 | 0.07  | 0.35 |
|   | 2 | 16  | -11 | 0.39  | 0.35 |
|   | 2 | -16 | -11 | 0.05  | 0.32 |
|   | 2 | 16  | -10 | -0.02 | 0.32 |
| - | 2 | -16 | 10  | -0.09 | 0.42 |
|   | 2 | -16 | -10 | 0.05  | 0.31 |
|   | 2 | 16  | -9  | 1.44  | 0.31 |
|   | 2 | -16 | -9  | 0.99  | 0.30 |
|   | 2 | -16 | -9  | 1.38  | 0.30 |
| - | 2 | -16 | 9   | 1.02  | 0.38 |
|   | 2 | 16  | -8  | 5.15  | 0.43 |
|   | 2 | -16 | -8  | 5.21  | 0.43 |
|   | 2 | -16 | -8  | 4.33  | 0.45 |
|   | 2 | 16  | -7  | 0.95  | 0.25 |
|   | 2 | 16  | -7  | 0.60  | 0.33 |
|   | 2 | -16 | -7  | 0.60  | 0.26 |
|   | 2 | -16 | -7  | 0.68  | 0.26 |
|   | 2 | 16  | -6  | 5.96  | 0.51 |
|   | 2 | -16 | -6  | 5.80  | 0.40 |
|   | 2 | -16 | -6  | 6.78  | 0.45 |
|   | 2 | 16  | -5  | 0.48  | 0.28 |
|   | 2 | -16 | -5  | 0.24  | 0.22 |
|   | 2 | 16  | -4  | 0.67  | 0.27 |
|   | 2 | -16 | -4  | 0.77  | 0.22 |
|   | 2 | 16  | -3  | 0.68  | 0.25 |
|   | 2 | -16 | -3  | 0.58  | 0.21 |
| - | 2 | -16 | 3   | 0.72  | 0.21 |
|   | 2 | 16  | -2  | -0.08 | 0.22 |
|   | 2 | -16 | -2  | 0.22  | 0.21 |
| - | 2 | -16 | 2   | 0.04  | 0.20 |
|   | 2 | 16  | -1  | 0.29  | 0.21 |
|   | 2 | -16 | -1  | 0.73  | 0.22 |
| - | 2 | -16 | 1   | 0.13  | 0.21 |
|   | 2 | -16 | 0   | 1.32  | 0.23 |
| - | 2 | -16 | 0   | 1.00  | 0.20 |
| - | 2 | -16 | -1  | 7.15  | 0.43 |
|   | 2 | -16 | 1   | 6.14  | 0.41 |
|   | 2 | -16 | 2   | 9.54  | 0.55 |
| - | 2 | -16 | -2  | 8.98  | 0.50 |
| - | 2 | -16 | -3  | 2.85  | 0.32 |
|   | 2 | -16 | 3   | 3.38  | 0.38 |
| - | 2 | -16 | -4  | 0.29  | 0.22 |
|   | 2 | -16 | 4   | 0.47  | 0.28 |
|   | 2 | -16 | 5   | 0.61  | 0.30 |
| - | 2 | -16 | -5  | 0.07  | 0.25 |
| - | 2 | -16 | -6  | 0.47  | 0.27 |
|   | 2 | -16 | 6   | 0.78  | 0.33 |
|   | 2 | -16 | 7   | 0.88  | 0.34 |
| - | 2 | -16 | -7  | 0.73  | 0.29 |
|   | 2 | -16 | 8   | 4.98  | 0.57 |
| - | 2 | -16 | -8  | 4.50  | 0.47 |
| - | 2 | 16  | -9  | 0.55  | 0.34 |
| - | 2 | -16 | -9  | 0.02  | 0.29 |

|   |     |     |       |       |      |
|---|-----|-----|-------|-------|------|
| 2 | -16 | 9   | 0.08  | 0.42  |      |
| - | 2   | -16 | -10   | -0.06 | 0.34 |
| 2 | -17 | -10 | 0.87  | 0.33  |      |
| - | 2   | -17 | 10    | 0.33  | 0.44 |
| 2 | -17 | -9  | 0.12  | 0.31  |      |
| - | 2   | -17 | 9     | -0.15 | 0.38 |
| 2 | -17 | -8  | 1.36  | 0.28  |      |
| 2 | -17 | -8  | 0.90  | 0.30  |      |
| 2 | 17  | -7  | 1.57  | 0.33  |      |
| 2 | -17 | -7  | 0.89  | 0.28  |      |
| 2 | -17 | -7  | 1.41  | 0.28  |      |
| 2 | 17  | -6  | 0.74  | 0.29  |      |
| 2 | -17 | -6  | 1.04  | 0.25  |      |
| 2 | -17 | -6  | 0.66  | 0.27  |      |
| 2 | 17  | -5  | 3.93  | 0.46  |      |
| 2 | -17 | -5  | 4.66  | 0.39  |      |
| 2 | 17  | -4  | 0.48  | 0.28  |      |
| 2 | -17 | -4  | 0.34  | 0.23  |      |
| 2 | 17  | -3  | 0.37  | 0.26  |      |
| - | 2   | -17 | 3     | 0.19  | 0.21 |
| 2 | -17 | -3  | 0.49  | 0.22  |      |
| 2 | 17  | -2  | 5.19  | 0.45  |      |
| 2 | -17 | -2  | 5.14  | 0.38  |      |
| - | 2   | -17 | 2     | 5.18  | 0.38 |
| 2 | -17 | -1  | 4.07  | 0.37  |      |
| - | 2   | -17 | 1     | 4.55  | 0.37 |
| 2 | -17 | 0   | 2.50  | 0.26  |      |
| - | 2   | -17 | 0     | 2.39  | 0.26 |
| 2 | -17 | 1   | 5.78  | 0.41  |      |
| - | 2   | -17 | -1    | 5.48  | 0.38 |
| - | 2   | -17 | -2    | -0.01 | 0.22 |
| 2 | -17 | 2   | -0.18 | 0.25  |      |
| - | 2   | -17 | -3    | 1.88  | 0.27 |
| 2 | -17 | 3   | 2.12  | 0.30  |      |
| - | 2   | -17 | -4    | 1.08  | 0.25 |
| 2 | -17 | 4   | 1.03  | 0.30  |      |
| 2 | -17 | 5   | 1.34  | 0.34  |      |
| - | 2   | -17 | -5    | 1.09  | 0.28 |
| 2 | -17 | 6   | 0.44  | 0.35  |      |
| - | 2   | -17 | -6    | 0.37  | 0.26 |
| - | 2   | -17 | -7    | 0.06  | 0.26 |
| 2 | -17 | 7   | 0.57  | 0.39  |      |
| 2 | -17 | 8   | 0.83  | 0.43  |      |
| - | 2   | -17 | -8    | 0.40  | 0.31 |
| 2 | -17 | 9   | 2.29  | 0.48  |      |
| - | 2   | -17 | -9    | 1.97  | 0.36 |
| - | 2   | -18 | 9     | -0.05 | 0.43 |
| 2 | -18 | -9  | 0.21  | 0.32  |      |
| - | 2   | -18 | 8     | -0.41 | 0.40 |
| 2 | -18 | -8  | 0.03  | 0.30  |      |
| 2 | -18 | -7  | -0.05 | 0.28  |      |
| 2 | 18  | -6  | 0.64  | 0.33  |      |
| 2 | -18 | -6  | 1.43  | 0.28  |      |
| 2 | -18 | -6  | 0.56  | 0.28  |      |

|   |     |     |       |       |      |
|---|-----|-----|-------|-------|------|
| 2 | 18  | -5  | 0.29  | 0.31  |      |
| 2 | -18 | -5  | -0.10 | 0.24  |      |
| 2 | -18 | -5  | -0.04 | 0.24  |      |
| 2 | 18  | -4  | 4.00  | 0.49  |      |
| 2 | -18 | -4  | 4.21  | 0.42  |      |
| 2 | 18  | -3  | 0.30  | 0.29  |      |
| - | 2   | -18 | 3     | 0.49  | 0.23 |
| 2 | -18 | -3  | 0.60  | 0.24  |      |
| 2 | -18 | -2  | 5.35  | 0.39  |      |
| - | 2   | -18 | 2     | 5.04  | 0.41 |
| - | 2   | -18 | 1     | 0.37  | 0.24 |
| 2 | -18 | -1  | 0.57  | 0.24  |      |
| - | 2   | -18 | 0     | 0.51  | 0.26 |
| 2 | -18 | 0   | 0.68  | 0.25  |      |
| - | 2   | -18 | -1    | 0.24  | 0.26 |
| 2 | -18 | 1   | 0.23  | 0.26  |      |
| 2 | -18 | 2   | -0.15 | 0.26  |      |
| - | 2   | -18 | -2    | 0.20  | 0.26 |
| - | 2   | -18 | -3    | 0.39  | 0.27 |
| - | 2   | -18 | -4    | 1.92  | 0.28 |
| 2 | -18 | 4   | 2.15  | 0.36  |      |
| 2 | -18 | 5   | 0.30  | 0.34  |      |
| - | 2   | -18 | -5    | -0.08 | 0.28 |
| 2 | -18 | 6   | 4.04  | 0.54  |      |
| - | 2   | -18 | -6    | 3.98  | 0.45 |
| 2 | -18 | 7   | 0.24  | 0.40  |      |
| - | 2   | -18 | -7    | 0.26  | 0.31 |
| 2 | -18 | 8   | -0.03 | 0.43  |      |
| - | 2   | -18 | -8    | 0.22  | 0.33 |
| - | 2   | -19 | 8     | 0.06  | 0.42 |
| 2 | -19 | -8  | 0.44  | 0.29  |      |
| 2 | -19 | -7  | 0.42  | 0.30  |      |
| 2 | 19  | -6  | 0.09  | 0.33  |      |
| 2 | -19 | -6  | 0.00  | 0.29  |      |
| 2 | 19  | -5  | 1.23  | 0.35  |      |
| 2 | -19 | -5  | 0.79  | 0.29  |      |
| 2 | 19  | -4  | 0.74  | 0.33  |      |
| 2 | -19 | -4  | 0.87  | 0.26  |      |
| 2 | -19 | -3  | 0.22  | 0.25  |      |
| - | 2   | -19 | 2     | 0.15  | 0.26 |
| 2 | -19 | -2  | 0.85  | 0.27  |      |
| 2 | -19 | -1  | 2.05  | 0.28  |      |
| - | 2   | -19 | 1     | 2.01  | 0.29 |
| - | 2   | -19 | 0     | 0.25  | 0.27 |
| 2 | -19 | 0   | 0.57  | 0.26  |      |
| 2 | -19 | 1   | 0.63  | 0.27  |      |
| - | 2   | -19 | -1    | 0.76  | 0.29 |
| - | 2   | -19 | -2    | 0.29  | 0.25 |
| 2 | -19 | 2   | 0.01  | 0.27  |      |
| 2 | -19 | 3   | -0.59 | 0.31  |      |
| - | 2   | -19 | -3    | 0.01  | 0.26 |
| - | 2   | -19 | -4    | 0.13  | 0.29 |
| 2 | -19 | 5   | 1.65  | 0.38  |      |
| - | 2   | -19 | -5    | 1.77  | 0.32 |

|   |     |     |       |       |      |
|---|-----|-----|-------|-------|------|
| 2 | -19 | 6   | 0.22  | 0.39  |      |
| - | 2   | -19 | -6    | 0.15  | 0.31 |
| 2 | -19 | 7   | 0.15  | 0.44  |      |
| - | 2   | -19 | -7    | 0.09  | 0.32 |
| 2 | -19 | 8   | 0.80  | 0.46  |      |
| - | 2   | -20 | 7     | -0.29 | 0.40 |
| 2 | -20 | -7  | 0.31  | 0.32  |      |
| 2 | -20 | -6  | 0.23  | 0.31  |      |
| 2 | 20  | -5  | 1.07  | 0.35  |      |
| 2 | -20 | -5  | 0.48  | 0.31  |      |
| 2 | -20 | -4  | 0.26  | 0.28  |      |
| - | 2   | -20 | 2     | -0.01 | 0.28 |
| 2 | -20 | -2  | 0.32  | 0.26  |      |
| - | 2   | -20 | 1     | 0.53  | 0.29 |
| 2 | -20 | -1  | 0.52  | 0.27  |      |
| 2 | -20 | 0   | 0.80  | 0.29  |      |
| - | 2   | -20 | 0     | 0.50  | 0.29 |
| - | 2   | -20 | -1    | 0.19  | 0.29 |
| 2 | -20 | 1   | 0.09  | 0.28  |      |
| 2 | -20 | 2   | 0.44  | 0.30  |      |
| - | 2   | -20 | -2    | 0.52  | 0.29 |
| - | 2   | -20 | -3    | 1.42  | 0.32 |
| 2 | -20 | 3   | 1.23  | 0.32  |      |
| - | 2   | -20 | -4    | 0.86  | 0.30 |
| 2 | -20 | 4   | 0.64  | 0.33  |      |
| - | 2   | -20 | -5    | 0.06  | 0.32 |
| - | 2   | -20 | -6    | 1.71  | 0.35 |
| 2 | -20 | 7   | 0.43  | 0.47  |      |
| - | 2   | -21 | 7     | -0.48 | 0.42 |
| - | 2   | -21 | 6     | -0.36 | 0.39 |
| 2 | -21 | -5  | 0.54  | 0.33  |      |
| 2 | -21 | -4  | 0.37  | 0.30  |      |
| 2 | -21 | -3  | 0.46  | 0.32  |      |
| - | 2   | -21 | 2     | 1.33  | 0.31 |
| - | 2   | -21 | 1     | 2.60  | 0.34 |
| - | 2   | -21 | 0     | 0.66  | 0.31 |
| 2 | -21 | 1   | 2.93  | 0.34  |      |
| - | 2   | -21 | -1    | 2.67  | 0.35 |
| - | 2   | -21 | -2    | 1.23  | 0.33 |
| 2 | -21 | 2   | 1.19  | 0.32  |      |
| 2 | -21 | 3   | 0.33  | 0.32  |      |
| - | 2   | -21 | -3    | 0.43  | 0.33 |
| - | 2   | -21 | -4    | 2.02  | 0.36 |
| 2 | -21 | 4   | 1.59  | 0.39  |      |
| 2 | -22 | -3  | -0.19 | 0.34  |      |
| 2 | -22 | -2  | 0.23  | 0.33  |      |
| - | 2   | -22 | 1     | 0.91  | 0.33 |
| - | 2   | -22 | 0     | 0.19  | 0.33 |
| - | 2   | -22 | -1    | 1.33  | 0.35 |
| - | 2   | -22 | -2    | 0.41  | 0.32 |
| - | 2   | -22 | -3    | 0.87  | 0.36 |
| - | 2   | -23 | 1     | 0.35  | 0.35 |
| - | 2   | -23 | 0     | 0.43  | 0.38 |
| 3 | 0   | -15 | -0.54 | 0.35  |      |

|   |   |     |        |        |
|---|---|-----|--------|--------|
| 3 | 0 | -14 | 0.70   | 0.32   |
| 3 | 0 | -13 | -0.22  | 0.28   |
| 3 | 0 | -12 | 2.15   | 0.28   |
| - | 3 | 0   | 11     | 0.22   |
| 3 | 0 | -11 | -0.06  | 0.21   |
| - | 3 | 0   | 10     | 55.04  |
| 3 | 0 | -10 | 54.10  | 1.91   |
| 3 | 0 | -9  | -0.05  | 0.18   |
| 3 | 0 | -8  | 19.46  | 0.80   |
| 3 | 0 | -8  | 24.60  | 0.97   |
| 3 | 0 | -7  | -0.15  | 0.13   |
| 3 | 0 | -7  | 0.10   | 0.13   |
| 3 | 0 | -7  | -0.07  | 0.06   |
| 3 | 0 | -6  | 18.75  | 0.70   |
| 3 | 0 | -6  | 20.03  | 0.85   |
| 3 | 0 | -5  | -0.03  | 0.09   |
| 3 | 0 | -5  | 0.08   | 0.09   |
| - | 3 | 0   | 4      | 152.17 |
| 3 | 0 | -4  | 144.31 | 6.21   |
| 3 | 0 | -3  | 0.04   | 0.06   |
| - | 3 | 0   | 3      | 0.03   |
| 3 | 0 | -3  | 0.03   | 0.06   |
| 3 | 0 | -2  | 130.64 | 5.49   |
| 3 | 0 | -2  | 128.00 | 4.46   |
| - | 3 | 0   | 2      | 133.67 |
| 3 | 0 | -1  | 0.07   | 0.04   |
| 3 | 0 | -1  | 0.13   | 0.07   |
| 3 | 0 | 0   | 368.56 | 15.44  |
| - | 3 | 0   | -1     | -0.01  |
| - | 3 | 0   | -1     | 0.15   |
| - | 3 | 0   | -2     | 2.76   |
| 3 | 0 | 3   | -0.11  | 0.11   |
| - | 3 | 0   | -3     | -0.08  |
| - | 3 | 0   | -3     | -0.01  |
| - | 3 | 0   | -4     | 50.86  |
| 3 | 0 | 4   | 55.78  | 2.23   |
| - | 3 | 0   | -4     | 52.32  |
| - | 3 | 0   | -5     | -0.16  |
| 3 | 0 | 5   | -0.06  | 0.15   |
| - | 3 | 0   | -5     | 0.01   |
| - | 3 | 0   | -6     | 98.66  |
| - | 3 | 0   | -6     | 97.01  |
| 3 | 0 | 6   | 94.47  | 4.06   |
| 3 | 0 | 7   | -0.25  | 0.20   |
| - | 3 | 0   | -7     | -0.17  |
| - | 3 | 0   | -7     | 0.13   |
| - | 3 | 0   | -8     | 6.06   |
| - | 3 | 0   | -8     | 6.31   |
| 3 | 0 | 8   | 6.18   | 0.43   |
| - | 3 | 0   | -9     | -0.09  |
| 3 | 0 | 9   | 0.06   | 0.25   |
| 3 | 0 | 10  | 14.93  | 0.75   |
| - | 3 | 0   | -10    | 14.05  |
| 3 | 0 | 11  | 0.29   | 0.30   |

|   |   |    |     |        |       |
|---|---|----|-----|--------|-------|
| - | 3 | 0  | -11 | -0.18  | 0.25  |
|   | 3 | 0  | 12  | 1.30   | 0.34  |
| - | 3 | 0  | -12 | 0.72   | 0.29  |
| - | 3 | 0  | -13 | -0.19  | 0.31  |
| - | 3 | 0  | -14 | 1.22   | 0.36  |
|   | 3 | 1  | -15 | 1.07   | 0.37  |
|   | 3 | -1 | -15 | 0.91   | 0.37  |
|   | 3 | 1  | -14 | -0.48  | 0.29  |
|   | 3 | -1 | -14 | -0.50  | 0.31  |
|   | 3 | 1  | -13 | 0.03   | 0.26  |
|   | 3 | -1 | -13 | 0.05   | 0.26  |
|   | 3 | 1  | -12 | 1.75   | 0.28  |
|   | 3 | -1 | -12 | 1.47   | 0.26  |
| - | 3 | -1 | 12  | 1.71   | 0.28  |
|   | 3 | 1  | -11 | 45.21  | 1.64  |
| - | 3 | -1 | 11  | 46.47  | 1.98  |
|   | 3 | -1 | -11 | 46.12  | 1.64  |
| - | 3 | 1  | 10  | 7.85   | 0.44  |
|   | 3 | 1  | -10 | 7.65   | 0.40  |
| - | 3 | -1 | 10  | 8.37   | 0.46  |
|   | 3 | -1 | -10 | 7.58   | 0.40  |
| - | 3 | 1  | 9   | 5.13   | 0.35  |
|   | 3 | 1  | -9  | 5.72   | 0.35  |
|   | 3 | 1  | -9  | 5.03   | 0.38  |
|   | 3 | -1 | -9  | 5.54   | 0.32  |
|   | 3 | 1  | -8  | 0.94   | 0.16  |
|   | 3 | 1  | -8  | 0.65   | 0.16  |
|   | 3 | -1 | -8  | 0.75   | 0.16  |
|   | 3 | 1  | -7  | 19.73  | 0.73  |
|   | 3 | 1  | -7  | 19.62  | 0.87  |
|   | 3 | -1 | -7  | 20.26  | 0.72  |
|   | 3 | -1 | -7  | 19.62  | 0.86  |
|   | 3 | -1 | -7  | 19.30  | 0.72  |
|   | 3 | 1  | -6  | 136.29 | 4.75  |
|   | 3 | 1  | -6  | 134.80 | 4.96  |
|   | 3 | 1  | -6  | 145.00 | 5.84  |
|   | 3 | -1 | -6  | 140.51 | 4.75  |
|   | 3 | -1 | -6  | 142.65 | 5.86  |
|   | 3 | 1  | -5  | 29.66  | 1.05  |
|   | 3 | 1  | -5  | 30.32  | 1.28  |
|   | 3 | -1 | -5  | 29.82  | 1.05  |
|   | 3 | -1 | -5  | 30.38  | 1.27  |
| - | 3 | 1  | 4   | 2.19   | 0.12  |
|   | 3 | 1  | -4  | 2.08   | 0.17  |
| - | 3 | -1 | 4   | 2.18   | 0.11  |
|   | 3 | -1 | -4  | 2.14   | 0.16  |
|   | 3 | -1 | -4  | 1.91   | 0.15  |
|   | 3 | 1  | -3  | 56.71  | 2.29  |
|   | 3 | 1  | -3  | 54.30  | 1.86  |
| - | 3 | 1  | 3   | 56.14  | 1.95  |
| - | 3 | -1 | 3   | 57.84  | 1.94  |
|   | 3 | -1 | -3  | 46.36  | 1.86  |
|   | 3 | -1 | -3  | 56.38  | 2.28  |
|   | 3 | 1  | -2  | 367.80 | 13.13 |

|   |    |    |        |         |       |
|---|----|----|--------|---------|-------|
| 3 | 1  | -2 | 401.83 | 16.18   |       |
| - | 3  | 1  | 2      | 405.47  | 13.78 |
| - | 3  | -1 | 2      | 377.00  | 13.77 |
| 3 | -1 | -2 | 392.39 | 16.15   |       |
| 3 | -1 | -2 | 377.09 | 13.86   |       |
| - | 3  | 1  | 1      | 1000.00 | 31.98 |
| 3 | 1  | -1 | 906.86 | 30.08   |       |
| 3 | 1  | -1 | 761.59 | 37.40   |       |
| 3 | -1 | -1 | 889.13 | 30.22   |       |
| 3 | -1 | -1 | 889.55 | 37.57   |       |
| - | 3  | -1 | 1      | 805.22  | 31.78 |
| - | 3  | -1 | 0      | 72.90   | 2.78  |
| 3 | -1 | 0  | 82.57  | 3.26    |       |
| - | 3  | 1  | -1     | 102.60  | 3.69  |
| 3 | 1  | 1  | 89.26  | 4.33    |       |
| - | 3  | 1  | -1     | 111.61  | 3.53  |
| - | 3  | -1 | -1     | 111.40  | 3.53  |
| - | 3  | 1  | -2     | 59.27   | 2.12  |
| 3 | 1  | 3  | 47.22  | 2.05    |       |
| - | 3  | 1  | -3     | 49.48   | 1.66  |
| 3 | -1 | 3  | 48.83  | 2.05    |       |
| - | 3  | -1 | -3     | 47.76   | 1.75  |
| - | 3  | -1 | -3     | 49.97   | 1.66  |
| - | 3  | 1  | -4     | 2.64    | 0.18  |
| - | 3  | 1  | -4     | 2.25    | 0.19  |
| 3 | 1  | 4  | 2.76   | 0.21    |       |
| 3 | -1 | 4  | 2.59   | 0.24    |       |
| - | 3  | -1 | -4     | 2.38    | 0.19  |
| - | 3  | -1 | -4     | 2.45    | 0.16  |
| - | 3  | 1  | -5     | 13.48   | 0.49  |
| - | 3  | 1  | -5     | 13.45   | 0.54  |
| 3 | 1  | 5  | 13.79  | 0.62    |       |
| - | 3  | -1 | -5     | 13.26   | 0.49  |
| 3 | -1 | 5  | 12.70  | 0.61    |       |
| - | 3  | -1 | -5     | 13.03   | 0.53  |
| 3 | 1  | 6  | 1.00   | 0.18    |       |
| - | 3  | 1  | -6     | 1.08    | 0.13  |
| - | 3  | 1  | -6     | 0.83    | 0.14  |
| - | 3  | -1 | -6     | 1.04    | 0.13  |
| 3 | -1 | 6  | 1.05   | 0.18    |       |
| - | 3  | -1 | -6     | 1.25    | 0.14  |
| - | 3  | 1  | -7     | 15.20   | 0.59  |
| - | 3  | 1  | -7     | 14.95   | 0.62  |
| 3 | 1  | 7  | 14.74  | 0.72    |       |
| - | 3  | -1 | -7     | 14.82   | 0.58  |
| - | 3  | -1 | -7     | 15.35   | 0.62  |
| 3 | -1 | 7  | 14.96  | 0.73    |       |
| - | 3  | 1  | -8     | 19.03   | 0.72  |
| 3 | 1  | 8  | 19.35  | 0.90    |       |
| - | 3  | 1  | -8     | 19.46   | 0.77  |
| 3 | -1 | 8  | 18.91  | 0.89    |       |
| - | 3  | -1 | -8     | 18.73   | 0.73  |
| - | 3  | -1 | -8     | 20.41   | 0.78  |
| - | 3  | 1  | -9     | 0.71    | 0.20  |

|   |    |        |       |      |
|---|----|--------|-------|------|
| 3 | 1  | 9      | 0.53  | 0.25 |
| - | 3  | -1 -9  | 0.65  | 0.18 |
| 3 | -1 | 9      | 1.02  | 0.26 |
| - | 3  | 1 -10  | 5.68  | 0.39 |
| 3 | 1  | 10     | 6.02  | 0.47 |
| - | 3  | -1 -10 | 5.44  | 0.38 |
| 3 | -1 | 10     | 5.36  | 0.48 |
| 3 | 1  | 11     | 8.09  | 0.56 |
| - | 3  | 1 -11  | 7.86  | 0.48 |
| - | 3  | -1 -11 | 7.81  | 0.47 |
| 3 | -1 | 11     | 7.94  | 0.56 |
| - | 3  | 1 -12  | 0.42  | 0.28 |
| 3 | 1  | 12     | 1.07  | 0.34 |
| - | 3  | -1 -12 | 0.51  | 0.28 |
| 3 | -1 | 12     | 1.01  | 0.35 |
| - | 3  | 1 -13  | 3.57  | 0.36 |
| 3 | -1 | 13     | 3.94  | 0.52 |
| - | 3  | -1 -13 | 2.79  | 0.35 |
| - | 3  | -1 -14 | 0.59  | 0.34 |
| 3 | 2  | -15    | 1.99  | 0.38 |
| 3 | -2 | -15    | 1.95  | 0.38 |
| 3 | 2  | -14    | 9.49  | 0.58 |
| 3 | -2 | -14    | 9.26  | 0.58 |
| 3 | 2  | -13    | 3.95  | 0.44 |
| - | 3  | -2 13  | 3.83  | 0.44 |
| 3 | -2 | -13    | 3.51  | 0.35 |
| 3 | 2  | -12    | 5.62  | 0.39 |
| - | 3  | -2 12  | 5.45  | 0.45 |
| 3 | -2 | -12    | 5.53  | 0.42 |
| 3 | 2  | -11    | 0.08  | 0.23 |
| 3 | -2 | -11    | -0.14 | 0.23 |
| - | 3  | -2 11  | 0.10  | 0.24 |
| - | 3  | 2 10   | 1.12  | 0.19 |
| 3 | 2  | -10    | 1.13  | 0.22 |
| - | 3  | -2 10  | 1.23  | 0.23 |
| 3 | -2 | -10    | 1.21  | 0.23 |
| - | 3  | 2 9    | 0.58  | 0.16 |
| 3 | 2  | -9     | 0.81  | 0.19 |
| 3 | 2  | -9     | 0.37  | 0.19 |
| 3 | -2 | -9     | 0.56  | 0.18 |
| - | 3  | 2 8    | 23.33 | 0.99 |
| 3 | 2  | -8     | 22.95 | 1.01 |
| 3 | 2  | -8     | 22.28 | 0.83 |
| 3 | 2  | -7     | 1.29  | 0.15 |
| 3 | 2  | -7     | 1.37  | 0.17 |
| 3 | -2 | -7     | 1.34  | 0.14 |
| 3 | 2  | -6     | 18.70 | 0.69 |
| 3 | 2  | -6     | 19.69 | 0.83 |
| 3 | -2 | -6     | 18.10 | 0.69 |
| 3 | -2 | -6     | 18.94 | 0.82 |
| 3 | 2  | -5     | 13.33 | 0.57 |
| 3 | 2  | -5     | 12.34 | 0.47 |
| 3 | -2 | -5     | 12.27 | 0.47 |
| 3 | -2 | -5     | 12.58 | 0.55 |

|   |    |    |        |        |      |
|---|----|----|--------|--------|------|
| 3 | 2  | -4 | 74.88  | 3.06   |      |
| - | 3  | 2  | 4      | 75.42  | 2.60 |
| - | 3  | -2 | 4      | 72.88  | 2.60 |
| 3 | -2 | -4 | 69.54  | 2.49   |      |
| 3 | -2 | -4 | 72.64  | 3.05   |      |
| 3 | 2  | -3 | 3.40   | 0.15   |      |
| - | 3  | 2  | 3      | 3.35   | 0.15 |
| 3 | 2  | -3 | 3.33   | 0.20   |      |
| - | 3  | -2 | 3      | 3.27   | 0.14 |
| 3 | -2 | -3 | 3.55   | 0.18   |      |
| 3 | 2  | -2 | 63.00  | 2.74   |      |
| - | 3  | 2  | 2      | 66.54  | 2.33 |
| 3 | 2  | -2 | 64.52  | 2.22   |      |
| 3 | -2 | -2 | 67.42  | 2.23   |      |
| 3 | -2 | -2 | 65.89  | 2.73   |      |
| - | 3  | -2 | 2      | 65.25  | 2.33 |
| 3 | 2  | -1 | 22.92  | 0.78   |      |
| - | 3  | 2  | 1      | 23.40  | 0.83 |
| - | 3  | -2 | 1      | 23.40  | 0.83 |
| 3 | -2 | -1 | 21.43  | 0.97   |      |
| 3 | -2 | -1 | 23.34  | 0.79   |      |
| 3 | 2  | 0  | 266.35 | 10.98  |      |
| 3 | 2  | 0  | 252.14 | 8.86   |      |
| - | 3  | -2 | 0      | 261.84 | 9.35 |
| 3 | -2 | 0  | 267.08 | 10.96  |      |
| - | 3  | 2  | -1     | 1.85   | 0.13 |
| - | 3  | 2  | -1     | 1.84   | 0.12 |
| 3 | 2  | 1  | 1.12   | 0.17   |      |
| 3 | -2 | 1  | 1.80   | 0.14   |      |
| - | 3  | -2 | -1     | 1.68   | 0.08 |
| - | 3  | 2  | -2     | 76.48  | 3.05 |
| - | 3  | -2 | -2     | 93.51  | 3.05 |
| 3 | 2  | 3  | 10.98  | 0.53   |      |
| - | 3  | 2  | -3     | 11.83  | 0.42 |
| - | 3  | -2 | -3     | 11.68  | 0.42 |
| - | 3  | -2 | -3     | 11.59  | 0.45 |
| 3 | 2  | 4  | 5.36   | 0.32   |      |
| - | 3  | 2  | -4     | 5.62   | 0.24 |
| - | 3  | 2  | -4     | 5.27   | 0.27 |
| - | 3  | -2 | -4     | 5.65   | 0.27 |
| 3 | -2 | 4  | 5.72   | 0.33   |      |
| - | 3  | -2 | -4     | 5.35   | 0.24 |
| - | 3  | 2  | -5     | 9.89   | 0.39 |
| - | 3  | 2  | -5     | 9.02   | 0.41 |
| 3 | 2  | 5  | 9.28   | 0.48   |      |
| - | 3  | -2 | -5     | 9.61   | 0.38 |
| 3 | -2 | 5  | 9.97   | 0.48   |      |
| - | 3  | -2 | -5     | 9.37   | 0.41 |
| - | 3  | 2  | -6     | 13.52  | 0.57 |
| - | 3  | 2  | -6     | 14.14  | 0.54 |
| 3 | 2  | 6  | 14.19  | 0.67   |      |
| - | 3  | -2 | -6     | 14.04  | 0.58 |
| - | 3  | -2 | -6     | 14.72  | 0.54 |
| 3 | -2 | 6  | 14.52  | 0.67   |      |

|   |   |    |     |       |      |
|---|---|----|-----|-------|------|
| - | 3 | 2  | -7  | 34.59 | 1.23 |
|   | 3 | 2  | 7   | 35.07 | 1.52 |
| - | 3 | 2  | -7  | 34.25 | 1.29 |
|   | 3 | -2 | 7   | 34.74 | 1.52 |
| - | 3 | -2 | -7  | 35.48 | 1.23 |
| - | 3 | -2 | -7  | 35.73 | 1.30 |
|   | 3 | 2  | 8   | 25.90 | 1.13 |
| - | 3 | 2  | -8  | 25.46 | 0.93 |
| - | 3 | 2  | -8  | 23.95 | 0.96 |
| - | 3 | -2 | -8  | 25.00 | 0.92 |
|   | 3 | -2 | 8   | 25.01 | 1.13 |
| - | 3 | -2 | -8  | 26.13 | 0.97 |
|   | 3 | 2  | 9   | 1.17  | 0.25 |
| - | 3 | 2  | -9  | 0.89  | 0.20 |
| - | 3 | -2 | -9  | 1.25  | 0.20 |
| - | 3 | -2 | -9  | 1.07  | 0.21 |
|   | 3 | -2 | 9   | 1.37  | 0.28 |
|   | 3 | 2  | 10  | 16.55 | 0.80 |
| - | 3 | 2  | -10 | 15.73 | 0.65 |
|   | 3 | -2 | 10  | 16.01 | 0.82 |
| - | 3 | -2 | -10 | 15.50 | 0.65 |
| - | 3 | 2  | -11 | 3.65  | 0.36 |
|   | 3 | 2  | 11  | 4.42  | 0.50 |
| - | 3 | -2 | -11 | 3.82  | 0.38 |
|   | 3 | -2 | 11  | 4.05  | 0.48 |
| - | 3 | 2  | -12 | 0.37  | 0.29 |
| - | 3 | -2 | -12 | 0.16  | 0.27 |
|   | 3 | -2 | 12  | 0.12  | 0.34 |
| - | 3 | 2  | -13 | 0.96  | 0.33 |
|   | 3 | -2 | 13  | 0.78  | 0.38 |
| - | 3 | -2 | -13 | 0.41  | 0.30 |
| - | 3 | -2 | -14 | 2.01  | 0.36 |
|   | 3 | 3  | -15 | 1.77  | 0.39 |
|   | 3 | -3 | -15 | 1.39  | 0.38 |
|   | 3 | 3  | -14 | -0.26 | 0.31 |
|   | 3 | -3 | -14 | -0.35 | 0.29 |
|   | 3 | 3  | -13 | 4.57  | 0.44 |
| - | 3 | -3 | 13  | 4.53  | 0.47 |
|   | 3 | -3 | -13 | 4.53  | 0.45 |
|   | 3 | 3  | -12 | 2.05  | 0.29 |
| - | 3 | -3 | 12  | 2.21  | 0.30 |
|   | 3 | -3 | -12 | 1.70  | 0.27 |
|   | 3 | 3  | -11 | 32.65 | 1.20 |
| - | 3 | -3 | 11  | 32.90 | 1.45 |
|   | 3 | -3 | -11 | 32.01 | 1.19 |
|   | 3 | 3  | -10 | 8.41  | 0.42 |
|   | 3 | -3 | -10 | 7.94  | 0.45 |
|   | 3 | 3  | -9  | -0.08 | 0.18 |
| - | 3 | 3  | 9   | 0.19  | 0.15 |
|   | 3 | 3  | -9  | 0.13  | 0.17 |
|   | 3 | -3 | -9  | 0.10  | 0.17 |
|   | 3 | 3  | -8  | 0.01  | 0.17 |
|   | 3 | 3  | -8  | 0.13  | 0.14 |
| - | 3 | 3  | 8   | 0.03  | 0.11 |

|   |    |    |        |        |
|---|----|----|--------|--------|
| 3 | -3 | -8 | 0.25   | 0.11   |
| 3 | -3 | -8 | -0.03  | 0.05   |
| 3 | 3  | -7 | 80.36  | 2.87   |
| 3 | 3  | -7 | 87.49  | 3.53   |
| 3 | 3  | -6 | 1.06   | 0.14   |
| 3 | 3  | -6 | 1.04   | 0.13   |
| 3 | -3 | -6 | 0.90   | 0.11   |
| 3 | 3  | -5 | 14.61  | 0.54   |
| 3 | 3  | -5 | 15.22  | 0.67   |
| 3 | -3 | -5 | 14.76  | 0.64   |
| - | 3  | 3  | 4      | 0.29   |
| 3 | 3  | -4 | 0.12   | 0.03   |
| 3 | 3  | -4 | 0.25   | 0.11   |
| - | 3  | -3 | 4      | 0.53   |
| 3 | -3 | -4 | 0.30   | 0.06   |
| 3 | -3 | -4 | 0.22   | 0.08   |
| 3 | 3  | -3 | 111.99 | 3.87   |
| 3 | 3  | -3 | 113.45 | 4.75   |
| - | 3  | 3  | 3      | 116.97 |
| 3 | -3 | -3 | 112.55 | 4.74   |
| - | 3  | -3 | 3      | 113.31 |
| 3 | 3  | -2 | 71.76  | 2.42   |
| - | 3  | 3  | 2      | 71.65  |
| - | 3  | -3 | 2      | 71.89  |
| 3 | -3 | -2 | 69.49  | 2.97   |
| 3 | 3  | -1 | 71.89  | 2.37   |
| 3 | -3 | -1 | 71.38  | 2.92   |
| - | 3  | -3 | 1      | 71.69  |
| 3 | -3 | -1 | 64.97  | 2.38   |
| 3 | 3  | 0  | 123.27 | 5.14   |
| - | 3  | -3 | 0      | 120.31 |
| 3 | -3 | 0  | 125.51 | 5.15   |
| 3 | 3  | 1  | 13.90  | 0.70   |
| 3 | -3 | 1  | 17.17  | 0.70   |
| - | 3  | -3 | -1     | 16.90  |
| - | 3  | 3  | -2     | 52.21  |
| - | 3  | -3 | -2     | 47.22  |
| - | 3  | -3 | -2     | 52.92  |
| 3 | -3 | 2  | 53.56  | 2.17   |
| - | 3  | 3  | -3     | 200.62 |
| 3 | 3  | 3  | 179.56 | 8.12   |
| - | 3  | -3 | -3     | 195.26 |
| - | 3  | -3 | -3     | 201.72 |
| - | 3  | 3  | -4     | 119.29 |
| 3 | 3  | 4  | 117.71 | 5.01   |
| - | 3  | 3  | -4     | 123.72 |
| - | 3  | -3 | -4     | 119.41 |
| 3 | -3 | 4  | 118.86 | 5.01   |
| - | 3  | -3 | -4     | 120.77 |
| - | 3  | 3  | -5     | 12.25  |
| - | 3  | 3  | -5     | 12.81  |
| 3 | 3  | 5  | 12.31  | 0.60   |
| - | 3  | -3 | -5     | 13.01  |
| - | 3  | -3 | -5     | 12.69  |

|   |    |     |       |       |
|---|----|-----|-------|-------|
| 3 | -3 | 5   | 13.10 | 0.61  |
| - | 3  | 3   | -6    | 6.70  |
| - | 3  | 3   | -6    | 7.79  |
| 3 | 3  | 6   | 7.25  | 0.43  |
| - | 3  | -3  | -6    | 7.53  |
| - | 3  | -3  | -6    | 7.17  |
| 3 | -3 | 6   | 7.66  | 0.41  |
| - | 3  | 3   | -7    | 4.04  |
| 3 | 3  | 7   | 4.60  | 0.34  |
| - | 3  | 3   | -7    | 3.52  |
| - | 3  | -3  | -7    | 4.63  |
| 3 | -3 | 7   | 5.08  | 0.38  |
| - | 3  | -3  | -7    | 4.73  |
| - | 3  | 3   | -8    | 13.46 |
| 3 | 3  | 8   | 14.17 | 0.67  |
| - | 3  | -3  | -8    | 13.76 |
| 3 | -3 | 8   | 13.56 | 0.70  |
| - | 3  | -3  | -8    | 13.18 |
| 3 | 3  | 9   | 10.88 | 0.57  |
| - | 3  | 3   | -9    | 10.24 |
| 3 | -3 | 9   | 9.86  | 0.61  |
| - | 3  | -3  | -9    | 10.34 |
| - | 3  | -3  | -9    | 10.68 |
| 3 | 3  | 10  | 0.26  | 0.26  |
| - | 3  | 3   | -10   | 0.00  |
| - | 3  | -3  | -10   | 0.02  |
| 3 | -3 | 10  | 0.28  | 0.30  |
| - | 3  | 3   | -11   | 8.06  |
| - | 3  | -3  | -11   | 8.07  |
| 3 | -3 | 11  | 8.42  | 0.59  |
| - | 3  | 3   | -12   | 7.48  |
| 3 | -3 | 12  | 7.48  | 0.59  |
| - | 3  | -3  | -12   | 7.29  |
| - | 3  | 3   | -13   | 2.59  |
| 3 | -3 | 13  | 2.70  | 0.43  |
| - | 3  | -3  | -13   | 2.54  |
| 3 | -3 | 14  | 0.57  | 0.41  |
| - | 3  | -3  | -14   | -0.65 |
| 3 | 4  | -14 | 4.94  | 0.45  |
| - | 3  | -4  | 14    | 4.78  |
| 3 | -4 | -14 | 4.24  | 0.49  |
| 3 | 4  | -13 | 2.20  | 0.30  |
| - | 3  | -4  | 13    | 2.34  |
| 3 | -4 | -13 | 1.76  | 0.30  |
| 3 | 4  | -12 | 1.61  | 0.27  |
| 3 | -4 | -12 | 1.52  | 0.28  |
| - | 3  | -4  | 12    | 1.58  |
| 3 | 4  | -11 | 15.25 | 0.66  |
| 3 | -4 | -11 | 15.14 | 0.66  |
| - | 3  | -4  | 11    | 15.08 |
| 3 | 4  | -10 | 3.51  | 0.31  |
| 3 | -4 | -10 | 3.45  | 0.35  |
| 3 | 4  | -9  | 30.67 | 1.11  |
| 3 | 4  | -9  | 30.06 | 1.33  |

|   |    |    |        |             |
|---|----|----|--------|-------------|
| 3 | -4 | -9 | 30.67  | 1.10        |
| 3 | 4  | -8 | 32.55  | 1.15        |
| 3 | 4  | -8 | 32.52  | 1.40        |
| 3 | -4 | -8 | 30.03  | 1.14        |
| 3 | -4 | -8 | 33.23  | 1.18        |
| 3 | 4  | -7 | 0.23   | 0.13        |
| 3 | 4  | -7 | 0.14   | 0.17        |
| - | 3  | 4  | 7      | 0.24 0.09   |
| 3 | -4 | -7 | 0.12   | 0.11        |
| 3 | 4  | -6 | 2.17   | 0.25        |
| 3 | 4  | -6 | 2.34   | 0.18        |
| 3 | -4 | -6 | 1.89   | 0.19        |
| 3 | 4  | -5 | 17.35  | 0.63        |
| 3 | 4  | -5 | 17.59  | 0.77        |
| 3 | -4 | -5 | 17.37  | 0.74        |
| 3 | 4  | -4 | 20.88  | 0.88        |
| - | 3  | -4 | 4      | 19.48 0.72  |
| 3 | -4 | -4 | 19.94  | 0.85        |
| - | 3  | 4  | 3      | 57.09 1.99  |
| 3 | 4  | -3 | 55.61  | 1.90        |
| 3 | -4 | -3 | 55.04  | 2.32        |
| - | 3  | -4 | 3      | 55.26 1.98  |
| - | 3  | 4  | 2      | 9.25 0.35   |
| 3 | 4  | -2 | 9.30   | 0.32        |
| 3 | -4 | -2 | 8.22   | 0.39        |
| - | 3  | -4 | 2      | 9.14 0.34   |
| 3 | 4  | -1 | 0.34   | 0.03        |
| - | 3  | -4 | 1      | 0.20 0.06   |
| 3 | -4 | -1 | 0.25   | 0.08        |
| - | 3  | -4 | 0      | 38.77 1.39  |
| 3 | -4 | 0  | 38.64  | 1.63        |
| - | 3  | 4  | -1     | 0.13 0.03   |
| 3 | -4 | 1  | 0.35   | 0.09        |
| - | 3  | -4 | -1     | 0.11 0.05   |
| - | 3  | 4  | -2     | 18.45 0.66  |
| - | 3  | -4 | -2     | 18.82 0.64  |
| - | 3  | -4 | -2     | 18.64 0.69  |
| 3 | -4 | 2  | 18.69  | 0.81        |
| 3 | 4  | 3  | 131.21 | 5.91        |
| - | 3  | 4  | -3     | 144.59 4.79 |
| - | 3  | 4  | -3     | 142.12 5.05 |
| - | 3  | -4 | -3     | 143.91 4.80 |
| 3 | -4 | 3  | 144.76 | 5.89        |
| - | 3  | -4 | -3     | 140.58 5.06 |
| 3 | 4  | 4  | 68.62  | 2.96        |
| - | 3  | 4  | -4     | 70.45 2.52  |
| - | 3  | 4  | -4     | 70.82 2.40  |
| - | 3  | -4 | -4     | 70.22 2.52  |
| - | 3  | -4 | -4     | 71.09 2.39  |
| - | 3  | 4  | -5     | 73.78 2.61  |
| - | 3  | 4  | -5     | 75.65 2.49  |
| 3 | 4  | 5  | 74.82  | 3.06        |
| - | 3  | -4 | -5     | 72.70 2.60  |
| 3 | -4 | 5  | 63.69  | 3.06        |

|   |   |    |     |       |      |
|---|---|----|-----|-------|------|
| - | 3 | -4 | -5  | 75.08 | 2.48 |
| - | 3 | 4  | -6  | 19.55 | 0.72 |
| - | 3 | 4  | -6  | 19.26 | 0.75 |
|   | 3 | 4  | 6   | 19.62 | 0.88 |
|   | 3 | -4 | 6   | 19.89 | 0.90 |
| - | 3 | -4 | -6  | 19.87 | 0.71 |
| - | 3 | -4 | -6  | 18.94 | 0.75 |
|   | 3 | 4  | 7   | 12.05 | 0.60 |
| - | 3 | 4  | -7  | 11.80 | 0.49 |
| - | 3 | 4  | -7  | 11.10 | 0.50 |
| - | 3 | -4 | -7  | 11.55 | 0.51 |
|   | 3 | -4 | 7   | 12.54 | 0.62 |
| - | 3 | -4 | -7  | 11.94 | 0.48 |
|   | 3 | 4  | 8   | 1.70  | 0.24 |
| - | 3 | 4  | -8  | 1.46  | 0.21 |
| - | 3 | -4 | -8  | 1.53  | 0.20 |
|   | 3 | -4 | 8   | 1.68  | 0.27 |
| - | 3 | -4 | -8  | 1.62  | 0.20 |
| - | 3 | 4  | -9  | 21.19 | 0.83 |
|   | 3 | 4  | 9   | 23.85 | 1.02 |
|   | 3 | -4 | 9   | 21.06 | 1.03 |
| - | 3 | -4 | -9  | 22.01 | 0.87 |
| - | 3 | -4 | -9  | 21.58 | 0.82 |
|   | 3 | 4  | 10  | 19.76 | 0.91 |
| - | 3 | 4  | -10 | 18.66 | 0.77 |
|   | 3 | -4 | 10  | 18.10 | 0.93 |
| - | 3 | -4 | -10 | 18.90 | 0.76 |
| - | 3 | 4  | -11 | 0.36  | 0.27 |
| - | 3 | -4 | -11 | 0.28  | 0.24 |
|   | 3 | -4 | 11  | 0.44  | 0.34 |
| - | 3 | 4  | -12 | 0.25  | 0.30 |
|   | 3 | -4 | 12  | 0.11  | 0.37 |
| - | 3 | -4 | -12 | -0.29 | 0.27 |
| - | 3 | 4  | -13 | 0.16  | 0.33 |
|   | 3 | -4 | 13  | 0.06  | 0.39 |
| - | 3 | -4 | -13 | -0.37 | 0.31 |
| - | 3 | -4 | -14 | 1.50  | 0.35 |
|   | 3 | 5  | -14 | 0.39  | 0.34 |
| - | 3 | -5 | 14  | 0.34  | 0.35 |
|   | 3 | -5 | -14 | 0.08  | 0.33 |
|   | 3 | 5  | -13 | 0.50  | 0.30 |
|   | 3 | -5 | -13 | 0.23  | 0.29 |
| - | 3 | -5 | 13  | 0.18  | 0.32 |
|   | 3 | 5  | -12 | 3.79  | 0.40 |
| - | 3 | -5 | 12  | 3.15  | 0.45 |
|   | 3 | -5 | -12 | 2.98  | 0.30 |
|   | 3 | 5  | -11 | 11.08 | 0.54 |
| - | 3 | -5 | 11  | 10.68 | 0.64 |
|   | 3 | -5 | -11 | 11.09 | 0.52 |
|   | 3 | 5  | -10 | 6.62  | 0.41 |
|   | 3 | 5  | -10 | 6.82  | 0.46 |
|   | 3 | -5 | -10 | 6.39  | 0.39 |
|   | 3 | 5  | -9  | -0.03 | 0.21 |
|   | 3 | 5  | -9  | 0.38  | 0.19 |

|   |    |    |        |        |      |
|---|----|----|--------|--------|------|
| 3 | -5 | -9 | 0.15   | 0.14   |      |
| 3 | -5 | -9 | -0.23  | 0.18   |      |
| 3 | 5  | -8 | 23.85  | 1.07   |      |
| 3 | 5  | -8 | 23.44  | 0.88   |      |
| 3 | -5 | -8 | 24.61  | 0.90   |      |
| 3 | -5 | -8 | 23.77  | 0.88   |      |
| 3 | 5  | -7 | 6.13   | 0.37   |      |
| 3 | 5  | -7 | 6.36   | 0.32   |      |
| 3 | -5 | -7 | 5.97   | 0.34   |      |
| 3 | 5  | -6 | 36.25  | 1.28   |      |
| - | 3  | 5  | 6      | 34.71  | 1.54 |
| 3 | 5  | -6 | 37.43  | 1.57   |      |
| 3 | -5 | -6 | 38.55  | 1.29   |      |
| 3 | 5  | -5 | 12.93  | 0.48   |      |
| 3 | 5  | -5 | 13.59  | 0.61   |      |
| 3 | -5 | -5 | 13.01  | 0.50   |      |
| - | 3  | -5 | 5      | 12.30  | 0.47 |
| 3 | 5  | -4 | 37.17  | 1.45   |      |
| - | 3  | -5 | 4      | 47.41  | 1.51 |
| 3 | -5 | -4 | 42.44  | 1.46   |      |
| 3 | 5  | -3 | 27.93  | 1.31   |      |
| - | 3  | 5  | 3      | 32.02  | 1.12 |
| 3 | 5  | -3 | 31.70  | 1.06   |      |
| 3 | -5 | -3 | 30.89  | 1.29   |      |
| - | 3  | -5 | 3      | 31.34  | 1.10 |
| 3 | 5  | -2 | 90.00  | 3.78   |      |
| 3 | 5  | -2 | 92.74  | 3.07   |      |
| - | 3  | 5  | 2      | 91.43  | 3.22 |
| - | 3  | -5 | 2      | 90.51  | 3.23 |
| 3 | -5 | -2 | 87.64  | 3.77   |      |
| 3 | 5  | -1 | 153.09 | 5.16   |      |
| 3 | -5 | -1 | 155.67 | 6.37   |      |
| - | 3  | -5 | 1      | 148.22 | 5.54 |
| - | 3  | 5  | 0      | 16.60  | 0.69 |
| - | 3  | -5 | 0      | 19.54  | 0.69 |
| 3 | -5 | 0  | 20.44  | 0.81   |      |
| - | 3  | 5  | -1     | 0.37   | 0.08 |
| 3 | -5 | 1  | 0.08   | 0.10   |      |
| - | 3  | -5 | -1     | 0.20   | 0.03 |
| - | 3  | -5 | -1     | 0.14   | 0.08 |
| - | 3  | 5  | -2     | 45.84  | 1.60 |
| - | 3  | 5  | -2     | 40.62  | 1.53 |
| 3 | -5 | 2  | 47.69  | 1.88   |      |
| - | 3  | -5 | -2     | 46.91  | 1.51 |
| - | 3  | -5 | -2     | 41.03  | 1.60 |
| - | 3  | 5  | -3     | 3.84   | 0.21 |
| - | 3  | 5  | -3     | 4.14   | 0.22 |
| - | 3  | -5 | -3     | 4.11   | 0.18 |
| 3 | -5 | 3  | 4.11   | 0.28   |      |
| - | 3  | -5 | -3     | 4.18   | 0.22 |
| 3 | 5  | 4  | 4.70   | 0.33   |      |
| - | 3  | 5  | -4     | 5.45   | 0.27 |
| - | 3  | 5  | -4     | 5.34   | 0.26 |
| 3 | -5 | 4  | 5.38   | 0.34   |      |

|   |   |    |     |       |      |
|---|---|----|-----|-------|------|
| - | 3 | -5 | -4  | 5.29  | 0.23 |
| - | 3 | -5 | -4  | 5.37  | 0.28 |
| - | 3 | 5  | -5  | 9.29  | 0.40 |
| - | 3 | 5  | -5  | 9.35  | 0.40 |
|   | 3 | 5  | 5   | 9.38  | 0.48 |
| - | 3 | -5 | -5  | 9.36  | 0.36 |
| - | 3 | -5 | -5  | 9.10  | 0.41 |
| - | 3 | 5  | -6  | 6.07  | 0.30 |
|   | 3 | 5  | 6   | 6.01  | 0.39 |
| - | 3 | 5  | -6  | 5.55  | 0.32 |
| - | 3 | -5 | -6  | 5.40  | 0.33 |
| - | 3 | -5 | -6  | 5.40  | 0.29 |
| - | 3 | 5  | -7  | 5.38  | 0.30 |
| - | 3 | 5  | -7  | 5.22  | 0.31 |
|   | 3 | 5  | 7   | 5.65  | 0.38 |
| - | 3 | -5 | -7  | 5.60  | 0.30 |
|   | 3 | -5 | 7   | 5.54  | 0.41 |
| - | 3 | -5 | -7  | 5.58  | 0.34 |
| - | 3 | 5  | -8  | 47.65 | 1.71 |
|   | 3 | 5  | 8   | 52.22 | 2.10 |
| - | 3 | -5 | -8  | 49.01 | 1.80 |
| - | 3 | -5 | -8  | 48.56 | 1.71 |
|   | 3 | -5 | 8   | 46.93 | 2.11 |
|   | 3 | 5  | 9   | 1.66  | 0.27 |
| - | 3 | 5  | -9  | 1.45  | 0.24 |
|   | 3 | -5 | 9   | 1.32  | 0.30 |
| - | 3 | -5 | -9  | 1.22  | 0.21 |
| - | 3 | -5 | -9  | 1.18  | 0.21 |
| - | 3 | 5  | -10 | 1.07  | 0.26 |
|   | 3 | -5 | 10  | 0.73  | 0.31 |
| - | 3 | -5 | -10 | 0.37  | 0.22 |
| - | 3 | 5  | -11 | 10.31 | 0.53 |
| - | 3 | -5 | -11 | 10.01 | 0.51 |
|   | 3 | -5 | 11  | 10.13 | 0.66 |
| - | 3 | 5  | -12 | 0.14  | 0.31 |
|   | 3 | -5 | 12  | 0.69  | 0.38 |
| - | 3 | -5 | -12 | 0.21  | 0.27 |
| - | 3 | 5  | -13 | -0.05 | 0.33 |
| - | 3 | -5 | -13 | 0.01  | 0.30 |
|   | 3 | -5 | 13  | 0.19  | 0.40 |
| - | 3 | -6 | 15  | 2.87  | 0.46 |
|   | 3 | 6  | -14 | 3.09  | 0.39 |
| - | 3 | -6 | 14  | 2.75  | 0.41 |
|   | 3 | -6 | -14 | 2.41  | 0.37 |
|   | 3 | 6  | -13 | 5.56  | 0.48 |
| - | 3 | -6 | 13  | 4.71  | 0.53 |
|   | 3 | -6 | -13 | 4.95  | 0.41 |
|   | 3 | 6  | -12 | 12.82 | 0.62 |
| - | 3 | -6 | 12  | 12.85 | 0.72 |
|   | 3 | -6 | -12 | 12.21 | 0.61 |
|   | 3 | 6  | -11 | 0.08  | 0.23 |
| - | 3 | -6 | 11  | 0.05  | 0.28 |
|   | 3 | -6 | -11 | -0.03 | 0.25 |
|   | 3 | 6  | -10 | 11.39 | 0.54 |

|   |    |     |        |        |      |
|---|----|-----|--------|--------|------|
| 3 | 6  | -10 | 11.73  | 0.63   |      |
| 3 | -6 | -10 | 11.16  | 0.55   |      |
| 3 | 6  | -9  | 7.21   | 0.38   |      |
| 3 | 6  | -9  | 7.60   | 0.48   |      |
| 3 | -6 | -9  | 7.57   | 0.37   |      |
| 3 | -6 | -9  | 7.35   | 0.42   |      |
| 3 | 6  | -8  | 2.59   | 0.34   |      |
| 3 | 6  | -8  | 2.83   | 0.27   |      |
| 3 | -6 | -8  | 3.53   | 0.27   |      |
| 3 | -6 | -8  | 2.20   | 0.22   |      |
| 3 | 6  | -7  | 0.11   | 0.14   |      |
| 3 | 6  | -7  | 0.06   | 0.17   |      |
| 3 | -6 | -7  | -0.08  | 0.17   |      |
| 3 | 6  | -6  | 1.32   | 0.19   |      |
| 3 | 6  | -6  | 1.28   | 0.14   |      |
| 3 | -6 | -6  | 1.40   | 0.15   |      |
| 3 | 6  | -5  | 69.21  | 2.34   |      |
| - | 3  | -6  | 5      | 66.48  | 2.43 |
| 3 | -6 | -5  | 69.43  | 2.34   |      |
| 3 | 6  | -4  | 14.15  | 0.66   |      |
| 3 | 6  | -4  | 14.65  | 0.52   |      |
| 3 | -6 | -4  | 14.78  | 0.55   |      |
| - | 3  | -6  | 4      | 14.44  | 0.53 |
| 3 | 6  | -3  | 24.91  | 0.90   |      |
| 3 | 6  | -3  | 25.71  | 1.12   |      |
| - | 3  | 6   | 3      | 26.53  | 0.95 |
| 3 | -6 | -3  | 26.75  | 0.91   |      |
| - | 3  | -6  | 3      | 25.67  | 0.93 |
| - | 3  | 6   | 2      | 6.55   | 0.29 |
| 3 | 6  | -2  | 6.64   | 0.24   |      |
| 3 | 6  | -2  | 6.53   | 0.34   |      |
| - | 3  | -6  | 2      | 6.42   | 0.27 |
| 3 | -6 | -2  | 6.18   | 0.29   |      |
| 3 | -6 | -2  | 6.14   | 0.30   |      |
| 3 | 6  | -1  | 54.89  | 2.33   |      |
| 3 | -6 | -1  | 55.24  | 2.32   |      |
| - | 3  | -6  | 1      | 56.05  | 1.98 |
| - | 3  | 6   | 0      | 49.33  | 1.77 |
| 3 | 6  | 0   | 45.85  | 2.07   |      |
| - | 3  | -6  | 0      | 49.95  | 1.67 |
| 3 | -6 | 0   | 50.84  | 2.07   |      |
| - | 3  | -6  | 0      | 50.38  | 1.77 |
| - | 3  | 6   | -1     | 109.76 | 3.97 |
| - | 3  | -6  | -1     | 113.23 | 3.97 |
| 3 | -6 | 1   | 114.07 | 4.65   |      |
| - | 3  | -6  | -1     | 108.78 | 3.77 |
| 3 | 6  | 2   | 3.79   | 0.26   |      |
| - | 3  | 6   | -2     | 3.73   | 0.21 |
| 3 | -6 | 2   | 3.61   | 0.25   |      |
| - | 3  | -6  | -2     | 3.60   | 0.16 |
| - | 3  | 6   | -3     | 45.87  | 1.67 |
| 3 | 6  | 3   | 43.78  | 1.97   |      |
| - | 3  | -6  | -3     | 47.06  | 1.58 |
| - | 3  | -6  | -3     | 46.49  | 1.67 |

|   |    |     |       |       |
|---|----|-----|-------|-------|
| 3 | -6 | 3   | 48.00 | 1.96  |
| 3 | 6  | 4   | 0.91  | 0.16  |
| - | 3  | 6   | -4    | 0.92  |
| 3 | -6 | 4   | 0.96  | 0.16  |
| - | 3  | -6  | -4    | 0.99  |
| - | 3  | -6  | -4    | 1.49  |
| 3 | 6  | 5   | 32.21 | 1.32  |
| - | 3  | 6   | -5    | 29.22 |
| - | 3  | -6  | -5    | 29.65 |
| - | 3  | -6  | -5    | 30.42 |
| - | 3  | 6   | -6    | 23.22 |
| - | 3  | 6   | -6    | 21.68 |
| 3 | 6  | 6   | 26.01 | 1.05  |
| - | 3  | -6  | -6    | 23.40 |
| - | 3  | -6  | -6    | 22.79 |
| 3 | 6  | 7   | 1.97  | 0.24  |
| - | 3  | 6   | -7    | 2.17  |
| - | 3  | 6   | -7    | 1.38  |
| - | 3  | -6  | -7    | 1.45  |
| - | 3  | -6  | -7    | 1.41  |
| 3 | -6 | 7   | 1.54  | 0.26  |
| 3 | 6  | 8   | 16.71 | 0.73  |
| - | 3  | 6   | -8    | 13.81 |
| - | 3  | -6  | -8    | 13.71 |
| - | 3  | -6  | -8    | 13.35 |
| 3 | -6 | 8   | 13.97 | 0.74  |
| - | 3  | 6   | -9    | 6.38  |
| 3 | -6 | 9   | 6.05  | 0.50  |
| - | 3  | -6  | -9    | 6.25  |
| - | 3  | -6  | -9    | 6.69  |
| - | 3  | 6   | -10   | 5.13  |
| - | 3  | -6  | -10   | 5.12  |
| - | 3  | -6  | -10   | 5.23  |
| 3 | -6 | 10  | 5.84  | 0.50  |
| - | 3  | 6   | -11   | 5.45  |
| 3 | -6 | 11  | 5.59  | 0.54  |
| - | 3  | -6  | -11   | 5.48  |
| - | 3  | 6   | -12   | 0.02  |
| 3 | -6 | 12  | 0.35  | 0.39  |
| - | 3  | -6  | -12   | -0.16 |
| - | 3  | 6   | -13   | -0.14 |
| 3 | -6 | 13  | 0.59  | 0.42  |
| 3 | 7  | -14 | 0.66  | 0.33  |
| - | 3  | -7  | 14    | 0.08  |
| 3 | -7 | -14 | 0.07  | 0.33  |
| 3 | 7  | -13 | 0.04  | 0.29  |
| 3 | -7 | -13 | -0.23 | 0.27  |
| - | 3  | -7  | 13    | 0.01  |
| 3 | 7  | -12 | 6.48  | 0.47  |
| 3 | -7 | -12 | 5.42  | 0.45  |
| - | 3  | -7  | 12    | 5.12  |
| 3 | 7  | -11 | 2.57  | 0.30  |
| 3 | -7 | -11 | 2.48  | 0.27  |
| - | 3  | -7  | 11    | 2.07  |

|   |    |     |       |       |      |
|---|----|-----|-------|-------|------|
| 3 | 7  | -10 | 8.72  | 0.54  |      |
| 3 | 7  | -10 | 8.28  | 0.46  |      |
| 3 | -7 | -10 | 7.65  | 0.43  |      |
| 3 | 7  | -9  | 12.24 | 0.54  |      |
| 3 | 7  | -9  | 11.91 | 0.65  |      |
| 3 | -7 | -9  | 12.57 | 0.54  |      |
| 3 | -7 | -9  | 12.21 | 0.56  |      |
| 3 | 7  | -8  | 5.49  | 0.33  |      |
| 3 | 7  | -8  | 4.96  | 0.41  |      |
| 3 | -7 | -8  | 5.23  | 0.36  |      |
| 3 | 7  | -7  | 6.72  | 0.44  |      |
| 3 | 7  | -7  | 6.91  | 0.35  |      |
| 3 | -7 | -7  | 6.68  | 0.37  |      |
| 3 | 7  | -6  | 79.29 | 2.76  |      |
| 3 | -7 | -6  | 81.89 | 2.77  |      |
| 3 | 7  | -5  | 6.08  | 0.28  |      |
| - | 3  | -7  | 5     | 5.89  | 0.24 |
| 3 | -7 | -5  | 6.33  | 0.32  |      |
| 3 | 7  | -4  | 9.03  | 0.45  |      |
| 3 | 7  | -4  | 8.63  | 0.34  |      |
| - | 3  | -7  | 4     | 8.05  | 0.33 |
| 3 | -7 | -4  | 8.47  | 0.36  |      |
| 3 | 7  | -3  | 20.08 | 0.89  |      |
| 3 | -7 | -3  | 20.32 | 0.72  |      |
| - | 3  | -7  | 3     | 20.08 | 0.74 |
| 3 | 7  | -2  | 53.10 | 2.27  |      |
| 3 | 7  | -2  | 54.10 | 1.83  |      |
| 3 | -7 | -2  | 54.53 | 2.25  |      |
| 3 | -7 | -2  | 53.72 | 1.85  |      |
| - | 3  | -7  | 2     | 53.94 | 1.93 |
| - | 3  | 7   | 1     | 26.84 | 0.99 |
| 3 | 7  | -1  | 26.82 | 1.16  |      |
| - | 3  | -7  | 1     | 27.74 | 0.99 |
| 3 | -7 | -1  | 26.80 | 0.95  |      |
| 3 | -7 | -1  | 27.02 | 1.14  |      |
| 3 | 7  | 0   | 7.51  | 0.37  |      |
| - | 3  | 7   | 0     | 7.36  | 0.33 |
| - | 3  | -7  | 0     | 7.69  | 0.32 |
| - | 3  | -7  | 0     | 7.33  | 0.27 |
| 3 | -7 | 0   | 7.44  | 0.36  |      |
| 3 | 7  | 1   | 8.42  | 0.39  |      |
| - | 3  | 7   | -1    | 7.62  | 0.33 |
| - | 3  | -7  | -1    | 7.59  | 0.33 |
| 3 | -7 | 1   | 7.48  | 0.39  |      |
| - | 3  | -7  | -1    | 7.43  | 0.28 |
| - | 3  | 7   | -2    | 54.96 | 2.03 |
| 3 | 7  | 2   | 57.34 | 2.38  |      |
| - | 3  | -7  | -2    | 55.83 | 1.91 |
| 3 | -7 | 2   | 57.49 | 2.38  |      |
| 3 | 7  | 3   | 0.13  | 0.13  |      |
| - | 3  | 7   | -3    | 0.12  | 0.11 |
| - | 3  | 7   | -3    | 0.22  | 0.10 |
| 3 | -7 | 3   | -0.02 | 0.14  |      |
| - | 3  | -7  | -3    | 0.03  | 0.12 |

|   |   |    |     |       |      |
|---|---|----|-----|-------|------|
| - | 3 | -7 | -3  | 0.38  | 0.08 |
| - | 3 | 7  | -4  | 17.88 | 0.69 |
|   | 3 | 7  | 4   | 18.03 | 0.83 |
|   | 3 | -7 | 4   | 18.29 | 0.82 |
| - | 3 | -7 | -4  | 18.24 | 0.64 |
| - | 3 | -7 | -4  | 18.31 | 0.71 |
|   | 3 | 7  | 5   | 4.74  | 0.36 |
| - | 3 | 7  | -5  | 5.15  | 0.28 |
| - | 3 | -7 | -5  | 4.64  | 0.32 |
| - | 3 | -7 | -5  | 4.83  | 0.25 |
|   | 3 | -7 | 5   | 5.10  | 0.34 |
| - | 3 | 7  | -6  | 44.25 | 1.55 |
| - | 3 | 7  | -6  | 40.98 | 1.60 |
|   | 3 | 7  | 6   | 49.05 | 1.89 |
| - | 3 | -7 | -6  | 44.73 | 1.52 |
|   | 3 | -7 | 6   | 40.48 | 1.89 |
| - | 3 | -7 | -6  | 44.91 | 1.62 |
| - | 3 | 7  | -7  | 14.66 | 0.62 |
|   | 3 | 7  | 7   | 16.98 | 0.73 |
|   | 3 | -7 | 7   | 14.74 | 0.76 |
| - | 3 | -7 | -7  | 14.63 | 0.64 |
| - | 3 | -7 | -7  | 14.33 | 0.59 |
| - | 3 | 7  | -8  | 19.65 | 0.77 |
| - | 3 | -7 | -8  | 20.34 | 0.82 |
|   | 3 | -7 | 8   | 19.95 | 0.96 |
| - | 3 | -7 | -8  | 20.65 | 0.76 |
| - | 3 | 7  | -9  | 2.31  | 0.27 |
| - | 3 | -7 | -9  | 2.19  | 0.25 |
|   | 3 | -7 | 9   | 1.78  | 0.33 |
| - | 3 | -7 | -9  | 2.20  | 0.22 |
| - | 3 | 7  | -10 | 0.20  | 0.24 |
|   | 3 | -7 | 10  | 0.10  | 0.32 |
| - | 3 | -7 | -10 | -0.07 | 0.24 |
| - | 3 | -7 | -10 | 0.10  | 0.21 |
| - | 3 | 7  | -11 | 0.66  | 0.27 |
|   | 3 | -7 | 11  | 0.93  | 0.33 |
| - | 3 | -7 | -11 | 0.38  | 0.25 |
| - | 3 | 7  | -12 | 6.93  | 0.48 |
|   | 3 | -7 | 12  | 6.87  | 0.62 |
|   | 3 | -7 | 13  | 0.45  | 0.43 |
|   | 3 | 8  | -14 | 0.73  | 0.37 |
|   | 3 | -8 | -14 | 0.19  | 0.33 |
| - | 3 | -8 | 14  | 0.41  | 0.40 |
|   | 3 | 8  | -13 | 2.32  | 0.36 |
|   | 3 | -8 | -13 | 1.55  | 0.33 |
| - | 3 | -8 | 13  | 2.11  | 0.40 |
|   | 3 | 8  | -12 | 0.36  | 0.30 |
|   | 3 | -8 | -12 | -0.29 | 0.28 |
| - | 3 | -8 | 12  | -0.20 | 0.34 |
|   | 3 | 8  | -11 | 6.53  | 0.42 |
|   | 3 | -8 | -11 | 6.45  | 0.46 |
|   | 3 | 8  | -10 | 0.35  | 0.28 |
|   | 3 | 8  | -10 | 0.08  | 0.23 |
|   | 3 | -8 | -10 | -0.16 | 0.25 |

|   |    |     |       |       |      |
|---|----|-----|-------|-------|------|
| 3 | -8 | -10 | 0.04  | 0.20  |      |
| 3 | 8  | -9  | 17.91 | 0.73  |      |
| 3 | 8  | -9  | 18.12 | 0.89  |      |
| 3 | -8 | -9  | 18.94 | 0.74  |      |
| 3 | -8 | -9  | 18.52 | 0.74  |      |
| 3 | 8  | -8  | 2.31  | 0.25  |      |
| 3 | 8  | -8  | 1.79  | 0.25  |      |
| 3 | -8 | -8  | 2.11  | 0.23  |      |
| 3 | 8  | -7  | 31.02 | 1.38  |      |
| 3 | 8  | -7  | 30.85 | 1.12  |      |
| 3 | -8 | -7  | 31.76 | 1.12  |      |
| 3 | 8  | -6  | 12.80 | 0.50  |      |
| 3 | -8 | -6  | 12.34 | 0.52  |      |
| 3 | 8  | -5  | 82.14 | 3.65  |      |
| 3 | 8  | -5  | 89.47 | 2.96  |      |
| 3 | -8 | -5  | 89.34 | 2.97  |      |
| - | 3  | -8  | 5     | 85.64 | 3.08 |
| 3 | 8  | -4  | 0.83  | 0.11  |      |
| 3 | 8  | -4  | 0.83  | 0.17  |      |
| 3 | -8 | -4  | 0.60  | 0.13  |      |
| - | 3  | -8  | 4     | 0.71  | 0.09 |
| 3 | 8  | -3  | 57.66 | 2.45  |      |
| 3 | -8 | -3  | 58.10 | 1.99  |      |
| - | 3  | -8  | 3     | 57.84 | 2.07 |
| 3 | 8  | -2  | 1.57  | 0.14  |      |
| 3 | 8  | -2  | 1.76  | 0.23  |      |
| 3 | -8 | -2  | 1.89  | 0.21  |      |
| - | 3  | -8  | 2     | 1.57  | 0.17 |
| 3 | -8 | -2  | 1.37  | 0.15  |      |
| - | 3  | 8   | 1     | 1.24  | 0.13 |
| 3 | 8  | -1  | 1.99  | 0.21  |      |
| 3 | -8 | -1  | 1.20  | 0.16  |      |
| - | 3  | -8  | 1     | 1.21  | 0.11 |
| 3 | -8 | -1  | 1.40  | 0.14  |      |
| - | 3  | 8   | 0     | 0.87  | 0.12 |
| 3 | 8  | 0   | 1.44  | 0.19  |      |
| - | 3  | -8  | 0     | 0.82  | 0.11 |
| - | 3  | -8  | 0     | 1.10  | 0.10 |
| 3 | -8 | 0   | 0.83  | 0.12  |      |
| - | 3  | 8   | -1    | 41.32 | 1.50 |
| 3 | 8  | 1   | 40.94 | 1.75  |      |
| - | 3  | -8  | -1    | 42.71 | 1.50 |
| - | 3  | -8  | -1    | 39.96 | 1.41 |
| 3 | -8 | 1   | 41.63 | 1.75  |      |
| - | 3  | 8   | -2    | 0.23  | 0.11 |
| 3 | 8  | 2   | 0.38  | 0.13  |      |
| - | 3  | -8  | -2    | 0.37  | 0.07 |
| 3 | -8 | 2   | 0.06  | 0.13  |      |
| - | 3  | 8   | -3    | 18.12 | 0.66 |
| - | 3  | 8   | -3    | 17.68 | 0.68 |
| 3 | 8  | 3   | 19.38 | 0.81  |      |
| - | 3  | -8  | -3    | 15.55 | 0.69 |
| - | 3  | -8  | -3    | 18.60 | 0.63 |
| 3 | -8 | 3   | 18.14 | 0.81  |      |

|   |    |     |       |       |
|---|----|-----|-------|-------|
| 3 | 8  | 4   | 1.98  | 0.27  |
| - | 3  | 8   | -4    | 2.11  |
| - | 3  | -8  | -4    | 1.96  |
| - | 3  | -8  | -4    | 2.29  |
| 3 | -8 | 4   | 2.09  | 0.29  |
| 3 | 8  | 5   | 83.85 | 3.23  |
| - | 3  | 8   | -5    | 71.45 |
| 3 | -8 | 5   | 73.55 | 3.22  |
| - | 3  | -8  | -5    | 76.65 |
| - | 3  | -8  | -5    | 76.45 |
| - | 3  | 8   | -6    | 0.75  |
| 3 | 8  | 6   | 0.43  | 0.19  |
| - | 3  | 8   | -6    | 0.52  |
| 3 | -8 | 6   | 0.60  | 0.21  |
| - | 3  | -8  | -6    | 0.55  |
| - | 3  | -8  | -6    | 0.54  |
| - | 3  | 8   | -7    | 0.12  |
| - | 3  | -8  | -7    | 0.05  |
| - | 3  | -8  | -7    | -0.07 |
| 3 | -8 | 7   | 0.03  | 0.25  |
| - | 3  | 8   | -8    | 2.16  |
| - | 3  | -8  | -8    | 1.89  |
| 3 | -8 | 8   | 1.84  | 0.31  |
| - | 3  | -8  | -8    | 1.79  |
| - | 3  | 8   | -9    | 0.11  |
| - | 3  | -8  | -9    | 0.13  |
| - | 3  | -8  | -9    | 0.32  |
| 3 | -8 | 9   | 0.18  | 0.30  |
| - | 3  | 8   | -10   | 0.11  |
| - | 3  | -8  | -10   | -0.13 |
| 3 | -8 | 10  | 0.18  | 0.33  |
| - | 3  | 8   | -11   | 9.84  |
| 3 | -8 | 11  | 9.09  | 0.67  |
| - | 3  | 8   | -12   | 1.10  |
| 3 | -8 | 12  | 1.08  | 0.42  |
| 3 | 9  | -14 | 0.48  | 0.39  |
| 3 | -9 | -14 | 0.60  | 0.35  |
| - | 3  | -9  | 14    | 0.17  |
| 3 | 9  | -13 | 0.47  | 0.35  |
| 3 | -9 | -13 | -0.32 | 0.31  |
| - | 3  | -9  | 13    | 0.01  |
| 3 | 9  | -12 | 8.77  | 0.56  |
| 3 | -9 | -12 | 8.04  | 0.53  |
| - | 3  | -9  | 12    | 8.64  |
| 3 | 9  | -11 | 0.18  | 0.28  |
| 3 | -9 | -11 | -0.09 | 0.27  |
| 3 | 9  | -10 | 9.35  | 0.60  |
| 3 | 9  | -10 | 9.01  | 0.47  |
| 3 | -9 | -10 | 8.98  | 0.48  |
| 3 | -9 | -10 | 9.28  | 0.51  |
| 3 | 9  | -9  | 1.24  | 0.23  |
| 3 | 9  | -9  | 1.15  | 0.29  |
| 3 | -9 | -9  | 1.11  | 0.20  |
| 3 | -9 | -9  | 0.75  | 0.24  |

|   |    |    |       |       |      |
|---|----|----|-------|-------|------|
| 3 | 9  | -8 | 1.70  | 0.21  |      |
| 3 | 9  | -8 | 1.06  | 0.27  |      |
| 3 | -9 | -8 | 1.36  | 0.23  |      |
| 3 | 9  | -7 | 1.99  | 0.20  |      |
| 3 | 9  | -7 | 2.60  | 0.37  |      |
| 3 | -9 | -7 | 2.35  | 0.23  |      |
| 3 | 9  | -6 | 17.18 | 0.86  |      |
| 3 | 9  | -6 | 19.31 | 0.69  |      |
| 3 | -9 | -6 | 18.38 | 0.69  |      |
| 3 | 9  | -5 | 4.85  | 0.27  |      |
| 3 | 9  | -5 | 5.27  | 0.35  |      |
| 3 | -9 | -5 | 4.86  | 0.32  |      |
| - | 3  | -9 | 5     | 4.86  | 0.23 |
| 3 | 9  | -4 | 4.39  | 0.23  |      |
| 3 | 9  | -4 | 4.64  | 0.32  |      |
| - | 3  | -9 | 4     | 4.70  | 0.22 |
| 3 | -9 | -4 | 4.68  | 0.29  |      |
| 3 | 9  | -3 | 6.55  | 0.28  |      |
| 3 | 9  | -3 | 6.83  | 0.37  |      |
| 3 | -9 | -3 | 6.56  | 0.31  |      |
| - | 3  | -9 | 3     | 6.51  | 0.29 |
| 3 | 9  | -2 | 50.09 | 2.16  |      |
| - | 3  | -9 | 2     | 51.65 | 1.83 |
| 3 | -9 | -2 | 52.30 | 1.76  |      |
| 3 | -9 | -2 | 49.60 | 2.13  |      |
| - | 3  | 9  | 1     | 0.55  | 0.12 |
| 3 | 9  | -1 | 0.49  | 0.14  |      |
| - | 3  | -9 | 1     | 0.44  | 0.11 |
| 3 | -9 | -1 | 0.46  | 0.13  |      |
| 3 | -9 | -1 | 0.35  | 0.11  |      |
| - | 3  | 9  | 0     | 2.11  | 0.21 |
| 3 | 9  | 0  | 2.17  | 0.22  |      |
| 3 | -9 | 0  | 1.73  | 0.20  |      |
| - | 3  | -9 | 0     | 1.80  | 0.13 |
| - | 3  | -9 | 0     | 1.86  | 0.20 |
| 3 | 9  | 1  | 11.09 | 0.51  |      |
| - | 3  | 9  | -1    | 10.69 | 0.45 |
| - | 3  | -9 | -1    | 9.87  | 0.38 |
| - | 3  | -9 | -1    | 10.71 | 0.45 |
| 3 | -9 | 1  | 10.44 | 0.50  |      |
| 3 | 9  | 2  | 32.03 | 1.31  |      |
| - | 3  | 9  | -2    | 30.81 | 1.12 |
| - | 3  | -9 | -2    | 27.71 | 1.12 |
| 3 | -9 | 2  | 31.48 | 1.31  |      |
| - | 3  | -9 | -2    | 30.05 | 1.04 |
| 3 | 9  | 3  | 0.59  | 0.14  |      |
| - | 3  | 9  | -3    | 0.35  | 0.12 |
| - | 3  | -9 | -3    | 0.52  | 0.09 |
| 3 | -9 | 3  | 0.27  | 0.17  |      |
| - | 3  | 9  | -4    | 4.06  | 0.26 |
| - | 3  | 9  | -4    | 4.65  | 0.27 |
| 3 | 9  | 4  | 4.58  | 0.32  |      |
| - | 3  | -9 | -4    | 4.65  | 0.23 |
| - | 3  | -9 | -4    | 4.16  | 0.31 |

|   |     |     |       |      |      |
|---|-----|-----|-------|------|------|
| 3 | -9  | 4   | 4.10  | 0.35 |      |
| - | 3   | 9   | -5    | 1.17 | 0.15 |
| - | 3   | 9   | -5    | 1.28 | 0.18 |
| 3 | 9   | 5   | 1.58  | 0.21 |      |
| 3 | -9  | 5   | 1.30  | 0.23 |      |
| - | 3   | -9  | -5    | 1.42 | 0.18 |
| - | 3   | -9  | -5    | 1.37 | 0.14 |
| - | 3   | 9   | -6    | 7.34 | 0.41 |
| - | 3   | 9   | -6    | 7.50 | 0.37 |
| - | 3   | -9  | -6    | 7.94 | 0.35 |
| 3 | -9  | 6   | 7.85  | 0.49 |      |
| - | 3   | -9  | -6    | 7.59 | 0.43 |
| - | 3   | 9   | -7    | 0.48 | 0.20 |
| 3 | -9  | 7   | 0.36  | 0.25 |      |
| - | 3   | -9  | -7    | 0.31 | 0.16 |
| - | 3   | -9  | -7    | 0.40 | 0.21 |
| - | 3   | 9   | -8    | 4.44 | 0.34 |
| 3 | -9  | 8   | 4.45  | 0.41 |      |
| - | 3   | -9  | -8    | 4.26 | 0.39 |
| - | 3   | 9   | -9    | 0.31 | 0.26 |
| 3 | -9  | 9   | 0.26  | 0.32 |      |
| - | 3   | -9  | -9    | 0.09 | 0.24 |
| - | 3   | 9   | -10   | 0.43 | 0.29 |
| 3 | -9  | 10  | 0.26  | 0.32 |      |
| - | 3   | -9  | -10   | 0.03 | 0.28 |
| - | 3   | 9   | -11   | 0.47 | 0.32 |
| 3 | -9  | 11  | 0.05  | 0.35 |      |
| - | 3   | 9   | -12   | 9.53 | 0.62 |
| 3 | -9  | 12  | 9.89  | 0.72 |      |
| 3 | 10  | -13 | 7.90  | 0.58 |      |
| - | 3   | -10 | 13    | 7.14 | 0.66 |
| 3 | -10 | -13 | 6.60  | 0.53 |      |
| 3 | 10  | -12 | 0.54  | 0.32 |      |
| 3 | -10 | -12 | 0.21  | 0.30 |      |
| - | 3   | -10 | 12    | 0.70 | 0.38 |
| 3 | 10  | -11 | 0.28  | 0.26 |      |
| 3 | -10 | -11 | -0.41 | 0.27 |      |
| 3 | 10  | -10 | 0.65  | 0.32 |      |
| 3 | 10  | -10 | 0.37  | 0.24 |      |
| 3 | -10 | -10 | 0.37  | 0.22 |      |
| 3 | -10 | -10 | 0.29  | 0.26 |      |
| 3 | 10  | -9  | 5.12  | 0.40 |      |
| 3 | 10  | -9  | 5.06  | 0.47 |      |
| 3 | -10 | -9  | 4.84  | 0.38 |      |
| 3 | -10 | -9  | 4.59  | 0.39 |      |
| 3 | 10  | -8  | 1.66  | 0.29 |      |
| 3 | 10  | -8  | 2.09  | 0.23 |      |
| 3 | -10 | -8  | 2.17  | 0.25 |      |
| 3 | 10  | -7  | 17.85 | 0.88 |      |
| 3 | 10  | -7  | 18.25 | 0.70 |      |
| 3 | -10 | -7  | 18.30 | 0.72 |      |
| 3 | 10  | -6  | 1.24  | 0.17 |      |
| 3 | 10  | -6  | 1.59  | 0.25 |      |
| 3 | -10 | -6  | 1.53  | 0.20 |      |

|   |     |     |       |       |      |
|---|-----|-----|-------|-------|------|
| 3 | 10  | -5  | 23.73 | 0.84  |      |
| 3 | 10  | -5  | 24.29 | 1.06  |      |
| 3 | -10 | -5  | 22.55 | 0.85  |      |
| - | 3   | -10 | 5     | 23.02 | 0.86 |
| 3 | 10  | -4  | 2.22  | 0.31  |      |
| 3 | 10  | -4  | 2.15  | 0.21  |      |
| 3 | -10 | -4  | 2.40  | 0.27  |      |
| - | 3   | -10 | 4     | 2.37  | 0.18 |
| 3 | 10  | -3  | 11.86 | 0.45  |      |
| 3 | 10  | -3  | 12.24 | 0.59  |      |
| 3 | -10 | -3  | 11.96 | 0.47  |      |
| - | 3   | -10 | 3     | 11.23 | 0.46 |
| 3 | 10  | -2  | 0.54  | 0.17  |      |
| 3 | -10 | -2  | 0.46  | 0.10  |      |
| - | 3   | -10 | 2     | 0.60  | 0.11 |
| 3 | -10 | -2  | 0.65  | 0.15  |      |
| - | 3   | 10  | 1     | 25.31 | 0.95 |
| 3 | 10  | -1  | 25.10 | 1.11  |      |
| 3 | -10 | -1  | 24.92 | 1.08  |      |
| 3 | -10 | -1  | 25.48 | 0.91  |      |
| - | 3   | -10 | 1     | 25.80 | 0.94 |
| - | 3   | 10  | 0     | 5.72  | 0.31 |
| 3 | 10  | 0   | 5.98  | 0.35  |      |
| - | 3   | -10 | 0     | 5.68  | 0.28 |
| 3 | -10 | 0   | 5.54  | 0.33  |      |
| - | 3   | -10 | 0     | 5.37  | 0.24 |
| 3 | -10 | 0   | 5.71  | 0.32  |      |
| - | 3   | 10  | -1    | 68.35 | 2.47 |
| 3 | 10  | 1   | 68.16 | 2.88  |      |
| 3 | -10 | 1   | 69.43 | 2.88  |      |
| - | 3   | -10 | -1    | 70.33 | 2.46 |
| - | 3   | -10 | -1    | 66.32 | 2.33 |
| 3 | 10  | 2   | 0.39  | 0.14  |      |
| - | 3   | 10  | -2    | 0.16  | 0.13 |
| - | 3   | -10 | -2    | -0.02 | 0.13 |
| 3 | -10 | 2   | 0.19  | 0.16  |      |
| - | 3   | -10 | -2    | 0.07  | 0.08 |
| 3 | 10  | 3   | 0.97  | 0.15  |      |
| - | 3   | 10  | -3    | 0.63  | 0.14 |
| - | 3   | -10 | -3    | 0.90  | 0.11 |
| 3 | -10 | 3   | 0.73  | 0.18  |      |
| - | 3   | 10  | -4    | 8.43  | 0.41 |
| - | 3   | 10  | -4    | 8.95  | 0.41 |
| 3 | 10  | 4   | 8.77  | 0.46  |      |
| - | 3   | -10 | -4    | 7.79  | 0.41 |
| 3 | -10 | 4   | 8.20  | 0.48  |      |
| - | 3   | -10 | -4    | 8.74  | 0.35 |
| - | 3   | 10  | -5    | 10.86 | 0.47 |
| - | 3   | 10  | -5    | 10.54 | 0.46 |
| 3 | -10 | 5   | 10.78 | 0.56  |      |
| - | 3   | -10 | -5    | 10.63 | 0.48 |
| - | 3   | -10 | -5    | 10.64 | 0.42 |
| - | 3   | 10  | -6    | 1.63  | 0.21 |
| - | 3   | 10  | -6    | 2.46  | 0.26 |

|   |   |     |     |       |      |
|---|---|-----|-----|-------|------|
| - | 3 | -10 | -6  | 1.81  | 0.23 |
|   | 3 | -10 | 6   | 1.82  | 0.28 |
| - | 3 | 10  | -7  | 0.35  | 0.23 |
| - | 3 | -10 | -7  | 0.35  | 0.22 |
|   | 3 | -10 | 7   | 0.24  | 0.25 |
| - | 3 | 10  | -8  | 0.99  | 0.23 |
|   | 3 | -10 | 8   | 1.06  | 0.29 |
| - | 3 | -10 | -8  | 1.02  | 0.25 |
| - | 3 | 10  | -9  | 19.02 | 0.80 |
|   | 3 | -10 | 9   | 20.15 | 1.00 |
| - | 3 | -10 | -9  | 20.95 | 0.85 |
| - | 3 | 10  | -10 | 0.10  | 0.29 |
|   | 3 | -10 | 10  | 0.24  | 0.33 |
| - | 3 | -10 | -10 | 0.15  | 0.27 |
| - | 3 | 10  | -11 | 1.95  | 0.32 |
|   | 3 | -10 | 11  | 2.34  | 0.43 |
| - | 3 | 10  | -12 | 1.49  | 0.36 |
|   | 3 | -10 | 12  | 1.14  | 0.41 |
|   | 3 | 11  | -13 | 1.99  | 0.39 |
|   | 3 | -11 | -13 | 1.18  | 0.34 |
| - | 3 | -11 | 13  | 1.68  | 0.44 |
|   | 3 | 11  | -12 | 9.87  | 0.60 |
|   | 3 | -11 | -12 | 9.38  | 0.56 |
| - | 3 | -11 | 12  | 8.74  | 0.64 |
|   | 3 | 11  | -11 | 0.21  | 0.30 |
|   | 3 | -11 | -11 | -0.01 | 0.28 |
| - | 3 | -11 | 11  | -0.26 | 0.32 |
|   | 3 | 11  | -10 | 5.77  | 0.52 |
|   | 3 | 11  | -10 | 5.29  | 0.40 |
|   | 3 | -11 | -10 | 4.85  | 0.44 |
|   | 3 | -11 | -10 | 5.15  | 0.43 |
|   | 3 | 11  | -9  | 0.76  | 0.25 |
|   | 3 | 11  | -9  | 0.99  | 0.31 |
|   | 3 | -11 | -9  | 0.79  | 0.25 |
|   | 3 | -11 | -9  | 0.50  | 0.22 |
|   | 3 | 11  | -8  | 10.82 | 0.62 |
|   | 3 | 11  | -8  | 11.50 | 0.52 |
|   | 3 | -11 | -8  | 11.40 | 0.53 |
|   | 3 | 11  | -7  | 4.36  | 0.31 |
|   | 3 | 11  | -7  | 4.36  | 0.43 |
|   | 3 | -11 | -7  | 4.02  | 0.36 |
|   | 3 | 11  | -6  | 17.27 | 0.67 |
|   | 3 | 11  | -6  | 17.43 | 0.85 |
|   | 3 | -11 | -6  | 17.55 | 0.69 |
|   | 3 | 11  | -5  | 5.16  | 0.28 |
|   | 3 | 11  | -5  | 5.32  | 0.41 |
| - | 3 | -11 | 5   | 4.62  | 0.26 |
|   | 3 | -11 | -5  | 4.76  | 0.34 |
|   | 3 | 11  | -4  | 2.02  | 0.19 |
|   | 3 | 11  | -4  | 1.98  | 0.24 |
| - | 3 | -11 | 4   | 1.82  | 0.19 |
|   | 3 | -11 | -4  | 1.85  | 0.20 |
|   | 3 | 11  | -3  | 30.68 | 1.32 |
| - | 3 | -11 | 3   | 29.93 | 1.10 |

|   |     |     |       |       |      |
|---|-----|-----|-------|-------|------|
| 3 | -11 | -3  | 29.32 | 1.07  |      |
| 3 | 11  | -2  | 45.84 | 1.99  |      |
| 3 | -11 | -2  | 45.38 | 1.95  |      |
| - | 3   | -11 | 2     | 47.29 | 1.69 |
| 3 | -11 | -2  | 47.58 | 1.62  |      |
| 3 | 11  | -1  | 15.00 | 0.69  |      |
| - | 3   | -11 | 1     | 14.67 | 0.54 |
| 3 | -11 | -1  | 15.29 | 0.58  |      |
| - | 3   | -11 | 1     | 15.24 | 0.59 |
| 3 | -11 | -1  | 14.46 | 0.66  |      |
| 3 | 11  | 0   | 0.77  | 0.16  |      |
| - | 3   | 11  | 0     | 0.53  | 0.14 |
| 3 | -11 | 0   | 0.50  | 0.14  |      |
| 3 | -11 | 0   | 0.38  | 0.17  |      |
| - | 3   | -11 | 0     | 0.61  | 0.09 |
| - | 3   | -11 | 0     | 0.53  | 0.14 |
| 3 | 11  | 1   | 2.33  | 0.23  |      |
| - | 3   | 11  | -1    | 1.62  | 0.18 |
| - | 3   | -11 | -1    | 2.17  | 0.16 |
| 3 | -11 | 1   | 1.93  | 0.23  |      |
| - | 3   | -11 | -1    | 1.48  | 0.18 |
| 3 | 11  | 2   | 21.68 | 0.97  |      |
| - | 3   | 11  | -2    | 21.69 | 0.85 |
| - | 3   | -11 | -2    | 21.79 | 0.77 |
| 3 | -11 | 2   | 22.23 | 0.98  |      |
| - | 3   | -11 | -2    | 22.96 | 0.86 |
| 3 | 11  | 3   | 24.21 | 1.06  |      |
| - | 3   | 11  | -3    | 24.87 | 0.92 |
| - | 3   | -11 | -3    | 22.42 | 0.92 |
| 3 | -11 | 3   | 24.87 | 1.07  |      |
| - | 3   | 11  | -4    | 0.79  | 0.16 |
| - | 3   | -11 | -4    | 0.52  | 0.18 |
| 3 | -11 | 4   | 0.47  | 0.20  |      |
| - | 3   | 11  | -5    | 0.44  | 0.16 |
| - | 3   | 11  | -5    | 0.24  | 0.20 |
| - | 3   | -11 | -5    | 0.34  | 0.18 |
| 3 | -11 | 5   | 0.34  | 0.24  |      |
| - | 3   | 11  | -6    | 5.81  | 0.38 |
| - | 3   | -11 | -6    | 5.46  | 0.40 |
| 3 | -11 | 6   | 5.76  | 0.45  |      |
| - | 3   | 11  | -7    | 3.21  | 0.35 |
| - | 3   | -11 | -7    | 3.48  | 0.34 |
| 3 | -11 | 7   | 3.51  | 0.42  |      |
| - | 3   | 11  | -8    | 6.77  | 0.45 |
| - | 3   | -11 | -8    | 7.12  | 0.47 |
| 3 | -11 | 8   | 6.61  | 0.54  |      |
| - | 3   | 11  | -9    | 0.59  | 0.26 |
| 3 | -11 | 9   | 0.48  | 0.36  |      |
| - | 3   | -11 | -9    | 0.60  | 0.27 |
| - | 3   | 11  | -10   | -0.01 | 0.30 |
| 3 | -11 | 10  | 0.55  | 0.38  |      |
| - | 3   | -11 | -10   | -0.10 | 0.29 |
| - | 3   | 11  | -11   | 0.77  | 0.34 |
| - | 3   | -11 | -11   | 0.74  | 0.32 |

|   |     |     |       |            |
|---|-----|-----|-------|------------|
| 3 | -11 | 11  | 0.79  | 0.42       |
| 3 | 12  | -13 | 1.48  | 0.39       |
| 3 | -12 | -13 | 0.75  | 0.33       |
| 3 | 12  | -12 | 0.64  | 0.34       |
| - | 3   | -12 | 12    | -0.06 0.41 |
| 3 | -12 | -12 | 0.03  | 0.31       |
| 3 | 12  | -11 | 0.92  | 0.31       |
| 3 | -12 | -11 | 0.64  | 0.30       |
| - | 3   | -12 | 11    | 0.32 0.38  |
| 3 | 12  | -10 | 1.65  | 0.35       |
| 3 | 12  | -10 | 1.35  | 0.28       |
| 3 | -12 | -10 | 1.00  | 0.29       |
| 3 | -12 | -10 | 1.22  | 0.26       |
| 3 | 12  | -9  | 11.15 | 0.54       |
| 3 | 12  | -9  | 10.57 | 0.66       |
| 3 | -12 | -9  | 10.06 | 0.55       |
| 3 | -12 | -9  | 11.04 | 0.55       |
| 3 | 12  | -8  | 3.48  | 0.35       |
| 3 | 12  | -8  | 3.88  | 0.45       |
| 3 | -12 | -8  | 3.67  | 0.37       |
| 3 | -12 | -8  | 3.37  | 0.36       |
| 3 | 12  | -7  | 2.16  | 0.23       |
| 3 | 12  | -7  | 1.72  | 0.30       |
| 3 | -12 | -7  | 2.06  | 0.24       |
| 3 | 12  | -6  | 2.75  | 0.29       |
| 3 | 12  | -6  | 2.43  | 0.30       |
| 3 | -12 | -6  | 2.04  | 0.22       |
| 3 | 12  | -5  | 1.07  | 0.17       |
| 3 | 12  | -5  | 1.09  | 0.25       |
| 3 | -12 | -5  | 0.90  | 0.20       |
| 3 | 12  | -4  | 6.81  | 0.45       |
| 3 | 12  | -4  | 6.66  | 0.33       |
| - | 3   | -12 | 4     | 6.55 0.33  |
| 3 | -12 | -4  | 6.90  | 0.38       |
| 3 | 12  | -3  | 10.30 | 0.55       |
| - | 3   | -12 | 3     | 10.25 0.44 |
| 3 | -12 | -3  | 10.36 | 0.46       |
| 3 | 12  | -2  | 0.22  | 0.18       |
| 3 | -12 | -2  | 0.14  | 0.17       |
| - | 3   | -12 | 2     | 0.04 0.13  |
| 3 | 12  | -1  | 6.33  | 0.40       |
| 3 | -12 | -1  | 5.70  | 0.32       |
| 3 | -12 | -1  | 6.16  | 0.33       |
| - | 3   | -12 | 1     | 5.81 0.28  |
| - | 3   | -12 | 1     | 5.91 0.30  |
| 3 | 12  | 0   | 0.35  | 0.16       |
| - | 3   | -12 | 0     | 0.32 0.15  |
| 3 | -12 | 0   | -0.10 | 0.17       |
| - | 3   | -12 | 0     | 0.31 0.10  |
| 3 | 12  | 1   | 0.26  | 0.15       |
| - | 3   | 12  | -1    | 0.15 0.14  |
| 3 | -12 | 1   | 0.24  | 0.17       |
| - | 3   | -12 | -1    | 0.25 0.16  |
| - | 3   | 12  | -2    | 23.54 0.91 |

|   |     |     |       |       |      |
|---|-----|-----|-------|-------|------|
| 3 | 12  | 2   | 22.45 | 1.04  |      |
| - | 3   | -12 | -2    | 24.90 | 0.92 |
| 3 | -12 | 2   | 23.48 | 1.04  |      |
| 3 | 12  | 3   | 12.74 | 0.61  |      |
| - | 3   | 12  | -3    | 13.09 | 0.55 |
| - | 3   | -12 | -3    | 12.93 | 0.58 |
| 3 | -12 | 3   | 13.07 | 0.66  |      |
| - | 3   | 12  | -4    | 0.32  | 0.17 |
| 3 | -12 | 4   | 0.07  | 0.22  |      |
| - | 3   | -12 | -4    | -0.11 | 0.19 |
| - | 3   | 12  | -5    | 25.03 | 0.94 |
| - | 3   | 12  | -5    | 23.96 | 0.96 |
| - | 3   | -12 | -5    | 25.75 | 0.99 |
| 3 | -12 | 5   | 25.65 | 1.14  |      |
| - | 3   | 12  | -6    | 0.86  | 0.24 |
| - | 3   | -12 | -6    | 1.05  | 0.24 |
| 3 | -12 | 6   | 1.23  | 0.29  |      |
| - | 3   | 12  | -7    | 0.07  | 0.22 |
| - | 3   | -12 | -7    | -0.09 | 0.22 |
| 3 | -12 | 7   | 0.28  | 0.28  |      |
| - | 3   | 12  | -8    | 0.28  | 0.26 |
| 3 | -12 | 8   | 0.32  | 0.30  |      |
| - | 3   | -12 | -8    | 0.20  | 0.26 |
| - | 3   | 12  | -9    | 2.43  | 0.30 |
| 3 | -12 | 9   | 2.41  | 0.40  |      |
| - | 3   | -12 | -9    | 2.38  | 0.29 |
| - | 3   | 12  | -10   | 1.52  | 0.33 |
| - | 3   | -12 | -10   | 1.23  | 0.32 |
| 3 | -12 | 10  | 1.32  | 0.41  |      |
| - | 3   | 12  | -11   | 3.51  | 0.40 |
| - | 3   | -12 | -11   | 3.38  | 0.38 |
| 3 | -12 | 11  | 3.53  | 0.49  |      |
| 3 | -13 | -13 | 0.66  | 0.34  |      |
| 3 | 13  | -12 | 7.11  | 0.57  |      |
| 3 | -13 | -12 | 6.33  | 0.51  |      |
| - | 3   | -13 | 12    | 6.59  | 0.66 |
| 3 | 13  | -11 | 0.54  | 0.32  |      |
| 3 | -13 | -11 | 0.29  | 0.30  |      |
| - | 3   | -13 | 11    | -0.08 | 0.40 |
| 3 | 13  | -10 | 2.82  | 0.40  |      |
| 3 | 13  | -10 | 2.74  | 0.32  |      |
| 3 | -13 | -10 | 2.23  | 0.30  |      |
| 3 | -13 | -10 | 2.56  | 0.31  |      |
| 3 | 13  | -9  | 0.81  | 0.33  |      |
| 3 | 13  | -9  | 1.05  | 0.27  |      |
| 3 | -13 | -9  | 0.86  | 0.25  |      |
| 3 | -13 | -9  | 0.60  | 0.27  |      |
| 3 | 13  | -8  | 0.30  | 0.23  |      |
| 3 | 13  | -8  | 0.22  | 0.28  |      |
| 3 | -13 | -8  | 0.25  | 0.22  |      |
| 3 | -13 | -8  | 0.25  | 0.22  |      |
| 3 | 13  | -7  | 4.59  | 0.34  |      |
| 3 | 13  | -7  | 4.37  | 0.47  |      |
| 3 | -13 | -7  | 4.56  | 0.39  |      |

|   |     |     |       |       |      |
|---|-----|-----|-------|-------|------|
| 3 | 13  | -6  | 1.52  | 0.30  |      |
| 3 | 13  | -6  | 1.51  | 0.20  |      |
| 3 | -13 | -6  | 1.30  | 0.23  |      |
| 3 | 13  | -5  | 0.47  | 0.25  |      |
| 3 | 13  | -5  | 0.15  | 0.17  |      |
| 3 | -13 | -5  | 0.44  | 0.20  |      |
| 3 | 13  | -4  | 12.89 | 0.67  |      |
| - | 3   | -13 | 4     | 12.94 | 0.53 |
| 3 | -13 | -4  | 12.88 | 0.55  |      |
| 3 | 13  | -3  | 0.44  | 0.22  |      |
| 3 | -13 | -3  | 0.64  | 0.19  |      |
| - | 3   | -13 | 3     | 0.26  | 0.15 |
| 3 | 13  | -2  | 21.60 | 0.99  |      |
| - | 3   | -13 | 2     | 21.74 | 0.85 |
| 3 | -13 | -2  | 22.30 | 0.83  |      |
| 3 | 13  | -1  | 1.33  | 0.21  |      |
| - | 3   | -13 | 1     | 1.09  | 0.17 |
| 3 | -13 | -1  | 1.29  | 0.20  |      |
| 3 | 13  | 0   | 4.96  | 0.34  |      |
| 3 | -13 | 0   | 5.09  | 0.34  |      |
| - | 3   | -13 | 0     | 5.11  | 0.33 |
| 3 | -13 | 0   | 5.28  | 0.35  |      |
| 3 | 13  | 1   | 4.83  | 0.35  |      |
| - | 3   | -13 | -1    | 5.07  | 0.31 |
| 3 | -13 | 1   | 4.84  | 0.33  |      |
| 3 | 13  | 2   | 16.38 | 0.78  |      |
| 3 | -13 | 2   | 16.98 | 0.79  |      |
| - | 3   | -13 | -2    | 17.63 | 0.69 |
| - | 3   | 13  | -3    | 10.67 | 0.49 |
| - | 3   | -13 | -3    | 10.61 | 0.51 |
| 3 | -13 | 3   | 10.29 | 0.56  |      |
| - | 3   | 13  | -4    | 3.51  | 0.30 |
| 3 | -13 | 4   | 3.47  | 0.37  |      |
| - | 3   | -13 | -4    | 3.77  | 0.35 |
| - | 3   | 13  | -5    | 0.15  | 0.17 |
| - | 3   | -13 | -5    | -0.20 | 0.22 |
| 3 | -13 | 5   | -0.09 | 0.26  |      |
| - | 3   | 13  | -6    | 0.15  | 0.22 |
| - | 3   | -13 | -6    | 0.22  | 0.24 |
| 3 | -13 | 6   | 0.31  | 0.29  |      |
| - | 3   | 13  | -7    | 1.14  | 0.27 |
| - | 3   | -13 | -7    | 0.91  | 0.27 |
| 3 | -13 | 7   | 1.19  | 0.30  |      |
| - | 3   | 13  | -8    | 1.11  | 0.29 |
| - | 3   | -13 | -8    | 1.16  | 0.29 |
| 3 | -13 | 8   | 1.53  | 0.36  |      |
| - | 3   | 13  | -9    | 1.18  | 0.29 |
| 3 | -13 | 9   | 1.02  | 0.39  |      |
| - | 3   | -13 | -9    | 1.07  | 0.31 |
| - | 3   | 13  | -10   | 0.30  | 0.30 |
| - | 3   | -13 | -10   | 0.18  | 0.32 |
| 3 | -13 | 10  | -0.11 | 0.42  |      |
| - | 3   | 13  | -11   | 0.77  | 0.33 |
| - | 3   | -13 | -11   | 0.63  | 0.34 |

|   |     |     |       |            |
|---|-----|-----|-------|------------|
| 3 | 14  | -12 | 0.45  | 0.37       |
| 3 | -14 | -12 | 0.38  | 0.32       |
| 3 | 14  | -11 | 0.67  | 0.34       |
| - | 3   | -14 | 11    | 0.06 0.42  |
| 3 | -14 | -11 | 0.78  | 0.31       |
| 3 | -14 | -11 | 0.60  | 0.29       |
| 3 | 14  | -10 | 1.81  | 0.32       |
| 3 | -14 | -10 | 1.62  | 0.30       |
| 3 | -14 | -10 | 1.92  | 0.31       |
| 3 | 14  | -9  | -0.02 | 0.27       |
| 3 | 14  | -9  | 0.26  | 0.34       |
| 3 | -14 | -9  | 0.02  | 0.25       |
| 3 | -14 | -9  | 0.07  | 0.27       |
| 3 | 14  | -8  | 0.64  | 0.30       |
| 3 | 14  | -8  | 0.57  | 0.24       |
| 3 | -14 | -8  | 0.19  | 0.26       |
| 3 | -14 | -8  | 0.15  | 0.24       |
| 3 | 14  | -7  | 4.48  | 0.36       |
| 3 | 14  | -7  | 5.10  | 0.49       |
| 3 | -14 | -7  | 4.66  | 0.40       |
| 3 | 14  | -6  | 1.36  | 0.28       |
| 3 | 14  | -6  | 1.40  | 0.22       |
| 3 | -14 | -6  | 1.04  | 0.24       |
| 3 | 14  | -5  | 32.73 | 1.44       |
| 3 | 14  | -5  | 31.88 | 1.15       |
| 3 | -14 | -5  | 32.13 | 1.17       |
| 3 | 14  | -4  | 12.88 | 0.68       |
| - | 3   | -14 | 4     | 13.06 0.55 |
| 3 | -14 | -4  | 13.16 | 0.55       |
| 3 | 14  | -3  | 13.06 | 0.68       |
| - | 3   | -14 | 3     | 13.37 0.55 |
| 3 | -14 | -3  | 13.32 | 0.57       |
| 3 | 14  | -2  | 0.42  | 0.21       |
| - | 3   | -14 | 2     | 0.34 0.17  |
| 3 | -14 | -2  | 0.48  | 0.20       |
| 3 | 14  | -1  | 0.04  | 0.21       |
| - | 3   | -14 | 1     | 0.03 0.16  |
| 3 | -14 | -1  | 0.01  | 0.20       |
| 3 | 14  | 0   | 25.52 | 1.14       |
| 3 | -14 | 0   | 26.44 | 0.97       |
| - | 3   | -14 | 0     | 25.71 0.99 |
| 3 | 14  | 1   | 9.75  | 0.51       |
| 3 | -14 | 1   | 9.52  | 0.51       |
| - | 3   | -14 | -1    | 9.45 0.45  |
| 3 | -14 | 1   | 9.74  | 0.49       |
| - | 3   | -14 | -2    | 20.56 0.83 |
| 3 | -14 | 2   | 20.55 | 0.94       |
| - | 3   | -14 | -3    | 2.29 0.25  |
| 3 | -14 | 3   | 3.15  | 0.37       |
| 3 | -14 | 4   | 0.42  | 0.26       |
| - | 3   | -14 | -4    | 0.26 0.22  |
| 3 | -14 | 5   | 1.10  | 0.29       |
| - | 3   | -14 | -5    | 1.17 0.25  |
| - | 3   | -14 | -6    | 1.45 0.26  |

|   |     |     |      |       |
|---|-----|-----|------|-------|
| 3 | -14 | 6   | 1.50 | 0.32  |
| - | 3   | 14  | -7   | 0.63  |
| - | 3   | -14 | -7   | 0.04  |
| 3 | -14 | 7   | 0.53 | 0.34  |
| - | 3   | 14  | -8   | 0.13  |
| - | 3   | -14 | -8   | -0.16 |
| 3 | -14 | 8   | 0.27 | 0.37  |
| - | 3   | 14  | -9   | 4.16  |
| 3 | -14 | 9   | 4.47 | 0.58  |
| - | 3   | -14 | -9   | 3.73  |
| - | 3   | 14  | -10  | 2.70  |
| - | 3   | -14 | -10  | 2.22  |
| 3 | -14 | 10  | 2.59 | 0.47  |
| - | 3   | -14 | -11  | 1.80  |
| 3 | 15  | -12 | 1.53 | 0.39  |
| 3 | -15 | -12 | 1.79 | 0.36  |
| 3 | 15  | -11 | 5.13 | 0.50  |
| 3 | -15 | -11 | 4.50 | 0.47  |
| 3 | -15 | -11 | 4.47 | 0.53  |
| - | 3   | -15 | 11   | 3.32  |
| 3 | 15  | -10 | 0.43 | 0.31  |
| 3 | -15 | -10 | 0.56 | 0.29  |
| 3 | -15 | -10 | 0.50 | 0.29  |
| 3 | 15  | -9  | 0.46 | 0.28  |
| 3 | 15  | -9  | 0.50 | 0.36  |
| 3 | -15 | -9  | 0.38 | 0.27  |
| 3 | -15 | -9  | 0.42 | 0.28  |
| 3 | 15  | -8  | 0.62 | 0.31  |
| 3 | 15  | -8  | 0.64 | 0.27  |
| 3 | -15 | -8  | 0.81 | 0.27  |
| 3 | -15 | -8  | 0.08 | 0.25  |
| 3 | 15  | -7  | 0.41 | 0.29  |
| 3 | 15  | -7  | 0.47 | 0.23  |
| 3 | -15 | -7  | 0.27 | 0.25  |
| 3 | 15  | -6  | 0.43 | 0.30  |
| 3 | -15 | -6  | 0.45 | 0.24  |
| 3 | 15  | -5  | 1.52 | 0.30  |
| 3 | -15 | -5  | 1.22 | 0.24  |
| 3 | 15  | -4  | 3.11 | 0.40  |
| 3 | -15 | -4  | 3.70 | 0.35  |
| - | 3   | -15 | 4    | 3.73  |
| 3 | 15  | -3  | 8.25 | 0.51  |
| 3 | -15 | -3  | 8.57 | 0.45  |
| - | 3   | -15 | 3    | 7.91  |
| 3 | 15  | -2  | 0.22 | 0.23  |
| 3 | -15 | -2  | 0.40 | 0.21  |
| - | 3   | -15 | 2    | 0.15  |
| 3 | 15  | -1  | 4.89 | 0.40  |
| - | 3   | -15 | 1    | 4.63  |
| 3 | -15 | -1  | 4.50 | 0.36  |
| 3 | 15  | 0   | 1.31 | 0.21  |
| 3 | -15 | 0   | 0.89 | 0.23  |
| - | 3   | -15 | 0    | 1.18  |
| 3 | -15 | 1   | 0.08 | 0.20  |

|   |     |     |       |       |      |
|---|-----|-----|-------|-------|------|
| 3 | -15 | 1   | 0.14  | 0.23  |      |
| - | 3   | -15 | -1    | 0.40  | 0.21 |
| 3 | -15 | 2   | 0.14  | 0.22  |      |
| - | 3   | -15 | -2    | 0.06  | 0.20 |
| 3 | -15 | 3   | 0.30  | 0.26  |      |
| - | 3   | -15 | -3    | -0.02 | 0.22 |
| 3 | -15 | 4   | 1.52  | 0.29  |      |
| - | 3   | -15 | -4    | 1.52  | 0.24 |
| - | 3   | -15 | -5    | 0.20  | 0.24 |
| 3 | -15 | 5   | 0.10  | 0.29  |      |
| 3 | -15 | 6   | 0.73  | 0.33  |      |
| - | 3   | -15 | -6    | 0.46  | 0.24 |
| - | 3   | -15 | -7    | 5.51  | 0.43 |
| 3 | -15 | 7   | 5.98  | 0.50  |      |
| - | 3   | -15 | -8    | 0.73  | 0.31 |
| 3 | -15 | 8   | 0.57  | 0.39  |      |
| - | 3   | 15  | -9    | 0.58  | 0.33 |
| - | 3   | -15 | -9    | 0.24  | 0.29 |
| 3 | -15 | 9   | 0.84  | 0.43  |      |
| - | 3   | 15  | -10   | 0.46  | 0.36 |
| - | 3   | -15 | -10   | 0.46  | 0.34 |
| 3 | -16 | -11 | 0.60  | 0.32  |      |
| 3 | -16 | -11 | 0.26  | 0.32  |      |
| 3 | -16 | -10 | 1.99  | 0.34  |      |
| 3 | -16 | -10 | 2.71  | 0.34  |      |
| 3 | 16  | -9  | 1.31  | 0.39  |      |
| 3 | -16 | -9  | 1.00  | 0.29  |      |
| 3 | -16 | -9  | 1.26  | 0.30  |      |
| 3 | 16  | -8  | 4.46  | 0.53  |      |
| 3 | -16 | -8  | 4.47  | 0.44  |      |
| 3 | -16 | -8  | 4.11  | 0.43  |      |
| 3 | 16  | -7  | 0.19  | 0.33  |      |
| 3 | -16 | -7  | 0.33  | 0.26  |      |
| 3 | 16  | -6  | 1.47  | 0.33  |      |
| 3 | -16 | -6  | 1.66  | 0.27  |      |
| 3 | 16  | -5  | 0.63  | 0.29  |      |
| 3 | -16 | -5  | 0.44  | 0.24  |      |
| 3 | 16  | -4  | 7.36  | 0.52  |      |
| 3 | -16 | -4  | 7.56  | 0.44  |      |
| 3 | 16  | -3  | -0.04 | 0.25  |      |
| 3 | -16 | -3  | 0.13  | 0.22  |      |
| - | 3   | -16 | 3     | 0.23  | 0.19 |
| 3 | 16  | -2  | 2.85  | 0.37  |      |
| 3 | -16 | -2  | 3.17  | 0.35  |      |
| - | 3   | -16 | 2     | 2.93  | 0.35 |
| 3 | 16  | -1  | 10.51 | 0.60  |      |
| 3 | -16 | -1  | 10.38 | 0.49  |      |
| - | 3   | -16 | 1     | 10.79 | 0.51 |
| - | 3   | -16 | 0     | 6.19  | 0.40 |
| 3 | -16 | 0   | 6.21  | 0.42  |      |
| 3 | -16 | 1   | -0.06 | 0.21  |      |
| - | 3   | -16 | -1    | 0.03  | 0.22 |
| 3 | -16 | 2   | 1.15  | 0.26  |      |
| - | 3   | -16 | -2    | 1.27  | 0.25 |

|   |     |     |       |       |      |
|---|-----|-----|-------|-------|------|
| 3 | -16 | 3   | 1.71  | 0.29  |      |
| - | 3   | -16 | -3    | 1.56  | 0.26 |
| - | 3   | -16 | -4    | 1.47  | 0.26 |
| 3 | -16 | 4   | 1.50  | 0.30  |      |
| 3 | -16 | 5   | 1.51  | 0.33  |      |
| - | 3   | -16 | -5    | 1.67  | 0.28 |
| - | 3   | -16 | -6    | 2.65  | 0.31 |
| 3 | -16 | 6   | 3.52  | 0.49  |      |
| 3 | -16 | 7   | 0.20  | 0.37  |      |
| - | 3   | -16 | -7    | -0.02 | 0.29 |
| 3 | -16 | 8   | 0.14  | 0.41  |      |
| - | 3   | -16 | -8    | 0.00  | 0.31 |
| - | 3   | -16 | -9    | 0.08  | 0.33 |
| 3 | -16 | 9   | 0.33  | 0.45  |      |
| 3 | -17 | -10 | 0.59  | 0.31  |      |
| - | 3   | -17 | 10    | -0.06 | 0.44 |
| 3 | -17 | -10 | 0.33  | 0.32  |      |
| 3 | -17 | -9  | 0.06  | 0.30  |      |
| 3 | -17 | -9  | -0.02 | 0.30  |      |
| 3 | 17  | -8  | 0.42  | 0.37  |      |
| 3 | -17 | -8  | 0.71  | 0.29  |      |
| 3 | -17 | -8  | 0.37  | 0.29  |      |
| 3 | 17  | -7  | 2.23  | 0.38  |      |
| 3 | -17 | -7  | 2.24  | 0.29  |      |
| 3 | -17 | -7  | 1.52  | 0.27  |      |
| 3 | 17  | -6  | 1.40  | 0.35  |      |
| 3 | -17 | -6  | 1.63  | 0.28  |      |
| 3 | 17  | -5  | 0.60  | 0.31  |      |
| 3 | -17 | -5  | 0.91  | 0.26  |      |
| 3 | 17  | -4  | 1.10  | 0.30  |      |
| 3 | -17 | -4  | 1.34  | 0.26  |      |
| 3 | 17  | -3  | 1.27  | 0.28  |      |
| - | 3   | -17 | 3     | 1.45  | 0.22 |
| 3 | -17 | -3  | 1.44  | 0.26  |      |
| 3 | 17  | -2  | 0.22  | 0.25  |      |
| - | 3   | -17 | 2     | -0.11 | 0.21 |
| 3 | -17 | -2  | 0.41  | 0.24  |      |
| 3 | -17 | -1  | 2.61  | 0.28  |      |
| - | 3   | -17 | 1     | 2.85  | 0.34 |
| 3 | -17 | 0   | 1.15  | 0.26  |      |
| - | 3   | -17 | 0     | 1.01  | 0.24 |
| 3 | -17 | 1   | 2.42  | 0.29  |      |
| - | 3   | -17 | -1    | 2.56  | 0.28 |
| - | 3   | -17 | -2    | 0.33  | 0.25 |
| 3 | -17 | 2   | -0.26 | 0.27  |      |
| - | 3   | -17 | -3    | 3.42  | 0.39 |
| 3 | -17 | 3   | 3.31  | 0.44  |      |
| - | 3   | -17 | -4    | 0.20  | 0.26 |
| 3 | -17 | 4   | 0.13  | 0.30  |      |
| 3 | -17 | 5   | 0.45  | 0.33  |      |
| - | 3   | -17 | -5    | 0.02  | 0.27 |
| - | 3   | -17 | -6    | 0.28  | 0.26 |
| 3 | -17 | 6   | 0.46  | 0.38  |      |
| 3 | -17 | 7   | 1.83  | 0.41  |      |

|   |   |     |    |       |      |
|---|---|-----|----|-------|------|
| - | 3 | -17 | -7 | 1.52  | 0.32 |
|   | 3 | -17 | 8  | 0.90  | 0.44 |
| - | 3 | -17 | -8 | 0.32  | 0.33 |
|   | 3 | -18 | -9 | 0.18  | 0.31 |
|   | 3 | 18  | -8 | 0.99  | 0.40 |
|   | 3 | -18 | -8 | 0.35  | 0.30 |
|   | 3 | -18 | -8 | 0.96  | 0.32 |
|   | 3 | 18  | -7 | 0.90  | 0.36 |
|   | 3 | -18 | -7 | 0.49  | 0.29 |
|   | 3 | -18 | -7 | 0.68  | 0.29 |
|   | 3 | 18  | -6 | 1.37  | 0.35 |
|   | 3 | -18 | -6 | 0.94  | 0.28 |
|   | 3 | 18  | -5 | 1.02  | 0.33 |
|   | 3 | -18 | -5 | 1.05  | 0.27 |
|   | 3 | 18  | -4 | 3.38  | 0.46 |
|   | 3 | -18 | -4 | 3.93  | 0.40 |
|   | 3 | 18  | -3 | 0.55  | 0.29 |
|   | 3 | -18 | -3 | 0.51  | 0.26 |
| - | 3 | -18 | 3  | 0.51  | 0.23 |
| - | 3 | -18 | 2  | 0.68  | 0.24 |
|   | 3 | -18 | -2 | 0.82  | 0.26 |
|   | 3 | -18 | -1 | 0.82  | 0.26 |
| - | 3 | -18 | 1  | 1.03  | 0.25 |
|   | 3 | -18 | 0  | 4.61  | 0.41 |
| - | 3 | -18 | 0  | 4.22  | 0.40 |
| - | 3 | -18 | -1 | 0.69  | 0.24 |
|   | 3 | -18 | 1  | 0.65  | 0.28 |
|   | 3 | -18 | 2  | 2.39  | 0.31 |
| - | 3 | -18 | -2 | 2.55  | 0.30 |
| - | 3 | -18 | -3 | 1.09  | 0.26 |
| - | 3 | -18 | -4 | 0.18  | 0.28 |
|   | 3 | -18 | 4  | 0.03  | 0.32 |
|   | 3 | -18 | 5  | 0.52  | 0.38 |
| - | 3 | -18 | -5 | -0.03 | 0.29 |
| - | 3 | -18 | -6 | 0.09  | 0.30 |
|   | 3 | -18 | 6  | 0.65  | 0.39 |
|   | 3 | -18 | 7  | 0.37  | 0.42 |
| - | 3 | -18 | -7 | 0.07  | 0.31 |
|   | 3 | -18 | 8  | 1.08  | 0.46 |
|   | 3 | -19 | -8 | 0.07  | 0.31 |
|   | 3 | 19  | -7 | 4.24  | 0.55 |
|   | 3 | -19 | -7 | 3.04  | 0.36 |
|   | 3 | -19 | -7 | 4.00  | 0.45 |
|   | 3 | 19  | -6 | 0.28  | 0.35 |
|   | 3 | -19 | -6 | 0.11  | 0.29 |
|   | 3 | -19 | -6 | -0.23 | 0.29 |
|   | 3 | 19  | -5 | 0.00  | 0.33 |
|   | 3 | -19 | -5 | 0.21  | 0.27 |
|   | 3 | 19  | -4 | 1.57  | 0.34 |
|   | 3 | -19 | -4 | 1.54  | 0.30 |
|   | 3 | -19 | -3 | 2.83  | 0.30 |
|   | 3 | -19 | -2 | 0.18  | 0.26 |
| - | 3 | -19 | 2  | 0.50  | 0.26 |
|   | 3 | -19 | -1 | 1.50  | 0.28 |

|   |   |     |    |       |      |
|---|---|-----|----|-------|------|
| - | 3 | -19 | 1  | 1.43  | 0.28 |
|   | 3 | -19 | 0  | 0.73  | 0.28 |
| - | 3 | -19 | 0  | 0.64  | 0.28 |
| - | 3 | -19 | -1 | 0.58  | 0.28 |
|   | 3 | -19 | 1  | 0.40  | 0.29 |
|   | 3 | -19 | 2  | 0.34  | 0.30 |
| - | 3 | -19 | -2 | 0.51  | 0.29 |
| - | 3 | -19 | -3 | 0.35  | 0.29 |
|   | 3 | -19 | 3  | -0.26 | 0.32 |
| - | 3 | -19 | -4 | 0.12  | 0.30 |
| - | 3 | -19 | -5 | 0.27  | 0.29 |
|   | 3 | -19 | 6  | 0.40  | 0.41 |
| - | 3 | -19 | -6 | 0.35  | 0.29 |
|   | 3 | -19 | 7  | 0.57  | 0.44 |
|   | 3 | 20  | -7 | 0.02  | 0.39 |
|   | 3 | -20 | -7 | -0.12 | 0.32 |
|   | 3 | 20  | -6 | 0.42  | 0.38 |
|   | 3 | -20 | -6 | -0.23 | 0.28 |
|   | 3 | 20  | -5 | 0.35  | 0.35 |
|   | 3 | -20 | -5 | 0.63  | 0.31 |
|   | 3 | -20 | -4 | 1.50  | 0.31 |
|   | 3 | -20 | -3 | 0.59  | 0.28 |
| - | 3 | -20 | 2  | 2.06  | 0.31 |
|   | 3 | -20 | -2 | 1.79  | 0.30 |
| - | 3 | -20 | 1  | 0.23  | 0.29 |
|   | 3 | -20 | -1 | 0.46  | 0.30 |
|   | 3 | -20 | 0  | 0.01  | 0.31 |
| - | 3 | -20 | 0  | 0.16  | 0.29 |
| - | 3 | -20 | -1 | 0.60  | 0.30 |
|   | 3 | -20 | 1  | 0.67  | 0.30 |
| - | 3 | -20 | -2 | 0.45  | 0.28 |
|   | 3 | -20 | 2  | -0.02 | 0.31 |
|   | 3 | -20 | 3  | -0.27 | 0.32 |
| - | 3 | -20 | -3 | 0.25  | 0.31 |
| - | 3 | -20 | -4 | 1.05  | 0.33 |
|   | 3 | -20 | 4  | 1.02  | 0.36 |
| - | 3 | -20 | -5 | 0.17  | 0.30 |
|   | 3 | 21  | -6 | -0.01 | 0.38 |
|   | 3 | -21 | -5 | 0.29  | 0.30 |
|   | 3 | -21 | -2 | 0.50  | 0.30 |
|   | 3 | -21 | -1 | 1.56  | 0.32 |
| - | 3 | -21 | 1  | 1.20  | 0.32 |
| - | 3 | -21 | 0  | 1.20  | 0.33 |
|   | 3 | -21 | 0  | 0.82  | 0.32 |
|   | 3 | -21 | 1  | 0.66  | 0.32 |
| - | 3 | -21 | -1 | 0.79  | 0.33 |
| - | 3 | -21 | -2 | 0.47  | 0.33 |
|   | 3 | -21 | 2  | 0.25  | 0.33 |
| - | 3 | -21 | -3 | 0.10  | 0.30 |
|   | 3 | -21 | 3  | -0.32 | 0.34 |
|   | 3 | -21 | 4  | -0.23 | 0.36 |
| - | 3 | -21 | -4 | 0.22  | 0.34 |
|   | 3 | -21 | 5  | -0.21 | 0.38 |
| - | 3 | -22 | 1  | 0.28  | 0.33 |

|   |   |     |     |        |      |
|---|---|-----|-----|--------|------|
| - | 3 | -22 | 0   | 0.49   | 0.34 |
|   | 3 | -22 | 1   | 1.97   | 0.35 |
| - | 3 | -22 | -1  | 1.97   | 0.37 |
| - | 3 | -22 | -2  | 0.61   | 0.35 |
|   | 3 | -22 | 2   | 0.61   | 0.35 |
|   | 3 | -22 | 3   | 0.71   | 0.38 |
|   | 3 | -22 | 4   | 0.24   | 0.37 |
| - | 3 | -23 | 1   | 0.36   | 0.37 |
| - | 3 | -23 | 0   | -0.03  | 0.36 |
|   | 4 | 0   | -15 | -0.77  | 0.35 |
|   | 4 | 0   | -14 | 7.90   | 0.55 |
|   | 4 | 0   | -13 | -0.18  | 0.26 |
|   | 4 | 0   | -12 | 8.69   | 0.47 |
|   | 4 | 0   | -11 | -0.11  | 0.21 |
| - | 4 | 0   | 11  | 0.08   | 0.20 |
|   | 4 | 0   | -10 | 0.90   | 0.22 |
|   | 4 | 0   | -9  | -0.38  | 0.17 |
|   | 4 | 0   | -9  | -0.10  | 0.19 |
|   | 4 | 0   | -8  | 20.65  | 0.77 |
|   | 4 | 0   | -8  | 20.37  | 0.91 |
|   | 4 | 0   | -7  | 0.01   | 0.13 |
|   | 4 | 0   | -7  | -0.06  | 0.13 |
|   | 4 | 0   | -6  | 112.41 | 3.84 |
|   | 4 | 0   | -6  | 112.99 | 4.71 |
| - | 4 | 0   | 5   | 0.02   | 0.06 |
|   | 4 | 0   | -5  | -0.05  | 0.10 |
|   | 4 | 0   | -5  | 0.02   | 0.09 |
|   | 4 | 0   | -4  | 64.96  | 2.27 |
|   | 4 | 0   | -4  | 67.87  | 2.79 |
| - | 4 | 0   | 4   | 67.00  | 2.37 |
|   | 4 | 0   | -3  | -0.08  | 0.07 |
| - | 4 | 0   | 3   | 0.16   | 0.06 |
|   | 4 | 0   | -2  | 54.66  | 1.88 |
|   | 4 | 0   | -2  | 54.47  | 2.31 |
| - | 4 | 0   | 2   | 55.93  | 1.97 |
|   | 4 | 0   | -1  | 0.24   | 0.10 |
| - | 4 | 0   | 1   | 0.15   | 0.07 |
|   | 4 | 0   | -1  | 0.11   | 0.06 |
|   | 4 | 0   | 0   | 11.30  | 0.52 |
| - | 4 | 0   | -1  | 0.45   | 0.07 |
| - | 4 | 0   | -2  | 36.80  | 1.30 |
| - | 4 | 0   | -2  | 36.02  | 1.23 |
|   | 4 | 0   | 2   | 34.61  | 1.52 |
| - | 4 | 0   | -3  | -0.04  | 0.11 |
|   | 4 | 0   | 3   | 0.12   | 0.14 |
| - | 4 | 0   | -3  | -0.08  | 0.08 |
|   | 4 | 0   | 4   | 155.29 | 6.56 |
| - | 4 | 0   | -4  | 156.82 | 5.33 |
| - | 4 | 0   | -4  | 159.14 | 5.60 |
| - | 4 | 0   | -5  | -0.09  | 0.14 |
|   | 4 | 0   | 5   | 0.17   | 0.18 |
| - | 4 | 0   | -5  | 0.17   | 0.12 |
|   | 4 | 0   | 6   | 66.52  | 2.83 |
| - | 4 | 0   | -6  | 68.04  | 2.42 |

|   |   |    |     |       |      |
|---|---|----|-----|-------|------|
| - | 4 | 0  | -6  | 65.95 | 2.29 |
|   | 4 | 0  | 7   | -0.09 | 0.22 |
| - | 4 | 0  | -7  | 0.17  | 0.16 |
| - | 4 | 0  | -7  | -0.31 | 0.17 |
|   | 4 | 0  | 8   | 4.94  | 0.38 |
| - | 4 | 0  | -8  | 5.16  | 0.39 |
| - | 4 | 0  | -8  | 4.93  | 0.33 |
| - | 4 | 0  | -9  | -0.04 | 0.20 |
|   | 4 | 0  | 9   | -0.04 | 0.27 |
| - | 4 | 0  | -10 | 23.99 | 0.93 |
|   | 4 | 0  | 10  | 24.41 | 1.14 |
|   | 4 | 0  | 11  | 0.13  | 0.33 |
| - | 4 | 0  | -11 | -0.01 | 0.26 |
|   | 4 | 0  | 12  | 0.47  | 0.36 |
| - | 4 | 0  | -12 | 0.36  | 0.29 |
| - | 4 | 0  | -13 | -0.16 | 0.32 |
|   | 4 | 1  | -15 | -0.01 | 0.37 |
|   | 4 | -1 | -15 | -0.44 | 0.36 |
|   | 4 | 1  | -14 | 0.47  | 0.30 |
|   | 4 | -1 | -14 | 0.59  | 0.33 |
|   | 4 | 1  | -13 | 15.14 | 0.71 |
|   | 4 | -1 | -13 | 15.18 | 0.71 |
|   | 4 | 1  | -12 | 0.34  | 0.24 |
|   | 4 | -1 | -12 | 0.31  | 0.25 |
| - | 4 | -1 | 12  | 0.72  | 0.26 |
|   | 4 | 1  | -11 | 8.09  | 0.46 |
| - | 4 | -1 | 11  | 7.83  | 0.48 |
|   | 4 | -1 | -11 | 7.71  | 0.46 |
|   | 4 | 1  | -10 | 10.04 | 0.49 |
|   | 4 | 1  | -10 | 10.07 | 0.53 |
| - | 4 | 1  | 10  | 10.20 | 0.53 |
|   | 4 | -1 | -10 | 10.07 | 0.50 |
|   | 4 | 1  | -9  | 6.82  | 0.41 |
|   | 4 | 1  | -9  | 6.92  | 0.38 |
|   | 4 | -1 | -9  | 6.82  | 0.36 |
|   | 4 | -1 | -9  | 6.38  | 0.38 |
|   | 4 | 1  | -8  | 4.99  | 0.33 |
|   | 4 | 1  | -8  | 5.38  | 0.30 |
|   | 4 | -1 | -8  | 5.15  | 0.33 |
|   | 4 | -1 | -8  | 4.76  | 0.30 |
|   | 4 | 1  | -7  | 36.43 | 1.32 |
|   | 4 | 1  | -7  | 38.22 | 1.61 |
|   | 4 | -1 | -7  | 38.39 | 1.33 |
|   | 4 | -1 | -7  | 37.57 | 1.60 |
|   | 4 | 1  | -6  | 2.66  | 0.23 |
|   | 4 | 1  | -6  | 2.63  | 0.19 |
|   | 4 | -1 | -6  | 2.42  | 0.20 |
|   | 4 | -1 | -6  | 2.47  | 0.21 |
|   | 4 | 1  | -5  | 23.82 | 1.03 |
| - | 4 | 1  | 5   | 24.59 | 0.86 |
|   | 4 | 1  | -5  | 24.36 | 0.84 |
| - | 4 | -1 | 5   | 23.91 | 0.86 |
|   | 4 | -1 | -5  | 23.09 | 0.84 |
|   | 4 | -1 | -5  | 23.14 | 1.02 |

|   |   |    |    |        |      |
|---|---|----|----|--------|------|
| - | 4 | 1  | 4  | 5.41   | 0.23 |
|   | 4 | 1  | -4 | 5.60   | 0.28 |
|   | 4 | -1 | -4 | 5.19   | 0.26 |
|   | 4 | -1 | -4 | 5.54   | 0.28 |
| - | 4 | -1 | 4  | 5.66   | 0.22 |
| - | 4 | 1  | 3  | 62.56  | 2.19 |
|   | 4 | 1  | -3 | 60.68  | 2.57 |
|   | 4 | 1  | -3 | 58.89  | 2.09 |
|   | 4 | -1 | -3 | 61.26  | 2.56 |
| - | 4 | -1 | 3  | 62.63  | 2.19 |
|   | 4 | 1  | -2 | 208.50 | 8.84 |
| - | 4 | 1  | 2  | 221.84 | 7.55 |
|   | 4 | 1  | -2 | 199.97 | 7.49 |
|   | 4 | -1 | -2 | 212.78 | 8.84 |
|   | 4 | -1 | -2 | 216.15 | 7.19 |
| - | 4 | -1 | 2  | 205.62 | 7.53 |
|   | 4 | 1  | -1 | 3.72   | 0.23 |
|   | 4 | 1  | -1 | 4.03   | 0.17 |
| - | 4 | 1  | 1  | 4.01   | 0.18 |
| - | 4 | -1 | 1  | 3.78   | 0.18 |
|   | 4 | -1 | -1 | 3.16   | 0.23 |
|   | 4 | -1 | -1 | 3.66   | 0.17 |
| - | 4 | -1 | 0  | 0.02   | 0.07 |
|   | 4 | -1 | 0  | -0.02  | 0.11 |
|   | 4 | 1  | 1  | 39.11  | 1.93 |
| - | 4 | 1  | -1 | 52.22  | 1.65 |
| - | 4 | 1  | -2 | 4.73   | 0.23 |
| - | 4 | 1  | -2 | 4.95   | 0.21 |
|   | 4 | 1  | 2  | 4.26   | 0.28 |
| - | 4 | -1 | -2 | 4.86   | 0.23 |
| - | 4 | -1 | -2 | 4.84   | 0.20 |
| - | 4 | 1  | -3 | 16.27  | 0.63 |
|   | 4 | 1  | 3  | 15.65  | 0.74 |
| - | 4 | 1  | -3 | 17.22  | 0.59 |
|   | 4 | -1 | 3  | 16.72  | 0.75 |
| - | 4 | -1 | -3 | 16.86  | 0.64 |
| - | 4 | -1 | -3 | 16.92  | 0.59 |
| - | 4 | 1  | -4 | 14.49  | 0.52 |
| - | 4 | 1  | -4 | 13.72  | 0.56 |
|   | 4 | 1  | 4  | 13.58  | 0.65 |
|   | 4 | -1 | 4  | 13.84  | 0.64 |
| - | 4 | -1 | -4 | 13.92  | 0.51 |
| - | 4 | -1 | -4 | 13.71  | 0.54 |
| - | 4 | 1  | -5 | 98.48  | 3.56 |
| - | 4 | 1  | -5 | 100.31 | 3.38 |
|   | 4 | 1  | 5  | 98.34  | 4.17 |
|   | 4 | -1 | 5  | 99.48  | 4.17 |
| - | 4 | -1 | -5 | 99.36  | 3.38 |
| - | 4 | -1 | -5 | 99.81  | 3.56 |
| - | 4 | 1  | -6 | 4.79   | 0.29 |
| - | 4 | 1  | -6 | 4.80   | 0.31 |
|   | 4 | 1  | 6  | 5.08   | 0.37 |
| - | 4 | -1 | -6 | 4.72   | 0.31 |
| - | 4 | -1 | -6 | 4.81   | 0.27 |

|   |    |     |       |       |      |
|---|----|-----|-------|-------|------|
| 4 | -1 | 6   | 5.31  | 0.35  |      |
| - | 4  | 1   | -7    | 59.10 | 2.07 |
| - | 4  | 1   | -7    | 61.91 | 2.19 |
| 4 | 1  | 7   | 59.57 | 2.55  |      |
| - | 4  | -1  | -7    | 61.47 | 2.18 |
| - | 4  | -1  | -7    | 59.69 | 2.07 |
| 4 | -1 | 7   | 58.11 | 2.55  |      |
| 4 | 1  | 8   | 7.74  | 0.50  |      |
| - | 4  | 1   | -8    | 8.11  | 0.45 |
| - | 4  | 1   | -8    | 7.88  | 0.41 |
| - | 4  | -1  | -8    | 7.47  | 0.39 |
| - | 4  | -1  | -8    | 8.76  | 0.47 |
| 4 | -1 | 8   | 7.75  | 0.51  |      |
| - | 4  | 1   | -9    | 1.19  | 0.23 |
| 4 | 1  | 9   | 1.71  | 0.29  |      |
| - | 4  | -1  | -9    | 1.57  | 0.22 |
| 4 | -1 | 9   | 1.57  | 0.27  |      |
| - | 4  | -1  | -9    | 1.56  | 0.25 |
| 4 | 1  | 10  | 2.62  | 0.34  |      |
| - | 4  | 1   | -10   | 2.45  | 0.28 |
| 4 | -1 | 10  | 2.48  | 0.34  |      |
| - | 4  | -1  | -10   | 2.75  | 0.27 |
| - | 4  | 1   | -11   | 16.71 | 0.74 |
| 4 | 1  | 11  | 18.03 | 0.90  |      |
| - | 4  | -1  | -11   | 17.41 | 0.73 |
| 4 | -1 | 11  | 16.87 | 0.89  |      |
| 4 | 1  | 12  | 0.48  | 0.35  |      |
| - | 4  | 1   | -12   | -0.42 | 0.29 |
| - | 4  | -1  | -12   | 0.00  | 0.28 |
| 4 | -1 | 12  | 0.49  | 0.36  |      |
| - | 4  | 1   | -13   | -0.20 | 0.32 |
| 4 | -1 | 13  | 0.36  | 0.40  |      |
| - | 4  | -1  | -13   | -0.26 | 0.31 |
| 4 | 2  | -15 | 0.24  | 0.37  |      |
| 4 | -2 | -15 | -0.12 | 0.36  |      |
| 4 | 2  | -14 | 3.47  | 0.39  |      |
| 4 | -2 | -14 | 3.28  | 0.38  |      |
| 4 | 2  | -13 | 0.25  | 0.29  |      |
| 4 | -2 | -13 | -0.12 | 0.27  |      |
| 4 | 2  | -12 | 6.27  | 0.44  |      |
| 4 | -2 | -12 | 5.43  | 0.44  |      |
| - | 4  | -2  | 12    | 5.83  | 0.46 |
| 4 | 2  | -11 | 8.33  | 0.46  |      |
| 4 | -2 | -11 | 7.38  | 0.47  |      |
| 4 | 2  | -10 | 21.64 | 0.98  |      |
| 4 | 2  | -10 | 21.82 | 0.84  |      |
| 4 | -2 | -10 | 21.30 | 0.83  |      |
| 4 | 2  | -9  | 25.90 | 0.97  |      |
| 4 | 2  | -9  | 26.61 | 1.17  |      |
| 4 | -2 | -9  | 26.66 | 0.97  |      |
| 4 | 2  | -8  | 7.28  | 0.41  |      |
| 4 | 2  | -8  | 7.29  | 0.36  |      |
| 4 | -2 | -8  | 7.62  | 0.38  |      |
| 4 | -2 | -8  | 5.82  | 0.34  |      |

|   |    |    |        |        |
|---|----|----|--------|--------|
| 4 | 2  | -7 | 24.87  | 1.07   |
| 4 | 2  | -7 | 23.92  | 0.88   |
| 4 | -2 | -7 | 24.03  | 1.05   |
| 4 | -2 | -7 | 24.62  | 0.88   |
| 4 | 2  | -6 | 46.18  | 1.66   |
| 4 | 2  | -6 | 49.44  | 2.03   |
| 4 | -2 | -6 | 48.14  | 2.02   |
| 4 | -2 | -6 | 48.26  | 1.67   |
| - | 4  | 2  | 5      | 6.38   |
| 4 | 2  | -5 | 6.33   | 0.28   |
| 4 | 2  | -5 | 6.34   | 0.33   |
| 4 | -2 | -5 | 6.04   | 0.30   |
| - | 4  | -2 | 5      | 5.95   |
| 4 | -2 | -5 | 5.96   | 0.30   |
| 4 | 2  | -4 | 5.82   | 0.31   |
| - | 4  | 2  | 4      | 5.58   |
| 4 | -2 | -4 | 5.81   | 0.28   |
| 4 | -2 | -4 | 5.37   | 0.27   |
| - | 4  | -2 | 4      | 6.08   |
| 4 | 2  | -3 | 0.27   | 0.07   |
| - | 4  | 2  | 3      | 0.16   |
| 4 | 2  | -3 | 0.19   | 0.10   |
| - | 4  | -2 | 3      | 0.00   |
| 4 | -2 | -3 | 0.25   | 0.08   |
| 4 | -2 | -3 | 0.32   | 0.08   |
| - | 4  | 2  | 2      | 17.01  |
| 4 | 2  | -2 | 17.58  | 0.74   |
| 4 | 2  | -2 | 16.76  | 0.59   |
| 4 | -2 | -2 | 16.56  | 0.74   |
| - | 4  | -2 | 2      | 17.46  |
| 4 | 2  | -1 | 4.33   | 0.18   |
| - | 4  | 2  | 1      | 5.17   |
| - | 4  | -2 | 1      | 4.74   |
| 4 | -2 | -1 | 4.39   | 0.25   |
| 4 | -2 | -1 | 4.05   | 0.20   |
| 4 | 2  | 0  | 144.86 | 4.97   |
| 4 | -2 | 0  | 148.83 | 6.15   |
| - | 4  | -2 | 0      | 146.08 |
| - | 4  | 2  | -1     | 39.48  |
| 4 | 2  | 1  | 36.79  | 1.67   |
| 4 | -2 | 1  | 39.79  | 1.66   |
| - | 4  | -2 | -1     | 40.93  |
| - | 4  | 2  | -2     | 12.59  |
| - | 4  | 2  | -2     | 12.29  |
| 4 | 2  | 2  | 11.52  | 0.57   |
| 4 | -2 | 2  | 10.44  | 0.54   |
| - | 4  | -2 | -2     | 12.40  |
| - | 4  | -2 | -2     | 12.16  |
| - | 4  | 2  | -3     | 15.58  |
| 4 | 2  | 3  | 14.74  | 0.72   |
| - | 4  | 2  | -3     | 16.73  |
| - | 4  | -2 | -3     | 15.23  |
| - | 4  | -2 | -3     | 15.88  |
| 4 | 2  | 4  | 50.88  | 2.20   |

|   |    |     |     |       |      |
|---|----|-----|-----|-------|------|
| - | 4  | 2   | -4  | 51.66 | 1.88 |
| - | 4  | 2   | -4  | 52.81 | 1.78 |
| - | 4  | -2  | -4  | 52.28 | 1.77 |
| 4 | -2 | 4   |     | 52.16 | 2.20 |
| - | 4  | -2  | -4  | 51.52 | 1.87 |
| - | 4  | 2   | -5  | 0.95  | 0.15 |
| 4 | 2  | 5   |     | 0.91  | 0.19 |
| - | 4  | 2   | -5  | 1.03  | 0.14 |
| 4 | -2 | 5   |     | 1.00  | 0.20 |
| - | 4  | -2  | -5  | 0.95  | 0.13 |
| - | 4  | -2  | -5  | 0.87  | 0.15 |
| - | 4  | 2   | -6  | 7.41  | 0.36 |
| - | 4  | 2   | -6  | 6.99  | 0.39 |
| 4 | 2  | 6   |     | 7.27  | 0.44 |
| - | 4  | -2  | -6  | 7.39  | 0.37 |
| 4 | -2 | 6   |     | 7.61  | 0.45 |
| - | 4  | -2  | -6  | 7.56  | 0.35 |
| - | 4  | 2   | -7  | 6.56  | 0.41 |
| 4 | 2  | 7   |     | 7.60  | 0.46 |
| - | 4  | 2   | -7  | 7.12  | 0.38 |
| - | 4  | -2  | -7  | 7.52  | 0.35 |
| - | 4  | -2  | -7  | 7.15  | 0.41 |
| 4 | -2 | 7   |     | 6.99  | 0.47 |
| - | 4  | 2   | -8  | 10.01 | 0.52 |
| - | 4  | 2   | -8  | 10.18 | 0.48 |
| 4 | 2  | 8   |     | 10.76 | 0.59 |
| 4 | -2 | 8   |     | 10.21 | 0.60 |
| - | 4  | -2  | -8  | 10.57 | 0.46 |
| - | 4  | -2  | -8  | 11.40 | 0.51 |
| 4 | 2  | 9   |     | 1.07  | 0.27 |
| - | 4  | 2   | -9  | 0.80  | 0.22 |
| 4 | -2 | 9   |     | 0.99  | 0.29 |
| - | 4  | -2  | -9  | 0.74  | 0.21 |
| - | 4  | -2  | -9  | 0.93  | 0.23 |
| - | 4  | 2   | -10 | 1.51  | 0.24 |
| 4 | 2  | 10  |     | 1.80  | 0.31 |
| 4 | -2 | 10  |     | 1.88  | 0.33 |
| - | 4  | -2  | -10 | 1.51  | 0.25 |
| 4 | 2  | 11  |     | 4.00  | 0.47 |
| - | 4  | 2   | -11 | 2.81  | 0.32 |
| - | 4  | -2  | -11 | 2.71  | 0.30 |
| 4 | -2 | 11  |     | 3.59  | 0.49 |
| - | 4  | 2   | -12 | 1.30  | 0.31 |
| 4 | -2 | 12  |     | 1.58  | 0.38 |
| - | 4  | -2  | -12 | 1.69  | 0.30 |
| - | 4  | 2   | -13 | -0.20 | 0.33 |
| - | 4  | -2  | -13 | -0.57 | 0.31 |
| 4 | -2 | 13  |     | 0.22  | 0.40 |
| 4 | 3  | -15 |     | -0.23 | 0.36 |
| 4 | -3 | -15 |     | -0.24 | 0.36 |
| 4 | 3  | -14 |     | 2.84  | 0.38 |
| 4 | -3 | -14 |     | 2.74  | 0.37 |
| 4 | 3  | -13 |     | 4.40  | 0.46 |
| - | 4  | -3  | 13  | 4.71  | 0.47 |

|   |    |     |        |             |
|---|----|-----|--------|-------------|
| 4 | -3 | -13 | 4.23   | 0.41        |
| 4 | 3  | -12 | 4.14   | 0.40        |
| - | 4  | -3  | 12     | 3.97 0.44   |
| 4 | -3 | -12 | 3.73   | 0.37        |
| 4 | 3  | -11 | 5.45   | 0.41        |
| 4 | -3 | -11 | 5.18   | 0.42        |
| 4 | 3  | -10 | 0.61   | 0.22        |
| 4 | 3  | -10 | 0.59   | 0.20        |
| 4 | -3 | -10 | 0.39   | 0.23        |
| 4 | 3  | -9  | 35.44  | 1.27        |
| 4 | 3  | -9  | 35.85  | 1.54        |
| 4 | -3 | -9  | 34.96  | 1.27        |
| 4 | 3  | -8  | 8.49   | 0.47        |
| 4 | 3  | -8  | 8.44   | 0.38        |
| 4 | -3 | -8  | 8.34   | 0.42        |
| 4 | 3  | -7  | 3.38   | 0.30        |
| 4 | 3  | -7  | 3.59   | 0.25        |
| 4 | -3 | -7  | 3.14   | 0.24        |
| 4 | 3  | -6  | 0.76   | 0.15        |
| 4 | 3  | -6  | 0.76   | 0.12        |
| 4 | -3 | -6  | 0.59   | 0.15        |
| 4 | -3 | -6  | 0.57   | 0.11        |
| - | 4  | 3   | 5      | 60.55 2.10  |
| 4 | 3  | -5  | 57.12  | 2.00        |
| 4 | 3  | -5  | 60.70  | 2.47        |
| 4 | -3 | -5  | 57.83  | 2.01        |
| - | 4  | -3  | 5      | 58.19 2.08  |
| 4 | -3 | -5  | 56.83  | 2.45        |
| - | 4  | 3   | 4      | 19.67 0.71  |
| 4 | 3  | -4  | 19.71  | 0.85        |
| 4 | -3 | -4  | 18.96  | 0.83        |
| 4 | -3 | -4  | 20.50  | 0.71        |
| - | 4  | -3  | 4      | 18.24 0.70  |
| - | 4  | 3   | 3      | 206.26 7.32 |
| 4 | 3  | -3  | 207.47 | 8.60        |
| 4 | 3  | -3  | 202.71 | 6.96        |
| 4 | -3 | -3  | 199.17 | 8.55        |
| - | 4  | -3  | 3      | 199.38 7.29 |
| 4 | -3 | -3  | 212.02 | 7.00        |
| 4 | 3  | -2  | 3.21   | 0.13        |
| - | 4  | 3   | 2      | 3.59 0.17   |
| 4 | -3 | -2  | 2.57   | 0.19        |
| - | 4  | -3  | 2      | 2.88 0.15   |
| 4 | 3  | -1  | 10.47  | 0.34        |
| - | 4  | 3   | 1      | 8.80 0.37   |
| - | 4  | -3  | 1      | 9.57 0.37   |
| 4 | -3 | -1  | 9.60   | 0.45        |
| 4 | 3  | 0   | 39.97  | 1.89        |
| - | 4  | -3  | 0      | 46.21 1.61  |
| 4 | -3 | 0   | 48.29  | 1.89        |
| - | 4  | 3   | -1     | 105.36 3.59 |
| 4 | 3  | 1   | 90.60  | 4.21        |
| - | 4  | -3  | -1     | 102.12 3.41 |
| 4 | -3 | 1   | 104.22 | 4.20        |

|   |   |    |     |       |      |
|---|---|----|-----|-------|------|
| - | 4 | 3  | -2  | 86.00 | 3.04 |
|   | 4 | 3  | 2   | 81.48 | 3.57 |
| - | 4 | 3  | -2  | 86.89 | 2.89 |
| - | 4 | -3 | -2  | 83.30 | 3.04 |
|   | 4 | -3 | 2   | 87.08 | 3.56 |
| - | 4 | -3 | -2  | 85.33 | 2.88 |
|   | 4 | 3  | 3   | 18.26 | 0.86 |
| - | 4 | 3  | -3  | 19.46 | 0.68 |
| - | 4 | 3  | -3  | 19.71 | 0.73 |
| - | 4 | -3 | -3  | 19.17 | 0.72 |
| - | 4 | -3 | -3  | 19.20 | 0.67 |
| - | 4 | 3  | -4  | 34.83 | 1.31 |
|   | 4 | 3  | 4   | 35.68 | 1.54 |
| - | 4 | 3  | -4  | 36.80 | 1.25 |
| - | 4 | -3 | -4  | 35.45 | 1.31 |
| - | 4 | -3 | -4  | 36.20 | 1.23 |
| - | 4 | 3  | -5  | 14.69 | 0.60 |
| - | 4 | 3  | -5  | 15.53 | 0.56 |
|   | 4 | 3  | 5   | 15.22 | 0.70 |
| - | 4 | -3 | -5  | 14.68 | 0.58 |
| - | 4 | -3 | -5  | 15.36 | 0.54 |
|   | 4 | -3 | 5   | 13.34 | 0.68 |
|   | 4 | 3  | 6   | 2.48  | 0.24 |
| - | 4 | 3  | -6  | 2.39  | 0.23 |
| - | 4 | 3  | -6  | 2.36  | 0.20 |
| - | 4 | -3 | -6  | 2.50  | 0.23 |
| - | 4 | -3 | -6  | 2.69  | 0.27 |
|   | 4 | -3 | 6   | 2.99  | 0.33 |
| - | 4 | 3  | -7  | 34.56 | 1.34 |
|   | 4 | 3  | 7   | 36.21 | 1.57 |
| - | 4 | 3  | -7  | 37.04 | 1.28 |
|   | 4 | -3 | 7   | 35.63 | 1.57 |
| - | 4 | -3 | -7  | 36.05 | 1.27 |
| - | 4 | -3 | -7  | 37.22 | 1.34 |
| - | 4 | 3  | -8  | 0.51  | 0.20 |
|   | 4 | 3  | 8   | 1.23  | 0.24 |
| - | 4 | 3  | -8  | 1.10  | 0.21 |
| - | 4 | -3 | -8  | 0.98  | 0.18 |
| - | 4 | -3 | -8  | 0.90  | 0.20 |
|   | 4 | -3 | 8   | 0.99  | 0.28 |
| - | 4 | 3  | -9  | 2.77  | 0.30 |
|   | 4 | 3  | 9   | 3.93  | 0.44 |
| - | 4 | -3 | -9  | 2.86  | 0.33 |
| - | 4 | -3 | -9  | 3.37  | 0.40 |
|   | 4 | -3 | 9   | 3.32  | 0.43 |
|   | 4 | 3  | 10  | 2.33  | 0.32 |
| - | 4 | 3  | -10 | 1.78  | 0.27 |
| - | 4 | -3 | -10 | 1.91  | 0.25 |
|   | 4 | -3 | 10  | 2.14  | 0.34 |
| - | 4 | 3  | -11 | 9.41  | 0.54 |
|   | 4 | -3 | 11  | 9.59  | 0.63 |
| - | 4 | -3 | -11 | 9.22  | 0.51 |
| - | 4 | 3  | -12 | 1.06  | 0.32 |
|   | 4 | -3 | 12  | 1.11  | 0.38 |

|   |   |    |     |        |      |
|---|---|----|-----|--------|------|
| - | 4 | -3 | -12 | 0.94   | 0.29 |
| - | 4 | 3  | -13 | 0.04   | 0.33 |
|   | 4 | -3 | 13  | 0.51   | 0.43 |
| - | 4 | -3 | -13 | -0.06  | 0.32 |
|   | 4 | 4  | -14 | 2.36   | 0.37 |
|   | 4 | -4 | -14 | 1.90   | 0.36 |
| - | 4 | -4 | 14  | 2.48   | 0.37 |
|   | 4 | 4  | -13 | -0.02  | 0.28 |
| - | 4 | -4 | 13  | 0.15   | 0.32 |
|   | 4 | -4 | -13 | -0.33  | 0.29 |
|   | 4 | 4  | -12 | 0.01   | 0.25 |
|   | 4 | -4 | -12 | -0.26  | 0.25 |
| - | 4 | -4 | 12  | 0.14   | 0.28 |
|   | 4 | 4  | -11 | 3.60   | 0.40 |
|   | 4 | 4  | -11 | 3.67   | 0.33 |
|   | 4 | -4 | -11 | 3.15   | 0.34 |
|   | 4 | 4  | -10 | 22.94  | 0.89 |
|   | 4 | 4  | -10 | 23.91  | 1.08 |
|   | 4 | -4 | -10 | 24.22  | 0.90 |
|   | 4 | 4  | -9  | 0.57   | 0.19 |
|   | 4 | 4  | -9  | 0.76   | 0.22 |
|   | 4 | -4 | -9  | 0.56   | 0.20 |
|   | 4 | 4  | -8  | 7.51   | 0.45 |
|   | 4 | 4  | -8  | 7.27   | 0.37 |
|   | 4 | 4  | -7  | 37.03  | 1.31 |
|   | 4 | 4  | -7  | 38.68  | 1.61 |
|   | 4 | -4 | -7  | 36.01  | 1.57 |
|   | 4 | 4  | -6  | 83.34  | 3.26 |
|   | 4 | 4  | -6  | 80.13  | 2.65 |
|   | 4 | -4 | -6  | 79.08  | 3.23 |
|   | 4 | -4 | -6  | 66.97  | 2.65 |
| - | 4 | 4  | 5   | 136.53 | 4.72 |
|   | 4 | 4  | -5  | 128.30 | 4.49 |
|   | 4 | 4  | -5  | 137.33 | 5.54 |
|   | 4 | -4 | -5  | 130.11 | 4.50 |
| - | 4 | -4 | 5   | 132.39 | 4.70 |
|   | 4 | -4 | -5  | 130.00 | 5.60 |
| - | 4 | 4  | 4   | 57.10  | 1.99 |
|   | 4 | 4  | -4  | 57.71  | 2.34 |
|   | 4 | -4 | -4  | 53.42  | 2.32 |
|   | 4 | -4 | -4  | 54.92  | 1.91 |
| - | 4 | -4 | 4   | 54.39  | 1.98 |
|   | 4 | 4  | -3  | 16.06  | 0.57 |
| - | 4 | 4  | 3   | 16.25  | 0.60 |
| - | 4 | -4 | 3   | 15.91  | 0.59 |
|   | 4 | -4 | -3  | 16.39  | 0.69 |
|   | 4 | -4 | -3  | 16.04  | 0.59 |
| - | 4 | 4  | 2   | 3.04   | 0.17 |
|   | 4 | 4  | -2  | 2.94   | 0.12 |
|   | 4 | -4 | -2  | 2.66   | 0.17 |
| - | 4 | -4 | 2   | 2.73   | 0.15 |
|   | 4 | -4 | -2  | 2.09   | 0.17 |
|   | 4 | 4  | -1  | 3.49   | 0.22 |
|   | 4 | 4  | -1  | 3.07   | 0.11 |

|   |   |    |    |       |      |
|---|---|----|----|-------|------|
| - | 4 | -4 | 1  | 2.83  | 0.17 |
|   | 4 | -4 | -1 | 2.58  | 0.21 |
|   | 4 | -4 | -1 | 3.08  | 0.19 |
| - | 4 | 4  | 0  | 28.21 | 1.08 |
|   | 4 | 4  | 0  | 31.19 | 1.29 |
|   | 4 | -4 | 0  | 30.72 | 1.27 |
| - | 4 | -4 | 0  | 29.41 | 1.08 |
|   | 4 | 4  | 1  | 0.13  | 0.13 |
| - | 4 | 4  | -1 | 0.15  | 0.09 |
| - | 4 | -4 | -1 | 0.12  | 0.09 |
|   | 4 | -4 | 1  | 0.01  | 0.11 |
| - | 4 | 4  | -2 | 8.92  | 0.36 |
|   | 4 | 4  | 2  | 8.16  | 0.47 |
| - | 4 | 4  | -2 | 9.56  | 0.38 |
| - | 4 | -4 | -2 | 9.79  | 0.38 |
|   | 4 | -4 | 2  | 9.61  | 0.45 |
| - | 4 | -4 | -2 | 9.51  | 0.33 |
|   | 4 | 4  | 3  | 9.38  | 0.51 |
| - | 4 | 4  | -3 | 11.03 | 0.43 |
| - | 4 | 4  | -3 | 10.50 | 0.40 |
|   | 4 | -4 | 3  | 10.55 | 0.49 |
| - | 4 | -4 | -3 | 10.30 | 0.38 |
| - | 4 | -4 | -3 | 10.07 | 0.43 |
|   | 4 | 4  | 4  | 11.67 | 0.59 |
| - | 4 | 4  | -4 | 11.88 | 0.49 |
| - | 4 | 4  | -4 | 11.96 | 0.47 |
| - | 4 | -4 | -4 | 11.91 | 0.48 |
| - | 4 | -4 | -4 | 11.85 | 0.44 |
| - | 4 | 4  | -5 | 4.15  | 0.29 |
|   | 4 | 4  | 5  | 4.06  | 0.34 |
| - | 4 | 4  | -5 | 4.18  | 0.25 |
| - | 4 | -4 | -5 | 4.11  | 0.28 |
| - | 4 | -4 | -5 | 4.11  | 0.22 |
| - | 4 | 4  | -6 | 0.03  | 0.16 |
|   | 4 | 4  | 6  | -0.20 | 0.19 |
| - | 4 | 4  | -6 | -0.04 | 0.14 |
| - | 4 | -4 | -6 | 0.10  | 0.12 |
|   | 4 | -4 | 6  | 0.13  | 0.20 |
| - | 4 | -4 | -6 | -0.06 | 0.16 |
| - | 4 | 4  | -7 | 11.69 | 0.51 |
| - | 4 | 4  | -7 | 9.90  | 0.52 |
|   | 4 | 4  | 7  | 12.72 | 0.63 |
| - | 4 | -4 | -7 | 11.87 | 0.48 |
| - | 4 | -4 | -7 | 12.26 | 0.53 |
|   | 4 | -4 | 7  | 11.73 | 0.61 |
|   | 4 | 4  | 8  | 20.27 | 0.89 |
| - | 4 | 4  | -8 | 17.97 | 0.72 |
| - | 4 | -4 | -8 | 18.31 | 0.75 |
| - | 4 | -4 | -8 | 17.42 | 0.70 |
|   | 4 | -4 | 8  | 17.83 | 0.90 |
|   | 4 | 4  | 9  | 3.80  | 0.41 |
| - | 4 | 4  | -9 | 3.79  | 0.36 |
|   | 4 | -4 | 9  | 3.59  | 0.45 |
| - | 4 | -4 | -9 | 3.23  | 0.37 |

|   |   |    |     |       |      |
|---|---|----|-----|-------|------|
| - | 4 | -4 | -9  | 3.49  | 0.33 |
| - | 4 | 4  | -10 | 5.55  | 0.43 |
|   | 4 | 4  | 10  | 6.59  | 0.54 |
| - | 4 | -4 | -10 | 5.56  | 0.41 |
|   | 4 | -4 | 10  | 6.01  | 0.53 |
| - | 4 | 4  | -11 | 0.35  | 0.28 |
|   | 4 | -4 | 11  | 0.74  | 0.36 |
| - | 4 | -4 | -11 | 0.08  | 0.25 |
| - | 4 | 4  | -12 | 2.30  | 0.34 |
|   | 4 | -4 | 12  | 2.55  | 0.40 |
| - | 4 | -4 | -12 | 2.41  | 0.31 |
| - | 4 | 4  | -13 | 3.23  | 0.39 |
|   | 4 | -4 | 13  | 3.31  | 0.46 |
|   | 4 | 5  | -14 | 0.69  | 0.35 |
| - | 4 | -5 | 14  | 0.40  | 0.34 |
|   | 4 | -5 | -14 | 0.14  | 0.31 |
|   | 4 | 5  | -13 | 5.73  | 0.49 |
|   | 4 | -5 | -13 | 5.56  | 0.48 |
| - | 4 | -5 | 13  | 5.48  | 0.56 |
|   | 4 | 5  | -12 | 9.53  | 0.50 |
| - | 4 | -5 | 12  | 9.53  | 0.61 |
|   | 4 | -5 | -12 | 9.07  | 0.50 |
|   | 4 | 5  | -11 | 0.94  | 0.27 |
|   | 4 | 5  | -11 | 0.68  | 0.26 |
|   | 4 | -5 | -11 | 0.29  | 0.24 |
|   | 4 | 5  | -10 | 18.99 | 0.90 |
|   | 4 | 5  | -10 | 19.33 | 0.77 |
|   | 4 | -5 | -10 | 19.50 | 0.78 |
|   | 4 | 5  | -9  | 1.53  | 0.21 |
|   | 4 | 5  | -9  | 1.34  | 0.24 |
|   | 4 | -5 | -9  | 1.18  | 0.21 |
|   | 4 | -5 | -9  | 1.55  | 0.16 |
|   | 4 | 5  | -8  | 16.09 | 0.63 |
|   | 4 | 5  | -8  | 16.06 | 0.76 |
|   | 4 | -5 | -8  | 16.23 | 0.65 |
|   | 4 | 5  | -7  | 23.96 | 0.88 |
|   | 4 | 5  | -7  | 24.89 | 1.09 |
|   | 4 | 5  | -6  | 3.77  | 0.24 |
|   | 4 | 5  | -6  | 4.09  | 0.31 |
|   | 4 | -5 | -6  | 3.31  | 0.21 |
|   | 4 | 5  | -5  | 1.20  | 0.12 |
|   | 4 | 5  | -5  | 1.67  | 0.21 |
| - | 4 | -5 | 5   | 1.42  | 0.11 |
|   | 4 | -5 | -5  | 0.86  | 0.12 |
| - | 4 | 5  | 4   | 30.71 | 1.04 |
|   | 4 | -5 | -4  | 23.76 | 0.99 |
|   | 4 | -5 | -4  | 29.16 | 1.19 |
| - | 4 | -5 | 4   | 29.40 | 1.02 |
| - | 4 | 5  | 3   | 12.17 | 0.47 |
|   | 4 | 5  | -3  | 12.22 | 0.44 |
|   | 4 | -5 | -3  | 12.05 | 0.47 |
|   | 4 | -5 | -3  | 12.84 | 0.53 |
| - | 4 | -5 | 3   | 11.41 | 0.45 |
|   | 4 | 5  | -2  | 6.06  | 0.22 |

|   |   |    |    |       |      |
|---|---|----|----|-------|------|
| - | 4 | 5  | 2  | 5.81  | 0.26 |
|   | 4 | 5  | -2 | 6.30  | 0.33 |
| - | 4 | -5 | 2  | 5.80  | 0.25 |
|   | 4 | -5 | -2 | 5.91  | 0.28 |
|   | 4 | -5 | -2 | 5.29  | 0.29 |
|   | 4 | 5  | -1 | 16.41 | 0.72 |
| - | 4 | -5 | 1  | 15.89 | 0.60 |
|   | 4 | -5 | -1 | 16.01 | 0.70 |
|   | 4 | -5 | -1 | 15.80 | 0.59 |
| - | 4 | 5  | 0  | 1.62  | 0.15 |
|   | 4 | -5 | 0  | 1.53  | 0.17 |
| - | 4 | -5 | 0  | 1.46  | 0.16 |
|   | 4 | 5  | 1  | 16.74 | 0.74 |
| - | 4 | 5  | -1 | 16.27 | 0.62 |
| - | 4 | -5 | -1 | 15.80 | 0.61 |
|   | 4 | -5 | 1  | 16.39 | 0.72 |
|   | 4 | 5  | 2  | 5.61  | 0.37 |
| - | 4 | 5  | -2 | 6.35  | 0.28 |
| - | 4 | 5  | -2 | 6.56  | 0.29 |
| - | 4 | -5 | -2 | 6.39  | 0.24 |
|   | 4 | -5 | 2  | 6.75  | 0.35 |
| - | 4 | 5  | -3 | 34.51 | 1.24 |
| - | 4 | 5  | -3 | 34.01 | 1.18 |
|   | 4 | 5  | 3  | 30.52 | 1.45 |
| - | 4 | -5 | -3 | 34.14 | 1.15 |
| - | 4 | -5 | -3 | 34.06 | 1.23 |
|   | 4 | -5 | 3  | 34.70 | 1.44 |
|   | 4 | 5  | 4  | 2.09  | 0.21 |
| - | 4 | 5  | -4 | 2.19  | 0.24 |
| - | 4 | 5  | -4 | 1.88  | 0.22 |
|   | 4 | -5 | 4  | 2.00  | 0.28 |
| - | 4 | -5 | -4 | 1.97  | 0.17 |
| - | 4 | -5 | -4 | 2.34  | 0.20 |
| - | 4 | 5  | -5 | 3.26  | 0.26 |
|   | 4 | 5  | 5  | 3.09  | 0.34 |
| - | 4 | 5  | -5 | 2.94  | 0.24 |
| - | 4 | -5 | -5 | 2.60  | 0.20 |
| - | 4 | -5 | -5 | 2.71  | 0.24 |
|   | 4 | 5  | 6  | 32.88 | 1.35 |
| - | 4 | 5  | -6 | 29.58 | 1.14 |
| - | 4 | 5  | -6 | 31.26 | 1.10 |
| - | 4 | -5 | -6 | 31.31 | 1.15 |
| - | 4 | -5 | -6 | 30.75 | 1.08 |
|   | 4 | -5 | 6  | 27.76 | 1.34 |
| - | 4 | 5  | -7 | 5.44  | 0.35 |
| - | 4 | 5  | -7 | 5.86  | 0.36 |
|   | 4 | 5  | 7  | 6.40  | 0.45 |
| - | 4 | -5 | -7 | 5.81  | 0.37 |
| - | 4 | -5 | -7 | 5.39  | 0.32 |
|   | 4 | -5 | 7  | 6.16  | 0.45 |
| - | 4 | 5  | -8 | 7.02  | 0.40 |
|   | 4 | 5  | 8  | 7.55  | 0.50 |
|   | 4 | -5 | 8  | 6.28  | 0.46 |
| - | 4 | -5 | -8 | 6.68  | 0.37 |

|   |   |    |     |       |      |
|---|---|----|-----|-------|------|
| - | 4 | -5 | -8  | 6.18  | 0.41 |
| - | 4 | 5  | -9  | 1.54  | 0.25 |
|   | 4 | 5  | 9   | 1.80  | 0.28 |
|   | 4 | -5 | 9   | 1.40  | 0.33 |
| - | 4 | -5 | -9  | 1.23  | 0.23 |
| - | 4 | -5 | -9  | 1.27  | 0.22 |
| - | 4 | 5  | -10 | -0.06 | 0.23 |
| - | 4 | -5 | -10 | 0.16  | 0.24 |
|   | 4 | -5 | 10  | 0.23  | 0.33 |
| - | 4 | -5 | -10 | 0.09  | 0.22 |
| - | 4 | 5  | -11 | 0.16  | 0.28 |
| - | 4 | -5 | -11 | -0.11 | 0.25 |
|   | 4 | -5 | 11  | 0.24  | 0.36 |
| - | 4 | 5  | -12 | 5.51  | 0.50 |
|   | 4 | -5 | 12  | 5.99  | 0.59 |
| - | 4 | 5  | -13 | 0.09  | 0.34 |
|   | 4 | -5 | 13  | 0.09  | 0.41 |
| - | 4 | -6 | 15  | 2.09  | 0.42 |
|   | 4 | 6  | -14 | 1.79  | 0.38 |
| - | 4 | -6 | 14  | 2.08  | 0.39 |
|   | 4 | -6 | -14 | 1.44  | 0.33 |
|   | 4 | 6  | -13 | 0.09  | 0.31 |
|   | 4 | -6 | -13 | -0.26 | 0.31 |
| - | 4 | -6 | 13  | -0.04 | 0.33 |
|   | 4 | 6  | -12 | 1.25  | 0.27 |
|   | 4 | -6 | -12 | 0.81  | 0.30 |
| - | 4 | -6 | 12  | 1.14  | 0.32 |
|   | 4 | 6  | -11 | 11.56 | 0.54 |
|   | 4 | 6  | -11 | 11.34 | 0.65 |
|   | 4 | -6 | -11 | 11.50 | 0.55 |
|   | 4 | 6  | -10 | 9.66  | 0.49 |
|   | 4 | 6  | -10 | 9.64  | 0.58 |
|   | 4 | -6 | -10 | 9.85  | 0.49 |
|   | 4 | 6  | -9  | 10.97 | 0.59 |
|   | 4 | 6  | -9  | 11.28 | 0.51 |
|   | 4 | -6 | -9  | 11.59 | 0.54 |
|   | 4 | 6  | -8  | 15.80 | 0.63 |
|   | 4 | 6  | -8  | 16.02 | 0.76 |
|   | 4 | -6 | -8  | 15.78 | 0.63 |
|   | 4 | 6  | -7  | 0.20  | 0.20 |
|   | 4 | 6  | -7  | 0.17  | 0.14 |
|   | 4 | -6 | -7  | 0.06  | 0.14 |
|   | 4 | 6  | -6  | 81.63 | 2.80 |
|   | 4 | 6  | -6  | 81.87 | 3.44 |
|   | 4 | 6  | -5  | 17.43 | 0.61 |
|   | 4 | 6  | -5  | 16.24 | 0.77 |
| - | 4 | -6 | 5   | 16.66 | 0.61 |
|   | 4 | -6 | -5  | 16.50 | 0.71 |
| - | 4 | 6  | 4   | 8.97  | 0.37 |
|   | 4 | -6 | -4  | 8.64  | 0.38 |
| - | 4 | -6 | 4   | 8.72  | 0.34 |
|   | 4 | 6  | -3  | 53.38 | 2.25 |
|   | 4 | 6  | -3  | 54.50 | 1.81 |
| - | 4 | 6  | 3   | 53.78 | 1.91 |

|   |   |    |    |       |      |
|---|---|----|----|-------|------|
| - | 4 | -6 | 3  | 52.55 | 1.90 |
|   | 4 | -6 | -3 | 51.55 | 2.22 |
| - | 4 | 6  | 2  | 61.89 | 2.19 |
|   | 4 | 6  | -2 | 62.70 | 2.07 |
|   | 4 | 6  | -2 | 61.13 | 2.57 |
| - | 4 | -6 | 2  | 60.59 | 2.18 |
|   | 4 | -6 | -2 | 58.18 | 2.55 |
|   | 4 | 6  | -1 | 63.10 | 2.62 |
| - | 4 | -6 | 1  | 63.18 | 2.23 |
|   | 4 | -6 | -1 | 62.95 | 2.61 |
|   | 4 | -6 | -1 | 59.85 | 2.13 |
|   | 4 | 6  | 0  | 5.95  | 0.31 |
| - | 4 | 6  | 0  | 5.26  | 0.26 |
|   | 4 | -6 | 0  | 5.31  | 0.29 |
| - | 4 | -6 | 0  | 5.47  | 0.26 |
| - | 4 | 6  | -1 | 8.83  | 0.38 |
|   | 4 | 6  | 1  | 9.30  | 0.45 |
|   | 4 | -6 | 1  | 9.13  | 0.44 |
| - | 4 | -6 | -1 | 8.87  | 0.37 |
| - | 4 | 6  | -2 | 0.55  | 0.12 |
|   | 4 | 6  | 2  | 0.50  | 0.16 |
|   | 4 | -6 | 2  | 0.27  | 0.15 |
| - | 4 | -6 | -2 | 0.41  | 0.06 |
|   | 4 | 6  | 3  | 27.75 | 1.36 |
| - | 4 | 6  | -3 | 32.73 | 1.10 |
| - | 4 | 6  | -3 | 31.78 | 1.15 |
|   | 4 | -6 | 3  | 32.12 | 1.35 |
| - | 4 | -6 | -3 | 31.57 | 1.15 |
| - | 4 | -6 | -3 | 31.63 | 1.07 |
| - | 4 | 6  | -4 | 23.76 | 0.86 |
|   | 4 | 6  | 4  | 24.02 | 1.08 |
| - | 4 | 6  | -4 | 23.44 | 0.91 |
|   | 4 | -6 | 4  | 24.46 | 1.07 |
| - | 4 | -6 | -4 | 23.87 | 0.84 |
| - | 4 | -6 | -4 | 24.47 | 0.91 |
| - | 4 | 6  | -5 | 40.71 | 1.44 |
|   | 4 | 6  | 5  | 44.32 | 1.78 |
| - | 4 | 6  | -5 | 38.68 | 1.50 |
| - | 4 | -6 | -5 | 40.78 | 1.51 |
| - | 4 | -6 | -5 | 41.20 | 1.42 |
|   | 4 | 6  | 6  | 15.12 | 0.67 |
| - | 4 | 6  | -6 | 13.86 | 0.55 |
| - | 4 | 6  | -6 | 12.78 | 0.56 |
|   | 4 | -6 | 6  | 12.99 | 0.67 |
| - | 4 | -6 | -6 | 13.85 | 0.59 |
| - | 4 | -6 | -6 | 13.34 | 0.52 |
| - | 4 | 6  | -7 | 1.43  | 0.17 |
|   | 4 | 6  | 7  | 1.66  | 0.25 |
| - | 4 | 6  | -7 | 1.17  | 0.20 |
| - | 4 | -6 | -7 | 1.21  | 0.21 |
|   | 4 | -6 | 7  | 1.55  | 0.28 |
| - | 4 | -6 | -7 | 1.29  | 0.17 |
| - | 4 | 6  | -8 | 0.43  | 0.22 |
|   | 4 | 6  | 8  | 0.56  | 0.26 |

|   |   |    |     |       |      |
|---|---|----|-----|-------|------|
| - | 4 | -6 | -8  | 0.29  | 0.17 |
|   | 4 | -6 | 8   | 0.53  | 0.29 |
| - | 4 | -6 | -8  | 0.33  | 0.20 |
| - | 4 | 6  | -9  | 0.93  | 0.24 |
| - | 4 | -6 | -9  | 1.21  | 0.20 |
|   | 4 | -6 | 9   | 1.07  | 0.32 |
| - | 4 | -6 | -9  | 1.09  | 0.25 |
| - | 4 | 6  | -10 | 0.34  | 0.27 |
| - | 4 | -6 | -10 | 0.22  | 0.25 |
|   | 4 | -6 | 10  | 0.38  | 0.35 |
| - | 4 | 6  | -11 | 0.43  | 0.30 |
|   | 4 | -6 | 11  | 0.43  | 0.37 |
| - | 4 | 6  | -12 | 1.65  | 0.35 |
|   | 4 | -6 | 12  | 1.75  | 0.42 |
|   | 4 | 7  | -14 | 1.96  | 0.36 |
| - | 4 | -7 | 14  | 2.00  | 0.41 |
|   | 4 | -7 | -14 | 1.54  | 0.34 |
|   | 4 | 7  | -13 | 0.27  | 0.32 |
| - | 4 | -7 | 13  | 0.01  | 0.35 |
|   | 4 | -7 | -13 | -0.12 | 0.32 |
|   | 4 | 7  | -12 | 9.62  | 0.55 |
|   | 4 | -7 | -12 | 9.65  | 0.55 |
|   | 4 | 7  | -11 | 0.69  | 0.26 |
|   | 4 | 7  | -11 | 0.58  | 0.30 |
|   | 4 | -7 | -11 | 0.45  | 0.27 |
|   | 4 | 7  | -10 | 1.70  | 0.30 |
|   | 4 | 7  | -10 | 1.88  | 0.25 |
|   | 4 | -7 | -10 | 1.63  | 0.27 |
|   | 4 | 7  | -9  | 1.37  | 0.22 |
|   | 4 | 7  | -9  | 1.06  | 0.24 |
|   | 4 | -7 | -9  | 0.67  | 0.24 |
|   | 4 | 7  | -8  | 20.40 | 0.96 |
|   | 4 | 7  | -8  | 20.15 | 0.76 |
|   | 4 | -7 | -8  | 20.85 | 0.80 |
|   | 4 | 7  | -7  | 1.45  | 0.17 |
|   | 4 | 7  | -7  | 1.16  | 0.24 |
|   | 4 | -7 | -7  | 1.58  | 0.19 |
|   | 4 | 7  | -6  | 1.28  | 0.15 |
|   | 4 | -7 | -6  | 0.97  | 0.17 |
|   | 4 | 7  | -5  | 0.75  | 0.11 |
|   | 4 | -7 | -5  | 0.40  | 0.15 |
| - | 4 | -7 | 5   | 0.32  | 0.07 |
|   | 4 | 7  | -4  | 4.79  | 0.23 |
| - | 4 | 7  | 4   | 5.04  | 0.26 |
|   | 4 | 7  | -4  | 5.73  | 0.35 |
|   | 4 | -7 | -4  | 4.93  | 0.27 |
| - | 4 | -7 | 4   | 5.21  | 0.23 |
|   | 4 | 7  | -3  | 0.58  | 0.14 |
| - | 4 | 7  | 3   | 0.48  | 0.11 |
|   | 4 | 7  | -3  | 0.59  | 0.08 |
| - | 4 | -7 | 3   | 0.55  | 0.09 |
|   | 4 | -7 | -3  | 1.03  | 0.12 |
|   | 4 | 7  | -2  | 81.16 | 3.40 |
|   | 4 | 7  | -2  | 82.72 | 2.75 |

|   |   |    |    |       |      |
|---|---|----|----|-------|------|
| - | 4 | 7  | 2  | 74.41 | 2.90 |
|   | 4 | -7 | -2 | 81.60 | 3.38 |
| - | 4 | -7 | 2  | 85.24 | 2.89 |
| - | 4 | 7  | 1  | 2.13  | 0.20 |
|   | 4 | 7  | -1 | 2.22  | 0.24 |
|   | 4 | -7 | -1 | 2.37  | 0.19 |
| - | 4 | -7 | 1  | 1.87  | 0.18 |
|   | 4 | 7  | 0  | 41.60 | 1.78 |
| - | 4 | 7  | 0  | 40.97 | 1.51 |
| - | 4 | -7 | 0  | 42.54 | 1.51 |
|   | 4 | -7 | 0  | 41.70 | 1.76 |
| - | 4 | 7  | -1 | -0.02 | 0.11 |
|   | 4 | 7  | 1  | 0.37  | 0.14 |
|   | 4 | -7 | 1  | 0.08  | 0.13 |
| - | 4 | -7 | -1 | -0.01 | 0.11 |
| - | 4 | 7  | -2 | 19.84 | 0.77 |
|   | 4 | 7  | 2  | 20.75 | 0.91 |
|   | 4 | -7 | 2  | 20.47 | 0.89 |
| - | 4 | -7 | -2 | 20.35 | 0.70 |
| - | 4 | 7  | -3 | 0.06  | 0.11 |
|   | 4 | 7  | 3  | 0.59  | 0.18 |
| - | 4 | 7  | -3 | 0.34  | 0.12 |
| - | 4 | -7 | -3 | 0.17  | 0.13 |
|   | 4 | -7 | 3  | 0.29  | 0.17 |
| - | 4 | -7 | -3 | 0.23  | 0.08 |
| - | 4 | 7  | -4 | 1.09  | 0.14 |
|   | 4 | 7  | 4  | 0.39  | 0.20 |
| - | 4 | -7 | -4 | 1.01  | 0.10 |
| - | 4 | -7 | -4 | 0.87  | 0.15 |
|   | 4 | -7 | 4  | 1.04  | 0.20 |
| - | 4 | 7  | -5 | 8.28  | 0.39 |
| - | 4 | 7  | -5 | 8.61  | 0.39 |
|   | 4 | 7  | 5  | 8.81  | 0.50 |
| - | 4 | -7 | -5 | 8.43  | 0.35 |
| - | 4 | -7 | -5 | 8.31  | 0.42 |
|   | 4 | -7 | 5  | 8.71  | 0.50 |
| - | 4 | 7  | -6 | 19.00 | 0.79 |
| - | 4 | 7  | -6 | 20.20 | 0.77 |
|   | 4 | 7  | 6  | 22.71 | 0.95 |
|   | 4 | -7 | 6  | 20.36 | 0.96 |
| - | 4 | -7 | -6 | 19.94 | 0.80 |
| - | 4 | -7 | -6 | 20.88 | 0.74 |
|   | 4 | 7  | 7  | 2.86  | 0.33 |
| - | 4 | 7  | -7 | 2.07  | 0.22 |
| - | 4 | -7 | -7 | 2.08  | 0.23 |
| - | 4 | -7 | -7 | 2.29  | 0.25 |
|   | 4 | -7 | 7  | 2.28  | 0.30 |
| - | 4 | 7  | -8 | 3.91  | 0.36 |
|   | 4 | -7 | 8  | 4.01  | 0.40 |
| - | 4 | -7 | -8 | 3.75  | 0.29 |
| - | 4 | -7 | -8 | 3.86  | 0.37 |
| - | 4 | 7  | -9 | 2.82  | 0.29 |
|   | 4 | -7 | 9  | 2.76  | 0.36 |
| - | 4 | -7 | -9 | 2.56  | 0.28 |

|   |   |    |     |       |      |
|---|---|----|-----|-------|------|
| - | 4 | 7  | -10 | 17.36 | 0.76 |
| - | 4 | -7 | -10 | 19.44 | 0.82 |
|   | 4 | -7 | 10  | 19.27 | 0.96 |
| - | 4 | 7  | -11 | 3.17  | 0.35 |
|   | 4 | -7 | 11  | 3.10  | 0.40 |
| - | 4 | 7  | -12 | 0.64  | 0.34 |
|   | 4 | -7 | 12  | 0.95  | 0.43 |
|   | 4 | 8  | -14 | 0.49  | 0.37 |
|   | 4 | -8 | -14 | 0.02  | 0.35 |
| - | 4 | -8 | 14  | -0.10 | 0.40 |
|   | 4 | 8  | -13 | 0.45  | 0.33 |
|   | 4 | -8 | -13 | -0.03 | 0.32 |
| - | 4 | -8 | 13  | 0.41  | 0.37 |
|   | 4 | 8  | -12 | 0.75  | 0.30 |
|   | 4 | -8 | -12 | 0.33  | 0.30 |
|   | 4 | 8  | -11 | 6.79  | 0.54 |
|   | 4 | 8  | -11 | 6.92  | 0.48 |
|   | 4 | -8 | -11 | 7.42  | 0.49 |
|   | 4 | 8  | -10 | 3.69  | 0.39 |
|   | 4 | 8  | -10 | 3.91  | 0.38 |
|   | 4 | -8 | -10 | 3.40  | 0.36 |
|   | 4 | 8  | -9  | 0.43  | 0.27 |
|   | 4 | 8  | -9  | 0.62  | 0.21 |
|   | 4 | -8 | -9  | 0.11  | 0.21 |
|   | 4 | 8  | -8  | 5.05  | 0.30 |
|   | 4 | 8  | -8  | 4.95  | 0.43 |
|   | 4 | -8 | -8  | 4.60  | 0.34 |
|   | 4 | 8  | -7  | 75.36 | 3.23 |
|   | 4 | 8  | -7  | 77.12 | 2.63 |
|   | 4 | -8 | -7  | 76.76 | 2.63 |
|   | 4 | 8  | -6  | 13.59 | 0.54 |
|   | 4 | -8 | -6  | 13.41 | 0.54 |
|   | 4 | 8  | -5  | 43.35 | 1.46 |
|   | 4 | -8 | -5  | 43.26 | 1.48 |
| - | 4 | -8 | 5   | 40.16 | 1.51 |
|   | 4 | 8  | -4  | 13.40 | 0.63 |
|   | 4 | 8  | -4  | 12.91 | 0.48 |
|   | 4 | -8 | -4  | 12.94 | 0.52 |
| - | 4 | -8 | 4   | 12.46 | 0.49 |
| - | 4 | 8  | 3   | 6.74  | 0.33 |
|   | 4 | 8  | -3  | 7.11  | 0.38 |
| - | 4 | -8 | 3   | 6.75  | 0.29 |
|   | 4 | -8 | -3  | 6.67  | 0.31 |
|   | 4 | -8 | -3  | 5.95  | 0.31 |
|   | 4 | 8  | -2  | 0.84  | 0.16 |
|   | 4 | 8  | -2  | 0.50  | 0.07 |
| - | 4 | -8 | 2   | 0.54  | 0.10 |
|   | 4 | -8 | -2  | 0.73  | 0.13 |
|   | 4 | -8 | -2  | 0.50  | 0.11 |
| - | 4 | 8  | 1   | 26.65 | 0.98 |
|   | 4 | 8  | -1  | 26.88 | 1.15 |
|   | 4 | -8 | -1  | 27.49 | 1.13 |
| - | 4 | -8 | 1   | 26.67 | 0.90 |
|   | 4 | -8 | -1  | 22.46 | 0.93 |

|   |   |    |     |       |      |
|---|---|----|-----|-------|------|
| - | 4 | -8 | 1   | 28.13 | 0.97 |
| - | 4 | 8  | 0   | 0.49  | 0.13 |
|   | 4 | 8  | 0   | 0.76  | 0.15 |
| - | 4 | -8 | 0   | 0.27  | 0.10 |
|   | 4 | -8 | 0   | 0.28  | 0.13 |
| - | 4 | 8  | -1  | 0.07  | 0.12 |
|   | 4 | 8  | 1   | 0.36  | 0.15 |
| - | 4 | -8 | -1  | 0.06  | 0.11 |
|   | 4 | -8 | 1   | 0.01  | 0.14 |
|   | 4 | 8  | 2   | 12.67 | 0.59 |
| - | 4 | 8  | -2  | 12.03 | 0.50 |
|   | 4 | -8 | 2   | 11.98 | 0.58 |
| - | 4 | -8 | -2  | 11.91 | 0.43 |
| - | 4 | 8  | -3  | 27.02 | 1.02 |
|   | 4 | 8  | 3   | 27.73 | 1.21 |
|   | 4 | -8 | 3   | 27.20 | 1.19 |
| - | 4 | -8 | -3  | 27.48 | 0.94 |
|   | 4 | 8  | 4   | 10.21 | 0.57 |
| - | 4 | 8  | -4  | 10.40 | 0.45 |
| - | 4 | -8 | -4  | 10.50 | 0.40 |
|   | 4 | -8 | 4   | 10.36 | 0.53 |
| - | 4 | -8 | -4  | 10.94 | 0.48 |
|   | 4 | 8  | 5   | 9.49  | 0.53 |
| - | 4 | 8  | -5  | 9.27  | 0.44 |
| - | 4 | 8  | -5  | 9.35  | 0.42 |
|   | 4 | -8 | 5   | 9.40  | 0.51 |
| - | 4 | -8 | -5  | 9.77  | 0.46 |
| - | 4 | -8 | -5  | 10.10 | 0.39 |
| - | 4 | 8  | -6  | 0.37  | 0.16 |
|   | 4 | 8  | 6   | 0.12  | 0.21 |
| - | 4 | 8  | -6  | -0.02 | 0.19 |
| - | 4 | -8 | -6  | 0.10  | 0.20 |
|   | 4 | -8 | 6   | 0.08  | 0.23 |
| - | 4 | -8 | -6  | 0.03  | 0.13 |
| - | 4 | 8  | -7  | 4.10  | 0.32 |
|   | 4 | -8 | 7   | 4.06  | 0.43 |
| - | 4 | -8 | -7  | 4.25  | 0.37 |
| - | 4 | 8  | -8  | 1.40  | 0.25 |
| - | 4 | -8 | -8  | 1.71  | 0.25 |
|   | 4 | -8 | 8   | 1.64  | 0.30 |
| - | 4 | 8  | -9  | 19.37 | 0.80 |
|   | 4 | -8 | 9   | 19.17 | 0.97 |
| - | 4 | -8 | -9  | 19.60 | 0.83 |
| - | 4 | 8  | -10 | 0.21  | 0.29 |
| - | 4 | -8 | -10 | 0.13  | 0.27 |
|   | 4 | -8 | 10  | 0.21  | 0.36 |
| - | 4 | 8  | -11 | 0.13  | 0.29 |
|   | 4 | -8 | 11  | 0.66  | 0.39 |
| - | 4 | 8  | -12 | 0.39  | 0.35 |
|   | 4 | -8 | 12  | 0.38  | 0.43 |
|   | 4 | 9  | -14 | 1.37  | 0.40 |
|   | 4 | -9 | -14 | 0.50  | 0.36 |
| - | 4 | -9 | 14  | 1.07  | 0.43 |
|   | 4 | 9  | -13 | 0.28  | 0.34 |

|   |    |     |    |       |      |
|---|----|-----|----|-------|------|
| - | 4  | -9  | 13 | -0.61 | 0.38 |
| 4 | -9 | -13 |    | -0.43 | 0.31 |
| 4 | 9  | -12 |    | 6.57  | 0.51 |
| 4 | -9 | -12 |    | 6.39  | 0.49 |
| 4 | 9  | -11 |    | 2.77  | 0.32 |
| 4 | 9  | -11 |    | 3.50  | 0.47 |
| 4 | -9 | -11 |    | 2.77  | 0.33 |
| 4 | 9  | -10 |    | 0.56  | 0.30 |
| 4 | 9  | -10 |    | 0.77  | 0.25 |
| 4 | -9 | -10 |    | 0.52  | 0.27 |
| 4 | -9 | -10 |    | 0.36  | 0.21 |
| 4 | 9  | -9  |    | -0.02 | 0.25 |
| 4 | 9  | -9  |    | -0.04 | 0.21 |
| 4 | -9 | -9  |    | -0.09 | 0.22 |
| 4 | 9  | -8  |    | 5.91  | 0.36 |
| 4 | 9  | -8  |    | 6.02  | 0.47 |
| 4 | -9 | -8  |    | 5.62  | 0.36 |
| 4 | 9  | -7  |    | 9.59  | 0.44 |
| 4 | 9  | -7  |    | 9.85  | 0.57 |
| 4 | -9 | -7  |    | 9.27  | 0.45 |
| 4 | 9  | -6  |    | 7.10  | 0.45 |
| 4 | 9  | -6  |    | 7.64  | 0.36 |
| 4 | -9 | -6  |    | 7.03  | 0.37 |
| 4 | 9  | -5  |    | 4.18  | 0.33 |
| 4 | 9  | -5  |    | 4.27  | 0.24 |
| 4 | -9 | -5  |    | 4.10  | 0.31 |
| - | 4  | -9  | 5  | 3.93  | 0.22 |
| 4 | 9  | -4  |    | 8.98  | 0.36 |
| 4 | 9  | -4  |    | 8.70  | 0.47 |
| - | 4  | -9  | 4  | 8.77  | 0.36 |
| 4 | -9 | -4  |    | 9.14  | 0.42 |
| 4 | 9  | -3  |    | 6.68  | 0.39 |
| - | 4  | 9   | 3  | 5.90  | 0.30 |
| 4 | -9 | -3  |    | 5.26  | 0.29 |
| - | 4  | -9  | 3  | 6.52  | 0.28 |
| 4 | -9 | -3  |    | 6.13  | 0.31 |
| 4 | 9  | -2  |    | 77.93 | 3.32 |
| 4 | -9 | -2  |    | 78.78 | 2.70 |
| 4 | -9 | -2  |    | 77.76 | 3.30 |
| - | 4  | -9  | 2  | 81.15 | 2.82 |
| - | 4  | 9   | 1  | 24.92 | 0.93 |
| 4 | 9  | -1  |    | 24.22 | 1.08 |
| 4 | -9 | -1  |    | 25.91 | 0.90 |
| - | 4  | -9  | 1  | 24.37 | 0.85 |
| 4 | -9 | -1  |    | 24.66 | 1.06 |
| - | 4  | -9  | 1  | 25.01 | 0.92 |
| 4 | 9  | 0   |    | 21.05 | 0.93 |
| - | 4  | 9   | 0  | 20.16 | 0.79 |
| 4 | -9 | 0   |    | 21.25 | 0.77 |
| 4 | -9 | 0   |    | 21.63 | 0.92 |
| - | 4  | -9  | 0  | 21.51 | 0.80 |
| - | 4  | -9  | 0  | 20.31 | 0.72 |
| - | 4  | 9   | -1 | 21.06 | 0.81 |
| 4 | 9  | 1   |    | 21.31 | 0.95 |

|   |     |     |       |       |      |
|---|-----|-----|-------|-------|------|
| 4 | -9  | 1   | 21.66 | 0.93  |      |
| - | 4   | -9  | -1    | 21.21 | 0.73 |
| - | 4   | -9  | -1    | 21.24 | 0.80 |
| 4 | 9   | 2   | 17.91 | 0.79  |      |
| - | 4   | 9   | -2    | 16.75 | 0.67 |
| 4 | -9  | 2   | 17.14 | 0.78  |      |
| - | 4   | 9   | -3    | 2.56  | 0.25 |
| 4 | 9   | 3   | 2.43  | 0.29  |      |
| 4 | -9  | 3   | 2.78  | 0.29  |      |
| 4 | 9   | 4   | -0.06 | 0.19  |      |
| - | 4   | 9   | -4    | 0.14  | 0.15 |
| - | 4   | 9   | -4    | -0.08 | 0.16 |
| 4 | -9  | 4   | -0.08 | 0.20  |      |
| - | 4   | -9  | -4    | -0.34 | 0.17 |
| 4 | 9   | 5   | 1.60  | 0.23  |      |
| - | 4   | 9   | -5    | 1.61  | 0.18 |
| - | 4   | 9   | -5    | 1.50  | 0.19 |
| - | 4   | -9  | -5    | 1.56  | 0.20 |
| 4 | -9  | 5   | 1.51  | 0.25  |      |
| 4 | 9   | 6   | 26.00 | 1.09  |      |
| - | 4   | 9   | -6    | 23.30 | 0.89 |
| - | 4   | 9   | -6    | 22.83 | 0.91 |
| - | 4   | -9  | -6    | 23.28 | 0.94 |
| 4 | -9  | 6   | 23.17 | 1.09  |      |
| - | 4   | 9   | -7    | 0.29  | 0.20 |
| 4 | -9  | 7   | -0.13 | 0.25  |      |
| - | 4   | -9  | -7    | 0.11  | 0.20 |
| - | 4   | 9   | -8    | 0.05  | 0.22 |
| 4 | -9  | 8   | 0.17  | 0.31  |      |
| - | 4   | -9  | -8    | 0.14  | 0.24 |
| - | 4   | 9   | -9    | 1.69  | 0.27 |
| - | 4   | -9  | -9    | 1.72  | 0.28 |
| 4 | -9  | 9   | 1.46  | 0.33  |      |
| - | 4   | 9   | -10   | 2.47  | 0.33 |
| 4 | -9  | 10  | 2.53  | 0.41  |      |
| - | 4   | -9  | -10   | 2.53  | 0.31 |
| - | 4   | 9   | -11   | 0.05  | 0.32 |
| 4 | -9  | 11  | 0.22  | 0.41  |      |
| - | 4   | 9   | -12   | 0.28  | 0.35 |
| 4 | -9  | 12  | 0.15  | 0.45  |      |
| 4 | 10  | -13 | 0.56  | 0.36  |      |
| 4 | -10 | -13 | -0.30 | 0.30  |      |
| - | 4   | -10 | 13    | -0.13 | 0.40 |
| 4 | 10  | -12 | 1.28  | 0.33  |      |
| 4 | -10 | -12 | 0.93  | 0.32  |      |
| 4 | 10  | -11 | 5.60  | 0.47  |      |
| 4 | 10  | -11 | 5.15  | 0.54  |      |
| 4 | -10 | -11 | 5.32  | 0.47  |      |
| 4 | 10  | -10 | 0.27  | 0.26  |      |
| 4 | 10  | -10 | 0.21  | 0.29  |      |
| 4 | -10 | -10 | -0.04 | 0.21  |      |
| 4 | -10 | -10 | -0.01 | 0.27  |      |
| 4 | 10  | -9  | 5.33  | 0.39  |      |
| 4 | 10  | -9  | 4.92  | 0.44  |      |

|   |     |     |       |       |      |
|---|-----|-----|-------|-------|------|
| 4 | -10 | -9  | 4.76  | 0.42  |      |
| 4 | 10  | -8  | 1.98  | 0.31  |      |
| 4 | 10  | -8  | 2.75  | 0.31  |      |
| 4 | -10 | -8  | 2.20  | 0.26  |      |
| 4 | 10  | -7  | 6.93  | 0.49  |      |
| 4 | 10  | -7  | 6.68  | 0.37  |      |
| 4 | -10 | -7  | 6.82  | 0.42  |      |
| 4 | 10  | -6  | 1.61  | 0.18  |      |
| 4 | 10  | -6  | 1.71  | 0.27  |      |
| 4 | -10 | -6  | 1.48  | 0.22  |      |
| 4 | 10  | -5  | 16.70 | 0.61  |      |
| 4 | 10  | -5  | 16.41 | 0.78  |      |
| - | 4   | -10 | 5     | 16.04 | 0.62 |
| 4 | -10 | -5  | 16.91 | 0.66  |      |
| 4 | 10  | -4  | 0.22  | 0.11  |      |
| 4 | 10  | -4  | 0.21  | 0.19  |      |
| - | 4   | -10 | 4     | 0.07  | 0.11 |
| 4 | -10 | -4  | 0.14  | 0.15  |      |
| 4 | 10  | -3  | 9.34  | 0.50  |      |
| - | 4   | -10 | 3     | 9.29  | 0.39 |
| 4 | -10 | -3  | 8.90  | 0.42  |      |
| 4 | 10  | -2  | 2.35  | 0.29  |      |
| 4 | -10 | -2  | 1.90  | 0.20  |      |
| - | 4   | -10 | 2     | 2.36  | 0.23 |
| 4 | -10 | -2  | 2.36  | 0.27  |      |
| 4 | 10  | -1  | 38.58 | 1.68  |      |
| - | 4   | 10  | 1     | 39.23 | 1.44 |
| 4 | -10 | -1  | 40.32 | 1.38  |      |
| 4 | -10 | -1  | 38.77 | 1.65  |      |
| - | 4   | -10 | 1     | 40.11 | 1.43 |
| - | 4   | -10 | 1     | 37.66 | 1.34 |
| - | 4   | 10  | 0     | 6.33  | 0.32 |
| 4 | 10  | 0   | 6.32  | 0.38  |      |
| - | 4   | -10 | 0     | 6.38  | 0.33 |
| 4 | -10 | 0   | 6.00  | 0.36  |      |
| 4 | -10 | 0   | 6.36  | 0.35  |      |
| - | 4   | 10  | -1    | 19.86 | 0.77 |
| 4 | 10  | 1   | 20.61 | 0.91  |      |
| 4 | -10 | 1   | 20.02 | 0.89  |      |
| - | 4   | -10 | -1    | 19.71 | 0.77 |
| - | 4   | 10  | -2    | 4.02  | 0.29 |
| 4 | 10  | 2   | 4.44  | 0.31  |      |
| - | 4   | -10 | -2    | 3.51  | 0.29 |
| 4 | -10 | 2   | 3.84  | 0.31  |      |
| - | 4   | 10  | -3    | 8.35  | 0.39 |
| 4 | 10  | 3   | 8.61  | 0.46  |      |
| 4 | -10 | 3   | 7.88  | 0.45  |      |
| - | 4   | -10 | -3    | 6.79  | 0.39 |
| 4 | 10  | 4   | 0.39  | 0.20  |      |
| - | 4   | 10  | -4    | 0.61  | 0.16 |
| 4 | -10 | 4   | 0.57  | 0.22  |      |
| - | 4   | -10 | -4    | 0.25  | 0.19 |
| - | 4   | 10  | -5    | 21.53 | 0.84 |
| 4 | 10  | 5   | 24.24 | 1.02  |      |

|   |   |     |     |       |      |
|---|---|-----|-----|-------|------|
| - | 4 | 10  | -5  | 21.82 | 0.87 |
| - | 4 | -10 | -5  | 21.41 | 0.87 |
|   | 4 | -10 | 5   | 22.13 | 1.02 |
| - | 4 | 10  | -6  | 0.64  | 0.18 |
| - | 4 | 10  | -6  | 0.62  | 0.22 |
|   | 4 | -10 | 6   | 0.63  | 0.25 |
| - | 4 | -10 | -6  | 0.83  | 0.23 |
| - | 4 | 10  | -7  | 12.72 | 0.56 |
|   | 4 | -10 | 7   | 12.73 | 0.68 |
| - | 4 | -10 | -7  | 13.27 | 0.61 |
| - | 4 | 10  | -8  | 0.22  | 0.23 |
| - | 4 | -10 | -8  | 0.03  | 0.25 |
|   | 4 | -10 | 8   | -0.06 | 0.31 |
| - | 4 | 10  | -9  | 1.53  | 0.30 |
|   | 4 | -10 | 9   | 1.56  | 0.34 |
| - | 4 | -10 | -9  | 1.28  | 0.29 |
| - | 4 | 10  | -10 | 2.27  | 0.33 |
|   | 4 | -10 | 10  | 1.92  | 0.38 |
| - | 4 | -10 | -10 | 2.27  | 0.33 |
| - | 4 | 10  | -11 | 0.17  | 0.33 |
|   | 4 | -10 | 11  | 0.57  | 0.43 |
|   | 4 | 11  | -13 | 0.96  | 0.38 |
|   | 4 | -11 | -13 | 1.00  | 0.32 |
| - | 4 | -11 | 13  | 1.35  | 0.44 |
|   | 4 | 11  | -12 | 2.63  | 0.36 |
|   | 4 | -11 | -12 | 1.93  | 0.34 |
|   | 4 | 11  | -11 | 4.22  | 0.45 |
|   | 4 | 11  | -11 | 3.97  | 0.52 |
|   | 4 | -11 | -11 | 3.84  | 0.44 |
|   | 4 | 11  | -10 | 7.23  | 0.48 |
|   | 4 | 11  | -10 | 7.31  | 0.57 |
|   | 4 | -11 | -10 | 6.97  | 0.48 |
|   | 4 | -11 | -10 | 6.97  | 0.46 |
|   | 4 | 11  | -9  | 2.78  | 0.35 |
|   | 4 | 11  | -9  | 2.60  | 0.29 |
|   | 4 | -11 | -9  | 2.63  | 0.29 |
|   | 4 | 11  | -8  | 10.01 | 0.48 |
|   | 4 | 11  | -8  | 10.01 | 0.62 |
|   | 4 | -11 | -8  | 10.05 | 0.52 |
|   | 4 | 11  | -7  | 0.28  | 0.27 |
|   | 4 | 11  | -7  | 0.25  | 0.18 |
|   | 4 | -11 | -7  | -0.05 | 0.22 |
|   | 4 | 11  | -6  | 0.98  | 0.25 |
|   | 4 | 11  | -6  | 0.89  | 0.18 |
|   | 4 | -11 | -6  | 1.02  | 0.22 |
|   | 4 | 11  | -5  | 3.84  | 0.36 |
|   | 4 | 11  | -5  | 3.65  | 0.27 |
|   | 4 | -11 | -5  | 4.35  | 0.34 |
|   | 4 | 11  | -4  | 69.74 | 2.41 |
|   | 4 | 11  | -4  | 72.07 | 2.99 |
| - | 4 | -11 | 4   | 70.64 | 2.53 |
|   | 4 | -11 | -4  | 69.94 | 2.43 |
|   | 4 | 11  | -3  | 5.76  | 0.41 |
|   | 4 | -11 | -3  | 5.73  | 0.32 |

|   |   |     |     |       |      |
|---|---|-----|-----|-------|------|
| - | 4 | -11 | 3   | 5.79  | 0.31 |
|   | 4 | 11  | -2  | 16.49 | 0.78 |
|   | 4 | -11 | -2  | 16.68 | 0.64 |
| - | 4 | -11 | 2   | 16.43 | 0.64 |
| - | 4 | 11  | 1   | 4.67  | 0.29 |
|   | 4 | 11  | -1  | 4.86  | 0.35 |
|   | 4 | -11 | -1  | 4.85  | 0.30 |
|   | 4 | -11 | -1  | 5.13  | 0.30 |
| - | 4 | -11 | 1   | 4.81  | 0.29 |
| - | 4 | 11  | 0   | 0.72  | 0.15 |
|   | 4 | 11  | 0   | 0.94  | 0.18 |
|   | 4 | -11 | 0   | 1.08  | 0.16 |
| - | 4 | -11 | 0   | 0.82  | 0.16 |
|   | 4 | -11 | 0   | 0.71  | 0.17 |
|   | 4 | 11  | 1   | 0.68  | 0.17 |
| - | 4 | 11  | -1  | 0.40  | 0.16 |
| - | 4 | -11 | -1  | 0.35  | 0.17 |
|   | 4 | -11 | 1   | 0.50  | 0.18 |
|   | 4 | 11  | 2   | 2.24  | 0.27 |
| - | 4 | 11  | -2  | 1.64  | 0.17 |
|   | 4 | -11 | 2   | 1.70  | 0.21 |
| - | 4 | -11 | -2  | 1.51  | 0.18 |
|   | 4 | 11  | 3   | 20.20 | 0.89 |
| - | 4 | 11  | -3  | 19.39 | 0.77 |
| - | 4 | -11 | -3  | 19.35 | 0.78 |
|   | 4 | -11 | 3   | 19.15 | 0.90 |
| - | 4 | 11  | -4  | 3.91  | 0.30 |
|   | 4 | 11  | 4   | 3.97  | 0.37 |
| - | 4 | -11 | -4  | 3.99  | 0.31 |
|   | 4 | -11 | 4   | 4.02  | 0.37 |
| - | 4 | 11  | -5  | 1.32  | 0.21 |
| - | 4 | 11  | -5  | 1.60  | 0.20 |
|   | 4 | -11 | 5   | 1.17  | 0.27 |
| - | 4 | -11 | -5  | 1.40  | 0.23 |
| - | 4 | 11  | -6  | 12.35 | 0.56 |
|   | 4 | -11 | 6   | 11.64 | 0.64 |
| - | 4 | -11 | -6  | 12.15 | 0.56 |
| - | 4 | 11  | -7  | 0.49  | 0.23 |
|   | 4 | -11 | 7   | 0.54  | 0.28 |
| - | 4 | -11 | -7  | 0.36  | 0.23 |
| - | 4 | 11  | -8  | 0.08  | 0.26 |
| - | 4 | -11 | -8  | -0.08 | 0.26 |
|   | 4 | -11 | 8   | 0.23  | 0.34 |
| - | 4 | 11  | -9  | -0.14 | 0.28 |
|   | 4 | -11 | 9   | 0.21  | 0.33 |
| - | 4 | -11 | -9  | -0.19 | 0.28 |
| - | 4 | 11  | -10 | 0.96  | 0.30 |
|   | 4 | -11 | 10  | 0.84  | 0.40 |
| - | 4 | -11 | -10 | 0.92  | 0.31 |
| - | 4 | 11  | -11 | 3.26  | 0.37 |
| - | 4 | -11 | -11 | 3.59  | 0.40 |
|   | 4 | -11 | 11  | 3.61  | 0.50 |
|   | 4 | 12  | -13 | 3.57  | 0.42 |
|   | 4 | -12 | -13 | 2.83  | 0.39 |

|   |     |     |       |       |
|---|-----|-----|-------|-------|
| 4 | 12  | -12 | 0.21  | 0.33  |
| 4 | -12 | -12 | 0.07  | 0.32  |
| 4 | 12  | -11 | 0.60  | 0.35  |
| 4 | 12  | -11 | 0.43  | 0.30  |
| 4 | -12 | -11 | 0.49  | 0.31  |
| 4 | 12  | -10 | 1.02  | 0.32  |
| 4 | 12  | -10 | 0.90  | 0.28  |
| 4 | -12 | -10 | 1.00  | 0.29  |
| 4 | -12 | -10 | 0.78  | 0.26  |
| 4 | 12  | -9  | 0.77  | 0.26  |
| 4 | 12  | -9  | 0.71  | 0.33  |
| 4 | -12 | -9  | 0.69  | 0.27  |
| 4 | 12  | -8  | 1.52  | 0.32  |
| 4 | 12  | -8  | 1.67  | 0.23  |
| 4 | -12 | -8  | 1.51  | 0.27  |
| 4 | 12  | -7  | 0.78  | 0.30  |
| 4 | 12  | -7  | 0.95  | 0.21  |
| 4 | -12 | -7  | 0.59  | 0.21  |
| 4 | 12  | -6  | 4.04  | 0.44  |
| 4 | 12  | -6  | 4.22  | 0.32  |
| 4 | -12 | -6  | 4.14  | 0.37  |
| 4 | 12  | -5  | 28.06 | 1.26  |
| 4 | 12  | -5  | 26.89 | 0.99  |
| 4 | -12 | -5  | 27.95 | 1.02  |
| 4 | 12  | -4  | 0.66  | 0.21  |
| 4 | 12  | -4  | 0.59  | 0.14  |
| 4 | -12 | -4  | 0.66  | 0.20  |
| - | 4   | -12 | 4     | 0.47  |
|   | 4   | 12  | -3    | 16.82 |
| - | 4   | -12 | 3     | 16.40 |
|   | 4   | -12 | -3    | 17.49 |
|   | 4   | 12  | -2    | 2.04  |
| - | 4   | -12 | 2     | 1.51  |
|   | 4   | -12 | -2    | 2.69  |
|   | 4   | 12  | -1    | 9.39  |
| - | 4   | 12  | 1     | 9.19  |
| - | 4   | -12 | 1     | 9.58  |
|   | 4   | -12 | -1    | 9.63  |
|   | 4   | -12 | -1    | 8.91  |
| - | 4   | 12  | 0     | 3.61  |
|   | 4   | 12  | 0     | 4.03  |
|   | 4   | -12 | 0     | 3.52  |
| - | 4   | -12 | 0     | 3.58  |
|   | 4   | -12 | 0     | 3.71  |
| - | 4   | 12  | -1    | 8.61  |
|   | 4   | 12  | 1     | 8.94  |
| - | 4   | -12 | -1    | 8.64  |
|   | 4   | -12 | 1     | 8.71  |
| - | 4   | 12  | -2    | 10.55 |
|   | 4   | 12  | 2     | 10.96 |
| - | 4   | -12 | -2    | 10.80 |
|   | 4   | -12 | 2     | 10.65 |
|   | 4   | 12  | 3     | 11.74 |
| - | 4   | 12  | -3    | 10.96 |

|   |     |     |       |       |      |
|---|-----|-----|-------|-------|------|
| 4 | -12 | 3   | 10.93 | 0.59  |      |
| - | 4   | -12 | -3    | 11.59 | 0.53 |
| - | 4   | 12  | -4    | 0.44  | 0.19 |
| 4 | -12 | 4   | 0.32  | 0.24  |      |
| - | 4   | -12 | -4    | 0.57  | 0.21 |
| - | 4   | 12  | -5    | 0.40  | 0.18 |
| - | 4   | -12 | -5    | 0.51  | 0.23 |
| 4 | -12 | 5   | 0.46  | 0.27  |      |
| - | 4   | 12  | -6    | 0.73  | 0.24 |
| - | 4   | -12 | -6    | 0.37  | 0.22 |
| 4 | -12 | 6   | 0.45  | 0.30  |      |
| - | 4   | 12  | -7    | 3.74  | 0.36 |
| - | 4   | -12 | -7    | 3.72  | 0.37 |
| 4 | -12 | 7   | 4.11  | 0.47  |      |
| - | 4   | 12  | -8    | 5.65  | 0.45 |
| 4 | -12 | 8   | 5.23  | 0.53  |      |
| - | 4   | -12 | -8    | 5.84  | 0.47 |
| - | 4   | 12  | -9    | 5.26  | 0.43 |
| 4 | -12 | 9   | 5.18  | 0.56  |      |
| - | 4   | -12 | -9    | 4.46  | 0.43 |
| - | 4   | 12  | -10   | 2.74  | 0.36 |
| - | 4   | -12 | -10   | 2.54  | 0.36 |
| 4 | -12 | 10  | 2.82  | 0.46  |      |
| - | 4   | -12 | -11   | 0.54  | 0.35 |
| 4 | 13  | -13 | 1.59  | 0.42  |      |
| 4 | 13  | -12 | 6.30  | 0.55  |      |
| - | 4   | -13 | 12    | 5.42  | 0.66 |
| 4 | -13 | -12 | 5.64  | 0.53  |      |
| 4 | 13  | -11 | 0.47  | 0.31  |      |
| 4 | 13  | -11 | 0.54  | 0.38  |      |
| 4 | -13 | -11 | -0.07 | 0.28  |      |
| 4 | 13  | -10 | 0.98  | 0.29  |      |
| 4 | 13  | -10 | 0.61  | 0.37  |      |
| 4 | -13 | -10 | 0.48  | 0.29  |      |
| 4 | -13 | -10 | 0.49  | 0.26  |      |
| 4 | 13  | -9  | 4.02  | 0.39  |      |
| 4 | 13  | -9  | 3.90  | 0.50  |      |
| 4 | -13 | -9  | 3.54  | 0.40  |      |
| 4 | -13 | -9  | 3.37  | 0.37  |      |
| 4 | 13  | -8  | 2.60  | 0.27  |      |
| 4 | 13  | -8  | 2.54  | 0.36  |      |
| 4 | -13 | -8  | 2.24  | 0.29  |      |
| 4 | 13  | -7  | 3.64  | 0.34  |      |
| 4 | 13  | -7  | 3.76  | 0.41  |      |
| 4 | -13 | -7  | 3.41  | 0.39  |      |
| 4 | 13  | -6  | 3.10  | 0.28  |      |
| 4 | 13  | -6  | 3.55  | 0.44  |      |
| 4 | -13 | -6  | 3.35  | 0.37  |      |
| 4 | 13  | -5  | 5.23  | 0.41  |      |
| 4 | -13 | -5  | 4.81  | 0.34  |      |
| 4 | 13  | -4  | 17.49 | 0.85  |      |
| - | 4   | -13 | 4     | 17.74 | 0.70 |
| 4 | -13 | -4  | 18.64 | 0.71  |      |
| 4 | 13  | -3  | 0.63  | 0.23  |      |

|   |     |     |       |       |
|---|-----|-----|-------|-------|
| 4 | -13 | -3  | 0.17  | 0.18  |
| - | 4   | -13 | 3     | 0.13  |
| 4 | 13  | -2  | 4.93  | 0.40  |
| 4 | -13 | -2  | 5.35  | 0.37  |
| - | 4   | -13 | 2     | 4.79  |
| 4 | 13  | -1  | 5.76  | 0.41  |
| - | 4   | -13 | 1     | 5.54  |
| 4 | -13 | -1  | 5.12  | 0.37  |
| 4 | 13  | 0   | 24.98 | 1.12  |
| 4 | -13 | 0   | 26.15 | 0.94  |
| - | 4   | -13 | 0     | 24.66 |
| 4 | -13 | 0   | 24.80 | 1.10  |
| - | 4   | 13  | -1    | 0.58  |
| 4 | 13  | 1   | 0.64  | 0.19  |
| 4 | -13 | 1   | 0.40  | 0.20  |
| - | 4   | -13 | -1    | 0.49  |
| 4 | -13 | 1   | 0.49  | 0.19  |
| 4 | 13  | 2   | 0.94  | 0.20  |
| - | 4   | 13  | -2    | 0.58  |
| 4 | -13 | 2   | 0.80  | 0.21  |
| - | 4   | -13 | -2    | 0.43  |
| - | 4   | 13  | -3    | 14.95 |
| 4 | -13 | 3   | 16.06 | 0.78  |
| - | 4   | -13 | -3    | 15.90 |
| - | 4   | 13  | -4    | 0.29  |
| - | 4   | -13 | -4    | 0.14  |
| 4 | -13 | 4   | 0.19  | 0.25  |
| - | 4   | 13  | -5    | 0.05  |
| - | 4   | -13 | -5    | -0.05 |
| 4 | -13 | 5   | 0.04  | 0.27  |
| - | 4   | -13 | -6    | 2.17  |
| 4 | -13 | 6   | 2.40  | 0.34  |
| - | 4   | 13  | -7    | 10.36 |
| 4 | -13 | 7   | 10.16 | 0.65  |
| - | 4   | -13 | -7    | 10.23 |
| - | 4   | 13  | -8    | 0.57  |
| - | 4   | -13 | -8    | 0.55  |
| 4 | -13 | 8   | 0.54  | 0.37  |
| - | 4   | 13  | -9    | 0.30  |
| - | 4   | -13 | -9    | 0.07  |
| 4 | -13 | 9   | 0.28  | 0.40  |
| - | 4   | 13  | -10   | 1.98  |
| - | 4   | -13 | -10   | 2.57  |
| 4 | -13 | 10  | 1.93  | 0.47  |
| - | 4   | -13 | -11   | -0.06 |
| 4 | 14  | -12 | 0.11  | 0.36  |
| 4 | -14 | -12 | 0.02  | 0.34  |
| 4 | 14  | -11 | 0.90  | 0.42  |
| 4 | 14  | -11 | 0.40  | 0.35  |
| 4 | -14 | -11 | 0.33  | 0.32  |
| 4 | 14  | -10 | 3.76  | 0.53  |
| 4 | 14  | -10 | 3.41  | 0.35  |
| 4 | -14 | -10 | 2.97  | 0.32  |
| 4 | -14 | -10 | 3.09  | 0.34  |

|   |     |     |       |       |      |
|---|-----|-----|-------|-------|------|
| 4 | 14  | -9  | 2.65  | 0.39  |      |
| 4 | -14 | -9  | 2.23  | 0.28  |      |
| 4 | -14 | -9  | 2.46  | 0.29  |      |
| 4 | 14  | -8  | 0.31  | 0.33  |      |
| 4 | -14 | -8  | -0.03 | 0.27  |      |
| 4 | 14  | -7  | 1.69  | 0.34  |      |
| 4 | -14 | -7  | 1.62  | 0.25  |      |
| 4 | 14  | -6  | 3.87  | 0.46  |      |
| 4 | -14 | -6  | 3.76  | 0.39  |      |
| 4 | 14  | -5  | 5.71  | 0.49  |      |
| 4 | -14 | -5  | 5.81  | 0.41  |      |
| 4 | 14  | -4  | 0.24  | 0.26  |      |
| 4 | -14 | -4  | 0.35  | 0.20  |      |
| - | 4   | -14 | 4     | 0.13  | 0.16 |
| 4 | 14  | -3  | 0.26  | 0.24  |      |
| - | 4   | -14 | 3     | 0.20  | 0.16 |
| 4 | -14 | -3  | 0.16  | 0.21  |      |
| 4 | 14  | -2  | 18.68 | 0.91  |      |
| 4 | -14 | -2  | 19.20 | 0.75  |      |
| - | 4   | -14 | 2     | 18.70 | 0.75 |
| 4 | 14  | -1  | 9.07  | 0.51  |      |
| - | 4   | -14 | 1     | 9.01  | 0.44 |
| 4 | -14 | -1  | 8.49  | 0.46  |      |
| 4 | 14  | 0   | 3.87  | 0.35  |      |
| 4 | -14 | 0   | 3.86  | 0.36  |      |
| - | 4   | -14 | 0     | 3.89  | 0.33 |
| 4 | 14  | 1   | 0.25  | 0.20  |      |
| - | 4   | -14 | -1    | 0.10  | 0.18 |
| 4 | -14 | 1   | -0.05 | 0.20  |      |
| 4 | -14 | 1   | 0.14  | 0.23  |      |
| - | 4   | 14  | -2    | 0.60  | 0.20 |
| - | 4   | -14 | -2    | 0.57  | 0.22 |
| 4 | -14 | 2   | 0.84  | 0.24  |      |
| - | 4   | 14  | -3    | 1.82  | 0.22 |
| 4 | -14 | 3   | 1.67  | 0.27  |      |
| - | 4   | -14 | -3    | 1.71  | 0.24 |
| - | 4   | 14  | -4    | 17.06 | 0.73 |
| 4 | -14 | 4   | 17.19 | 0.84  |      |
| - | 4   | -14 | -4    | 16.99 | 0.72 |
| - | 4   | 14  | -5    | 0.36  | 0.20 |
| 4 | -14 | 5   | 0.19  | 0.30  |      |
| - | 4   | -14 | -5    | 0.01  | 0.22 |
| - | 4   | -14 | -6    | 1.31  | 0.27 |
| 4 | -14 | 6   | 1.09  | 0.34  |      |
| 4 | -14 | 7   | 2.31  | 0.39  |      |
| - | 4   | -14 | -7    | 1.93  | 0.29 |
| - | 4   | 14  | -8    | 1.95  | 0.31 |
| - | 4   | -14 | -8    | 1.75  | 0.32 |
| 4 | -14 | 8   | 2.28  | 0.41  |      |
| - | 4   | 14  | -9    | 0.16  | 0.33 |
| 4 | -14 | 9   | 0.41  | 0.42  |      |
| - | 4   | -14 | -9    | 0.46  | 0.33 |
| 4 | -14 | 10  | 1.47  | 0.48  |      |
| - | 4   | -14 | -10   | 0.87  | 0.36 |

|   |     |     |       |       |
|---|-----|-----|-------|-------|
| 4 | -15 | -11 | -0.01 | 0.32  |
| 4 | -15 | -11 | 0.10  | 0.30  |
| 4 | 15  | -10 | 0.97  | 0.40  |
| 4 | -15 | -10 | 0.82  | 0.32  |
| 4 | -15 | -10 | 1.08  | 0.29  |
| 4 | 15  | -9  | 0.91  | 0.37  |
| 4 | -15 | -9  | 0.69  | 0.30  |
| 4 | -15 | -9  | 0.34  | 0.27  |
| 4 | 15  | -8  | 0.64  | 0.36  |
| 4 | -15 | -8  | 0.73  | 0.28  |
| 4 | 15  | -7  | 1.73  | 0.35  |
| 4 | -15 | -7  | 1.81  | 0.29  |
| 4 | 15  | -6  | 0.21  | 0.31  |
| 4 | -15 | -6  | 0.11  | 0.23  |
| 4 | 15  | -5  | 0.26  | 0.26  |
| 4 | -15 | -5  | 0.40  | 0.22  |
| 4 | 15  | -4  | 1.97  | 0.30  |
| 4 | -15 | -4  | 1.77  | 0.25  |
| 4 | 15  | -3  | 3.06  | 0.41  |
| 4 | -15 | -3  | 3.82  | 0.36  |
| - | 4   | -15 | 3     | 3.39  |
|   |     |     |       | 0.30  |
| 4 | 15  | -2  | 10.97 | 0.62  |
| 4 | -15 | -2  | 11.37 | 0.51  |
| - | 4   | -15 | 2     | 11.77 |
|   |     |     |       | 0.52  |
| 4 | 15  | -1  | 2.98  | 0.36  |
| - | 4   | -15 | 1     | 2.64  |
|   |     |     |       | 0.31  |
| 4 | -15 | -1  | 2.88  | 0.31  |
| 4 | 15  | 0   | 0.28  | 0.21  |
| 4 | -15 | 0   | -0.01 | 0.23  |
| - | 4   | -15 | 0     | 0.33  |
|   |     |     |       | 0.20  |
| - | 4   | -15 | -1    | 0.73  |
|   |     |     |       | 0.22  |
| 4 | -15 | 1   | 0.70  | 0.23  |
| 4 | -15 | 2   | 3.84  | 0.36  |
| - | 4   | -15 | -2    | 3.82  |
|   |     |     |       | 0.33  |
| 4 | -15 | 3   | 4.96  | 0.45  |
| - | 4   | -15 | -3    | 4.33  |
|   |     |     |       | 0.35  |
| 4 | -15 | 4   | 0.56  | 0.29  |
| - | 4   | -15 | -4    | 0.90  |
|   |     |     |       | 0.25  |
| - | 4   | -15 | -5    | 4.61  |
|   |     |     |       | 0.41  |
| 4 | -15 | 5   | 4.43  | 0.47  |
| - | 4   | -15 | -6    | 3.98  |
|   |     |     |       | 0.42  |
| 4 | -15 | 6   | 3.29  | 0.48  |
| - | 4   | -15 | -7    | 0.48  |
|   |     |     |       | 0.27  |
| 4 | -15 | 7   | 0.38  | 0.37  |
| 4 | -15 | 8   | 1.37  | 0.41  |
| - | 4   | -15 | -8    | 0.98  |
|   |     |     |       | 0.30  |
| - | 4   | -15 | -9    | -0.23 |
|   |     |     |       | 0.34  |
| 4 | -15 | 9   | 0.35  | 0.44  |
| 4 | -16 | -11 | 0.03  | 0.34  |
| 4 | -16 | -11 | -0.07 | 0.31  |
| 4 | 16  | -10 | 1.34  | 0.43  |
| 4 | -16 | -10 | 0.92  | 0.32  |
| 4 | -16 | -10 | 0.91  | 0.32  |
| 4 | 16  | -9  | 0.16  | 0.39  |

|   |     |     |       |       |      |
|---|-----|-----|-------|-------|------|
| 4 | -16 | -9  | 0.07  | 0.28  |      |
| 4 | -16 | -9  | 0.08  | 0.30  |      |
| 4 | 16  | -8  | 0.13  | 0.37  |      |
| 4 | -16 | -8  | 0.09  | 0.29  |      |
| 4 | 16  | -7  | 2.54  | 0.36  |      |
| 4 | -16 | -7  | 2.69  | 0.31  |      |
| 4 | 16  | -6  | 13.80 | 0.81  |      |
| 4 | -16 | -6  | 15.61 | 0.67  |      |
| 4 | 16  | -5  | 2.25  | 0.34  |      |
| 4 | -16 | -5  | 1.89  | 0.28  |      |
| 4 | 16  | -4  | 4.58  | 0.47  |      |
| 4 | -16 | -4  | 4.85  | 0.40  |      |
| 4 | 16  | -3  | 1.23  | 0.28  |      |
| 4 | -16 | -3  | 1.32  | 0.23  |      |
| - | 4   | -16 | 3     | 1.08  | 0.21 |
| 4 | 16  | -2  | 0.06  | 0.26  |      |
| - | 4   | -16 | 2     | 0.12  | 0.20 |
| 4 | -16 | -2  | 0.47  | 0.24  |      |
| 4 | 16  | -1  | 1.72  | 0.27  |      |
| - | 4   | -16 | 1     | 1.84  | 0.24 |
| 4 | -16 | -1  | 1.84  | 0.26  |      |
| - | 4   | -16 | 0     | 1.78  | 0.24 |
| 4 | -16 | 0   | 1.36  | 0.27  |      |
| 4 | -16 | 1   | -0.13 | 0.25  |      |
| - | 4   | -16 | -1    | 0.05  | 0.21 |
| 4 | -16 | 2   | 1.67  | 0.27  |      |
| - | 4   | -16 | -2    | 1.96  | 0.26 |
| 4 | -16 | 3   | 0.69  | 0.29  |      |
| - | 4   | -16 | -3    | 0.33  | 0.23 |
| - | 4   | -16 | -4    | 3.81  | 0.40 |
| 4 | -16 | 4   | 4.17  | 0.44  |      |
| 4 | -16 | 5   | 0.51  | 0.33  |      |
| - | 4   | -16 | -5    | 0.37  | 0.25 |
| 4 | -16 | 6   | 0.04  | 0.35  |      |
| - | 4   | -16 | -6    | 0.02  | 0.26 |
| - | 4   | -16 | -7    | 0.45  | 0.31 |
| 4 | -16 | 7   | 0.69  | 0.40  |      |
| 4 | -16 | 8   | 1.00  | 0.43  |      |
| - | 4   | -16 | -8    | 0.94  | 0.34 |
| 4 | -16 | 9   | 0.78  | 0.46  |      |
| - | 4   | -16 | -9    | -0.04 | 0.35 |
| 4 | 17  | -10 | 0.87  | 0.44  |      |
| 4 | -17 | -10 | 0.27  | 0.33  |      |
| 4 | -17 | -10 | 0.27  | 0.32  |      |
| 4 | 17  | -9  | 1.68  | 0.42  |      |
| 4 | -17 | -9  | 1.99  | 0.33  |      |
| 4 | -17 | -9  | 1.12  | 0.31  |      |
| 4 | 17  | -8  | 0.41  | 0.38  |      |
| 4 | -17 | -8  | 0.04  | 0.30  |      |
| 4 | -17 | -8  | 0.07  | 0.26  |      |
| 4 | 17  | -7  | 1.10  | 0.37  |      |
| 4 | -17 | -7  | 1.05  | 0.30  |      |
| 4 | 17  | -6  | 1.93  | 0.37  |      |
| 4 | -17 | -6  | 1.84  | 0.30  |      |

|   |     |     |       |      |      |
|---|-----|-----|-------|------|------|
| 4 | 17  | -5  | 0.01  | 0.32 |      |
| 4 | -17 | -5  | 0.25  | 0.27 |      |
| 4 | 17  | -4  | 0.24  | 0.30 |      |
| 4 | -17 | -4  | 0.18  | 0.26 |      |
| 4 | 17  | -3  | 2.54  | 0.34 |      |
| 4 | -17 | -3  | 2.80  | 0.29 |      |
| - | 4   | -17 | 3     | 2.51 | 0.26 |
| 4 | 17  | -2  | 0.10  | 0.26 |      |
| - | 4   | -17 | 2     | 0.02 | 0.22 |
| 4 | -17 | -2  | 0.25  | 0.26 |      |
| 4 | 17  | -1  | 1.70  | 0.28 |      |
| - | 4   | -17 | 1     | 1.36 | 0.25 |
| 4 | -17 | -1  | 1.87  | 0.28 |      |
| - | 4   | -17 | 0     | 1.94 | 0.26 |
| 4 | -17 | 0   | 1.47  | 0.26 |      |
| - | 4   | -17 | -1    | 7.49 | 0.46 |
| 4 | -17 | 1   | 6.94  | 0.43 |      |
| 4 | -17 | 2   | -0.29 | 0.26 |      |
| - | 4   | -17 | -2    | 0.04 | 0.25 |
| - | 4   | -17 | -3    | 0.14 | 0.24 |
| 4 | -17 | 4   | 0.38  | 0.31 |      |
| - | 4   | -17 | -4    | 0.16 | 0.27 |
| - | 4   | -17 | -5    | 3.37 | 0.38 |
| 4 | -17 | 5   | 3.17  | 0.42 |      |
| - | 4   | -17 | -6    | 0.70 | 0.28 |
| 4 | -17 | 6   | 0.56  | 0.40 |      |
| 4 | -17 | 7   | 2.22  | 0.44 |      |
| - | 4   | -17 | -7    | 2.17 | 0.35 |
| 4 | -17 | 8   | 0.72  | 0.45 |      |
| - | 4   | -17 | -8    | 0.03 | 0.31 |
| 4 | -18 | -10 | 1.93  | 0.35 |      |
| 4 | 18  | -9  | 0.51  | 0.42 |      |
| 4 | -18 | -9  | 0.17  | 0.31 |      |
| 4 | -18 | -9  | 0.55  | 0.34 |      |
| 4 | 18  | -8  | 2.19  | 0.43 |      |
| 4 | -18 | -8  | 2.98  | 0.34 |      |
| 4 | -18 | -8  | 1.54  | 0.33 |      |
| 4 | 18  | -7  | 0.66  | 0.38 |      |
| 4 | -18 | -7  | 0.43  | 0.30 |      |
| 4 | 18  | -6  | 0.56  | 0.36 |      |
| 4 | -18 | -6  | 0.87  | 0.30 |      |
| 4 | 18  | -5  | 0.38  | 0.34 |      |
| 4 | -18 | -5  | 0.78  | 0.29 |      |
| 4 | 18  | -4  | 0.33  | 0.33 |      |
| 4 | -18 | -4  | 0.39  | 0.28 |      |
| 4 | 18  | -3  | -0.01 | 0.29 |      |
| 4 | -18 | -3  | 0.36  | 0.27 |      |
| - | 4   | -18 | 2     | 2.84 | 0.30 |
| 4 | -18 | -2  | 3.81  | 0.42 |      |
| 4 | -18 | -1  | 0.20  | 0.28 |      |
| - | 4   | -18 | 1     | 0.40 | 0.26 |
| 4 | -18 | 0   | 1.92  | 0.30 |      |
| - | 4   | -18 | 0     | 2.24 | 0.28 |
| 4 | -18 | 1   | 0.45  | 0.29 |      |

|   |   |     |    |       |      |
|---|---|-----|----|-------|------|
| - | 4 | -18 | -1 | 0.89  | 0.27 |
|   | 4 | -18 | 2  | 1.68  | 0.30 |
| - | 4 | -18 | -2 | 1.79  | 0.27 |
|   | 4 | -18 | 3  | -0.21 | 0.29 |
| - | 4 | -18 | -3 | 0.02  | 0.27 |
| - | 4 | -18 | -4 | 5.67  | 0.47 |
| - | 4 | -18 | -5 | 0.37  | 0.27 |
|   | 4 | -18 | 5  | 0.30  | 0.37 |
| - | 4 | -18 | -6 | 0.32  | 0.29 |
|   | 4 | -18 | 6  | 0.23  | 0.40 |
|   | 4 | -18 | 7  | 0.52  | 0.43 |
| - | 4 | -18 | -7 | 0.20  | 0.33 |
|   | 4 | -19 | -9 | 1.25  | 0.35 |
|   | 4 | 19  | -8 | 0.44  | 0.41 |
|   | 4 | -19 | -8 | 0.09  | 0.32 |
|   | 4 | -19 | -8 | 0.45  | 0.33 |
|   | 4 | 19  | -7 | 1.58  | 0.42 |
|   | 4 | -19 | -7 | 1.42  | 0.33 |
|   | 4 | 19  | -6 | -0.01 | 0.36 |
|   | 4 | -19 | -6 | 0.60  | 0.31 |
|   | 4 | 19  | -5 | 0.33  | 0.34 |
|   | 4 | -19 | -5 | 0.41  | 0.29 |
|   | 4 | 19  | -4 | 0.52  | 0.33 |
|   | 4 | -19 | -4 | 0.48  | 0.29 |
|   | 4 | -19 | -3 | 3.15  | 0.33 |
|   | 4 | -19 | -2 | 0.93  | 0.30 |
| - | 4 | -19 | 2  | 1.46  | 0.27 |
| - | 4 | -19 | 1  | 0.78  | 0.27 |
|   | 4 | -19 | -1 | 0.76  | 0.29 |
| - | 4 | -19 | 0  | 0.33  | 0.27 |
|   | 4 | -19 | 0  | -0.04 | 0.29 |
| - | 4 | -19 | -1 | 1.15  | 0.27 |
|   | 4 | -19 | 1  | 0.81  | 0.31 |
| - | 4 | -19 | -2 | 0.94  | 0.28 |
|   | 4 | -19 | 2  | 0.86  | 0.30 |
|   | 4 | -19 | 3  | 0.15  | 0.33 |
| - | 4 | -19 | -3 | 0.43  | 0.30 |
| - | 4 | -19 | -4 | 0.37  | 0.31 |
| - | 4 | -19 | -5 | 0.63  | 0.32 |
|   | 4 | -19 | 6  | 0.20  | 0.44 |
| - | 4 | -19 | -6 | -0.02 | 0.33 |
|   | 4 | -19 | 7  | 1.18  | 0.46 |
|   | 4 | 20  | -7 | 0.46  | 0.40 |
|   | 4 | -20 | -7 | 0.09  | 0.32 |
|   | 4 | 20  | -6 | 2.10  | 0.43 |
|   | 4 | -20 | -6 | 2.00  | 0.34 |
|   | 4 | 20  | -5 | 1.29  | 0.38 |
|   | 4 | -20 | -5 | 1.41  | 0.32 |
|   | 4 | -20 | -4 | 1.22  | 0.32 |
|   | 4 | -20 | -3 | 0.58  | 0.30 |
| - | 4 | -20 | 2  | 0.39  | 0.28 |
|   | 4 | -20 | -2 | 0.64  | 0.30 |
|   | 4 | -20 | -1 | -0.09 | 0.30 |
| - | 4 | -20 | 1  | 0.15  | 0.29 |

|   |   |     |     |        |      |
|---|---|-----|-----|--------|------|
| - | 4 | -20 | 0   | 0.21   | 0.29 |
|   | 4 | -20 | 0   | 0.11   | 0.30 |
|   | 4 | -20 | 1   | 0.90   | 0.32 |
| - | 4 | -20 | -1  | 1.43   | 0.32 |
| - | 4 | -20 | -2  | 1.73   | 0.30 |
|   | 4 | -20 | 2   | 1.72   | 0.35 |
| - | 4 | -20 | -3  | 0.85   | 0.32 |
|   | 4 | -20 | 3   | 0.35   | 0.35 |
| - | 4 | -20 | -4  | 2.78   | 0.36 |
|   | 4 | -20 | 4   | 2.81   | 0.38 |
|   | 4 | 21  | -6  | 0.51   | 0.42 |
|   | 4 | -21 | -5  | 0.27   | 0.32 |
|   | 4 | -21 | -4  | 1.67   | 0.33 |
|   | 4 | -21 | -3  | 1.70   | 0.33 |
|   | 4 | -21 | -2  | 0.25   | 0.31 |
| - | 4 | -21 | 1   | 0.25   | 0.31 |
|   | 4 | -21 | -1  | 0.62   | 0.33 |
| - | 4 | -21 | 0   | 0.14   | 0.32 |
|   | 4 | -21 | 0   | 0.24   | 0.33 |
| - | 4 | -21 | -1  | 4.33   | 0.49 |
|   | 4 | -21 | 1   | 3.93   | 0.41 |
|   | 4 | -21 | 2   | 0.38   | 0.35 |
| - | 4 | -21 | -2  | 0.94   | 0.34 |
| - | 4 | -21 | -3  | 0.49   | 0.34 |
|   | 4 | -21 | 3   | -0.18  | 0.36 |
|   | 4 | -21 | 4   | 0.91   | 0.40 |
|   | 4 | -22 | -3  | 0.55   | 0.34 |
|   | 4 | -22 | -2  | 0.81   | 0.35 |
| - | 4 | -22 | 1   | 2.69   | 0.38 |
|   | 4 | -22 | -1  | 2.62   | 0.37 |
| - | 4 | -22 | 0   | 0.20   | 0.34 |
|   | 4 | -22 | 0   | 0.31   | 0.33 |
|   | 4 | -22 | 1   | 0.22   | 0.34 |
| - | 4 | -22 | -1  | 0.01   | 0.34 |
|   | 4 | -22 | 2   | -0.14  | 0.36 |
|   | 4 | -23 | 0   | 1.63   | 0.37 |
|   | 5 | 0   | -15 | -1.10  | 0.33 |
|   | 5 | 0   | -14 | -0.40  | 0.30 |
|   | 5 | 0   | -13 | -0.51  | 0.27 |
|   | 5 | 0   | -12 | 10.65  | 0.54 |
|   | 5 | 0   | -11 | -0.12  | 0.22 |
|   | 5 | 0   | -11 | -0.27  | 0.24 |
|   | 5 | 0   | -10 | 0.24   | 0.23 |
|   | 5 | 0   | -10 | 0.50   | 0.19 |
|   | 5 | 0   | -9  | -0.25  | 0.20 |
|   | 5 | 0   | -9  | -0.07  | 0.17 |
|   | 5 | 0   | -8  | 120.81 | 5.10 |
|   | 5 | 0   | -8  | 122.86 | 4.17 |
|   | 5 | 0   | -7  | -0.03  | 0.15 |
|   | 5 | 0   | -7  | -0.08  | 0.13 |
|   | 5 | 0   | -6  | 6.33   | 0.33 |
| - | 5 | 0   | 6   | 6.62   | 0.28 |
|   | 5 | 0   | -6  | 6.71   | 0.36 |
|   | 5 | 0   | -5  | -0.05  | 0.12 |

|   |   |    |     |        |      |
|---|---|----|-----|--------|------|
| - | 5 | 0  | 5   | -0.03  | 0.07 |
|   | 5 | 0  | -5  | 0.09   | 0.11 |
|   | 5 | 0  | -4  | 97.70  | 3.38 |
|   | 5 | 0  | -4  | 100.21 | 4.15 |
| - | 5 | 0  | 4   | 100.12 | 3.60 |
| - | 5 | 0  | 3   | 0.38   | 0.08 |
|   | 5 | 0  | -3  | 0.21   | 0.11 |
|   | 5 | 0  | -2  | 13.54  | 0.60 |
| - | 5 | 0  | 2   | 13.14  | 0.51 |
|   | 5 | 0  | -2  | 13.33  | 0.49 |
|   | 5 | 0  | -1  | -0.05  | 0.11 |
| - | 5 | 0  | 1   | -0.04  | 0.08 |
|   | 5 | 0  | -1  | -0.07  | 0.07 |
| - | 5 | 0  | 0   | 3.84   | 0.22 |
|   | 5 | 0  | 0   | 4.16   | 0.28 |
| - | 5 | 0  | -1  | 0.02   | 0.10 |
| - | 5 | 0  | -2  | 50.22  | 1.80 |
| - | 5 | 0  | -2  | 50.88  | 1.70 |
|   | 5 | 0  | 2   | 47.88  | 2.11 |
| - | 5 | 0  | -3  | -0.11  | 0.12 |
| - | 5 | 0  | -3  | 0.21   | 0.09 |
|   | 5 | 0  | 3   | -0.09  | 0.17 |
| - | 5 | 0  | -4  | 1.88   | 0.18 |
|   | 5 | 0  | 4   | 1.89   | 0.22 |
| - | 5 | 0  | -4  | 1.86   | 0.18 |
| - | 5 | 0  | -5  | -0.09  | 0.16 |
| - | 5 | 0  | -5  | -0.14  | 0.12 |
|   | 5 | 0  | 5   | 0.13   | 0.20 |
|   | 5 | 0  | 6   | 0.58   | 0.23 |
| - | 5 | 0  | -6  | 0.57   | 0.19 |
| - | 5 | 0  | -6  | 0.73   | 0.16 |
| - | 5 | 0  | -7  | 0.10   | 0.19 |
|   | 5 | 0  | 7   | -0.06  | 0.25 |
| - | 5 | 0  | -7  | 0.13   | 0.17 |
| - | 5 | 0  | -8  | 37.35  | 1.36 |
|   | 5 | 0  | 8   | 35.28  | 1.58 |
| - | 5 | 0  | -8  | 34.45  | 1.28 |
|   | 5 | 0  | 9   | 0.20   | 0.30 |
| - | 5 | 0  | -9  | -0.02  | 0.22 |
|   | 5 | 0  | 10  | 2.58   | 0.37 |
| - | 5 | 0  | -10 | 2.67   | 0.29 |
| - | 5 | 0  | -11 | -0.25  | 0.27 |
|   | 5 | 0  | 11  | 0.18   | 0.36 |
|   | 5 | 0  | 12  | 8.57   | 0.69 |
| - | 5 | 0  | -12 | 7.16   | 0.53 |
| - | 5 | 0  | -13 | -0.33  | 0.33 |
|   | 5 | 1  | -15 | 1.86   | 0.37 |
|   | 5 | -1 | -15 | 1.58   | 0.37 |
|   | 5 | 1  | -14 | 0.06   | 0.34 |
|   | 5 | -1 | -14 | -0.14  | 0.33 |
|   | 5 | 1  | -13 | 6.88   | 0.46 |
|   | 5 | -1 | -13 | 6.68   | 0.51 |
|   | 5 | 1  | -12 | 0.17   | 0.25 |
| - | 5 | -1 | 12  | 0.31   | 0.24 |

|   |    |     |        |        |      |
|---|----|-----|--------|--------|------|
| 5 | -1 | -12 | -0.03  | 0.25   |      |
| 5 | 1  | -11 | 7.29   | 0.46   |      |
| 5 | 1  | -11 | 7.32   | 0.46   |      |
| 5 | -1 | -11 | 7.26   | 0.43   |      |
| 5 | 1  | -10 | 0.05   | 0.20   |      |
| 5 | 1  | -10 | 0.13   | 0.21   |      |
| 5 | -1 | -10 | 0.04   | 0.18   |      |
| 5 | -1 | -10 | -0.35  | 0.22   |      |
| 5 | 1  | -9  | 72.66  | 2.53   |      |
| 5 | 1  | -9  | 74.15  | 3.08   |      |
| 5 | -1 | -9  | 72.80  | 3.07   |      |
| 5 | -1 | -9  | 72.18  | 2.53   |      |
| 5 | 1  | -8  | 6.32   | 0.38   |      |
| 5 | 1  | -8  | 6.07   | 0.35   |      |
| 5 | -1 | -8  | 6.13   | 0.35   |      |
| 5 | -1 | -8  | 6.29   | 0.35   |      |
| 5 | 1  | -7  | 13.39  | 0.54   |      |
| 5 | 1  | -7  | 13.20  | 0.62   |      |
| 5 | -1 | -7  | 13.34  | 0.62   |      |
| 5 | -1 | -7  | 13.51  | 0.55   |      |
| 5 | 1  | -6  | 8.58   | 0.37   |      |
| - | 5  | 1   | 6      | 8.45   | 0.33 |
| 5 | 1  | -6  | 8.27   | 0.42   |      |
| 5 | -1 | -6  | 7.88   | 0.36   |      |
| - | 5  | -1  | 6      | 7.95   | 0.32 |
| 5 | -1 | -6  | 8.47   | 0.41   |      |
| - | 5  | 1   | 5      | 75.60  | 2.67 |
| 5 | 1  | -5  | 75.16  | 2.56   |      |
| 5 | 1  | -5  | 75.95  | 3.14   |      |
| 5 | -1 | -5  | 72.40  | 2.56   |      |
| 5 | -1 | -5  | 74.79  | 3.14   |      |
| - | 5  | -1  | 5      | 75.53  | 2.67 |
| 5 | 1  | -4  | 45.29  | 1.91   |      |
| 5 | 1  | -4  | 44.07  | 1.55   |      |
| - | 5  | 1   | 4      | 45.25  | 1.62 |
| 5 | -1 | -4  | 45.75  | 1.56   |      |
| 5 | -1 | -4  | 43.95  | 1.90   |      |
| - | 5  | -1  | 4      | 46.08  | 1.62 |
| 5 | 1  | -3  | 133.21 | 5.53   |      |
| - | 5  | 1   | 3      | 138.19 | 4.75 |
| 5 | -1 | -3  | 131.78 | 5.56   |      |
| - | 5  | -1  | 3      | 137.11 | 4.72 |
| 5 | -1 | -3  | 122.33 | 4.51   |      |
| - | 5  | 1   | 2      | 4.60   | 0.22 |
| 5 | 1  | -2  | 4.23   | 0.21   |      |
| 5 | 1  | -2  | 4.72   | 0.28   |      |
| - | 5  | -1  | 2      | 4.23   | 0.22 |
| 5 | -1 | -2  | 4.59   | 0.27   |      |
| 5 | 1  | -1  | 26.53  | 1.14   |      |
| - | 5  | 1   | 1      | 26.65  | 0.96 |
| 5 | 1  | -1  | 26.91  | 0.91   |      |
| - | 5  | -1  | 1      | 25.56  | 0.96 |
| 5 | -1 | -1  | 25.72  | 1.13   |      |
| 5 | 1  | 0   | 4.83   | 0.19   |      |

|   |   |    |     |       |      |
|---|---|----|-----|-------|------|
| - | 5 | -1 | 0   | 3.90  | 0.22 |
|   | 5 | -1 | 0   | 3.95  | 0.29 |
| - | 5 | 1  | -1  | 16.94 | 0.61 |
|   | 5 | 1  | 1   | 14.29 | 0.71 |
|   | 5 | -1 | 1   | 16.17 | 0.72 |
|   | 5 | 1  | 2   | 0.27  | 0.17 |
| - | 5 | 1  | -2  | 0.43  | 0.13 |
|   | 5 | -1 | 2   | 0.16  | 0.05 |
| - | 5 | -1 | -2  | 0.33  | 0.08 |
| - | 5 | -1 | -2  | 0.17  | 0.11 |
|   | 5 | 1  | 3   | 38.59 | 1.74 |
| - | 5 | 1  | -3  | 41.56 | 1.49 |
| - | 5 | 1  | -3  | 41.17 | 1.40 |
| - | 5 | -1 | -3  | 41.16 | 1.48 |
|   | 5 | -1 | 3   | 39.82 | 1.73 |
| - | 5 | -1 | -3  | 41.30 | 1.39 |
| - | 5 | 1  | -4  | 0.70  | 0.14 |
|   | 5 | 1  | 4   | 0.65  | 0.18 |
| - | 5 | 1  | -4  | 0.65  | 0.12 |
| - | 5 | -1 | -4  | 0.51  | 0.11 |
|   | 5 | -1 | 4   | 0.48  | 0.19 |
| - | 5 | -1 | -4  | 0.38  | 0.15 |
| - | 5 | 1  | -5  | 28.64 | 1.03 |
| - | 5 | 1  | -5  | 29.00 | 1.10 |
|   | 5 | 1  | 5   | 28.51 | 1.28 |
| - | 5 | -1 | -5  | 29.73 | 1.10 |
| - | 5 | -1 | -5  | 29.79 | 1.03 |
|   | 5 | -1 | 5   | 29.34 | 1.28 |
|   | 5 | 1  | 6   | 3.49  | 0.38 |
| - | 5 | 1  | -6  | 3.77  | 0.32 |
| - | 5 | 1  | -6  | 3.67  | 0.27 |
| - | 5 | -1 | -6  | 3.52  | 0.33 |
|   | 5 | -1 | 6   | 3.59  | 0.34 |
| - | 5 | -1 | -6  | 3.85  | 0.26 |
| - | 5 | 1  | -7  | 0.75  | 0.20 |
|   | 5 | 1  | 7   | 0.64  | 0.25 |
| - | 5 | 1  | -7  | 0.80  | 0.19 |
| - | 5 | -1 | -7  | 0.61  | 0.18 |
| - | 5 | -1 | -7  | 0.64  | 0.20 |
|   | 5 | -1 | 7   | 0.67  | 0.24 |
| - | 5 | 1  | -8  | 4.16  | 0.31 |
|   | 5 | 1  | 8   | 4.67  | 0.44 |
| - | 5 | 1  | -8  | 4.35  | 0.40 |
| - | 5 | -1 | -8  | 5.12  | 0.40 |
| - | 5 | -1 | -8  | 4.62  | 0.33 |
|   | 5 | -1 | 8   | 4.78  | 0.46 |
|   | 5 | 1  | 9   | 15.82 | 0.82 |
| - | 5 | 1  | -9  | 15.49 | 0.66 |
|   | 5 | -1 | 9   | 15.50 | 0.82 |
| - | 5 | -1 | -9  | 15.19 | 0.65 |
| - | 5 | -1 | -9  | 16.97 | 0.74 |
| - | 5 | 1  | -10 | -0.10 | 0.25 |
|   | 5 | 1  | 10  | 0.36  | 0.33 |
|   | 5 | -1 | 10  | -0.15 | 0.33 |

|   |   |    |     |       |      |
|---|---|----|-----|-------|------|
| - | 5 | -1 | -10 | 0.07  | 0.24 |
|   | 5 | 1  | 11  | 0.36  | 0.36 |
| - | 5 | 1  | -11 | 0.25  | 0.28 |
|   | 5 | -1 | 11  | 0.08  | 0.35 |
| - | 5 | -1 | -11 | -0.11 | 0.27 |
| - | 5 | 1  | -12 | 0.92  | 0.33 |
|   | 5 | 1  | 12  | 1.28  | 0.39 |
| - | 5 | -1 | -12 | 0.65  | 0.31 |
|   | 5 | -1 | 12  | 1.12  | 0.40 |
| - | 5 | 1  | -13 | 2.51  | 0.37 |
| - | 5 | -1 | -13 | 2.19  | 0.36 |
|   | 5 | -1 | 13  | 3.08  | 0.48 |
|   | 5 | 2  | -15 | -0.21 | 0.38 |
|   | 5 | -2 | -15 | -0.52 | 0.36 |
|   | 5 | 2  | -14 | -0.12 | 0.33 |
|   | 5 | -2 | -14 | -0.37 | 0.33 |
|   | 5 | 2  | -13 | 0.92  | 0.29 |
|   | 5 | -2 | -13 | 0.88  | 0.29 |
|   | 5 | 2  | -12 | 9.45  | 0.54 |
|   | 5 | -2 | -12 | 9.71  | 0.51 |
|   | 5 | 2  | -11 | 1.34  | 0.25 |
|   | 5 | 2  | -11 | 1.22  | 0.26 |
|   | 5 | -2 | -11 | 1.00  | 0.25 |
|   | 5 | 2  | -10 | 1.35  | 0.23 |
|   | 5 | 2  | -10 | 1.34  | 0.24 |
|   | 5 | -2 | -10 | 1.10  | 0.23 |
|   | 5 | 2  | -9  | 2.55  | 0.27 |
|   | 5 | 2  | -9  | 2.77  | 0.31 |
|   | 5 | -2 | -9  | 2.52  | 0.25 |
|   | 5 | -2 | -9  | 2.43  | 0.28 |
|   | 5 | 2  | -8  | 39.55 | 1.41 |
|   | 5 | 2  | -8  | 39.66 | 1.71 |
|   | 5 | -2 | -8  | 38.91 | 1.69 |
|   | 5 | -2 | -8  | 40.88 | 1.42 |
|   | 5 | 2  | -7  | 0.14  | 0.13 |
|   | 5 | 2  | -7  | 0.03  | 0.16 |
|   | 5 | -2 | -7  | 0.04  | 0.15 |
|   | 5 | -2 | -7  | 0.04  | 0.13 |
| - | 5 | 2  | 6   | 77.71 | 2.70 |
|   | 5 | 2  | -6  | 73.62 | 2.59 |
|   | 5 | 2  | -6  | 75.23 | 3.17 |
|   | 5 | -2 | -6  | 74.15 | 3.16 |
|   | 5 | -2 | -6  | 76.19 | 2.59 |
| - | 5 | -2 | 6   | 76.42 | 2.69 |
|   | 5 | 2  | -5  | 1.79  | 0.22 |
|   | 5 | 2  | -5  | 1.75  | 0.18 |
| - | 5 | 2  | 5   | 1.30  | 0.14 |
|   | 5 | -2 | -5  | 1.72  | 0.18 |
|   | 5 | -2 | -5  | 1.14  | 0.14 |
| - | 5 | -2 | 5   | 1.29  | 0.13 |
|   | 5 | 2  | -4  | 2.93  | 0.18 |
| - | 5 | 2  | 4   | 3.24  | 0.18 |
|   | 5 | 2  | -4  | 3.54  | 0.23 |
|   | 5 | -2 | -4  | 3.41  | 0.22 |

|   |    |    |       |       |
|---|----|----|-------|-------|
| 5 | -2 | -4 | 3.06  | 0.21  |
| - | 5  | -2 | 4     | 3.56  |
| 5 | 2  | -3 | 41.44 | 1.44  |
| - | 5  | 2  | 3     | 41.90 |
| 5 | 2  | -3 | 42.84 | 1.78  |
| 5 | -2 | -3 | 41.78 | 1.77  |
| - | 5  | -2 | 3     | 40.96 |
| 5 | -2 | -3 | 43.27 | 1.45  |
| 5 | 2  | -2 | 3.41  | 0.17  |
| - | 5  | 2  | 2     | 3.90  |
| 5 | 2  | -2 | 4.02  | 0.24  |
| 5 | -2 | -2 | 3.14  | 0.20  |
| - | 5  | -2 | 2     | 3.47  |
| 5 | -2 | -2 | 3.50  | 0.23  |
| - | 5  | 2  | 1     | 0.65  |
| 5 | 2  | -1 | 0.75  | 0.07  |
| 5 | 2  | -1 | 0.46  | 0.10  |
| - | 5  | -2 | 1     | 0.54  |
| 5 | -2 | -1 | 0.44  | 0.12  |
| 5 | 2  | 0  | 44.00 | 1.42  |
| - | 5  | -2 | 0     | 40.80 |
| 5 | -2 | 0  | 40.18 | 1.77  |
| - | 5  | 2  | -1    | 34.03 |
| 5 | 2  | 1  | 32.36 | 1.44  |
| 5 | -2 | 1  | 34.02 | 1.44  |
| - | 5  | 2  | -2    | 35.41 |
| 5 | 2  | 2  | 33.77 | 1.49  |
| - | 5  | 2  | -2    | 35.57 |
| - | 5  | -2 | -2    | 34.60 |
| 5 | -2 | 2  | 34.21 | 1.48  |
| - | 5  | -2 | -2    | 33.78 |
| - | 5  | 2  | -3    | 10.84 |
| 5 | 2  | 3  | 9.73  | 0.54  |
| - | 5  | 2  | -3    | 11.55 |
| - | 5  | -2 | -3    | 10.85 |
| - | 5  | -2 | -3    | 11.19 |
| 5 | 2  | 4  | 74.81 | 3.17  |
| - | 5  | 2  | -4    | 75.13 |
| - | 5  | 2  | -4    | 74.41 |
| - | 5  | -2 | -4    | 76.60 |
| - | 5  | -2 | -4    | 74.27 |
| 5 | 2  | 5  | 4.24  | 0.34  |
| - | 5  | 2  | -5    | 4.71  |
| - | 5  | 2  | -5    | 4.37  |
| 5 | -2 | 5  | 4.72  | 0.34  |
| - | 5  | -2 | -5    | 4.58  |
| - | 5  | -2 | -5    | 4.11  |
| - | 5  | 2  | -6    | 26.48 |
| - | 5  | 2  | -6    | 25.74 |
| 5 | 2  | 6  | 26.26 | 1.18  |
| - | 5  | -2 | -6    | 26.82 |
| 5 | -2 | 6  | 26.14 | 1.18  |
| - | 5  | -2 | -6    | 26.49 |
| 5 | 2  | 7  | -0.11 | 0.24  |

|   |   |    |     |       |      |
|---|---|----|-----|-------|------|
| - | 5 | 2  | -7  | -0.12 | 0.17 |
| - | 5 | 2  | -7  | -0.43 | 0.19 |
|   | 5 | -2 | 7   | 0.19  | 0.24 |
| - | 5 | -2 | -7  | -0.04 | 0.18 |
| - | 5 | -2 | -7  | 0.00  | 0.16 |
|   | 5 | 2  | 8   | 4.90  | 0.44 |
| - | 5 | 2  | -8  | 4.67  | 0.34 |
| - | 5 | 2  | -8  | 4.47  | 0.39 |
| - | 5 | -2 | -8  | 4.88  | 0.43 |
|   | 5 | -2 | 8   | 4.64  | 0.46 |
| - | 5 | -2 | -8  | 4.33  | 0.35 |
|   | 5 | 2  | 9   | 0.83  | 0.30 |
| - | 5 | 2  | -9  | 1.09  | 0.24 |
| - | 5 | -2 | -9  | 0.61  | 0.21 |
| - | 5 | -2 | -9  | 0.74  | 0.27 |
|   | 5 | -2 | 9   | 0.53  | 0.31 |
| - | 5 | 2  | -10 | -0.05 | 0.25 |
|   | 5 | 2  | 10  | 0.17  | 0.32 |
| - | 5 | -2 | -10 | -0.16 | 0.23 |
|   | 5 | -2 | 10  | 0.57  | 0.34 |
|   | 5 | 2  | 11  | 1.31  | 0.36 |
| - | 5 | 2  | -11 | 0.83  | 0.29 |
|   | 5 | -2 | 11  | 0.76  | 0.34 |
| - | 5 | -2 | -11 | 0.72  | 0.27 |
| - | 5 | 2  | -12 | 4.07  | 0.46 |
| - | 5 | -2 | -12 | 3.30  | 0.35 |
|   | 5 | -2 | 12  | 4.06  | 0.57 |
| - | 5 | 2  | -13 | 1.67  | 0.36 |
|   | 5 | -2 | 13  | 1.76  | 0.44 |
|   | 5 | 3  | -15 | 0.41  | 0.36 |
|   | 5 | -3 | -15 | 0.09  | 0.38 |
|   | 5 | 3  | -14 | 0.07  | 0.32 |
|   | 5 | -3 | -14 | 0.23  | 0.31 |
|   | 5 | 3  | -13 | 11.04 | 0.60 |
| - | 5 | -3 | 13  | 10.97 | 0.66 |
|   | 5 | -3 | -13 | 10.70 | 0.57 |
|   | 5 | 3  | -12 | -0.08 | 0.27 |
|   | 5 | -3 | -12 | -0.48 | 0.28 |
|   | 5 | 3  | -11 | 29.27 | 1.31 |
|   | 5 | 3  | -11 | 28.79 | 1.10 |
|   | 5 | -3 | -11 | 29.67 | 1.10 |
|   | 5 | 3  | -10 | 10.78 | 0.52 |
|   | 5 | 3  | -10 | 10.63 | 0.58 |
|   | 5 | -3 | -10 | 10.33 | 0.50 |
|   | 5 | 3  | -9  | 4.70  | 0.38 |
|   | 5 | 3  | -9  | 4.90  | 0.35 |
|   | 5 | -3 | -9  | 4.62  | 0.35 |
|   | 5 | 3  | -8  | 15.13 | 0.61 |
|   | 5 | 3  | -8  | 15.08 | 0.73 |
|   | 5 | -3 | -8  | 16.01 | 0.61 |
|   | 5 | -3 | -8  | 14.64 | 0.69 |
|   | 5 | 3  | -7  | 1.16  | 0.14 |
|   | 5 | 3  | -7  | 0.97  | 0.17 |
|   | 5 | -3 | -7  | 1.11  | 0.17 |

|   |    |    |        |        |
|---|----|----|--------|--------|
| 5 | -3 | -7 | 1.05   | 0.13   |
| 5 | 3  | -6 | 0.71   | 0.17   |
| - | 5  | 3  | 6      | 0.53   |
| 5 | 3  | -6 | 0.67   | 0.13   |
| 5 | -3 | -6 | 0.66   | 0.16   |
| 5 | -3 | -6 | 0.63   | 0.12   |
| - | 5  | -3 | 6      | 0.60   |
| - | 5  | 3  | 5      | 151.17 |
| 5 | 3  | -5 | 152.05 | 6.28   |
| 5 | 3  | -5 | 144.96 | 5.10   |
| - | 5  | -3 | 5      | 151.43 |
| 5 | -3 | -5 | 147.84 | 6.29   |
| 5 | -3 | -5 | 154.82 | 5.11   |
| - | 5  | 3  | 4      | 14.46  |
| 5 | 3  | -4 | 14.61  | 0.65   |
| 5 | -3 | -4 | 14.20  | 0.62   |
| - | 5  | -3 | 4      | 13.72  |
| 5 | -3 | -4 | 14.24  | 0.54   |
| 5 | 3  | -3 | 2.18   | 0.15   |
| - | 5  | 3  | 3      | 1.65   |
| 5 | 3  | -3 | 1.85   | 0.22   |
| - | 5  | -3 | 3      | 1.64   |
| 5 | -3 | -3 | 2.05   | 0.17   |
| 5 | -3 | -3 | 1.48   | 0.17   |
| 5 | 3  | -2 | 118.31 | 3.96   |
| - | 5  | 3  | 2      | 123.69 |
| 5 | -3 | -2 | 108.22 | 4.88   |
| - | 5  | -3 | 2      | 117.21 |
| 5 | -3 | -2 | 117.37 | 3.97   |
| - | 5  | 3  | 1      | 99.92  |
| 5 | 3  | -1 | 90.27  | 3.21   |
| 5 | -3 | -1 | 94.81  | 3.23   |
| - | 5  | -3 | 1      | 94.93  |
| 5 | -3 | -1 | 95.04  | 3.98   |
| 5 | 3  | 0  | 30.23  | 1.35   |
| 5 | 3  | 0  | 32.03  | 1.07   |
| 5 | -3 | 0  | 32.58  | 1.35   |
| - | 5  | -3 | 0      | 30.36  |
| 5 | 3  | 1  | 1.12   | 0.17   |
| - | 5  | 3  | -1     | 1.18   |
| 5 | -3 | 1  | 1.03   | 0.16   |
| - | 5  | 3  | -2     | 35.94  |
| - | 5  | 3  | -2     | 36.42  |
| 5 | 3  | 2  | 34.31  | 1.54   |
| 5 | -3 | 2  | 37.52  | 1.54   |
| - | 5  | -3 | -2     | 35.98  |
| - | 5  | -3 | -2     | 35.44  |
| - | 5  | 3  | -3     | 0.95   |
| - | 5  | 3  | -3     | 0.89   |
| 5 | 3  | 3  | 0.80   | 0.19   |
| - | 5  | -3 | -3     | 1.02   |
| 5 | -3 | 3  | 0.95   | 0.19   |
| - | 5  | -3 | -3     | 0.95   |
| - | 5  | 3  | -4     | 9.36   |

|   |    |     |       |       |      |
|---|----|-----|-------|-------|------|
| 5 | 3  | 4   | 9.22  | 0.53  |      |
| - | 5  | 3   | -4    | 9.89  | 0.40 |
| - | 5  | -3  | -4    | 10.10 | 0.38 |
| - | 5  | -3  | -4    | 9.71  | 0.42 |
| 5 | 3  | 5   | 46.70 | 2.00  |      |
| - | 5  | 3   | -5    | 47.42 | 1.71 |
| - | 5  | 3   | -5    | 46.81 | 1.62 |
| - | 5  | -3  | -5    | 45.35 | 1.69 |
| - | 5  | -3  | -5    | 46.11 | 1.60 |
| - | 5  | 3   | -6    | 7.61  | 0.37 |
| - | 5  | 3   | -6    | 7.18  | 0.41 |
| 5 | 3  | 6   | 7.30  | 0.48  |      |
| - | 5  | -3  | -6    | 7.41  | 0.35 |
| - | 5  | -3  | -6    | 7.23  | 0.40 |
| 5 | -3 | 6   | 7.31  | 0.48  |      |
| - | 5  | 3   | -7    | 6.14  | 0.40 |
| 5 | 3  | 7   | 6.00  | 0.45  |      |
| - | 5  | 3   | -7    | 5.51  | 0.32 |
| 5 | -3 | 7   | 5.95  | 0.47  |      |
| - | 5  | -3  | -7    | 5.88  | 0.32 |
| - | 5  | -3  | -7    | 6.07  | 0.39 |
| - | 5  | 3   | -8    | 0.12  | 0.23 |
| - | 5  | 3   | -8    | 0.34  | 0.20 |
| 5 | 3  | 8   | 0.54  | 0.26  |      |
| - | 5  | -3  | -8    | 0.24  | 0.19 |
| 5 | -3 | 8   | 0.27  | 0.29  |      |
| - | 5  | -3  | -8    | 0.10  | 0.21 |
| 5 | 3  | 9   | 3.93  | 0.45  |      |
| - | 5  | 3   | -9    | 3.19  | 0.35 |
| - | 5  | -3  | -9    | 3.07  | 0.34 |
| - | 5  | -3  | -9    | 3.35  | 0.30 |
| 5 | -3 | 9   | 2.94  | 0.37  |      |
| - | 5  | 3   | -10   | 0.02  | 0.25 |
| 5 | 3  | 10  | 0.32  | 0.32  |      |
| - | 5  | -3  | -10   | -0.17 | 0.23 |
| 5 | -3 | 10  | 0.46  | 0.34  |      |
| - | 5  | 3   | -11   | 0.70  | 0.29 |
| 5 | 3  | 11  | 1.21  | 0.37  |      |
| 5 | -3 | 11  | 0.95  | 0.38  |      |
| - | 5  | -3  | -11   | 0.61  | 0.26 |
| - | 5  | 3   | -12   | 0.26  | 0.32 |
| 5 | -3 | 12  | 0.60  | 0.41  |      |
| - | 5  | 3   | -13   | 1.32  | 0.37 |
| 5 | -3 | 13  | 1.26  | 0.45  |      |
| 5 | 4  | -15 | -0.55 | 0.38  |      |
| 5 | 4  | -14 | 1.71  | 0.37  |      |
| 5 | -4 | -14 | 1.42  | 0.36  |      |
| 5 | 4  | -13 | 0.00  | 0.31  |      |
| - | 5  | -4  | 13    | -0.21 | 0.30 |
| 5 | -4 | -13 | -0.37 | 0.28  |      |
| 5 | 4  | -12 | 0.97  | 0.29  |      |
| 5 | 4  | -12 | 1.38  | 0.29  |      |
| 5 | -4 | -12 | 0.66  | 0.30  |      |
| 5 | 4  | -11 | 6.07  | 0.46  |      |

|   |    |     |        |        |      |
|---|----|-----|--------|--------|------|
| 5 | 4  | -11 | 5.79   | 0.39   |      |
| 5 | -4 | -11 | 5.40   | 0.45   |      |
| 5 | 4  | -10 | 0.88   | 0.25   |      |
| 5 | 4  | -10 | 0.93   | 0.23   |      |
| 5 | -4 | -10 | 0.72   | 0.23   |      |
| 5 | 4  | -9  | 1.11   | 0.20   |      |
| 5 | 4  | -9  | 0.68   | 0.23   |      |
| 5 | -4 | -9  | 0.41   | 0.23   |      |
| 5 | 4  | -8  | 5.01   | 0.32   |      |
| 5 | 4  | -8  | 5.01   | 0.38   |      |
| 5 | -4 | -8  | 4.83   | 0.37   |      |
| 5 | 4  | -7  | 17.25  | 0.63   |      |
| 5 | 4  | -7  | 17.37  | 0.78   |      |
| 5 | -4 | -7  | 15.46  | 0.64   |      |
| 5 | -4 | -7  | 16.53  | 0.73   |      |
| 5 | 4  | -6  | 27.84  | 1.02   |      |
| - | 5  | 4   | 6      | 29.92  | 1.06 |
| 5 | 4  | -6  | 29.26  | 1.26   |      |
| 5 | -4 | -6  | 27.85  | 1.23   |      |
| 5 | -4 | -6  | 30.33  | 1.04   |      |
| - | 5  | -4  | 6      | 28.50  | 1.04 |
| 5 | 4  | -5  | 2.40   | 0.24   |      |
| 5 | 4  | -5  | 2.63   | 0.18   |      |
| - | 5  | 4   | 5      | 2.08   | 0.19 |
| - | 5  | -4  | 5      | 2.16   | 0.15 |
| 5 | -4 | -5  | 2.17   | 0.18   |      |
| 5 | -4 | -5  | 2.40   | 0.19   |      |
| - | 5  | 4   | 4      | 6.89   | 0.31 |
| 5 | 4  | -4  | 7.35   | 0.39   |      |
| 5 | -4 | -4  | 7.02   | 0.33   |      |
| 5 | -4 | -4  | 6.87   | 0.34   |      |
| - | 5  | -4  | 4      | 6.74   | 0.29 |
| - | 5  | 4   | 3      | 30.04  | 1.08 |
| 5 | 4  | -3  | 26.69  | 1.27   |      |
| 5 | 4  | -3  | 30.71  | 1.02   |      |
| 5 | -4 | -3  | 30.40  | 1.04   |      |
| - | 5  | -4  | 3      | 29.69  | 1.07 |
| 5 | -4 | -3  | 30.25  | 1.26   |      |
| - | 5  | 4   | 2      | 110.95 | 3.81 |
| 5 | 4  | -2  | 110.79 | 3.62   |      |
| 5 | -4 | -2  | 99.69  | 4.46   |      |
| - | 5  | -4  | 2      | 107.26 | 3.80 |
| 5 | -4 | -2  | 105.21 | 3.63   |      |
| 5 | 4  | -1  | 79.42  | 2.60   |      |
| 5 | 4  | -1  | 81.34  | 3.24   |      |
| - | 5  | 4   | 1      | 65.01  | 2.75 |
| - | 5  | -4  | 1      | 78.64  | 2.75 |
| 5 | -4 | -1  | 79.57  | 2.63   |      |
| 5 | -4 | -1  | 78.09  | 3.23   |      |
| - | 5  | 4   | 0      | 3.13   | 0.22 |
| 5 | -4 | 0   | 2.39   | 0.24   |      |
| - | 5  | -4  | 0      | 2.56   | 0.17 |
| 5 | 4  | 1   | 106.03 | 4.61   |      |
| - | 5  | 4   | -1     | 112.94 | 3.93 |

|   |   |    |     |        |      |
|---|---|----|-----|--------|------|
| - | 5 | -4 | -1  | 107.14 | 3.92 |
|   | 5 | -4 | 1   | 113.59 | 4.60 |
| - | 5 | 4  | -2  | 57.31  | 1.99 |
|   | 5 | 4  | 2   | 54.61  | 2.33 |
| - | 5 | -4 | -2  | 49.02  | 1.98 |
|   | 5 | -4 | 2   | 58.76  | 2.33 |
| - | 5 | -4 | -2  | 55.22  | 1.87 |
|   | 5 | 4  | 3   | 13.21  | 0.67 |
| - | 5 | 4  | -3  | 14.55  | 0.53 |
| - | 5 | 4  | -3  | 14.18  | 0.58 |
|   | 5 | -4 | 3   | 14.59  | 0.65 |
| - | 5 | -4 | -3  | 13.78  | 0.55 |
| - | 5 | -4 | -3  | 13.85  | 0.50 |
| - | 5 | 4  | -4  | 0.33   | 0.14 |
| - | 5 | 4  | -4  | 0.24   | 0.15 |
|   | 5 | 4  | 4   | 0.18   | 0.19 |
| - | 5 | -4 | -4  | 0.25   | 0.10 |
| - | 5 | -4 | -4  | 0.39   | 0.15 |
| - | 5 | 4  | -5  | 14.91  | 0.65 |
| - | 5 | 4  | -5  | 16.12  | 0.61 |
|   | 5 | 4  | 5   | 16.50  | 0.77 |
| - | 5 | -4 | -5  | 16.07  | 0.58 |
| - | 5 | -4 | -5  | 15.63  | 0.65 |
| - | 5 | 4  | -6  | 30.17  | 1.09 |
| - | 5 | 4  | -6  | 28.23  | 1.15 |
|   | 5 | 4  | 6   | 31.02  | 1.34 |
| - | 5 | -4 | -6  | 30.52  | 1.14 |
|   | 5 | -4 | 6   | 30.66  | 1.34 |
| - | 5 | -4 | -6  | 30.34  | 1.06 |
| - | 5 | 4  | -7  | 0.87   | 0.20 |
| - | 5 | 4  | -7  | 0.35   | 0.21 |
|   | 5 | 4  | 7   | 1.13   | 0.25 |
|   | 5 | -4 | 7   | 0.61   | 0.27 |
| - | 5 | -4 | -7  | 0.83   | 0.17 |
| - | 5 | -4 | -7  | 0.65   | 0.20 |
| - | 5 | 4  | -8  | 1.91   | 0.24 |
|   | 5 | 4  | 8   | 2.72   | 0.31 |
|   | 5 | -4 | 8   | 2.12   | 0.33 |
| - | 5 | -4 | -8  | 2.27   | 0.25 |
| - | 5 | -4 | -8  | 2.34   | 0.22 |
|   | 5 | 4  | 9   | 1.28   | 0.31 |
| - | 5 | 4  | -9  | 0.98   | 0.23 |
| - | 5 | -4 | -9  | 0.78   | 0.21 |
| - | 5 | -4 | -9  | 1.24   | 0.26 |
|   | 5 | -4 | 9   | 0.72   | 0.32 |
| - | 5 | 4  | -10 | 0.01   | 0.27 |
|   | 5 | 4  | 10  | 0.53   | 0.34 |
|   | 5 | -4 | 10  | 0.22   | 0.35 |
| - | 5 | -4 | -10 | -0.26  | 0.22 |
| - | 5 | 4  | -11 | 4.27   | 0.45 |
|   | 5 | -4 | 11  | 4.14   | 0.54 |
| - | 5 | 4  | -12 | 3.57   | 0.38 |
|   | 5 | -4 | 12  | 4.51   | 0.58 |
|   | 5 | 5  | -14 | 5.63   | 0.54 |

|   |    |     |        |        |
|---|----|-----|--------|--------|
| 5 | -5 | -14 | 5.41   | 0.47   |
| - | 5  | -5  | 14     | 5.60   |
| 5 | 5  | -13 | 0.08   | 0.31   |
| 5 | -5 | -13 | -0.19  | 0.32   |
| - | 5  | -5  | 13     | 0.06   |
| 5 | 5  | -12 | 2.12   | 0.32   |
| 5 | 5  | -12 | 2.56   | 0.32   |
| 5 | -5 | -12 | 1.67   | 0.32   |
| 5 | 5  | -11 | 6.32   | 0.49   |
| 5 | 5  | -11 | 6.54   | 0.44   |
| 5 | -5 | -11 | 6.25   | 0.46   |
| 5 | 5  | -10 | 2.94   | 0.39   |
| 5 | 5  | -10 | 3.25   | 0.34   |
| 5 | -5 | -10 | 3.26   | 0.31   |
| 5 | 5  | -9  | 19.71  | 0.93   |
| 5 | 5  | -9  | 19.25  | 0.76   |
| 5 | -5 | -9  | 19.76  | 0.77   |
| 5 | 5  | -8  | 11.37  | 0.50   |
| 5 | 5  | -8  | 11.66  | 0.62   |
| 5 | -5 | -8  | 11.91  | 0.54   |
| 5 | 5  | -7  | 1.86   | 0.23   |
| 5 | 5  | -7  | 2.14   | 0.23   |
| 5 | 5  | -6  | 60.09  | 2.42   |
| 5 | 5  | -6  | 55.82  | 1.95   |
| 5 | -5 | -6  | 54.36  | 2.37   |
| 5 | 5  | -5  | 10.79  | 0.51   |
| - | 5  | 5   | 5      | 9.80   |
| 5 | 5  | -5  | 10.77  | 0.40   |
| 5 | -5 | -5  | 10.47  | 0.43   |
| - | 5  | -5  | 5      | 9.95   |
| 5 | -5 | -5  | 9.85   | 0.46   |
| 5 | 5  | -4  | 5.74   | 0.34   |
| - | 5  | 5   | 4      | 5.88   |
| - | 5  | -5  | 4      | 5.77   |
| 5 | -5 | -4  | 6.11   | 0.29   |
| - | 5  | 5   | 3      | 15.20  |
| 5 | 5  | -3  | 15.34  | 0.53   |
| - | 5  | -5  | 3      | 14.76  |
| 5 | -5 | -3  | 15.03  | 0.56   |
| 5 | -5 | -3  | 14.71  | 0.66   |
| 5 | 5  | -2  | 4.67   | 0.30   |
| - | 5  | 5   | 2      | 4.29   |
| 5 | 5  | -2  | 4.08   | 0.17   |
| 5 | -5 | -2  | 3.85   | 0.25   |
| 5 | -5 | -2  | 3.81   | 0.23   |
| - | 5  | -5  | 2      | 3.74   |
| 5 | 5  | -1  | 38.65  | 1.64   |
| - | 5  | -5  | 1      | 38.24  |
| 5 | -5 | -1  | 37.51  | 1.33   |
| 5 | -5 | -1  | 38.39  | 1.62   |
| - | 5  | 5   | 0      | 126.33 |
| 5 | 5  | 0   | 127.96 | 5.27   |
| 5 | -5 | 0   | 127.02 | 5.26   |
| - | 5  | -5  | 0      | 122.08 |

|   |   |    |     |       |      |
|---|---|----|-----|-------|------|
| - | 5 | 5  | -1  | 1.09  | 0.14 |
|   | 5 | 5  | 1   | 1.04  | 0.19 |
| - | 5 | -5 | -1  | 0.97  | 0.13 |
|   | 5 | -5 | 1   | 0.97  | 0.15 |
| - | 5 | 5  | -2  | 7.84  | 0.36 |
|   | 5 | 5  | 2   | 6.37  | 0.44 |
|   | 5 | -5 | 2   | 7.66  | 0.39 |
| - | 5 | -5 | -2  | 7.35  | 0.27 |
| - | 5 | 5  | -3  | 0.34  | 0.12 |
|   | 5 | 5  | 3   | -0.02 | 0.18 |
| - | 5 | 5  | -3  | 0.35  | 0.14 |
| - | 5 | -5 | -3  | 0.13  | 0.08 |
| - | 5 | -5 | -3  | 0.27  | 0.13 |
|   | 5 | -5 | 3   | 0.33  | 0.16 |
| - | 5 | 5  | -4  | 0.21  | 0.15 |
| - | 5 | 5  | -4  | 0.16  | 0.13 |
|   | 5 | 5  | 4   | 0.07  | 0.18 |
| - | 5 | -5 | -4  | 0.34  | 0.14 |
|   | 5 | -5 | 4   | 0.09  | 0.20 |
| - | 5 | -5 | -4  | 0.24  | 0.09 |
| - | 5 | 5  | -5  | 27.88 | 1.10 |
|   | 5 | 5  | 5   | 30.81 | 1.29 |
| - | 5 | 5  | -5  | 29.24 | 1.05 |
| - | 5 | -5 | -5  | 29.12 | 1.02 |
| - | 5 | -5 | -5  | 28.75 | 1.10 |
| - | 5 | 5  | -6  | 0.24  | 0.17 |
| - | 5 | 5  | -6  | 0.29  | 0.17 |
|   | 5 | 5  | 6   | 0.35  | 0.24 |
| - | 5 | -5 | -6  | 0.21  | 0.14 |
| - | 5 | -5 | -6  | 0.10  | 0.17 |
|   | 5 | -5 | 6   | 0.39  | 0.25 |
| - | 5 | 5  | -7  | 1.01  | 0.21 |
|   | 5 | 5  | 7   | 1.90  | 0.27 |
| - | 5 | 5  | -7  | 1.39  | 0.22 |
| - | 5 | -5 | -7  | 1.42  | 0.22 |
|   | 5 | -5 | 7   | 1.47  | 0.27 |
| - | 5 | -5 | -7  | 1.34  | 0.18 |
| - | 5 | 5  | -8  | 1.89  | 0.25 |
|   | 5 | 5  | 8   | 2.67  | 0.32 |
| - | 5 | -5 | -8  | 1.97  | 0.21 |
|   | 5 | -5 | 8   | 1.98  | 0.33 |
| - | 5 | -5 | -8  | 2.01  | 0.25 |
| - | 5 | 5  | -9  | 0.22  | 0.25 |
|   | 5 | 5  | 9   | 0.33  | 0.31 |
| - | 5 | -5 | -9  | -0.06 | 0.24 |
|   | 5 | -5 | 9   | 0.30  | 0.32 |
| - | 5 | 5  | -10 | 8.11  | 0.51 |
| - | 5 | -5 | -10 | 8.98  | 0.58 |
|   | 5 | -5 | 10  | 8.18  | 0.61 |
| - | 5 | 5  | -11 | 0.34  | 0.28 |
|   | 5 | -5 | 11  | 0.32  | 0.38 |
| - | 5 | 5  | -12 | 0.26  | 0.33 |
|   | 5 | -5 | 12  | 0.69  | 0.42 |
| - | 5 | -6 | 15  | 0.39  | 0.39 |

|   |    |     |       |       |
|---|----|-----|-------|-------|
| 5 | 6  | -14 | 0.08  | 0.36  |
| 5 | -6 | -14 | 0.01  | 0.32  |
| - | 5  | -6  | 14    | 0.56  |
| 5 | 6  | -13 | 5.87  | 0.50  |
| - | 5  | -6  | 13    | 5.41  |
| 5 | -6 | -13 | 5.06  | 0.50  |
| 5 | 6  | -12 | 2.32  | 0.34  |
| 5 | 6  | -12 | 2.06  | 0.31  |
| 5 | -6 | -12 | 1.62  | 0.30  |
| 5 | 6  | -11 | 15.96 | 0.83  |
| 5 | 6  | -11 | 16.25 | 0.70  |
| 5 | -6 | -11 | 16.45 | 0.72  |
| 5 | 6  | -10 | 7.41  | 0.43  |
| 5 | 6  | -10 | 7.23  | 0.51  |
| 5 | -6 | -10 | 7.37  | 0.47  |
| 5 | 6  | -9  | 1.22  | 0.21  |
| 5 | 6  | -9  | 1.05  | 0.26  |
| 5 | -6 | -9  | 0.92  | 0.24  |
| 5 | 6  | -8  | 5.16  | 0.33  |
| 5 | 6  | -8  | 5.31  | 0.39  |
| 5 | -6 | -8  | 5.02  | 0.35  |
| 5 | 6  | -7  | 31.32 | 1.38  |
| 5 | 6  | -7  | 31.80 | 1.12  |
| 5 | 6  | -6  | 5.93  | 0.31  |
| 5 | 6  | -6  | 6.26  | 0.39  |
| 5 | 6  | -5  | 0.48  | 0.11  |
| - | 5  | 6   | 5     | 0.34  |
| 5 | 6  | -5  | 0.34  | 0.15  |
| 5 | -6 | -5  | 0.33  | 0.08  |
| - | 5  | -6  | 5     | 0.32  |
| 5 | -6 | -5  | 0.05  | 0.11  |
| - | 5  | 6   | 4     | 6.69  |
| 5 | -6 | -4  | 7.29  | 0.33  |
| 5 | -6 | -4  | 7.10  | 0.32  |
| - | 5  | -6  | 4     | 6.66  |
| 5 | 6  | -3  | 5.77  | 0.35  |
| - | 5  | 6   | 3     | 5.53  |
| 5 | 6  | -3  | 5.68  | 0.23  |
| 5 | -6 | -3  | 5.24  | 0.29  |
| - | 5  | -6  | 3     | 5.27  |
| 5 | -6 | -3  | 6.48  | 0.31  |
| - | 5  | 6   | 2     | 1.08  |
| 5 | 6  | -2  | 0.95  | 0.09  |
| 5 | -6 | -2  | 1.42  | 0.13  |
| - | 5  | -6  | 2     | 0.81  |
| 5 | -6 | -2  | 0.94  | 0.14  |
| 5 | 6  | -1  | 12.59 | 0.58  |
| 5 | -6 | -1  | 11.71 | 0.55  |
| 5 | -6 | -1  | 12.14 | 0.47  |
| - | 5  | -6  | 1     | 12.17 |
| 5 | 6  | 0   | 3.51  | 0.30  |
| - | 5  | 6   | 0     | 3.15  |
| - | 5  | -6  | 0     | 2.90  |
| 5 | -6 | 0   | 2.76  | 0.24  |

|   |   |    |     |        |      |
|---|---|----|-----|--------|------|
| - | 5 | 6  | -1  | 61.40  | 2.27 |
|   | 5 | 6  | 1   | 64.67  | 2.67 |
| - | 5 | -6 | -1  | 62.68  | 2.26 |
|   | 5 | -6 | 1   | 63.03  | 2.65 |
|   | 5 | 6  | 2   | 99.00  | 4.28 |
| - | 5 | 6  | -2  | 102.05 | 3.64 |
|   | 5 | -6 | 2   | 104.08 | 4.27 |
| - | 5 | -6 | -2  | 101.90 | 3.44 |
| - | 5 | 6  | -3  | 48.85  | 1.64 |
|   | 5 | 6  | 3   | 45.59  | 2.03 |
| - | 5 | 6  | -3  | 47.17  | 1.73 |
| - | 5 | -6 | -3  | 46.78  | 1.61 |
|   | 5 | -6 | 3   | 48.46  | 2.02 |
|   | 5 | 6  | 4   | 0.15   | 0.20 |
| - | 5 | 6  | -4  | 0.35   | 0.14 |
| - | 5 | 6  | -4  | 0.49   | 0.15 |
| - | 5 | -6 | -4  | 0.36   | 0.10 |
| - | 5 | -6 | -4  | 0.37   | 0.15 |
|   | 5 | -6 | 4   | 0.27   | 0.19 |
| - | 5 | 6  | -5  | 4.04   | 0.29 |
|   | 5 | 6  | 5   | 4.04   | 0.36 |
| - | 5 | 6  | -5  | 3.80   | 0.30 |
| - | 5 | -6 | -5  | 3.53   | 0.23 |
| - | 5 | -6 | -5  | 3.41   | 0.28 |
|   | 5 | -6 | 5   | 3.79   | 0.38 |
| - | 5 | 6  | -6  | 0.24   | 0.16 |
| - | 5 | 6  | -6  | -0.02  | 0.17 |
|   | 5 | 6  | 6   | 0.17   | 0.21 |
| - | 5 | -6 | -6  | 0.15   | 0.13 |
| - | 5 | -6 | -6  | 0.21   | 0.17 |
|   | 5 | -6 | 6   | 0.06   | 0.26 |
| - | 5 | 6  | -7  | 1.51   | 0.21 |
|   | 5 | 6  | 7   | 1.92   | 0.27 |
| - | 5 | 6  | -7  | 1.43   | 0.21 |
|   | 5 | -6 | 7   | 1.40   | 0.28 |
| - | 5 | -6 | -7  | 1.64   | 0.23 |
|   | 5 | 6  | 8   | 1.78   | 0.28 |
| - | 5 | 6  | -8  | 1.04   | 0.24 |
| - | 5 | -6 | -8  | 0.78   | 0.24 |
|   | 5 | -6 | 8   | 1.42   | 0.33 |
| - | 5 | 6  | -9  | 0.08   | 0.26 |
|   | 5 | -6 | 9   | 0.33   | 0.34 |
| - | 5 | -6 | -9  | -0.07  | 0.25 |
| - | 5 | 6  | -10 | 2.46   | 0.32 |
|   | 5 | -6 | 10  | 2.35   | 0.36 |
| - | 5 | -6 | -10 | 2.56   | 0.32 |
| - | 5 | 6  | -11 | 2.11   | 0.34 |
|   | 5 | -6 | 11  | 2.22   | 0.41 |
| - | 5 | 6  | -12 | 1.29   | 0.36 |
|   | 5 | -6 | 12  | 1.26   | 0.40 |
|   | 5 | 7  | -14 | 6.02   | 0.57 |
| - | 5 | -7 | 14  | 5.14   | 0.61 |
|   | 5 | -7 | -14 | 5.42   | 0.48 |
|   | 5 | 7  | -13 | 0.52   | 0.30 |

|   |    |     |       |       |      |
|---|----|-----|-------|-------|------|
| 5 | -7 | -13 | 0.02  | 0.32  |      |
| 5 | 7  | -12 | 0.26  | 0.32  |      |
| 5 | 7  | -12 | 0.35  | 0.29  |      |
| 5 | -7 | -12 | -0.17 | 0.27  |      |
| 5 | 7  | -11 | 0.67  | 0.31  |      |
| 5 | 7  | -11 | 0.76  | 0.27  |      |
| 5 | -7 | -11 | 0.40  | 0.29  |      |
| 5 | 7  | -10 | 19.59 | 0.97  |      |
| 5 | 7  | -10 | 19.77 | 0.80  |      |
| 5 | -7 | -10 | 20.82 | 0.81  |      |
| 5 | 7  | -9  | 1.37  | 0.21  |      |
| 5 | 7  | -9  | 1.20  | 0.26  |      |
| 5 | -7 | -9  | 1.04  | 0.23  |      |
| 5 | 7  | -8  | 22.41 | 1.02  |      |
| 5 | 7  | -8  | 21.71 | 0.83  |      |
| 5 | -7 | -8  | 22.43 | 0.84  |      |
| 5 | 7  | -7  | 0.18  | 0.16  |      |
| 5 | 7  | -7  | -0.13 | 0.23  |      |
| 5 | -7 | -7  | 0.00  | 0.18  |      |
| 5 | 7  | -6  | 3.04  | 0.22  |      |
| 5 | 7  | -6  | 1.93  | 0.27  |      |
| 5 | 7  | -5  | 10.86 | 0.41  |      |
| - | 5  | 7   | 5     | 10.81 | 0.45 |
| - | 5  | -7  | 5     | 10.34 | 0.41 |
| - | 5  | 7   | 4     | 24.76 | 0.88 |
| 5 | 7  | -4  | 20.78 | 1.04  |      |
| 5 | -7 | -4  | 24.42 | 1.00  |      |
| - | 5  | -7  | 4     | 24.38 | 0.86 |
| 5 | 7  | -3  | 18.27 | 0.62  |      |
| 5 | 7  | -3  | 18.46 | 0.81  |      |
| - | 5  | 7   | 3     | 18.71 | 0.69 |
| 5 | -7 | -3  | 16.61 | 0.77  |      |
| 5 | -7 | -3  | 16.29 | 0.65  |      |
| - | 5  | -7  | 3     | 18.02 | 0.66 |
| 5 | 7  | -2  | 71.46 | 2.40  |      |
| 5 | 7  | -2  | 70.09 | 2.99  |      |
| - | 5  | 7   | 2     | 72.01 | 2.55 |
| 5 | -7 | -2  | 71.18 | 2.43  |      |
| - | 5  | -7  | 2     | 72.15 | 2.54 |
| 5 | -7 | -2  | 68.36 | 2.97  |      |
| 5 | 7  | -1  | 0.93  | 0.16  |      |
| - | 5  | 7   | 1     | 0.61  | 0.12 |
| - | 5  | -7  | 1     | 0.59  | 0.12 |
| 5 | -7 | -1  | 0.40  | 0.13  |      |
| 5 | -7 | -1  | 1.00  | 0.15  |      |
| 5 | 7  | 0   | 25.31 | 1.12  |      |
| - | 5  | 7   | 0     | 24.77 | 0.94 |
| - | 5  | -7  | 0     | 25.32 | 0.94 |
| 5 | -7 | 0   | 25.14 | 1.09  |      |
| 5 | 7  | 1   | 21.74 | 0.97  |      |
| - | 5  | 7   | -1    | 20.68 | 0.81 |
| - | 5  | -7  | -1    | 21.23 | 0.81 |
| 5 | -7 | 1   | 21.09 | 0.93  |      |
| - | 5  | 7   | -2    | 2.36  | 0.22 |

|   |    |     |       |       |
|---|----|-----|-------|-------|
| 5 | 7  | 2   | 2.25  | 0.24  |
| 5 | -7 | 2   | 2.75  | 0.25  |
| 5 | 7  | 3   | -0.05 | 0.19  |
| - | 5  | 7   | -3    | 0.65  |
| 5 | -7 | 3   | 0.44  | 0.18  |
| 5 | 7  | 4   | 27.88 | 1.22  |
| - | 5  | 7   | -4    | 26.36 |
| - | 5  | 7   | -4    | 26.28 |
| - | 5  | -7  | -4    | 28.24 |
| 5 | -7 | 4   | 27.06 | 1.21  |
| - | 5  | 7   | -5    | 2.88  |
| - | 5  | 7   | -5    | 3.22  |
| 5 | 7  | 5   | 3.33  | 0.36  |
| 5 | -7 | 5   | 3.70  | 0.38  |
| - | 5  | -7  | -5    | 3.54  |
| - | 5  | 7   | -6    | 14.23 |
| 5 | 7  | 6   | 17.29 | 0.77  |
| - | 5  | 7   | -6    | 14.08 |
| - | 5  | -7  | -6    | 14.41 |
| 5 | -7 | 6   | 14.66 | 0.76  |
| - | 5  | 7   | -7    | 1.08  |
| 5 | 7  | 7   | 0.91  | 0.24  |
| - | 5  | 7   | -7    | 0.85  |
| 5 | -7 | 7   | 0.79  | 0.30  |
| - | 5  | -7  | -7    | 0.69  |
| 5 | 7  | 8   | 11.19 | 0.60  |
| - | 5  | 7   | -8    | 9.72  |
| 5 | -7 | 8   | 9.71  | 0.60  |
| - | 5  | -7  | -8    | 10.03 |
| - | 5  | 7   | -9    | 8.05  |
| - | 5  | -7  | -9    | 8.05  |
| 5 | -7 | 9   | 7.51  | 0.55  |
| - | 5  | 7   | -10   | 1.06  |
| 5 | -7 | 10  | 1.12  | 0.38  |
| - | 5  | -7  | -10   | 0.93  |
| - | 5  | 7   | -11   | 0.05  |
| 5 | -7 | 11  | 0.19  | 0.40  |
| - | 5  | 7   | -12   | 0.78  |
| 5 | -7 | 12  | 1.08  | 0.44  |
| 5 | 8  | -14 | 0.00  | 0.37  |
| - | 5  | -8  | 14    | 0.19  |
| 5 | -8 | -14 | -0.04 | 0.36  |
| 5 | 8  | -13 | 0.99  | 0.34  |
| 5 | -8 | -13 | 0.24  | 0.34  |
| 5 | 8  | -12 | 0.72  | 0.34  |
| 5 | 8  | -12 | 0.35  | 0.31  |
| 5 | -8 | -12 | 0.16  | 0.28  |
| 5 | 8  | -11 | 8.46  | 0.60  |
| 5 | 8  | -11 | 8.80  | 0.51  |
| 5 | -8 | -11 | 8.22  | 0.49  |
| 5 | 8  | -10 | 0.41  | 0.27  |
| 5 | 8  | -10 | 0.41  | 0.24  |
| 5 | -8 | -10 | 0.26  | 0.27  |
| 5 | 8  | -9  | 10.63 | 0.51  |

|   |    |    |       |       |      |
|---|----|----|-------|-------|------|
| 5 | 8  | -9 | 10.70 | 0.63  |      |
| 5 | -8 | -9 | 11.41 | 0.55  |      |
| 5 | 8  | -8 | 0.65  | 0.27  |      |
| 5 | 8  | -8 | 0.85  | 0.19  |      |
| 5 | -8 | -8 | 0.58  | 0.23  |      |
| 5 | 8  | -7 | 9.21  | 0.42  |      |
| 5 | 8  | -7 | 9.15  | 0.56  |      |
| 5 | -8 | -7 | 9.26  | 0.47  |      |
| 5 | 8  | -6 | 0.77  | 0.15  |      |
| 5 | 8  | -6 | 0.57  | 0.18  |      |
| 5 | -8 | -6 | 1.01  | 0.19  |      |
| 5 | 8  | -5 | 0.15  | 0.12  |      |
| - | 5  | -8 | 5     | 0.13  | 0.09 |
| 5 | -8 | -5 | -0.02 | 0.05  |      |
| 5 | 8  | -4 | 1.10  | 0.19  |      |
| - | 5  | 8  | 4     | 1.01  | 0.14 |
| 5 | 8  | -4 | 0.78  | 0.09  |      |
| - | 5  | -8 | 4     | 1.30  | 0.16 |
| 5 | 8  | -3 | 70.00 | 2.37  |      |
| - | 5  | 8  | 3     | 71.34 | 2.51 |
| 5 | 8  | -3 | 71.82 | 2.95  |      |
| - | 5  | -8 | 3     | 71.94 | 2.49 |
| 5 | -8 | -3 | 63.41 | 2.91  |      |
| 5 | 8  | -2 | 23.98 | 1.05  |      |
| - | 5  | -8 | 2     | 24.03 | 0.87 |
| 5 | -8 | -2 | 22.17 | 1.01  |      |
| 5 | 8  | -1 | 17.23 | 0.79  |      |
| - | 5  | 8  | 1     | 16.86 | 0.66 |
| - | 5  | -8 | 1     | 16.85 | 0.65 |
| 5 | -8 | -1 | 16.38 | 0.75  |      |
| - | 5  | 8  | 0     | 0.08  | 0.13 |
| 5 | 8  | 0  | 0.32  | 0.18  |      |
| - | 5  | -8 | 0     | 0.11  | 0.13 |
| 5 | -8 | 0  | 0.00  | 0.15  |      |
| 5 | -8 | 0  | 0.14  | 0.12  |      |
| - | 5  | 8  | -1    | 0.70  | 0.15 |
| 5 | 8  | 1  | 0.88  | 0.19  |      |
| 5 | -8 | 1  | 0.59  | 0.17  |      |
| - | 5  | -8 | -1    | 0.57  | 0.14 |
| 5 | 8  | 2  | 0.29  | 0.19  |      |
| - | 5  | 8  | -2    | 0.11  | 0.13 |
| 5 | -8 | 2  | 0.07  | 0.18  |      |
| - | 5  | -8 | -2    | 0.05  | 0.06 |
| 5 | 8  | 3  | 14.77 | 0.77  |      |
| - | 5  | 8  | -3    | 15.84 | 0.63 |
| 5 | -8 | 3  | 15.75 | 0.72  |      |
| 5 | 8  | 4  | 0.33  | 0.21  |      |
| - | 5  | 8  | -4    | 0.90  | 0.17 |
| - | 5  | 8  | -4    | 0.92  | 0.17 |
| 5 | -8 | 4  | 0.77  | 0.21  |      |
| - | 5  | -8 | -4    | 0.89  | 0.19 |
| - | 5  | 8  | -5    | 2.55  | 0.26 |
| 5 | 8  | 5  | 2.78  | 0.29  |      |
| - | 5  | 8  | -5    | 3.39  | 0.31 |

|   |    |     |       |       |      |
|---|----|-----|-------|-------|------|
| 5 | -8 | 5   | 2.71  | 0.37  |      |
| - | 5  | -8  | -5    | 2.81  | 0.28 |
| - | 5  | 8   | -6    | 3.58  | 0.34 |
| 5 | 8  | 6   | 3.53  | 0.43  |      |
| - | 5  | 8   | -6    | 3.61  | 0.33 |
| 5 | -8 | 6   | 3.22  | 0.41  |      |
| - | 5  | -8  | -6    | 2.96  | 0.35 |
| 5 | 8  | 7   | 2.86  | 0.30  |      |
| - | 5  | 8   | -7    | 1.84  | 0.24 |
| 5 | -8 | 7   | 1.88  | 0.33  |      |
| - | 5  | -8  | -7    | 2.17  | 0.26 |
| - | 5  | 8   | -8    | -0.11 | 0.23 |
| 5 | -8 | 8   | -0.03 | 0.29  |      |
| - | 5  | -8  | -8    | 0.12  | 0.24 |
| - | 5  | 8   | -9    | 0.58  | 0.26 |
| 5 | -8 | 9   | 1.02  | 0.36  |      |
| - | 5  | -8  | -9    | 0.79  | 0.28 |
| - | 5  | 8   | -10   | 0.12  | 0.27 |
| 5 | -8 | 10  | 0.05  | 0.38  |      |
| - | 5  | -8  | -10   | -0.06 | 0.28 |
| - | 5  | 8   | -11   | 1.28  | 0.34 |
| 5 | -8 | 11  | 1.19  | 0.42  |      |
| 5 | 9  | -14 | 5.60  | 0.60  |      |
| - | 5  | -9  | 14    | 4.83  | 0.65 |
| 5 | 9  | -13 | 0.24  | 0.34  |      |
| 5 | -9 | -13 | -0.06 | 0.31  |      |
| 5 | 9  | -12 | 1.16  | 0.36  |      |
| 5 | 9  | -12 | 1.36  | 0.32  |      |
| 5 | -9 | -12 | 1.19  | 0.33  |      |
| 5 | 9  | -11 | 1.56  | 0.32  |      |
| 5 | 9  | -11 | 1.36  | 0.29  |      |
| 5 | -9 | -11 | 1.20  | 0.31  |      |
| 5 | 9  | -10 | 11.14 | 0.55  |      |
| 5 | 9  | -10 | 11.34 | 0.68  |      |
| 5 | -9 | -10 | 11.34 | 0.55  |      |
| 5 | 9  | -9  | 0.58  | 0.27  |      |
| 5 | 9  | -9  | 0.58  | 0.23  |      |
| 5 | -9 | -9  | 0.28  | 0.26  |      |
| 5 | 9  | -8  | 9.38  | 0.46  |      |
| 5 | 9  | -8  | 8.09  | 0.53  |      |
| 5 | -9 | -8  | 9.12  | 0.49  |      |
| 5 | 9  | -7  | 19.76 | 0.95  |      |
| 5 | 9  | -7  | 19.75 | 0.74  |      |
| 5 | -9 | -7  | 19.50 | 0.76  |      |
| 5 | 9  | -6  | 5.55  | 0.31  |      |
| 5 | 9  | -6  | 5.53  | 0.45  |      |
| 5 | -9 | -6  | 5.33  | 0.34  |      |
| 5 | 9  | -5  | 8.77  | 0.37  |      |
| 5 | 9  | -5  | 9.02  | 0.49  |      |
| 5 | -9 | -5  | 8.66  | 0.43  |      |
| - | 5  | -9  | 5     | 8.31  | 0.36 |
| 5 | 9  | -4  | 8.63  | 0.36  |      |
| 5 | 9  | -4  | 9.67  | 0.49  |      |
| - | 5  | 9   | 4     | 9.03  | 0.42 |

|   |   |    |     |       |      |
|---|---|----|-----|-------|------|
| - | 5 | -9 | 4   | 9.31  | 0.39 |
| - | 5 | 9  | 3   | 16.33 | 0.67 |
|   | 5 | 9  | -3  | 17.89 | 0.61 |
|   | 5 | 9  | -3  | 18.61 | 0.82 |
|   | 5 | -9 | -3  | 15.83 | 0.75 |
| - | 5 | -9 | 3   | 18.30 | 0.66 |
|   | 5 | 9  | -2  | 5.08  | 0.34 |
| - | 5 | -9 | 2   | 4.96  | 0.27 |
|   | 5 | -9 | -2  | 4.53  | 0.30 |
|   | 5 | 9  | -1  | 1.57  | 0.21 |
| - | 5 | 9  | 1   | 1.10  | 0.16 |
| - | 5 | -9 | 1   | 1.09  | 0.15 |
|   | 5 | -9 | -1  | 1.34  | 0.16 |
| - | 5 | 9  | 0   | 37.64 | 1.42 |
|   | 5 | 9  | 0   | 38.13 | 1.67 |
|   | 5 | -9 | 0   | 38.33 | 1.64 |
| - | 5 | -9 | 0   | 40.30 | 1.42 |
|   | 5 | 9  | 1   | 12.68 | 0.61 |
| - | 5 | 9  | -1  | 11.77 | 0.52 |
| - | 5 | -9 | -1  | 12.20 | 0.52 |
|   | 5 | -9 | 1   | 11.57 | 0.58 |
|   | 5 | 9  | 2   | 3.15  | 0.33 |
| - | 5 | 9  | -2  | 3.18  | 0.28 |
|   | 5 | -9 | 2   | 2.98  | 0.30 |
| - | 5 | -9 | -2  | 2.33  | 0.23 |
| - | 5 | 9  | -3  | 11.13 | 0.50 |
|   | 5 | 9  | 3   | 11.08 | 0.60 |
| - | 5 | -9 | -3  | 10.57 | 0.50 |
|   | 5 | -9 | 3   | 11.59 | 0.58 |
| - | 5 | 9  | -4  | 12.10 | 0.53 |
|   | 5 | 9  | 4   | 12.08 | 0.66 |
|   | 5 | -9 | 4   | 11.83 | 0.62 |
| - | 5 | -9 | -4  | 11.81 | 0.54 |
| - | 5 | 9  | -5  | 2.33  | 0.23 |
| - | 5 | 9  | -5  | 2.60  | 0.31 |
|   | 5 | 9  | 5   | 1.91  | 0.26 |
| - | 5 | -9 | -5  | 2.02  | 0.22 |
|   | 5 | -9 | 5   | 2.02  | 0.29 |
| - | 5 | 9  | -6  | 11.84 | 0.54 |
| - | 5 | 9  | -6  | 12.16 | 0.57 |
|   | 5 | 9  | 6   | 13.81 | 0.69 |
| - | 5 | -9 | -6  | 12.34 | 0.59 |
|   | 5 | -9 | 6   | 12.38 | 0.68 |
| - | 5 | 9  | -7  | 0.22  | 0.23 |
|   | 5 | -9 | 7   | 0.28  | 0.31 |
| - | 5 | -9 | -7  | 0.11  | 0.22 |
| - | 5 | 9  | -8  | 0.79  | 0.27 |
| - | 5 | -9 | -8  | 1.38  | 0.25 |
|   | 5 | -9 | 8   | 1.21  | 0.35 |
| - | 5 | 9  | -9  | -0.04 | 0.28 |
| - | 5 | -9 | -9  | -0.09 | 0.27 |
|   | 5 | -9 | 9   | 0.41  | 0.37 |
| - | 5 | 9  | -10 | 4.86  | 0.43 |
|   | 5 | -9 | 10  | 5.04  | 0.58 |

|   |   |     |     |       |      |
|---|---|-----|-----|-------|------|
| - | 5 | -9  | -10 | 5.13  | 0.49 |
| - | 5 | 9   | -11 | 1.80  | 0.36 |
|   | 5 | -9  | 11  | 1.65  | 0.45 |
|   | 5 | 10  | -14 | 0.46  | 0.40 |
|   | 5 | 10  | -13 | 3.53  | 0.41 |
|   | 5 | -10 | -13 | 2.98  | 0.39 |
|   | 5 | 10  | -12 | 0.39  | 0.31 |
|   | 5 | 10  | -12 | 0.39  | 0.38 |
|   | 5 | -10 | -12 | 0.09  | 0.32 |
|   | 5 | 10  | -11 | 7.55  | 0.61 |
|   | 5 | 10  | -11 | 8.12  | 0.51 |
|   | 5 | -10 | -11 | 7.54  | 0.49 |
|   | 5 | 10  | -10 | 1.15  | 0.34 |
|   | 5 | 10  | -10 | 0.69  | 0.26 |
|   | 5 | -10 | -10 | 0.83  | 0.29 |
|   | 5 | 10  | -9  | 0.36  | 0.22 |
|   | 5 | 10  | -9  | 0.22  | 0.30 |
|   | 5 | -10 | -9  | 0.23  | 0.24 |
|   | 5 | 10  | -8  | 10.41 | 0.48 |
|   | 5 | 10  | -8  | 9.80  | 0.62 |
|   | 5 | -10 | -8  | 9.63  | 0.52 |
|   | 5 | 10  | -7  | 39.70 | 1.76 |
|   | 5 | 10  | -7  | 40.23 | 1.41 |
|   | 5 | -10 | -7  | 39.39 | 1.43 |
|   | 5 | 10  | -6  | 1.86  | 0.18 |
|   | 5 | 10  | -6  | 1.77  | 0.28 |
|   | 5 | -10 | -6  | 1.72  | 0.21 |
|   | 5 | 10  | -5  | 3.09  | 0.38 |
|   | 5 | 10  | -5  | 2.26  | 0.21 |
|   | 5 | -10 | -5  | 2.23  | 0.23 |
| - | 5 | -10 | 5   | 2.21  | 0.20 |
|   | 5 | 10  | -4  | 6.89  | 0.45 |
|   | 5 | 10  | -4  | 6.28  | 0.29 |
| - | 5 | -10 | 4   | 6.26  | 0.31 |
|   | 5 | -10 | -4  | 7.14  | 0.38 |
| - | 5 | 10  | 3   | 2.43  | 0.22 |
|   | 5 | 10  | -3  | 3.21  | 0.31 |
|   | 5 | -10 | -3  | 2.55  | 0.25 |
| - | 5 | -10 | 3   | 2.73  | 0.22 |
|   | 5 | 10  | -2  | 9.05  | 0.49 |
| - | 5 | -10 | 2   | 9.41  | 0.40 |
|   | 5 | -10 | -2  | 8.84  | 0.45 |
| - | 5 | 10  | 1   | 2.18  | 0.24 |
|   | 5 | 10  | -1  | 2.76  | 0.31 |
|   | 5 | -10 | -1  | 2.11  | 0.23 |
| - | 5 | -10 | 1   | 2.22  | 0.21 |
| - | 5 | 10  | 0   | 5.19  | 0.34 |
|   | 5 | 10  | 0   | 5.56  | 0.39 |
| - | 5 | -10 | 0   | 5.24  | 0.29 |
|   | 5 | -10 | 0   | 5.26  | 0.34 |
| - | 5 | 10  | -1  | 71.02 | 2.64 |
|   | 5 | 10  | 1   | 72.78 | 3.10 |
|   | 5 | -10 | 1   | 74.36 | 3.09 |
| - | 5 | -10 | -1  | 75.04 | 2.64 |

|   |     |     |       |       |      |
|---|-----|-----|-------|-------|------|
| 5 | 10  | 2   | 3.06  | 0.32  |      |
| - | 5   | 10  | -2    | 3.00  | 0.29 |
| 5 | -10 | 2   | 2.34  | 0.30  |      |
| - | 5   | -10 | -2    | 2.67  | 0.29 |
| - | 5   | 10  | -3    | 41.45 | 1.55 |
| 5 | 10  | 3   | 42.98 | 1.82  |      |
| - | 5   | -10 | -3    | 41.70 | 1.55 |
| 5 | -10 | 3   | 42.36 | 1.82  |      |
| 5 | 10  | 4   | 3.53  | 0.37  |      |
| - | 5   | 10  | -4    | 3.63  | 0.34 |
| 5 | -10 | 4   | 3.33  | 0.33  |      |
| - | 5   | -10 | -4    | 3.45  | 0.30 |
| 5 | 10  | 5   | 1.29  | 0.26  |      |
| - | 5   | 10  | -5    | 1.49  | 0.21 |
| - | 5   | 10  | -5    | 1.56  | 0.20 |
| 5 | -10 | 5   | 1.65  | 0.29  |      |
| - | 5   | -10 | -5    | 1.45  | 0.22 |
| - | 5   | 10  | -6    | 1.08  | 0.24 |
| - | 5   | 10  | -6    | 0.99  | 0.20 |
| - | 5   | -10 | -6    | 0.89  | 0.23 |
| 5 | -10 | 6   | 0.92  | 0.30  |      |
| - | 5   | 10  | -7    | 3.02  | 0.33 |
| - | 5   | -10 | -7    | 3.45  | 0.40 |
| 5 | -10 | 7   | 3.41  | 0.45  |      |
| - | 5   | 10  | -8    | 1.88  | 0.27 |
| - | 5   | -10 | -8    | 1.76  | 0.29 |
| 5 | -10 | 8   | 1.90  | 0.34  |      |
| - | 5   | 10  | -9    | 1.46  | 0.31 |
| - | 5   | -10 | -9    | 1.38  | 0.30 |
| 5 | -10 | 9   | 1.48  | 0.40  |      |
| - | 5   | 10  | -10   | 0.09  | 0.32 |
| - | 5   | -10 | -10   | -0.05 | 0.31 |
| 5 | -10 | 10  | 0.47  | 0.38  |      |
| - | 5   | 10  | -11   | 4.74  | 0.52 |
| 5 | -10 | 11  | 3.99  | 0.55  |      |
| 5 | 11  | -13 | 1.89  | 0.39  |      |
| 5 | -11 | -13 | 1.28  | 0.34  |      |
| 5 | 11  | -12 | 0.10  | 0.38  |      |
| 5 | 11  | -12 | 0.32  | 0.33  |      |
| 5 | -11 | -12 | -0.46 | 0.33  |      |
| 5 | 11  | -11 | 2.58  | 0.41  |      |
| 5 | 11  | -11 | 2.40  | 0.33  |      |
| 5 | -11 | -11 | 2.48  | 0.32  |      |
| 5 | 11  | -10 | 4.76  | 0.53  |      |
| 5 | 11  | -10 | 5.05  | 0.44  |      |
| 5 | -11 | -10 | 4.87  | 0.45  |      |
| 5 | 11  | -9  | 3.63  | 0.48  |      |
| 5 | 11  | -9  | 3.78  | 0.37  |      |
| 5 | -11 | -9  | 3.71  | 0.37  |      |
| 5 | 11  | -8  | 0.22  | 0.22  |      |
| 5 | 11  | -8  | 0.40  | 0.30  |      |
| 5 | -11 | -8  | -0.06 | 0.25  |      |
| 5 | 11  | -7  | 3.70  | 0.30  |      |
| 5 | 11  | -7  | 4.00  | 0.41  |      |

|   |     |     |       |       |      |
|---|-----|-----|-------|-------|------|
| 5 | -11 | -7  | 3.86  | 0.38  |      |
| 5 | 11  | -6  | 10.77 | 0.63  |      |
| 5 | 11  | -6  | 10.56 | 0.46  |      |
| 5 | -11 | -6  | 10.68 | 0.52  |      |
| 5 | 11  | -5  | 4.07  | 0.42  |      |
| 5 | -11 | -5  | 4.16  | 0.35  |      |
| 5 | 11  | -4  | 12.23 | 0.63  |      |
| 5 | -11 | -4  | 11.59 | 0.50  |      |
| - | 5   | -11 | 4     | 11.24 | 0.48 |
| - | 5   | 11  | 3     | 0.75  | 0.18 |
| 5 | 11  | -3  | 1.04  | 0.21  |      |
| - | 5   | -11 | 3     | 0.79  | 0.14 |
| 5 | -11 | -3  | 1.63  | 0.19  |      |
| 5 | 11  | -2  | 1.40  | 0.21  |      |
| - | 5   | 11  | 2     | 1.05  | 0.18 |
| 5 | -11 | -2  | 1.16  | 0.19  |      |
| - | 5   | -11 | 2     | 1.32  | 0.16 |
| - | 5   | 11  | 1     | 14.96 | 0.64 |
| 5 | 11  | -1  | 15.23 | 0.75  |      |
| 5 | -11 | -1  | 16.09 | 0.64  |      |
| - | 5   | -11 | 1     | 15.89 | 0.63 |
| 5 | -11 | -1  | 15.51 | 0.70  |      |
| 5 | 11  | 0   | 17.79 | 0.85  |      |
| - | 5   | 11  | 0     | 17.98 | 0.73 |
| - | 5   | -11 | 0     | 18.61 | 0.72 |
| 5 | -11 | 0   | 18.31 | 0.72  |      |
| 5 | -11 | 0   | 18.26 | 0.82  |      |
| - | 5   | 11  | -1    | 8.19  | 0.42 |
| 5 | 11  | 1   | 8.33  | 0.48  |      |
| - | 5   | -11 | -1    | 7.26  | 0.39 |
| 5 | -11 | 1   | 8.05  | 0.45  |      |
| 5 | 11  | 2   | 0.23  | 0.20  |      |
| - | 5   | 11  | -2    | 0.22  | 0.18 |
| - | 5   | -11 | -2    | 0.18  | 0.17 |
| 5 | -11 | 2   | 0.10  | 0.22  |      |
| 5 | 11  | 3   | 17.68 | 0.83  |      |
| - | 5   | 11  | -3    | 17.04 | 0.71 |
| 5 | -11 | 3   | 17.26 | 0.82  |      |
| - | 5   | -11 | -3    | 17.70 | 0.72 |
| 5 | 11  | 4   | 2.76  | 0.39  |      |
| - | 5   | 11  | -4    | 3.50  | 0.32 |
| 5 | -11 | 4   | 3.33  | 0.37  |      |
| - | 5   | -11 | -4    | 3.40  | 0.35 |
| - | 5   | 11  | -5    | 6.39  | 0.39 |
| - | 5   | -11 | -5    | 6.55  | 0.39 |
| 5 | -11 | 5   | 6.31  | 0.48  |      |
| - | 5   | 11  | -6    | 3.84  | 0.33 |
| - | 5   | -11 | -6    | 3.85  | 0.39 |
| 5 | -11 | 6   | 3.88  | 0.39  |      |
| - | 5   | 11  | -7    | 0.29  | 0.26 |
| - | 5   | -11 | -7    | 0.04  | 0.26 |
| 5 | -11 | 7   | 0.24  | 0.33  |      |
| - | 5   | 11  | -8    | 0.10  | 0.28 |
| 5 | -11 | 8   | 0.18  | 0.32  |      |

|   |   |     |     |       |      |
|---|---|-----|-----|-------|------|
| - | 5 | -11 | -8  | 0.10  | 0.28 |
| - | 5 | 11  | -9  | 0.07  | 0.28 |
| - | 5 | -11 | -9  | -0.10 | 0.30 |
|   | 5 | -11 | 9   | -0.08 | 0.39 |
| - | 5 | 11  | -10 | 2.08  | 0.36 |
| - | 5 | -11 | -10 | 2.03  | 0.35 |
|   | 5 | -11 | 10  | 1.91  | 0.42 |
| - | 5 | -11 | -11 | 0.45  | 0.35 |
|   | 5 | 12  | -13 | 0.31  | 0.37 |
|   | 5 | -12 | -13 | -0.03 | 0.36 |
|   | 5 | 12  | -12 | 1.87  | 0.36 |
|   | 5 | 12  | -12 | 1.21  | 0.39 |
|   | 5 | -12 | -12 | 1.15  | 0.35 |
|   | 5 | 12  | -11 | 3.13  | 0.35 |
|   | 5 | 12  | -11 | 3.34  | 0.44 |
|   | 5 | -12 | -11 | 3.25  | 0.36 |
|   | 5 | 12  | -10 | 0.47  | 0.27 |
|   | 5 | 12  | -10 | 0.35  | 0.33 |
|   | 5 | -12 | -10 | -0.09 | 0.29 |
|   | 5 | 12  | -9  | 0.06  | 0.34 |
|   | 5 | 12  | -9  | 0.21  | 0.24 |
|   | 5 | -12 | -9  | -0.07 | 0.27 |
|   | 5 | 12  | -8  | 0.59  | 0.32 |
|   | 5 | 12  | -8  | 0.20  | 0.22 |
|   | 5 | -12 | -8  | 0.19  | 0.26 |
|   | 5 | 12  | -7  | 12.68 | 0.73 |
|   | 5 | -12 | -7  | 13.06 | 0.60 |
|   | 5 | 12  | -6  | 15.28 | 0.81 |
|   | 5 | -12 | -6  | 15.80 | 0.66 |
|   | 5 | 12  | -5  | 0.19  | 0.26 |
|   | 5 | -12 | -5  | 0.33  | 0.22 |
|   | 5 | 12  | -4  | 4.04  | 0.37 |
| - | 5 | -12 | 4   | 3.53  | 0.25 |
|   | 5 | -12 | -4  | 4.25  | 0.35 |
|   | 5 | 12  | -3  | 1.73  | 0.26 |
|   | 5 | -12 | -3  | 1.86  | 0.23 |
| - | 5 | -12 | 3   | 1.69  | 0.17 |
|   | 5 | 12  | -2  | 10.88 | 0.59 |
| - | 5 | 12  | 2   | 10.35 | 0.48 |
| - | 5 | -12 | 2   | 11.21 | 0.47 |
|   | 5 | -12 | -2  | 10.69 | 0.48 |
| - | 5 | 12  | 1   | 14.23 | 0.60 |
|   | 5 | 12  | -1  | 14.57 | 0.71 |
|   | 5 | -12 | -1  | 14.42 | 0.59 |
| - | 5 | -12 | 1   | 14.56 | 0.59 |
|   | 5 | -12 | -1  | 13.97 | 0.65 |
| - | 5 | 12  | 0   | 0.61  | 0.19 |
|   | 5 | 12  | 0   | 0.71  | 0.21 |
|   | 5 | -12 | 0   | 0.44  | 0.18 |
| - | 5 | -12 | 0   | 0.37  | 0.18 |
|   | 5 | -12 | 0   | 0.43  | 0.19 |
| - | 5 | 12  | -1  | 1.04  | 0.19 |
|   | 5 | 12  | 1   | 1.32  | 0.23 |
| - | 5 | -12 | -1  | 1.14  | 0.20 |

|   |     |     |      |      |      |
|---|-----|-----|------|------|------|
| 5 | -12 | 1   | 1.02 | 0.21 |      |
| - | 5   | 12  | -2   | 1.78 | 0.22 |
| 5 | 12  | 2   | 1.66 | 0.25 |      |
| 5 | -12 | 2   | 1.61 | 0.25 |      |
| - | 5   | -12 | -2   | 1.94 | 0.23 |
| 5 | 12  | 3   | 7.45 | 0.49 |      |
| - | 5   | 12  | -3   | 7.16 | 0.42 |
| 5 | -12 | 3   | 7.23 | 0.47 |      |
| - | 5   | -12 | -3   | 7.33 | 0.40 |
| - | 5   | 12  | -4   | 0.34 | 0.20 |
| - | 5   | -12 | -4   | 0.38 | 0.23 |
| 5 | -12 | 4   | 0.13 | 0.25 |      |
| - | 5   | 12  | -5   | 0.87 | 0.22 |
| - | 5   | -12 | -5   | 0.92 | 0.23 |
| 5 | -12 | 5   | 0.79 | 0.29 |      |
| 5 | -12 | 6   | 3.77 | 0.45 |      |
| - | 5   | -12 | -6   | 3.36 | 0.35 |
| - | 5   | 12  | -7   | 6.67 | 0.43 |
| - | 5   | -12 | -7   | 7.45 | 0.50 |
| 5 | -12 | 7   | 7.40 | 0.57 |      |
| - | 5   | 12  | -8   | 0.55 | 0.29 |
| - | 5   | -12 | -8   | 0.32 | 0.30 |
| 5 | -12 | 8   | 0.10 | 0.38 |      |
| - | 5   | 12  | -9   | 2.45 | 0.35 |
| - | 5   | -12 | -9   | 2.19 | 0.35 |
| 5 | -12 | 9   | 2.74 | 0.44 |      |
| - | 5   | 12  | -10  | 0.71 | 0.35 |
| - | 5   | -12 | -10  | 0.57 | 0.34 |
| 5 | -12 | 10  | 0.94 | 0.46 |      |
| - | 5   | -12 | -11  | 5.68 | 0.59 |
| 5 | 13  | -12 | 2.99 | 0.44 |      |
| 5 | -13 | -12 | 2.76 | 0.38 |      |
| 5 | 13  | -11 | 0.86 | 0.40 |      |
| 5 | -13 | -11 | 0.38 | 0.30 |      |
| 5 | 13  | -10 | 3.02 | 0.43 |      |
| 5 | -13 | -10 | 2.43 | 0.30 |      |
| 5 | -13 | -10 | 2.85 | 0.35 |      |
| 5 | 13  | -9  | 0.84 | 0.36 |      |
| 5 | -13 | -9  | 0.84 | 0.27 |      |
| 5 | 13  | -8  | 5.16 | 0.47 |      |
| 5 | -13 | -8  | 5.49 | 0.45 |      |
| 5 | 13  | -7  | 2.60 | 0.36 |      |
| 5 | -13 | -7  | 2.65 | 0.29 |      |
| 5 | 13  | -6  | 1.76 | 0.33 |      |
| 5 | -13 | -6  | 1.77 | 0.26 |      |
| 5 | 13  | -5  | 2.31 | 0.32 |      |
| 5 | -13 | -5  | 2.70 | 0.27 |      |
| 5 | 13  | -4  | 2.29 | 0.31 |      |
| - | 5   | -13 | 4    | 2.21 | 0.26 |
| 5 | -13 | -4  | 2.16 | 0.23 |      |
| 5 | 13  | -3  | 6.93 | 0.48 |      |
| - | 5   | -13 | 3    | 6.57 | 0.37 |
| 5 | -13 | -3  | 6.38 | 0.38 |      |
| 5 | 13  | -2  | 0.51 | 0.23 |      |

|   |   |     |     |       |      |
|---|---|-----|-----|-------|------|
| - | 5 | -13 | 2   | 0.22  | 0.17 |
|   | 5 | -13 | -2  | 0.34  | 0.22 |
|   | 5 | 13  | -1  | 0.57  | 0.22 |
| - | 5 | 13  | 1   | 0.29  | 0.18 |
|   | 5 | -13 | -1  | 0.21  | 0.21 |
| - | 5 | -13 | 1   | 0.44  | 0.18 |
| - | 5 | 13  | 0   | 7.10  | 0.40 |
|   | 5 | 13  | 0   | 7.63  | 0.47 |
|   | 5 | -13 | 0   | 8.04  | 0.44 |
|   | 5 | -13 | 0   | 7.88  | 0.43 |
| - | 5 | -13 | 0   | 6.93  | 0.40 |
| - | 5 | 13  | -1  | 1.06  | 0.21 |
|   | 5 | 13  | 1   | 1.31  | 0.24 |
| - | 5 | -13 | -1  | 1.51  | 0.20 |
|   | 5 | -13 | 1   | 1.29  | 0.23 |
|   | 5 | -13 | 1   | 1.47  | 0.24 |
| - | 5 | 13  | -2  | 1.59  | 0.22 |
|   | 5 | 13  | 2   | 1.90  | 0.26 |
| - | 5 | -13 | -2  | 1.67  | 0.22 |
|   | 5 | -13 | 2   | 1.69  | 0.25 |
| - | 5 | 13  | -3  | 1.33  | 0.22 |
| - | 5 | -13 | -3  | 1.34  | 0.24 |
|   | 5 | -13 | 3   | 1.09  | 0.26 |
| - | 5 | 13  | -4  | 6.39  | 0.41 |
|   | 5 | -13 | 4   | 6.19  | 0.47 |
| - | 5 | -13 | -4  | 6.67  | 0.43 |
| - | 5 | 13  | -5  | 1.19  | 0.24 |
|   | 5 | -13 | 5   | 1.15  | 0.31 |
| - | 5 | -13 | -5  | 1.03  | 0.24 |
| - | 5 | -13 | -6  | 4.97  | 0.43 |
|   | 5 | -13 | 6   | 4.31  | 0.48 |
| - | 5 | -13 | -7  | 0.76  | 0.29 |
|   | 5 | -13 | 7   | 0.92  | 0.36 |
| - | 5 | -13 | -8  | 0.03  | 0.30 |
|   | 5 | -13 | 8   | 0.12  | 0.38 |
| - | 5 | 13  | -9  | 0.25  | 0.33 |
| - | 5 | -13 | -9  | 0.32  | 0.33 |
|   | 5 | -13 | 9   | 0.61  | 0.43 |
| - | 5 | -13 | -10 | 0.74  | 0.36 |
|   | 5 | -14 | -12 | 1.04  | 0.36 |
|   | 5 | 14  | -11 | 0.37  | 0.42 |
|   | 5 | -14 | -11 | 0.47  | 0.33 |
|   | 5 | 14  | -10 | 1.26  | 0.41 |
|   | 5 | -14 | -10 | 0.65  | 0.27 |
|   | 5 | -14 | -10 | 0.89  | 0.33 |
|   | 5 | 14  | -9  | 0.51  | 0.37 |
|   | 5 | -14 | -9  | 0.47  | 0.30 |
|   | 5 | 14  | -8  | 4.90  | 0.54 |
|   | 5 | -14 | -8  | 4.46  | 0.45 |
|   | 5 | 14  | -7  | 9.96  | 0.66 |
|   | 5 | -14 | -7  | 10.72 | 0.56 |
|   | 5 | 14  | -6  | 14.49 | 0.81 |
|   | 5 | -14 | -6  | 15.61 | 0.67 |
|   | 5 | 14  | -5  | 0.30  | 0.30 |

|   |     |     |       |       |      |
|---|-----|-----|-------|-------|------|
| 5 | -14 | -5  | 0.23  | 0.24  |      |
| 5 | 14  | -4  | 0.48  | 0.27  |      |
| - | 5   | -14 | 4     | 0.12  | 0.17 |
| 5 | -14 | -4  | 0.57  | 0.24  |      |
| 5 | 14  | -3  | 0.22  | 0.26  |      |
| 5 | -14 | -3  | 0.36  | 0.23  |      |
| - | 5   | -14 | 3     | 0.25  | 0.17 |
| 5 | 14  | -2  | 8.51  | 0.54  |      |
| 5 | -14 | -2  | 8.97  | 0.45  |      |
| - | 5   | -14 | 2     | 8.72  | 0.43 |
| 5 | 14  | -1  | 0.44  | 0.24  |      |
| 5 | -14 | -1  | 0.32  | 0.23  |      |
| - | 5   | -14 | 1     | 0.32  | 0.19 |
| 5 | 14  | 0   | 2.57  | 0.35  |      |
| - | 5   | 14  | 0     | 2.25  | 0.25 |
| - | 5   | -14 | 0     | 2.08  | 0.23 |
| 5 | -14 | 0   | 2.02  | 0.26  |      |
| 5 | 14  | 1   | 4.82  | 0.43  |      |
| - | 5   | 14  | -1    | 4.69  | 0.39 |
| - | 5   | -14 | -1    | 4.63  | 0.33 |
| 5 | -14 | 1   | 4.93  | 0.38  |      |
| 5 | -14 | 1   | 4.75  | 0.37  |      |
| 5 | 14  | 2   | 23.23 | 1.07  |      |
| - | 5   | 14  | -2    | 23.00 | 0.94 |
| - | 5   | -14 | -2    | 24.17 | 0.94 |
| 5 | -14 | 2   | 23.85 | 1.07  |      |
| - | 5   | 14  | -3    | 5.40  | 0.40 |
| - | 5   | -14 | -3    | 5.35  | 0.40 |
| 5 | -14 | 3   | 5.45  | 0.46  |      |
| - | 5   | 14  | -4    | 0.85  | 0.22 |
| - | 5   | -14 | -4    | 1.25  | 0.26 |
| 5 | -14 | 4   | 0.94  | 0.30  |      |
| - | 5   | 14  | -5    | 0.24  | 0.22 |
| 5 | -14 | 5   | 0.19  | 0.31  |      |
| - | 5   | -14 | -5    | 0.01  | 0.23 |
| 5 | -14 | 6   | 1.87  | 0.36  |      |
| - | 5   | -14 | -6    | 1.77  | 0.30 |
| - | 5   | -14 | -7    | 2.42  | 0.33 |
| 5 | -14 | 7   | 2.58  | 0.41  |      |
| 5 | -14 | 8   | 0.23  | 0.40  |      |
| - | 5   | -14 | -8    | 0.23  | 0.29 |
| 5 | -14 | 9   | 0.21  | 0.44  |      |
| - | 5   | -14 | -9    | 0.22  | 0.34 |
| 5 | 15  | -11 | 0.51  | 0.43  |      |
| 5 | -15 | -11 | 0.26  | 0.33  |      |
| 5 | 15  | -10 | 0.61  | 0.41  |      |
| 5 | -15 | -10 | 0.39  | 0.33  |      |
| 5 | -15 | -10 | -0.15 | 0.27  |      |
| 5 | 15  | -9  | 1.16  | 0.40  |      |
| 5 | -15 | -9  | 1.13  | 0.33  |      |
| 5 | 15  | -8  | 0.34  | 0.34  |      |
| 5 | -15 | -8  | 0.43  | 0.29  |      |
| 5 | 15  | -7  | 0.27  | 0.34  |      |
| 5 | -15 | -7  | 0.09  | 0.28  |      |

|   |     |     |      |      |      |
|---|-----|-----|------|------|------|
| 5 | 15  | -6  | 0.71 | 0.33 |      |
| 5 | -15 | -6  | 0.82 | 0.27 |      |
| 5 | 15  | -5  | 0.43 | 0.31 |      |
| 5 | -15 | -5  | 0.41 | 0.26 |      |
| 5 | 15  | -4  | 5.51 | 0.49 |      |
| 5 | -15 | -4  | 5.70 | 0.38 |      |
| 5 | 15  | -3  | 4.15 | 0.44 |      |
| 5 | -15 | -3  | 4.00 | 0.39 |      |
| - | 5   | -15 | 3    | 3.95 | 0.32 |
| 5 | 15  | -2  | 5.31 | 0.49 |      |
| - | 5   | -15 | 2    | 5.44 | 0.39 |
| 5 | -15 | -2  | 5.44 | 0.38 |      |
| 5 | 15  | -1  | 0.80 | 0.25 |      |
| 5 | -15 | -1  | 0.74 | 0.25 |      |
| - | 5   | -15 | 1    | 0.81 | 0.21 |
| 5 | 15  | 0   | 0.51 | 0.24 |      |
| 5 | -15 | 0   | 0.42 | 0.23 |      |
| - | 5   | -15 | 0    | 0.36 | 0.20 |
| 5 | 15  | 1   | 3.59 | 0.42 |      |
| - | 5   | -15 | -1   | 4.30 | 0.36 |
| 5 | -15 | 1   | 3.92 | 0.36 |      |
| - | 5   | 15  | -2   | 1.18 | 0.24 |
| 5 | -15 | 2   | 1.27 | 0.28 |      |
| - | 5   | -15 | -2   | 1.11 | 0.23 |
| - | 5   | 15  | -3   | 0.52 | 0.23 |
| - | 5   | -15 | -3   | 0.14 | 0.25 |
| 5 | -15 | 3   | 0.65 | 0.27 |      |
| - | 5   | 15  | -4   | 0.18 | 0.23 |
| - | 5   | -15 | -4   | 0.53 | 0.26 |
| 5 | -15 | 4   | 0.37 | 0.32 |      |
| 5 | -15 | 5   | 0.28 | 0.33 |      |
| - | 5   | -15 | -5   | 0.02 | 0.25 |
| - | 5   | -15 | -6   | 0.21 | 0.29 |
| 5 | -15 | 6   | 0.50 | 0.36 |      |
| 5 | -15 | 7   | 0.84 | 0.40 |      |
| - | 5   | -15 | -7   | 0.78 | 0.28 |
| - | 5   | -15 | -8   | 0.22 | 0.33 |
| 5 | -15 | 8   | 0.35 | 0.42 |      |
| - | 5   | -15 | -9   | 1.34 | 0.37 |
| 5 | -16 | -11 | 0.12 | 0.35 |      |
| 5 | -16 | -11 | 0.09 | 0.31 |      |
| 5 | 16  | -10 | 0.44 | 0.43 |      |
| 5 | -16 | -10 | 0.20 | 0.33 |      |
| 5 | -16 | -10 | 0.35 | 0.30 |      |
| 5 | 16  | -9  | 0.70 | 0.40 |      |
| 5 | -16 | -9  | 0.38 | 0.33 |      |
| 5 | 16  | -8  | 5.00 | 0.59 |      |
| 5 | -16 | -8  | 5.28 | 0.44 |      |
| 5 | 16  | -7  | 1.53 | 0.38 |      |
| 5 | -16 | -7  | 1.58 | 0.31 |      |
| 5 | 16  | -6  | 1.43 | 0.35 |      |
| 5 | -16 | -6  | 1.38 | 0.30 |      |
| 5 | 16  | -5  | 0.70 | 0.32 |      |
| 5 | -16 | -5  | 0.69 | 0.28 |      |

|   |     |     |       |            |
|---|-----|-----|-------|------------|
| 5 | 16  | -4  | 1.54  | 0.33       |
| 5 | -16 | -4  | 1.52  | 0.27       |
| 5 | 16  | -3  | 0.07  | 0.27       |
| - | 5   | -16 | 3     | 0.24 0.20  |
| 5 | -16 | -3  | 0.25  | 0.23       |
| 5 | 16  | -2  | 11.75 | 0.67       |
| 5 | -16 | -2  | 11.49 | 0.54       |
| - | 5   | -16 | 2     | 11.88 0.55 |
| 5 | 16  | -1  | 0.63  | 0.28       |
| 5 | -16 | -1  | 0.73  | 0.26       |
| - | 5   | -16 | 1     | 0.76 0.23  |
| 5 | 16  | 0   | 1.69  | 0.27       |
| 5 | -16 | 0   | 1.43  | 0.26       |
| - | 5   | -16 | 0     | 1.24 0.24  |
| - | 5   | -16 | -1    | 1.37 0.25  |
| 5 | -16 | 1   | 1.65  | 0.29       |
| - | 5   | -16 | -2    | 1.73 0.27  |
| 5 | -16 | 2   | 1.46  | 0.30       |
| 5 | -16 | 3   | 1.25  | 0.32       |
| - | 5   | -16 | -3    | 0.91 0.25  |
| - | 5   | -16 | -4    | 0.54 0.25  |
| 5 | -16 | 4   | 0.40  | 0.32       |
| 5 | -16 | 5   | 0.99  | 0.36       |
| - | 5   | -16 | -5    | 1.20 0.30  |
| - | 5   | -16 | -6    | 0.22 0.28  |
| 5 | -16 | 6   | 0.58  | 0.40       |
| - | 5   | -16 | -7    | 0.27 0.32  |
| 5 | -16 | 7   | 0.70  | 0.41       |
| - | 5   | -16 | -8    | -0.04 0.34 |
| 5 | -16 | 8   | 0.76  | 0.44       |
| 5 | -17 | -10 | 0.58  | 0.32       |
| 5 | -17 | -10 | 0.90  | 0.35       |
| 5 | 17  | -9  | 0.51  | 0.43       |
| 5 | -17 | -9  | 0.32  | 0.34       |
| 5 | 17  | -8  | 0.91  | 0.41       |
| 5 | -17 | -8  | 0.78  | 0.32       |
| 5 | 17  | -7  | 0.61  | 0.38       |
| 5 | -17 | -7  | 0.35  | 0.31       |
| 5 | 17  | -6  | 0.60  | 0.36       |
| 5 | -17 | -6  | 0.81  | 0.30       |
| 5 | 17  | -5  | 0.55  | 0.33       |
| 5 | -17 | -5  | 0.92  | 0.29       |
| 5 | 17  | -4  | 0.86  | 0.32       |
| 5 | -17 | -4  | 1.19  | 0.29       |
| 5 | 17  | -3  | 0.40  | 0.30       |
| - | 5   | -17 | 3     | 0.37 0.22  |
| 5 | -17 | -3  | 0.68  | 0.28       |
| 5 | 17  | -2  | 0.04  | 0.30       |
| 5 | -17 | -2  | 0.03  | 0.25       |
| - | 5   | -17 | 2     | -0.04 0.22 |
| 5 | 17  | -1  | 1.32  | 0.29       |
| 5 | -17 | -1  | 1.30  | 0.29       |
| - | 5   | -17 | 1     | 1.19 0.25  |
| - | 5   | -17 | 0     | 0.08 0.24  |

|   |     |     |       |      |
|---|-----|-----|-------|------|
| 5 | -17 | 0   | -0.12 | 0.25 |
| - | 5   | -17 | -1    | 0.60 |
| 5 | -17 | 1   | 0.32  | 0.26 |
| 5 | -17 | 2   | 1.90  | 0.33 |
| - | 5   | -17 | -2    | 1.81 |
| - | 5   | -17 | -3    | 0.32 |
| - | 5   | -17 | -4    | 0.83 |
| 5 | -17 | 4   | 0.95  | 0.34 |
| 5 | -17 | 5   | 5.07  | 0.53 |
| - | 5   | -17 | -5    | 4.64 |
| 5 | -17 | 6   | 1.48  | 0.40 |
| - | 5   | -17 | -6    | 1.38 |
| - | 5   | -17 | -7    | 0.14 |
| 5 | -17 | 7   | 0.43  | 0.45 |
| 5 | 18  | -9  | 1.11  | 0.45 |
| 5 | -18 | -9  | 0.75  | 0.32 |
| 5 | -18 | -9  | 1.41  | 0.36 |
| 5 | 18  | -8  | 0.52  | 0.42 |
| 5 | -18 | -8  | 0.44  | 0.34 |
| 5 | 18  | -7  | 0.68  | 0.40 |
| 5 | -18 | -7  | 0.78  | 0.33 |
| 5 | 18  | -6  | 0.61  | 0.37 |
| 5 | -18 | -6  | 0.83  | 0.31 |
| 5 | 18  | -5  | 0.17  | 0.34 |
| 5 | -18 | -5  | 0.46  | 0.30 |
| 5 | 18  | -4  | 0.86  | 0.34 |
| 5 | -18 | -4  | 1.16  | 0.30 |
| 5 | 18  | -3  | 0.78  | 0.32 |
| 5 | -18 | -3  | 0.95  | 0.30 |
| 5 | 18  | -2  | -0.06 | 0.30 |
| - | 5   | -18 | 2     | 0.23 |
| 5 | -18 | -2  | 0.32  | 0.29 |
| - | 5   | -18 | 1     | 2.49 |
| 5 | -18 | -1  | 2.57  | 0.33 |
| 5 | -18 | 0   | -0.15 | 0.29 |
| - | 5   | -18 | 0     | 0.08 |
| 5 | -18 | 1   | 0.58  | 0.31 |
| - | 5   | -18 | -1    | 0.29 |
| - | 5   | -18 | -2    | 2.16 |
| 5 | -18 | 2   | 2.15  | 0.34 |
| 5 | -18 | 3   | -0.25 | 0.33 |
| - | 5   | -18 | -3    | 0.18 |
| - | 5   | -18 | -4    | 1.83 |
| - | 5   | -18 | -5    | 0.67 |
| 5 | -18 | 5   | 1.07  | 0.38 |
| - | 5   | -18 | -6    | 0.12 |
| 5 | -18 | 6   | 0.53  | 0.44 |
| 5 | -18 | 7   | 0.64  | 0.47 |
| 5 | 19  | -8  | 0.48  | 0.43 |
| 5 | -19 | -8  | 0.63  | 0.35 |
| 5 | 19  | -7  | 0.54  | 0.41 |
| 5 | -19 | -7  | 0.32  | 0.33 |
| 5 | 19  | -6  | 0.43  | 0.39 |
| 5 | -19 | -6  | 0.59  | 0.33 |

|   |     |     |       |      |      |
|---|-----|-----|-------|------|------|
| 5 | 19  | -5  | 1.23  | 0.38 |      |
| 5 | -19 | -5  | 1.56  | 0.32 |      |
| 5 | 19  | -4  | 0.39  | 0.34 |      |
| 5 | -19 | -4  | 0.39  | 0.31 |      |
| 5 | 19  | -3  | -0.15 | 0.32 |      |
| 5 | -19 | -3  | 0.53  | 0.31 |      |
| 5 | -19 | -2  | 0.02  | 0.28 |      |
| - | 5   | -19 | 2     | 0.45 | 0.28 |
| 5 | -19 | -1  | 1.89  | 0.33 |      |
| - | 5   | -19 | 1     | 2.06 | 0.30 |
| - | 5   | -19 | 0     | 0.15 | 0.28 |
| 5 | -19 | 0   | -0.29 | 0.31 |      |
| - | 5   | -19 | -1    | 1.70 | 0.31 |
| 5 | -19 | 1   | 1.62  | 0.34 |      |
| - | 5   | -19 | -2    | 0.12 | 0.30 |
| 5 | -19 | 2   | -0.01 | 0.30 |      |
| 5 | -19 | 3   | 3.03  | 0.39 |      |
| - | 5   | -19 | -3    | 3.33 | 0.36 |
| 5 | -19 | 4   | 0.28  | 0.37 |      |
| - | 5   | -19 | -4    | 0.32 | 0.29 |
| - | 5   | -19 | -5    | 1.29 | 0.35 |
| 5 | 20  | -7  | 0.55  | 0.43 |      |
| 5 | -20 | -7  | 1.11  | 0.36 |      |
| 5 | 20  | -6  | 0.35  | 0.40 |      |
| 5 | -20 | -6  | 0.35  | 0.34 |      |
| 5 | 20  | -5  | 0.63  | 0.38 |      |
| 5 | -20 | -5  | 0.73  | 0.33 |      |
| 5 | -20 | -4  | 1.52  | 0.34 |      |
| 5 | -20 | -3  | 1.48  | 0.33 |      |
| - | 5   | -20 | 2     | 0.42 | 0.30 |
| 5 | -20 | -2  | 0.40  | 0.32 |      |
| 5 | -20 | -1  | 0.69  | 0.33 |      |
| - | 5   | -20 | 1     | 0.82 | 0.30 |
| - | 5   | -20 | 0     | 0.78 | 0.30 |
| 5 | -20 | 0   | 0.30  | 0.33 |      |
| 5 | -20 | 1   | 0.11  | 0.34 |      |
| - | 5   | -20 | -1    | 0.13 | 0.31 |
| - | 5   | -20 | -2    | 0.12 | 0.31 |
| 5 | -20 | 2   | 0.00  | 0.35 |      |
| - | 5   | -20 | -3    | 0.79 | 0.33 |
| 5 | -20 | 3   | 0.52  | 0.36 |      |
| - | 5   | -20 | -4    | 0.07 | 0.34 |
| 5 | -20 | 4   | 0.07  | 0.39 |      |
| 5 | 21  | -6  | 0.38  | 0.42 |      |
| 5 | -21 | -6  | 0.60  | 0.36 |      |
| 5 | -21 | -5  | 1.05  | 0.35 |      |
| 5 | -21 | -4  | 1.07  | 0.36 |      |
| 5 | -21 | -3  | 0.76  | 0.34 |      |
| 5 | -21 | -2  | 0.47  | 0.34 |      |
| 5 | -21 | -1  | 1.69  | 0.36 |      |
| - | 5   | -21 | 1     | 1.13 | 0.33 |
| - | 5   | -21 | 0     | 0.30 | 0.32 |
| 5 | -21 | 0   | 0.19  | 0.32 |      |
| - | 5   | -21 | -1    | 0.38 | 0.33 |

|   |     |     |        |        |      |
|---|-----|-----|--------|--------|------|
| 5 | -21 | 1   | 0.37   | 0.35   |      |
| 5 | -21 | 2   | 1.04   | 0.38   |      |
| - | 5   | -21 | -2     | 1.15   | 0.35 |
| 5 | -21 | 3   | 0.02   | 0.38   |      |
| 5 | -22 | -4  | 1.15   | 0.36   |      |
| 5 | -22 | -3  | 0.48   | 0.35   |      |
| 5 | -22 | -2  | -0.14  | 0.35   |      |
| - | 5   | -22 | 1      | 0.23   | 0.35 |
| 5 | -22 | -1  | 0.78   | 0.36   |      |
| - | 5   | -22 | 0      | 0.29   | 0.34 |
| 5 | -22 | 0   | 0.07   | 0.36   |      |
| 5 | -22 | 1   | 0.88   | 0.37   |      |
| 6 | 0   | -15 | -0.76  | 0.35   |      |
| 6 | 0   | -14 | 3.11   | 0.38   |      |
| 6 | 0   | -13 | -0.58  | 0.31   |      |
| 6 | 0   | -12 | 24.94  | 1.00   |      |
| 6 | 0   | -11 | 0.11   | 0.22   |      |
| 6 | 0   | -11 | -0.47  | 0.26   |      |
| 6 | 0   | -10 | 11.56  | 0.57   |      |
| 6 | 0   | -10 | 12.29  | 0.62   |      |
| 6 | 0   | -9  | -0.19  | 0.19   |      |
| 6 | 0   | -9  | -0.16  | 0.18   |      |
| 6 | 0   | -8  | 13.36  | 0.64   |      |
| 6 | 0   | -8  | 13.35  | 0.57   |      |
| 6 | 0   | -7  | -0.35  | 0.17   |      |
| 6 | 0   | -7  | -0.03  | 0.15   |      |
| - | 6   | 0   | 7      | -0.15  | 0.10 |
| 6 | 0   | -6  | 4.16   | 0.29   |      |
| 6 | 0   | -6  | 4.77   | 0.32   |      |
| - | 6   | 0   | 6      | 4.73   | 0.23 |
| 6 | 0   | -5  | -0.21  | 0.11   |      |
| 6 | 0   | -5  | 0.07   | 0.14   |      |
| - | 6   | 0   | 5      | 0.02   | 0.09 |
| 6 | 0   | -4  | 123.24 | 5.25   |      |
| 6 | 0   | -4  | 123.91 | 4.27   |      |
| - | 6   | 0   | 4      | 129.78 | 4.47 |
| 6 | 0   | -3  | -0.07  | 0.10   |      |
| 6 | 0   | -3  | 0.70   | 0.13   |      |
| 6 | 0   | -2  | 21.46  | 0.95   |      |
| - | 6   | 0   | 2      | 21.45  | 0.80 |
| - | 6   | 0   | 1      | -0.15  | 0.10 |
| 6 | 0   | -1  | -0.11  | 0.07   |      |
| 6 | 0   | -1  | -0.02  | 0.16   |      |
| 6 | 0   | 0   | 95.83  | 4.02   |      |
| - | 6   | 0   | 0      | 95.40  | 3.42 |
| 6 | 0   | 1   | -0.15  | 0.13   |      |
| - | 6   | 0   | -1     | -0.12  | 0.12 |
| - | 6   | 0   | -2     | 31.63  | 1.04 |
| 6 | 0   | 2   | 23.98  | 1.22   |      |
| - | 6   | 0   | -3     | -0.17  | 0.14 |
| 6 | 0   | 3   | -0.44  | 0.20   |      |
| - | 6   | 0   | -3     | -0.08  | 0.10 |
| - | 6   | 0   | -4     | 9.89   | 0.46 |
| 6 | 0   | 4   | 9.28   | 0.53   |      |

|   |   |    |     |       |      |
|---|---|----|-----|-------|------|
| - | 6 | 0  | -4  | 9.34  | 0.38 |
| - | 6 | 0  | -5  | -0.18 | 0.18 |
|   | 6 | 0  | 5   | 0.20  | 0.24 |
| - | 6 | 0  | -5  | -0.16 | 0.14 |
| - | 6 | 0  | -6  | 0.63  | 0.17 |
|   | 6 | 0  | 6   | 0.74  | 0.24 |
| - | 6 | 0  | -6  | 0.41  | 0.20 |
| - | 6 | 0  | -7  | 0.02  | 0.18 |
| - | 6 | 0  | -7  | -0.11 | 0.21 |
|   | 6 | 0  | 7   | 0.33  | 0.29 |
| - | 6 | 0  | -8  | 2.86  | 0.31 |
| - | 6 | 0  | -8  | 2.92  | 0.29 |
|   | 6 | 0  | 8   | 3.17  | 0.40 |
|   | 6 | 0  | 9   | 0.16  | 0.33 |
| - | 6 | 0  | -9  | -0.13 | 0.22 |
|   | 6 | 0  | 10  | 4.58  | 0.54 |
| - | 6 | 0  | -10 | 4.84  | 0.41 |
| - | 6 | 0  | -11 | -0.44 | 0.27 |
|   | 6 | 0  | 11  | 0.12  | 0.38 |
| - | 6 | 0  | -12 | 1.09  | 0.34 |
|   | 6 | 0  | 12  | 1.82  | 0.44 |
|   | 6 | 1  | -15 | 1.39  | 0.41 |
|   | 6 | -1 | -15 | 1.39  | 0.37 |
|   | 6 | 1  | -14 | -0.47 | 0.34 |
|   | 6 | -1 | -14 | -0.66 | 0.35 |
|   | 6 | 1  | -13 | -0.39 | 0.31 |
|   | 6 | -1 | -13 | -0.43 | 0.29 |
|   | 6 | 1  | -12 | 0.49  | 0.26 |
|   | 6 | 1  | -12 | 0.05  | 0.29 |
|   | 6 | -1 | -12 | -0.27 | 0.28 |
|   | 6 | 1  | -11 | 17.59 | 0.84 |
|   | 6 | 1  | -11 | 17.67 | 0.75 |
|   | 6 | -1 | -11 | 17.84 | 0.74 |
|   | 6 | 1  | -10 | -0.15 | 0.20 |
|   | 6 | 1  | -10 | -0.09 | 0.21 |
|   | 6 | -1 | -10 | -0.11 | 0.18 |
|   | 6 | -1 | -10 | -0.50 | 0.24 |
|   | 6 | 1  | -9  | 13.39 | 0.65 |
|   | 6 | 1  | -9  | 13.28 | 0.56 |
|   | 6 | -1 | -9  | 12.92 | 0.64 |
|   | 6 | -1 | -9  | 13.19 | 0.59 |
|   | 6 | 1  | -8  | 3.70  | 0.32 |
|   | 6 | 1  | -8  | 3.85  | 0.32 |
|   | 6 | -1 | -8  | 3.47  | 0.34 |
|   | 6 | -1 | -8  | 4.07  | 0.32 |
|   | 6 | 1  | -7  | 24.62 | 0.93 |
| - | 6 | 1  | 7   | 26.01 | 0.93 |
|   | 6 | 1  | -7  | 25.07 | 1.11 |
|   | 6 | -1 | -7  | 25.25 | 0.94 |
|   | 6 | -1 | -7  | 24.88 | 1.11 |
| - | 6 | -1 | 7   | 26.18 | 0.92 |
|   | 6 | 1  | -6  | 0.08  | 0.15 |
|   | 6 | 1  | -6  | 0.02  | 0.14 |
| - | 6 | 1  | 6   | 0.15  | 0.10 |

|   |   |    |    |        |      |
|---|---|----|----|--------|------|
| - | 6 | -1 | 6  | 0.12   | 0.08 |
|   | 6 | -1 | -6 | 0.02   | 0.15 |
|   | 6 | -1 | -6 | 0.16   | 0.14 |
|   | 6 | 1  | -5 | 43.69  | 1.87 |
| - | 6 | 1  | 5  | 44.21  | 1.58 |
|   | 6 | 1  | -5 | 42.01  | 1.52 |
|   | 6 | -1 | -5 | 43.46  | 1.86 |
| - | 6 | -1 | 5  | 44.43  | 1.58 |
|   | 6 | -1 | -5 | 46.17  | 1.54 |
| - | 6 | 1  | 4  | 0.30   | 0.10 |
|   | 6 | 1  | -4 | 0.36   | 0.14 |
|   | 6 | 1  | -4 | 0.13   | 0.11 |
| - | 6 | -1 | 4  | 0.36   | 0.09 |
|   | 6 | -1 | -4 | 0.22   | 0.13 |
|   | 6 | -1 | -4 | 0.54   | 0.14 |
|   | 6 | 1  | -3 | 89.63  | 3.79 |
| - | 6 | 1  | 3  | 91.03  | 3.23 |
|   | 6 | -1 | -3 | 91.62  | 3.09 |
| - | 6 | -1 | 3  | 89.10  | 3.23 |
|   | 6 | -1 | -3 | 90.92  | 3.79 |
| - | 6 | 1  | 2  | 31.99  | 1.15 |
|   | 6 | 1  | -2 | 32.55  | 1.35 |
|   | 6 | 1  | -2 | 32.23  | 1.09 |
|   | 6 | -1 | -2 | 30.93  | 1.35 |
| - | 6 | -1 | 2  | 31.27  | 1.14 |
|   | 6 | -1 | -2 | 28.75  | 1.09 |
|   | 6 | 1  | -1 | 138.44 | 4.58 |
| - | 6 | 1  | 1  | 135.44 | 4.80 |
|   | 6 | 1  | -1 | 132.18 | 5.64 |
| - | 6 | -1 | 1  | 133.19 | 4.80 |
|   | 6 | -1 | -1 | 134.31 | 5.65 |
|   | 6 | 1  | 0  | 32.98  | 1.67 |
| - | 6 | -1 | 0  | 42.13  | 1.43 |
|   | 6 | -1 | 0  | 42.33  | 1.68 |
| - | 6 | 1  | -1 | 1.75   | 0.16 |
|   | 6 | 1  | 1  | 1.20   | 0.16 |
|   | 6 | -1 | 1  | 1.59   | 0.21 |
|   | 6 | 1  | 2  | 2.10   | 0.23 |
| - | 6 | 1  | -2 | 2.42   | 0.22 |
| - | 6 | -1 | -2 | 2.11   | 0.16 |
| - | 6 | -1 | -2 | 2.27   | 0.21 |
|   | 6 | -1 | 2  | 1.46   | 0.19 |
|   | 6 | 1  | 3  | 43.42  | 1.94 |
| - | 6 | 1  | -3 | 44.62  | 1.56 |
| - | 6 | 1  | -3 | 47.81  | 1.66 |
| - | 6 | -1 | -3 | 45.52  | 1.65 |
| - | 6 | -1 | -3 | 44.52  | 1.55 |
|   | 6 | 1  | 4  | -0.30  | 0.22 |
| - | 6 | 1  | -4 | -0.10  | 0.12 |
| - | 6 | 1  | -4 | -0.14  | 0.17 |
| - | 6 | -1 | -4 | -0.10  | 0.17 |
|   | 6 | -1 | 4  | -0.14  | 0.21 |
| - | 6 | -1 | -4 | -0.12  | 0.11 |
| - | 6 | 1  | -5 | 30.94  | 1.14 |

|   |    |     |       |       |      |
|---|----|-----|-------|-------|------|
| 6 | 1  | 5   | 30.66 | 1.42  |      |
| - | 6  | 1   | -5    | 34.32 | 1.23 |
| 6 | -1 | 5   | 32.57 | 1.43  |      |
| - | 6  | -1  | -5    | 33.73 | 1.23 |
| - | 6  | -1  | -5    | 32.16 | 1.14 |
| 6 | 1  | 6   | 12.18 | 0.63  |      |
| - | 6  | 1   | -6    | 11.68 | 0.50 |
| - | 6  | 1   | -6    | 12.45 | 0.57 |
| 6 | -1 | 6   | 12.24 | 0.66  |      |
| - | 6  | -1  | -6    | 11.71 | 0.57 |
| - | 6  | -1  | -6    | 12.10 | 0.50 |
| - | 6  | 1   | -7    | 24.45 | 0.94 |
| 6 | 1  | 7   | 22.31 | 1.08  |      |
| - | 6  | 1   | -7    | 22.36 | 0.86 |
| - | 6  | -1  | -7    | 22.53 | 0.85 |
| 6 | -1 | 7   | 22.60 | 1.08  |      |
| - | 6  | -1  | -7    | 23.78 | 0.93 |
| - | 6  | 1   | -8    | 0.57  | 0.25 |
| 6 | 1  | 8   | 0.52  | 0.31  |      |
| - | 6  | 1   | -8    | 0.45  | 0.21 |
| - | 6  | -1  | -8    | 0.10  | 0.21 |
| 6 | -1 | 8   | 0.49  | 0.31  |      |
| - | 6  | -1  | -8    | 0.65  | 0.24 |
| 6 | 1  | 9   | 2.81  | 0.37  |      |
| - | 6  | 1   | -9    | 2.29  | 0.27 |
| 6 | -1 | 9   | 2.50  | 0.37  |      |
| - | 6  | -1  | -9    | 2.56  | 0.30 |
| - | 6  | -1  | -9    | 2.23  | 0.26 |
| 6 | 1  | 10  | 1.12  | 0.37  |      |
| - | 6  | 1   | -10   | 1.20  | 0.27 |
| - | 6  | -1  | -10   | 0.81  | 0.26 |
| 6 | -1 | 10  | 1.07  | 0.36  |      |
| 6 | 1  | 11  | 2.63  | 0.43  |      |
| - | 6  | 1   | -11   | 1.78  | 0.31 |
| 6 | -1 | 11  | 1.97  | 0.41  |      |
| - | 6  | -1  | -11   | 1.36  | 0.30 |
| 6 | 1  | 12  | 2.34  | 0.46  |      |
| - | 6  | 1   | -12   | 0.85  | 0.33 |
| 6 | -1 | 12  | 1.72  | 0.44  |      |
| 6 | 2  | -15 | -0.48 | 0.39  |      |
| 6 | -2 | -15 | -0.31 | 0.35  |      |
| 6 | 2  | -14 | 1.94  | 0.38  |      |
| 6 | -2 | -14 | 1.75  | 0.38  |      |
| 6 | 2  | -13 | 0.64  | 0.32  |      |
| 6 | -2 | -13 | 0.35  | 0.32  |      |
| 6 | 2  | -12 | 2.77  | 0.33  |      |
| 6 | 2  | -12 | 3.09  | 0.43  |      |
| 6 | -2 | -12 | 2.71  | 0.34  |      |
| 6 | 2  | -11 | -0.03 | 0.24  |      |
| 6 | 2  | -11 | 0.04  | 0.26  |      |
| 6 | -2 | -11 | -0.67 | 0.24  |      |
| 6 | 2  | -10 | 5.30  | 0.41  |      |
| 6 | 2  | -10 | 5.46  | 0.39  |      |
| 6 | -2 | -10 | 5.06  | 0.38  |      |

|   |    |    |       |       |      |
|---|----|----|-------|-------|------|
| 6 | 2  | -9 | -0.12 | 0.20  |      |
| 6 | 2  | -9 | 0.11  | 0.20  |      |
| 6 | -2 | -9 | -0.38 | 0.23  |      |
| 6 | -2 | -9 | -0.08 | 0.16  |      |
| 6 | 2  | -8 | 73.05 | 3.15  |      |
| 6 | 2  | -8 | 73.78 | 2.57  |      |
| 6 | -2 | -8 | 78.79 | 2.59  |      |
| 6 | -2 | -8 | 72.65 | 3.13  |      |
| 6 | 2  | -7 | 16.57 | 0.77  |      |
| 6 | 2  | -7 | 16.02 | 0.64  |      |
| - | 6  | 2  | 7     | 16.78 | 0.63 |
| 6 | -2 | -7 | 16.28 | 0.74  |      |
| 6 | -2 | -7 | 16.64 | 0.64  |      |
| 6 | 2  | -6 | 0.18  | 0.16  |      |
| 6 | 2  | -6 | 0.20  | 0.13  |      |
| - | 6  | 2  | 6     | 0.13  | 0.10 |
| 6 | -2 | -6 | 0.04  | 0.13  |      |
| - | 6  | -2 | 6     | 0.14  | 0.08 |
| 6 | -2 | -6 | -0.02 | 0.15  |      |
| 6 | 2  | -5 | 0.40  | 0.12  |      |
| 6 | 2  | -5 | 0.50  | 0.14  |      |
| - | 6  | 2  | 5     | 0.39  | 0.10 |
| 6 | -2 | -5 | 0.18  | 0.13  |      |
| 6 | -2 | -5 | 0.39  | 0.13  |      |
| - | 6  | -2 | 5     | 0.40  | 0.09 |
| - | 6  | 2  | 4     | 2.54  | 0.19 |
| 6 | 2  | -4 | 2.35  | 0.22  |      |
| 6 | 2  | -4 | 2.77  | 0.19  |      |
| - | 6  | -2 | 4     | 2.58  | 0.18 |
| 6 | -2 | -4 | 2.26  | 0.18  |      |
| 6 | -2 | -4 | 2.36  | 0.21  |      |
| - | 6  | 2  | 3     | 54.17 | 1.89 |
| 6 | 2  | -3 | 52.68 | 2.22  |      |
| - | 6  | -2 | 3     | 50.12 | 1.88 |
| 6 | -2 | -3 | 50.89 | 2.21  |      |
| 6 | -2 | -3 | 53.75 | 1.81  |      |
| 6 | 2  | -2 | 39.01 | 1.38  |      |
| - | 6  | 2  | 2     | 41.09 | 1.46 |
| 6 | 2  | -2 | 42.28 | 1.72  |      |
| - | 6  | -2 | 2     | 39.88 | 1.45 |
| 6 | -2 | -2 | 38.52 | 1.71  |      |
| 6 | -2 | -2 | 39.88 | 1.39  |      |
| 6 | 2  | -1 | 47.41 | 2.20  |      |
| - | 6  | 2  | 1     | 52.98 | 1.87 |
| 6 | 2  | -1 | 53.29 | 1.77  |      |
| 6 | -2 | -1 | 52.47 | 2.19  |      |
| 6 | -2 | -1 | 51.42 | 1.78  |      |
| - | 6  | -2 | 1     | 52.92 | 1.87 |
| 6 | 2  | 0  | 69.37 | 2.30  |      |
| 6 | -2 | 0  | 65.55 | 2.31  |      |
| 6 | -2 | 0  | 67.77 | 2.86  |      |
| - | 6  | -2 | 0     | 67.80 | 2.43 |
| 6 | 2  | 1  | 2.69  | 0.31  |      |
| - | 6  | 2  | -1    | 2.57  | 0.22 |

|   |    |    |       |       |      |
|---|----|----|-------|-------|------|
| 6 | -2 | 1  | 2.47  | 0.25  |      |
| 6 | 2  | 2  | 7.89  | 0.46  |      |
| - | 6  | 2  | -2    | 8.32  | 0.40 |
| - | 6  | -2 | -2    | 8.15  | 0.37 |
| 6 | -2 | 2  | 8.32  | 0.46  |      |
| - | 6  | -2 | -2    | 7.85  | 0.31 |
| 6 | 2  | 3  | 2.71  | 0.35  |      |
| - | 6  | 2  | -3    | 3.25  | 0.22 |
| - | 6  | 2  | -3    | 2.89  | 0.29 |
| - | 6  | -2 | -3    | 3.06  | 0.28 |
| - | 6  | -2 | -3    | 3.44  | 0.20 |
| 6 | 2  | 4  | 1.98  | 0.24  |      |
| - | 6  | 2  | -4    | 1.94  | 0.21 |
| - | 6  | 2  | -4    | 1.82  | 0.19 |
| - | 6  | -2 | -4    | 1.79  | 0.20 |
| - | 6  | -2 | -4    | 1.93  | 0.19 |
| - | 6  | 2  | -5    | 1.82  | 0.22 |
| 6 | 2  | 5  | 1.71  | 0.27  |      |
| - | 6  | 2  | -5    | 1.73  | 0.17 |
| 6 | -2 | 5  | 2.12  | 0.27  |      |
| - | 6  | -2 | -5    | 1.81  | 0.16 |
| - | 6  | -2 | -5    | 1.77  | 0.20 |
| - | 6  | 2  | -6    | 14.79 | 0.64 |
| 6 | 2  | 6  | 14.14 | 0.74  |      |
| - | 6  | 2  | -6    | 14.04 | 0.57 |
| 6 | -2 | 6  | 14.46 | 0.74  |      |
| - | 6  | -2 | -6    | 13.94 | 0.63 |
| - | 6  | -2 | -6    | 14.06 | 0.56 |
| 6 | 2  | 7  | 3.00  | 0.42  |      |
| - | 6  | 2  | -7    | 2.64  | 0.30 |
| - | 6  | 2  | -7    | 2.99  | 0.29 |
| - | 6  | -2 | -7    | 3.00  | 0.30 |
| 6 | -2 | 7  | 2.82  | 0.34  |      |
| - | 6  | -2 | -7    | 3.06  | 0.37 |
| - | 6  | 2  | -8    | 1.33  | 0.23 |
| 6 | 2  | 8  | 1.35  | 0.32  |      |
| - | 6  | 2  | -8    | 1.33  | 0.27 |
| - | 6  | -2 | -8    | 1.63  | 0.22 |
| - | 6  | -2 | -8    | 1.73  | 0.26 |
| 6 | -2 | 8  | 1.20  | 0.33  |      |
| - | 6  | 2  | -9    | 0.23  | 0.24 |
| 6 | 2  | 9  | 0.44  | 0.35  |      |
| 6 | -2 | 9  | 0.32  | 0.34  |      |
| - | 6  | -2 | -9    | 0.27  | 0.22 |
| - | 6  | -2 | -9    | 0.19  | 0.27 |
| 6 | 2  | 10 | 2.87  | 0.40  |      |
| - | 6  | 2  | -10   | 2.37  | 0.30 |
| - | 6  | -2 | -10   | 2.11  | 0.29 |
| 6 | -2 | 10 | 2.29  | 0.36  |      |
| - | 6  | 2  | -11   | 3.06  | 0.34 |
| 6 | 2  | 11 | 4.38  | 0.61  |      |
| 6 | -2 | 11 | 2.97  | 0.44  |      |
| - | 6  | 2  | -12   | 0.48  | 0.33 |
| 6 | -2 | 12 | 0.46  | 0.42  |      |

|   |    |     |        |        |      |
|---|----|-----|--------|--------|------|
| 6 | 3  | -15 | 1.52   | 0.42   |      |
| 6 | 3  | -14 | -0.51  | 0.35   |      |
| 6 | -3 | -14 | -0.49  | 0.35   |      |
| 6 | 3  | -13 | 0.40   | 0.32   |      |
| 6 | -3 | -13 | 0.07   | 0.33   |      |
| 6 | 3  | -12 | 8.18   | 0.49   |      |
| 6 | 3  | -12 | 8.40   | 0.58   |      |
| 6 | -3 | -12 | 8.52   | 0.50   |      |
| 6 | 3  | -11 | 4.15   | 0.42   |      |
| 6 | 3  | -11 | 4.37   | 0.37   |      |
| 6 | -3 | -11 | 3.82   | 0.38   |      |
| 6 | 3  | -10 | 0.72   | 0.23   |      |
| 6 | 3  | -10 | 0.61   | 0.24   |      |
| 6 | -3 | -10 | 0.41   | 0.25   |      |
| 6 | 3  | -9  | 2.74   | 0.35   |      |
| 6 | 3  | -9  | 3.24   | 0.32   |      |
| 6 | -3 | -9  | 2.42   | 0.28   |      |
| 6 | 3  | -8  | 2.77   | 0.32   |      |
| 6 | 3  | -8  | 2.94   | 0.29   |      |
| 6 | -3 | -8  | 2.26   | 0.25   |      |
| 6 | -3 | -8  | 2.35   | 0.25   |      |
| - | 6  | 3   | 7      | 12.88  | 0.51 |
| 6 | 3  | -7  | 12.42  | 0.62   |      |
| 6 | 3  | -7  | 12.71  | 0.52   |      |
| 6 | -3 | -7  | 13.72  | 0.56   |      |
| 6 | -3 | -7  | 12.35  | 0.59   |      |
| - | 6  | 3   | 6      | 25.70  | 0.94 |
| 6 | 3  | -6  | 26.05  | 1.12   |      |
| 6 | 3  | -6  | 24.59  | 0.90   |      |
| 6 | -3 | -6  | 24.53  | 1.09   |      |
| 6 | -3 | -6  | 26.10  | 0.92   |      |
| - | 6  | -3  | 6      | 24.93  | 0.92 |
| - | 6  | 3   | 5      | 0.33   | 0.11 |
| 6 | 3  | -5  | 0.65   | 0.11   |      |
| 6 | 3  | -5  | 0.33   | 0.17   |      |
| 6 | -3 | -5  | 0.25   | 0.15   |      |
| 6 | -3 | -5  | 0.41   | 0.12   |      |
| - | 6  | -3  | 5      | 0.35   | 0.09 |
| 6 | 3  | -4  | 8.97   | 0.46   |      |
| - | 6  | 3   | 4      | 8.64   | 0.36 |
| - | 6  | -3  | 4      | 8.28   | 0.35 |
| 6 | -3 | -4  | 8.56   | 0.42   |      |
| 6 | -3 | -4  | 8.61   | 0.39   |      |
| 6 | 3  | -3  | 102.93 | 3.50   |      |
| - | 6  | 3   | 3      | 106.38 | 3.68 |
| 6 | 3  | -3  | 104.50 | 4.32   |      |
| 6 | -3 | -3  | 103.78 | 3.51   |      |
| - | 6  | -3  | 3      | 99.11  | 3.67 |
| 6 | -3 | -3  | 101.40 | 4.31   |      |
| - | 6  | 3   | 2      | 0.49   | 0.12 |
| 6 | 3  | -2  | 0.54   | 0.15   |      |
| 6 | 3  | -2  | 0.55   | 0.08   |      |
| - | 6  | -3  | 2      | 0.26   | 0.11 |
| 6 | -3 | -2  | 0.28   | 0.10   |      |

|   |    |    |        |        |      |
|---|----|----|--------|--------|------|
| 6 | -3 | -2 | 0.30   | 0.14   |      |
| 6 | 3  | -1 | 104.23 | 3.67   |      |
| - | 6  | 3  | 1      | 111.66 | 3.87 |
| 6 | -3 | -1 | 110.05 | 3.69   |      |
| 6 | -3 | -1 | 108.08 | 4.53   |      |
| - | 6  | -3 | 1      | 107.61 | 3.86 |
| 6 | 3  | 0  | 6.05   | 0.26   |      |
| 6 | 3  | 0  | 5.97   | 0.41   |      |
| 6 | -3 | 0  | 6.57   | 0.39   |      |
| 6 | -3 | 0  | 7.46   | 0.30   |      |
| - | 6  | -3 | 0      | 6.60   | 0.32 |
| 6 | 3  | 1  | 9.96   | 0.50   |      |
| - | 6  | 3  | -1     | 10.12  | 0.42 |
| 6 | -3 | 1  | 10.01  | 0.48   |      |
| - | 6  | -3 | -1     | 8.15   | 0.41 |
| 6 | 3  | 2  | 20.93  | 0.94   |      |
| - | 6  | 3  | -2     | 20.81  | 0.80 |
| - | 6  | -3 | -2     | 19.78  | 0.79 |
| - | 6  | -3 | -2     | 20.52  | 0.72 |
| 6 | -3 | 2  | 21.58  | 0.93   |      |
| 6 | 3  | 3  | 35.66  | 1.59   |      |
| - | 6  | 3  | -3     | 36.56  | 1.28 |
| - | 6  | 3  | -3     | 37.64  | 1.37 |
| - | 6  | -3 | -3     | 36.10  | 1.26 |
| - | 6  | -3 | -3     | 37.54  | 1.36 |
| 6 | 3  | 4  | 23.36  | 1.05   |      |
| - | 6  | 3  | -4     | 23.61  | 0.90 |
| - | 6  | 3  | -4     | 22.14  | 0.83 |
| - | 6  | -3 | -4     | 22.95  | 0.89 |
| - | 6  | -3 | -4     | 22.32  | 0.81 |
| - | 6  | 3  | -5     | 0.91   | 0.17 |
| 6 | 3  | 5  | 0.94   | 0.25   |      |
| - | 6  | 3  | -5     | 0.89   | 0.21 |
| 6 | -3 | 5  | 1.02   | 0.26   |      |
| - | 6  | -3 | -5     | 0.96   | 0.18 |
| - | 6  | -3 | -5     | 1.04   | 0.14 |
| - | 6  | 3  | -6     | 1.14   | 0.23 |
| 6 | 3  | 6  | 1.52   | 0.28   |      |
| - | 6  | 3  | -6     | 1.55   | 0.20 |
| 6 | -3 | 6  | 1.42   | 0.27   |      |
| - | 6  | -3 | -6     | 1.30   | 0.17 |
| - | 6  | -3 | -6     | 1.43   | 0.22 |
| - | 6  | 3  | -7     | 2.20   | 0.26 |
| 6 | 3  | 7  | 2.21   | 0.31   |      |
| - | 6  | 3  | -7     | 1.82   | 0.23 |
| - | 6  | -3 | -7     | 2.12   | 0.21 |
| - | 6  | -3 | -7     | 2.25   | 0.25 |
| 6 | -3 | 7  | 2.34   | 0.33   |      |
| - | 6  | 3  | -8     | 9.46   | 0.58 |
| 6 | 3  | 8  | 9.63   | 0.62   |      |
| - | 6  | 3  | -8     | 9.33   | 0.48 |
| - | 6  | -3 | -8     | 9.39   | 0.47 |
| 6 | -3 | 8  | 9.26   | 0.62   |      |
| - | 6  | -3 | -8     | 9.80   | 0.54 |

|   |   |    |     |       |      |
|---|---|----|-----|-------|------|
| - | 6 | 3  | -9  | 6.96  | 0.45 |
|   | 6 | 3  | 9   | 7.63  | 0.62 |
| - | 6 | -3 | -9  | 7.16  | 0.52 |
|   | 6 | -3 | 9   | 7.59  | 0.58 |
| - | 6 | 3  | -10 | 0.19  | 0.28 |
|   | 6 | 3  | 10  | 0.68  | 0.36 |
|   | 6 | -3 | 10  | 0.51  | 0.38 |
|   | 6 | 3  | 11  | 4.51  | 0.55 |
| - | 6 | 3  | -11 | 2.52  | 0.34 |
|   | 6 | -3 | 11  | 2.90  | 0.45 |
| - | 6 | 3  | -12 | 0.25  | 0.33 |
|   | 6 | -3 | 12  | 0.39  | 0.42 |
|   | 6 | 4  | -14 | 5.35  | 0.55 |
|   | 6 | -4 | -14 | 4.71  | 0.48 |
|   | 6 | 4  | -13 | 0.89  | 0.33 |
|   | 6 | 4  | -13 | 0.48  | 0.31 |
|   | 6 | -4 | -13 | 0.59  | 0.34 |
|   | 6 | 4  | -12 | 17.81 | 0.79 |
|   | 6 | 4  | -12 | 18.08 | 0.90 |
|   | 6 | -4 | -12 | 18.69 | 0.78 |
|   | 6 | 4  | -11 | 1.83  | 0.28 |
|   | 6 | 4  | -11 | 1.69  | 0.29 |
|   | 6 | -4 | -11 | 1.27  | 0.30 |
|   | 6 | 4  | -10 | 0.03  | 0.22 |
|   | 6 | 4  | -10 | 0.06  | 0.25 |
|   | 6 | -4 | -10 | -0.34 | 0.24 |
|   | 6 | 4  | -9  | 0.64  | 0.20 |
|   | 6 | 4  | -9  | 0.38  | 0.24 |
|   | 6 | -4 | -9  | 0.03  | 0.24 |
|   | 6 | 4  | -8  | 6.05  | 0.43 |
|   | 6 | 4  | -8  | 6.04  | 0.33 |
|   | 6 | -4 | -8  | 6.28  | 0.38 |
|   | 6 | 4  | -7  | 0.80  | 0.21 |
|   | 6 | 4  | -7  | 0.77  | 0.15 |
| - | 6 | 4  | 7   | 0.59  | 0.14 |
|   | 6 | -4 | -7  | 0.51  | 0.20 |
|   | 6 | -4 | -7  | 0.56  | 0.14 |
| - | 6 | 4  | 6   | 2.15  | 0.22 |
|   | 6 | 4  | -6  | 2.42  | 0.30 |
|   | 6 | 4  | -6  | 2.30  | 0.21 |
|   | 6 | -4 | -6  | 2.10  | 0.21 |
|   | 6 | -4 | -6  | 2.00  | 0.20 |
| - | 6 | -4 | 6   | 2.41  | 0.17 |
| - | 6 | 4  | 5   | 0.34  | 0.11 |
|   | 6 | 4  | -5  | 0.31  | 0.17 |
|   | 6 | 4  | -5  | 0.53  | 0.11 |
|   | 6 | -4 | -5  | 0.43  | 0.12 |
|   | 6 | -4 | -5  | 0.48  | 0.17 |
| - | 6 | -4 | 5   | 0.23  | 0.09 |
|   | 6 | 4  | -4  | 11.64 | 0.55 |
| - | 6 | 4  | 4   | 11.45 | 0.46 |
|   | 6 | -4 | -4  | 11.46 | 0.52 |
|   | 6 | -4 | -4  | 11.55 | 0.48 |
| - | 6 | -4 | 4   | 11.24 | 0.45 |

|   |   |    |    |       |      |
|---|---|----|----|-------|------|
| - | 6 | 4  | 3  | 99.02 | 3.51 |
|   | 6 | 4  | -3 | 97.65 | 3.33 |
|   | 6 | 4  | -3 | 99.54 | 4.13 |
|   | 6 | -4 | -3 | 98.87 | 3.36 |
| - | 6 | -4 | 3  | 98.17 | 3.51 |
|   | 6 | -4 | -3 | 96.57 | 4.11 |
| - | 6 | 4  | 2  | 20.80 | 0.76 |
|   | 6 | 4  | -2 | 20.16 | 0.69 |
|   | 6 | -4 | -2 | 19.25 | 0.73 |
|   | 6 | -4 | -2 | 19.76 | 0.88 |
| - | 6 | -4 | 2  | 19.86 | 0.75 |
| - | 6 | 4  | 1  | 0.36  | 0.13 |
|   | 6 | 4  | -1 | 0.40  | 0.18 |
| - | 6 | -4 | 1  | 0.02  | 0.10 |
|   | 6 | -4 | -1 | 0.46  | 0.12 |
|   | 6 | -4 | -1 | 0.48  | 0.16 |
| - | 6 | 4  | 0  | 19.40 | 0.77 |
|   | 6 | 4  | 0  | 21.38 | 0.94 |
|   | 6 | -4 | 0  | 20.47 | 0.91 |
|   | 6 | -4 | 0  | 20.15 | 0.73 |
| - | 6 | -4 | 0  | 20.08 | 0.77 |
| - | 6 | 4  | -1 | 0.91  | 0.15 |
|   | 6 | 4  | 1  | 0.51  | 0.20 |
|   | 6 | -4 | 1  | 0.32  | 0.16 |
| - | 6 | -4 | -1 | 0.67  | 0.13 |
|   | 6 | 4  | 2  | 43.16 | 1.86 |
| - | 6 | 4  | -2 | 43.13 | 1.59 |
|   | 6 | -4 | 2  | 43.30 | 1.85 |
| - | 6 | 4  | -3 | 1.43  | 0.19 |
|   | 6 | 4  | 3  | 1.48  | 0.23 |
| - | 6 | 4  | -3 | 1.60  | 0.16 |
|   | 6 | -4 | 3  | 1.65  | 0.23 |
| - | 6 | -4 | -3 | 1.72  | 0.18 |
| - | 6 | -4 | -3 | 1.74  | 0.15 |
| - | 6 | 4  | -4 | 14.24 | 0.56 |
| - | 6 | 4  | -4 | 13.58 | 0.62 |
|   | 6 | 4  | 4  | 14.74 | 0.72 |
| - | 6 | -4 | -4 | 14.54 | 0.60 |
| - | 6 | -4 | -4 | 14.38 | 0.53 |
|   | 6 | 4  | 5  | 24.22 | 1.08 |
| - | 6 | 4  | -5 | 23.26 | 0.86 |
| - | 6 | 4  | -5 | 23.13 | 0.93 |
|   | 6 | -4 | 5  | 23.09 | 1.06 |
| - | 6 | -4 | -5 | 23.60 | 0.84 |
| - | 6 | -4 | -5 | 22.72 | 0.91 |
| - | 6 | 4  | -6 | -0.35 | 0.20 |
|   | 6 | 4  | 6  | 0.06  | 0.25 |
| - | 6 | 4  | -6 | 0.19  | 0.18 |
| - | 6 | -4 | -6 | -0.21 | 0.20 |
|   | 6 | -4 | 6  | 0.13  | 0.25 |
| - | 6 | -4 | -6 | -0.17 | 0.15 |
| - | 6 | 4  | -7 | 1.15  | 0.21 |
| - | 6 | 4  | -7 | 0.77  | 0.24 |
|   | 6 | 4  | 7  | 1.42  | 0.29 |

|   |   |    |     |       |      |
|---|---|----|-----|-------|------|
| - | 6 | -4 | -7  | 0.98  | 0.18 |
| - | 6 | -4 | -7  | 1.05  | 0.23 |
|   | 6 | -4 | 7   | 1.23  | 0.31 |
| - | 6 | 4  | -8  | -0.13 | 0.22 |
|   | 6 | 4  | 8   | 0.20  | 0.31 |
| - | 6 | 4  | -8  | -0.52 | 0.24 |
| - | 6 | -4 | -8  | 0.17  | 0.24 |
|   | 6 | -4 | 8   | 0.18  | 0.29 |
| - | 6 | 4  | -9  | 10.96 | 0.57 |
|   | 6 | 4  | 9   | 13.23 | 0.72 |
|   | 6 | -4 | 9   | 11.42 | 0.72 |
| - | 6 | -4 | -9  | 11.59 | 0.62 |
|   | 6 | 4  | 10  | 24.89 | 1.13 |
| - | 6 | 4  | -10 | 21.57 | 0.89 |
|   | 6 | -4 | 10  | 21.98 | 1.13 |
| - | 6 | 4  | -11 | 1.48  | 0.33 |
|   | 6 | -4 | 11  | 1.74  | 0.43 |
| - | 6 | 4  | -12 | 0.01  | 0.33 |
|   | 6 | -4 | 12  | 0.48  | 0.43 |
|   | 6 | 5  | -14 | 2.56  | 0.40 |
| - | 6 | -5 | 14  | 2.78  | 0.40 |
|   | 6 | -5 | -14 | 2.24  | 0.40 |
|   | 6 | 5  | -13 | 0.59  | 0.32 |
|   | 6 | 5  | -13 | -0.13 | 0.32 |
|   | 6 | -5 | -13 | 0.08  | 0.31 |
|   | 6 | 5  | -12 | 12.90 | 0.65 |
|   | 6 | 5  | -12 | 12.80 | 0.73 |
|   | 6 | -5 | -12 | 13.48 | 0.63 |
|   | 6 | 5  | -11 | 4.99  | 0.46 |
|   | 6 | 5  | -11 | 5.01  | 0.42 |
|   | 6 | -5 | -11 | 4.77  | 0.46 |
|   | 6 | 5  | -10 | 0.91  | 0.27 |
|   | 6 | 5  | -10 | 1.05  | 0.24 |
|   | 6 | -5 | -10 | 0.66  | 0.27 |
|   | 6 | 5  | -9  | 0.18  | 0.19 |
|   | 6 | 5  | -9  | -0.02 | 0.25 |
|   | 6 | -5 | -9  | -0.15 | 0.22 |
|   | 6 | 5  | -8  | 6.23  | 0.35 |
|   | 6 | 5  | -8  | 6.03  | 0.41 |
|   | 6 | -5 | -8  | 6.50  | 0.42 |
|   | 6 | 5  | -7  | 4.48  | 0.28 |
|   | 6 | 5  | -7  | 4.22  | 0.35 |
|   | 6 | -5 | -7  | 4.39  | 0.37 |
| - | 6 | 5  | 6   | 6.04  | 0.31 |
|   | 6 | 5  | -6  | 6.23  | 0.30 |
|   | 6 | 5  | -6  | 6.29  | 0.38 |
|   | 6 | -5 | -6  | 5.83  | 0.32 |
|   | 6 | -5 | -6  | 6.55  | 0.34 |
| - | 6 | -5 | 6   | 5.93  | 0.27 |
| - | 6 | 5  | 5   | 20.10 | 0.76 |
|   | 6 | 5  | -5  | 20.64 | 0.72 |
|   | 6 | 5  | -5  | 19.93 | 0.90 |
|   | 6 | -5 | -5  | 21.27 | 0.76 |
| - | 6 | -5 | 5   | 19.47 | 0.74 |

|   |    |    |       |       |
|---|----|----|-------|-------|
| 6 | -5 | -5 | 19.25 | 0.87  |
| - | 6  | 5  | 4     | 0.09  |
| 6 | 5  | -4 | 0.23  | 0.16  |
| - | 6  | -5 | 4     | -0.01 |
| 6 | -5 | -4 | 0.02  | 0.14  |
| 6 | -5 | -4 | 0.42  | 0.11  |
| - | 6  | 5  | 3     | 0.56  |
| 6 | 5  | -3 | 0.71  | 0.08  |
| - | 6  | -5 | 3     | 0.47  |
| 6 | -5 | -3 | 0.50  | 0.13  |
| 6 | -5 | -3 | 0.52  | 0.14  |
| 6 | 5  | -2 | 37.81 | 1.60  |
| 6 | 5  | -2 | 37.25 | 1.26  |
| - | 6  | 5  | 2     | 38.47 |
| 6 | -5 | -2 | 35.57 | 1.58  |
| - | 6  | -5 | 2     | 36.89 |
| 6 | -5 | -2 | 36.61 | 1.30  |
| 6 | 5  | -1 | 5.00  | 0.33  |
| - | 6  | -5 | 1     | 4.47  |
| 6 | -5 | -1 | 4.33  | 0.31  |
| 6 | -5 | -1 | 4.41  | 0.26  |
| 6 | 5  | 0  | 11.87 | 0.59  |
| - | 6  | 5  | 0     | 11.92 |
| 6 | -5 | 0  | 11.75 | 0.57  |
| - | 6  | -5 | 0     | 11.49 |
| 6 | -5 | 0  | 12.26 | 0.48  |
| 6 | 5  | 1  | 6.43  | 0.47  |
| - | 6  | 5  | -1    | 7.83  |
| 6 | -5 | 1  | 7.49  | 0.42  |
| - | 6  | -5 | -1    | 7.60  |
| - | 6  | 5  | -2    | 2.79  |
| 6 | 5  | 2  | 2.62  | 0.27  |
| 6 | -5 | 2  | 2.93  | 0.31  |
| 6 | 5  | 3  | 4.09  | 0.39  |
| - | 6  | 5  | -3    | 4.65  |
| - | 6  | -5 | -3    | 4.41  |
| - | 6  | -5 | -3    | 3.70  |
| 6 | -5 | 3  | 4.70  | 0.33  |
| 6 | 5  | 4  | 11.58 | 0.60  |
| - | 6  | 5  | -4    | 10.87 |
| - | 6  | 5  | -4    | 10.23 |
| - | 6  | -5 | -4    | 10.77 |
| - | 6  | -5 | -4    | 11.23 |
| 6 | -5 | 4  | 11.44 | 0.59  |
| 6 | 5  | 5  | 22.03 | 0.98  |
| - | 6  | 5  | -5    | 20.70 |
| - | 6  | 5  | -5    | 20.34 |
| - | 6  | -5 | -5    | 21.07 |
| 6 | -5 | 5  | 21.41 | 0.99  |
| - | 6  | 5  | -6    | 4.74  |
| 6 | 5  | 6  | 5.06  | 0.43  |
| - | 6  | 5  | -6    | 3.73  |
| - | 6  | -5 | -6    | 4.25  |
| 6 | -5 | 6  | 5.26  | 0.45  |

|   |    |        |       |      |
|---|----|--------|-------|------|
| 6 | 5  | 7      | 7.31  | 0.50 |
| - | 6  | 5 -7   | 4.84  | 0.42 |
| - | 6  | 5 -7   | 5.95  | 0.35 |
| - | 6  | -5 -7  | 6.43  | 0.39 |
| 6 | -5 | 7      | 6.82  | 0.50 |
| 6 | 5  | 8      | 10.42 | 0.60 |
| - | 6  | 5 -8   | 8.26  | 0.44 |
| 6 | -5 | 8      | 8.28  | 0.56 |
| - | 6  | -5 -8  | 8.84  | 0.52 |
| - | 6  | 5 -9   | 0.51  | 0.27 |
| 6 | 5  | 9      | 0.84  | 0.32 |
| - | 6  | -5 -9  | 0.39  | 0.29 |
| 6 | -5 | 9      | 0.38  | 0.35 |
| - | 6  | 5 -10  | 0.93  | 0.30 |
| - | 6  | -5 -10 | 0.98  | 0.31 |
| 6 | -5 | 10     | 1.00  | 0.39 |
| - | 6  | 5 -11  | 0.22  | 0.32 |
| 6 | -5 | 11     | 0.59  | 0.42 |
| - | 6  | 5 -12  | 0.33  | 0.35 |
| 6 | 6  | -14    | 0.99  | 0.38 |
| 6 | -6 | -14    | 0.64  | 0.37 |
| - | 6  | -6 14  | 0.85  | 0.37 |
| 6 | 6  | -13    | 0.77  | 0.34 |
| 6 | 6  | -13    | 0.74  | 0.34 |
| 6 | -6 | -13    | 0.62  | 0.34 |
| 6 | 6  | -12    | 2.64  | 0.36 |
| 6 | 6  | -12    | 2.84  | 0.31 |
| 6 | -6 | -12    | 2.71  | 0.35 |
| 6 | 6  | -11    | 0.48  | 0.30 |
| 6 | 6  | -11    | 0.55  | 0.27 |
| 6 | -6 | -11    | 0.33  | 0.28 |
| 6 | 6  | -10    | 4.34  | 0.45 |
| 6 | 6  | -10    | 4.63  | 0.38 |
| 6 | -6 | -10    | 4.23  | 0.43 |
| 6 | 6  | -9     | 12.75 | 0.68 |
| 6 | 6  | -9     | 13.64 | 0.57 |
| 6 | -6 | -9     | 13.17 | 0.59 |
| 6 | 6  | -8     | 3.24  | 0.40 |
| 6 | 6  | -8     | 3.62  | 0.30 |
| 6 | -6 | -8     | 3.84  | 0.33 |
| 6 | 6  | -7     | 30.30 | 1.37 |
| 6 | 6  | -7     | 29.55 | 1.09 |
| 6 | -6 | -7     | 32.15 | 1.13 |
| 6 | 6  | -6     | 0.14  | 0.21 |
| 6 | 6  | -6     | 0.23  | 0.13 |
| - | 6  | 6 6    | 0.15  | 0.14 |
| 6 | -6 | -6     | 0.13  | 0.19 |
| 6 | 6  | -5     | 6.16  | 0.28 |
| - | 6  | 6 5    | 5.98  | 0.32 |
| 6 | -6 | -5     | 6.02  | 0.31 |
| 6 | -6 | -5     | 6.31  | 0.36 |
| - | 6  | -6 5   | 6.04  | 0.28 |
| - | 6  | 6 4    | 6.89  | 0.35 |
| - | 6  | -6 4   | 7.04  | 0.31 |

|   |    |    |       |       |      |
|---|----|----|-------|-------|------|
| 6 | -6 | -4 | 7.55  | 0.35  |      |
| 6 | -6 | -4 | 7.09  | 0.35  |      |
| 6 | 6  | -3 | 47.48 | 2.23  |      |
| 6 | 6  | -3 | 54.07 | 1.78  |      |
| - | 6  | 6  | 3     | 54.01 | 1.89 |
| 6 | -6 | -3 | 54.44 | 1.81  |      |
| - | 6  | -6 | 3     | 52.55 | 1.88 |
| 6 | -6 | -3 | 51.06 | 2.20  |      |
| - | 6  | 6  | 2     | 6.68  | 0.31 |
| 6 | 6  | -2 | 6.06  | 0.24  |      |
| 6 | 6  | -2 | 7.34  | 0.42  |      |
| 6 | -6 | -2 | 6.24  | 0.36  |      |
| - | 6  | -6 | 2     | 6.58  | 0.30 |
| 6 | 6  | -1 | 1.03  | 0.20  |      |
| - | 6  | -6 | 1     | 0.45  | 0.13 |
| 6 | -6 | -1 | 0.49  | 0.14  |      |
| 6 | -6 | -1 | 0.26  | 0.17  |      |
| - | 6  | 6  | 0     | 17.58 | 0.68 |
| 6 | 6  | 0  | 17.62 | 0.83  |      |
| - | 6  | -6 | 0     | 17.20 | 0.66 |
| 6 | -6 | 0  | 17.20 | 0.64  |      |
| 6 | -6 | 0  | 16.75 | 0.78  |      |
| - | 6  | 6  | -1    | 26.63 | 1.00 |
| 6 | 6  | 1  | 25.69 | 1.18  |      |
| 6 | -6 | 1  | 26.61 | 1.16  |      |
| - | 6  | -6 | -1    | 26.95 | 0.99 |
| - | 6  | 6  | -2    | 1.02  | 0.17 |
| 6 | 6  | 2  | 0.42  | 0.22  |      |
| 6 | -6 | 2  | 0.99  | 0.19  |      |
| 6 | 6  | 3  | 1.66  | 0.25  |      |
| - | 6  | 6  | -3    | 1.62  | 0.18 |
| 6 | -6 | 3  | 1.48  | 0.22  |      |
| - | 6  | -6 | -3    | 0.95  | 0.16 |
| - | 6  | 6  | -4    | 0.44  | 0.17 |
| - | 6  | 6  | -4    | 0.74  | 0.19 |
| 6 | 6  | 4  | 0.53  | 0.23  |      |
| 6 | -6 | 4  | 0.68  | 0.24  |      |
| - | 6  | -6 | -4    | 0.83  | 0.19 |
| 6 | 6  | 5  | 30.04 | 1.23  |      |
| - | 6  | 6  | -5    | 26.18 | 1.05 |
| - | 6  | 6  | -5    | 26.92 | 0.99 |
| 6 | -6 | 5  | 26.32 | 1.21  |      |
| - | 6  | -6 | -5    | 26.53 | 1.05 |
| 6 | 6  | 6  | 17.05 | 0.79  |      |
| - | 6  | 6  | -6    | 15.67 | 0.62 |
| - | 6  | 6  | -6    | 14.89 | 0.68 |
| 6 | -6 | 6  | 15.04 | 0.77  |      |
| - | 6  | -6 | -6    | 15.81 | 0.68 |
| - | 6  | 6  | -7    | 5.93  | 0.42 |
| 6 | 6  | 7  | 7.30  | 0.52  |      |
| - | 6  | 6  | -7    | 5.98  | 0.37 |
| 6 | -6 | 7  | 6.57  | 0.51  |      |
| - | 6  | -6 | -7    | 6.25  | 0.44 |
| 6 | 6  | 8  | 5.84  | 0.47  |      |

|   |   |    |     |       |      |
|---|---|----|-----|-------|------|
| - | 6 | 6  | -8  | 4.43  | 0.35 |
|   | 6 | -6 | 8   | 4.07  | 0.44 |
| - | 6 | -6 | -8  | 4.24  | 0.43 |
| - | 6 | 6  | -9  | 1.04  | 0.28 |
| - | 6 | -6 | -9  | 0.86  | 0.28 |
|   | 6 | -6 | 9   | 0.79  | 0.36 |
| - | 6 | 6  | -10 | 2.24  | 0.33 |
|   | 6 | -6 | 10  | 2.69  | 0.42 |
| - | 6 | -6 | -10 | 2.55  | 0.34 |
| - | 6 | 6  | -11 | 1.00  | 0.33 |
|   | 6 | -6 | 11  | 1.10  | 0.42 |
|   | 6 | 7  | -14 | 0.04  | 0.34 |
| - | 6 | -7 | 14  | -0.21 | 0.38 |
|   | 6 | -7 | -14 | -0.45 | 0.37 |
|   | 6 | 7  | -13 | 0.96  | 0.34 |
|   | 6 | 7  | -13 | 0.75  | 0.36 |
|   | 6 | -7 | -13 | 0.33  | 0.35 |
|   | 6 | 7  | -12 | 2.05  | 0.36 |
|   | 6 | 7  | -12 | 1.85  | 0.32 |
|   | 6 | -7 | -12 | 1.31  | 0.33 |
|   | 6 | 7  | -11 | 1.19  | 0.33 |
|   | 6 | 7  | -11 | 1.38  | 0.27 |
|   | 6 | -7 | -11 | 1.35  | 0.31 |
|   | 6 | 7  | -10 | 6.58  | 0.52 |
|   | 6 | 7  | -10 | 6.67  | 0.42 |
|   | 6 | -7 | -10 | 6.57  | 0.43 |
|   | 6 | 7  | -9  | 1.47  | 0.27 |
|   | 6 | 7  | -9  | 1.54  | 0.22 |
|   | 6 | -7 | -9  | 1.25  | 0.25 |
|   | 6 | 7  | -8  | 2.57  | 0.31 |
|   | 6 | 7  | -8  | 3.23  | 0.28 |
|   | 6 | -7 | -8  | 2.43  | 0.27 |
|   | 6 | 7  | -7  | 0.05  | 0.15 |
|   | 6 | 7  | -7  | 0.03  | 0.24 |
|   | 6 | -7 | -7  | -0.02 | 0.21 |
|   | 6 | 7  | -6  | 39.91 | 1.39 |
|   | 6 | 7  | -6  | 40.19 | 1.74 |
| - | 6 | 7  | 6   | 39.24 | 1.47 |
|   | 6 | -7 | -6  | 40.55 | 1.42 |
| - | 6 | 7  | 5   | 3.43  | 0.26 |
|   | 6 | 7  | -5  | 3.51  | 0.21 |
|   | 6 | -7 | -5  | 2.85  | 0.26 |
| - | 6 | -7 | 5   | 3.39  | 0.21 |
| - | 6 | 7  | 4   | -0.02 | 0.14 |
|   | 6 | 7  | -4  | 0.05  | 0.05 |
| - | 6 | -7 | 4   | 0.06  | 0.11 |
|   | 6 | -7 | -4  | 0.35  | 0.11 |
|   | 6 | -7 | -4  | -0.12 | 0.14 |
|   | 6 | 7  | -3  | 12.41 | 0.59 |
|   | 6 | 7  | -3  | 11.64 | 0.43 |
| - | 6 | 7  | 3   | 12.18 | 0.49 |
| - | 6 | -7 | 3   | 11.68 | 0.48 |
|   | 6 | -7 | -3  | 12.57 | 0.50 |
|   | 6 | -7 | -3  | 10.83 | 0.54 |

|   |   |    |     |       |      |
|---|---|----|-----|-------|------|
| - | 6 | 7  | 2   | 8.23  | 0.40 |
|   | 6 | 7  | -2  | 9.92  | 0.49 |
| - | 6 | -7 | 2   | 8.70  | 0.38 |
|   | 6 | -7 | -2  | 8.89  | 0.45 |
|   | 6 | -7 | -2  | 8.89  | 0.41 |
|   | 6 | 7  | -1  | 26.49 | 1.16 |
|   | 6 | -7 | -1  | 26.25 | 0.95 |
|   | 6 | -7 | -1  | 25.62 | 1.13 |
| - | 6 | -7 | 1   | 25.87 | 0.96 |
| - | 6 | 7  | 0   | 7.88  | 0.38 |
|   | 6 | 7  | 0   | 7.63  | 0.47 |
|   | 6 | -7 | 0   | 7.22  | 0.41 |
| - | 6 | -7 | 0   | 7.12  | 0.34 |
|   | 6 | -7 | 0   | 7.37  | 0.35 |
| - | 6 | 7  | -1  | 11.84 | 0.50 |
|   | 6 | 7  | 1   | 11.33 | 0.62 |
| - | 6 | -7 | -1  | 10.98 | 0.49 |
|   | 6 | -7 | 1   | 10.84 | 0.56 |
|   | 6 | 7  | 2   | 13.21 | 0.71 |
| - | 6 | 7  | -2  | 14.77 | 0.60 |
|   | 6 | -7 | 2   | 13.93 | 0.66 |
|   | 6 | 7  | 3   | 0.91  | 0.24 |
| - | 6 | 7  | -3  | 1.53  | 0.18 |
|   | 6 | -7 | 3   | 1.53  | 0.24 |
| - | 6 | -7 | -3  | 1.34  | 0.17 |
| - | 6 | 7  | -4  | 11.41 | 0.54 |
|   | 6 | 7  | 4   | 11.80 | 0.65 |
| - | 6 | -7 | -4  | 11.41 | 0.53 |
|   | 6 | -7 | 4   | 11.78 | 0.62 |
|   | 6 | 7  | 5   | 1.11  | 0.25 |
| - | 6 | 7  | -5  | 1.11  | 0.21 |
| - | 6 | 7  | -5  | 0.99  | 0.20 |
| - | 6 | -7 | -5  | 0.88  | 0.20 |
|   | 6 | -7 | 5   | 1.03  | 0.25 |
| - | 6 | 7  | -6  | 9.80  | 0.47 |
|   | 6 | 7  | 6   | 12.18 | 0.62 |
| - | 6 | 7  | -6  | 10.00 | 0.52 |
|   | 6 | -7 | 6   | 10.41 | 0.62 |
| - | 6 | -7 | -6  | 10.87 | 0.54 |
|   | 6 | 7  | 7   | 2.60  | 0.30 |
| - | 6 | 7  | -7  | 1.95  | 0.24 |
| - | 6 | 7  | -7  | 1.66  | 0.24 |
|   | 6 | -7 | 7   | 2.09  | 0.33 |
| - | 6 | -7 | -7  | 1.95  | 0.27 |
|   | 6 | 7  | 8   | 5.73  | 0.52 |
| - | 6 | 7  | -8  | 4.67  | 0.37 |
| - | 6 | -7 | -8  | 4.44  | 0.39 |
|   | 6 | -7 | 8   | 5.44  | 0.50 |
| - | 6 | 7  | -9  | -0.22 | 0.27 |
| - | 6 | -7 | -9  | -0.08 | 0.27 |
|   | 6 | -7 | 9   | 0.25  | 0.36 |
| - | 6 | 7  | -10 | 1.88  | 0.30 |
| - | 6 | -7 | -10 | 1.96  | 0.33 |
|   | 6 | -7 | 10  | 1.85  | 0.42 |

|   |   |    |     |       |      |
|---|---|----|-----|-------|------|
| - | 6 | 7  | -11 | -0.07 | 0.33 |
|   | 6 | -7 | 11  | 0.29  | 0.38 |
|   | 6 | 8  | -14 | 0.33  | 0.38 |
|   | 6 | -8 | -14 | -0.49 | 0.36 |
| - | 6 | -8 | 14  | -0.43 | 0.40 |
|   | 6 | 8  | -13 | 6.45  | 0.54 |
|   | 6 | 8  | -13 | 6.07  | 0.59 |
|   | 6 | -8 | -13 | 5.94  | 0.49 |
|   | 6 | 8  | -12 | 1.02  | 0.31 |
|   | 6 | 8  | -12 | 1.10  | 0.36 |
|   | 6 | -8 | -12 | 1.05  | 0.34 |
|   | 6 | 8  | -11 | 1.42  | 0.35 |
|   | 6 | 8  | -11 | 1.54  | 0.29 |
|   | 6 | -8 | -11 | 1.03  | 0.32 |
|   | 6 | 8  | -10 | 0.58  | 0.24 |
|   | 6 | 8  | -10 | 0.17  | 0.31 |
|   | 6 | -8 | -10 | 0.19  | 0.26 |
|   | 6 | 8  | -9  | 9.55  | 0.59 |
|   | 6 | 8  | -9  | 10.13 | 0.48 |
|   | 6 | -8 | -9  | 10.22 | 0.51 |
|   | 6 | 8  | -8  | 3.89  | 0.44 |
|   | 6 | 8  | -8  | 3.84  | 0.30 |
|   | 6 | -8 | -8  | 3.70  | 0.35 |
|   | 6 | 8  | -7  | 0.38  | 0.24 |
|   | 6 | 8  | -7  | 0.32  | 0.16 |
|   | 6 | -8 | -7  | 0.14  | 0.22 |
|   | 6 | 8  | -6  | 0.33  | 0.24 |
|   | 6 | 8  | -6  | 0.10  | 0.14 |
|   | 6 | -8 | -6  | 0.28  | 0.18 |
|   | 6 | 8  | -5  | 51.38 | 1.67 |
| - | 6 | 8  | 5   | 49.81 | 1.76 |
| - | 6 | -8 | 5   | 50.07 | 1.74 |
|   | 6 | -8 | -5  | 42.27 | 1.69 |
|   | 6 | 8  | -4  | 4.03  | 0.37 |
| - | 6 | 8  | 4   | 4.86  | 0.30 |
| - | 6 | -8 | 4   | 4.52  | 0.25 |
| - | 6 | 8  | 3   | 14.94 | 0.60 |
|   | 6 | 8  | -3  | 15.79 | 0.74 |
|   | 6 | -8 | -3  | 14.20 | 0.67 |
| - | 6 | -8 | 3   | 15.11 | 0.59 |
|   | 6 | 8  | -2  | 21.69 | 0.93 |
|   | 6 | -8 | -2  | 19.33 | 0.88 |
|   | 6 | -8 | -2  | 18.41 | 0.73 |
| - | 6 | -8 | 2   | 20.15 | 0.75 |
|   | 6 | 8  | -1  | 0.40  | 0.21 |
| - | 6 | -8 | 1   | 0.14  | 0.14 |
|   | 6 | -8 | -1  | 0.20  | 0.15 |
|   | 6 | -8 | -1  | 0.10  | 0.17 |
| - | 6 | 8  | 0   | 0.34  | 0.16 |
|   | 6 | 8  | 0   | 0.48  | 0.21 |
|   | 6 | -8 | 0   | 0.10  | 0.17 |
|   | 6 | -8 | 0   | 0.43  | 0.16 |
| - | 6 | -8 | 0   | 0.22  | 0.14 |
| - | 6 | 8  | -1  | 38.09 | 1.45 |

|   |    |     |       |       |      |
|---|----|-----|-------|-------|------|
| 6 | 8  | 1   | 40.29 | 1.73  |      |
| - | 6  | -8  | -1    | 39.31 | 1.45 |
| 6 | -8 | 1   | 40.14 | 1.69  |      |
| - | 6  | 8   | -2    | 0.33  | 0.17 |
| 6 | 8  | 2   | 0.13  | 0.22  |      |
| 6 | -8 | 2   | 0.13  | 0.20  |      |
| - | 6  | -8  | -2    | 0.18  | 0.17 |
| - | 6  | 8   | -3    | 0.57  | 0.18 |
| 6 | 8  | 3   | -0.34 | 0.23  |      |
| 6 | -8 | 3   | 0.29  | 0.23  |      |
| - | 6  | -8  | -3    | 0.43  | 0.17 |
| 6 | 8  | 4   | 0.63  | 0.25  |      |
| - | 6  | 8   | -4    | 1.18  | 0.20 |
| - | 6  | -8  | -4    | 1.06  | 0.21 |
| 6 | -8 | 4   | 1.21  | 0.26  |      |
| - | 6  | 8   | -5    | 0.83  | 0.21 |
| - | 6  | 8   | -5    | 0.75  | 0.20 |
| 6 | 8  | 5   | 0.90  | 0.26  |      |
| - | 6  | -8  | -5    | 0.83  | 0.23 |
| 6 | -8 | 5   | 0.84  | 0.28  |      |
| - | 6  | 8   | -6    | 0.21  | 0.20 |
| 6 | 8  | 6   | 0.11  | 0.28  |      |
| - | 6  | 8   | -6    | 0.14  | 0.22 |
| - | 6  | -8  | -6    | 0.00  | 0.21 |
| 6 | -8 | 6   | 0.02  | 0.27  |      |
| - | 6  | 8   | -7    | 1.52  | 0.24 |
| 6 | 8  | 7   | 2.10  | 0.31  |      |
| 6 | -8 | 7   | 1.49  | 0.34  |      |
| - | 6  | -8  | -7    | 1.57  | 0.27 |
| - | 6  | 8   | -8    | -0.15 | 0.24 |
| - | 6  | -8  | -8    | 0.04  | 0.26 |
| 6 | -8 | 8   | 0.54  | 0.34  |      |
| - | 6  | 8   | -9    | 0.38  | 0.26 |
| 6 | -8 | 9   | 0.35  | 0.37  |      |
| - | 6  | -8  | -9    | 0.30  | 0.29 |
| - | 6  | 8   | -10   | 0.08  | 0.31 |
| - | 6  | -8  | -10   | 0.00  | 0.31 |
| 6 | -8 | 10  | 0.33  | 0.40  |      |
| - | 6  | 8   | -11   | 7.43  | 0.57 |
| 6 | -8 | 11  | 7.69  | 0.67  |      |
| 6 | 9  | -14 | 2.78  | 0.43  |      |
| 6 | 9  | -13 | 0.16  | 0.38  |      |
| 6 | 9  | -13 | 0.80  | 0.35  |      |
| 6 | -9 | -13 | 0.42  | 0.36  |      |
| 6 | 9  | -12 | 4.39  | 0.46  |      |
| 6 | 9  | -12 | 4.35  | 0.54  |      |
| 6 | -9 | -12 | 3.72  | 0.37  |      |
| 6 | 9  | -11 | 0.89  | 0.29  |      |
| 6 | 9  | -11 | 0.98  | 0.35  |      |
| 6 | -9 | -11 | 0.45  | 0.29  |      |
| 6 | 9  | -10 | 4.03  | 0.39  |      |
| 6 | 9  | -10 | 3.88  | 0.49  |      |
| 6 | -9 | -10 | 3.73  | 0.44  |      |
| 6 | 9  | -9  | 0.85  | 0.22  |      |

|   |    |    |       |       |
|---|----|----|-------|-------|
| 6 | 9  | -9 | 0.82  | 0.32  |
| 6 | -9 | -9 | 0.87  | 0.25  |
| 6 | 9  | -8 | 11.20 | 0.63  |
| 6 | 9  | -8 | 11.01 | 0.52  |
| 6 | -9 | -8 | 11.68 | 0.56  |
| 6 | 9  | -7 | 6.36  | 0.36  |
| 6 | 9  | -7 | 6.05  | 0.50  |
| 6 | -9 | -7 | 6.55  | 0.42  |
| 6 | 9  | -6 | 32.95 | 1.17  |
| 6 | 9  | -6 | 33.15 | 1.48  |
| 6 | -9 | -6 | 33.52 | 1.21  |
| - | 6  | 9  | 5     | 0.50  |
| 6 | 9  | -5 | 0.30  | 0.21  |
| - | 6  | -9 | 5     | 0.17  |
| 6 | -9 | -5 | 0.40  | 0.20  |
| 6 | 9  | -4 | 0.95  | 0.22  |
| - | 6  | 9  | 4     | 0.81  |
| - | 6  | -9 | 4     | 0.86  |
| 6 | -9 | -4 | 0.70  | 0.17  |
| - | 6  | 9  | 3     | 1.60  |
| 6 | 9  | -3 | 1.65  | 0.23  |
| 6 | -9 | -3 | 1.62  | 0.22  |
| - | 6  | -9 | 3     | 1.87  |
| 6 | 9  | -2 | 15.05 | 0.73  |
| 6 | -9 | -2 | 14.25 | 0.67  |
| - | 6  | -9 | 2     | 14.45 |
| 6 | 9  | -1 | 21.78 | 0.94  |
| - | 6  | -9 | 1     | 20.84 |
| 6 | -9 | -1 | 20.65 | 0.89  |
| 6 | -9 | -1 | 16.62 | 0.73  |
| 6 | 9  | 0  | 19.69 | 0.92  |
| - | 6  | 9  | 0     | 19.50 |
| 6 | -9 | 0  | 18.81 | 0.87  |
| 6 | -9 | 0  | 19.95 | 0.75  |
| - | 6  | -9 | 0     | 19.49 |
| - | 6  | 9  | -1    | 0.12  |
| 6 | 9  | 1  | 0.38  | 0.22  |
| 6 | -9 | 1  | -0.05 | 0.20  |
| - | 6  | -9 | -1    | -0.16 |
| 6 | 9  | 2  | 9.38  | 0.57  |
| - | 6  | 9  | -2    | 10.37 |
| - | 6  | -9 | -2    | 9.36  |
| 6 | -9 | 2  | 9.52  | 0.52  |
| - | 6  | 9  | -3    | 3.43  |
| 6 | 9  | 3  | 2.42  | 0.29  |
| - | 6  | -9 | -3    | 2.79  |
| 6 | -9 | 3  | 2.72  | 0.30  |
| - | 6  | 9  | -4    | 2.68  |
| 6 | 9  | 4  | 1.82  | 0.30  |
| 6 | -9 | 4  | 2.59  | 0.36  |
| - | 6  | -9 | -4    | 2.27  |
| 6 | 9  | 5  | 2.79  | 0.32  |
| - | 6  | 9  | -5    | 3.45  |
| - | 6  | -9 | -5    | 2.99  |

|   |     |     |       |      |      |
|---|-----|-----|-------|------|------|
| 6 | -9  | 5   | 3.12  | 0.40 |      |
| - | 6   | 9   | -6    | 4.31 | 0.37 |
| - | 6   | 9   | -6    | 4.03 | 0.36 |
| 6 | 9   | 6   | 4.00  | 0.49 |      |
| 6 | -9  | 6   | 4.13  | 0.45 |      |
| - | 6   | -9  | -6    | 4.09 | 0.39 |
| - | 6   | 9   | -7    | 0.85 | 0.26 |
| - | 6   | -9  | -7    | 1.22 | 0.27 |
| 6 | -9  | 7   | 1.00  | 0.34 |      |
| - | 6   | 9   | -8    | 6.65 | 0.43 |
| 6 | -9  | 8   | 6.63  | 0.52 |      |
| - | 6   | -9  | -8    | 7.23 | 0.50 |
| - | 6   | 9   | -9    | 1.61 | 0.30 |
| 6 | -9  | 9   | 1.76  | 0.40 |      |
| - | 6   | -9  | -9    | 1.95 | 0.32 |
| - | 6   | 9   | -10   | 0.85 | 0.33 |
| 6 | -9  | 10  | 0.84  | 0.38 |      |
| - | 6   | -9  | -10   | 0.63 | 0.33 |
| - | 6   | 9   | -11   | 1.08 | 0.33 |
| 6 | 10  | -14 | 1.18  | 0.41 |      |
| 6 | 10  | -13 | 5.25  | 0.61 |      |
| 6 | 10  | -13 | 5.12  | 0.54 |      |
| 6 | -10 | -13 | 4.62  | 0.53 |      |
| 6 | 10  | -12 | 0.73  | 0.32 |      |
| 6 | 10  | -12 | 0.80  | 0.39 |      |
| 6 | -10 | -12 | 0.16  | 0.34 |      |
| 6 | 10  | -11 | 0.50  | 0.29 |      |
| 6 | 10  | -11 | 0.47  | 0.33 |      |
| 6 | -10 | -11 | 0.34  | 0.32 |      |
| 6 | 10  | -10 | 0.97  | 0.35 |      |
| 6 | 10  | -10 | 0.99  | 0.28 |      |
| 6 | -10 | -10 | 0.84  | 0.28 |      |
| 6 | 10  | -9  | 21.93 | 0.86 |      |
| 6 | 10  | -9  | 20.85 | 1.04 |      |
| 6 | -10 | -9  | 22.00 | 0.86 |      |
| 6 | 10  | -8  | 1.37  | 0.22 |      |
| 6 | 10  | -8  | 1.24  | 0.30 |      |
| 6 | -10 | -8  | 1.22  | 0.25 |      |
| 6 | 10  | -7  | 7.25  | 0.51 |      |
| 6 | -10 | -7  | 8.21  | 0.47 |      |
| 6 | 10  | -6  | 1.58  | 0.30 |      |
| 6 | -10 | -6  | 1.31  | 0.24 |      |
| 6 | 10  | -5  | 7.07  | 0.49 |      |
| 6 | -10 | -5  | 6.75  | 0.38 |      |
| 6 | 10  | -4  | 0.57  | 0.25 |      |
| - | 6   | 10  | 4     | 0.61 | 0.18 |
| 6 | -10 | -4  | 0.69  | 0.21 |      |
| - | 6   | -10 | 4     | 0.60 | 0.14 |
| 6 | 10  | -3  | 5.42  | 0.43 |      |
| - | 6   | 10  | 3     | 5.01 | 0.31 |
| 6 | -10 | -3  | 4.91  | 0.32 |      |
| - | 6   | -10 | 3     | 5.50 | 0.30 |
| - | 6   | 10  | 2     | 0.58 | 0.18 |
| 6 | 10  | -2  | 1.16  | 0.24 |      |

|   |     |     |       |       |
|---|-----|-----|-------|-------|
| 6 | -10 | -2  | 0.47  | 0.18  |
| - | 6   | -10 | 2     | 0.86  |
| 6 | -10 | -2  | 0.90  | 0.17  |
| - | 6   | 10  | 1     | 14.52 |
| 6 | 10  | -1  | 15.52 | 0.73  |
| - | 6   | -10 | 1     | 14.49 |
| 6 | -10 | -1  | 13.38 | 0.57  |
| 6 | -10 | -1  | 13.95 | 0.67  |
| - | 6   | 10  | 0     | 0.10  |
| 6 | 10  | 0   | 0.40  | 0.23  |
| - | 6   | -10 | 0     | 0.16  |
| 6 | -10 | 0   | 0.21  | 0.19  |
| 6 | -10 | 0   | 0.07  | 0.19  |
| 6 | 10  | 1   | 1.80  | 0.26  |
| - | 6   | 10  | -1    | 1.77  |
| - | 6   | -10 | -1    | 1.43  |
| 6 | -10 | 1   | 1.67  | 0.22  |
| - | 6   | 10  | -2    | 0.27  |
| 6 | 10  | 2   | 0.04  | 0.23  |
| - | 6   | -10 | -2    | -0.16 |
| 6 | -10 | 2   | -0.09 | 0.21  |
| 6 | 10  | 3   | 0.53  | 0.27  |
| - | 6   | 10  | -3    | 0.96  |
| 6 | -10 | 3   | 0.87  | 0.22  |
| - | 6   | -10 | -3    | 1.03  |
| - | 6   | 10  | -4    | 0.32  |
| 6 | 10  | 4   | -0.40 | 0.25  |
| - | 6   | -10 | -4    | 0.27  |
| 6 | -10 | 4   | 0.20  | 0.26  |
| - | 6   | 10  | -5    | 13.33 |
| 6 | 10  | 5   | 13.68 | 0.75  |
| 6 | -10 | 5   | 12.85 | 0.71  |
| - | 6   | -10 | -5    | 13.17 |
| - | 6   | 10  | -6    | 3.64  |
| 6 | -10 | 6   | 3.82  | 0.46  |
| - | 6   | -10 | -6    | 3.43  |
| - | 6   | 10  | -7    | 3.60  |
| - | 6   | -10 | -7    | 2.63  |
| 6 | -10 | 7   | 3.85  | 0.48  |
| - | 6   | 10  | -8    | 0.22  |
| - | 6   | -10 | -8    | 0.17  |
| 6 | -10 | 8   | 0.18  | 0.36  |
| - | 6   | 10  | -9    | 1.18  |
| - | 6   | -10 | -9    | 1.24  |
| 6 | -10 | 9   | 1.45  | 0.41  |
| - | 6   | 10  | -10   | 0.80  |
| 6 | -10 | 10  | 0.84  | 0.43  |
| - | 6   | -10 | -10   | 0.93  |
| 6 | 11  | -13 | 1.16  | 0.44  |
| 6 | 11  | -13 | 1.34  | 0.39  |
| 6 | -11 | -13 | 1.15  | 0.38  |
| 6 | 11  | -12 | 1.20  | 0.38  |
| 6 | 11  | -12 | 0.90  | 0.34  |
| 6 | -11 | -12 | 0.80  | 0.35  |

|   |     |     |       |            |
|---|-----|-----|-------|------------|
| 6 | 11  | -11 | 1.27  | 0.32       |
| 6 | 11  | -11 | 1.27  | 0.39       |
| 6 | -11 | -11 | 0.41  | 0.33       |
| 6 | 11  | -10 | 5.78  | 0.52       |
| 6 | -11 | -10 | 6.35  | 0.45       |
| 6 | 11  | -9  | 0.09  | 0.30       |
| 6 | -11 | -9  | 0.11  | 0.26       |
| 6 | 11  | -8  | 0.15  | 0.32       |
| 6 | -11 | -8  | -0.13 | 0.24       |
| 6 | 11  | -7  | 0.75  | 0.31       |
| 6 | -11 | -7  | 0.83  | 0.24       |
| 6 | 11  | -6  | 3.48  | 0.45       |
| 6 | -11 | -6  | 3.62  | 0.33       |
| 6 | 11  | -5  | 1.73  | 0.30       |
| 6 | -11 | -5  | 1.59  | 0.24       |
| - | 6   | 11  | 4     | 0.08 0.19  |
| 6 | 11  | -4  | 0.21  | 0.23       |
| 6 | -11 | -4  | -0.06 | 0.19       |
| - | 6   | -11 | 4     | 0.08 0.13  |
| 6 | 11  | -3  | 1.57  | 0.27       |
| - | 6   | 11  | 3     | 1.45 0.19  |
| - | 6   | -11 | 3     | 1.64 0.17  |
| 6 | -11 | -3  | 1.34  | 0.21       |
| - | 6   | 11  | 2     | 31.56 1.22 |
| 6 | 11  | -2  | 33.67 | 1.46       |
| - | 6   | -11 | 2     | 33.26 1.22 |
| 6 | -11 | -2  | 32.09 | 1.17       |
| - | 6   | 11  | 1     | 1.86 0.21  |
| 6 | 11  | -1  | 2.14  | 0.27       |
| 6 | -11 | -1  | 1.94  | 0.26       |
| - | 6   | -11 | 1     | 2.43 0.27  |
| 6 | -11 | -1  | 2.07  | 0.23       |
| 6 | 11  | 0   | 0.32  | 0.24       |
| - | 6   | 11  | 0     | 0.37 0.19  |
| 6 | -11 | 0   | 0.48  | 0.19       |
| - | 6   | -11 | 0     | 0.18 0.18  |
| 6 | -11 | 0   | 0.29  | 0.20       |
| - | 6   | 11  | -1    | 1.77 0.22  |
| 6 | 11  | 1   | 2.08  | 0.28       |
| 6 | -11 | 1   | 1.58  | 0.23       |
| - | 6   | -11 | -1    | 1.63 0.21  |
| - | 6   | 11  | -2    | 1.02 0.21  |
| 6 | 11  | 2   | 0.83  | 0.25       |
| 6 | -11 | 2   | 0.82  | 0.25       |
| - | 6   | -11 | -2    | 0.74 0.21  |
| - | 6   | 11  | -3    | 7.28 0.43  |
| 6 | 11  | 3   | 6.81  | 0.53       |
| - | 6   | -11 | -3    | 7.38 0.43  |
| 6 | -11 | 3   | 7.51  | 0.48       |
| 6 | 11  | 4   | 13.69 | 0.74       |
| - | 6   | 11  | -4    | 13.32 0.61 |
| - | 6   | -11 | -4    | 13.68 0.60 |
| 6 | -11 | 4   | 13.64 | 0.71       |
| - | 6   | 11  | -5    | 0.52 0.22  |

|   |   |     |     |       |      |
|---|---|-----|-----|-------|------|
| - | 6 | -11 | -5  | 0.55  | 0.24 |
|   | 6 | -11 | 5   | 0.82  | 0.31 |
| - | 6 | 11  | -6  | 0.55  | 0.22 |
| - | 6 | -11 | -6  | 0.29  | 0.24 |
|   | 6 | -11 | 6   | 0.47  | 0.33 |
| - | 6 | -11 | -7  | 0.12  | 0.25 |
|   | 6 | -11 | 7   | 0.14  | 0.35 |
| - | 6 | 11  | -8  | 1.05  | 0.31 |
|   | 6 | -11 | 8   | 1.22  | 0.39 |
| - | 6 | -11 | -8  | 0.99  | 0.31 |
| - | 6 | 11  | -9  | 0.17  | 0.29 |
| - | 6 | -11 | -9  | 0.04  | 0.32 |
|   | 6 | -11 | 9   | -0.02 | 0.41 |
| - | 6 | 11  | -10 | 0.18  | 0.35 |
|   | 6 | -11 | 10  | 0.67  | 0.45 |
| - | 6 | -11 | -10 | 0.20  | 0.36 |
|   | 6 | 12  | -12 | 0.38  | 0.42 |
|   | 6 | -12 | -12 | 0.13  | 0.35 |
|   | 6 | 12  | -11 | 2.81  | 0.45 |
|   | 6 | -12 | -11 | 2.40  | 0.34 |
|   | 6 | 12  | -10 | 0.20  | 0.38 |
|   | 6 | -12 | -10 | 0.19  | 0.31 |
|   | 6 | 12  | -9  | 0.47  | 0.35 |
|   | 6 | -12 | -9  | 0.23  | 0.29 |
|   | 6 | 12  | -8  | 0.20  | 0.33 |
|   | 6 | -12 | -8  | 0.09  | 0.27 |
|   | 6 | 12  | -7  | 1.12  | 0.33 |
|   | 6 | -12 | -7  | 1.04  | 0.27 |
|   | 6 | 12  | -6  | 0.83  | 0.28 |
|   | 6 | -12 | -6  | 0.95  | 0.23 |
|   | 6 | 12  | -5  | 4.30  | 0.47 |
|   | 6 | -12 | -5  | 4.02  | 0.34 |
|   | 6 | 12  | -4  | 1.75  | 0.29 |
| - | 6 | -12 | 4   | 1.20  | 0.17 |
|   | 6 | -12 | -4  | 1.65  | 0.22 |
| - | 6 | 12  | 3   | 5.18  | 0.36 |
|   | 6 | 12  | -3  | 5.50  | 0.46 |
|   | 6 | -12 | -3  | 4.62  | 0.39 |
| - | 6 | -12 | 3   | 5.18  | 0.31 |
| - | 6 | 12  | 2   | 1.60  | 0.20 |
|   | 6 | 12  | -2  | 1.51  | 0.27 |
| - | 6 | -12 | 2   | 1.25  | 0.18 |
|   | 6 | -12 | -2  | 0.93  | 0.21 |
|   | 6 | 12  | -1  | 0.44  | 0.25 |
| - | 6 | 12  | 1   | 0.00  | 0.20 |
|   | 6 | -12 | -1  | 0.07  | 0.20 |
| - | 6 | -12 | 1   | 0.10  | 0.18 |
|   | 6 | 12  | 0   | 13.26 | 0.71 |
| - | 6 | 12  | 0   | 13.68 | 0.61 |
| - | 6 | -12 | 0   | 13.34 | 0.57 |
|   | 6 | -12 | 0   | 13.77 | 0.59 |
|   | 6 | -12 | 0   | 13.08 | 0.65 |
| - | 6 | 12  | -1  | 18.62 | 0.79 |
|   | 6 | 12  | 1   | 20.59 | 0.96 |

|   |   |     |     |       |      |
|---|---|-----|-----|-------|------|
| - | 6 | -12 | -1  | 20.13 | 0.79 |
|   | 6 | -12 | 1   | 19.03 | 0.76 |
|   | 6 | -12 | 1   | 19.31 | 0.90 |
|   | 6 | 12  | 2   | 34.53 | 1.52 |
| - | 6 | 12  | -2  | 33.35 | 1.30 |
|   | 6 | -12 | 2   | 34.01 | 1.49 |
| - | 6 | -12 | -2  | 34.49 | 1.28 |
|   | 6 | 12  | 3   | 0.35  | 0.27 |
| - | 6 | 12  | -3  | 0.59  | 0.22 |
| - | 6 | -12 | -3  | 0.38  | 0.21 |
|   | 6 | -12 | 3   | 0.66  | 0.27 |
| - | 6 | 12  | -4  | -0.01 | 0.21 |
|   | 6 | -12 | 4   | 0.21  | 0.28 |
| - | 6 | -12 | -4  | -0.09 | 0.23 |
| - | 6 | 12  | -5  | 0.89  | 0.23 |
| - | 6 | -12 | -5  | 0.68  | 0.24 |
|   | 6 | -12 | 5   | 0.72  | 0.31 |
| - | 6 | -12 | -6  | 0.06  | 0.27 |
|   | 6 | -12 | 6   | 0.30  | 0.33 |
|   | 6 | -12 | 7   | 0.93  | 0.38 |
| - | 6 | -12 | -7  | 0.74  | 0.30 |
|   | 6 | -12 | 8   | 0.50  | 0.40 |
| - | 6 | -12 | -8  | -0.12 | 0.31 |
| - | 6 | 12  | -9  | 1.41  | 0.32 |
| - | 6 | -12 | -9  | 1.29  | 0.34 |
|   | 6 | -12 | 9   | 1.19  | 0.44 |
| - | 6 | -12 | -10 | 0.87  | 0.37 |
|   | 6 | 13  | -12 | 1.88  | 0.47 |
|   | 6 | -13 | -12 | 2.33  | 0.39 |
|   | 6 | 13  | -11 | 0.14  | 0.38 |
|   | 6 | -13 | -11 | -0.22 | 0.33 |
|   | 6 | 13  | -10 | 1.25  | 0.41 |
|   | 6 | -13 | -10 | 1.48  | 0.31 |
|   | 6 | 13  | -9  | 0.53  | 0.34 |
|   | 6 | -13 | -9  | 0.55  | 0.28 |
|   | 6 | 13  | -8  | 0.36  | 0.35 |
|   | 6 | -13 | -8  | 0.12  | 0.28 |
|   | 6 | 13  | -7  | 1.66  | 0.36 |
|   | 6 | -13 | -7  | 1.69  | 0.29 |
|   | 6 | 13  | -6  | 12.33 | 0.73 |
|   | 6 | -13 | -6  | 12.71 | 0.60 |
|   | 6 | 13  | -5  | 2.02  | 0.34 |
|   | 6 | -13 | -5  | 1.82  | 0.25 |
|   | 6 | 13  | -4  | 1.40  | 0.30 |
|   | 6 | -13 | -4  | 1.12  | 0.23 |
| - | 6 | -13 | 4   | 1.40  | 0.19 |
|   | 6 | 13  | -3  | 0.95  | 0.28 |
|   | 6 | -13 | -3  | 0.68  | 0.22 |
| - | 6 | -13 | 3   | 0.97  | 0.19 |
|   | 6 | 13  | -2  | 1.51  | 0.28 |
| - | 6 | 13  | 2   | 1.07  | 0.21 |
| - | 6 | -13 | 2   | 1.12  | 0.19 |
|   | 6 | -13 | -2  | 1.11  | 0.24 |
| - | 6 | 13  | 1   | 7.82  | 0.45 |

|   |     |     |       |      |      |
|---|-----|-----|-------|------|------|
| 6 | 13  | -1  | 7.47  | 0.51 |      |
| - | 6   | -13 | 1     | 7.61 | 0.41 |
| 6 | -13 | -1  | 7.79  | 0.42 |      |
| - | 6   | 13  | 0     | 0.49 | 0.20 |
| 6 | 13  | 0   | 0.61  | 0.25 |      |
| - | 6   | -13 | 0     | 0.49 | 0.19 |
| 6 | -13 | 0   | 0.52  | 0.22 |      |
| 6 | -13 | 0   | 0.46  | 0.21 |      |
| - | 6   | 13  | -1    | 1.22 | 0.22 |
| 6 | 13  | 1   | 1.43  | 0.27 |      |
| 6 | -13 | 1   | 1.39  | 0.24 |      |
| 6 | -13 | 1   | 1.33  | 0.25 |      |
| - | 6   | -13 | -1    | 1.39 | 0.23 |
| 6 | 13  | 2   | -0.13 | 0.27 |      |
| - | 6   | 13  | -2    | 0.26 | 0.23 |
| - | 6   | -13 | -2    | 0.13 | 0.21 |
| 6 | -13 | 2   | 0.30  | 0.26 |      |
| - | 6   | 13  | -3    | 1.23 | 0.24 |
| 6 | 13  | 3   | 0.78  | 0.29 |      |
| - | 6   | -13 | -3    | 0.95 | 0.23 |
| 6 | -13 | 3   | 0.71  | 0.28 |      |
| - | 6   | 13  | -4    | 5.73 | 0.42 |
| 6 | -13 | 4   | 5.64  | 0.50 |      |
| - | 6   | -13 | -4    | 5.68 | 0.39 |
| - | 6   | 13  | -5    | 0.18 | 0.23 |
| 6 | -13 | 5   | -0.06 | 0.31 |      |
| - | 6   | -13 | -5    | 0.04 | 0.24 |
| 6 | -13 | 6   | 0.49  | 0.35 |      |
| - | 6   | -13 | -6    | 0.53 | 0.28 |
| - | 6   | -13 | -7    | 0.32 | 0.30 |
| 6 | -13 | 7   | 0.40  | 0.34 |      |
| - | 6   | -13 | -8    | 0.25 | 0.32 |
| 6 | -13 | 8   | 0.97  | 0.42 |      |
| 6 | -13 | 9   | 1.07  | 0.45 |      |
| - | 6   | -13 | -9    | 0.90 | 0.32 |
| 6 | 14  | -11 | 0.36  | 0.43 |      |
| 6 | -14 | -11 | 0.21  | 0.35 |      |
| 6 | 14  | -10 | 3.44  | 0.47 |      |
| 6 | -14 | -10 | 3.01  | 0.37 |      |
| 6 | 14  | -9  | 3.53  | 0.45 |      |
| 6 | -14 | -9  | 3.68  | 0.37 |      |
| 6 | 14  | -8  | 1.55  | 0.36 |      |
| 6 | -14 | -8  | 1.74  | 0.29 |      |
| 6 | 14  | -7  | 0.71  | 0.36 |      |
| 6 | -14 | -7  | 0.86  | 0.29 |      |
| 6 | 14  | -6  | 0.83  | 0.31 |      |
| 6 | -14 | -6  | 0.60  | 0.27 |      |
| 6 | 14  | -5  | 0.38  | 0.32 |      |
| 6 | -14 | -5  | 0.34  | 0.24 |      |
| 6 | 14  | -4  | 11.00 | 0.68 |      |
| 6 | -14 | -4  | 11.61 | 0.56 |      |
| 6 | 14  | -3  | 0.26  | 0.27 |      |
| - | 6   | -14 | 3     | 0.09 | 0.19 |
| 6 | -14 | -3  | 0.08  | 0.22 |      |

|   |     |     |      |      |      |
|---|-----|-----|------|------|------|
| 6 | 14  | -2  | 1.53 | 0.29 |      |
| 6 | -14 | -2  | 1.20 | 0.24 |      |
| - | 6   | -14 | 2    | 1.43 | 0.21 |
| 6 | 14  | -1  | 1.58 | 0.29 |      |
| - | 6   | 14  | 1    | 1.24 | 0.24 |
| - | 6   | -14 | 1    | 1.39 | 0.22 |
| 6 | -14 | -1  | 1.32 | 0.24 |      |
| 6 | 14  | 0   | 4.07 | 0.43 |      |
| - | 6   | 14  | 0    | 3.97 | 0.35 |
| 6 | -14 | 0   | 4.28 | 0.40 |      |
| - | 6   | -14 | 0    | 4.04 | 0.36 |
| 6 | 14  | 1   | 4.25 | 0.43 |      |
| - | 6   | 14  | -1   | 3.93 | 0.39 |
| - | 6   | -14 | -1   | 4.36 | 0.34 |
| 6 | -14 | 1   | 4.17 | 0.39 |      |
| 6 | -14 | 1   | 4.12 | 0.37 |      |
| - | 6   | 14  | -2   | 3.78 | 0.39 |
| 6 | 14  | 2   | 3.77 | 0.43 |      |
| 6 | -14 | 2   | 3.71 | 0.42 |      |
| - | 6   | -14 | -2   | 4.05 | 0.38 |
| - | 6   | 14  | -3   | 0.05 | 0.23 |
| - | 6   | -14 | -3   | 0.15 | 0.25 |
| 6 | -14 | 3   | 0.15 | 0.28 |      |
| - | 6   | 14  | -4   | 1.63 | 0.26 |
| - | 6   | -14 | -4   | 1.82 | 0.28 |
| 6 | -14 | 4   | 2.04 | 0.33 |      |
| - | 6   | 14  | -5   | 1.38 | 0.28 |
| - | 6   | -14 | -5   | 1.20 | 0.29 |
| 6 | -14 | 5   | 1.45 | 0.34 |      |
| - | 6   | -14 | -6   | 5.72 | 0.44 |
| 6 | -14 | 6   | 6.01 | 0.55 |      |
| 6 | -14 | 7   | 0.21 | 0.39 |      |
| - | 6   | -14 | -7   | 0.13 | 0.28 |
| - | 6   | -14 | -8   | 0.31 | 0.34 |
| 6 | -14 | 8   | 0.27 | 0.43 |      |
| - | 6   | -14 | -9   | 0.36 | 0.36 |
| 6 | -15 | -11 | 2.48 | 0.38 |      |
| 6 | 15  | -10 | 0.95 | 0.44 |      |
| 6 | -15 | -10 | 0.94 | 0.35 |      |
| 6 | 15  | -9  | 0.54 | 0.41 |      |
| 6 | -15 | -9  | 0.43 | 0.33 |      |
| 6 | 15  | -8  | 5.23 | 0.58 |      |
| 6 | -15 | -8  | 5.66 | 0.50 |      |
| 6 | 15  | -7  | 0.94 | 0.37 |      |
| 6 | -15 | -7  | 0.58 | 0.28 |      |
| 6 | 15  | -6  | 1.87 | 0.38 |      |
| 6 | -15 | -6  | 2.06 | 0.31 |      |
| 6 | 15  | -5  | 2.25 | 0.36 |      |
| 6 | -15 | -5  | 1.94 | 0.30 |      |
| 6 | 15  | -4  | 4.32 | 0.49 |      |
| 6 | -15 | -4  | 4.29 | 0.42 |      |
| 6 | 15  | -3  | 3.66 | 0.46 |      |
| - | 6   | -15 | 3    | 3.13 | 0.32 |
| 6 | -15 | -3  | 3.06 | 0.31 |      |

|   |     |     |      |       |      |
|---|-----|-----|------|-------|------|
| 6 | 15  | -2  | 3.34 | 0.44  |      |
| 6 | -15 | -2  | 3.80 | 0.40  |      |
| - | 6   | -15 | 2    | 3.50  | 0.34 |
| 6 | 15  | -1  | 0.22 | 0.28  |      |
| 6 | -15 | -1  | 0.07 | 0.23  |      |
| - | 6   | -15 | 1    | 0.12  | 0.22 |
| 6 | 15  | 0   | 6.57 | 0.50  |      |
| - | 6   | 15  | 0    | 6.35  | 0.42 |
| - | 6   | -15 | 0    | 6.89  | 0.43 |
| 6 | -15 | 0   | 6.84 | 0.45  |      |
| 6 | 15  | 1   | 0.23 | 0.28  |      |
| - | 6   | 15  | -1   | 0.10  | 0.24 |
| 6 | -15 | 1   | 0.21 | 0.25  |      |
| - | 6   | -15 | -1   | -0.06 | 0.22 |
| - | 6   | 15  | -2   | 0.23  | 0.22 |
| - | 6   | -15 | -2   | 0.40  | 0.26 |
| 6 | -15 | 2   | 0.28 | 0.28  |      |
| 6 | -15 | 2   | 0.54 | 0.28  |      |
| - | 6   | 15  | -3   | 1.57  | 0.26 |
| - | 6   | -15 | -3   | 1.69  | 0.29 |
| 6 | -15 | 3   | 2.05 | 0.34  |      |
| - | 6   | 15  | -4   | 0.85  | 0.25 |
| - | 6   | -15 | -4   | 0.77  | 0.26 |
| 6 | -15 | 4   | 0.68 | 0.34  |      |
| 6 | -15 | 5   | 0.74 | 0.35  |      |
| - | 6   | -15 | -5   | 0.65  | 0.29 |
| 6 | -15 | 6   | 0.08 | 0.37  |      |
| - | 6   | -15 | -6   | 0.19  | 0.30 |
| 6 | -15 | 7   | 0.29 | 0.40  |      |
| - | 6   | -15 | -7   | 0.02  | 0.32 |
| - | 6   | -15 | -8   | 0.24  | 0.34 |
| 6 | -15 | 8   | 0.62 | 0.45  |      |
| 6 | 16  | -10 | 0.26 | 0.41  |      |
| 6 | -16 | -10 | 0.07 | 0.35  |      |
| 6 | 16  | -9  | 0.32 | 0.42  |      |
| 6 | -16 | -9  | 0.48 | 0.35  |      |
| 6 | 16  | -8  | 0.69 | 0.41  |      |
| 6 | -16 | -8  | 0.74 | 0.33  |      |
| 6 | 16  | -7  | 1.53 | 0.37  |      |
| 6 | -16 | -7  | 1.76 | 0.33  |      |
| 6 | 16  | -6  | 4.74 | 0.55  |      |
| 6 | -16 | -6  | 4.45 | 0.46  |      |
| 6 | 16  | -5  | 0.67 | 0.35  |      |
| 6 | -16 | -5  | 0.60 | 0.27  |      |
| 6 | 16  | -4  | 5.75 | 0.54  |      |
| 6 | -16 | -4  | 6.15 | 0.46  |      |
| 6 | 16  | -3  | 1.11 | 0.32  |      |
| 6 | -16 | -3  | 0.70 | 0.26  |      |
| - | 6   | -16 | 3    | 1.27  | 0.23 |
| 6 | 16  | -2  | 1.19 | 0.31  |      |
| - | 6   | -16 | 2    | 1.22  | 0.23 |
| 6 | -16 | -2  | 0.88 | 0.28  |      |
| 6 | 16  | -1  | 0.45 | 0.30  |      |
| 6 | -16 | -1  | 0.47 | 0.28  |      |

|   |   |     |     |       |      |
|---|---|-----|-----|-------|------|
| - | 6 | -16 | 1   | 0.57  | 0.24 |
|   | 6 | 16  | 0   | 3.36  | 0.44 |
|   | 6 | -16 | 0   | 3.48  | 0.37 |
| - | 6 | -16 | 0   | 3.75  | 0.38 |
| - | 6 | 16  | -1  | 1.21  | 0.27 |
|   | 6 | -16 | 1   | 0.56  | 0.27 |
| - | 6 | -16 | -1  | 1.01  | 0.26 |
| - | 6 | 16  | -2  | 0.47  | 0.26 |
|   | 6 | -16 | 2   | 0.33  | 0.27 |
| - | 6 | -16 | -2  | 0.67  | 0.27 |
| - | 6 | 16  | -3  | -0.21 | 0.25 |
| - | 6 | -16 | -3  | 0.02  | 0.27 |
|   | 6 | -16 | 3   | 0.08  | 0.31 |
| - | 6 | 16  | -4  | 0.52  | 0.27 |
| - | 6 | -16 | -4  | 0.76  | 0.29 |
|   | 6 | -16 | 4   | 0.47  | 0.34 |
| - | 6 | -16 | -5  | 0.21  | 0.30 |
|   | 6 | -16 | 5   | 0.74  | 0.37 |
|   | 6 | -16 | 6   | 1.16  | 0.40 |
| - | 6 | -16 | -6  | 0.92  | 0.30 |
| - | 6 | -16 | -7  | 0.23  | 0.33 |
|   | 6 | -16 | 7   | 0.13  | 0.43 |
|   | 6 | -17 | -10 | 0.20  | 0.31 |
|   | 6 | -17 | -10 | 0.31  | 0.33 |
|   | 6 | 17  | -9  | 0.36  | 0.43 |
|   | 6 | -17 | -9  | -0.11 | 0.35 |
|   | 6 | 17  | -8  | 0.73  | 0.43 |
|   | 6 | -17 | -8  | 0.51  | 0.34 |
|   | 6 | 17  | -7  | 4.31  | 0.59 |
|   | 6 | -17 | -7  | 4.97  | 0.51 |
|   | 6 | 17  | -6  | 0.66  | 0.37 |
|   | 6 | -17 | -6  | 0.47  | 0.31 |
|   | 6 | 17  | -5  | 0.99  | 0.36 |
|   | 6 | -17 | -5  | 0.80  | 0.28 |
|   | 6 | 17  | -4  | 0.55  | 0.34 |
|   | 6 | -17 | -4  | -0.01 | 0.29 |
|   | 6 | 17  | -3  | 0.33  | 0.33 |
|   | 6 | -17 | -3  | 0.10  | 0.29 |
|   | 6 | 17  | -2  | 0.11  | 0.31 |
| - | 6 | -17 | 2   | 0.11  | 0.25 |
|   | 6 | -17 | -2  | 0.13  | 0.29 |
|   | 6 | 17  | -1  | 5.15  | 0.50 |
|   | 6 | -17 | -1  | 5.23  | 0.42 |
| - | 6 | -17 | 1   | 5.81  | 0.42 |
| - | 6 | -17 | 0   | 7.33  | 0.47 |
|   | 6 | -17 | 0   | 7.12  | 0.50 |
|   | 6 | -17 | 1   | 0.42  | 0.31 |
| - | 6 | -17 | -1  | -0.03 | 0.24 |
|   | 6 | -17 | 2   | 0.03  | 0.31 |
| - | 6 | -17 | -2  | 0.27  | 0.28 |
| - | 6 | -17 | -3  | 0.33  | 0.29 |
|   | 6 | -17 | 3   | -0.11 | 0.32 |
| - | 6 | -17 | -4  | 1.25  | 0.29 |
|   | 6 | -17 | 5   | 0.76  | 0.39 |

|   |   |     |    |       |      |
|---|---|-----|----|-------|------|
| - | 6 | -17 | -5 | 0.26  | 0.29 |
| - | 6 | -17 | -6 | 0.86  | 0.34 |
|   | 6 | -17 | 6  | 0.88  | 0.42 |
|   | 6 | -17 | 7  | 2.61  | 0.48 |
|   | 6 | -18 | -9 | 0.38  | 0.37 |
|   | 6 | 18  | -8 | 2.21  | 0.47 |
|   | 6 | -18 | -8 | 2.51  | 0.37 |
|   | 6 | 18  | -7 | 1.22  | 0.42 |
|   | 6 | -18 | -7 | 1.31  | 0.35 |
|   | 6 | 18  | -6 | 0.33  | 0.38 |
|   | 6 | -18 | -6 | 0.32  | 0.32 |
|   | 6 | 18  | -5 | 0.33  | 0.36 |
|   | 6 | -18 | -5 | 0.42  | 0.32 |
|   | 6 | 18  | -4 | 2.09  | 0.39 |
|   | 6 | -18 | -4 | 2.41  | 0.33 |
|   | 6 | 18  | -3 | 0.15  | 0.33 |
|   | 6 | -18 | -3 | 0.31  | 0.31 |
|   | 6 | 18  | -2 | 0.54  | 0.35 |
| - | 6 | -18 | 2  | 0.66  | 0.27 |
|   | 6 | -18 | -2 | 0.63  | 0.31 |
|   | 6 | -18 | -1 | 0.07  | 0.31 |
| - | 6 | -18 | 1  | 0.09  | 0.26 |
|   | 6 | -18 | 0  | 1.51  | 0.33 |
| - | 6 | -18 | 0  | 1.67  | 0.29 |
|   | 6 | -18 | 1  | 1.04  | 0.33 |
| - | 6 | -18 | -1 | 1.10  | 0.27 |
|   | 6 | -18 | 2  | -0.08 | 0.30 |
| - | 6 | -18 | -2 | 0.29  | 0.30 |
|   | 6 | -18 | 3  | 0.90  | 0.33 |
| - | 6 | -18 | -3 | 1.15  | 0.32 |
| - | 6 | -18 | -4 | 1.40  | 0.34 |
| - | 6 | -18 | -5 | 0.55  | 0.34 |
|   | 6 | -18 | 6  | 0.74  | 0.44 |
|   | 6 | -19 | -8 | 0.17  | 0.36 |
|   | 6 | 19  | -7 | 0.86  | 0.44 |
|   | 6 | -19 | -7 | 1.32  | 0.37 |
|   | 6 | 19  | -6 | 0.27  | 0.40 |
|   | 6 | -19 | -6 | 0.19  | 0.34 |
|   | 6 | 19  | -5 | 0.32  | 0.38 |
|   | 6 | -19 | -5 | 0.79  | 0.34 |
|   | 6 | 19  | -4 | 2.62  | 0.43 |
|   | 6 | -19 | -4 | 2.80  | 0.36 |
|   | 6 | 19  | -3 | 1.27  | 0.37 |
|   | 6 | -19 | -3 | 1.50  | 0.34 |
|   | 6 | -19 | -2 | 0.36  | 0.33 |
| - | 6 | -19 | 2  | 0.34  | 0.27 |
|   | 6 | -19 | -1 | 0.88  | 0.33 |
| - | 6 | -19 | 1  | 1.17  | 0.30 |
|   | 6 | -19 | 0  | 0.04  | 0.32 |
| - | 6 | -19 | 0  | 0.14  | 0.29 |
| - | 6 | -19 | -1 | 0.72  | 0.31 |
|   | 6 | -19 | 1  | 1.06  | 0.35 |
| - | 6 | -19 | -2 | 1.57  | 0.33 |
|   | 6 | -19 | 2  | 1.29  | 0.37 |

|   |     |     |       |       |
|---|-----|-----|-------|-------|
| 6 | -19 | 3   | -0.23 | 0.36  |
| - | 6   | -19 | -3    | 0.27  |
| - | 6   | -19 | -4    | 1.40  |
| 6 | -19 | 4   | 0.87  | 0.39  |
| 6 | 20  | -6  | 1.41  | 0.47  |
| 6 | -20 | -6  | 1.85  | 0.37  |
| 6 | 20  | -5  | 0.50  | 0.40  |
| 6 | -20 | -5  | 0.80  | 0.36  |
| 6 | 20  | -4  | 2.37  | 0.44  |
| 6 | -20 | -4  | 3.05  | 0.35  |
| 6 | -20 | -3  | 0.73  | 0.34  |
| 6 | -20 | -2  | 0.90  | 0.35  |
| - | 6   | -20 | 1     | 0.07  |
| 6 | -20 | -1  | 0.12  | 0.34  |
| - | 6   | -20 | 0     | 0.81  |
| 6 | -20 | 0   | 0.24  | 0.32  |
| - | 6   | -20 | -1    | 0.47  |
| 6 | -20 | 1   | -0.04 | 0.35  |
| - | 6   | -20 | -2    | 0.48  |
| 6 | -20 | 2   | 0.30  | 0.36  |
| - | 6   | -20 | -3    | 1.19  |
| 6 | -20 | 3   | 0.99  | 0.39  |
| 6 | -21 | -5  | 0.58  | 0.37  |
| 6 | -21 | -4  | 0.95  | 0.37  |
| 6 | -21 | -3  | 0.48  | 0.35  |
| 6 | -21 | -2  | 0.48  | 0.35  |
| - | 6   | -21 | 1     | 1.05  |
| 6 | -21 | -1  | 1.08  | 0.36  |
| 6 | -21 | 0   | 0.48  | 0.37  |
| - | 6   | -21 | 0     | 0.36  |
| - | 6   | -21 | -1    | 0.37  |
| 6 | -21 | 1   | 0.25  | 0.38  |
| 7 | 0   | -14 | 5.62  | 0.57  |
| 7 | 0   | -13 | -0.79 | 0.30  |
| 7 | 0   | -12 | -0.20 | 0.30  |
| 7 | 0   | -11 | -0.62 | 0.28  |
| 7 | 0   | -11 | -0.18 | 0.23  |
| 7 | 0   | -10 | 12.00 | 0.62  |
| 7 | 0   | -10 | 11.28 | 0.54  |
| 7 | 0   | -9  | -0.50 | 0.22  |
| 7 | 0   | -9  | -0.10 | 0.19  |
| 7 | 0   | -8  | 0.35  | 0.21  |
| 7 | 0   | -8  | 0.61  | 0.20  |
| - | 7   | 0   | 7     | -0.14 |
| 7 | 0   | -7  | 0.22  | 0.18  |
| 7 | 0   | -7  | -0.45 | 0.18  |
| 7 | 0   | -6  | 23.34 | 0.86  |
| 7 | 0   | -6  | 22.73 | 1.02  |
| - | 7   | 0   | 6     | 23.22 |
| 7 | 0   | -5  | 0.11  | 0.15  |
| 7 | 0   | -5  | -0.13 | 0.14  |
| - | 7   | 0   | 5     | 0.02  |
| 7 | 0   | -4  | 10.33 | 0.43  |
| 7 | 0   | -4  | 10.11 | 0.51  |

|   |   |    |     |       |      |
|---|---|----|-----|-------|------|
| - | 7 | 0  | 4   | 9.88  | 0.42 |
| - | 7 | 0  | 3   | -0.03 | 0.12 |
|   | 7 | 0  | -3  | -0.11 | 0.12 |
|   | 7 | 0  | -3  | 0.25  | 0.16 |
|   | 7 | 0  | -2  | 60.38 | 2.58 |
| - | 7 | 0  | 2   | 61.96 | 2.19 |
|   | 7 | 0  | -2  | 60.12 | 2.09 |
|   | 7 | 0  | -1  | -0.31 | 0.18 |
| - | 7 | 0  | 1   | -0.04 | 0.13 |
|   | 7 | 0  | -1  | -0.25 | 0.09 |
|   | 7 | 0  | 0   | 83.43 | 3.27 |
|   | 7 | 0  | 0   | 66.99 | 2.64 |
| - | 7 | 0  | 0   | 82.09 | 2.79 |
|   | 7 | 0  | 1   | -0.04 | 0.18 |
| - | 7 | 0  | -1  | 0.02  | 0.09 |
| - | 7 | 0  | -2  | 3.30  | 0.26 |
|   | 7 | 0  | 3   | 0.03  | 0.20 |
| - | 7 | 0  | -3  | -0.15 | 0.18 |
| - | 7 | 0  | -3  | -0.03 | 0.12 |
| - | 7 | 0  | -4  | 15.20 | 0.63 |
|   | 7 | 0  | 4   | 14.90 | 0.74 |
| - | 7 | 0  | -4  | 15.23 | 0.58 |
|   | 7 | 0  | 5   | 0.33  | 0.26 |
| - | 7 | 0  | -5  | 0.22  | 0.15 |
| - | 7 | 0  | -5  | -0.06 | 0.21 |
| - | 7 | 0  | -6  | 6.69  | 0.36 |
|   | 7 | 0  | 6   | 7.10  | 0.53 |
| - | 7 | 0  | -6  | 7.11  | 0.46 |
|   | 7 | 0  | 7   | -0.07 | 0.31 |
| - | 7 | 0  | -7  | -0.04 | 0.24 |
| - | 7 | 0  | -7  | -0.06 | 0.19 |
|   | 7 | 0  | 8   | 0.66  | 0.34 |
| - | 7 | 0  | -8  | -0.12 | 0.27 |
| - | 7 | 0  | -8  | 0.27  | 0.23 |
| - | 7 | 0  | -9  | -0.20 | 0.30 |
|   | 7 | 0  | 9   | 0.08  | 0.36 |
| - | 7 | 0  | -9  | -0.17 | 0.24 |
|   | 7 | 0  | 10  | 9.57  | 0.69 |
| - | 7 | 0  | -10 | 8.59  | 0.51 |
|   | 7 | 0  | 11  | 0.74  | 0.43 |
|   | 7 | 0  | 12  | 1.30  | 0.46 |
|   | 7 | 1  | -15 | -0.19 | 0.41 |
|   | 7 | 1  | -14 | -0.09 | 0.37 |
|   | 7 | -1 | -14 | -0.52 | 0.36 |
|   | 7 | 1  | -13 | 4.87  | 0.46 |
|   | 7 | -1 | -13 | 4.58  | 0.50 |
|   | 7 | 1  | -12 | 3.91  | 0.37 |
|   | 7 | -1 | -12 | 4.04  | 0.38 |
|   | 7 | 1  | -11 | 2.06  | 0.27 |
|   | 7 | 1  | -11 | 1.94  | 0.30 |
|   | 7 | -1 | -11 | 1.84  | 0.28 |
|   | 7 | 1  | -10 | 0.07  | 0.23 |
|   | 7 | 1  | -10 | 0.07  | 0.25 |
|   | 7 | -1 | -10 | 0.12  | 0.19 |

|   |    |     |       |       |      |
|---|----|-----|-------|-------|------|
| 7 | -1 | -10 | -0.17 | 0.23  |      |
| 7 | 1  | -9  | -0.01 | 0.22  |      |
| 7 | 1  | -9  | 0.21  | 0.21  |      |
| 7 | -1 | -9  | -0.13 | 0.24  |      |
| 7 | -1 | -9  | 0.07  | 0.18  |      |
| 7 | 1  | -8  | 4.96  | 0.37  |      |
| 7 | 1  | -8  | 5.80  | 0.39  |      |
| 7 | -1 | -8  | 5.38  | 0.38  |      |
| 7 | -1 | -8  | 5.02  | 0.39  |      |
| 7 | 1  | -7  | 38.79 | 1.72  |      |
| 7 | 1  | -7  | 38.92 | 1.42  |      |
| - | 7  | 1   | 7     | 40.45 | 1.45 |
| 7 | -1 | -7  | 41.89 | 1.43  |      |
| - | 7  | -1  | 7     | 40.92 | 1.45 |
| 7 | -1 | -7  | 39.72 | 1.72  |      |
| 7 | 1  | -6  | 13.32 | 0.56  |      |
| 7 | 1  | -6  | 13.87 | 0.66  |      |
| - | 7  | 1   | 6     | 14.17 | 0.55 |
| 7 | -1 | -6  | 13.87 | 0.66  |      |
| 7 | -1 | -6  | 14.06 | 0.58  |      |
| - | 7  | -1  | 6     | 14.07 | 0.54 |
| 7 | 1  | -5  | 1.54  | 0.19  |      |
| 7 | 1  | -5  | 1.35  | 0.16  |      |
| - | 7  | 1   | 5     | 1.92  | 0.21 |
| - | 7  | -1  | 5     | 2.05  | 0.20 |
| 7 | -1 | -5  | 1.88  | 0.24  |      |
| 7 | -1 | -5  | 1.40  | 0.18  |      |
| 7 | 1  | -4  | 1.06  | 0.18  |      |
| 7 | 1  | -4  | 0.47  | 0.14  |      |
| - | 7  | 1   | 4     | 0.77  | 0.12 |
| 7 | -1 | -4  | 0.73  | 0.15  |      |
| 7 | -1 | -4  | 0.77  | 0.16  |      |
| - | 7  | -1  | 4     | 0.57  | 0.12 |
| 7 | 1  | -3  | 14.43 | 0.68  |      |
| - | 7  | 1   | 3     | 14.28 | 0.56 |
| 7 | 1  | -3  | 13.77 | 0.53  |      |
| 7 | -1 | -3  | 14.28 | 0.55  |      |
| - | 7  | -1  | 3     | 14.13 | 0.56 |
| 7 | -1 | -3  | 14.62 | 0.67  |      |
| 7 | 1  | -2  | 10.76 | 0.53  |      |
| - | 7  | 1   | 2     | 10.66 | 0.44 |
| 7 | -1 | -2  | 10.35 | 0.54  |      |
| 7 | -1 | -2  | 10.12 | 0.44  |      |
| - | 7  | -1  | 2     | 10.93 | 0.45 |
| 7 | 1  | -1  | 11.25 | 0.62  |      |
| - | 7  | 1   | 1     | 12.30 | 0.52 |
| - | 7  | -1  | 1     | 13.08 | 0.51 |
| 7 | -1 | -1  | 12.12 | 0.47  |      |
| 7 | -1 | -1  | 12.49 | 0.59  |      |
| 7 | 1  | 0   | 63.82 | 2.66  |      |
| - | 7  | 1   | 0     | 59.72 | 2.26 |
| 7 | -1 | 0   | 63.18 | 2.66  |      |
| - | 7  | -1  | 0     | 63.08 | 2.26 |
| 7 | -1 | 0   | 63.35 | 2.14  |      |

|   |   |    |     |       |      |
|---|---|----|-----|-------|------|
| - | 7 | 1  | -1  | 17.28 | 0.76 |
|   | 7 | -1 | 1   | 22.00 | 0.90 |
| - | 7 | 1  | -2  | 2.30  | 0.24 |
| - | 7 | -1 | -2  | 1.49  | 0.17 |
|   | 7 | 1  | 3   | 8.97  | 0.53 |
| - | 7 | 1  | -3  | 9.94  | 0.45 |
| - | 7 | -1 | -3  | 9.66  | 0.39 |
| - | 7 | -1 | -3  | 9.72  | 0.47 |
|   | 7 | 1  | 4   | 9.26  | 0.56 |
| - | 7 | 1  | -4  | 9.90  | 0.43 |
| - | 7 | 1  | -4  | 11.03 | 0.50 |
| - | 7 | -1 | -4  | 9.86  | 0.41 |
| - | 7 | -1 | -4  | 10.28 | 0.50 |
|   | 7 | -1 | 4   | 9.62  | 0.55 |
| - | 7 | 1  | -5  | 57.46 | 2.03 |
| - | 7 | 1  | -5  | 60.81 | 2.16 |
|   | 7 | 1  | 5   | 59.03 | 2.53 |
|   | 7 | -1 | 5   | 59.81 | 2.53 |
| - | 7 | -1 | -5  | 57.22 | 2.03 |
| - | 7 | -1 | -5  | 59.18 | 2.15 |
| - | 7 | 1  | -6  | 0.13  | 0.17 |
| - | 7 | 1  | -6  | -0.02 | 0.20 |
|   | 7 | 1  | 6   | -0.05 | 0.29 |
| - | 7 | -1 | -6  | 0.04  | 0.16 |
| - | 7 | -1 | -6  | -0.05 | 0.22 |
|   | 7 | -1 | 6   | 0.11  | 0.29 |
|   | 7 | 1  | 7   | 3.37  | 0.41 |
| - | 7 | 1  | -7  | 3.45  | 0.41 |
| - | 7 | 1  | -7  | 3.08  | 0.30 |
|   | 7 | -1 | 7   | 3.31  | 0.41 |
| - | 7 | -1 | -7  | 2.94  | 0.29 |
| - | 7 | -1 | -7  | 3.08  | 0.29 |
| - | 7 | 1  | -8  | 0.25  | 0.22 |
|   | 7 | 1  | 8   | 0.43  | 0.33 |
| - | 7 | 1  | -8  | -0.06 | 0.27 |
| - | 7 | -1 | -8  | 0.15  | 0.27 |
| - | 7 | -1 | -8  | 0.29  | 0.22 |
|   | 7 | -1 | 8   | 0.36  | 0.34 |
| - | 7 | 1  | -9  | 0.68  | 0.26 |
|   | 7 | 1  | 9   | 0.71  | 0.36 |
| - | 7 | -1 | -9  | 0.59  | 0.31 |
|   | 7 | -1 | 9   | 1.14  | 0.37 |
| - | 7 | 1  | -10 | 1.12  | 0.29 |
|   | 7 | 1  | 10  | 1.69  | 0.41 |
|   | 7 | -1 | 10  | 1.89  | 0.41 |
| - | 7 | 1  | -11 | 2.67  | 0.35 |
|   | 7 | 1  | 11  | 4.41  | 0.60 |
|   | 7 | -1 | 11  | 4.41  | 0.61 |
|   | 7 | 1  | 12  | 1.50  | 0.48 |
|   | 7 | 2  | -14 | 2.03  | 0.40 |
|   | 7 | -2 | -14 | 2.36  | 0.40 |
|   | 7 | 2  | -13 | -0.10 | 0.32 |
|   | 7 | -2 | -13 | -0.02 | 0.34 |
|   | 7 | 2  | -12 | 0.07  | 0.28 |

|   |    |     |       |            |
|---|----|-----|-------|------------|
| 7 | 2  | -12 | -0.46 | 0.29       |
| 7 | -2 | -12 | -0.83 | 0.31       |
| 7 | 2  | -11 | 2.41  | 0.29       |
| 7 | 2  | -11 | 1.92  | 0.30       |
| 7 | -2 | -11 | 1.57  | 0.31       |
| 7 | 2  | -10 | 8.75  | 0.49       |
| 7 | 2  | -10 | 9.24  | 0.54       |
| 7 | -2 | -10 | 9.04  | 0.53       |
| 7 | 2  | -9  | -0.02 | 0.22       |
| 7 | 2  | -9  | -0.03 | 0.21       |
| 7 | -2 | -9  | -0.64 | 0.24       |
| 7 | -2 | -9  | -0.09 | 0.18       |
| - | 7  | 2   | 8     | 0.40 0.14  |
| 7 | 2  | -8  | 0.35  | 0.23       |
| 7 | 2  | -8  | 0.48  | 0.19       |
| 7 | -2 | -8  | 0.07  | 0.20       |
| 7 | -2 | -8  | 0.18  | 0.17       |
| - | 7  | 2   | 7     | 0.09 0.12  |
| 7 | 2  | -7  | -0.01 | 0.16       |
| 7 | 2  | -7  | 0.02  | 0.19       |
| 7 | -2 | -7  | 0.00  | 0.16       |
| 7 | -2 | -7  | -0.41 | 0.20       |
| - | 7  | 2   | 6     | 67.98 2.42 |
| 7 | 2  | -6  | 65.01 | 2.86       |
| 7 | 2  | -6  | 66.92 | 2.33       |
| 7 | -2 | -6  | 72.65 | 2.34       |
| 7 | -2 | -6  | 64.96 | 2.84       |
| - | 7  | -2  | 6     | 67.76 2.42 |
| 7 | 2  | -5  | 5.75  | 0.38       |
| 7 | 2  | -5  | 5.66  | 0.29       |
| - | 7  | 2   | 5     | 5.84 0.29  |
| 7 | -2 | -5  | 5.91  | 0.35       |
| - | 7  | -2  | 5     | 6.03 0.29  |
| 7 | -2 | -5  | 5.86  | 0.35       |
| 7 | 2  | -4  | 77.04 | 3.30       |
| - | 7  | 2   | 4     | 79.22 2.81 |
| 7 | 2  | -4  | 76.29 | 2.68       |
| - | 7  | -2  | 4     | 78.97 2.81 |
| 7 | -2 | -4  | 81.75 | 2.69       |
| 7 | -2 | -4  | 76.96 | 3.29       |
| 7 | 2  | -3  | 37.20 | 1.60       |
| - | 7  | 2   | 3     | 37.38 1.35 |
| 7 | -2 | -3  | 37.03 | 1.29       |
| 7 | -2 | -3  | 36.89 | 1.59       |
| - | 7  | -2  | 3     | 36.14 1.34 |
| - | 7  | 2   | 2     | 0.12 0.12  |
| 7 | 2  | -2  | -0.12 | 0.18       |
| 7 | 2  | -2  | 0.02  | 0.10       |
| 7 | -2 | -2  | -0.11 | 0.12       |
| 7 | -2 | -2  | 0.15  | 0.16       |
| - | 7  | -2  | 2     | 0.22 0.12  |
| 7 | 2  | -1  | -0.32 | 0.19       |
| - | 7  | 2   | 1     | 0.00 0.13  |
| 7 | 2  | -1  | -0.24 | 0.09       |

|   |    |    |       |       |
|---|----|----|-------|-------|
| 7 | -2 | -1 | 0.04  | 0.18  |
| - | 7  | -2 | 1     | 0.17  |
| 7 | -2 | -1 | 0.07  | 0.11  |
| 7 | 2  | 0  | 5.28  | 0.25  |
| 7 | -2 | 0  | 4.76  | 0.37  |
| 7 | -2 | 0  | 5.76  | 0.29  |
| - | 7  | -2 | 0     | 4.75  |
| - | 7  | 2  | -1    | -0.02 |
| 7 | -2 | 1  | -0.16 | 0.21  |
| - | 7  | -2 | -1    | 0.17  |
| 7 | 2  | 2  | 4.69  | 0.38  |
| - | 7  | 2  | -2    | 4.82  |
| 7 | -2 | 2  | 3.95  | 0.34  |
| 7 | 2  | 3  | 2.55  | 0.36  |
| - | 7  | 2  | -3    | 2.95  |
| - | 7  | -2 | -3    | 2.67  |
| - | 7  | -2 | -3    | 2.52  |
| 7 | 2  | 4  | 16.37 | 0.81  |
| - | 7  | 2  | -4    | 15.06 |
| - | 7  | 2  | -4    | 17.44 |
| - | 7  | -2 | -4    | 16.31 |
| 7 | -2 | 4  | 15.10 | 0.77  |
| - | 7  | -2 | -4    | 15.87 |
| - | 7  | 2  | -5    | 2.43  |
| - | 7  | 2  | -5    | 2.93  |
| 7 | 2  | 5  | 3.01  | 0.37  |
| 7 | -2 | 5  | 2.53  | 0.32  |
| - | 7  | -2 | -5    | 2.69  |
| - | 7  | -2 | -5    | 2.40  |
| 7 | 2  | 6  | 13.00 | 0.74  |
| - | 7  | 2  | -6    | 14.96 |
| - | 7  | 2  | -6    | 12.63 |
| 7 | -2 | 6  | 13.13 | 0.73  |
| - | 7  | -2 | -6    | 13.56 |
| - | 7  | -2 | -6    | 13.63 |
| - | 7  | 2  | -7    | 0.05  |
| 7 | 2  | 7  | 0.39  | 0.32  |
| - | 7  | 2  | -7    | -0.08 |
| - | 7  | -2 | -7    | -0.11 |
| - | 7  | -2 | -7    | -0.06 |
| 7 | -2 | 7  | 0.20  | 0.32  |
| - | 7  | 2  | -8    | 4.37  |
| - | 7  | 2  | -8    | 4.90  |
| 7 | 2  | 8  | 4.90  | 0.52  |
| - | 7  | -2 | -8    | 3.89  |
| 7 | -2 | 8  | 4.63  | 0.52  |
| - | 7  | 2  | -9    | 1.67  |
| 7 | 2  | 9  | 2.49  | 0.39  |
| - | 7  | -2 | -9    | 2.16  |
| 7 | -2 | 9  | 1.77  | 0.39  |
| - | 7  | 2  | -10   | 4.38  |
| 7 | 2  | 10 | 6.05  | 0.59  |
| 7 | -2 | 10 | 4.55  | 0.58  |
| - | 7  | 2  | -11   | 0.11  |

|   |    |     |       |       |      |
|---|----|-----|-------|-------|------|
| 7 | 2  | 11  | 1.24  | 0.45  |      |
| 7 | -2 | 11  | 0.80  | 0.43  |      |
| 7 | 3  | -15 | -0.48 | 0.37  |      |
| 7 | 3  | -14 | -0.82 | 0.36  |      |
| 7 | -3 | -14 | -0.34 | 0.37  |      |
| 7 | 3  | -13 | 8.15  | 0.60  |      |
| 7 | 3  | -13 | 8.16  | 0.57  |      |
| 7 | -3 | -13 | 8.16  | 0.59  |      |
| 7 | 3  | -12 | 0.73  | 0.31  |      |
| 7 | 3  | -12 | 0.89  | 0.29  |      |
| 7 | -3 | -12 | 0.48  | 0.30  |      |
| 7 | 3  | -11 | 11.12 | 0.63  |      |
| 7 | 3  | -11 | 10.57 | 0.54  |      |
| 7 | -3 | -11 | 11.67 | 0.57  |      |
| 7 | 3  | -10 | 5.48  | 0.45  |      |
| 7 | 3  | -10 | 5.68  | 0.41  |      |
| 7 | -3 | -10 | 5.57  | 0.47  |      |
| 7 | 3  | -9  | 6.38  | 0.45  |      |
| 7 | 3  | -9  | 6.28  | 0.39  |      |
| 7 | -3 | -9  | 5.71  | 0.45  |      |
| - | 7  | 3   | 8     | 44.43 | 1.59 |
| 7 | 3  | -8  | 42.79 | 1.54  |      |
| 7 | 3  | -8  | 43.82 | 1.89  |      |
| 7 | -3 | -8  | 41.41 | 1.86  |      |
| 7 | -3 | -8  | 45.99 | 1.56  |      |
| 7 | 3  | -7  | 1.55  | 0.18  |      |
| - | 7  | 3   | 7     | 1.33  | 0.15 |
| 7 | 3  | -7  | 1.33  | 0.23  |      |
| 7 | -3 | -7  | 1.56  | 0.21  |      |
| 7 | -3 | -7  | 1.61  | 0.18  |      |
| 7 | 3  | -6  | 5.15  | 0.31  |      |
| - | 7  | 3   | 6     | 4.74  | 0.28 |
| 7 | 3  | -6  | 5.17  | 0.38  |      |
| - | 7  | -3  | 6     | 5.48  | 0.26 |
| 7 | -3 | -6  | 5.44  | 0.36  |      |
| 7 | -3 | -6  | 4.91  | 0.32  |      |
| - | 7  | 3   | 5     | 4.58  | 0.28 |
| 7 | 3  | -5  | 5.08  | 0.27  |      |
| 7 | 3  | -5  | 4.77  | 0.36  |      |
| 7 | -3 | -5  | 4.70  | 0.31  |      |
| - | 7  | -3  | 5     | 4.23  | 0.26 |
| 7 | -3 | -5  | 4.49  | 0.30  |      |
| - | 7  | 3   | 4     | 29.80 | 1.11 |
| 7 | 3  | -4  | 30.68 | 1.33  |      |
| 7 | 3  | -4  | 29.78 | 1.06  |      |
| 7 | -3 | -4  | 32.23 | 1.09  |      |
| 7 | -3 | -4  | 29.17 | 1.30  |      |
| - | 7  | -3  | 4     | 30.09 | 1.11 |
| - | 7  | 3   | 3     | 7.08  | 0.33 |
| 7 | 3  | -3  | 5.56  | 0.27  |      |
| 7 | 3  | -3  | 7.34  | 0.39  |      |
| 7 | -3 | -3  | 6.76  | 0.37  |      |
| 7 | -3 | -3  | 6.41  | 0.32  |      |
| - | 7  | -3  | 3     | 6.76  | 0.31 |

|   |    |    |       |       |
|---|----|----|-------|-------|
| 7 | 3  | -2 | 2.69  | 0.17  |
| 7 | 3  | -2 | 2.87  | 0.29  |
| - | 7  | 3  | 2     | 2.91  |
| - | 7  | -3 | 2     | 2.49  |
| 7 | -3 | -2 | 2.42  | 0.24  |
| 7 | -3 | -2 | 2.61  | 0.27  |
| 7 | 3  | -1 | -0.05 | 0.08  |
| - | 7  | 3  | 1     | -0.08 |
| 7 | 3  | -1 | 0.20  | 0.07  |
| - | 7  | -3 | 1     | 0.10  |
| 7 | -3 | -1 | -0.15 | 0.17  |
| 7 | -3 | -1 | 0.17  | 0.12  |
| - | 7  | 3  | 0     | 0.06  |
| 7 | 3  | 0  | -0.17 | 0.08  |
| 7 | 3  | 0  | 0.00  | 0.19  |
| - | 7  | -3 | 0     | -0.02 |
| 7 | -3 | 0  | 0.24  | 0.12  |
| 7 | -3 | 0  | -0.06 | 0.20  |
| - | 7  | 3  | -1    | 21.79 |
| 7 | 3  | 1  | 24.49 | 1.06  |
| 7 | 3  | 1  | 24.12 | 0.81  |
| 7 | -3 | 1  | 21.79 | 1.03  |
| - | 7  | 3  | -2    | 1.78  |
| 7 | 3  | 2  | 2.25  | 0.26  |
| 7 | -3 | 2  | 1.73  | 0.25  |
| 7 | 3  | 3  | 4.50  | 0.40  |
| - | 7  | 3  | -3    | 5.11  |
| - | 7  | -3 | -3    | 4.74  |
| - | 7  | -3 | -3    | 4.93  |
| 7 | -3 | 3  | 4.52  | 0.40  |
| 7 | 3  | 4  | 0.55  | 0.25  |
| - | 7  | 3  | -4    | 0.06  |
| - | 7  | 3  | -4    | 0.34  |
| - | 7  | -3 | -4    | 0.10  |
| 7 | -3 | 4  | 0.21  | 0.23  |
| - | 7  | -3 | -4    | 0.27  |
| - | 7  | 3  | -5    | 0.32  |
| - | 7  | 3  | -5    | 0.01  |
| 7 | 3  | 5  | 0.30  | 0.27  |
| - | 7  | -3 | -5    | 0.11  |
| - | 7  | -3 | -5    | 0.01  |
| 7 | -3 | 5  | 0.29  | 0.25  |
| 7 | 3  | 6  | 1.83  | 0.29  |
| - | 7  | 3  | -6    | 1.67  |
| - | 7  | 3  | -6    | 1.59  |
| - | 7  | -3 | -6    | 1.77  |
| 7 | -3 | 6  | 1.85  | 0.32  |
| - | 7  | 3  | -7    | 7.98  |
| 7 | 3  | 7  | 7.81  | 0.57  |
| - | 7  | 3  | -7    | 7.14  |
| 7 | -3 | 7  | 7.94  | 0.57  |
| - | 7  | -3 | -7    | 7.55  |
| - | 7  | 3  | -8    | 1.46  |
| 7 | 3  | 8  | 1.90  | 0.35  |

|   |   |    |     |       |      |
|---|---|----|-----|-------|------|
| - | 7 | 3  | -8  | 1.43  | 0.31 |
|   | 7 | -3 | 8   | 1.38  | 0.36 |
| - | 7 | -3 | -8  | 1.64  | 0.30 |
| - | 7 | 3  | -9  | 1.21  | 0.27 |
|   | 7 | 3  | 9   | 1.33  | 0.37 |
|   | 7 | -3 | 9   | 0.71  | 0.37 |
| - | 7 | -3 | -9  | 0.73  | 0.31 |
|   | 7 | 3  | 10  | 1.24  | 0.41 |
| - | 7 | 3  | -10 | 0.43  | 0.29 |
|   | 7 | -3 | 10  | 0.31  | 0.40 |
| - | 7 | 3  | -11 | 1.18  | 0.33 |
|   | 7 | 3  | 11  | 2.43  | 0.46 |
|   | 7 | -3 | 11  | 1.81  | 0.45 |
| - | 7 | 3  | -12 | -0.06 | 0.34 |
|   | 7 | 4  | -14 | 3.90  | 0.44 |
|   | 7 | -4 | -14 | 3.93  | 0.44 |
|   | 7 | 4  | -13 | 0.82  | 0.32 |
|   | 7 | 4  | -13 | 0.57  | 0.34 |
|   | 7 | -4 | -13 | 0.26  | 0.35 |
|   | 7 | 4  | -12 | 0.57  | 0.30 |
|   | 7 | 4  | -12 | 0.36  | 0.30 |
|   | 7 | -4 | -12 | 0.09  | 0.29 |
|   | 7 | 4  | -11 | 5.43  | 0.43 |
|   | 7 | 4  | -11 | 5.25  | 0.47 |
|   | 7 | -4 | -11 | 5.15  | 0.49 |
|   | 7 | 4  | -10 | 9.43  | 0.48 |
|   | 7 | 4  | -10 | 9.94  | 0.59 |
|   | 7 | -4 | -10 | 10.62 | 0.56 |
|   | 7 | 4  | -9  | 6.61  | 0.40 |
|   | 7 | 4  | -9  | 6.84  | 0.48 |
|   | 7 | -4 | -9  | 6.84  | 0.46 |
|   | 7 | 4  | -8  | 1.33  | 0.26 |
|   | 7 | 4  | -8  | 1.23  | 0.19 |
|   | 7 | -4 | -8  | 1.11  | 0.23 |
|   | 7 | 4  | -7  | 0.04  | 0.21 |
| - | 7 | 4  | 7   | -0.09 | 0.14 |
|   | 7 | 4  | -7  | 0.26  | 0.16 |
|   | 7 | -4 | -7  | 0.10  | 0.14 |
|   | 7 | -4 | -7  | -0.01 | 0.21 |
|   | 7 | 4  | -6  | 3.52  | 0.31 |
|   | 7 | 4  | -6  | 3.67  | 0.24 |
| - | 7 | 4  | 6   | 3.11  | 0.25 |
|   | 7 | -4 | -6  | 3.49  | 0.30 |
| - | 7 | -4 | 6   | 3.50  | 0.22 |
|   | 7 | -4 | -6  | 3.40  | 0.27 |
|   | 7 | 4  | -5  | 3.97  | 0.23 |
| - | 7 | 4  | 5   | 3.78  | 0.25 |
|   | 7 | 4  | -5  | 3.51  | 0.31 |
|   | 7 | -4 | -5  | 3.40  | 0.26 |
|   | 7 | -4 | -5  | 3.09  | 0.32 |
| - | 7 | -4 | 5   | 3.23  | 0.22 |
| - | 7 | 4  | 4   | 13.24 | 0.54 |
|   | 7 | 4  | -4  | 13.76 | 0.67 |
| - | 7 | -4 | 4   | 13.22 | 0.53 |

|   |    |    |       |       |
|---|----|----|-------|-------|
| 7 | -4 | -4 | 13.59 | 0.62  |
| 7 | -4 | -4 | 13.31 | 0.54  |
| - | 7  | 4  | 3     | 1.06  |
| 7 | 4  | -3 | 1.27  | 0.21  |
| 7 | -4 | -3 | 0.94  | 0.17  |
| - | 7  | -4 | 3     | 0.92  |
| 7 | -4 | -3 | 0.75  | 0.16  |
| 7 | 4  | -2 | 16.45 | 0.56  |
| - | 7  | 4  | 2     | 15.92 |
| - | 7  | -4 | 2     | 16.45 |
| 7 | -4 | -2 | 15.57 | 0.74  |
| 7 | -4 | -2 | 15.78 | 0.61  |
| - | 7  | 4  | 1     | 6.23  |
| 7 | 4  | -1 | 5.53  | 0.41  |
| 7 | 4  | -1 | 7.14  | 0.24  |
| 7 | -4 | -1 | 6.06  | 0.38  |
| 7 | -4 | -1 | 6.21  | 0.30  |
| - | 7  | -4 | 1     | 6.10  |
| 7 | 4  | 0  | 43.19 | 1.87  |
| 7 | -4 | 0  | 44.06 | 1.51  |
| 7 | -4 | 0  | 42.85 | 1.86  |
| - | 7  | -4 | 0     | 43.03 |
| 7 | 4  | 1  | 11.92 | 0.61  |
| - | 7  | 4  | -1    | 11.82 |
| 7 | -4 | 1  | 11.49 | 0.60  |
| 7 | 4  | 2  | 1.76  | 0.25  |
| - | 7  | 4  | -2    | 1.47  |
| 7 | -4 | 2  | 1.81  | 0.25  |
| 7 | 4  | 3  | 12.56 | 0.64  |
| - | 7  | 4  | -3    | 12.20 |
| 7 | -4 | 3  | 12.11 | 0.63  |
| - | 7  | -4 | -3    | 13.70 |
| - | 7  | 4  | -4    | 2.60  |
| - | 7  | 4  | -4    | 2.57  |
| 7 | 4  | 4  | 2.95  | 0.38  |
| - | 7  | -4 | -4    | 2.92  |
| 7 | -4 | 4  | 2.48  | 0.30  |
| 7 | 4  | 5  | 9.68  | 0.56  |
| - | 7  | 4  | -5    | 9.08  |
| - | 7  | 4  | -5    | 9.05  |
| - | 7  | -4 | -5    | 8.92  |
| 7 | -4 | 5  | 8.68  | 0.53  |
| 7 | 4  | 6  | 1.26  | 0.29  |
| - | 7  | 4  | -6    | 0.65  |
| - | 7  | 4  | -6    | 0.98  |
| 7 | -4 | 6  | 1.30  | 0.31  |
| - | 7  | -4 | -6    | 1.16  |
| - | 7  | 4  | -7    | 0.06  |
| 7 | 4  | 7  | 0.24  | 0.30  |
| - | 7  | 4  | -7    | 0.32  |
| - | 7  | -4 | -7    | 0.33  |
| 7 | -4 | 7  | 0.47  | 0.29  |
| - | 7  | 4  | -8    | 3.88  |
| - | 7  | 4  | -8    | 3.74  |

|   |    |     |       |       |      |
|---|----|-----|-------|-------|------|
| 7 | 4  | 8   | 4.76  | 0.51  |      |
| 7 | -4 | 8   | 4.08  | 0.45  |      |
| - | 7  | -4  | -8    | 3.95  | 0.45 |
| 7 | 4  | 9   | 0.62  | 0.36  |      |
| - | 7  | 4   | -9    | 0.08  | 0.27 |
| - | 7  | -4  | -9    | 0.56  | 0.31 |
| 7 | -4 | 9   | 0.36  | 0.34  |      |
| 7 | 4  | 10  | 1.37  | 0.39  |      |
| - | 7  | 4   | -10   | 0.34  | 0.30 |
| 7 | -4 | 10  | 0.74  | 0.41  |      |
| - | 7  | 4   | -11   | 0.52  | 0.32 |
| 7 | -4 | 11  | 0.80  | 0.44  |      |
| 7 | 5  | -14 | 1.45  | 0.40  |      |
| 7 | 5  | -14 | 1.63  | 0.37  |      |
| 7 | -5 | -14 | 1.24  | 0.40  |      |
| 7 | 5  | -13 | -0.16 | 0.32  |      |
| 7 | 5  | -13 | 0.19  | 0.33  |      |
| 7 | -5 | -13 | -0.27 | 0.31  |      |
| 7 | 5  | -12 | 5.17  | 0.46  |      |
| 7 | 5  | -12 | 4.47  | 0.50  |      |
| 7 | -5 | -12 | 4.64  | 0.45  |      |
| 7 | 5  | -11 | 0.13  | 0.30  |      |
| 7 | 5  | -11 | 0.60  | 0.27  |      |
| 7 | -5 | -11 | 0.20  | 0.31  |      |
| 7 | 5  | -10 | 0.40  | 0.23  |      |
| 7 | 5  | -10 | 0.11  | 0.27  |      |
| 7 | -5 | -10 | -0.26 | 0.28  |      |
| 7 | 5  | -9  | 11.62 | 0.53  |      |
| 7 | 5  | -9  | 11.58 | 0.66  |      |
| 7 | -5 | -9  | 12.30 | 0.59  |      |
| 7 | 5  | -8  | 9.62  | 0.56  |      |
| 7 | 5  | -8  | 10.23 | 0.48  |      |
| 7 | -5 | -8  | 10.56 | 0.53  |      |
| 7 | 5  | -7  | 52.77 | 1.89  |      |
| 7 | 5  | -7  | 54.48 | 2.34  |      |
| - | 7  | 5   | 7     | 53.71 | 1.97 |
| 7 | -5 | -7  | 57.24 | 1.91  |      |
| 7 | 5  | -6  | 0.24  | 0.14  |      |
| 7 | 5  | -6  | 0.08  | 0.20  |      |
| - | 7  | 5   | 6     | 0.08  | 0.14 |
| 7 | -5 | -6  | 0.16  | 0.13  |      |
| - | 7  | -5  | 6     | -0.06 | 0.11 |
| 7 | -5 | -6  | -0.21 | 0.19  |      |
| 7 | 5  | -5  | 0.52  | 0.12  |      |
| - | 7  | 5   | 5     | 0.42  | 0.14 |
| 7 | 5  | -5  | 0.62  | 0.22  |      |
| 7 | -5 | -5  | 0.56  | 0.13  |      |
| 7 | -5 | -5  | 0.54  | 0.19  |      |
| - | 7  | -5  | 5     | 0.45  | 0.12 |
| - | 7  | 5   | 4     | 29.91 | 1.13 |
| - | 7  | -5  | 4     | 30.29 | 1.12 |
| 7 | -5 | -4  | 31.35 | 1.10  |      |
| 7 | -5 | -4  | 30.69 | 1.31  |      |
| - | 7  | 5   | 3     | 3.64  | 0.24 |

|   |    |    |       |       |      |
|---|----|----|-------|-------|------|
| 7 | 5  | -3 | 4.23  | 0.19  |      |
| - | 7  | -5 | 3     | 3.30  | 0.26 |
| 7 | -5 | -3 | 3.26  | 0.28  |      |
| 7 | -5 | -3 | 3.16  | 0.25  |      |
| - | 7  | 5  | 2     | 0.36  | 0.15 |
| 7 | -5 | -2 | 0.12  | 0.15  |      |
| - | 7  | -5 | 2     | 0.07  | 0.13 |
| 7 | -5 | -2 | 0.37  | 0.16  |      |
| 7 | 5  | -1 | 10.88 | 0.58  |      |
| 7 | -5 | -1 | 10.27 | 0.44  |      |
| - | 7  | -5 | 1     | 9.70  | 0.42 |
| 7 | -5 | -1 | 9.86  | 0.52  |      |
| - | 7  | 5  | 0     | 0.08  | 0.06 |
| 7 | 5  | 0  | 0.20  | 0.23  |      |
| 7 | -5 | 0  | 0.54  | 0.14  |      |
| 7 | -5 | 0  | 0.06  | 0.20  |      |
| - | 7  | 5  | -1    | 5.40  | 0.32 |
| 7 | 5  | 1  | 4.14  | 0.44  |      |
| - | 7  | -5 | -1    | 4.80  | 0.31 |
| 7 | -5 | 1  | 5.33  | 0.38  |      |
| - | 7  | 5  | -2    | 6.93  | 0.41 |
| 7 | 5  | 2  | 7.13  | 0.46  |      |
| 7 | -5 | 2  | 7.11  | 0.42  |      |
| - | 7  | 5  | -3    | 1.94  | 0.23 |
| 7 | 5  | 3  | 2.33  | 0.28  |      |
| 7 | -5 | 3  | 2.72  | 0.35  |      |
| - | 7  | -5 | -3    | 2.31  | 0.26 |
| 7 | 5  | 4  | -0.20 | 0.22  |      |
| - | 7  | 5  | -4    | -0.40 | 0.21 |
| 7 | -5 | 4  | 0.07  | 0.26  |      |
| - | 7  | -5 | -4    | 0.12  | 0.18 |
| 7 | 5  | 5  | 4.83  | 0.44  |      |
| - | 7  | 5  | -5    | 4.66  | 0.32 |
| - | 7  | 5  | -5    | 3.31  | 0.41 |
| 7 | -5 | 5  | 4.81  | 0.45  |      |
| - | 7  | -5 | -5    | 4.32  | 0.34 |
| - | 7  | 5  | -6    | 0.11  | 0.25 |
| - | 7  | 5  | -6    | 0.88  | 0.21 |
| 7 | 5  | 6  | 0.84  | 0.28  |      |
| 7 | -5 | 6  | 1.14  | 0.29  |      |
| - | 7  | -5 | -6    | 0.93  | 0.24 |
| - | 7  | 5  | -7    | 3.99  | 0.35 |
| - | 7  | 5  | -7    | 3.51  | 0.35 |
| 7 | 5  | 7  | 4.41  | 0.46  |      |
| - | 7  | -5 | -7    | 4.28  | 0.42 |
| 7 | -5 | 7  | 3.74  | 0.48  |      |
| - | 7  | 5  | -8    | 1.03  | 0.26 |
| 7 | 5  | 8  | 1.26  | 0.34  |      |
| 7 | -5 | 8  | 1.03  | 0.34  |      |
| - | 7  | -5 | -8    | 1.20  | 0.28 |
| - | 7  | 5  | -9    | 2.55  | 0.32 |
| 7 | 5  | 9  | 3.08  | 0.41  |      |
| 7 | -5 | 9  | 3.28  | 0.46  |      |
| - | 7  | -5 | -9    | 2.99  | 0.35 |

|   |   |    |     |       |      |
|---|---|----|-----|-------|------|
| - | 7 | 5  | -10 | 0.52  | 0.30 |
|   | 7 | -5 | 10  | 0.43  | 0.41 |
| - | 7 | -5 | -10 | 0.07  | 0.33 |
| - | 7 | 5  | -11 | 0.12  | 0.33 |
|   | 7 | -5 | 11  | 0.62  | 0.44 |
|   | 7 | 6  | -14 | 0.87  | 0.39 |
|   | 7 | 6  | -14 | 0.57  | 0.37 |
|   | 7 | -6 | -14 | 0.42  | 0.39 |
|   | 7 | 6  | -13 | 0.98  | 0.37 |
|   | 7 | 6  | -13 | 1.11  | 0.35 |
|   | 7 | -6 | -13 | 1.14  | 0.37 |
|   | 7 | 6  | -12 | 1.87  | 0.32 |
|   | 7 | 6  | -12 | 1.34  | 0.34 |
|   | 7 | -6 | -12 | 1.04  | 0.34 |
|   | 7 | 6  | -11 | 6.38  | 0.53 |
|   | 7 | 6  | -11 | 6.60  | 0.45 |
|   | 7 | -6 | -11 | 6.29  | 0.46 |
|   | 7 | 6  | -10 | 0.90  | 0.24 |
|   | 7 | 6  | -10 | 0.70  | 0.30 |
|   | 7 | -6 | -10 | 0.24  | 0.29 |
|   | 7 | 6  | -9  | 2.07  | 0.24 |
|   | 7 | 6  | -9  | 1.43  | 0.31 |
|   | 7 | -6 | -9  | 1.25  | 0.28 |
|   | 7 | 6  | -8  | 1.70  | 0.29 |
|   | 7 | 6  | -8  | 1.58  | 0.20 |
|   | 7 | -6 | -8  | 1.47  | 0.25 |
|   | 7 | 6  | -7  | 11.95 | 0.63 |
|   | 7 | 6  | -7  | 12.38 | 0.51 |
| - | 7 | 6  | 7   | 11.77 | 0.52 |
|   | 7 | -6 | -7  | 13.15 | 0.57 |
|   | 7 | 6  | -6  | 14.35 | 0.55 |
| - | 7 | 6  | 6   | 14.02 | 0.59 |
|   | 7 | 6  | -6  | 14.31 | 0.71 |
|   | 7 | -6 | -6  | 15.01 | 0.60 |
| - | 7 | 6  | 5   | 31.46 | 1.17 |
|   | 7 | 6  | -5  | 31.42 | 1.39 |
|   | 7 | 6  | -5  | 30.39 | 1.09 |
| - | 7 | -6 | 5   | 31.02 | 1.15 |
|   | 7 | -6 | -5  | 30.74 | 1.34 |
|   | 7 | -6 | -5  | 33.51 | 1.14 |
| - | 7 | 6  | 4   | 2.11  | 0.25 |
|   | 7 | -6 | -4  | 1.95  | 0.20 |
| - | 7 | -6 | 4   | 1.93  | 0.20 |
|   | 7 | -6 | -4  | 2.23  | 0.22 |
| - | 7 | 6  | 3   | 19.53 | 0.74 |
|   | 7 | -6 | -3  | 18.70 | 0.84 |
|   | 7 | -6 | -3  | 18.08 | 0.70 |
| - | 7 | -6 | 3   | 18.91 | 0.72 |
|   | 7 | 6  | -2  | 0.14  | 0.18 |
| - | 7 | 6  | 2   | 0.13  | 0.15 |
|   | 7 | -6 | -2  | 0.09  | 0.16 |
|   | 7 | -6 | -2  | 0.03  | 0.16 |
| - | 7 | -6 | 2   | -0.12 | 0.13 |
|   | 7 | 6  | -1  | 9.99  | 0.55 |

|   |   |    |     |       |      |
|---|---|----|-----|-------|------|
| - | 7 | -6 | 1   | 8.50  | 0.39 |
|   | 7 | -6 | -1  | 8.42  | 0.48 |
|   | 7 | -6 | -1  | 9.57  | 0.40 |
|   | 7 | 6  | 0   | 0.29  | 0.22 |
| - | 7 | 6  | 0   | 0.25  | 0.12 |
| - | 7 | -6 | 0   | 0.29  | 0.14 |
|   | 7 | -6 | 0   | 0.16  | 0.20 |
|   | 7 | -6 | 0   | 0.33  | 0.14 |
|   | 7 | 6  | 1   | 0.30  | 0.25 |
| - | 7 | 6  | -1  | 1.01  | 0.19 |
|   | 7 | -6 | 1   | 0.95  | 0.20 |
| - | 7 | -6 | -1  | 0.74  | 0.17 |
|   | 7 | 6  | 2   | 0.55  | 0.25 |
| - | 7 | 6  | -2  | 1.03  | 0.18 |
|   | 7 | -6 | 2   | 1.17  | 0.22 |
| - | 7 | -6 | -2  | 0.84  | 0.16 |
| - | 7 | 6  | -3  | 4.36  | 0.33 |
|   | 7 | 6  | 3   | 4.08  | 0.45 |
|   | 7 | -6 | 3   | 5.00  | 0.40 |
| - | 7 | -6 | -3  | 4.26  | 0.31 |
| - | 7 | 6  | -4  | 16.05 | 0.73 |
|   | 7 | 6  | 4   | 19.09 | 0.88 |
|   | 7 | -6 | 4   | 17.87 | 0.86 |
| - | 7 | -6 | -4  | 18.20 | 0.74 |
| - | 7 | 6  | -5  | 10.01 | 0.46 |
| - | 7 | 6  | -5  | 8.65  | 0.53 |
|   | 7 | 6  | 5   | 10.94 | 0.61 |
|   | 7 | -6 | 5   | 9.71  | 0.57 |
| - | 7 | -6 | -5  | 9.87  | 0.51 |
|   | 7 | 6  | 6   | 0.33  | 0.29 |
| - | 7 | 6  | -6  | -0.27 | 0.25 |
| - | 7 | 6  | -6  | 0.15  | 0.21 |
|   | 7 | -6 | 6   | 0.42  | 0.29 |
| - | 7 | -6 | -6  | 0.03  | 0.24 |
| - | 7 | 6  | -7  | 0.04  | 0.21 |
|   | 7 | 6  | 7   | 0.57  | 0.28 |
| - | 7 | 6  | -7  | -0.39 | 0.27 |
|   | 7 | -6 | 7   | 0.42  | 0.33 |
| - | 7 | -6 | -7  | 0.10  | 0.25 |
| - | 7 | 6  | -8  | 0.14  | 0.23 |
|   | 7 | 6  | 8   | 0.14  | 0.30 |
|   | 7 | -6 | 8   | 0.30  | 0.36 |
| - | 7 | -6 | -8  | 0.17  | 0.28 |
| - | 7 | 6  | -9  | 3.30  | 0.34 |
|   | 7 | 6  | 9   | 4.96  | 0.52 |
|   | 7 | -6 | 9   | 4.69  | 0.55 |
| - | 7 | -6 | -9  | 4.94  | 0.49 |
| - | 7 | 6  | -10 | 1.45  | 0.30 |
| - | 7 | -6 | -10 | 1.25  | 0.35 |
|   | 7 | -6 | 10  | 1.42  | 0.40 |
| - | 7 | 6  | -11 | 0.26  | 0.34 |
|   | 7 | 7  | -14 | -0.06 | 0.38 |
|   | 7 | 7  | -14 | -0.16 | 0.37 |
|   | 7 | -7 | -14 | -0.64 | 0.34 |

|   |    |     |       |            |
|---|----|-----|-------|------------|
| 7 | 7  | -13 | 0.90  | 0.35       |
| 7 | 7  | -13 | 1.23  | 0.38       |
| 7 | -7 | -13 | 0.82  | 0.36       |
| 7 | 7  | -12 | 2.54  | 0.34       |
| 7 | 7  | -12 | 2.63  | 0.38       |
| 7 | -7 | -12 | 2.28  | 0.38       |
| 7 | 7  | -11 | 5.65  | 0.44       |
| 7 | 7  | -11 | 5.55  | 0.53       |
| 7 | -7 | -11 | 5.64  | 0.51       |
| 7 | 7  | -10 | 0.96  | 0.24       |
| 7 | 7  | -10 | 0.76  | 0.31       |
| 7 | -7 | -10 | 0.51  | 0.29       |
| 7 | 7  | -9  | 5.64  | 0.50       |
| 7 | 7  | -9  | 5.67  | 0.37       |
| 7 | -7 | -9  | 5.87  | 0.45       |
| 7 | 7  | -8  | 17.06 | 0.69       |
| 7 | 7  | -8  | 16.93 | 0.87       |
| 7 | -7 | -8  | 17.81 | 0.74       |
| - | 7  | 7   | 7     | 6.15 0.37  |
| 7 | 7  | -7  | 6.79  | 0.36       |
| 7 | 7  | -7  | 6.92  | 0.50       |
| 7 | -7 | -7  | 6.90  | 0.40       |
| 7 | 7  | -6  | 12.21 | 0.63       |
| - | 7  | 7   | 6     | 11.37 0.51 |
| 7 | 7  | -6  | 12.00 | 0.48       |
| 7 | -7 | -6  | 11.79 | 0.52       |
| - | 7  | 7   | 5     | 2.29 0.27  |
| 7 | 7  | -5  | 2.32  | 0.28       |
| - | 7  | -7  | 5     | 2.41 0.23  |
| 7 | -7 | -5  | 2.51  | 0.24       |
| - | 7  | 7   | 4     | 9.29 0.43  |
| 7 | -7 | -4  | 9.00  | 0.45       |
| 7 | -7 | -4  | 9.13  | 0.45       |
| - | 7  | -7  | 4     | 9.03 0.40  |
| - | 7  | 7   | 3     | 0.51 0.15  |
| 7 | 7  | -3  | 0.49  | 0.18       |
| 7 | -7 | -3  | 0.36  | 0.15       |
| 7 | -7 | -3  | 0.10  | 0.16       |
| - | 7  | -7  | 3     | 0.38 0.13  |
| - | 7  | 7   | 2     | 1.00 0.15  |
| 7 | 7  | -2  | 1.39  | 0.23       |
| - | 7  | -7  | 2     | 1.24 0.15  |
| 7 | -7 | -2  | 1.06  | 0.18       |
| 7 | -7 | -2  | 0.95  | 0.18       |
| 7 | 7  | -1  | 0.50  | 0.24       |
| 7 | -7 | -1  | 0.66  | 0.15       |
| 7 | -7 | -1  | 0.11  | 0.20       |
| - | 7  | -7  | 1     | 0.38 0.15  |
| - | 7  | 7   | 0     | 14.80 0.63 |
| 7 | 7  | 0   | 16.48 | 0.80       |
| 7 | -7 | 0   | 15.66 | 0.60       |
| 7 | -7 | 0   | 15.23 | 0.73       |
| - | 7  | -7  | 0     | 15.71 0.63 |
| - | 7  | 7   | -1    | 7.03 0.40  |

|   |    |     |       |       |      |
|---|----|-----|-------|-------|------|
| 7 | 7  | 1   | 6.18  | 0.46  |      |
| 7 | -7 | 1   | 6.51  | 0.42  |      |
| - | 7  | -7  | -1    | 6.37  | 0.37 |
| - | 7  | 7   | -2    | 11.01 | 0.50 |
| 7 | 7  | 2   | 7.97  | 0.60  |      |
| 7 | -7 | 2   | 10.29 | 0.55  |      |
| - | 7  | -7  | -2    | 10.64 | 0.48 |
| - | 7  | 7   | -3    | 10.27 | 0.52 |
| 7 | 7  | 3   | 9.83  | 0.62  |      |
| - | 7  | -7  | -3    | 10.48 | 0.50 |
| 7 | -7 | 3   | 10.51 | 0.58  |      |
| 7 | 7  | 4   | -0.28 | 0.26  |      |
| - | 7  | 7   | -4    | 0.06  | 0.21 |
| 7 | -7 | 4   | 0.31  | 0.27  |      |
| - | 7  | -7  | -4    | 0.28  | 0.21 |
| 7 | 7  | 5   | 1.01  | 0.28  |      |
| - | 7  | 7   | -5    | 0.73  | 0.23 |
| - | 7  | -7  | -5    | 1.03  | 0.24 |
| 7 | -7 | 5   | 0.89  | 0.30  |      |
| - | 7  | 7   | -6    | 13.31 | 0.70 |
| 7 | 7  | 6   | 16.15 | 0.78  |      |
| - | 7  | 7   | -6    | 14.35 | 0.62 |
| 7 | -7 | 6   | 14.69 | 0.79  |      |
| - | 7  | -7  | -6    | 14.89 | 0.67 |
| 7 | 7  | 7   | 1.40  | 0.31  |      |
| - | 7  | 7   | -7    | 0.74  | 0.28 |
| - | 7  | 7   | -7    | 0.90  | 0.26 |
| 7 | -7 | 7   | 0.98  | 0.34  |      |
| - | 7  | -7  | -7    | 0.99  | 0.27 |
| 7 | 7  | 8   | 3.74  | 0.39  |      |
| - | 7  | 7   | -8    | 3.05  | 0.32 |
| - | 7  | -7  | -8    | 3.70  | 0.44 |
| 7 | -7 | 8   | 3.09  | 0.44  |      |
| - | 7  | 7   | -9    | 0.17  | 0.29 |
| - | 7  | -7  | -9    | 0.53  | 0.31 |
| 7 | -7 | 9   | 0.75  | 0.36  |      |
| - | 7  | 7   | -10   | 1.40  | 0.33 |
| - | 7  | -7  | -10   | 1.43  | 0.35 |
| 7 | -7 | 10  | 1.33  | 0.44  |      |
| - | 7  | 7   | -11   | 1.10  | 0.33 |
| 7 | 8  | -14 | 0.05  | 0.40  |      |
| 7 | 8  | -14 | -0.31 | 0.38  |      |
| 7 | 8  | -13 | 1.76  | 0.40  |      |
| 7 | 8  | -13 | 1.74  | 0.36  |      |
| 7 | -8 | -13 | 1.14  | 0.34  |      |
| 7 | 8  | -12 | 0.06  | 0.30  |      |
| 7 | 8  | -12 | 0.16  | 0.36  |      |
| 7 | -8 | -12 | -0.03 | 0.35  |      |
| 7 | 8  | -11 | 7.82  | 0.61  |      |
| 7 | 8  | -11 | 8.15  | 0.50  |      |
| 7 | -8 | -11 | 7.91  | 0.55  |      |
| 7 | 8  | -10 | 1.43  | 0.34  |      |
| 7 | 8  | -10 | 1.56  | 0.26  |      |
| 7 | -8 | -10 | 1.55  | 0.31  |      |

|   |    |    |       |       |      |
|---|----|----|-------|-------|------|
| 7 | 8  | -9 | 0.39  | 0.31  |      |
| 7 | 8  | -9 | 0.45  | 0.21  |      |
| 7 | -8 | -9 | 0.10  | 0.25  |      |
| 7 | 8  | -8 | 3.16  | 0.44  |      |
| 7 | 8  | -8 | 3.58  | 0.29  |      |
| 7 | -8 | -8 | 3.43  | 0.31  |      |
| 7 | 8  | -7 | 2.72  | 0.32  |      |
| 7 | 8  | -7 | 2.11  | 0.24  |      |
| 7 | -8 | -7 | 1.88  | 0.24  |      |
| 7 | 8  | -6 | -0.03 | 0.23  |      |
| - | 7  | 8  | 6     | 0.04  | 0.17 |
| 7 | -8 | -6 | 0.02  | 0.20  |      |
| - | 7  | 8  | 5     | 3.35  | 0.27 |
| 7 | 8  | -5 | 3.54  | 0.36  |      |
| - | 7  | -8 | 5     | 3.45  | 0.23 |
| 7 | -8 | -5 | 3.58  | 0.31  |      |
| - | 7  | 8  | 4     | 6.03  | 0.36 |
| 7 | 8  | -4 | 6.32  | 0.43  |      |
| 7 | -8 | -4 | 6.22  | 0.38  |      |
| - | 7  | -8 | 4     | 5.91  | 0.31 |
| - | 7  | 8  | 3     | 4.23  | 0.31 |
| 7 | 8  | -3 | 4.30  | 0.41  |      |
| 7 | -8 | -3 | 3.98  | 0.29  |      |
| - | 7  | -8 | 3     | 3.77  | 0.27 |
| 7 | -8 | -3 | 3.39  | 0.29  |      |
| 7 | 8  | -2 | 0.27  | 0.24  |      |
| - | 7  | 8  | 2     | 0.29  | 0.15 |
| 7 | -8 | -2 | -0.09 | 0.17  |      |
| 7 | -8 | -2 | -0.15 | 0.16  |      |
| - | 7  | -8 | 2     | 0.04  | 0.15 |
| 7 | 8  | -1 | 53.48 | 2.21  |      |
| 7 | -8 | -1 | 51.02 | 1.77  |      |
| - | 7  | -8 | 1     | 49.46 | 1.84 |
| 7 | -8 | -1 | 49.42 | 2.16  |      |
| - | 7  | 8  | 0     | 6.13  | 0.37 |
| 7 | 8  | 0  | 6.32  | 0.47  |      |
| - | 7  | -8 | 0     | 5.18  | 0.31 |
| 7 | -8 | 0  | 5.18  | 0.38  |      |
| 7 | -8 | 0  | 5.46  | 0.33  |      |
| - | 7  | 8  | -1    | 0.81  | 0.20 |
| 7 | 8  | 1  | 0.25  | 0.26  |      |
| 7 | -8 | 1  | 0.46  | 0.22  |      |
| - | 7  | -8 | -1    | 0.71  | 0.18 |
| - | 7  | 8  | -2    | 1.21  | 0.21 |
| 7 | 8  | 2  | 0.53  | 0.27  |      |
| - | 7  | -8 | -2    | 1.46  | 0.21 |
| 7 | -8 | 2  | 1.29  | 0.25  |      |
| - | 7  | 8  | -3    | 0.58  | 0.21 |
| 7 | -8 | 3  | 0.66  | 0.26  |      |
| - | 7  | -8 | -3    | 0.64  | 0.19 |
| 7 | 8  | 4  | -0.27 | 0.27  |      |
| - | 7  | 8  | -4    | 0.04  | 0.21 |
| - | 7  | -8 | -4    | 0.18  | 0.22 |
| 7 | -8 | 4  | 0.19  | 0.28  |      |

|   |    |     |       |      |      |
|---|----|-----|-------|------|------|
| 7 | 8  | 5   | 5.42  | 0.49 |      |
| - | 7  | 8   | -5    | 5.31 | 0.45 |
| - | 7  | -8  | -5    | 5.22 | 0.37 |
| 7 | -8 | 5   | 4.98  | 0.43 |      |
| - | 7  | 8   | -6    | 1.65 | 0.28 |
| 7 | 8  | 6   | 2.07  | 0.32 |      |
| - | 7  | 8   | -6    | 1.84 | 0.26 |
| - | 7  | -8  | -6    | 1.44 | 0.27 |
| 7 | -8 | 6   | 1.60  | 0.31 |      |
| - | 7  | 8   | -7    | 0.01 | 0.25 |
| 7 | 8  | 7   | -0.13 | 0.32 |      |
| 7 | -8 | 7   | 0.15  | 0.31 |      |
| - | 7  | -8  | -7    | 0.22 | 0.24 |
| - | 7  | 8   | -8    | 0.11 | 0.28 |
| 7 | -8 | 8   | 0.18  | 0.37 |      |
| - | 7  | -8  | -8    | 0.18 | 0.26 |
| - | 7  | 8   | -9    | 1.14 | 0.31 |
| - | 7  | -8  | -9    | 1.16 | 0.32 |
| 7 | -8 | 9   | 0.88  | 0.41 |      |
| - | 7  | 8   | -10   | 0.39 | 0.33 |
| - | 7  | -8  | -10   | 0.56 | 0.35 |
| 7 | -8 | 10  | 0.20  | 0.40 |      |
| 7 | 9  | -14 | 0.19  | 0.39 |      |
| 7 | 9  | -13 | 1.17  | 0.42 |      |
| 7 | 9  | -13 | 1.24  | 0.36 |      |
| 7 | -9 | -13 | 1.26  | 0.38 |      |
| 7 | 9  | -12 | 3.01  | 0.44 |      |
| 7 | 9  | -12 | 3.48  | 0.37 |      |
| 7 | -9 | -12 | 3.34  | 0.37 |      |
| 7 | 9  | -11 | 0.69  | 0.34 |      |
| 7 | 9  | -11 | 0.80  | 0.28 |      |
| 7 | -9 | -11 | 0.27  | 0.30 |      |
| 7 | 9  | -10 | 0.92  | 0.25 |      |
| 7 | 9  | -10 | 0.33  | 0.31 |      |
| 7 | -9 | -10 | 0.39  | 0.31 |      |
| 7 | 9  | -9  | 0.30  | 0.33 |      |
| 7 | -9 | -9  | 0.28  | 0.29 |      |
| 7 | 9  | -8  | 10.56 | 0.66 |      |
| 7 | -9 | -8  | 10.86 | 0.53 |      |
| 7 | 9  | -7  | 4.19  | 0.47 |      |
| 7 | -9 | -7  | 3.51  | 0.40 |      |
| 7 | 9  | -6  | 5.83  | 0.48 |      |
| - | 7  | 9   | 6     | 5.44 | 0.36 |
| 7 | -9 | -6  | 5.53  | 0.37 |      |
| - | 7  | 9   | 5     | 3.06 | 0.30 |
| 7 | 9  | -5  | 3.45  | 0.38 |      |
| 7 | -9 | -5  | 3.51  | 0.36 |      |
| - | 7  | -9  | 5     | 3.03 | 0.25 |
| 7 | 9  | -4  | 7.45  | 0.50 |      |
| - | 7  | 9   | 4     | 6.75 | 0.39 |
| - | 7  | -9  | 4     | 6.69 | 0.34 |
| 7 | -9 | -4  | 6.77  | 0.41 |      |
| - | 7  | 9   | 3     | 7.30 | 0.40 |
| 7 | 9  | -3  | 6.79  | 0.46 |      |

|   |   |    |     |       |      |
|---|---|----|-----|-------|------|
| - | 7 | -9 | 3   | 7.04  | 0.34 |
|   | 7 | -9 | -3  | 6.56  | 0.37 |
|   | 7 | 9  | -2  | 43.14 | 1.81 |
| - | 7 | 9  | 2   | 40.56 | 1.52 |
| - | 7 | -9 | 2   | 40.72 | 1.50 |
|   | 7 | -9 | -2  | 40.90 | 1.76 |
|   | 7 | -9 | -2  | 40.27 | 1.45 |
| - | 7 | 9  | 1   | 4.32  | 0.31 |
|   | 7 | 9  | -1  | 4.99  | 0.45 |
| - | 7 | -9 | 1   | 3.95  | 0.30 |
|   | 7 | -9 | -1  | 4.31  | 0.35 |
|   | 7 | -9 | -1  | 4.26  | 0.31 |
|   | 7 | 9  | 0   | 0.63  | 0.26 |
| - | 7 | 9  | 0   | 0.54  | 0.20 |
|   | 7 | -9 | 0   | 0.48  | 0.19 |
| - | 7 | -9 | 0   | 0.52  | 0.18 |
|   | 7 | -9 | 0   | 0.54  | 0.21 |
|   | 7 | 9  | 1   | 0.71  | 0.27 |
| - | 7 | 9  | -1  | 1.10  | 0.21 |
|   | 7 | -9 | 1   | 0.96  | 0.22 |
| - | 7 | -9 | -1  | 0.90  | 0.18 |
| - | 7 | 9  | -2  | 5.89  | 0.39 |
|   | 7 | 9  | 2   | 3.86  | 0.48 |
| - | 7 | -9 | -2  | 5.19  | 0.36 |
|   | 7 | -9 | 2   | 5.13  | 0.40 |
|   | 7 | 9  | 3   | 2.82  | 0.34 |
| - | 7 | 9  | -3  | 3.90  | 0.37 |
| - | 7 | -9 | -3  | 3.68  | 0.35 |
|   | 7 | -9 | 3   | 3.83  | 0.39 |
| - | 7 | 9  | -4  | 1.51  | 0.24 |
|   | 7 | 9  | 4   | 0.78  | 0.30 |
|   | 7 | -9 | 4   | 1.50  | 0.30 |
| - | 7 | -9 | -4  | 1.51  | 0.24 |
| - | 7 | 9  | -5  | 0.49  | 0.23 |
|   | 7 | 9  | 5   | -0.03 | 0.29 |
| - | 7 | -9 | -5  | 0.33  | 0.24 |
|   | 7 | -9 | 5   | 0.33  | 0.30 |
|   | 7 | 9  | 6   | 9.71  | 0.66 |
| - | 7 | 9  | -6  | 8.84  | 0.53 |
|   | 7 | -9 | 6   | 9.33  | 0.60 |
| - | 7 | -9 | -6  | 8.86  | 0.53 |
| - | 7 | 9  | -7  | 2.48  | 0.28 |
|   | 7 | -9 | 7   | 2.63  | 0.39 |
| - | 7 | -9 | -7  | 3.13  | 0.37 |
| - | 7 | 9  | -8  | 0.07  | 0.28 |
| - | 7 | -9 | -8  | 0.44  | 0.30 |
|   | 7 | -9 | 8   | 0.58  | 0.38 |
| - | 7 | 9  | -9  | 0.18  | 0.32 |
|   | 7 | -9 | 9   | 0.73  | 0.42 |
| - | 7 | -9 | -9  | 0.38  | 0.32 |
| - | 7 | 9  | -10 | 0.93  | 0.35 |
| - | 7 | -9 | -10 | 0.76  | 0.37 |
|   | 7 | -9 | 10  | 1.05  | 0.45 |
|   | 7 | 10 | -13 | 0.20  | 0.42 |

|   |     |     |       |       |      |
|---|-----|-----|-------|-------|------|
| 7 | -10 | -13 | -0.30 | 0.38  |      |
| 7 | 10  | -12 | 0.11  | 0.40  |      |
| 7 | -10 | -12 | -0.50 | 0.32  |      |
| 7 | 10  | -11 | 1.92  | 0.38  |      |
| 7 | -10 | -11 | 1.52  | 0.32  |      |
| 7 | 10  | -10 | 0.18  | 0.36  |      |
| 7 | -10 | -10 | 0.07  | 0.31  |      |
| 7 | 10  | -9  | 2.70  | 0.39  |      |
| 7 | -10 | -9  | 2.48  | 0.32  |      |
| 7 | 10  | -8  | 0.13  | 0.32  |      |
| 7 | -10 | -8  | 0.24  | 0.24  |      |
| 7 | 10  | -7  | 7.95  | 0.58  |      |
| 7 | -10 | -7  | 7.71  | 0.49  |      |
| 7 | 10  | -6  | 1.72  | 0.31  |      |
| 7 | -10 | -6  | 1.19  | 0.23  |      |
| - | 7   | 10  | 5     | 27.90 | 1.10 |
| 7 | 10  | -5  | 29.59 | 1.32  |      |
| 7 | -10 | -5  | 29.97 | 1.07  |      |
| 7 | 10  | -4  | 1.25  | 0.26  |      |
| - | 7   | 10  | 4     | 1.16  | 0.20 |
| - | 7   | -10 | 4     | 1.11  | 0.16 |
| 7 | -10 | -4  | 0.93  | 0.23  |      |
| - | 7   | 10  | 3     | 3.89  | 0.34 |
| 7 | 10  | -3  | 4.04  | 0.44  |      |
| - | 7   | -10 | 3     | 3.98  | 0.29 |
| 7 | -10 | -3  | 3.56  | 0.35  |      |
| 7 | 10  | -2  | 3.14  | 0.42  |      |
| - | 7   | 10  | 2     | 2.22  | 0.24 |
| 7 | -10 | -2  | 2.80  | 0.29  |      |
| - | 7   | -10 | 2     | 2.53  | 0.26 |
| 7 | -10 | -2  | 2.62  | 0.31  |      |
| 7 | 10  | -1  | 4.21  | 0.45  |      |
| - | 7   | 10  | 1     | 3.78  | 0.35 |
| 7 | -10 | -1  | 3.57  | 0.31  |      |
| 7 | -10 | -1  | 3.86  | 0.33  |      |
| - | 7   | -10 | 1     | 4.01  | 0.30 |
| - | 7   | 10  | 0     | 10.38 | 0.48 |
| 7 | 10  | 0   | 9.91  | 0.59  |      |
| - | 7   | -10 | 0     | 10.15 | 0.46 |
| 7 | -10 | 0   | 10.09 | 0.46  |      |
| 7 | -10 | 0   | 10.08 | 0.54  |      |
| 7 | 10  | 1   | 1.47  | 0.26  |      |
| - | 7   | 10  | -1    | 1.43  | 0.23 |
| 7 | -10 | 1   | 1.24  | 0.24  |      |
| - | 7   | -10 | -1    | 1.13  | 0.19 |
| 7 | 10  | 2   | 0.76  | 0.29  |      |
| - | 7   | 10  | -2    | 1.09  | 0.21 |
| 7 | -10 | 2   | 1.38  | 0.26  |      |
| - | 7   | -10 | -2    | 1.28  | 0.22 |
| - | 7   | 10  | -3    | 8.80  | 0.46 |
| 7 | 10  | 3   | 7.74  | 0.60  |      |
| 7 | -10 | 3   | 9.24  | 0.54  |      |
| - | 7   | -10 | -3    | 9.39  | 0.45 |
| - | 7   | 10  | -4    | 1.06  | 0.24 |

|   |     |     |       |       |      |
|---|-----|-----|-------|-------|------|
| 7 | 10  | 4   | 0.47  | 0.30  |      |
| - | 7   | -10 | -4    | 1.30  | 0.23 |
| 7 | -10 | 4   | 1.04  | 0.29  |      |
| - | 7   | 10  | -5    | 4.44  | 0.41 |
| 7 | 10  | 5   | 4.36  | 0.41  |      |
| - | 7   | -10 | -5    | 5.16  | 0.37 |
| 7 | -10 | 5   | 4.78  | 0.47  |      |
| - | 7   | 10  | -6    | 0.59  | 0.26 |
| 7 | -10 | 6   | 0.12  | 0.33  |      |
| - | 7   | -10 | -6    | 0.13  | 0.24 |
| - | 7   | -10 | -7    | 2.90  | 0.33 |
| 7 | -10 | 7   | 2.70  | 0.40  |      |
| - | 7   | 10  | -8    | 0.29  | 0.30 |
| 7 | -10 | 8   | 0.17  | 0.38  |      |
| - | 7   | -10 | -8    | 0.12  | 0.28 |
| - | 7   | 10  | -9    | 0.27  | 0.33 |
| - | 7   | -10 | -9    | 0.24  | 0.33 |
| 7 | -10 | 9   | 0.43  | 0.42  |      |
| - | 7   | 10  | -10   | 2.86  | 0.39 |
| - | 7   | -10 | -10   | 2.25  | 0.39 |
| 7 | 11  | -13 | 0.99  | 0.45  |      |
| 7 | 11  | -12 | 0.17  | 0.42  |      |
| 7 | -11 | -12 | 0.19  | 0.33  |      |
| 7 | 11  | -11 | 0.80  | 0.41  |      |
| 7 | -11 | -11 | 0.61  | 0.31  |      |
| 7 | 11  | -10 | 0.27  | 0.37  |      |
| 7 | -11 | -10 | -0.18 | 0.32  |      |
| 7 | 11  | -9  | 4.28  | 0.54  |      |
| 7 | -11 | -9  | 4.11  | 0.46  |      |
| 7 | 11  | -8  | 1.82  | 0.34  |      |
| 7 | -11 | -8  | 1.79  | 0.28  |      |
| 7 | 11  | -7  | 1.22  | 0.34  |      |
| 7 | -11 | -7  | 0.78  | 0.25  |      |
| 7 | 11  | -6  | 5.15  | 0.51  |      |
| 7 | -11 | -6  | 4.96  | 0.41  |      |
| 7 | 11  | -5  | 1.13  | 0.28  |      |
| - | 7   | 11  | 5     | 0.93  | 0.20 |
| 7 | -11 | -5  | 1.12  | 0.23  |      |
| 7 | 11  | -4  | 4.09  | 0.45  |      |
| - | 7   | 11  | 4     | 3.38  | 0.30 |
| - | 7   | -11 | 4     | 3.51  | 0.28 |
| 7 | -11 | -4  | 3.22  | 0.33  |      |
| - | 7   | 11  | 3     | 4.12  | 0.32 |
| 7 | 11  | -3  | 5.04  | 0.46  |      |
| 7 | -11 | -3  | 3.95  | 0.33  |      |
| - | 7   | -11 | 3     | 3.80  | 0.29 |
| 7 | 11  | -2  | 8.67  | 0.57  |      |
| - | 7   | 11  | 2     | 8.36  | 0.46 |
| 7 | -11 | -2  | 8.69  | 0.46  |      |
| - | 7   | -11 | 2     | 8.15  | 0.41 |
| 7 | 11  | -1  | 0.34  | 0.25  |      |
| - | 7   | 11  | 1     | 0.16  | 0.21 |
| 7 | -11 | -1  | 0.18  | 0.20  |      |
| - | 7   | -11 | 1     | -0.07 | 0.18 |

|   |     |     |       |       |      |
|---|-----|-----|-------|-------|------|
| 7 | -11 | -1  | 0.12  | 0.20  |      |
| 7 | 11  | 0   | 1.89  | 0.30  |      |
| - | 7   | 11  | 0     | 1.79  | 0.24 |
| - | 7   | -11 | 0     | 1.65  | 0.22 |
| 7 | -11 | 0   | 1.94  | 0.24  |      |
| 7 | -11 | 0   | 1.77  | 0.22  |      |
| - | 7   | 11  | -1    | 4.25  | 0.35 |
| 7 | 11  | 1   | 3.87  | 0.47  |      |
| 7 | -11 | 1   | 4.39  | 0.38  |      |
| - | 7   | -11 | -1    | 4.60  | 0.35 |
| 7 | -11 | 1   | 4.17  | 0.37  |      |
| - | 7   | 11  | -2    | 11.78 | 0.56 |
| 7 | 11  | 2   | 10.76 | 0.66  |      |
| - | 7   | -11 | -2    | 10.99 | 0.54 |
| 7 | -11 | 2   | 10.91 | 0.60  |      |
| 7 | 11  | 3   | -0.44 | 0.28  |      |
| - | 7   | 11  | -3    | 0.23  | 0.21 |
| 7 | -11 | 3   | -0.21 | 0.26  |      |
| - | 7   | -11 | -3    | 0.13  | 0.21 |
| - | 7   | 11  | -4    | 0.48  | 0.23 |
| 7 | 11  | 4   | -0.54 | 0.31  |      |
| - | 7   | -11 | -4    | 0.23  | 0.22 |
| 7 | -11 | 4   | 0.71  | 0.30  |      |
| 7 | 11  | 5   | -0.66 | 0.30  |      |
| - | 7   | 11  | -5    | 0.29  | 0.24 |
| - | 7   | -11 | -5    | 0.11  | 0.24 |
| 7 | -11 | 5   | 0.54  | 0.29  |      |
| - | 7   | 11  | -6    | 2.13  | 0.28 |
| - | 7   | -11 | -6    | 2.14  | 0.30 |
| 7 | -11 | 6   | 2.06  | 0.37  |      |
| 7 | -11 | 7   | 2.36  | 0.40  |      |
| - | 7   | -11 | -7    | 2.44  | 0.31 |
| 7 | -11 | 8   | 0.80  | 0.41  |      |
| - | 7   | -11 | -8    | 0.54  | 0.32 |
| - | 7   | -11 | -9    | 0.54  | 0.35 |
| 7 | -11 | 9   | 0.55  | 0.43  |      |
| - | 7   | -11 | -10   | 0.48  | 0.37 |
| 7 | 12  | -12 | 0.87  | 0.45  |      |
| 7 | -12 | -12 | 0.46  | 0.38  |      |
| 7 | 12  | -11 | 2.77  | 0.43  |      |
| 7 | -12 | -11 | 2.69  | 0.38  |      |
| 7 | 12  | -10 | 2.59  | 0.41  |      |
| 7 | -12 | -10 | 2.88  | 0.34  |      |
| 7 | 12  | -9  | 1.15  | 0.35  |      |
| 7 | -12 | -9  | 1.04  | 0.30  |      |
| 7 | 12  | -8  | 0.20  | 0.36  |      |
| 7 | -12 | -8  | -0.28 | 0.28  |      |
| 7 | 12  | -7  | -0.08 | 0.33  |      |
| 7 | -12 | -7  | -0.17 | 0.25  |      |
| 7 | 12  | -6  | 0.11  | 0.32  |      |
| 7 | -12 | -6  | 0.03  | 0.23  |      |
| 7 | 12  | -5  | 11.30 | 0.70  |      |
| 7 | -12 | -5  | 12.18 | 0.57  |      |
| 7 | 12  | -4  | 0.95  | 0.31  |      |

|   |   |     |     |       |      |
|---|---|-----|-----|-------|------|
| - | 7 | 12  | 4   | 0.70  | 0.22 |
| - | 7 | -12 | 4   | 0.79  | 0.17 |
|   | 7 | -12 | -4  | 0.86  | 0.22 |
| - | 7 | 12  | 3   | 0.88  | 0.22 |
|   | 7 | 12  | -3  | 0.94  | 0.29 |
| - | 7 | -12 | 3   | 0.87  | 0.18 |
|   | 7 | -12 | -3  | 0.60  | 0.22 |
| - | 7 | 12  | 2   | 3.98  | 0.38 |
|   | 7 | 12  | -2  | 4.17  | 0.42 |
|   | 7 | -12 | -2  | 4.57  | 0.39 |
| - | 7 | -12 | 2   | 4.35  | 0.32 |
|   | 7 | 12  | -1  | 12.74 | 0.72 |
| - | 7 | 12  | 1   | 12.65 | 0.58 |
|   | 7 | -12 | -1  | 13.15 | 0.58 |
| - | 7 | -12 | 1   | 12.63 | 0.56 |
| - | 7 | 12  | 0   | 0.20  | 0.23 |
|   | 7 | 12  | 0   | 0.33  | 0.28 |
|   | 7 | -12 | 0   | 0.36  | 0.23 |
|   | 7 | -12 | 0   | 0.09  | 0.21 |
| - | 7 | -12 | 0   | 0.02  | 0.20 |
|   | 7 | 12  | 1   | 5.47  | 0.55 |
| - | 7 | 12  | -1  | 5.79  | 0.43 |
|   | 7 | -12 | 1   | 5.69  | 0.38 |
|   | 7 | -12 | 1   | 5.87  | 0.44 |
| - | 7 | -12 | -1  | 6.03  | 0.39 |
|   | 7 | 12  | 2   | -0.05 | 0.29 |
| - | 7 | 12  | -2  | 0.17  | 0.22 |
| - | 7 | -12 | -2  | 0.13  | 0.23 |
|   | 7 | -12 | 2   | 0.02  | 0.26 |
|   | 7 | 12  | 3   | -0.27 | 0.29 |
| - | 7 | 12  | -3  | 0.64  | 0.25 |
|   | 7 | -12 | 3   | 0.49  | 0.28 |
| - | 7 | -12 | -3  | 0.24  | 0.24 |
| - | 7 | 12  | -4  | 0.16  | 0.25 |
|   | 7 | 12  | 4   | -0.31 | 0.29 |
| - | 7 | -12 | -4  | -0.03 | 0.25 |
|   | 7 | -12 | 4   | 0.22  | 0.30 |
| - | 7 | 12  | -5  | 0.35  | 0.25 |
|   | 7 | -12 | 5   | 0.38  | 0.30 |
| - | 7 | -12 | -5  | 0.05  | 0.27 |
|   | 7 | -12 | 6   | 2.47  | 0.39 |
| - | 7 | -12 | -6  | 2.45  | 0.32 |
| - | 7 | -12 | -7  | -0.03 | 0.31 |
|   | 7 | -12 | 7   | 0.22  | 0.38 |
| - | 7 | -12 | -8  | 1.49  | 0.35 |
|   | 7 | -12 | 8   | 1.44  | 0.43 |
| - | 7 | -12 | -9  | 4.54  | 0.55 |
|   | 7 | -12 | 9   | 3.96  | 0.52 |
|   | 7 | 13  | -11 | 1.68  | 0.46 |
|   | 7 | -13 | -11 | 1.72  | 0.35 |
|   | 7 | 13  | -10 | 0.37  | 0.38 |
|   | 7 | -13 | -10 | 0.06  | 0.33 |
|   | 7 | 13  | -9  | 1.55  | 0.41 |
|   | 7 | -13 | -9  | 1.44  | 0.31 |

|   |     |     |       |       |
|---|-----|-----|-------|-------|
| 7 | 13  | -8  | 1.00  | 0.39  |
| 7 | -13 | -8  | 0.64  | 0.31  |
| 7 | 13  | -7  | 0.49  | 0.36  |
| 7 | -13 | -7  | -0.09 | 0.26  |
| 7 | 13  | -6  | 0.93  | 0.35  |
| 7 | -13 | -6  | 0.62  | 0.27  |
| 7 | 13  | -5  | 1.09  | 0.34  |
| 7 | -13 | -5  | 1.20  | 0.27  |
| 7 | 13  | -4  | 0.78  | 0.29  |
| 7 | -13 | -4  | 0.60  | 0.23  |
| - | 7   | -13 | 4     | 0.38  |
| 7 | 13  | -3  | 1.53  | 0.32  |
| - | 7   | 13  | 3     | 1.02  |
| - | 7   | -13 | 3     | 1.26  |
| 7 | -13 | -3  | 1.24  | 0.24  |
| - | 7   | 13  | 2     | 11.84 |
| 7 | 13  | -2  | 11.60 | 0.70  |
| - | 7   | -13 | 2     | 12.12 |
| 7 | -13 | -2  | 12.35 | 0.55  |
| - | 7   | 13  | 1     | 0.08  |
| 7 | 13  | -1  | 0.13  | 0.29  |
| 7 | -13 | -1  | 0.10  | 0.24  |
| - | 7   | -13 | 1     | 0.11  |
| - | 7   | 13  | 0     | 0.28  |
| 7 | 13  | 0   | 0.23  | 0.29  |
| 7 | -13 | 0   | 0.00  | 0.22  |
| - | 7   | -13 | 0     | 0.01  |
| 7 | 13  | 1   | -0.03 | 0.29  |
| - | 7   | 13  | -1    | 0.11  |
| 7 | -13 | 1   | 0.28  | 0.26  |
| 7 | -13 | 1   | 0.09  | 0.22  |
| - | 7   | -13 | -1    | 0.31  |
| - | 7   | 13  | -2    | 1.12  |
| 7 | 13  | 2   | 0.49  | 0.30  |
| - | 7   | -13 | -2    | 0.65  |
| 7 | -13 | 2   | 0.85  | 0.27  |
| - | 7   | 13  | -3    | 1.15  |
| 7 | 13  | 3   | 0.72  | 0.33  |
| 7 | -13 | 3   | 1.08  | 0.31  |
| - | 7   | -13 | -3    | 1.39  |
| - | 7   | 13  | -4    | 0.15  |
| - | 7   | -13 | -4    | 0.12  |
| 7 | -13 | 4   | 0.18  | 0.31  |
| - | 7   | 13  | -5    | 0.70  |
| 7 | -13 | 5   | 0.82  | 0.34  |
| - | 7   | -13 | -5    | 1.05  |
| 7 | -13 | 6   | 2.28  | 0.39  |
| - | 7   | -13 | -6    | 1.96  |
| - | 7   | -13 | -7    | 1.06  |
| 7 | -13 | 7   | 1.28  | 0.40  |
| - | 7   | -13 | -8    | 0.38  |
| 7 | -13 | 8   | 0.51  | 0.43  |
| 7 | 14  | -11 | 0.19  | 0.46  |
| 7 | -14 | -11 | -0.25 | 0.36  |

|   |     |     |      |       |      |
|---|-----|-----|------|-------|------|
| 7 | 14  | -10 | 0.96 | 0.44  |      |
| 7 | -14 | -10 | 0.53 | 0.35  |      |
| 7 | 14  | -9  | 0.38 | 0.41  |      |
| 7 | -14 | -9  | 0.50 | 0.31  |      |
| 7 | 14  | -8  | 0.15 | 0.39  |      |
| 7 | -14 | -8  | 0.29 | 0.29  |      |
| 7 | 14  | -7  | 4.67 | 0.57  |      |
| 7 | -14 | -7  | 5.05 | 0.47  |      |
| 7 | 14  | -6  | 7.54 | 0.61  |      |
| 7 | -14 | -6  | 7.50 | 0.50  |      |
| 7 | 14  | -5  | 2.49 | 0.39  |      |
| 7 | -14 | -5  | 2.15 | 0.31  |      |
| 7 | 14  | -4  | 5.31 | 0.53  |      |
| 7 | -14 | -4  | 5.56 | 0.44  |      |
| - | 7   | 14  | 3    | 2.55  | 0.28 |
| 7 | 14  | -3  | 2.45 | 0.35  |      |
| - | 7   | -14 | 3    | 2.98  | 0.33 |
| 7 | -14 | -3  | 2.37 | 0.27  |      |
| 7 | 14  | -2  | 0.26 | 0.31  |      |
| - | 7   | 14  | 2    | 0.11  | 0.22 |
| - | 7   | -14 | 2    | -0.02 | 0.21 |
| 7 | -14 | -2  | 0.07 | 0.26  |      |
| 7 | 14  | -1  | 2.10 | 0.35  |      |
| - | 7   | 14  | 1    | 1.92  | 0.27 |
| 7 | -14 | -1  | 1.78 | 0.26  |      |
| - | 7   | -14 | 1    | 1.96  | 0.24 |
| - | 7   | 14  | 0    | 0.91  | 0.25 |
| 7 | 14  | 0   | 0.93 | 0.31  |      |
| 7 | -14 | 0   | 0.99 | 0.27  |      |
| - | 7   | -14 | 0    | 1.09  | 0.24 |
| - | 7   | 14  | -1   | 7.52  | 0.49 |
| 7 | 14  | 1   | 6.93 | 0.56  |      |
| - | 7   | -14 | -1   | 7.41  | 0.46 |
| 7 | -14 | 1   | 7.49 | 0.48  |      |
| - | 7   | 14  | -2   | 2.96  | 0.36 |
| 7 | 14  | 2   | 3.02 | 0.38  |      |
| 7 | -14 | 2   | 2.70 | 0.31  |      |
| 7 | -14 | 2   | 3.40 | 0.39  |      |
| - | 7   | -14 | -2   | 3.13  | 0.34 |
| - | 7   | 14  | -3   | 0.31  | 0.26 |
| - | 7   | -14 | -3   | 0.19  | 0.26 |
| 7 | -14 | 3   | 0.07 | 0.30  |      |
| - | 7   | 14  | -4   | 4.48  | 0.45 |
| 7 | -14 | 4   | 4.47 | 0.47  |      |
| - | 7   | -14 | -4   | 4.38  | 0.39 |
| - | 7   | 14  | -5   | 6.64  | 0.50 |
| - | 7   | -14 | -5   | 6.78  | 0.51 |
| 7 | -14 | 5   | 7.00 | 0.55  |      |
| - | 7   | -14 | -6   | -0.02 | 0.28 |
| 7 | -14 | 6   | 0.37 | 0.37  |      |
| 7 | -14 | 7   | 0.26 | 0.40  |      |
| - | 7   | -14 | -7   | 0.21  | 0.33 |
| - | 7   | -14 | -8   | 0.91  | 0.36 |
| 7 | -14 | 8   | 1.31 | 0.45  |      |

|   |     |     |       |      |
|---|-----|-----|-------|------|
| 7 | 15  | -10 | 1.89  | 0.48 |
| 7 | -15 | -10 | 1.70  | 0.37 |
| 7 | 15  | -9  | 0.48  | 0.43 |
| 7 | -15 | -9  | 0.19  | 0.35 |
| 7 | 15  | -8  | 0.34  | 0.40 |
| 7 | -15 | -8  | 0.79  | 0.33 |
| 7 | 15  | -7  | 3.72  | 0.51 |
| 7 | -15 | -7  | 4.60  | 0.48 |
| 7 | 15  | -6  | 0.29  | 0.33 |
| 7 | -15 | -6  | 0.43  | 0.30 |
| 7 | 15  | -5  | 0.73  | 0.36 |
| 7 | -15 | -5  | 0.37  | 0.27 |
| 7 | 15  | -4  | 1.32  | 0.36 |
| 7 | -15 | -4  | 1.33  | 0.30 |
| 7 | 15  | -3  | 0.16  | 0.32 |
| - | 7   | -15 | 3     | 0.21 |
| 7 | -15 | -3  | 0.05  | 0.25 |
| 7 | 15  | -2  | 0.80  | 0.33 |
| - | 7   | 15  | 2     | 0.60 |
| 7 | -15 | -2  | 0.60  | 0.25 |
| - | 7   | -15 | 2     | 0.71 |
| 7 | 15  | -1  | 0.32  | 0.31 |
| - | 7   | 15  | 1     | 0.49 |
| - | 7   | -15 | 1     | 0.45 |
| 7 | -15 | -1  | 0.60  | 0.25 |
| - | 7   | 15  | 0     | 0.30 |
| 7 | 15  | 0   | -0.21 | 0.30 |
| 7 | -15 | 0   | 0.31  | 0.25 |
| - | 7   | -15 | 0     | 0.03 |
| - | 7   | 15  | -1    | 0.41 |
| 7 | 15  | 1   | 0.03  | 0.33 |
| 7 | -15 | 1   | 0.48  | 0.28 |
| - | 7   | -15 | -1    | 0.42 |
| - | 7   | 15  | -2    | 1.75 |
| - | 7   | -15 | -2    | 1.90 |
| 7 | -15 | 2   | 1.46  | 0.31 |
| - | 7   | 15  | -3    | 0.98 |
| - | 7   | -15 | -3    | 1.06 |
| 7 | -15 | 3   | 0.69  | 0.31 |
| - | 7   | 15  | -4    | 0.25 |
| 7 | -15 | 4   | 0.30  | 0.34 |
| - | 7   | -15 | -4    | 0.30 |
| 7 | -15 | 5   | 0.53  | 0.36 |
| - | 7   | -15 | -5    | 0.34 |
| - | 7   | -15 | -6    | 0.89 |
| 7 | -15 | 6   | 0.77  | 0.39 |
| 7 | -15 | 7   | 1.58  | 0.43 |
| - | 7   | -15 | -7    | 1.49 |
| 7 | -16 | -10 | 1.88  | 0.40 |
| 7 | 16  | -9  | 0.33  | 0.44 |
| 7 | -16 | -9  | 0.44  | 0.36 |
| 7 | 16  | -8  | 1.26  | 0.44 |
| 7 | -16 | -8  | 1.94  | 0.36 |
| 7 | 16  | -7  | 0.54  | 0.41 |

|   |     |     |       |       |      |
|---|-----|-----|-------|-------|------|
| 7 | -16 | -7  | 0.65  | 0.33  |      |
| 7 | 16  | -6  | 0.53  | 0.39  |      |
| 7 | -16 | -6  | 0.57  | 0.31  |      |
| 7 | 16  | -5  | 0.65  | 0.33  |      |
| 7 | -16 | -5  | 0.57  | 0.31  |      |
| 7 | 16  | -4  | 1.39  | 0.37  |      |
| 7 | -16 | -4  | 1.08  | 0.31  |      |
| 7 | 16  | -3  | 0.09  | 0.34  |      |
| - | 7   | -16 | 3     | 0.20  | 0.24 |
| 7 | -16 | -3  | -0.40 | 0.28  |      |
| 7 | 16  | -2  | 0.42  | 0.32  |      |
| - | 7   | -16 | 2     | 0.41  | 0.24 |
| 7 | -16 | -2  | 0.28  | 0.28  |      |
| 7 | 16  | -1  | 2.20  | 0.37  |      |
| 7 | -16 | -1  | 2.33  | 0.32  |      |
| - | 7   | -16 | 1     | 2.23  | 0.28 |
| 7 | 16  | 0   | 3.02  | 0.38  |      |
| - | 7   | 16  | 0     | 3.06  | 0.32 |
| - | 7   | -16 | 0     | 3.58  | 0.35 |
| 7 | -16 | 0   | 3.15  | 0.34  |      |
| - | 7   | 16  | -1    | 1.01  | 0.29 |
| - | 7   | -16 | -1    | 1.05  | 0.28 |
| 7 | -16 | 1   | 0.96  | 0.28  |      |
| - | 7   | 16  | -2    | 0.17  | 0.28 |
| 7 | -16 | 2   | -0.12 | 0.31  |      |
| - | 7   | -16 | -2    | -0.01 | 0.28 |
| - | 7   | 16  | -3    | 0.44  | 0.28 |
| - | 7   | -16 | -3    | 0.82  | 0.30 |
| 7 | -16 | 3   | 0.11  | 0.32  |      |
| - | 7   | 16  | -4    | 2.94  | 0.33 |
| - | 7   | -16 | -4    | 3.08  | 0.35 |
| 7 | -16 | 4   | 3.10  | 0.42  |      |
| - | 7   | -16 | -5    | 0.52  | 0.32 |
| 7 | -16 | 5   | 0.31  | 0.38  |      |
| - | 7   | -16 | -6    | 0.42  | 0.35 |
| 7 | -16 | 6   | 0.13  | 0.40  |      |
| 7 | -16 | 7   | 0.66  | 0.44  |      |
| 7 | 17  | -9  | 0.20  | 0.42  |      |
| 7 | -17 | -9  | 0.16  | 0.38  |      |
| 7 | 17  | -8  | 1.08  | 0.46  |      |
| 7 | -17 | -8  | 0.59  | 0.33  |      |
| 7 | 17  | -7  | 2.62  | 0.46  |      |
| 7 | -17 | -7  | 2.53  | 0.38  |      |
| 7 | 17  | -6  | 0.11  | 0.40  |      |
| 7 | -17 | -6  | 0.44  | 0.33  |      |
| 7 | 17  | -5  | 0.24  | 0.38  |      |
| 7 | -17 | -5  | 0.33  | 0.32  |      |
| 7 | 17  | -4  | 0.19  | 0.36  |      |
| 7 | -17 | -4  | 0.19  | 0.31  |      |
| 7 | 17  | -3  | 2.38  | 0.40  |      |
| 7 | -17 | -3  | 2.29  | 0.33  |      |
| 7 | 17  | -2  | 0.58  | 0.35  |      |
| 7 | -17 | -2  | 0.38  | 0.30  |      |
| - | 7   | -17 | 2     | 0.67  | 0.25 |

|   |     |     |       |      |
|---|-----|-----|-------|------|
| 7 | 17  | -1  | 0.57  | 0.34 |
| 7 | -17 | -1  | 1.12  | 0.31 |
| - | 7   | -17 | 1     | 1.04 |
| - | 7   | -17 | 0     | 0.15 |
| 7 | -17 | 0   | 0.09  | 0.28 |
| - | 7   | -17 | -1    | 2.90 |
| 7 | -17 | 1   | 2.57  | 0.33 |
| - | 7   | 17  | -2    | 0.47 |
| - | 7   | -17 | -2    | 0.60 |
| 7 | -17 | 2   | 0.27  | 0.32 |
| - | 7   | 17  | -3    | 0.21 |
| 7 | -17 | 3   | -0.33 | 0.31 |
| - | 7   | -17 | -3    | 0.53 |
| - | 7   | 17  | -4    | 1.57 |
| - | 7   | -17 | -4    | 1.52 |
| - | 7   | -17 | -5    | 0.88 |
| 7 | -17 | 5   | 1.09  | 0.40 |
| 7 | -17 | 6   | 1.53  | 0.46 |
| 7 | 18  | -8  | 0.22  | 0.46 |
| 7 | -18 | -8  | 0.41  | 0.38 |
| 7 | 18  | -7  | 1.49  | 0.45 |
| 7 | -18 | -7  | 1.78  | 0.35 |
| 7 | 18  | -6  | 0.64  | 0.42 |
| 7 | -18 | -6  | 0.99  | 0.35 |
| 7 | 18  | -5  | 0.51  | 0.41 |
| 7 | -18 | -5  | 0.58  | 0.34 |
| 7 | 18  | -4  | 2.18  | 0.41 |
| 7 | -18 | -4  | 2.37  | 0.35 |
| 7 | 18  | -3  | 1.79  | 0.41 |
| 7 | -18 | -3  | 1.59  | 0.32 |
| 7 | 18  | -2  | 0.36  | 0.37 |
| - | 7   | -18 | 2     | 0.72 |
| 7 | -18 | -2  | 0.74  | 0.30 |
| 7 | -18 | -1  | 0.35  | 0.32 |
| - | 7   | -18 | 1     | 0.24 |
| - | 7   | -18 | 0     | 0.34 |
| 7 | -18 | 0   | 0.26  | 0.30 |
| 7 | -18 | 1   | 0.16  | 0.33 |
| - | 7   | -18 | -1    | 0.30 |
| 7 | -18 | 2   | 2.24  | 0.35 |
| - | 7   | -18 | -2    | 2.61 |
| - | 7   | -18 | -3    | 0.30 |
| 7 | -18 | 3   | -0.03 | 0.36 |
| 7 | -18 | 4   | 1.34  | 0.39 |
| - | 7   | -18 | -4    | 1.82 |
| 7 | 19  | -7  | 2.65  | 0.50 |
| 7 | -19 | -7  | 2.77  | 0.41 |
| 7 | 19  | -6  | 0.73  | 0.44 |
| 7 | -19 | -6  | 1.11  | 0.37 |
| 7 | 19  | -5  | 1.13  | 0.42 |
| 7 | -19 | -5  | 1.11  | 0.36 |
| 7 | 19  | -4  | 0.19  | 0.40 |
| 7 | -19 | -4  | 0.30  | 0.31 |
| 7 | 19  | -3  | 0.61  | 0.38 |

|   |     |     |       |       |      |
|---|-----|-----|-------|-------|------|
| 7 | -19 | -3  | 0.48  | 0.32  |      |
| 7 | -19 | -2  | 0.01  | 0.34  |      |
| 7 | -19 | -1  | -0.26 | 0.34  |      |
| - | 7   | -19 | 1     | 0.42  | 0.30 |
| 7 | -19 | 0   | 0.16  | 0.34  |      |
| - | 7   | -19 | 0     | 0.49  | 0.31 |
| - | 7   | -19 | -1    | 1.05  | 0.33 |
| 7 | -19 | 1   | 0.85  | 0.36  |      |
| 7 | -19 | 2   | -0.01 | 0.36  |      |
| - | 7   | -19 | -2    | 0.42  | 0.33 |
| - | 7   | -19 | -3    | 3.41  | 0.39 |
| 7 | -19 | 3   | 3.24  | 0.41  |      |
| 7 | 20  | -6  | 0.13  | 0.47  |      |
| 7 | 20  | -5  | 0.42  | 0.43  |      |
| 7 | -20 | -5  | 0.84  | 0.37  |      |
| 7 | 20  | -4  | 0.25  | 0.41  |      |
| 7 | -20 | -4  | 0.51  | 0.34  |      |
| 7 | -20 | -3  | 0.65  | 0.36  |      |
| 7 | -20 | -2  | -0.15 | 0.35  |      |
| 7 | -20 | -1  | 0.41  | 0.36  |      |
| - | 7   | -20 | 1     | 0.24  | 0.32 |
| - | 7   | -20 | 0     | 1.17  | 0.34 |
| 7 | -20 | 0   | 0.64  | 0.37  |      |
| 7 | -20 | 1   | 0.11  | 0.38  |      |
| - | 7   | -20 | -1    | 0.87  | 0.34 |
| - | 7   | -20 | -2    | 1.68  | 0.37 |
| - | 7   | -21 | 1     | 0.76  | 0.34 |
| - | 7   | -21 | 0     | 0.33  | 0.37 |
| 8 | 0   | -14 | -0.64 | 0.38  |      |
| 8 | 0   | -13 | -1.11 | 0.34  |      |
| 8 | 0   | -12 | 12.64 | 0.64  |      |
| 8 | 0   | -11 | -0.49 | 0.26  |      |
| 8 | 0   | -10 | 6.27  | 0.48  |      |
| 8 | 0   | -10 | 7.37  | 0.49  |      |
| 8 | 0   | -9  | -0.67 | 0.24  |      |
| 8 | 0   | -9  | 0.05  | 0.23  |      |
| 8 | 0   | -8  | 6.55  | 0.43  |      |
| 8 | 0   | -8  | 6.97  | 0.45  |      |
| - | 8   | 0   | 7     | -0.02 | 0.12 |
| 8 | 0   | -7  | 0.03  | 0.19  |      |
| 8 | 0   | -7  | -0.27 | 0.19  |      |
| - | 8   | 0   | 6     | 3.33  | 0.25 |
| 8 | 0   | -6  | 2.80  | 0.31  |      |
| 8 | 0   | -6  | 3.57  | 0.35  |      |
| 8 | 0   | -5  | -0.17 | 0.16  |      |
| 8 | 0   | -5  | 0.15  | 0.18  |      |
| - | 8   | 0   | 5     | 0.11  | 0.13 |
| 8 | 0   | -4  | 16.03 | 0.77  |      |
| 8 | 0   | -4  | 17.07 | 0.63  |      |
| - | 8   | 0   | 4     | 16.41 | 0.66 |
| - | 8   | 0   | 3     | -0.11 | 0.14 |
| 8 | 0   | -3  | -0.06 | 0.20  |      |
| 8 | 0   | -3  | -0.13 | 0.14  |      |
| 8 | 0   | -2  | 24.06 | 1.11  |      |

|   |   |    |     |       |      |
|---|---|----|-----|-------|------|
| - | 8 | 0  | 2   | 25.05 | 0.94 |
|   | 8 | 0  | -2  | 24.39 | 0.88 |
|   | 8 | 0  | -1  | -0.19 | 0.19 |
|   | 8 | 0  | -1  | -0.12 | 0.12 |
| - | 8 | 0  | 1   | -0.18 | 0.16 |
|   | 8 | 0  | 0   | 0.53  | 0.21 |
|   | 8 | 0  | 0   | 0.65  | 0.12 |
| - | 8 | 0  | 0   | 0.32  | 0.14 |
|   | 8 | 0  | 1   | -0.06 | 0.13 |
|   | 8 | 0  | 2   | 19.81 | 0.90 |
| - | 8 | 0  | -3  | -0.04 | 0.21 |
|   | 8 | 0  | 3   | -0.36 | 0.27 |
| - | 8 | 0  | -4  | 0.71  | 0.22 |
|   | 8 | 0  | 4   | 0.32  | 0.30 |
| - | 8 | 0  | -4  | 0.16  | 0.16 |
| - | 8 | 0  | -5  | -0.08 | 0.24 |
|   | 8 | 0  | 5   | -0.03 | 0.31 |
| - | 8 | 0  | -5  | 0.12  | 0.17 |
| - | 8 | 0  | -6  | 0.53  | 0.26 |
| - | 8 | 0  | -6  | 0.45  | 0.18 |
|   | 8 | 0  | 6   | 0.55  | 0.30 |
|   | 8 | 0  | 7   | -0.13 | 0.34 |
| - | 8 | 0  | -7  | -0.11 | 0.21 |
| - | 8 | 0  | -7  | -0.02 | 0.27 |
|   | 8 | 0  | 8   | 7.45  | 0.63 |
| - | 8 | 0  | -8  | 7.27  | 0.56 |
|   | 8 | 0  | 9   | 0.48  | 0.40 |
| - | 8 | 0  | -9  | -0.14 | 0.33 |
|   | 8 | 0  | 10  | 3.06  | 0.48 |
|   | 8 | 0  | 11  | 0.79  | 0.46 |
|   | 8 | 1  | -14 | -0.84 | 0.38 |
|   | 8 | -1 | -14 | -0.81 | 0.39 |
|   | 8 | 1  | -13 | 1.90  | 0.38 |
|   | 8 | -1 | -13 | 2.27  | 0.39 |
|   | 8 | 1  | -12 | -0.47 | 0.31 |
|   | 8 | -1 | -12 | -0.79 | 0.33 |
|   | 8 | 1  | -11 | 1.63  | 0.28 |
|   | 8 | 1  | -11 | 1.66  | 0.31 |
|   | 8 | -1 | -11 | 1.62  | 0.32 |
|   | 8 | 1  | -10 | 1.85  | 0.27 |
|   | 8 | 1  | -10 | 2.15  | 0.28 |
|   | 8 | -1 | -10 | 1.75  | 0.31 |
|   | 8 | 1  | -9  | 23.53 | 0.95 |
|   | 8 | 1  | -9  | 24.50 | 1.12 |
|   | 8 | -1 | -9  | 25.86 | 0.95 |
|   | 8 | -1 | -9  | 24.60 | 1.11 |
|   | 8 | 1  | -8  | 2.46  | 0.33 |
|   | 8 | 1  | -8  | 2.13  | 0.25 |
|   | 8 | -1 | -8  | 2.64  | 0.33 |
|   | 8 | -1 | -8  | 2.27  | 0.27 |
| - | 8 | 1  | 7   | 4.90  | 0.28 |
|   | 8 | 1  | -7  | 4.62  | 0.37 |
|   | 8 | 1  | -7  | 4.09  | 0.34 |
|   | 8 | -1 | -7  | 4.31  | 0.38 |

|   |    |    |       |       |
|---|----|----|-------|-------|
| 8 | -1 | -7 | 4.17  | 0.37  |
| - | 8  | -1 | 7     | 4.58  |
| 8 | 1  | -6 | 0.89  | 0.18  |
| - | 8  | 1  | 6     | 1.26  |
| 8 | 1  | -6 | 1.32  | 0.21  |
| 8 | -1 | -6 | 1.10  | 0.20  |
| - | 8  | -1 | 6     | 0.89  |
| 8 | -1 | -6 | 1.18  | 0.21  |
| - | 8  | 1  | 5     | 25.58 |
| 8 | 1  | -5 | 24.91 | 0.92  |
| 8 | 1  | -5 | 24.44 | 1.12  |
| - | 8  | -1 | 5     | 24.98 |
| 8 | -1 | -5 | 24.54 | 1.11  |
| 8 | -1 | -5 | 26.61 | 0.93  |
| - | 8  | 1  | 4     | 3.27  |
| 8 | 1  | -4 | 2.57  | 0.26  |
| 8 | 1  | -4 | 3.16  | 0.33  |
| 8 | -1 | -4 | 2.89  | 0.28  |
| - | 8  | -1 | 4     | 2.82  |
| 8 | -1 | -4 | 3.56  | 0.31  |
| 8 | 1  | -3 | 12.28 | 0.50  |
| 8 | 1  | -3 | 12.96 | 0.64  |
| - | 8  | 1  | 3     | 12.35 |
| 8 | -1 | -3 | 12.10 | 0.62  |
| 8 | -1 | -3 | 12.41 | 0.50  |
| - | 8  | -1 | 3     | 12.73 |
| - | 8  | 1  | 2     | 17.57 |
| 8 | 1  | -2 | 16.47 | 0.65  |
| 8 | 1  | -2 | 16.96 | 0.82  |
| 8 | -1 | -2 | 18.06 | 0.65  |
| - | 8  | -1 | 2     | 17.75 |
| 8 | -1 | -2 | 18.13 | 0.83  |
| 8 | 1  | -1 | 1.50  | 0.22  |
| 8 | 1  | -1 | 1.26  | 0.12  |
| - | 8  | 1  | 1     | 1.02  |
| 8 | -1 | -1 | 1.14  | 0.21  |
| 8 | -1 | -1 | 1.04  | 0.14  |
| - | 8  | -1 | 1     | 1.11  |
| 8 | 1  | 0  | 6.32  | 0.32  |
| 8 | -1 | 0  | 8.12  | 0.35  |
| 8 | -1 | 0  | 7.30  | 0.44  |
| - | 8  | -1 | 0     | 7.36  |
| 8 | 1  | 1  | 12.43 | 0.47  |
| 8 | -1 | 1  | 11.09 | 0.62  |
| 8 | 1  | 2  | 2.63  | 0.31  |
| - | 8  | 1  | -2    | 3.07  |
| - | 8  | -1 | -2    | 2.92  |
| 8 | -1 | 2  | 2.58  | 0.29  |
| 8 | 1  | 3  | 0.03  | 0.23  |
| - | 8  | 1  | -3    | 0.03  |
| 8 | -1 | 3  | -0.19 | 0.25  |
| - | 8  | -1 | -3    | 0.24  |
| 8 | 1  | 4  | 9.66  | 0.59  |
| - | 8  | 1  | -4    | 10.12 |

|   |    |     |       |       |      |
|---|----|-----|-------|-------|------|
| 8 | -1 | 4   | 10.38 | 0.58  |      |
| - | 8  | -1  | -4    | 10.50 | 0.52 |
| - | 8  | -1  | -4    | 10.01 | 0.43 |
| - | 8  | 1   | -5    | 11.52 | 0.58 |
| 8 | 1  | 5   | 11.01 | 0.64  |      |
| - | 8  | 1   | -5    | 10.79 | 0.47 |
| - | 8  | -1  | -5    | 10.64 | 0.47 |
| 8 | -1 | 5   | 11.70 | 0.67  |      |
| - | 8  | -1  | -5    | 10.97 | 0.53 |
| 8 | 1  | 6   | 1.77  | 0.32  |      |
| - | 8  | 1   | -6    | 1.37  | 0.28 |
| - | 8  | 1   | -6    | 1.39  | 0.21 |
| - | 8  | -1  | -6    | 1.47  | 0.27 |
| 8 | -1 | 6   | 1.69  | 0.35  |      |
| 8 | 1  | 7   | 1.02  | 0.36  |      |
| - | 8  | 1   | -7    | 1.12  | 0.30 |
| - | 8  | 1   | -7    | 1.00  | 0.22 |
| - | 8  | -1  | -7    | 1.13  | 0.29 |
| 8 | -1 | 7   | 1.10  | 0.33  |      |
| 8 | 1  | 8   | 0.98  | 0.38  |      |
| - | 8  | 1   | -8    | 0.79  | 0.32 |
| - | 8  | 1   | -8    | 0.63  | 0.24 |
| 8 | -1 | 8   | 0.69  | 0.38  |      |
| - | 8  | -1  | -8    | 0.43  | 0.31 |
| 8 | 1  | 9   | 5.43  | 0.60  |      |
| - | 8  | -1  | -9    | 5.28  | 0.55 |
| 8 | -1 | 9   | 5.20  | 0.61  |      |
| 8 | 1  | 10  | 1.70  | 0.45  |      |
| 8 | -1 | 10  | 1.18  | 0.45  |      |
| 8 | 1  | 11  | 1.95  | 0.49  |      |
| 8 | -1 | 11  | 1.72  | 0.48  |      |
| 8 | 2  | -14 | 2.40  | 0.42  |      |
| 8 | -2 | -14 | 2.46  | 0.43  |      |
| 8 | 2  | -13 | -0.63 | 0.31  |      |
| 8 | -2 | -13 | -0.91 | 0.36  |      |
| 8 | 2  | -12 | 3.50  | 0.37  |      |
| 8 | 2  | -12 | 3.88  | 0.44  |      |
| 8 | -2 | -12 | 3.55  | 0.37  |      |
| 8 | 2  | -11 | -0.07 | 0.28  |      |
| 8 | 2  | -11 | -0.20 | 0.27  |      |
| 8 | -2 | -11 | -0.66 | 0.30  |      |
| 8 | 2  | -10 | -0.18 | 0.25  |      |
| 8 | 2  | -10 | 0.00  | 0.25  |      |
| 8 | -2 | -10 | -0.15 | 0.27  |      |
| 8 | 2  | -9  | 4.16  | 0.37  |      |
| 8 | 2  | -9  | 4.32  | 0.41  |      |
| 8 | -2 | -9  | 4.08  | 0.36  |      |
| 8 | -2 | -9  | 4.29  | 0.39  |      |
| 8 | 2  | -8  | 7.00  | 0.41  |      |
| 8 | 2  | -8  | 7.22  | 0.49  |      |
| 8 | -2 | -8  | 6.93  | 0.43  |      |
| 8 | -2 | -8  | 7.42  | 0.46  |      |
| 8 | 2  | -7  | 0.01  | 0.18  |      |
| - | 8  | 2   | 7     | -0.02 | 0.14 |

|   |    |    |       |       |
|---|----|----|-------|-------|
| 8 | 2  | -7 | 0.03  | 0.21  |
| 8 | -2 | -7 | -0.41 | 0.21  |
| 8 | -2 | -7 | -0.08 | 0.18  |
| - | 8  | 2  | 6     | 58.47 |
| 8 | 2  | -6 | 55.66 | 2.46  |
| 8 | 2  | -6 | 57.58 | 2.00  |
| - | 8  | -2 | 6     | 57.47 |
| 8 | -2 | -6 | 61.77 | 2.01  |
| 8 | -2 | -6 | 55.31 | 2.45  |
| 8 | 2  | -5 | 0.07  | 0.20  |
| 8 | 2  | -5 | 0.06  | 0.13  |
| - | 8  | 2  | 5     | 0.06  |
| 8 | -2 | -5 | 0.00  | 0.17  |
| - | 8  | -2 | 5     | -0.07 |
| 8 | -2 | -5 | 0.53  | 0.18  |
| 8 | 2  | -4 | 0.74  | 0.22  |
| - | 8  | 2  | 4     | 0.71  |
| 8 | 2  | -4 | 0.44  | 0.13  |
| 8 | -2 | -4 | 0.70  | 0.18  |
| 8 | -2 | -4 | 0.60  | 0.17  |
| - | 8  | -2 | 4     | 0.60  |
| 8 | 2  | -3 | 14.13 | 0.70  |
| 8 | 2  | -3 | 13.50 | 0.55  |
| - | 8  | 2  | 3     | 14.59 |
| 8 | -2 | -3 | 14.44 | 0.57  |
| - | 8  | -2 | 3     | 14.54 |
| 8 | -2 | -3 | 15.38 | 0.69  |
| - | 8  | 2  | 2     | 23.40 |
| 8 | 2  | -2 | 23.18 | 1.06  |
| 8 | -2 | -2 | 23.09 | 1.05  |
| - | 8  | -2 | 2     | 23.84 |
| 8 | -2 | -2 | 23.33 | 0.85  |
| 8 | 2  | -1 | -0.18 | 0.10  |
| 8 | 2  | -1 | -0.17 | 0.18  |
| - | 8  | 2  | 1     | -0.30 |
| 8 | -2 | -1 | -0.12 | 0.13  |
| 8 | -2 | -1 | 0.08  | 0.21  |
| - | 8  | -2 | 1     | -0.02 |
| 8 | 2  | 0  | -0.07 | 0.09  |
| - | 8  | -2 | 0     | -0.04 |
| 8 | -2 | 0  | 0.22  | 0.22  |
| 8 | -2 | 0  | 0.17  | 0.12  |
| 8 | 2  | 2  | 0.63  | 0.23  |
| - | 8  | 2  | -2    | 0.63  |
| 8 | -2 | 2  | 0.42  | 0.24  |
| - | 8  | -2 | -2    | 0.33  |
| 8 | 2  | 3  | 5.32  | 0.41  |
| - | 8  | 2  | -3    | 6.30  |
| 8 | -2 | 3  | 5.08  | 0.42  |
| - | 8  | -2 | -3    | 5.85  |
| 8 | 2  | 4  | 7.81  | 0.55  |
| - | 8  | 2  | -4    | 8.21  |
| - | 8  | -2 | -4    | 8.02  |
| 8 | -2 | 4  | 8.11  | 0.55  |

|   |    |     |       |       |      |
|---|----|-----|-------|-------|------|
| 8 | 2  | 5   | 1.15  | 0.32  |      |
| - | 8  | 2   | -5    | 1.06  | 0.27 |
| - | 8  | 2   | -5    | 0.97  | 0.19 |
| 8 | -2 | 5   | 0.85  | 0.29  |      |
| - | 8  | -2  | -5    | 0.69  | 0.23 |
| 8 | 2  | 6   | 14.94 | 0.81  |      |
| - | 8  | 2   | -6    | 15.40 | 0.72 |
| - | 8  | 2   | -6    | 13.98 | 0.59 |
| 8 | -2 | 6   | 14.17 | 0.76  |      |
| - | 8  | -2  | -6    | 14.40 | 0.69 |
| 8 | 2  | 7   | 0.16  | 0.34  |      |
| - | 8  | 2   | -7    | 0.00  | 0.21 |
| - | 8  | 2   | -7    | -0.23 | 0.29 |
| - | 8  | -2  | -7    | 0.07  | 0.27 |
| 8 | -2 | 7   | 0.31  | 0.34  |      |
| 8 | 2  | 8   | 2.39  | 0.40  |      |
| - | 8  | 2   | -8    | 2.35  | 0.36 |
| - | 8  | 2   | -8    | 2.04  | 0.27 |
| - | 8  | -2  | -8    | 2.21  | 0.33 |
| 8 | -2 | 8   | 2.23  | 0.41  |      |
| 8 | 2  | 9   | 0.86  | 0.39  |      |
| - | 8  | 2   | -9    | 0.03  | 0.27 |
| 8 | -2 | 9   | 0.41  | 0.40  |      |
| - | 8  | -2  | -9    | 0.13  | 0.35 |
| 8 | 2  | 10  | 0.80  | 0.42  |      |
| 8 | -2 | 10  | 0.29  | 0.43  |      |
| 8 | 2  | 11  | 1.18  | 0.45  |      |
| 8 | 3  | -14 | -0.31 | 0.38  |      |
| 8 | -3 | -14 | -0.18 | 0.40  |      |
| 8 | 3  | -13 | -0.29 | 0.34  |      |
| 8 | -3 | -13 | -0.72 | 0.36  |      |
| 8 | 3  | -12 | 0.41  | 0.30  |      |
| 8 | 3  | -12 | 0.61  | 0.31  |      |
| 8 | -3 | -12 | -0.40 | 0.34  |      |
| 8 | 3  | -11 | 2.69  | 0.34  |      |
| 8 | 3  | -11 | 2.43  | 0.32  |      |
| 8 | -3 | -11 | 2.16  | 0.35  |      |
| 8 | 3  | -10 | 0.61  | 0.24  |      |
| 8 | 3  | -10 | 0.52  | 0.28  |      |
| 8 | -3 | -10 | 0.12  | 0.27  |      |
| 8 | 3  | -9  | 9.52  | 0.48  |      |
| 8 | 3  | -9  | 9.13  | 0.57  |      |
| 8 | -3 | -9  | 10.21 | 0.55  |      |
| 8 | 3  | -8  | 3.26  | 0.37  |      |
| - | 8  | 3   | 8     | 3.01  | 0.27 |
| 8 | 3  | -8  | 3.26  | 0.31  |      |
| 8 | -3 | -8  | 2.93  | 0.30  |      |
| 8 | -3 | -8  | 2.60  | 0.30  |      |
| 8 | 3  | -7  | 2.65  | 0.36  |      |
| - | 8  | 3   | 7     | 2.84  | 0.27 |
| 8 | 3  | -7  | 3.14  | 0.30  |      |
| 8 | -3 | -7  | 2.91  | 0.27  |      |
| 8 | -3 | -7  | 2.58  | 0.29  |      |
| - | 8  | 3   | 6     | 19.18 | 0.75 |

|   |    |    |       |       |      |
|---|----|----|-------|-------|------|
| 8 | 3  | -6 | 19.25 | 0.91  |      |
| 8 | 3  | -6 | 18.87 | 0.72  |      |
| 8 | -3 | -6 | 18.11 | 0.87  |      |
| 8 | -3 | -6 | 21.57 | 0.77  |      |
| - | 8  | -3 | 6     | 19.43 | 0.74 |
| - | 8  | 3  | 5     | 17.13 | 0.68 |
| 8 | 3  | -5 | 17.16 | 0.83  |      |
| 8 | 3  | -5 | 16.83 | 0.64  |      |
| - | 8  | -3 | 5     | 16.91 | 0.67 |
| 8 | -3 | -5 | 18.37 | 0.69  |      |
| 8 | -3 | -5 | 16.92 | 0.79  |      |
| 8 | 3  | -4 | 23.05 | 0.87  |      |
| 8 | 3  | -4 | 23.97 | 1.10  |      |
| - | 8  | 3  | 4     | 24.51 | 0.93 |
| 8 | -3 | -4 | 25.25 | 0.90  |      |
| 8 | -3 | -4 | 23.97 | 1.07  |      |
| - | 8  | -3 | 4     | 25.61 | 0.92 |
| - | 8  | 3  | 3     | 2.64  | 0.24 |
| 8 | 3  | -3 | 2.90  | 0.32  |      |
| 8 | -3 | -3 | 2.42  | 0.20  |      |
| - | 8  | -3 | 3     | 2.84  | 0.24 |
| 8 | -3 | -3 | 2.43  | 0.29  |      |
| 8 | 3  | -2 | 0.11  | 0.21  |      |
| - | 8  | 3  | 2     | 0.17  | 0.15 |
| 8 | 3  | -2 | 0.21  | 0.10  |      |
| - | 8  | -3 | 2     | 0.33  | 0.15 |
| 8 | -3 | -2 | 0.33  | 0.20  |      |
| 8 | -3 | -2 | 0.17  | 0.14  |      |
| - | 8  | 3  | 1     | 7.57  | 0.41 |
| 8 | -3 | -1 | 8.01  | 0.37  |      |
| - | 8  | -3 | 1     | 8.00  | 0.38 |
| 8 | -3 | -1 | 8.27  | 0.45  |      |
| 8 | -3 | 0  | 34.67 | 1.51  |      |
| 8 | -3 | 0  | 34.60 | 1.22  |      |
| - | 8  | -3 | 0     | 34.35 | 1.29 |
| 8 | 3  | 1  | 17.01 | 0.77  |      |
| - | 8  | 3  | -1    | 13.50 | 0.64 |
| 8 | -3 | 1  | 16.25 | 0.77  |      |
| 8 | 3  | 2  | 0.59  | 0.25  |      |
| - | 8  | 3  | -2    | 0.64  | 0.22 |
| - | 8  | -3 | -2    | 0.75  | 0.20 |
| 8 | -3 | 2  | 0.51  | 0.24  |      |
| 8 | 3  | 3  | 0.29  | 0.26  |      |
| - | 8  | 3  | -3    | 0.22  | 0.20 |
| - | 8  | -3 | -3    | 0.40  | 0.21 |
| 8 | -3 | 3  | 0.20  | 0.27  |      |
| - | 8  | 3  | -4    | 0.33  | 0.23 |
| 8 | 3  | 4  | 0.55  | 0.25  |      |
| 8 | -3 | 4  | 0.48  | 0.27  |      |
| - | 8  | -3 | -4    | 0.51  | 0.22 |
| - | 8  | 3  | -5    | 13.84 | 0.59 |
| 8 | 3  | 5  | 14.72 | 0.77  |      |
| - | 8  | 3  | -5    | 15.61 | 0.70 |
| - | 8  | -3 | -5    | 14.41 | 0.68 |

|   |    |     |       |       |
|---|----|-----|-------|-------|
| 8 | -3 | 5   | 13.98 | 0.75  |
| - | 8  | 3   | -6    | 0.12  |
| 8 | 3  | 6   | 0.56  | 0.31  |
| - | 8  | 3   | -6    | 0.53  |
| - | 8  | -3  | -6    | 0.18  |
| 8 | -3 | 6   | 0.40  | 0.30  |
| - | 8  | 3   | -7    | 0.46  |
| - | 8  | 3   | -7    | 0.45  |
| 8 | 3  | 7   | 0.78  | 0.31  |
| - | 8  | -3  | -7    | 0.79  |
| 8 | -3 | 7   | 0.69  | 0.32  |
| - | 8  | 3   | -8    | -0.44 |
| - | 8  | 3   | -8    | -0.19 |
| 8 | 3  | 8   | 0.16  | 0.36  |
| 8 | -3 | 8   | 0.01  | 0.37  |
| - | 8  | -3  | -8    | -0.25 |
| 8 | 3  | 9   | 0.25  | 0.38  |
| - | 8  | 3   | -9    | -0.17 |
| 8 | -3 | 9   | 0.40  | 0.40  |
| - | 8  | -3  | -9    | 0.08  |
| - | 8  | 3   | -10   | -0.27 |
| 8 | 3  | 10  | 0.84  | 0.42  |
| 8 | -3 | 10  | 0.72  | 0.44  |
| 8 | 3  | 11  | 2.38  | 0.47  |
| 8 | 4  | -14 | 0.65  | 0.40  |
| 8 | -4 | -14 | 1.35  | 0.38  |
| 8 | 4  | -13 | -0.51 | 0.34  |
| 8 | 4  | -13 | -0.11 | 0.35  |
| 8 | -4 | -13 | -0.52 | 0.36  |
| 8 | 4  | -12 | 13.94 | 0.68  |
| 8 | 4  | -12 | 13.02 | 0.76  |
| 8 | -4 | -12 | 14.36 | 0.72  |
| 8 | 4  | -11 | 6.70  | 0.48  |
| 8 | 4  | -11 | 6.80  | 0.53  |
| 8 | -4 | -11 | 6.89  | 0.50  |
| 8 | 4  | -10 | 3.44  | 0.38  |
| 8 | 4  | -10 | 3.18  | 0.44  |
| 8 | -4 | -10 | 3.33  | 0.35  |
| 8 | 4  | -9  | 2.09  | 0.31  |
| 8 | 4  | -9  | 2.35  | 0.25  |
| 8 | -4 | -9  | 1.91  | 0.28  |
| 8 | 4  | -8  | 1.86  | 0.21  |
| - | 8  | 4   | 8     | 1.68  |
| 8 | 4  | -8  | 1.63  | 0.28  |
| 8 | -4 | -8  | 1.94  | 0.28  |
| 8 | 4  | -7  | 1.19  | 0.18  |
| - | 8  | 4   | 7     | 0.90  |
| 8 | 4  | -7  | 0.87  | 0.26  |
| 8 | -4 | -7  | 0.98  | 0.24  |
| 8 | -4 | -7  | 0.95  | 0.17  |
| 8 | 4  | -6  | 18.47 | 0.71  |
| 8 | 4  | -6  | 18.75 | 0.90  |
| - | 8  | 4   | 6     | 18.36 |
| 8 | -4 | -6  | 20.87 | 0.76  |

|   |   |    |    |       |      |
|---|---|----|----|-------|------|
| - | 8 | -4 | 6  | 18.83 | 0.72 |
|   | 8 | -4 | -6 | 18.17 | 0.85 |
|   | 8 | 4  | -5 | 5.60  | 0.40 |
| - | 8 | 4  | 5  | 5.43  | 0.33 |
|   | 8 | 4  | -5 | 6.09  | 0.30 |
|   | 8 | -4 | -5 | 5.91  | 0.36 |
| - | 8 | -4 | 5  | 5.72  | 0.31 |
|   | 8 | -4 | -5 | 5.53  | 0.34 |
|   | 8 | 4  | -4 | 4.33  | 0.40 |
| - | 8 | 4  | 4  | 3.98  | 0.27 |
|   | 8 | 4  | -4 | 3.69  | 0.23 |
| - | 8 | -4 | 4  | 5.34  | 0.29 |
|   | 8 | -4 | -4 | 3.87  | 0.33 |
|   | 8 | -4 | -4 | 4.35  | 0.33 |
| - | 8 | 4  | 3  | 7.43  | 0.37 |
|   | 8 | 4  | -3 | 6.66  | 0.46 |
|   | 8 | -4 | -3 | 6.49  | 0.37 |
|   | 8 | -4 | -3 | 6.58  | 0.41 |
| - | 8 | -4 | 3  | 7.05  | 0.36 |
| - | 8 | 4  | 2  | 7.33  | 0.36 |
| - | 8 | -4 | 2  | 6.67  | 0.36 |
|   | 8 | -4 | -2 | 7.19  | 0.42 |
|   | 8 | -4 | -2 | 6.57  | 0.36 |
|   | 8 | -4 | -1 | 5.02  | 0.37 |
| - | 8 | -4 | 1  | 4.86  | 0.33 |
|   | 8 | -4 | -1 | 5.32  | 0.31 |
|   | 8 | 4  | 0  | 0.93  | 0.26 |
|   | 8 | -4 | 0  | 1.50  | 0.16 |
|   | 8 | -4 | 0  | 1.34  | 0.24 |
| - | 8 | -4 | 0  | 1.05  | 0.18 |
|   | 8 | 4  | 1  | 28.26 | 1.23 |
| - | 8 | 4  | -1 | 26.19 | 1.03 |
|   | 8 | -4 | 1  | 26.28 | 1.20 |
| - | 8 | -4 | -1 | 25.97 | 1.02 |
| - | 8 | 4  | -2 | 12.21 | 0.59 |
|   | 8 | 4  | 2  | 13.26 | 0.70 |
| - | 8 | -4 | -2 | 12.18 | 0.54 |
|   | 8 | -4 | 2  | 12.44 | 0.67 |
| - | 8 | 4  | -3 | 6.94  | 0.43 |
|   | 8 | 4  | 3  | 7.05  | 0.52 |
|   | 8 | -4 | 3  | 7.36  | 0.47 |
| - | 8 | -4 | -3 | 7.62  | 0.40 |
| - | 8 | 4  | -4 | 8.42  | 0.53 |
|   | 8 | 4  | 4  | 9.65  | 0.59 |
|   | 8 | -4 | 4  | 8.83  | 0.54 |
| - | 8 | -4 | -4 | 9.35  | 0.50 |
| - | 8 | 4  | -5 | 0.32  | 0.19 |
|   | 8 | 4  | 5  | 0.47  | 0.28 |
| - | 8 | 4  | -5 | 0.29  | 0.24 |
| - | 8 | -4 | -5 | 0.09  | 0.22 |
|   | 8 | -4 | 5  | 0.49  | 0.28 |
|   | 8 | 4  | 6  | 1.72  | 0.32 |
| - | 8 | 4  | -6 | 1.28  | 0.30 |
| - | 8 | 4  | -6 | 1.45  | 0.23 |

|   |    |     |       |       |      |
|---|----|-----|-------|-------|------|
| 8 | -4 | 6   | 1.57  | 0.35  |      |
| - | 8  | -4  | -6    | 1.46  | 0.28 |
| 8 | 4  | 7   | 1.47  | 0.33  |      |
| - | 8  | 4   | -7    | 0.87  | 0.24 |
| - | 8  | 4   | -7    | 0.61  | 0.31 |
| - | 8  | -4  | -7    | 0.82  | 0.29 |
| 8 | -4 | 7   | 1.16  | 0.37  |      |
| 8 | 4  | 8   | 0.14  | 0.34  |      |
| - | 8  | 4   | -8    | -0.67 | 0.34 |
| - | 8  | 4   | -8    | 0.15  | 0.25 |
| - | 8  | -4  | -8    | -0.19 | 0.30 |
| 8 | -4 | 8   | 0.24  | 0.38  |      |
| - | 8  | 4   | -9    | 0.38  | 0.28 |
| 8 | 4  | 9   | 0.68  | 0.37  |      |
| 8 | -4 | 9   | 0.72  | 0.40  |      |
| - | 8  | -4  | -9    | 0.84  | 0.34 |
| - | 8  | 4   | -10   | -0.09 | 0.30 |
| 8 | 4  | 10  | 0.87  | 0.41  |      |
| 8 | -4 | 10  | 0.29  | 0.43  |      |
| - | 8  | 4   | -11   | 2.02  | 0.35 |
| 8 | 5  | -14 | 2.73  | 0.42  |      |
| 8 | 5  | -14 | 3.00  | 0.43  |      |
| 8 | -5 | -14 | 3.10  | 0.45  |      |
| 8 | 5  | -13 | 0.33  | 0.34  |      |
| 8 | 5  | -13 | 0.00  | 0.34  |      |
| 8 | -5 | -13 | -0.10 | 0.37  |      |
| 8 | 5  | -12 | 3.11  | 0.40  |      |
| 8 | 5  | -12 | 3.14  | 0.35  |      |
| 8 | -5 | -12 | 2.82  | 0.39  |      |
| 8 | 5  | -11 | 0.29  | 0.31  |      |
| 8 | 5  | -11 | 0.23  | 0.27  |      |
| 8 | -5 | -11 | -0.17 | 0.29  |      |
| 8 | 5  | -10 | 8.03  | 0.57  |      |
| 8 | 5  | -10 | 7.92  | 0.46  |      |
| 8 | -5 | -10 | 8.72  | 0.50  |      |
| 8 | 5  | -9  | 4.80  | 0.36  |      |
| 8 | 5  | -9  | 4.45  | 0.47  |      |
| 8 | -5 | -9  | 5.09  | 0.47  |      |
| - | 8  | 5   | 8     | 8.48  | 0.43 |
| 8 | 5  | -8  | 8.09  | 0.52  |      |
| 8 | 5  | -8  | 8.57  | 0.42  |      |
| 8 | -5 | -8  | 9.18  | 0.48  |      |
| - | 8  | 5   | 7     | 0.08  | 0.17 |
| 8 | 5  | -7  | 0.14  | 0.23  |      |
| 8 | 5  | -7  | 0.67  | 0.16  |      |
| 8 | -5 | -7  | 0.09  | 0.21  |      |
| 8 | 5  | -6  | 0.51  | 0.25  |      |
| - | 8  | 5   | 6     | 0.34  | 0.16 |
| 8 | 5  | -6  | 0.61  | 0.15  |      |
| - | 8  | -5  | 6     | 0.29  | 0.13 |
| 8 | -5 | -6  | 0.56  | 0.17  |      |
| 8 | -5 | -6  | 0.49  | 0.20  |      |
| - | 8  | 5   | 5     | 33.06 | 1.24 |
| 8 | 5  | -5  | 31.77 | 1.47  |      |

|   |    |    |       |       |      |
|---|----|----|-------|-------|------|
| 8 | 5  | -5 | 32.97 | 1.17  |      |
| 8 | -5 | -5 | 32.78 | 1.43  |      |
| - | 8  | -5 | 5     | 33.92 | 1.22 |
| 8 | -5 | -5 | 35.52 | 1.21  |      |
| 8 | 5  | -4 | 2.66  | 0.34  |      |
| - | 8  | 5  | 4     | 2.68  | 0.27 |
| 8 | -5 | -4 | 2.21  | 0.22  |      |
| 8 | -5 | -4 | 2.66  | 0.28  |      |
| - | 8  | -5 | 4     | 2.64  | 0.23 |
| - | 8  | 5  | 3     | 17.93 | 0.69 |
| 8 | -5 | -3 | 16.64 | 0.80  |      |
| 8 | -5 | -3 | 17.30 | 0.66  |      |
| - | 8  | -5 | 3     | 17.71 | 0.68 |
| - | 8  | 5  | 2     | 1.41  | 0.19 |
| - | 8  | -5 | 2     | 1.27  | 0.17 |
| 8 | -5 | -2 | 1.37  | 0.21  |      |
| 8 | -5 | -2 | 1.29  | 0.17  |      |
| 8 | 5  | -1 | 0.47  | 0.23  |      |
| - | 8  | -5 | 1     | 0.82  | 0.16 |
| 8 | -5 | -1 | 0.92  | 0.21  |      |
| 8 | -5 | -1 | 0.82  | 0.15  |      |
| 8 | 5  | 0  | 57.72 | 2.53  |      |
| - | 8  | -5 | 0     | 59.16 | 2.14 |
| 8 | -5 | 0  | 60.15 | 2.04  |      |
| 8 | -5 | 0  | 58.80 | 2.52  |      |
| - | 8  | 5  | -1    | 17.83 | 0.76 |
| 8 | 5  | 1  | 19.32 | 0.93  |      |
| - | 8  | -5 | -1    | 19.27 | 0.75 |
| 8 | -5 | 1  | 18.23 | 0.88  |      |
| - | 8  | 5  | -2    | 1.11  | 0.21 |
| 8 | 5  | 2  | 1.28  | 0.26  |      |
| 8 | -5 | 2  | 1.18  | 0.27  |      |
| - | 8  | -5 | -2    | 1.03  | 0.21 |
| - | 8  | 5  | -3    | -0.21 | 0.22 |
| 8 | 5  | 3  | 0.07  | 0.25  |      |
| - | 8  | -5 | -3    | 0.05  | 0.19 |
| 8 | -5 | 3  | 0.41  | 0.25  |      |
| 8 | 5  | 4  | 0.39  | 0.25  |      |
| - | 8  | 5  | -4    | 0.15  | 0.22 |
| - | 8  | -5 | -4    | 0.28  | 0.23 |
| 8 | -5 | 4  | -0.04 | 0.29  |      |
| - | 8  | 5  | -5    | -0.17 | 0.27 |
| 8 | 5  | 5  | 0.44  | 0.29  |      |
| - | 8  | -5 | -5    | 0.17  | 0.24 |
| 8 | -5 | 5  | 0.27  | 0.31  |      |
| - | 8  | 5  | -6    | -0.25 | 0.28 |
| - | 8  | 5  | -6    | -0.07 | 0.22 |
| 8 | 5  | 6  | 0.23  | 0.30  |      |
| - | 8  | -5 | -6    | 0.27  | 0.26 |
| 8 | -5 | 6  | 0.43  | 0.30  |      |
| - | 8  | 5  | -7    | 0.77  | 0.25 |
| 8 | 5  | 7  | 1.00  | 0.32  |      |
| - | 8  | 5  | -7    | 0.18  | 0.32 |
| 8 | -5 | 7  | 0.75  | 0.36  |      |

|   |   |    |     |       |      |
|---|---|----|-----|-------|------|
| - | 8 | -5 | -7  | 0.83  | 0.29 |
| - | 8 | 5  | -8  | -0.14 | 0.26 |
|   | 8 | 5  | 8   | 0.43  | 0.33 |
|   | 8 | -5 | 8   | 0.38  | 0.38 |
| - | 8 | -5 | -8  | 0.21  | 0.31 |
| - | 8 | 5  | -9  | -0.09 | 0.28 |
|   | 8 | 5  | 9   | 0.34  | 0.35 |
|   | 8 | -5 | 9   | 0.56  | 0.41 |
| - | 8 | -5 | -9  | 0.45  | 0.34 |
| - | 8 | 5  | -10 | 1.16  | 0.32 |
| - | 8 | -5 | -10 | 1.16  | 0.39 |
|   | 8 | -5 | 10  | 0.94  | 0.45 |
| - | 8 | 5  | -11 | 0.07  | 0.34 |
|   | 8 | 6  | -14 | -0.17 | 0.37 |
|   | 8 | 6  | -14 | -0.37 | 0.37 |
|   | 8 | -6 | -14 | -0.97 | 0.39 |
|   | 8 | 6  | -13 | -0.09 | 0.34 |
|   | 8 | 6  | -13 | 0.08  | 0.36 |
|   | 8 | -6 | -13 | -0.34 | 0.37 |
|   | 8 | 6  | -12 | 0.14  | 0.32 |
|   | 8 | 6  | -12 | 0.38  | 0.35 |
|   | 8 | -6 | -12 | -0.10 | 0.35 |
|   | 8 | 6  | -11 | 1.95  | 0.36 |
|   | 8 | 6  | -11 | 2.01  | 0.30 |
|   | 8 | -6 | -11 | 1.80  | 0.36 |
|   | 8 | 6  | -10 | 0.14  | 0.25 |
|   | 8 | 6  | -10 | 0.01  | 0.32 |
|   | 8 | -6 | -10 | -0.10 | 0.30 |
|   | 8 | 6  | -9  | 5.27  | 0.37 |
|   | 8 | 6  | -9  | 5.00  | 0.49 |
|   | 8 | -6 | -9  | 5.20  | 0.47 |
| - | 8 | 6  | 8   | 0.69  | 0.19 |
|   | 8 | 6  | -8  | 0.87  | 0.30 |
|   | 8 | 6  | -8  | 1.26  | 0.20 |
|   | 8 | -6 | -8  | 0.76  | 0.25 |
| - | 8 | 6  | 7   | 15.11 | 0.64 |
|   | 8 | 6  | -7  | 15.28 | 0.60 |
|   | 8 | 6  | -7  | 15.47 | 0.80 |
|   | 8 | -6 | -7  | 15.82 | 0.65 |
|   | 8 | 6  | -6  | 0.48  | 0.26 |
| - | 8 | 6  | 6   | 0.61  | 0.17 |
|   | 8 | -6 | -6  | 0.68  | 0.21 |
| - | 8 | 6  | 5   | 2.81  | 0.29 |
|   | 8 | 6  | -5  | 3.36  | 0.41 |
| - | 8 | -6 | 5   | 3.03  | 0.25 |
|   | 8 | -6 | -5  | 3.53  | 0.28 |
|   | 8 | -6 | -5  | 2.91  | 0.31 |
|   | 8 | 6  | -4  | 3.04  | 0.40 |
| - | 8 | 6  | 4   | 3.23  | 0.29 |
|   | 8 | -6 | -4  | 2.90  | 0.32 |
| - | 8 | -6 | 4   | 3.24  | 0.27 |
|   | 8 | -6 | -4  | 3.29  | 0.28 |
| - | 8 | 6  | 3   | 16.31 | 0.65 |
|   | 8 | -6 | -3  | 16.04 | 0.75 |

|   |    |    |       |       |      |
|---|----|----|-------|-------|------|
| 8 | -6 | -3 | 16.08 | 0.65  |      |
| - | 8  | -6 | 3     | 16.30 | 0.65 |
| - | 8  | 6  | 2     | 7.65  | 0.38 |
| 8 | 6  | -2 | 6.24  | 0.45  |      |
| 8 | -6 | -2 | 7.35  | 0.42  |      |
| 8 | -6 | -2 | 6.96  | 0.39  |      |
| - | 8  | -6 | 2     | 7.12  | 0.37 |
| 8 | 6  | -1 | 44.27 | 1.90  |      |
| - | 8  | -6 | 1     | 43.34 | 1.58 |
| 8 | -6 | -1 | 43.09 | 1.52  |      |
| 8 | -6 | -1 | 42.58 | 1.86  |      |
| 8 | 6  | 0  | 2.65  | 0.34  |      |
| - | 8  | 6  | 0     | 3.36  | 0.30 |
| 8 | -6 | 0  | 2.80  | 0.36  |      |
| - | 8  | -6 | 0     | 3.34  | 0.27 |
| 8 | -6 | 0  | 3.41  | 0.30  |      |
| 8 | 6  | 1  | 1.11  | 0.30  |      |
| - | 8  | 6  | -1    | 1.58  | 0.23 |
| 8 | -6 | 1  | 1.62  | 0.27  |      |
| - | 8  | -6 | -1    | 1.58  | 0.21 |
| - | 8  | 6  | -2    | 0.02  | 0.19 |
| 8 | 6  | 2  | -0.45 | 0.27  |      |
| - | 8  | -6 | -2    | 0.17  | 0.18 |
| 8 | -6 | 2  | -0.06 | 0.25  |      |
| - | 8  | 6  | -3    | 1.75  | 0.26 |
| 8 | 6  | 3  | 2.02  | 0.29  |      |
| - | 8  | -6 | -3    | 1.92  | 0.22 |
| 8 | -6 | 3  | 1.81  | 0.30  |      |
| - | 8  | 6  | -4    | -0.47 | 0.25 |
| 8 | 6  | 4  | -0.13 | 0.26  |      |
| 8 | -6 | 4  | -0.19 | 0.26  |      |
| - | 8  | -6 | -4    | 0.17  | 0.23 |
| - | 8  | 6  | -5    | 1.55  | 0.29 |
| 8 | 6  | 5  | 2.10  | 0.32  |      |
| 8 | -6 | 5  | 1.55  | 0.34  |      |
| - | 8  | -6 | -5    | 1.46  | 0.24 |
| - | 8  | 6  | -6    | 0.16  | 0.28 |
| 8 | 6  | 6  | 0.89  | 0.31  |      |
| - | 8  | -6 | -6    | 1.06  | 0.28 |
| 8 | -6 | 6  | 1.06  | 0.34  |      |
| - | 8  | 6  | -7    | 3.93  | 0.38 |
| - | 8  | 6  | -7    | 4.50  | 0.40 |
| 8 | 6  | 7  | 5.34  | 0.52  |      |
| 8 | -6 | 7  | 4.76  | 0.52  |      |
| - | 8  | -6 | -7    | 4.85  | 0.46 |
| - | 8  | 6  | -8    | 3.91  | 0.42 |
| 8 | 6  | 8  | 4.79  | 0.53  |      |
| - | 8  | -6 | -8    | 4.07  | 0.49 |
| 8 | -6 | 8  | 4.31  | 0.48  |      |
| - | 8  | 6  | -9    | 0.08  | 0.29 |
| 8 | 6  | 9  | 0.62  | 0.38  |      |
| 8 | -6 | 9  | 0.36  | 0.41  |      |
| - | 8  | -6 | -9    | 0.25  | 0.34 |
| - | 8  | 6  | -10   | 0.66  | 0.33 |

|   |    |     |       |       |
|---|----|-----|-------|-------|
| 8 | -6 | 10  | 0.82  | 0.44  |
| - | 8  | -6  | -10   | 0.74  |
| 8 | 7  | -14 | 1.67  | 0.40  |
| 8 | 7  | -14 | 1.62  | 0.42  |
| 8 | 7  | -13 | 1.62  | 0.41  |
| 8 | 7  | -13 | 1.40  | 0.36  |
| 8 | -7 | -13 | 1.07  | 0.39  |
| 8 | 7  | -12 | 0.64  | 0.30  |
| 8 | 7  | -12 | 0.84  | 0.37  |
| 8 | -7 | -12 | 0.43  | 0.33  |
| 8 | 7  | -11 | 0.14  | 0.35  |
| 8 | 7  | -11 | 0.35  | 0.27  |
| 8 | -7 | -11 | -0.19 | 0.33  |
| 8 | 7  | -10 | 3.71  | 0.51  |
| 8 | 7  | -10 | 3.99  | 0.38  |
| 8 | -7 | -10 | 4.57  | 0.42  |
| 8 | 7  | -9  | 12.94 | 0.76  |
| 8 | 7  | -9  | 13.29 | 0.59  |
| 8 | -7 | -9  | 14.75 | 0.66  |
| 8 | 7  | -8  | 4.63  | 0.44  |
| 8 | -7 | -8  | 5.21  | 0.45  |
| 8 | 7  | -7  | 0.97  | 0.27  |
| - | 8  | 7   | 7     | 0.68  |
| 8 | -7 | -7  | 0.72  | 0.25  |
| 8 | 7  | -6  | 0.79  | 0.26  |
| - | 8  | 7   | 6     | 0.95  |
| 8 | -7 | -6  | 1.07  | 0.22  |
| 8 | 7  | -5  | 1.14  | 0.28  |
| - | 8  | 7   | 5     | 1.09  |
| 8 | -7 | -5  | 1.36  | 0.23  |
| - | 8  | -7  | 5     | 1.26  |
| - | 8  | 7   | 4     | 8.06  |
| 8 | 7  | -4  | 8.29  | 0.55  |
| - | 8  | -7  | 4     | 8.05  |
| 8 | -7 | -4  | 8.21  | 0.44  |
| 8 | -7 | -4  | 7.22  | 0.40  |
| 8 | 7  | -3  | 0.16  | 0.24  |
| - | 8  | 7   | 3     | -0.05 |
| 8 | -7 | -3  | -0.01 | 0.19  |
| - | 8  | -7  | 3     | -0.06 |
| 8 | -7 | -3  | 0.20  | 0.18  |
| 8 | 7  | -2  | 4.76  | 0.42  |
| - | 8  | 7   | 2     | 4.59  |
| 8 | -7 | -2  | 4.11  | 0.33  |
| 8 | -7 | -2  | 4.33  | 0.31  |
| - | 8  | -7  | 2     | 4.12  |
| 8 | 7  | -1  | 21.69 | 1.01  |
| - | 8  | 7   | 1     | 19.94 |
| 8 | -7 | -1  | 20.68 | 0.78  |
| 8 | -7 | -1  | 20.16 | 0.95  |
| - | 8  | -7  | 1     | 20.11 |
| 8 | 7  | 0   | 0.34  | 0.29  |
| - | 8  | 7   | 0     | 0.88  |
| - | 8  | -7  | 0     | 0.87  |

|   |    |     |       |       |      |
|---|----|-----|-------|-------|------|
| 8 | -7 | 0   | 1.13  | 0.17  |      |
| 8 | -7 | 0   | 0.69  | 0.24  |      |
| - | 8  | 7   | -1    | 7.83  | 0.42 |
| 8 | 7  | 1   | 5.77  | 0.56  |      |
| 8 | -7 | 1   | 7.25  | 0.47  |      |
| - | 8  | -7  | -1    | 7.67  | 0.41 |
| 8 | 7  | 2   | 1.18  | 0.31  |      |
| - | 8  | 7   | -2    | 1.95  | 0.25 |
| - | 8  | -7  | -2    | 1.74  | 0.23 |
| 8 | -7 | 2   | 1.77  | 0.28  |      |
| - | 8  | 7   | -3    | -0.17 | 0.23 |
| 8 | 7  | 3   | -0.53 | 0.29  |      |
| - | 8  | -7  | -3    | 0.33  | 0.20 |
| 8 | -7 | 3   | 0.48  | 0.28  |      |
| - | 8  | 7   | -4    | 16.55 | 0.74 |
| 8 | 7  | 4   | 18.81 | 0.90  |      |
| - | 8  | -7  | -4    | 17.50 | 0.75 |
| 8 | -7 | 4   | 16.67 | 0.84  |      |
| 8 | 7  | 5   | -0.11 | 0.30  |      |
| - | 8  | 7   | -5    | -0.44 | 0.25 |
| 8 | -7 | 5   | 0.01  | 0.29  |      |
| - | 8  | -7  | -5    | 0.08  | 0.25 |
| - | 8  | 7   | -6    | -0.11 | 0.27 |
| 8 | 7  | 6   | 0.54  | 0.32  |      |
| - | 8  | -7  | -6    | 0.37  | 0.25 |
| 8 | -7 | 6   | 0.75  | 0.35  |      |
| - | 8  | 7   | -7    | 0.23  | 0.26 |
| 8 | 7  | 7   | -0.04 | 0.32  |      |
| - | 8  | 7   | -7    | -0.86 | 0.28 |
| - | 8  | -7  | -7    | -0.03 | 0.29 |
| 8 | -7 | 7   | 0.04  | 0.36  |      |
| - | 8  | 7   | -8    | 0.50  | 0.29 |
| 8 | 7  | 8   | 1.02  | 0.35  |      |
| - | 8  | -7  | -8    | 1.26  | 0.30 |
| 8 | -7 | 8   | 1.53  | 0.41  |      |
| - | 8  | 7   | -9    | 0.00  | 0.31 |
| 8 | -7 | 9   | 0.23  | 0.42  |      |
| - | 8  | -7  | -9    | 0.12  | 0.33 |
| - | 8  | 7   | -10   | 1.10  | 0.35 |
| - | 8  | -7  | -10   | 1.53  | 0.38 |
| 8 | 8  | -14 | 0.08  | 0.42  |      |
| 8 | 8  | -13 | 3.46  | 0.46  |      |
| 8 | -8 | -13 | 3.51  | 0.40  |      |
| 8 | 8  | -12 | 0.52  | 0.39  |      |
| 8 | -8 | -12 | 0.10  | 0.36  |      |
| 8 | 8  | -11 | 11.59 | 0.75  |      |
| 8 | -8 | -11 | 13.14 | 0.67  |      |
| 8 | 8  | -10 | -0.04 | 0.35  |      |
| 8 | -8 | -10 | -0.05 | 0.29  |      |
| 8 | 8  | -9  | 0.99  | 0.31  |      |
| 8 | -8 | -9  | 0.90  | 0.30  |      |
| 8 | 8  | -8  | 5.01  | 0.47  |      |
| 8 | -8 | -8  | 5.58  | 0.41  |      |
| - | 8  | 8   | 7     | 2.23  | 0.23 |

|   |    |    |       |       |
|---|----|----|-------|-------|
| 8 | 8  | -7 | 2.42  | 0.33  |
| 8 | -8 | -7 | 2.37  | 0.26  |
| 8 | 8  | -6 | 0.61  | 0.30  |
| - | 8  | 8  | 6     | 0.40  |
| 8 | -8 | -6 | 0.39  | 0.22  |
| - | 8  | 8  | 5     | 0.71  |
| 8 | 8  | -5 | 0.80  | 0.29  |
| - | 8  | -8 | 5     | 0.71  |
| 8 | -8 | -5 | 0.82  | 0.21  |
| - | 8  | 8  | 4     | 0.09  |
| 8 | 8  | -4 | -0.03 | 0.25  |
| - | 8  | -8 | 4     | 0.14  |
| 8 | -8 | -4 | -0.04 | 0.21  |
| - | 8  | 8  | 3     | 6.98  |
| 8 | 8  | -3 | 7.07  | 0.53  |
| 8 | -8 | -3 | 6.27  | 0.41  |
| 8 | -8 | -3 | 6.37  | 0.40  |
| - | 8  | -8 | 3     | 6.86  |
| 8 | 8  | -2 | 0.06  | 0.26  |
| - | 8  | 8  | 2     | -0.07 |
| - | 8  | -8 | 2     | 0.00  |
| 8 | -8 | -2 | 0.11  | 0.20  |
| 8 | -8 | -2 | 0.12  | 0.20  |
| 8 | 8  | -1 | 1.70  | 0.31  |
| - | 8  | 8  | 1     | 1.45  |
| 8 | -8 | -1 | 1.46  | 0.24  |
| - | 8  | -8 | 1     | 1.29  |
| 8 | -8 | -1 | 1.51  | 0.19  |
| - | 8  | 8  | 0     | 0.47  |
| 8 | 8  | 0  | 0.21  | 0.29  |
| - | 8  | -8 | 0     | 0.23  |
| 8 | -8 | 0  | 0.15  | 0.23  |
| 8 | -8 | 0  | 0.41  | 0.17  |
| 8 | 8  | 1  | 0.40  | 0.32  |
| - | 8  | 8  | -1    | 1.19  |
| 8 | -8 | 1  | 1.10  | 0.25  |
| - | 8  | -8 | -1    | 1.02  |
| - | 8  | 8  | -2    | 0.16  |
| - | 8  | -8 | -2    | 0.05  |
| 8 | -8 | 2  | 0.10  | 0.26  |
| - | 8  | 8  | -3    | 22.64 |
| 8 | 8  | 3  | 23.93 | 1.14  |
| - | 8  | -8 | -3    | 23.50 |
| 8 | -8 | 3  | 23.41 | 1.08  |
| 8 | 8  | 4  | 0.76  | 0.32  |
| - | 8  | 8  | -4    | 0.59  |
| - | 8  | -8 | -4    | 1.03  |
| 8 | -8 | 4  | 1.17  | 0.31  |
| - | 8  | 8  | -5    | 6.53  |
| 8 | 8  | 5  | 7.04  | 0.57  |
| 8 | -8 | 5  | 6.79  | 0.54  |
| - | 8  | -8 | -5    | 6.92  |
| - | 8  | 8  | -6    | -0.20 |
| 8 | 8  | 6  | 0.11  | 0.32  |

|   |   |    |     |       |      |
|---|---|----|-----|-------|------|
| - | 8 | -8 | -6  | 0.07  | 0.25 |
|   | 8 | -8 | 6   | 0.40  | 0.35 |
| - | 8 | 8  | -7  | -0.51 | 0.29 |
|   | 8 | 8  | 7   | 0.01  | 0.33 |
|   | 8 | -8 | 7   | 0.25  | 0.37 |
| - | 8 | -8 | -7  | 0.21  | 0.29 |
| - | 8 | 8  | -8  | -0.09 | 0.29 |
|   | 8 | -8 | 8   | 0.58  | 0.41 |
| - | 8 | -8 | -8  | 0.09  | 0.31 |
| - | 8 | 8  | -9  | 0.10  | 0.32 |
| - | 8 | -8 | -9  | 0.85  | 0.35 |
|   | 8 | -8 | 9   | 0.78  | 0.43 |
| - | 8 | 8  | -10 | 0.22  | 0.32 |
| - | 8 | -8 | -10 | 0.57  | 0.40 |
|   | 8 | 9  | -13 | 0.89  | 0.42 |
|   | 8 | -9 | -13 | 0.28  | 0.40 |
|   | 8 | 9  | -12 | 1.34  | 0.42 |
|   | 8 | -9 | -12 | 0.97  | 0.35 |
|   | 8 | 9  | -11 | -0.16 | 0.38 |
|   | 8 | -9 | -11 | 0.01  | 0.31 |
|   | 8 | 9  | -10 | 0.49  | 0.37 |
|   | 8 | -9 | -10 | 0.39  | 0.32 |
|   | 8 | 9  | -9  | 3.89  | 0.46 |
|   | 8 | -9 | -9  | 4.07  | 0.47 |
|   | 8 | 9  | -8  | 6.28  | 0.56 |
|   | 8 | -9 | -8  | 5.92  | 0.47 |
|   | 8 | 9  | -7  | 0.40  | 0.31 |
| - | 8 | 9  | 7   | 0.00  | 0.20 |
|   | 8 | -9 | -7  | 0.16  | 0.26 |
|   | 8 | 9  | -6  | 1.51  | 0.32 |
| - | 8 | 9  | 6   | 1.31  | 0.22 |
|   | 8 | -9 | -6  | 1.43  | 0.24 |
|   | 8 | 9  | -5  | 5.38  | 0.50 |
| - | 8 | 9  | 5   | 5.45  | 0.37 |
| - | 8 | -9 | 5   | 4.93  | 0.31 |
|   | 8 | -9 | -5  | 5.00  | 0.37 |
|   | 8 | 9  | -4  | 1.28  | 0.31 |
| - | 8 | 9  | 4   | 0.73  | 0.19 |
| - | 8 | -9 | 4   | 0.96  | 0.16 |
|   | 8 | -9 | -4  | 0.63  | 0.21 |
| - | 8 | 9  | 3   | 0.06  | 0.20 |
|   | 8 | 9  | -3  | 0.32  | 0.29 |
|   | 8 | -9 | -3  | -0.10 | 0.21 |
| - | 8 | -9 | 3   | 0.17  | 0.16 |
| - | 8 | 9  | 2   | 1.99  | 0.23 |
|   | 8 | 9  | -2  | 1.79  | 0.33 |
| - | 8 | -9 | 2   | 1.61  | 0.19 |
|   | 8 | -9 | -2  | 1.58  | 0.22 |
|   | 8 | -9 | -2  | 1.81  | 0.23 |
|   | 8 | 9  | -1  | 10.07 | 0.61 |
| - | 8 | 9  | 1   | 10.25 | 0.50 |
|   | 8 | -9 | -1  | 8.94  | 0.52 |
| - | 8 | -9 | 1   | 9.77  | 0.46 |
|   | 8 | -9 | -1  | 9.93  | 0.48 |

|   |   |     |     |       |      |
|---|---|-----|-----|-------|------|
| - | 8 | 9   | 0   | 36.75 | 1.34 |
|   | 8 | 9   | 0   | 35.05 | 1.58 |
|   | 8 | -9  | 0   | 34.16 | 1.53 |
| - | 8 | -9  | 0   | 35.45 | 1.31 |
|   | 8 | -9  | 0   | 34.21 | 1.26 |
| - | 8 | 9   | -1  | 0.15  | 0.21 |
|   | 8 | 9   | 1   | -0.16 | 0.30 |
| - | 8 | -9  | -1  | 0.35  | 0.21 |
|   | 8 | -9  | 1   | 0.23  | 0.21 |
|   | 8 | -9  | 1   | 0.23  | 0.25 |
| - | 8 | 9   | -2  | 11.38 | 0.58 |
|   | 8 | -9  | 2   | 11.40 | 0.62 |
| - | 8 | -9  | -2  | 10.97 | 0.55 |
| - | 8 | 9   | -3  | 0.44  | 0.23 |
|   | 8 | 9   | 3   | -0.41 | 0.31 |
| - | 8 | -9  | -3  | 0.73  | 0.24 |
|   | 8 | -9  | 3   | 0.18  | 0.28 |
|   | 8 | 9   | 4   | 1.40  | 0.36 |
| - | 8 | 9   | -4  | 1.94  | 0.28 |
|   | 8 | -9  | 4   | 1.89  | 0.33 |
| - | 8 | -9  | -4  | 1.81  | 0.25 |
| - | 8 | 9   | -5  | 0.80  | 0.27 |
|   | 8 | 9   | 5   | -0.15 | 0.34 |
| - | 8 | -9  | -5  | 0.27  | 0.26 |
|   | 8 | -9  | 5   | 0.33  | 0.33 |
| - | 8 | 9   | -6  | 0.15  | 0.28 |
|   | 8 | 9   | 6   | -0.12 | 0.35 |
| - | 8 | -9  | -6  | 0.34  | 0.26 |
|   | 8 | -9  | 6   | 0.50  | 0.36 |
|   | 8 | -9  | 7   | 1.54  | 0.40 |
| - | 8 | -9  | -7  | 1.20  | 0.32 |
| - | 8 | -9  | -8  | 0.01  | 0.32 |
|   | 8 | -9  | 8   | 0.66  | 0.38 |
| - | 8 | -9  | -9  | -0.10 | 0.36 |
|   | 8 | -9  | 9   | 0.32  | 0.40 |
| - | 8 | -9  | -10 | 1.91  | 0.41 |
|   | 8 | 10  | -13 | 0.19  | 0.44 |
|   | 8 | 10  | -12 | -0.34 | 0.41 |
|   | 8 | -10 | -12 | -0.31 | 0.37 |
|   | 8 | 10  | -11 | 1.16  | 0.42 |
|   | 8 | -10 | -11 | 1.27  | 0.35 |
|   | 8 | 10  | -10 | 0.20  | 0.35 |
|   | 8 | -10 | -10 | 0.35  | 0.32 |
|   | 8 | 10  | -9  | 4.10  | 0.50 |
|   | 8 | -10 | -9  | 5.36  | 0.48 |
|   | 8 | 10  | -8  | 0.65  | 0.33 |
|   | 8 | -10 | -8  | 0.60  | 0.29 |
|   | 8 | 10  | -7  | 9.90  | 0.67 |
|   | 8 | -10 | -7  | 10.63 | 0.56 |
|   | 8 | 10  | -6  | 1.93  | 0.34 |
| - | 8 | 10  | 6   | 1.63  | 0.23 |
|   | 8 | -10 | -6  | 1.75  | 0.27 |
|   | 8 | 10  | -5  | 0.87  | 0.32 |
| - | 8 | 10  | 5   | 0.84  | 0.20 |

|   |     |     |       |       |      |
|---|-----|-----|-------|-------|------|
| 8 | -10 | -5  | 0.61  | 0.23  |      |
| - | 8   | 10  | 4     | 1.35  | 0.21 |
| 8 | 10  | -4  | 1.30  | 0.32  |      |
| 8 | -10 | -4  | 1.12  | 0.22  |      |
| - | 8   | -10 | 4     | 1.34  | 0.18 |
| - | 8   | 10  | 3     | 6.85  | 0.39 |
| 8 | 10  | -3  | 6.91  | 0.55  |      |
| - | 8   | -10 | 3     | 6.95  | 0.37 |
| 8 | -10 | -3  | 6.42  | 0.43  |      |
| 8 | 10  | -2  | 0.40  | 0.32  |      |
| - | 8   | 10  | 2     | 0.60  | 0.22 |
| 8 | -10 | -2  | 0.17  | 0.22  |      |
| 8 | -10 | -2  | 0.54  | 0.20  |      |
| - | 8   | -10 | 2     | 0.35  | 0.18 |
| 8 | 10  | -1  | 1.18  | 0.34  |      |
| - | 8   | 10  | 1     | 1.53  | 0.24 |
| 8 | -10 | -1  | 1.35  | 0.25  |      |
| 8 | -10 | -1  | 1.10  | 0.21  |      |
| - | 8   | -10 | 1     | 1.49  | 0.21 |
| 8 | 10  | 0   | 3.43  | 0.39  |      |
| - | 8   | 10  | 0     | 4.26  | 0.39 |
| - | 8   | -10 | 0     | 3.60  | 0.30 |
| 8 | -10 | 0   | 3.63  | 0.39  |      |
| 8 | -10 | 0   | 3.81  | 0.36  |      |
| 8 | 10  | 1   | 0.25  | 0.32  |      |
| - | 8   | 10  | -1    | 1.22  | 0.25 |
| - | 8   | -10 | -1    | 0.93  | 0.23 |
| 8 | -10 | 1   | 0.74  | 0.27  |      |
| 8 | -10 | 1   | 0.87  | 0.23  |      |
| 8 | 10  | 2   | 0.74  | 0.33  |      |
| - | 8   | 10  | -2    | 1.66  | 0.27 |
| 8 | -10 | 2   | 1.68  | 0.30  |      |
| - | 8   | -10 | -2    | 1.57  | 0.25 |
| - | 8   | 10  | -3    | 0.89  | 0.24 |
| - | 8   | -10 | -3    | 1.03  | 0.23 |
| 8 | -10 | 3   | 0.98  | 0.30  |      |
| 8 | 10  | 4   | -0.45 | 0.33  |      |
| - | 8   | 10  | -4    | 0.52  | 0.26 |
| 8 | -10 | 4   | 0.60  | 0.32  |      |
| - | 8   | -10 | -4    | 0.87  | 0.26 |
| 8 | 10  | 5   | -0.61 | 0.32  |      |
| - | 8   | 10  | -5    | 0.48  | 0.27 |
| 8 | -10 | 5   | 0.10  | 0.31  |      |
| - | 8   | -10 | -5    | -0.01 | 0.24 |
| 8 | 10  | 6   | -0.56 | 0.33  |      |
| - | 8   | 10  | -6    | -0.08 | 0.27 |
| 8 | -10 | 6   | 0.26  | 0.36  |      |
| - | 8   | -10 | -6    | 0.21  | 0.29 |
| 8 | -10 | 7   | 2.09  | 0.39  |      |
| - | 8   | -10 | -7    | 2.11  | 0.34 |
| 8 | -10 | 8   | 1.09  | 0.44  |      |
| - | 8   | -10 | -8    | 0.27  | 0.33 |
| 8 | -10 | 9   | 1.10  | 0.47  |      |
| - | 8   | -10 | -9    | 1.62  | 0.38 |

|   |     |     |       |            |
|---|-----|-----|-------|------------|
| 8 | 11  | -12 | 0.12  | 0.44       |
| 8 | -11 | -12 | -0.13 | 0.35       |
| 8 | 11  | -11 | 0.03  | 0.41       |
| 8 | -11 | -11 | -0.21 | 0.32       |
| 8 | 11  | -10 | 4.26  | 0.58       |
| 8 | -11 | -10 | 4.30  | 0.49       |
| 8 | 11  | -9  | 0.55  | 0.39       |
| 8 | -11 | -9  | 0.84  | 0.29       |
| 8 | 11  | -8  | 6.15  | 0.59       |
| 8 | -11 | -8  | 6.91  | 0.50       |
| 8 | 11  | -7  | -0.15 | 0.35       |
| 8 | -11 | -7  | 0.01  | 0.25       |
| 8 | 11  | -6  | 0.16  | 0.30       |
| - | 8   | 11  | 6     | 0.07 0.22  |
| 8 | -11 | -6  | 0.03  | 0.26       |
| 8 | 11  | -5  | 15.88 | 0.83       |
| - | 8   | 11  | 5     | 15.52 0.69 |
| 8 | -11 | -5  | 16.03 | 0.66       |
| - | 8   | 11  | 4     | 0.09 0.22  |
| 8 | 11  | -4  | 0.38  | 0.29       |
| 8 | -11 | -4  | -0.11 | 0.24       |
| - | 8   | -11 | 4     | 0.01 0.17  |
| - | 8   | 11  | 3     | 0.53 0.21  |
| 8 | 11  | -3  | 0.63  | 0.30       |
| 8 | -11 | -3  | 0.27  | 0.24       |
| - | 8   | -11 | 3     | 0.52 0.19  |
| 8 | 11  | -2  | 2.27  | 0.33       |
| - | 8   | 11  | 2     | 2.28 0.25  |
| 8 | -11 | -2  | 2.18  | 0.25       |
| - | 8   | -11 | 2     | 2.42 0.29  |
| - | 8   | 11  | 1     | 0.05 0.23  |
| 8 | 11  | -1  | 0.19  | 0.32       |
| 8 | -11 | -1  | -0.12 | 0.22       |
| - | 8   | -11 | 1     | 0.07 0.20  |
| 8 | -11 | -1  | 0.11  | 0.23       |
| - | 8   | 11  | 0     | 9.52 0.51  |
| 8 | 11  | 0   | 8.31  | 0.64       |
| 8 | -11 | 0   | 8.75  | 0.45       |
| - | 8   | -11 | 0     | 8.38 0.46  |
| 8 | -11 | 0   | 8.64  | 0.53       |
| - | 8   | 11  | -1    | 5.14 0.39  |
| 8 | 11  | 1   | 4.27  | 0.55       |
| 8 | -11 | 1   | 4.95  | 0.42       |
| - | 8   | -11 | -1    | 5.96 0.36  |
| 8 | -11 | 1   | 5.26  | 0.41       |
| - | 8   | 11  | -2    | 4.25 0.42  |
| 8 | 11  | 2   | 3.16  | 0.40       |
| - | 8   | -11 | -2    | 3.65 0.37  |
| 8 | -11 | 2   | 3.69  | 0.40       |
| 8 | 11  | 3   | 1.30  | 0.38       |
| - | 8   | 11  | -3    | 2.50 0.30  |
| 8 | -11 | 3   | 2.95  | 0.41       |
| - | 8   | -11 | -3    | 2.68 0.28  |
| - | 8   | 11  | -4    | 0.50 0.26  |

|   |   |     |     |       |      |
|---|---|-----|-----|-------|------|
| - | 8 | -11 | -4  | 0.40  | 0.27 |
|   | 8 | -11 | 4   | 0.49  | 0.33 |
| - | 8 | 11  | -5  | 0.80  | 0.28 |
|   | 8 | 11  | 5   | 0.23  | 0.35 |
| - | 8 | -11 | -5  | 0.66  | 0.27 |
|   | 8 | -11 | 5   | 0.78  | 0.36 |
| - | 8 | 11  | -6  | 7.23  | 0.55 |
| - | 8 | -11 | -6  | 8.69  | 0.50 |
|   | 8 | -11 | 6   | 8.29  | 0.62 |
|   | 8 | -11 | 7   | 0.57  | 0.41 |
| - | 8 | -11 | -7  | 0.55  | 0.32 |
|   | 8 | -11 | 8   | 1.09  | 0.45 |
| - | 8 | -11 | -8  | 0.83  | 0.35 |
| - | 8 | -11 | -9  | 1.18  | 0.39 |
|   | 8 | 12  | -12 | 0.71  | 0.46 |
|   | 8 | -12 | -12 | 0.30  | 0.39 |
|   | 8 | 12  | -11 | 4.80  | 0.57 |
|   | 8 | -12 | -11 | 5.00  | 0.55 |
|   | 8 | 12  | -10 | 2.19  | 0.45 |
|   | 8 | -12 | -10 | 2.03  | 0.34 |
|   | 8 | 12  | -9  | 0.87  | 0.41 |
|   | 8 | -12 | -9  | 0.81  | 0.34 |
|   | 8 | 12  | -8  | 0.66  | 0.39 |
|   | 8 | -12 | -8  | 0.61  | 0.31 |
|   | 8 | 12  | -7  | 0.63  | 0.35 |
|   | 8 | -12 | -7  | 0.83  | 0.27 |
|   | 8 | 12  | -6  | 3.35  | 0.42 |
|   | 8 | -12 | -6  | 3.62  | 0.42 |
| - | 8 | 12  | 5   | 0.23  | 0.24 |
|   | 8 | 12  | -5  | 0.46  | 0.31 |
|   | 8 | -12 | -5  | 0.25  | 0.26 |
| - | 8 | 12  | 4   | 0.60  | 0.24 |
|   | 8 | 12  | -4  | 0.57  | 0.34 |
| - | 8 | -12 | 4   | 0.60  | 0.19 |
|   | 8 | -12 | -4  | 0.20  | 0.25 |
| - | 8 | 12  | 3   | 0.79  | 0.22 |
|   | 8 | 12  | -3  | 1.02  | 0.31 |
| - | 8 | -12 | 3   | 1.27  | 0.21 |
|   | 8 | -12 | -3  | 0.83  | 0.26 |
| - | 8 | 12  | 2   | 1.11  | 0.24 |
|   | 8 | 12  | -2  | 1.10  | 0.34 |
|   | 8 | -12 | -2  | 1.35  | 0.24 |
| - | 8 | -12 | 2   | 1.11  | 0.21 |
| - | 8 | 12  | 1   | 3.45  | 0.36 |
|   | 8 | 12  | -1  | 3.68  | 0.52 |
| - | 8 | -12 | 1   | 3.75  | 0.34 |
|   | 8 | -12 | -1  | 3.54  | 0.38 |
|   | 8 | 12  | 0   | -0.13 | 0.33 |
| - | 8 | 12  | 0   | 0.28  | 0.25 |
|   | 8 | -12 | 0   | 0.15  | 0.25 |
| - | 8 | -12 | 0   | 0.03  | 0.22 |
|   | 8 | -12 | 0   | 0.27  | 0.24 |
| - | 8 | 12  | -1  | 11.87 | 0.59 |
|   | 8 | 12  | 1   | 11.01 | 0.75 |

|   |   |     |     |       |      |
|---|---|-----|-----|-------|------|
| - | 8 | -12 | -1  | 12.41 | 0.58 |
|   | 8 | -12 | 1   | 12.57 | 0.66 |
|   | 8 | -12 | 1   | 12.00 | 0.58 |
| - | 8 | 12  | -2  | 3.59  | 0.38 |
|   | 8 | 12  | 2   | 3.19  | 0.41 |
| - | 8 | -12 | -2  | 4.17  | 0.39 |
|   | 8 | -12 | 2   | 4.09  | 0.41 |
|   | 8 | 12  | 3   | 0.84  | 0.35 |
| - | 8 | 12  | -3  | 1.59  | 0.29 |
| - | 8 | -12 | -3  | 1.66  | 0.26 |
|   | 8 | -12 | 3   | 1.71  | 0.32 |
| - | 8 | 12  | -4  | 1.32  | 0.29 |
|   | 8 | 12  | 4   | 0.73  | 0.35 |
| - | 8 | -12 | -4  | 1.29  | 0.27 |
|   | 8 | -12 | 4   | 1.39  | 0.35 |
| - | 8 | 12  | -5  | 0.97  | 0.29 |
|   | 8 | -12 | 5   | 0.73  | 0.36 |
| - | 8 | -12 | -5  | 0.73  | 0.30 |
| - | 8 | -12 | -6  | 0.51  | 0.31 |
|   | 8 | -12 | 6   | 0.64  | 0.36 |
| - | 8 | -12 | -7  | 0.45  | 0.33 |
|   | 8 | -12 | 7   | 0.45  | 0.38 |
| - | 8 | -12 | -8  | 0.71  | 0.36 |
|   | 8 | -12 | 8   | 0.97  | 0.46 |
|   | 8 | 13  | -11 | 0.60  | 0.46 |
|   | 8 | -13 | -11 | 0.10  | 0.38 |
|   | 8 | 13  | -10 | 0.34  | 0.39 |
|   | 8 | -13 | -10 | 0.34  | 0.33 |
|   | 8 | 13  | -9  | 1.22  | 0.43 |
|   | 8 | -13 | -9  | 1.34  | 0.35 |
|   | 8 | 13  | -8  | 2.57  | 0.44 |
|   | 8 | -13 | -8  | 2.49  | 0.35 |
|   | 8 | 13  | -7  | 4.72  | 0.59 |
|   | 8 | -13 | -7  | 5.33  | 0.47 |
|   | 8 | 13  | -6  | 4.40  | 0.56 |
|   | 8 | -13 | -6  | 4.13  | 0.40 |
|   | 8 | 13  | -5  | 0.24  | 0.35 |
|   | 8 | -13 | -5  | 0.19  | 0.28 |
| - | 8 | 13  | 4   | 3.34  | 0.38 |
|   | 8 | 13  | -4  | 3.25  | 0.41 |
|   | 8 | -13 | -4  | 2.61  | 0.29 |
| - | 8 | 13  | 3   | -0.17 | 0.24 |
|   | 8 | 13  | -3  | -0.01 | 0.33 |
|   | 8 | -13 | -3  | -0.12 | 0.26 |
| - | 8 | -13 | 3   | 0.11  | 0.21 |
| - | 8 | 13  | 2   | 1.68  | 0.26 |
|   | 8 | 13  | -2  | 2.07  | 0.38 |
| - | 8 | -13 | 2   | 1.84  | 0.24 |
|   | 8 | -13 | -2  | 1.96  | 0.26 |
|   | 8 | 13  | -1  | 1.52  | 0.35 |
| - | 8 | 13  | 1   | 1.46  | 0.28 |
|   | 8 | -13 | -1  | 1.44  | 0.25 |
| - | 8 | -13 | 1   | 1.33  | 0.24 |
|   | 8 | 13  | 0   | -0.10 | 0.34 |

|   |   |     |     |       |      |
|---|---|-----|-----|-------|------|
| - | 8 | 13  | 0   | 0.21  | 0.24 |
|   | 8 | -13 | 0   | -0.02 | 0.25 |
| - | 8 | -13 | 0   | 0.05  | 0.23 |
| - | 8 | 13  | -1  | 0.42  | 0.27 |
|   | 8 | 13  | 1   | 0.04  | 0.34 |
| - | 8 | -13 | -1  | 0.08  | 0.24 |
|   | 8 | -13 | 1   | 0.16  | 0.24 |
|   | 8 | -13 | 1   | 0.63  | 0.29 |
| - | 8 | 13  | -2  | 2.10  | 0.28 |
|   | 8 | 13  | 2   | 1.99  | 0.38 |
|   | 8 | -13 | 2   | 2.42  | 0.32 |
|   | 8 | -13 | 2   | 2.00  | 0.28 |
| - | 8 | -13 | -2  | 3.35  | 0.38 |
| - | 8 | 13  | -3  | 0.13  | 0.25 |
|   | 8 | 13  | 3   | -0.58 | 0.34 |
| - | 8 | -13 | -3  | 0.11  | 0.25 |
|   | 8 | -13 | 3   | -0.02 | 0.31 |
| - | 8 | 13  | -4  | 0.24  | 0.28 |
| - | 8 | -13 | -4  | -0.02 | 0.28 |
|   | 8 | -13 | 4   | 0.30  | 0.34 |
| - | 8 | 13  | -5  | 0.46  | 0.29 |
| - | 8 | -13 | -5  | 0.28  | 0.30 |
|   | 8 | -13 | 5   | 0.64  | 0.37 |
|   | 8 | -13 | 6   | 1.11  | 0.41 |
| - | 8 | -13 | -6  | 0.72  | 0.33 |
|   | 8 | -13 | 7   | 0.42  | 0.43 |
| - | 8 | -13 | -7  | 0.14  | 0.34 |
|   | 8 | 14  | -10 | 0.48  | 0.46 |
|   | 8 | -14 | -10 | 0.54  | 0.37 |
|   | 8 | 14  | -9  | 0.66  | 0.44 |
|   | 8 | -14 | -9  | 1.15  | 0.36 |
|   | 8 | 14  | -8  | 4.95  | 0.63 |
|   | 8 | -14 | -8  | 5.08  | 0.45 |
|   | 8 | 14  | -7  | 1.38  | 0.41 |
|   | 8 | -14 | -7  | 0.95  | 0.30 |
|   | 8 | 14  | -6  | 2.16  | 0.40 |
|   | 8 | -14 | -6  | 2.40  | 0.30 |
|   | 8 | 14  | -5  | 3.03  | 0.43 |
|   | 8 | -14 | -5  | 2.72  | 0.33 |
|   | 8 | 14  | -4  | 1.22  | 0.34 |
| - | 8 | 14  | 4   | 1.06  | 0.27 |
|   | 8 | -14 | -4  | 1.12  | 0.29 |
|   | 8 | 14  | -3  | 0.37  | 0.36 |
| - | 8 | 14  | 3   | -0.05 | 0.24 |
|   | 8 | -14 | -3  | 0.08  | 0.27 |
| - | 8 | -14 | 3   | 0.39  | 0.21 |
| - | 8 | 14  | 2   | 4.52  | 0.39 |
|   | 8 | 14  | -2  | 5.03  | 0.55 |
| - | 8 | -14 | 2   | 4.82  | 0.37 |
|   | 8 | -14 | -2  | 5.17  | 0.43 |
|   | 8 | 14  | -1  | 1.60  | 0.37 |
| - | 8 | 14  | 1   | 1.57  | 0.28 |
| - | 8 | -14 | 1   | 1.51  | 0.25 |
|   | 8 | -14 | -1  | 1.36  | 0.26 |

|   |     |     |       |      |      |
|---|-----|-----|-------|------|------|
| 8 | 14  | 0   | 1.24  | 0.36 |      |
| - | 8   | 14  | 0     | 1.45 | 0.29 |
| 8 | -14 | 0   | 1.57  | 0.26 |      |
| - | 8   | -14 | 0     | 1.44 | 0.26 |
| - | 8   | 14  | -1    | 0.41 | 0.28 |
| 8 | 14  | 1   | -0.10 | 0.35 |      |
| 8 | -14 | 1   | -0.02 | 0.27 |      |
| - | 8   | -14 | -1    | 0.26 | 0.25 |
| - | 8   | 14  | -2    | 0.27 | 0.28 |
| 8 | 14  | 2   | -0.32 | 0.35 |      |
| 8 | -14 | 2   | 0.37  | 0.31 |      |
| - | 8   | -14 | -2    | 0.22 | 0.27 |
| 8 | -14 | 2   | -0.02 | 0.28 |      |
| - | 8   | 14  | -3    | 0.69 | 0.29 |
| 8 | -14 | 3   | 0.78  | 0.35 |      |
| - | 8   | -14 | -3    | 0.71 | 0.27 |
| - | 8   | 14  | -4    | 0.54 | 0.29 |
| - | 8   | -14 | -4    | 0.40 | 0.28 |
| 8 | -14 | 4   | 0.61  | 0.36 |      |
| - | 8   | 14  | -5    | 0.82 | 0.31 |
| - | 8   | -14 | -5    | 1.09 | 0.33 |
| 8 | -14 | 5   | 1.32  | 0.39 |      |
| 8 | -14 | 6   | 0.47  | 0.41 |      |
| - | 8   | -14 | -6    | 0.70 | 0.34 |
| 8 | -14 | 7   | 0.90  | 0.44 |      |
| - | 8   | -14 | -7    | 0.40 | 0.32 |
| 8 | 15  | -10 | 0.86  | 0.49 |      |
| 8 | -15 | -10 | 0.70  | 0.40 |      |
| 8 | 15  | -9  | 1.48  | 0.48 |      |
| 8 | -15 | -9  | 1.57  | 0.37 |      |
| 8 | 15  | -8  | 7.43  | 0.72 |      |
| 8 | -15 | -8  | 8.33  | 0.57 |      |
| 8 | 15  | -7  | 1.35  | 0.43 |      |
| 8 | -15 | -7  | 1.65  | 0.32 |      |
| 8 | 15  | -6  | 0.35  | 0.37 |      |
| 8 | -15 | -6  | 0.58  | 0.29 |      |
| 8 | 15  | -5  | 0.95  | 0.40 |      |
| 8 | -15 | -5  | 0.29  | 0.28 |      |
| 8 | 15  | -4  | 0.24  | 0.37 |      |
| 8 | -15 | -4  | 0.01  | 0.29 |      |
| 8 | 15  | -3  | 0.60  | 0.37 |      |
| - | 8   | 15  | 3     | 0.51 | 0.28 |
| - | 8   | -15 | 3     | 0.62 | 0.23 |
| 8 | -15 | -3  | 0.39  | 0.29 |      |
| 8 | 15  | -2  | 0.20  | 0.35 |      |
| - | 8   | 15  | 2     | 0.17 | 0.27 |
| 8 | -15 | -2  | 0.44  | 0.26 |      |
| - | 8   | -15 | 2     | 0.05 | 0.23 |
| - | 8   | 15  | 1     | 0.41 | 0.26 |
| 8 | 15  | -1  | 0.23  | 0.37 |      |
| 8 | -15 | -1  | 0.53  | 0.28 |      |
| - | 8   | -15 | 1     | 0.40 | 0.25 |
| - | 8   | 15  | 0     | 1.46 | 0.30 |
| 8 | 15  | 0   | 1.57  | 0.39 |      |

|   |     |     |       |       |
|---|-----|-----|-------|-------|
| 8 | -15 | 0   | 1.74  | 0.29  |
| - | 8   | -15 | 0     | 1.60  |
| - | 8   | 15  | -1    | 1.13  |
| 8 | 15  | 1   | 1.20  | 0.37  |
| 8 | -15 | 1   | 1.28  | 0.29  |
| - | 8   | -15 | -1    | 1.43  |
| - | 8   | 15  | -2    | 0.21  |
| - | 8   | -15 | -2    | 0.04  |
| 8 | -15 | 2   | -0.07 | 0.30  |
| - | 8   | 15  | -3    | 0.39  |
| 8 | -15 | 3   | -0.07 | 0.29  |
| 8 | -15 | 3   | 0.52  | 0.36  |
| - | 8   | -15 | -3    | 0.48  |
| - | 8   | 15  | -4    | 0.65  |
| 8 | -15 | 4   | 0.41  | 0.37  |
| - | 8   | -15 | -4    | 0.35  |
| - | 8   | -15 | -5    | 0.40  |
| 8 | -15 | 5   | 0.55  | 0.39  |
| - | 8   | -15 | -6    | 0.36  |
| 8 | -15 | 6   | 0.23  | 0.42  |
| 8 | 16  | -9  | 0.34  | 0.47  |
| 8 | -16 | -9  | 0.69  | 0.35  |
| 8 | 16  | -8  | 0.48  | 0.46  |
| 8 | -16 | -8  | 0.91  | 0.36  |
| 8 | 16  | -7  | 0.48  | 0.44  |
| 8 | -16 | -7  | 0.28  | 0.31  |
| 8 | 16  | -6  | 0.43  | 0.38  |
| 8 | -16 | -6  | 0.12  | 0.33  |
| 8 | 16  | -5  | 0.40  | 0.40  |
| 8 | -16 | -5  | 0.23  | 0.29  |
| 8 | 16  | -4  | 0.26  | 0.39  |
| 8 | -16 | -4  | -0.12 | 0.30  |
| 8 | 16  | -3  | 0.26  | 0.36  |
| 8 | -16 | -3  | 0.23  | 0.30  |
| 8 | 16  | -2  | 0.30  | 0.37  |
| - | 8   | 16  | 2     | 0.59  |
| 8 | -16 | -2  | 0.23  | 0.30  |
| - | 8   | -16 | 2     | 0.37  |
| 8 | 16  | -1  | 1.79  | 0.39  |
| - | 8   | 16  | 1     | 2.55  |
| - | 8   | -16 | 1     | 2.24  |
| 8 | -16 | -1  | 2.34  | 0.33  |
| 8 | 16  | 0   | -0.28 | 0.38  |
| - | 8   | 16  | 0     | -0.04 |
| 8 | -16 | 0   | 0.16  | 0.31  |
| - | 8   | -16 | 0     | 0.26  |
| - | 8   | 16  | -1    | -0.13 |
| - | 8   | -16 | -1    | 0.35  |
| 8 | -16 | 1   | -0.07 | 0.31  |
| - | 8   | 16  | -2    | 0.66  |
| - | 8   | -16 | -2    | 0.50  |
| 8 | -16 | 2   | 0.52  | 0.32  |
| - | 8   | 16  | -3    | 0.39  |
| - | 8   | -16 | -3    | 0.56  |

|   |     |     |       |      |
|---|-----|-----|-------|------|
| 8 | -16 | 3   | -0.03 | 0.31 |
| - | 8   | 16  | -4    | 3.65 |
| - | 8   | -16 | -4    | 4.45 |
| 8 | -16 | 4   | 4.18  | 0.52 |
| 8 | -16 | 5   | 1.17  | 0.41 |
| - | 8   | -16 | -5    | 0.77 |
| 8 | -16 | 6   | 1.11  | 0.45 |
| 8 | 17  | -8  | 0.08  | 0.43 |
| 8 | -17 | -8  | 0.31  | 0.34 |
| 8 | 17  | -7  | 0.45  | 0.46 |
| 8 | -17 | -7  | 0.51  | 0.36 |
| 8 | 17  | -6  | 0.76  | 0.40 |
| 8 | -17 | -6  | 0.50  | 0.34 |
| 8 | 17  | -5  | 0.34  | 0.42 |
| 8 | -17 | -5  | 0.15  | 0.33 |
| 8 | 17  | -4  | 0.03  | 0.41 |
| 8 | -17 | -4  | 0.00  | 0.33 |
| 8 | 17  | -3  | 0.55  | 0.41 |
| 8 | -17 | -3  | 0.36  | 0.32 |
| 8 | 17  | -2  | 0.02  | 0.39 |
| - | 8   | -17 | 2     | 0.05 |
| 8 | -17 | -2  | 0.30  | 0.32 |
| 8 | 17  | -1  | 0.37  | 0.38 |
| - | 8   | -17 | 1     | 1.10 |
| 8 | -17 | -1  | 0.62  | 0.30 |
| - | 8   | 17  | 0     | 0.45 |
| 8 | -17 | 0   | 0.17  | 0.30 |
| - | 8   | -17 | 0     | 0.64 |
| - | 8   | 17  | -1    | 1.79 |
| 8 | -17 | 1   | 2.25  | 0.35 |
| - | 8   | -17 | -1    | 1.72 |
| - | 8   | 17  | -2    | 1.33 |
| - | 8   | -17 | -2    | 1.38 |
| 8 | -17 | 2   | 1.08  | 0.35 |
| - | 8   | 17  | -3    | 0.17 |
| 8 | -17 | 3   | 0.30  | 0.35 |
| - | 8   | -17 | -3    | 0.49 |
| - | 8   | 17  | -4    | 0.54 |
| 8 | -17 | 4   | 0.37  | 0.37 |
| - | 8   | -17 | -4    | 0.60 |
| 8 | 18  | -7  | 0.85  | 0.48 |
| 8 | -18 | -7  | 0.72  | 0.38 |
| 8 | 18  | -6  | 0.18  | 0.45 |
| 8 | -18 | -6  | 0.43  | 0.36 |
| 8 | 18  | -5  | 0.85  | 0.43 |
| 8 | -18 | -5  | 1.20  | 0.34 |
| 8 | 18  | -4  | 0.54  | 0.42 |
| 8 | -18 | -4  | 0.94  | 0.32 |
| 8 | 18  | -3  | 0.20  | 0.41 |
| 8 | -18 | -3  | 0.44  | 0.31 |
| 8 | 18  | -2  | 0.38  | 0.40 |
| 8 | -18 | -2  | 0.87  | 0.35 |
| - | 8   | -18 | 2     | 0.76 |
| 8 | -18 | -1  | 0.29  | 0.34 |

|   |   |     |     |       |      |
|---|---|-----|-----|-------|------|
| - | 8 | -18 | 1   | 0.16  | 0.29 |
| - | 8 | -18 | 0   | 0.30  | 0.31 |
|   | 8 | -18 | 0   | 0.30  | 0.34 |
|   | 8 | -18 | 1   | 0.20  | 0.35 |
| - | 8 | -18 | -1  | 0.25  | 0.31 |
| - | 8 | 18  | -2  | 0.10  | 0.33 |
| - | 8 | -18 | -2  | 0.40  | 0.33 |
|   | 8 | -18 | 2   | 0.01  | 0.36 |
| - | 8 | 18  | -3  | 0.39  | 0.33 |
|   | 8 | -18 | 3   | 0.46  | 0.37 |
| - | 8 | -18 | -3  | 0.40  | 0.34 |
|   | 8 | 19  | -6  | 0.52  | 0.47 |
|   | 8 | 19  | -5  | 0.00  | 0.45 |
|   | 8 | -19 | -5  | 0.54  | 0.37 |
|   | 8 | 19  | -4  | 2.54  | 0.49 |
|   | 8 | -19 | -4  | 2.32  | 0.39 |
|   | 8 | 19  | -3  | 0.20  | 0.42 |
|   | 8 | -19 | -3  | -0.01 | 0.33 |
|   | 8 | -19 | -2  | 0.15  | 0.36 |
| - | 8 | -19 | 1   | 0.38  | 0.33 |
|   | 8 | -19 | -1  | 0.42  | 0.35 |
|   | 8 | -19 | 0   | 0.16  | 0.36 |
| - | 8 | -19 | 0   | 0.22  | 0.32 |
|   | 8 | -19 | 1   | 1.04  | 0.38 |
| - | 8 | -19 | -1  | 1.08  | 0.34 |
| - | 8 | -19 | -2  | 0.37  | 0.35 |
|   | 8 | 20  | -5  | 0.24  | 0.46 |
|   | 8 | 20  | -4  | -0.12 | 0.47 |
| - | 8 | -20 | 1   | 0.39  | 0.35 |
| - | 8 | -20 | 0   | 0.10  | 0.34 |
|   | 9 | 0   | -14 | 2.63  | 0.46 |
|   | 9 | 0   | -13 | -0.59 | 0.33 |
|   | 9 | 0   | -12 | 2.66  | 0.38 |
|   | 9 | 0   | -11 | -0.87 | 0.30 |
|   | 9 | 0   | -10 | 0.94  | 0.27 |
|   | 9 | 0   | -10 | 0.35  | 0.30 |
|   | 9 | 0   | -9  | -0.08 | 0.24 |
|   | 9 | 0   | -9  | -0.68 | 0.26 |
|   | 9 | 0   | -8  | 28.83 | 1.07 |
|   | 9 | 0   | -8  | 27.53 | 1.26 |
|   | 9 | 0   | -7  | -0.07 | 0.22 |
|   | 9 | 0   | -7  | 0.23  | 0.21 |
| - | 9 | 0   | 7   | -0.05 | 0.15 |
| - | 9 | 0   | 6   | 1.27  | 0.18 |
|   | 9 | 0   | -6  | 1.56  | 0.24 |
|   | 9 | 0   | -6  | 1.55  | 0.22 |
|   | 9 | 0   | -5  | -0.12 | 0.17 |
|   | 9 | 0   | -5  | 0.08  | 0.21 |
| - | 9 | 0   | 5   | -0.02 | 0.16 |
|   | 9 | 0   | -4  | 15.38 | 0.77 |
| - | 9 | 0   | 4   | 15.73 | 0.65 |
|   | 9 | 0   | -4  | 16.68 | 0.63 |
|   | 9 | 0   | -3  | -0.31 | 0.23 |
| - | 9 | 0   | 3   | -0.08 | 0.17 |

|   |    |     |       |       |
|---|----|-----|-------|-------|
| 9 | 0  | -3  | -0.52 | 0.15  |
| - | 9  | 0   | 2     | 4.27  |
| 9 | 0  | -2  | 3.86  | 0.42  |
| 9 | 0  | -2  | 4.13  | 0.29  |
| 9 | 0  | -1  | 0.08  | 0.14  |
| 9 | 0  | -1  | 0.06  | 0.24  |
| - | 9  | 0   | 1     | -0.28 |
| 9 | 0  | 0   | 12.97 | 0.52  |
| - | 9  | 0   | 0     | 13.15 |
| 9 | 0  | 0   | 12.88 | 0.67  |
| 9 | 0  | 1   | 0.08  | 0.23  |
| - | 9  | 0   | -1    | 0.13  |
| 9 | 0  | 1   | 0.01  | 0.13  |
| - | 9  | 0   | -2    | 11.52 |
| 9 | 0  | 2   | 11.05 | 0.61  |
| - | 9  | 0   | -3    | -0.22 |
| 9 | 0  | 3   | 0.09  | 0.26  |
| - | 9  | 0   | -4    | 22.37 |
| 9 | 0  | 4   | 23.36 | 1.10  |
| 9 | 0  | 5   | 0.03  | 0.34  |
| - | 9  | 0   | -5    | -0.19 |
| 9 | 0  | 6   | 6.26  | 0.57  |
| - | 9  | 0   | -6    | 5.90  |
| 9 | 0  | 7   | 0.18  | 0.38  |
| - | 9  | 0   | -7    | -0.27 |
| - | 9  | 0   | -8    | -0.13 |
| 9 | 0  | 8   | 0.49  | 0.41  |
| 9 | 0  | 9   | 0.60  | 0.44  |
| - | 9  | 0   | -9    | 0.07  |
| 9 | 0  | 10  | 0.83  | 0.47  |
| 9 | 1  | -14 | -0.52 | 0.40  |
| 9 | -1 | -14 | -0.26 | 0.37  |
| 9 | 1  | -13 | 0.21  | 0.37  |
| 9 | -1 | -13 | 0.48  | 0.38  |
| 9 | 1  | -12 | -0.31 | 0.33  |
| 9 | -1 | -12 | 0.08  | 0.32  |
| 9 | 1  | -11 | 6.88  | 0.48  |
| 9 | 1  | -11 | 7.45  | 0.56  |
| 9 | -1 | -11 | 8.11  | 0.55  |
| 9 | 1  | -10 | 4.47  | 0.45  |
| 9 | 1  | -10 | 3.45  | 0.37  |
| 9 | -1 | -10 | 4.16  | 0.37  |
| 9 | 1  | -9  | -0.27 | 0.25  |
| 9 | 1  | -9  | -0.02 | 0.25  |
| 9 | -1 | -9  | -0.52 | 0.27  |
| 9 | -1 | -9  | 0.01  | 0.24  |
| 9 | 1  | -8  | 0.88  | 0.24  |
| 9 | 1  | -8  | 1.02  | 0.26  |
| 9 | -1 | -8  | 1.12  | 0.24  |
| 9 | -1 | -8  | 1.11  | 0.25  |
| - | 9  | 1   | 7     | 0.52  |
| 9 | 1  | -7  | 0.31  | 0.23  |
| 9 | 1  | -7  | 0.42  | 0.21  |
| 9 | -1 | -7  | 0.54  | 0.23  |

|   |    |    |       |       |
|---|----|----|-------|-------|
| 9 | -1 | -7 | -0.10 | 0.22  |
| - | 9  | -1 | 7     | 0.59  |
| - | 9  | 1  | 6     | 0.07  |
| 9 | 1  | -6 | -0.41 | 0.17  |
| 9 | 1  | -6 | 0.06  | 0.22  |
| 9 | -1 | -6 | 0.01  | 0.20  |
| 9 | -1 | -6 | -0.19 | 0.20  |
| - | 9  | -1 | 6     | 0.02  |
| - | 9  | 1  | 5     | 2.70  |
| 9 | 1  | -5 | 2.66  | 0.36  |
| 9 | 1  | -5 | 2.47  | 0.22  |
| 9 | -1 | -5 | 2.52  | 0.23  |
| - | 9  | -1 | 5     | 2.24  |
| 9 | -1 | -5 | 2.89  | 0.34  |
| 9 | 1  | -4 | 0.20  | 0.23  |
| - | 9  | 1  | 4     | -0.07 |
| 9 | 1  | -4 | -0.07 | 0.16  |
| 9 | -1 | -4 | -0.04 | 0.18  |
| - | 9  | -1 | 4     | 0.90  |
| 9 | -1 | -4 | -0.06 | 0.21  |
| - | 9  | 1  | 3     | 1.80  |
| 9 | 1  | -3 | 1.91  | 0.18  |
| 9 | 1  | -3 | 1.94  | 0.26  |
| 9 | -1 | -3 | 1.95  | 0.19  |
| 9 | -1 | -3 | 1.64  | 0.24  |
| - | 9  | -1 | 3     | 1.98  |
| - | 9  | 1  | 2     | -0.10 |
| 9 | 1  | -2 | -0.16 | 0.24  |
| 9 | 1  | -2 | -0.10 | 0.14  |
| 9 | -1 | -2 | 0.14  | 0.24  |
| - | 9  | -1 | 2     | 0.23  |
| 9 | -1 | -2 | 0.10  | 0.15  |
| - | 9  | 1  | 1     | 17.57 |
| 9 | 1  | -1 | 18.58 | 0.90  |
| 9 | 1  | -1 | 18.89 | 0.69  |
| 9 | -1 | -1 | 19.15 | 0.89  |
| 9 | -1 | -1 | 18.55 | 0.69  |
| - | 9  | -1 | 1     | 17.14 |
| - | 9  | 1  | 0     | 0.85  |
| 9 | 1  | 0  | 0.88  | 0.14  |
| 9 | 1  | 0  | 0.98  | 0.28  |
| - | 9  | -1 | 0     | 0.81  |
| 9 | -1 | 0  | 1.01  | 0.26  |
| 9 | -1 | 0  | 0.95  | 0.15  |
| - | 9  | 1  | -1    | 0.75  |
| 9 | 1  | 1  | 1.31  | 0.28  |
| 9 | -1 | 1  | 0.66  | 0.24  |
| 9 | -1 | 1  | 0.73  | 0.15  |
| - | 9  | -1 | -1    | 0.62  |
| 9 | 1  | 2  | 13.61 | 0.71  |
| - | 9  | 1  | -2    | 14.29 |
| - | 9  | -1 | -2    | 13.77 |
| 9 | -1 | 2  | 13.83 | 0.73  |
| - | 9  | 1  | -3    | 4.89  |

|   |    |     |       |       |      |
|---|----|-----|-------|-------|------|
| 9 | 1  | 3   | 4.31  | 0.42  |      |
| - | 9  | -1  | -3    | 5.30  | 0.41 |
| 9 | -1 | 3   | 4.68  | 0.43  |      |
| 9 | 1  | 4   | 0.08  | 0.30  |      |
| - | 9  | 1   | -4    | -0.02 | 0.27 |
| - | 9  | -1  | -4    | 0.14  | 0.23 |
| 9 | -1 | 4   | 0.13  | 0.33  |      |
| - | 9  | 1   | -5    | 1.11  | 0.29 |
| 9 | 1  | 5   | 1.06  | 0.34  |      |
| 9 | -1 | 5   | 0.98  | 0.35  |      |
| - | 9  | -1  | -5    | 0.99  | 0.28 |
| - | 9  | 1   | -6    | 0.27  | 0.30 |
| 9 | 1  | 6   | 0.40  | 0.32  |      |
| 9 | -1 | 6   | 0.21  | 0.33  |      |
| - | 9  | -1  | -6    | -0.04 | 0.28 |
| - | 9  | 1   | -7    | 1.69  | 0.35 |
| 9 | 1  | 7   | 1.89  | 0.40  |      |
| 9 | -1 | 7   | 1.96  | 0.41  |      |
| - | 9  | -1  | -7    | 1.72  | 0.33 |
| - | 9  | 1   | -8    | -0.40 | 0.35 |
| 9 | 1  | 8   | 0.21  | 0.40  |      |
| 9 | -1 | 8   | 0.10  | 0.41  |      |
| - | 9  | -1  | -8    | 0.10  | 0.33 |
| 9 | 1  | 9   | 1.24  | 0.44  |      |
| 9 | -1 | 9   | 1.45  | 0.45  |      |
| - | 9  | -1  | -9    | 0.84  | 0.37 |
| 9 | 1  | 10  | 1.01  | 0.47  |      |
| 9 | -1 | 10  | 0.73  | 0.47  |      |
| 9 | 2  | -14 | 0.21  | 0.40  |      |
| 9 | -2 | -14 | -0.01 | 0.42  |      |
| 9 | 2  | -13 | -0.60 | 0.36  |      |
| 9 | -2 | -13 | -0.52 | 0.39  |      |
| 9 | 2  | -12 | 4.68  | 0.51  |      |
| 9 | -2 | -12 | 5.50  | 0.54  |      |
| 9 | 2  | -11 | 0.62  | 0.31  |      |
| 9 | 2  | -11 | -0.11 | 0.29  |      |
| 9 | -2 | -11 | 0.38  | 0.33  |      |
| 9 | 2  | -10 | -0.27 | 0.26  |      |
| 9 | 2  | -10 | 0.00  | 0.27  |      |
| 9 | -2 | -10 | -0.31 | 0.31  |      |
| 9 | 2  | -9  | 1.58  | 0.25  |      |
| 9 | 2  | -9  | 1.73  | 0.29  |      |
| 9 | -2 | -9  | 1.83  | 0.31  |      |
| 9 | 2  | -8  | 7.54  | 0.52  |      |
| 9 | 2  | -8  | 7.31  | 0.44  |      |
| 9 | -2 | -8  | 8.91  | 0.51  |      |
| 9 | -2 | -8  | 8.07  | 0.49  |      |
| 9 | 2  | -7  | 0.05  | 0.24  |      |
| 9 | 2  | -7  | -0.04 | 0.19  |      |
| - | 9  | 2   | 7     | 0.22  | 0.16 |
| 9 | -2 | -7  | 0.03  | 0.23  |      |
| 9 | -2 | -7  | 0.11  | 0.21  |      |
| 9 | 2  | -6  | 0.00  | 0.16  |      |
| - | 9  | 2   | 6     | 0.13  | 0.17 |

|   |    |    |       |       |
|---|----|----|-------|-------|
| 9 | 2  | -6 | 0.05  | 0.23  |
| - | 9  | -2 | 6     | 0.05  |
| 9 | -2 | -6 | 0.00  | 0.19  |
| 9 | -2 | -6 | -0.20 | 0.21  |
| 9 | 2  | -5 | 2.44  | 0.20  |
| - | 9  | 2  | 5     | 3.16  |
| 9 | 2  | -5 | 2.90  | 0.38  |
| 9 | -2 | -5 | 2.97  | 0.24  |
| 9 | -2 | -5 | 2.94  | 0.32  |
| - | 9  | -2 | 5     | 2.26  |
| 9 | 2  | -4 | 61.33 | 2.63  |
| 9 | 2  | -4 | 57.87 | 2.12  |
| - | 9  | 2  | 4     | 60.42 |
| 9 | -2 | -4 | 59.70 | 2.61  |
| 9 | -2 | -4 | 65.62 | 2.14  |
| - | 9  | -2 | 4     | 64.12 |
| 9 | 2  | -3 | 1.79  | 0.27  |
| 9 | 2  | -3 | 1.67  | 0.16  |
| - | 9  | 2  | 3     | 1.77  |
| 9 | -2 | -3 | 1.74  | 0.20  |
| 9 | -2 | -3 | 1.74  | 0.25  |
| - | 9  | -2 | 3     | 1.95  |
| 9 | 2  | -2 | 18.11 | 0.90  |
| - | 9  | 2  | 2     | 17.36 |
| 9 | -2 | -2 | 18.88 | 0.87  |
| 9 | -2 | -2 | 18.96 | 0.70  |
| - | 9  | -2 | 2     | 18.13 |
| 9 | 2  | -1 | 19.43 | 0.93  |
| - | 9  | 2  | 1     | 19.32 |
| 9 | -2 | -1 | 20.09 | 0.74  |
| - | 9  | -2 | 1     | 18.65 |
| 9 | -2 | -1 | 19.41 | 0.92  |
| 9 | 2  | 0  | -0.01 | 0.24  |
| - | 9  | 2  | 0     | -0.08 |
| 9 | -2 | 0  | 0.16  | 0.22  |
| 9 | -2 | 0  | 0.14  | 0.15  |
| - | 9  | -2 | 0     | -0.10 |
| 9 | 2  | 1  | 3.18  | 0.39  |
| - | 9  | 2  | -1    | 3.56  |
| - | 9  | -2 | -1    | 3.17  |
| 9 | -2 | 1  | 3.66  | 0.28  |
| 9 | -2 | 1  | 3.80  | 0.36  |
| 9 | 2  | 2  | 10.89 | 0.63  |
| - | 9  | 2  | -2    | 10.39 |
| - | 9  | -2 | -2    | 9.86  |
| 9 | -2 | 2  | 10.10 | 0.58  |
| - | 9  | 2  | -3    | -0.09 |
| 9 | 2  | 3  | -0.50 | 0.28  |
| - | 9  | -2 | -3    | -0.29 |
| 9 | -2 | 3  | -0.25 | 0.30  |
| - | 9  | 2  | -4    | 0.59  |
| 9 | 2  | 4  | 0.79  | 0.31  |
| - | 9  | -2 | -4    | 0.76  |
| 9 | -2 | 4  | 0.54  | 0.30  |

|   |   |    |     |       |      |
|---|---|----|-----|-------|------|
| - | 9 | 2  | -5  | 1.43  | 0.28 |
|   | 9 | 2  | 5   | 1.21  | 0.33 |
| - | 9 | -2 | -5  | 1.35  | 0.28 |
|   | 9 | -2 | 5   | 1.43  | 0.33 |
| - | 9 | 2  | -6  | 1.38  | 0.33 |
|   | 9 | 2  | 6   | 1.86  | 0.36 |
| - | 9 | 2  | -6  | 1.40  | 0.24 |
| - | 9 | -2 | -6  | 1.50  | 0.27 |
|   | 9 | -2 | 6   | 1.81  | 0.38 |
| - | 9 | 2  | -7  | 2.62  | 0.37 |
|   | 9 | 2  | 7   | 3.40  | 0.46 |
| - | 9 | 2  | -7  | 2.38  | 0.27 |
|   | 9 | -2 | 7   | 2.42  | 0.43 |
| - | 9 | -2 | -7  | 2.59  | 0.34 |
| - | 9 | 2  | -8  | 0.86  | 0.40 |
|   | 9 | 2  | 8   | 1.62  | 0.40 |
| - | 9 | -2 | -8  | 1.57  | 0.35 |
|   | 9 | -2 | 8   | 1.19  | 0.39 |
|   | 9 | 2  | 9   | 0.87  | 0.42 |
| - | 9 | -2 | -9  | -0.04 | 0.35 |
|   | 9 | -2 | 9   | 0.40  | 0.44 |
|   | 9 | 2  | 10  | 2.36  | 0.49 |
|   | 9 | -2 | 10  | 2.05  | 0.49 |
|   | 9 | 3  | -14 | -0.32 | 0.40 |
|   | 9 | -3 | -14 | -0.40 | 0.42 |
|   | 9 | 3  | -13 | -0.55 | 0.34 |
|   | 9 | -3 | -13 | -0.60 | 0.38 |
|   | 9 | 3  | -12 | -0.24 | 0.32 |
|   | 9 | 3  | -12 | 0.02  | 0.34 |
|   | 9 | -3 | -12 | -0.62 | 0.36 |
|   | 9 | 3  | -11 | 2.22  | 0.31 |
|   | 9 | 3  | -11 | 2.17  | 0.34 |
|   | 9 | -3 | -11 | 1.98  | 0.37 |
|   | 9 | 3  | -10 | 0.18  | 0.29 |
|   | 9 | 3  | -10 | 0.30  | 0.25 |
|   | 9 | -3 | -10 | -0.35 | 0.31 |
|   | 9 | 3  | -9  | 5.61  | 0.40 |
|   | 9 | 3  | -9  | 5.70  | 0.48 |
|   | 9 | -3 | -9  | 5.63  | 0.44 |
| - | 9 | 3  | 8   | 0.22  | 0.18 |
|   | 9 | 3  | -8  | 0.12  | 0.26 |
|   | 9 | 3  | -8  | 0.16  | 0.20 |
|   | 9 | -3 | -8  | -0.26 | 0.26 |
|   | 9 | 3  | -7  | 6.38  | 0.48 |
|   | 9 | 3  | -7  | 6.28  | 0.37 |
| - | 9 | 3  | 7   | 6.65  | 0.38 |
|   | 9 | -3 | -7  | 6.87  | 0.46 |
|   | 9 | -3 | -7  | 6.75  | 0.43 |
|   | 9 | 3  | -6  | 13.17 | 0.71 |
| - | 9 | 3  | 6   | 14.18 | 0.59 |
|   | 9 | 3  | -6  | 13.24 | 0.56 |
| - | 9 | -3 | 6   | 13.89 | 0.57 |
|   | 9 | -3 | -6  | 12.77 | 0.66 |
|   | 9 | -3 | -6  | 15.20 | 0.61 |

|   |    |    |       |       |      |
|---|----|----|-------|-------|------|
| 9 | 3  | -5 | 13.66 | 0.73  |      |
| - | 9  | 3  | 5     | 14.07 | 0.59 |
| 9 | 3  | -5 | 13.42 | 0.55  |      |
| 9 | -3 | -5 | 14.90 | 0.61  |      |
| 9 | -3 | -5 | 13.97 | 0.69  |      |
| - | 9  | -3 | 5     | 13.98 | 0.59 |
| 9 | 3  | -4 | 2.48  | 0.30  |      |
| - | 9  | 3  | 4     | 1.95  | 0.21 |
| - | 9  | -3 | 4     | 2.24  | 0.26 |
| 9 | -3 | -4 | 2.20  | 0.22  |      |
| 9 | -3 | -4 | 2.33  | 0.31  |      |
| - | 9  | 3  | 3     | 4.41  | 0.30 |
| 9 | 3  | -3 | 4.41  | 0.44  |      |
| 9 | -3 | -3 | 4.51  | 0.33  |      |
| - | 9  | -3 | 3     | 4.59  | 0.31 |
| 9 | -3 | -3 | 4.34  | 0.38  |      |
| 9 | 3  | -2 | 1.73  | 0.31  |      |
| - | 9  | 3  | 2     | 1.91  | 0.23 |
| 9 | -3 | -2 | 2.23  | 0.20  |      |
| - | 9  | -3 | 2     | 2.18  | 0.25 |
| 9 | -3 | -2 | 2.46  | 0.27  |      |
| 9 | 3  | -1 | 25.38 | 1.15  |      |
| - | 9  | 3  | 1     | 24.22 | 0.96 |
| 9 | -3 | -1 | 24.23 | 0.89  |      |
| - | 9  | -3 | 1     | 23.62 | 0.94 |
| 9 | -3 | -1 | 24.87 | 1.11  |      |
| 9 | 3  | 0  | 9.58  | 0.60  |      |
| - | 9  | 3  | 0     | 9.07  | 0.50 |
| - | 9  | -3 | 0     | 8.58  | 0.46 |
| 9 | -3 | 0  | 9.05  | 0.42  |      |
| 9 | -3 | 0  | 9.03  | 0.54  |      |
| - | 9  | 3  | -1    | -0.31 | 0.22 |
| 9 | 3  | 1  | 0.06  | 0.26  |      |
| 9 | -3 | 1  | -0.01 | 0.15  |      |
| 9 | -3 | 1  | 0.12  | 0.26  |      |
| - | 9  | -3 | -1    | -0.01 | 0.19 |
| - | 9  | 3  | -2    | -0.20 | 0.24 |
| 9 | 3  | 2  | -0.07 | 0.28  |      |
| - | 9  | -3 | -2    | -0.08 | 0.22 |
| 9 | -3 | 2  | -0.11 | 0.29  |      |
| - | 9  | 3  | -3    | 4.03  | 0.44 |
| 9 | 3  | 3  | 3.58  | 0.47  |      |
| - | 9  | -3 | -3    | 3.95  | 0.34 |
| 9 | -3 | 3  | 3.75  | 0.46  |      |
| - | 9  | 3  | -4    | -0.05 | 0.27 |
| 9 | 3  | 4  | 0.16  | 0.29  |      |
| 9 | -3 | 4  | 0.14  | 0.29  |      |
| - | 9  | -3 | -4    | 0.01  | 0.23 |
| - | 9  | 3  | -5    | 0.71  | 0.31 |
| 9 | 3  | 5  | 1.08  | 0.32  |      |
| 9 | -3 | 5  | 0.81  | 0.32  |      |
| - | 9  | -3 | -5    | 0.74  | 0.25 |
| - | 9  | 3  | -6    | 0.08  | 0.31 |
| 9 | 3  | 6  | 0.85  | 0.33  |      |

|   |    |     |      |       |      |
|---|----|-----|------|-------|------|
| 9 | -3 | 6   | 0.40 | 0.33  |      |
| - | 9  | -3  | -6   | 0.65  | 0.26 |
| 9 | 3  | 7   | 0.37 | 0.34  |      |
| - | 9  | 3   | -7   | -0.68 | 0.33 |
| - | 9  | 3   | -7   | 0.08  | 0.25 |
| 9 | -3 | 7   | 0.16 | 0.35  |      |
| - | 9  | -3  | -7   | 0.26  | 0.30 |
| - | 9  | 3   | -8   | 4.12  | 0.46 |
| - | 9  | 3   | -8   | 3.71  | 0.40 |
| 9 | 3  | 8   | 4.96 | 0.56  |      |
| - | 9  | -3  | -8   | 4.46  | 0.52 |
| 9 | -3 | 8   | 4.95 | 0.59  |      |
| 9 | 3  | 9   | 5.96 | 0.62  |      |
| - | 9  | -3  | -9   | 5.29  | 0.57 |
| 9 | -3 | 9   | 4.92 | 0.57  |      |
| 9 | 3  | 10  | 0.61 | 0.42  |      |
| 9 | 4  | -14 | 0.26 | 0.39  |      |
| 9 | -4 | -14 | 0.32 | 0.42  |      |
| 9 | 4  | -13 | 1.93 | 0.38  |      |
| 9 | 4  | -13 | 2.37 | 0.38  |      |
| 9 | -4 | -13 | 2.05 | 0.42  |      |
| 9 | 4  | -12 | 2.57 | 0.38  |      |
| 9 | 4  | -12 | 2.50 | 0.35  |      |
| 9 | -4 | -12 | 2.88 | 0.40  |      |
| 9 | 4  | -11 | 0.91 | 0.29  |      |
| 9 | 4  | -11 | 0.81 | 0.33  |      |
| 9 | -4 | -11 | 0.42 | 0.35  |      |
| 9 | 4  | -10 | 0.50 | 0.27  |      |
| 9 | 4  | -10 | 0.32 | 0.30  |      |
| 9 | -4 | -10 | 0.07 | 0.32  |      |
| 9 | 4  | -9  | 1.46 | 0.32  |      |
| 9 | 4  | -9  | 1.46 | 0.24  |      |
| 9 | -4 | -9  | 1.19 | 0.31  |      |
| 9 | 4  | -8  | 3.92 | 0.45  |      |
| 9 | 4  | -8  | 4.02 | 0.33  |      |
| - | 9  | 4   | 8    | 3.85  | 0.33 |
| 9 | -4 | -8  | 4.25 | 0.44  |      |
| 9 | 4  | -7  | 3.53 | 0.42  |      |
| - | 9  | 4   | 7    | 3.97  | 0.31 |
| 9 | 4  | -7  | 4.05 | 0.32  |      |
| 9 | -4 | -7  | 4.17 | 0.41  |      |
| 9 | 4  | -6  | 3.28 | 0.42  |      |
| - | 9  | 4   | 6    | 3.40  | 0.29 |
| - | 9  | -4  | 6    | 3.24  | 0.29 |
| 9 | -4 | -6  | 3.13 | 0.33  |      |
| 9 | -4 | -6  | 3.25 | 0.28  |      |
| - | 9  | 4   | 5    | 2.79  | 0.29 |
| 9 | 4  | -5  | 2.92 | 0.36  |      |
| - | 9  | -4  | 5    | 2.78  | 0.29 |
| 9 | -4 | -5  | 2.63 | 0.25  |      |
| 9 | -4 | -5  | 2.72 | 0.29  |      |
| - | 9  | 4   | 4    | 1.30  | 0.18 |
| 9 | 4  | -4  | 1.50 | 0.29  |      |
| - | 9  | -4  | 4    | 1.36  | 0.17 |

|   |    |    |       |       |
|---|----|----|-------|-------|
| 9 | -4 | -4 | 1.35  | 0.23  |
| 9 | -4 | -4 | 1.06  | 0.21  |
| - | 9  | 4  | 3     | 2.88  |
| 9 | 4  | -3 | 3.04  | 0.33  |
| - | 9  | -4 | 3     | 3.00  |
| 9 | -4 | -3 | 2.88  | 0.33  |
| 9 | -4 | -3 | 3.35  | 0.32  |
| 9 | 4  | -2 | 2.79  | 0.39  |
| - | 9  | 4  | 2     | 3.33  |
| 9 | -4 | -2 | 3.59  | 0.30  |
| - | 9  | -4 | 2     | 3.39  |
| 9 | -4 | -2 | 3.26  | 0.36  |
| - | 9  | 4  | 1     | -0.22 |
| 9 | 4  | -1 | -0.28 | 0.28  |
| 9 | -4 | -1 | -0.04 | 0.16  |
| - | 9  | -4 | 1     | -0.04 |
| 9 | -4 | -1 | 0.00  | 0.23  |
| - | 9  | 4  | 0     | 15.94 |
| 9 | 4  | 0  | 17.63 | 0.87  |
| - | 9  | -4 | 0     | 15.64 |
| 9 | -4 | 0  | 15.84 | 0.79  |
| 9 | -4 | 0  | 16.55 | 0.64  |
| - | 9  | 4  | -1    | -0.13 |
| 9 | 4  | 1  | 0.25  | 0.26  |
| 9 | -4 | 1  | 0.27  | 0.28  |
| 9 | -4 | 1  | 0.17  | 0.16  |
| - | 9  | -4 | -1    | 0.07  |
| - | 9  | 4  | -2    | 2.65  |
| 9 | 4  | 2  | 3.38  | 0.36  |
| - | 9  | -4 | -2    | 3.15  |
| 9 | -4 | 2  | 2.77  | 0.35  |
| 9 | 4  | 3  | 3.19  | 0.35  |
| - | 9  | 4  | -3    | 2.98  |
| - | 9  | -4 | -3    | 3.36  |
| 9 | -4 | 3  | 2.70  | 0.36  |
| 9 | 4  | 4  | 0.61  | 0.29  |
| - | 9  | 4  | -4    | 0.55  |
| 9 | -4 | 4  | 0.77  | 0.33  |
| - | 9  | -4 | -4    | 0.57  |
| - | 9  | 4  | -5    | 14.86 |
| 9 | 4  | 5  | 14.30 | 0.79  |
| 9 | -4 | 5  | 14.03 | 0.80  |
| - | 9  | -4 | -5    | 14.27 |
| - | 9  | 4  | -6    | 2.79  |
| 9 | 4  | 6  | 3.20  | 0.38  |
| 9 | -4 | 6  | 3.03  | 0.41  |
| - | 9  | -4 | -6    | 3.01  |
| 9 | 4  | 7  | 1.31  | 0.36  |
| - | 9  | 4  | -7    | 0.92  |
| - | 9  | 4  | -7    | 1.11  |
| - | 9  | -4 | -7    | 1.20  |
| 9 | -4 | 7  | 1.27  | 0.40  |
| 9 | 4  | 8  | 0.37  | 0.36  |
| - | 9  | 4  | -8    | 0.15  |

|   |   |    |     |       |      |
|---|---|----|-----|-------|------|
| - | 9 | 4  | -8  | -0.45 | 0.37 |
| - | 9 | -4 | -8  | 0.34  | 0.32 |
|   | 9 | -4 | 8   | 0.36  | 0.41 |
|   | 9 | 4  | 9   | 0.68  | 0.39 |
| - | 9 | 4  | -9  | -0.06 | 0.31 |
| - | 9 | -4 | -9  | 0.63  | 0.35 |
|   | 9 | -4 | 9   | 0.53  | 0.40 |
|   | 9 | 4  | 10  | 1.03  | 0.41 |
|   | 9 | 5  | -14 | -0.47 | 0.38 |
|   | 9 | 5  | -13 | 2.67  | 0.41 |
|   | 9 | 5  | -13 | 2.57  | 0.39 |
|   | 9 | -5 | -13 | 2.48  | 0.40 |
|   | 9 | 5  | -12 | 1.23  | 0.36 |
|   | 9 | 5  | -12 | 1.21  | 0.33 |
|   | 9 | -5 | -12 | 1.34  | 0.36 |
|   | 9 | 5  | -11 | 0.44  | 0.28 |
|   | 9 | 5  | -11 | 0.79  | 0.34 |
|   | 9 | -5 | -11 | 0.68  | 0.36 |
|   | 9 | 5  | -10 | 0.97  | 0.27 |
|   | 9 | 5  | -10 | 0.71  | 0.32 |
|   | 9 | -5 | -10 | 0.81  | 0.33 |
|   | 9 | 5  | -9  | 0.17  | 0.31 |
|   | 9 | 5  | -9  | 0.35  | 0.23 |
|   | 9 | -5 | -9  | -0.28 | 0.27 |
| - | 9 | 5  | 8   | 0.11  | 0.18 |
|   | 9 | 5  | -8  | 0.15  | 0.29 |
|   | 9 | 5  | -8  | 0.09  | 0.18 |
|   | 9 | -5 | -8  | -0.04 | 0.25 |
|   | 9 | 5  | -7  | 0.90  | 0.29 |
| - | 9 | 5  | 7   | 0.90  | 0.19 |
|   | 9 | -5 | -7  | 0.90  | 0.24 |
| - | 9 | 5  | 6   | 1.95  | 0.21 |
|   | 9 | 5  | -6  | 2.01  | 0.31 |
|   | 9 | -5 | -6  | 2.24  | 0.31 |
|   | 9 | -5 | -6  | 1.88  | 0.26 |
|   | 9 | 5  | -5  | 9.51  | 0.59 |
| - | 9 | 5  | 5   | 9.34  | 0.45 |
|   | 9 | -5 | -5  | 8.98  | 0.45 |
| - | 9 | -5 | 5   | 9.29  | 0.42 |
|   | 9 | -5 | -5  | 9.34  | 0.50 |
| - | 9 | 5  | 4   | 13.06 | 0.56 |
|   | 9 | 5  | -4  | 12.90 | 0.68 |
|   | 9 | -5 | -4  | 12.17 | 0.63 |
| - | 9 | -5 | 4   | 12.71 | 0.53 |
|   | 9 | -5 | -4  | 11.93 | 0.53 |
|   | 9 | 5  | -3  | 0.55  | 0.29 |
| - | 9 | 5  | 3   | 0.37  | 0.19 |
|   | 9 | -5 | -3  | 0.22  | 0.19 |
|   | 9 | -5 | -3  | 0.26  | 0.20 |
| - | 9 | -5 | 3   | 0.27  | 0.17 |
| - | 9 | 5  | 2   | 4.48  | 0.36 |
|   | 9 | 5  | -2  | 3.39  | 0.47 |
|   | 9 | -5 | -2  | 4.13  | 0.33 |
| - | 9 | -5 | 2   | 4.22  | 0.32 |

|   |    |     |       |       |
|---|----|-----|-------|-------|
| 9 | -5 | -2  | 4.12  | 0.36  |
| - | 9  | 5   | 1     | 9.97  |
| 9 | 5  | -1  | 10.11 | 0.63  |
| 9 | -5 | -1  | 10.54 | 0.57  |
| 9 | -5 | -1  | 10.64 | 0.47  |
| - | 9  | -5  | 1     | 10.93 |
| - | 9  | 5   | 0     | -0.14 |
| 9 | 5  | 0   | -0.43 | 0.29  |
| 9 | -5 | 0   | 0.31  | 0.25  |
| 9 | -5 | 0   | 0.09  | 0.17  |
| - | 9  | -5  | 0     | -0.02 |
| - | 9  | 5   | -1    | 4.65  |
| 9 | 5  | 1   | 5.01  | 0.47  |
| - | 9  | -5  | -1    | 5.73  |
| 9 | -5 | 1   | 5.53  | 0.34  |
| 9 | -5 | 1   | 5.13  | 0.46  |
| - | 9  | 5   | -2    | 0.06  |
| 9 | 5  | 2   | -0.15 | 0.29  |
| 9 | -5 | 2   | -0.22 | 0.29  |
| - | 9  | -5  | -2    | 0.14  |
| 9 | 5  | 3   | 0.52  | 0.32  |
| - | 9  | 5   | -3    | 0.29  |
| - | 9  | -5  | -3    | 0.72  |
| 9 | -5 | 3   | 0.50  | 0.31  |
| 9 | 5  | 4   | 8.79  | 0.57  |
| - | 9  | 5   | -4    | 7.56  |
| 9 | -5 | 4   | 8.36  | 0.55  |
| - | 9  | -5  | -4    | 8.90  |
| 9 | 5  | 5   | 0.92  | 0.32  |
| - | 9  | 5   | -5    | -0.32 |
| - | 9  | -5  | -5    | 0.36  |
| 9 | -5 | 5   | 0.54  | 0.35  |
| - | 9  | 5   | -6    | 0.48  |
| 9 | 5  | 6   | 0.98  | 0.35  |
| 9 | -5 | 6   | 0.43  | 0.37  |
| - | 9  | -5  | -6    | 0.86  |
| 9 | 5  | 7   | 1.20  | 0.36  |
| - | 9  | 5   | -7    | 0.38  |
| - | 9  | -5  | -7    | 0.89  |
| 9 | -5 | 7   | 0.88  | 0.40  |
| 9 | 5  | 8   | 1.02  | 0.37  |
| - | 9  | 5   | -8    | 0.87  |
| - | 9  | -5  | -8    | 1.12  |
| 9 | -5 | 8   | 1.27  | 0.43  |
| - | 9  | 5   | -9    | 1.92  |
| 9 | 5  | 9   | 2.58  | 0.43  |
| 9 | -5 | 9   | 1.98  | 0.47  |
| - | 9  | -5  | -9    | 2.16  |
| - | 9  | 5   | -10   | 1.11  |
| 9 | 6  | -14 | 0.70  | 0.39  |
| 9 | 6  | -14 | 0.37  | 0.42  |
| 9 | 6  | -13 | 4.25  | 0.57  |
| 9 | 6  | -13 | 4.11  | 0.42  |
| 9 | -6 | -13 | 4.55  | 0.46  |

|   |    |     |       |            |
|---|----|-----|-------|------------|
| 9 | 6  | -12 | -0.31 | 0.36       |
| 9 | -6 | -12 | -0.54 | 0.37       |
| 9 | 6  | -11 | 0.81  | 0.36       |
| 9 | -6 | -11 | 0.30  | 0.33       |
| 9 | 6  | -10 | 0.22  | 0.30       |
| 9 | -6 | -10 | -0.45 | 0.29       |
| 9 | 6  | -9  | 0.63  | 0.34       |
| 9 | -6 | -9  | 0.65  | 0.30       |
| - | 9  | 6   | 8     | 1.92 0.23  |
| 9 | 6  | -8  | 1.51  | 0.33       |
| 9 | -6 | -8  | 1.79  | 0.28       |
| 9 | 6  | -7  | 0.21  | 0.30       |
| - | 9  | 6   | 7     | 0.38 0.19  |
| 9 | -6 | -7  | 0.10  | 0.26       |
| 9 | 6  | -6  | 0.87  | 0.28       |
| - | 9  | 6   | 6     | 0.82 0.20  |
| 9 | -6 | -6  | 0.66  | 0.25       |
| - | 9  | 6   | 5     | 16.25 0.69 |
| 9 | 6  | -5  | 16.35 | 0.86       |
| 9 | -6 | -5  | 16.71 | 0.70       |
| - | 9  | -6  | 5     | 17.33 0.67 |
| 9 | -6 | -5  | 16.84 | 0.78       |
| - | 9  | 6   | 4     | 5.06 0.36  |
| 9 | 6  | -4  | 5.00  | 0.50       |
| 9 | -6 | -4  | 4.64  | 0.36       |
| - | 9  | -6  | 4     | 5.05 0.33  |
| 9 | -6 | -4  | 4.36  | 0.33       |
| - | 9  | 6   | 3     | 25.47 0.98 |
| 9 | 6  | -3  | 26.32 | 1.20       |
| 9 | -6 | -3  | 25.30 | 0.94       |
| - | 9  | -6  | 3     | 24.89 0.97 |
| 9 | -6 | -3  | 23.70 | 1.11       |
| 9 | 6  | -2  | 0.85  | 0.29       |
| - | 9  | 6   | 2     | 1.09 0.20  |
| - | 9  | -6  | 2     | 0.66 0.19  |
| 9 | -6 | -2  | 1.04  | 0.24       |
| 9 | -6 | -2  | 0.81  | 0.20       |
| - | 9  | 6   | 1     | 10.64 0.50 |
| 9 | 6  | -1  | 9.69  | 0.63       |
| 9 | -6 | -1  | 10.63 | 0.47       |
| 9 | -6 | -1  | 10.04 | 0.56       |
| - | 9  | -6  | 1     | 9.71 0.49  |
| 9 | 6  | 0   | -0.35 | 0.31       |
| - | 9  | 6   | 0     | 0.25 0.21  |
| 9 | -6 | 0   | 0.37  | 0.26       |
| 9 | -6 | 0   | 0.55  | 0.18       |
| - | 9  | -6  | 0     | 0.19 0.19  |
| 9 | 6  | 1   | 1.29  | 0.34       |
| - | 9  | 6   | -1    | 0.80 0.25  |
| - | 9  | -6  | -1    | 1.47 0.21  |
| 9 | -6 | 1   | 1.70  | 0.20       |
| 9 | -6 | 1   | 1.50  | 0.30       |
| - | 9  | 6   | -2    | -0.50 0.24 |
| 9 | 6  | 2   | -0.05 | 0.29       |

|   |   |    |     |       |      |
|---|---|----|-----|-------|------|
| - | 9 | -6 | -2  | 0.06  | 0.23 |
|   | 9 | -6 | 2   | 0.07  | 0.29 |
| - | 9 | 6  | -3  | 4.24  | 0.45 |
|   | 9 | 6  | 3   | 4.31  | 0.52 |
|   | 9 | -6 | 3   | 4.88  | 0.48 |
| - | 9 | -6 | -3  | 4.72  | 0.40 |
|   | 9 | 6  | 4   | 0.49  | 0.33 |
| - | 9 | 6  | -4  | 0.17  | 0.26 |
| - | 9 | -6 | -4  | 0.43  | 0.26 |
|   | 9 | -6 | 4   | 0.32  | 0.30 |
|   | 9 | 6  | 5   | 2.29  | 0.36 |
| - | 9 | 6  | -5  | 1.50  | 0.33 |
| - | 9 | -6 | -5  | 1.95  | 0.28 |
|   | 9 | -6 | 5   | 1.70  | 0.37 |
|   | 9 | 6  | 6   | 3.98  | 0.51 |
| - | 9 | 6  | -6  | 3.05  | 0.40 |
|   | 9 | -6 | 6   | 3.65  | 0.46 |
| - | 9 | -6 | -6  | 4.05  | 0.46 |
| - | 9 | 6  | -7  | -0.06 | 0.33 |
|   | 9 | 6  | 7   | 0.84  | 0.35 |
| - | 9 | -6 | -7  | 0.48  | 0.32 |
|   | 9 | -6 | 7   | 0.86  | 0.39 |
|   | 9 | 6  | 8   | 2.34  | 0.40 |
| - | 9 | -6 | -8  | 2.16  | 0.38 |
|   | 9 | -6 | 8   | 2.05  | 0.44 |
| - | 9 | 6  | -9  | 0.10  | 0.31 |
| - | 9 | -6 | -9  | 0.08  | 0.37 |
|   | 9 | -6 | 9   | 0.29  | 0.44 |
| - | 9 | 6  | -10 | 0.50  | 0.34 |
| - | 9 | -6 | -10 | 0.08  | 0.41 |
|   | 9 | 7  | -14 | 0.44  | 0.42 |
|   | 9 | 7  | -13 | 0.19  | 0.40 |
|   | 9 | -7 | -13 | -0.11 | 0.36 |
|   | 9 | 7  | -12 | 0.06  | 0.38 |
|   | 9 | -7 | -12 | -0.38 | 0.38 |
|   | 9 | 7  | -11 | 1.48  | 0.39 |
|   | 9 | -7 | -11 | 1.32  | 0.36 |
|   | 9 | 7  | -10 | 1.57  | 0.38 |
|   | 9 | -7 | -10 | 1.90  | 0.36 |
|   | 9 | 7  | -9  | 2.84  | 0.37 |
|   | 9 | -7 | -9  | 3.16  | 0.33 |
| - | 9 | 7  | 8   | -0.10 | 0.21 |
|   | 9 | 7  | -8  | 0.02  | 0.32 |
|   | 9 | -7 | -8  | -0.13 | 0.28 |
|   | 9 | 7  | -7  | 0.29  | 0.29 |
| - | 9 | 7  | 7   | 0.21  | 0.20 |
|   | 9 | -7 | -7  | 0.10  | 0.24 |
|   | 9 | 7  | -6  | 10.54 | 0.66 |
| - | 9 | 7  | 6   | 10.43 | 0.51 |
|   | 9 | -7 | -6  | 11.03 | 0.55 |
| - | 9 | 7  | 5   | 6.07  | 0.39 |
|   | 9 | 7  | -5  | 6.35  | 0.53 |
|   | 9 | -7 | -5  | 5.57  | 0.38 |
| - | 9 | -7 | 5   | 6.06  | 0.33 |

|   |   |    |    |       |      |
|---|---|----|----|-------|------|
| - | 9 | 7  | 4  | 0.29  | 0.20 |
|   | 9 | 7  | -4 | 0.36  | 0.28 |
| - | 9 | -7 | 4  | 0.20  | 0.17 |
|   | 9 | -7 | -4 | -0.16 | 0.21 |
|   | 9 | -7 | -4 | 0.15  | 0.19 |
|   | 9 | 7  | -3 | 0.68  | 0.32 |
| - | 9 | 7  | 3  | 0.66  | 0.21 |
| - | 9 | -7 | 3  | 0.55  | 0.19 |
|   | 9 | -7 | -3 | 0.76  | 0.20 |
|   | 9 | -7 | -3 | 0.71  | 0.22 |
| - | 9 | 7  | 2  | 0.68  | 0.22 |
|   | 9 | 7  | -2 | 0.76  | 0.33 |
|   | 9 | -7 | -2 | 0.70  | 0.23 |
| - | 9 | -7 | 2  | 0.68  | 0.19 |
|   | 9 | -7 | -2 | 0.65  | 0.21 |
| - | 9 | 7  | 1  | 4.95  | 0.40 |
|   | 9 | 7  | -1 | 4.35  | 0.53 |
| - | 9 | -7 | 1  | 4.70  | 0.32 |
|   | 9 | -7 | -1 | 5.63  | 0.36 |
|   | 9 | -7 | -1 | 4.90  | 0.42 |
|   | 9 | 7  | 0  | 2.64  | 0.37 |
| - | 9 | 7  | 0  | 3.61  | 0.39 |
| - | 9 | -7 | 0  | 3.15  | 0.34 |
|   | 9 | -7 | 0  | 3.10  | 0.39 |
|   | 9 | -7 | 0  | 3.39  | 0.33 |
|   | 9 | 7  | 1  | 1.93  | 0.37 |
| - | 9 | 7  | -1 | 2.68  | 0.29 |
|   | 9 | -7 | 1  | 2.60  | 0.32 |
| - | 9 | -7 | -1 | 2.89  | 0.30 |
|   | 9 | -7 | 1  | 2.95  | 0.33 |
|   | 9 | 7  | 2  | 0.36  | 0.34 |
| - | 9 | 7  | -2 | 0.68  | 0.27 |
|   | 9 | -7 | 2  | 1.10  | 0.31 |
| - | 9 | -7 | -2 | 0.96  | 0.24 |
| - | 9 | 7  | -3 | 2.03  | 0.30 |
|   | 9 | 7  | 3  | 2.34  | 0.37 |
|   | 9 | -7 | 3  | 2.38  | 0.35 |
| - | 9 | -7 | -3 | 2.76  | 0.28 |
| - | 9 | 7  | -4 | -0.50 | 0.27 |
|   | 9 | 7  | 4  | 0.08  | 0.32 |
| - | 9 | -7 | -4 | 0.32  | 0.24 |
|   | 9 | -7 | 4  | 0.49  | 0.33 |
| - | 9 | 7  | -5 | -0.74 | 0.29 |
|   | 9 | 7  | 5  | -0.08 | 0.33 |
| - | 9 | -7 | -5 | -0.22 | 0.27 |
|   | 9 | -7 | 5  | 0.10  | 0.31 |
| - | 9 | 7  | -6 | -0.69 | 0.30 |
|   | 9 | 7  | 6  | 0.13  | 0.34 |
|   | 9 | -7 | 6  | 0.52  | 0.38 |
| - | 9 | -7 | -6 | 0.07  | 0.27 |
| - | 9 | 7  | -7 | 0.21  | 0.34 |
|   | 9 | 7  | 7  | 1.18  | 0.37 |
|   | 9 | -7 | 7  | 1.16  | 0.41 |
| - | 9 | -7 | -7 | 0.73  | 0.32 |

|   |    |     |       |       |      |
|---|----|-----|-------|-------|------|
| 9 | 7  | 8   | 3.14  | 0.44  |      |
| 9 | -7 | 8   | 2.29  | 0.42  |      |
| - | 9  | -7  | -8    | 2.48  | 0.38 |
| - | 9  | -7  | -9    | 0.22  | 0.37 |
| 9 | -7 | 9   | 0.69  | 0.45  |      |
| 9 | 8  | -13 | 1.06  | 0.43  |      |
| 9 | -8 | -13 | 0.89  | 0.42  |      |
| 9 | 8  | -12 | 0.18  | 0.40  |      |
| 9 | -8 | -12 | -0.29 | 0.38  |      |
| 9 | 8  | -11 | 0.02  | 0.38  |      |
| 9 | -8 | -11 | -0.29 | 0.32  |      |
| 9 | 8  | -10 | 3.03  | 0.43  |      |
| 9 | -8 | -10 | 3.38  | 0.38  |      |
| 9 | 8  | -9  | 6.63  | 0.55  |      |
| 9 | -8 | -9  | 7.00  | 0.48  |      |
| 9 | 8  | -8  | -0.16 | 0.31  |      |
| - | 9  | 8   | 8     | -0.23 | 0.21 |
| 9 | -8 | -8  | -0.15 | 0.26  |      |
| 9 | 8  | -7  | 9.87  | 0.63  |      |
| - | 9  | 8   | 7     | 9.60  | 0.50 |
| 9 | -8 | -7  | 10.96 | 0.56  |      |
| - | 9  | 8   | 6     | 0.06  | 0.21 |
| 9 | 8  | -6  | 0.17  | 0.31  |      |
| 9 | -8 | -6  | 0.03  | 0.25  |      |
| - | 9  | 8   | 5     | 0.15  | 0.21 |
| 9 | 8  | -5  | 0.49  | 0.32  |      |
| - | 9  | -8  | 5     | 0.37  | 0.18 |
| 9 | -8 | -5  | 0.09  | 0.24  |      |
| 9 | 8  | -4  | 0.49  | 0.33  |      |
| - | 9  | 8   | 4     | 0.42  | 0.21 |
| 9 | -8 | -4  | 0.07  | 0.23  |      |
| - | 9  | -8  | 4     | 0.50  | 0.19 |
| 9 | 8  | -3  | 1.57  | 0.35  |      |
| - | 9  | 8   | 3     | 1.48  | 0.23 |
| 9 | -8 | -3  | 1.56  | 0.23  |      |
| - | 9  | -8  | 3     | 1.53  | 0.20 |
| 9 | -8 | -3  | 1.14  | 0.23  |      |
| 9 | 8  | -2  | 1.84  | 0.34  |      |
| - | 9  | 8   | 2     | 1.95  | 0.25 |
| 9 | -8 | -2  | 1.74  | 0.23  |      |
| - | 9  | -8  | 2     | 1.87  | 0.22 |
| 9 | -8 | -2  | 1.96  | 0.25  |      |
| - | 9  | 8   | 1     | 2.11  | 0.24 |
| 9 | 8  | -1  | 1.84  | 0.37  |      |
| - | 9  | -8  | 1     | 1.89  | 0.23 |
| 9 | -8 | -1  | 1.96  | 0.21  |      |
| 9 | -8 | -1  | 1.62  | 0.27  |      |
| - | 9  | 8   | 0     | 2.83  | 0.34 |
| 9 | 8  | 0   | 2.32  | 0.36  |      |
| 9 | -8 | 0   | 3.11  | 0.41  |      |
| - | 9  | -8  | 0     | 2.73  | 0.33 |
| 9 | -8 | 0   | 2.57  | 0.23  |      |
| - | 9  | 8   | -1    | 8.11  | 0.47 |
| 9 | 8  | 1   | 6.14  | 0.63  |      |

|   |    |     |       |       |      |
|---|----|-----|-------|-------|------|
| 9 | -8 | 1   | 8.17  | 0.44  |      |
| - | 9  | -8  | -1    | 8.18  | 0.42 |
| 9 | -8 | 1   | 8.16  | 0.52  |      |
| - | 9  | 8   | -2    | 1.39  | 0.26 |
| 9 | 8  | 2   | 0.59  | 0.35  |      |
| 9 | -8 | 2   | 1.29  | 0.31  |      |
| - | 9  | -8  | -2    | 1.23  | 0.23 |
| - | 9  | 8   | -3    | -0.20 | 0.25 |
| 9 | 8  | 3   | -0.77 | 0.33  |      |
| 9 | -8 | 3   | 0.14  | 0.31  |      |
| - | 9  | -8  | -3    | 0.26  | 0.25 |
| - | 9  | 8   | -4    | -0.46 | 0.28 |
| 9 | 8  | 4   | -0.36 | 0.34  |      |
| 9 | -8 | 4   | 0.17  | 0.33  |      |
| - | 9  | -8  | -4    | 0.12  | 0.26 |
| 9 | 8  | 5   | 1.73  | 0.37  |      |
| - | 9  | 8   | -5    | 0.92  | 0.31 |
| - | 9  | -8  | -5    | 1.88  | 0.30 |
| 9 | -8 | 5   | 1.69  | 0.38  |      |
| - | 9  | 8   | -6    | -0.59 | 0.31 |
| 9 | 8  | 6   | 0.49  | 0.35  |      |
| 9 | -8 | 6   | 0.53  | 0.38  |      |
| - | 9  | -8  | -6    | 0.60  | 0.29 |
| 9 | 8  | 7   | 4.30  | 0.61  |      |
| 9 | -8 | 7   | 4.22  | 0.57  |      |
| - | 9  | -8  | -7    | 4.48  | 0.45 |
| - | 9  | -8  | -8    | 0.90  | 0.36 |
| 9 | -8 | 8   | 0.67  | 0.40  |      |
| - | 9  | -8  | -9    | 0.42  | 0.39 |
| 9 | 9  | -13 | 2.71  | 0.48  |      |
| 9 | 9  | -12 | 0.15  | 0.42  |      |
| 9 | -9 | -12 | -0.10 | 0.39  |      |
| 9 | 9  | -11 | 1.64  | 0.43  |      |
| 9 | -9 | -11 | 1.81  | 0.38  |      |
| 9 | 9  | -10 | 8.37  | 0.68  |      |
| 9 | -9 | -10 | 9.35  | 0.59  |      |
| 9 | 9  | -9  | 0.21  | 0.34  |      |
| 9 | -9 | -9  | 0.47  | 0.32  |      |
| 9 | 9  | -8  | 0.30  | 0.37  |      |
| 9 | -9 | -8  | 0.29  | 0.29  |      |
| - | 9  | 9   | 7     | 0.34  | 0.22 |
| 9 | 9  | -7  | 0.68  | 0.32  |      |
| 9 | -9 | -7  | 0.83  | 0.26  |      |
| - | 9  | 9   | 6     | 3.87  | 0.37 |
| 9 | 9  | -6  | 4.43  | 0.52  |      |
| 9 | -9 | -6  | 4.35  | 0.42  |      |
| - | 9  | 9   | 5     | 0.26  | 0.20 |
| 9 | 9  | -5  | 0.18  | 0.33  |      |
| 9 | -9 | -5  | -0.22 | 0.23  |      |
| 9 | 9  | -4  | 0.08  | 0.30  |      |
| - | 9  | 9   | 4     | 0.22  | 0.20 |
| 9 | -9 | -4  | -0.07 | 0.24  |      |
| - | 9  | -9  | 4     | 0.21  | 0.19 |
| - | 9  | 9   | 3     | 0.47  | 0.21 |

|   |     |     |       |       |
|---|-----|-----|-------|-------|
| 9 | 9   | -3  | 0.29  | 0.35  |
| - | 9   | -9  | 3     | 0.35  |
| 9 | -9  | -3  | 0.21  | 0.21  |
| - | 9   | 9   | 2     | 4.77  |
| 9 | 9   | -2  | 4.88  | 0.56  |
| 9 | -9  | -2  | 4.51  | 0.39  |
| - | 9   | -9  | 2     | 4.51  |
| 9 | -9  | -2  | 4.29  | 0.38  |
| 9 | 9   | -1  | 2.33  | 0.39  |
| - | 9   | 9   | 1     | 1.81  |
| 9 | -9  | -1  | 1.52  | 0.26  |
| - | 9   | -9  | 1     | 1.55  |
| 9 | -9  | -1  | 1.54  | 0.24  |
| 9 | 9   | 0   | 5.48  | 0.61  |
| - | 9   | 9   | 0     | 7.12  |
| - | 9   | -9  | 0     | 6.74  |
| 9 | -9  | 0   | 6.67  | 0.47  |
| 9 | -9  | 0   | 6.88  | 0.39  |
| - | 9   | 9   | -1    | 0.05  |
| 9 | 9   | 1   | -0.82 | 0.33  |
| 9 | -9  | 1   | 0.15  | 0.28  |
| - | 9   | -9  | -1    | -0.05 |
| 9 | -9  | 1   | -0.18 | 0.22  |
| - | 9   | 9   | -2    | -0.14 |
| - | 9   | -9  | -2    | 0.08  |
| 9 | -9  | 2   | -0.17 | 0.29  |
| 9 | 9   | 3   | -0.08 | 0.36  |
| - | 9   | 9   | -3    | 0.77  |
| - | 9   | -9  | -3    | 0.87  |
| 9 | -9  | 3   | 0.92  | 0.32  |
| 9 | 9   | 4   | 0.25  | 0.36  |
| - | 9   | 9   | -4    | 0.16  |
| 9 | -9  | 4   | 0.83  | 0.34  |
| - | 9   | -9  | -4    | 0.31  |
| 9 | 9   | 5   | 2.11  | 0.40  |
| - | 9   | 9   | -5    | 1.22  |
| - | 9   | -9  | -5    | 1.70  |
| 9 | -9  | 5   | 1.51  | 0.38  |
| 9 | 9   | 6   | 0.36  | 0.36  |
| - | 9   | 9   | -6    | -0.36 |
| - | 9   | -9  | -6    | 0.48  |
| 9 | -9  | 6   | 0.84  | 0.39  |
| - | 9   | -9  | -7    | 0.54  |
| 9 | -9  | 7   | 0.71  | 0.41  |
| 9 | -9  | 8   | 2.30  | 0.47  |
| - | 9   | -9  | -8    | 2.31  |
| 9 | 10  | -12 | 0.58  | 0.45  |
| 9 | -10 | -12 | 0.60  | 0.40  |
| 9 | 10  | -11 | 0.49  | 0.39  |
| 9 | -10 | -11 | 0.62  | 0.37  |
| 9 | 10  | -10 | 0.23  | 0.41  |
| 9 | -10 | -10 | -0.09 | 0.33  |
| 9 | 10  | -9  | 0.38  | 0.39  |
| 9 | -10 | -9  | 0.18  | 0.32  |

|   |     |     |       |            |
|---|-----|-----|-------|------------|
| 9 | 10  | -8  | 2.52  | 0.43       |
| 9 | -10 | -8  | 3.12  | 0.34       |
| - | 9   | 10  | 7     | 0.75 0.24  |
| 9 | 10  | -7  | 0.50  | 0.33       |
| 9 | -10 | -7  | 0.54  | 0.29       |
| 9 | 10  | -6  | 1.25  | 0.35       |
| - | 9   | 10  | 6     | 1.03 0.24  |
| 9 | -10 | -6  | 1.41  | 0.28       |
| - | 9   | 10  | 5     | 7.78 0.46  |
| 9 | 10  | -5  | 7.54  | 0.62       |
| 9 | -10 | -5  | 7.41  | 0.48       |
| 9 | 10  | -4  | -0.09 | 0.34       |
| - | 9   | 10  | 4     | -0.09 0.21 |
| - | 9   | -10 | 4     | 0.21 0.18  |
| 9 | -10 | -4  | 0.01  | 0.24       |
| - | 9   | 10  | 3     | 10.25 0.52 |
| 9 | 10  | -3  | 10.52 | 0.71       |
| 9 | -10 | -3  | 10.40 | 0.53       |
| - | 9   | -10 | 3     | 10.73 0.49 |
| - | 9   | 10  | 2     | 3.03 0.34  |
| 9 | 10  | -2  | 2.63  | 0.40       |
| 9 | -10 | -2  | 2.64  | 0.27       |
| - | 9   | -10 | 2     | 2.96 0.32  |
| - | 9   | 10  | 1     | 4.08 0.37  |
| 9 | 10  | -1  | 3.69  | 0.45       |
| 9 | -10 | -1  | 4.13  | 0.41       |
| 9 | -10 | -1  | 3.90  | 0.33       |
| - | 9   | -10 | 1     | 3.86 0.35  |
| 9 | 10  | 0   | -0.70 | 0.35       |
| - | 9   | 10  | 0     | 0.07 0.25  |
| 9 | -10 | 0   | 0.02  | 0.26       |
| 9 | -10 | 0   | 0.28  | 0.21       |
| - | 9   | -10 | 0     | 0.04 0.22  |
| - | 9   | 10  | -1    | 0.37 0.24  |
| - | 9   | -10 | -1    | 0.48 0.22  |
| 9 | -10 | 1   | 0.47  | 0.29       |
| 9 | -10 | 1   | 0.17  | 0.23       |
| 9 | 10  | 2   | 0.60  | 0.38       |
| - | 9   | 10  | -2    | 1.86 0.28  |
| - | 9   | -10 | -2    | 2.00 0.26  |
| 9 | -10 | 2   | 1.96  | 0.33       |
| - | 9   | 10  | -3    | 0.79 0.29  |
| 9 | 10  | 3   | -0.28 | 0.37       |
| 9 | -10 | 3   | 1.16  | 0.33       |
| - | 9   | -10 | -3    | 0.86 0.25  |
| - | 9   | 10  | -4    | -0.02 0.29 |
| 9 | 10  | 4   | -0.46 | 0.36       |
| 9 | -10 | 4   | 0.06  | 0.34       |
| - | 9   | -10 | -4    | 0.25 0.28  |
| - | 9   | 10  | -5    | 3.16 0.36  |
| 9 | 10  | 5   | 3.64  | 0.45       |
| - | 9   | -10 | -5    | 4.04 0.46  |
| 9 | -10 | 5   | 4.00  | 0.52       |
| 9 | 10  | 6   | 0.04  | 0.37       |

|   |   |     |     |       |      |
|---|---|-----|-----|-------|------|
| - | 9 | 10  | -6  | -0.09 | 0.32 |
|   | 9 | -10 | 6   | 0.45  | 0.38 |
| - | 9 | -10 | -6  | 0.39  | 0.29 |
|   | 9 | -10 | 7   | 0.43  | 0.42 |
| - | 9 | -10 | -7  | 0.36  | 0.34 |
|   | 9 | -10 | 8   | 0.23  | 0.40 |
| - | 9 | -10 | -8  | 0.15  | 0.37 |
|   | 9 | 11  | -12 | 0.88  | 0.43 |
|   | 9 | -11 | -12 | 0.39  | 0.40 |
|   | 9 | 11  | -11 | 0.18  | 0.45 |
|   | 9 | -11 | -11 | 0.23  | 0.38 |
|   | 9 | 11  | -10 | 1.95  | 0.45 |
|   | 9 | -11 | -10 | 1.59  | 0.38 |
|   | 9 | 11  | -9  | 0.13  | 0.41 |
|   | 9 | -11 | -9  | 0.35  | 0.31 |
|   | 9 | 11  | -8  | 0.11  | 0.36 |
|   | 9 | -11 | -8  | 0.04  | 0.28 |
|   | 9 | 11  | -7  | 0.95  | 0.39 |
|   | 9 | -11 | -7  | 0.76  | 0.27 |
| - | 9 | 11  | 6   | 4.39  | 0.41 |
|   | 9 | 11  | -6  | 5.22  | 0.57 |
|   | 9 | -11 | -6  | 4.68  | 0.45 |
| - | 9 | 11  | 5   | -0.01 | 0.24 |
|   | 9 | 11  | -5  | 0.59  | 0.33 |
|   | 9 | -11 | -5  | 0.08  | 0.24 |
|   | 9 | 11  | -4  | 2.83  | 0.41 |
| - | 9 | 11  | 4   | 2.45  | 0.29 |
|   | 9 | -11 | -4  | 2.18  | 0.28 |
| - | 9 | -11 | 4   | 2.82  | 0.32 |
|   | 9 | 11  | -3  | -0.17 | 0.36 |
| - | 9 | 11  | 3   | -0.26 | 0.24 |
| - | 9 | -11 | 3   | 0.00  | 0.20 |
|   | 9 | -11 | -3  | 0.12  | 0.25 |
| - | 9 | 11  | 2   | 0.17  | 0.26 |
|   | 9 | 11  | -2  | 0.03  | 0.37 |
| - | 9 | -11 | 2   | -0.07 | 0.21 |
|   | 9 | -11 | -2  | -0.12 | 0.22 |
|   | 9 | 11  | -1  | 8.58  | 0.68 |
| - | 9 | 11  | 1   | 8.85  | 0.52 |
|   | 9 | -11 | -1  | 8.25  | 0.45 |
| - | 9 | -11 | 1   | 8.33  | 0.46 |
|   | 9 | 11  | 0   | -0.11 | 0.37 |
| - | 9 | 11  | 0   | 0.59  | 0.27 |
|   | 9 | -11 | 0   | 0.38  | 0.25 |
|   | 9 | -11 | 0   | 0.45  | 0.27 |
| - | 9 | -11 | 0   | 0.44  | 0.24 |
|   | 9 | 11  | 1   | 2.27  | 0.42 |
| - | 9 | 11  | -1  | 3.12  | 0.33 |
|   | 9 | -11 | 1   | 3.33  | 0.30 |
|   | 9 | -11 | 1   | 3.66  | 0.44 |
| - | 9 | -11 | -1  | 3.55  | 0.38 |
| - | 9 | 11  | -2  | 0.32  | 0.26 |
|   | 9 | -11 | 2   | 0.26  | 0.26 |
| - | 9 | -11 | -2  | 0.38  | 0.24 |

|   |     |     |       |       |      |
|---|-----|-----|-------|-------|------|
| 9 | -11 | 2   | 0.71  | 0.31  |      |
| - | 9   | 11  | -3    | 0.01  | 0.28 |
| - | 9   | -11 | -3    | 0.10  | 0.25 |
| 9 | -11 | 3   | 0.54  | 0.33  |      |
| - | 9   | 11  | -4    | 4.10  | 0.50 |
| 9 | 11  | 4   | 4.10  | 0.47  |      |
| 9 | -11 | 4   | 5.00  | 0.51  |      |
| - | 9   | -11 | -4    | 5.37  | 0.46 |
| 9 | 11  | 5   | -0.81 | 0.37  |      |
| - | 9   | 11  | -5    | 0.03  | 0.31 |
| 9 | -11 | 5   | 0.30  | 0.34  |      |
| - | 9   | -11 | -5    | 0.23  | 0.31 |
| - | 9   | 11  | -6    | -0.09 | 0.32 |
| - | 9   | -11 | -6    | 0.17  | 0.32 |
| 9 | -11 | 6   | 0.38  | 0.39  |      |
| 9 | -11 | 7   | 0.50  | 0.43  |      |
| - | 9   | -11 | -7    | 0.64  | 0.35 |
| 9 | 12  | -11 | 1.27  | 0.48  |      |
| 9 | -12 | -11 | 1.44  | 0.40  |      |
| 9 | 12  | -10 | -0.08 | 0.45  |      |
| 9 | -12 | -10 | -0.05 | 0.33  |      |
| 9 | 12  | -9  | 1.26  | 0.45  |      |
| 9 | -12 | -9  | 1.28  | 0.35  |      |
| 9 | 12  | -8  | 2.03  | 0.41  |      |
| 9 | -12 | -8  | 1.99  | 0.32  |      |
| 9 | 12  | -7  | 6.57  | 0.65  |      |
| 9 | -12 | -7  | 6.83  | 0.46  |      |
| 9 | 12  | -6  | 0.44  | 0.39  |      |
| - | 9   | 12  | 6     | 0.15  | 0.26 |
| 9 | -12 | -6  | 0.37  | 0.26  |      |
| - | 9   | 12  | 5     | 0.53  | 0.24 |
| 9 | 12  | -5  | 0.78  | 0.36  |      |
| 9 | -12 | -5  | 0.59  | 0.28  |      |
| 9 | 12  | -4  | 0.56  | 0.37  |      |
| - | 9   | 12  | 4     | 0.37  | 0.25 |
| 9 | -12 | -4  | 0.19  | 0.24  |      |
| - | 9   | -12 | 4     | 0.65  | 0.21 |
| 9 | 12  | -3  | -0.06 | 0.37  |      |
| - | 9   | 12  | 3     | 0.10  | 0.24 |
| 9 | -12 | -3  | 0.05  | 0.23  |      |
| - | 9   | -12 | 3     | 0.21  | 0.21 |
| - | 9   | 12  | 2     | 0.57  | 0.27 |
| 9 | 12  | -2  | 0.18  | 0.38  |      |
| 9 | -12 | -2  | 0.32  | 0.23  |      |
| - | 9   | -12 | 2     | 0.56  | 0.24 |
| - | 9   | 12  | 1     | 2.35  | 0.29 |
| 9 | 12  | -1  | 2.36  | 0.42  |      |
| - | 9   | -12 | 1     | 2.17  | 0.26 |
| 9 | -12 | -1  | 2.15  | 0.26  |      |
| - | 9   | 12  | 0     | 0.44  | 0.26 |
| 9 | 12  | 0   | -0.05 | 0.37  |      |
| 9 | -12 | 0   | 0.20  | 0.23  |      |
| - | 9   | -12 | 0     | 0.38  | 0.25 |
| - | 9   | 12  | -1    | 1.18  | 0.30 |

|   |     |     |       |       |      |
|---|-----|-----|-------|-------|------|
| 9 | 12  | 1   | 0.01  | 0.39  |      |
| 9 | -12 | 1   | 1.19  | 0.30  |      |
| 9 | -12 | 1   | 0.96  | 0.27  |      |
| - | 9   | -12 | -1    | 1.02  | 0.25 |
| - | 9   | 12  | -2    | 0.19  | 0.26 |
| - | 9   | -12 | -2    | 0.38  | 0.27 |
| 9 | -12 | 2   | 0.55  | 0.33  |      |
| 9 | -12 | 2   | 0.15  | 0.27  |      |
| - | 9   | 12  | -3    | 0.38  | 0.30 |
| 9 | -12 | 3   | 0.31  | 0.33  |      |
| - | 9   | -12 | -3    | 0.43  | 0.28 |
| - | 9   | 12  | -4    | 0.13  | 0.28 |
| - | 9   | -12 | -4    | 0.11  | 0.27 |
| 9 | -12 | 4   | 0.44  | 0.35  |      |
| - | 9   | 12  | -5    | 0.28  | 0.32 |
| 9 | -12 | 5   | 0.51  | 0.37  |      |
| - | 9   | -12 | -5    | 0.44  | 0.29 |
| 9 | -12 | 6   | 0.77  | 0.40  |      |
| - | 9   | -12 | -6    | 0.65  | 0.34 |
| - | 9   | -12 | -7    | 0.02  | 0.32 |
| 9 | -12 | 7   | -0.07 | 0.43  |      |
| 9 | 13  | -10 | 0.63  | 0.48  |      |
| 9 | -13 | -10 | 0.73  | 0.35  |      |
| 9 | 13  | -9  | -0.03 | 0.45  |      |
| 9 | -13 | -9  | 0.46  | 0.35  |      |
| 9 | 13  | -8  | 0.20  | 0.39  |      |
| 9 | -13 | -8  | 0.04  | 0.30  |      |
| 9 | 13  | -7  | 0.48  | 0.40  |      |
| 9 | -13 | -7  | 0.63  | 0.32  |      |
| 9 | 13  | -6  | -0.16 | 0.37  |      |
| 9 | -13 | -6  | -0.10 | 0.30  |      |
| - | 9   | 13  | 5     | 1.23  | 0.26 |
| 9 | 13  | -5  | 1.46  | 0.41  |      |
| 9 | -13 | -5  | 1.10  | 0.30  |      |
| 9 | 13  | -4  | 0.14  | 0.39  |      |
| - | 9   | 13  | 4     | 0.01  | 0.26 |
| 9 | -13 | -4  | 0.06  | 0.28  |      |
| 9 | 13  | -3  | 0.05  | 0.38  |      |
| - | 9   | 13  | 3     | -0.07 | 0.24 |
| - | 9   | -13 | 3     | 0.19  | 0.22 |
| 9 | -13 | -3  | 0.06  | 0.27  |      |
| 9 | 13  | -2  | 3.17  | 0.45  |      |
| - | 9   | 13  | 2     | 3.44  | 0.34 |
| 9 | -13 | -2  | 3.74  | 0.41  |      |
| - | 9   | -13 | 2     | 3.54  | 0.36 |
| 9 | 13  | -1  | 0.95  | 0.40  |      |
| - | 9   | 13  | 1     | 1.33  | 0.30 |
| 9 | -13 | -1  | 1.15  | 0.28  |      |
| - | 9   | -13 | 1     | 1.61  | 0.26 |
| 9 | 13  | 0   | 10.89 | 0.79  |      |
| - | 9   | 13  | 0     | 12.18 | 0.64 |
| 9 | -13 | 0   | 11.87 | 0.59  |      |
| - | 9   | -13 | 0     | 12.69 | 0.59 |
| - | 9   | 13  | -1    | 1.88  | 0.32 |

|   |     |     |       |       |      |
|---|-----|-----|-------|-------|------|
| 9 | 13  | 1   | 1.09  | 0.43  |      |
| - | 9   | -13 | -1    | 2.20  | 0.30 |
| 9 | -13 | 1   | 1.83  | 0.30  |      |
| 9 | 13  | 2   | -0.80 | 0.38  |      |
| - | 9   | 13  | -2    | 0.21  | 0.30 |
| 9 | -13 | 2   | -0.15 | 0.26  |      |
| - | 9   | -13 | -2    | 0.34  | 0.26 |
| 9 | -13 | 2   | 0.31  | 0.31  |      |
| 9 | 13  | 3   | 1.06  | 0.44  |      |
| - | 9   | 13  | -3    | 2.10  | 0.31 |
| 9 | -13 | 3   | 2.48  | 0.39  |      |
| - | 9   | -13 | -3    | 2.23  | 0.30 |
| - | 9   | 13  | -4    | 0.03  | 0.31 |
| 9 | -13 | 4   | 0.15  | 0.36  |      |
| - | 9   | -13 | -4    | 0.33  | 0.31 |
| - | 9   | 13  | -5    | 0.64  | 0.33 |
| 9 | -13 | 5   | 1.07  | 0.40  |      |
| - | 9   | -13 | -5    | 1.04  | 0.31 |
| 9 | -13 | 6   | 0.51  | 0.42  |      |
| - | 9   | -13 | -6    | 0.44  | 0.35 |
| 9 | 14  | -10 | 0.31  | 0.48  |      |
| 9 | -14 | -10 | 0.03  | 0.38  |      |
| 9 | 14  | -9  | 0.35  | 0.48  |      |
| 9 | -14 | -9  | 0.76  | 0.34  |      |
| 9 | 14  | -8  | 0.35  | 0.41  |      |
| 9 | -14 | -8  | 0.51  | 0.35  |      |
| 9 | 14  | -7  | 1.39  | 0.47  |      |
| 9 | -14 | -7  | 1.62  | 0.32  |      |
| 9 | 14  | -6  | 1.75  | 0.42  |      |
| 9 | -14 | -6  | 1.96  | 0.33  |      |
| 9 | 14  | -5  | 0.97  | 0.42  |      |
| 9 | -14 | -5  | 0.75  | 0.31  |      |
| 9 | 14  | -4  | 2.81  | 0.46  |      |
| - | 9   | 14  | 4     | 2.74  | 0.32 |
| 9 | -14 | -4  | 2.68  | 0.30  |      |
| 9 | 14  | -3  | 0.85  | 0.40  |      |
| - | 9   | 14  | 3     | 0.92  | 0.29 |
| - | 9   | -14 | 3     | 1.07  | 0.24 |
| 9 | -14 | -3  | 1.04  | 0.29  |      |
| 9 | 14  | -2  | 1.30  | 0.42  |      |
| - | 9   | 14  | 2     | 1.58  | 0.31 |
| 9 | -14 | -2  | 1.71  | 0.28  |      |
| - | 9   | -14 | 2     | 1.67  | 0.26 |
| - | 9   | 14  | 1     | -0.06 | 0.29 |
| 9 | 14  | -1  | -0.11 | 0.38  |      |
| 9 | -14 | -1  | -0.01 | 0.25  |      |
| - | 9   | -14 | 1     | 0.12  | 0.25 |
| 9 | 14  | 0   | 0.12  | 0.39  |      |
| - | 9   | 14  | 0     | 0.59  | 0.31 |
| 9 | -14 | 0   | 0.99  | 0.29  |      |
| - | 9   | -14 | 0     | 0.84  | 0.27 |
| 9 | 14  | 1   | 0.26  | 0.40  |      |
| - | 9   | 14  | -1    | 1.06  | 0.32 |
| 9 | -14 | 1   | 0.65  | 0.30  |      |

|   |   |     |    |       |      |
|---|---|-----|----|-------|------|
| - | 9 | -14 | -1 | 1.28  | 0.29 |
| - | 9 | 14  | -2 | 0.22  | 0.31 |
|   | 9 | 14  | 2  | -0.36 | 0.42 |
| - | 9 | -14 | -2 | 0.53  | 0.27 |
|   | 9 | -14 | 2  | 0.44  | 0.30 |
| - | 9 | 14  | -3 | 0.04  | 0.32 |
|   | 9 | -14 | 3  | -0.11 | 0.29 |
| - | 9 | -14 | -3 | -0.10 | 0.28 |
|   | 9 | -14 | 3  | 0.45  | 0.35 |
| - | 9 | 14  | -4 | 0.01  | 0.32 |
| - | 9 | -14 | -4 | 0.26  | 0.32 |
|   | 9 | -14 | 4  | 0.62  | 0.39 |
| - | 9 | 14  | -5 | 0.09  | 0.33 |
| - | 9 | -14 | -5 | 0.25  | 0.31 |
|   | 9 | -14 | 5  | 0.48  | 0.39 |
| - | 9 | -14 | -6 | 0.44  | 0.36 |
|   | 9 | -14 | 6  | 0.58  | 0.42 |
|   | 9 | 15  | -9 | 0.40  | 0.50 |
|   | 9 | -15 | -9 | 0.48  | 0.38 |
|   | 9 | 15  | -8 | 0.34  | 0.48 |
|   | 9 | -15 | -8 | 0.18  | 0.35 |
|   | 9 | 15  | -7 | 2.37  | 0.49 |
|   | 9 | -15 | -7 | 2.41  | 0.34 |
|   | 9 | 15  | -6 | 0.74  | 0.42 |
|   | 9 | -15 | -6 | 0.51  | 0.33 |
|   | 9 | 15  | -5 | 1.65  | 0.45 |
|   | 9 | -15 | -5 | 1.65  | 0.31 |
| - | 9 | 15  | 4  | 0.54  | 0.30 |
|   | 9 | 15  | -4 | 0.48  | 0.41 |
|   | 9 | -15 | -4 | 0.64  | 0.32 |
|   | 9 | 15  | -3 | 0.21  | 0.37 |
| - | 9 | 15  | 3  | 0.26  | 0.30 |
| - | 9 | -15 | 3  | 0.40  | 0.24 |
|   | 9 | -15 | -3 | 0.38  | 0.30 |
| - | 9 | 15  | 2  | -0.09 | 0.27 |
|   | 9 | 15  | -2 | -0.20 | 0.40 |
| - | 9 | -15 | 2  | 0.46  | 0.26 |
|   | 9 | -15 | -2 | 0.04  | 0.29 |
|   | 9 | 15  | -1 | 0.94  | 0.44 |
| - | 9 | 15  | 1  | 1.13  | 0.29 |
|   | 9 | -15 | -1 | 1.27  | 0.31 |
| - | 9 | -15 | 1  | 1.43  | 0.28 |
|   | 9 | 15  | 0  | -0.02 | 0.42 |
| - | 9 | 15  | 0  | 0.26  | 0.32 |
| - | 9 | -15 | 0  | 0.51  | 0.28 |
|   | 9 | -15 | 0  | 0.74  | 0.30 |
| - | 9 | 15  | -1 | 0.10  | 0.32 |
|   | 9 | 15  | 1  | -0.29 | 0.40 |
| - | 9 | -15 | -1 | 0.42  | 0.29 |
|   | 9 | -15 | 1  | -0.01 | 0.28 |
| - | 9 | 15  | -2 | 1.36  | 0.35 |
|   | 9 | -15 | 2  | 1.59  | 0.30 |
| - | 9 | -15 | -2 | 1.73  | 0.32 |
| - | 9 | 15  | -3 | -0.05 | 0.33 |

|   |   |     |    |       |      |
|---|---|-----|----|-------|------|
| - | 9 | -15 | -3 | 0.73  | 0.33 |
|   | 9 | -15 | 3  | -0.02 | 0.30 |
| - | 9 | 15  | -4 | 0.33  | 0.34 |
|   | 9 | -15 | 4  | 0.48  | 0.41 |
| - | 9 | -15 | -4 | 0.80  | 0.34 |
|   | 9 | -15 | 5  | 0.61  | 0.44 |
| - | 9 | -15 | -5 | 0.36  | 0.36 |
|   | 9 | 16  | -8 | 0.54  | 0.50 |
|   | 9 | -16 | -8 | 0.72  | 0.38 |
|   | 9 | 16  | -7 | 0.92  | 0.48 |
|   | 9 | -16 | -7 | 1.09  | 0.36 |
|   | 9 | 16  | -6 | 0.97  | 0.43 |
|   | 9 | -16 | -6 | 0.59  | 0.32 |
|   | 9 | 16  | -5 | 0.44  | 0.45 |
|   | 9 | -16 | -5 | 0.04  | 0.33 |
|   | 9 | 16  | -4 | 0.26  | 0.43 |
|   | 9 | -16 | -4 | -0.01 | 0.32 |
| - | 9 | 16  | 3  | 0.03  | 0.31 |
|   | 9 | 16  | -3 | 0.05  | 0.41 |
|   | 9 | -16 | -3 | 0.37  | 0.31 |
| - | 9 | 16  | 2  | 0.20  | 0.32 |
|   | 9 | 16  | -2 | 0.04  | 0.41 |
| - | 9 | -16 | 2  | 0.25  | 0.26 |
|   | 9 | -16 | -2 | 0.11  | 0.29 |
|   | 9 | 16  | -1 | -0.58 | 0.42 |
| - | 9 | 16  | 1  | 0.26  | 0.32 |
| - | 9 | -16 | 1  | 0.39  | 0.28 |
|   | 9 | -16 | -1 | 0.31  | 0.32 |
|   | 9 | 16  | 0  | -0.17 | 0.41 |
| - | 9 | 16  | 0  | 0.01  | 0.33 |
|   | 9 | -16 | 0  | -0.18 | 0.29 |
| - | 9 | -16 | 0  | 0.49  | 0.30 |
| - | 9 | 16  | -1 | 1.15  | 0.34 |
|   | 9 | -16 | 1  | 1.01  | 0.33 |
| - | 9 | -16 | -1 | 1.55  | 0.33 |
| - | 9 | 16  | -2 | 0.62  | 0.34 |
|   | 9 | -16 | 2  | 0.18  | 0.30 |
| - | 9 | -16 | -2 | 0.58  | 0.29 |
| - | 9 | 16  | -3 | 1.44  | 0.37 |
| - | 9 | -16 | -3 | 1.58  | 0.35 |
|   | 9 | -16 | 3  | 1.30  | 0.36 |
| - | 9 | 16  | -4 | 0.21  | 0.35 |
| - | 9 | -16 | -4 | 0.28  | 0.32 |
|   | 9 | -16 | 4  | -0.21 | 0.37 |
|   | 9 | -16 | 5  | 0.91  | 0.43 |
|   | 9 | 17  | -7 | 1.99  | 0.53 |
|   | 9 | -17 | -7 | 1.48  | 0.39 |
|   | 9 | 17  | -6 | -0.30 | 0.46 |
|   | 9 | -17 | -6 | -0.08 | 0.36 |
|   | 9 | 17  | -5 | 0.28  | 0.47 |
|   | 9 | -17 | -5 | 0.26  | 0.35 |
|   | 9 | 17  | -4 | 0.20  | 0.45 |
|   | 9 | -17 | -4 | 0.07  | 0.34 |
|   | 9 | 17  | -3 | 1.23  | 0.45 |

|    |     |     |       |       |      |
|----|-----|-----|-------|-------|------|
| 9  | -17 | -3  | 1.44  | 0.32  |      |
| 9  | 17  | -2  | 0.04  | 0.42  |      |
| -  | 9   | -17 | 2     | 0.01  | 0.29 |
| 9  | -17 | -2  | -0.11 | 0.33  |      |
| -  | 9   | 17  | 1     | 2.62  | 0.37 |
| 9  | 17  | -1  | 2.66  | 0.50  |      |
| -  | 9   | -17 | 1     | 3.59  | 0.43 |
| 9  | -17 | -1  | 3.23  | 0.38  |      |
| -  | 9   | 17  | 0     | 0.02  | 0.34 |
| -  | 9   | -17 | 0     | 0.15  | 0.31 |
| 9  | -17 | 0   | 0.28  | 0.33  |      |
| -  | 9   | 17  | -1    | 0.13  | 0.34 |
| -  | 9   | -17 | -1    | 0.37  | 0.32 |
| 9  | -17 | 1   | 0.06  | 0.31  |      |
| -  | 9   | 17  | -2    | 0.03  | 0.31 |
| -  | 9   | -17 | -2    | 0.22  | 0.33 |
| 9  | -17 | 2   | -0.38 | 0.35  |      |
| -  | 9   | 17  | -3    | 0.11  | 0.35 |
| 9  | -17 | 3   | -0.05 | 0.36  |      |
| -  | 9   | -17 | -3    | 0.54  | 0.35 |
| -  | 9   | 17  | -4    | 0.20  | 0.35 |
| 9  | 18  | -6  | 2.37  | 0.53  |      |
| 9  | 18  | -5  | -0.02 | 0.47  |      |
| 9  | -18 | -5  | -0.25 | 0.36  |      |
| 9  | 18  | -4  | 0.94  | 0.49  |      |
| 9  | -18 | -4  | 1.32  | 0.36  |      |
| 9  | 18  | -3  | 0.94  | 0.46  |      |
| 9  | -18 | -3  | 1.07  | 0.36  |      |
| 9  | 18  | -2  | 0.69  | 0.47  |      |
| 9  | -18 | -2  | 0.78  | 0.36  |      |
| 9  | -18 | -1  | 0.16  | 0.32  |      |
| -  | 9   | -18 | 1     | 0.24  | 0.31 |
| -  | 9   | 18  | 0     | -0.10 | 0.35 |
| 9  | -18 | 0   | 0.29  | 0.35  |      |
| -  | 9   | -18 | 0     | 0.65  | 0.32 |
| -  | 9   | 18  | -1    | 0.67  | 0.36 |
| 9  | -18 | 1   | 0.73  | 0.36  |      |
| -  | 9   | -18 | -1    | 0.68  | 0.34 |
| -  | 9   | 18  | -2    | 0.58  | 0.36 |
| -  | 9   | -18 | -2    | 0.96  | 0.36 |
| -  | 9   | 18  | -3    | 0.27  | 0.36 |
| 9  | 19  | -5  | 2.02  | 0.52  |      |
| 9  | 19  | -4  | 0.49  | 0.48  |      |
| 9  | 19  | -3  | -0.53 | 0.49  |      |
| -  | 9   | -19 | 1     | 0.23  | 0.32 |
| -  | 9   | -19 | 0     | -0.11 | 0.34 |
| 10 | 0   | -14 | -0.29 | 0.43  |      |
| 10 | 0   | -12 | -0.57 | 0.35  |      |
| 10 | 0   | -11 | -0.34 | 0.32  |      |
| 10 | 0   | -10 | -0.31 | 0.30  |      |
| 10 | 0   | -10 | 0.25  | 0.28  |      |
| 10 | 0   | -9  | -0.65 | 0.28  |      |
| 10 | 0   | -9  | -0.03 | 0.26  |      |
| 10 | 0   | -8  | 7.85  | 0.50  |      |

|    |    |     |       |       |
|----|----|-----|-------|-------|
| 10 | 0  | -8  | 8.32  | 0.55  |
| 10 | 0  | -7  | -0.65 | 0.22  |
| 10 | 0  | -7  | 0.03  | 0.25  |
| -  | 10 | 0   | 7     | 0.04  |
| 10 | 0  | -6  | 23.05 | 1.12  |
| -  | 10 | 0   | 6     | 24.08 |
| 10 | 0  | -6  | 25.93 | 0.94  |
| 10 | 0  | -5  | -0.04 | 0.25  |
| 10 | 0  | -5  | -0.40 | 0.18  |
| -  | 10 | 0   | 5     | -0.18 |
| -  | 10 | 0   | 4     | 2.72  |
| 10 | 0  | -4  | 2.84  | 0.31  |
| 10 | 0  | -4  | 2.90  | 0.24  |
| 10 | 0  | -3  | -0.52 | 0.26  |
| 10 | 0  | -3  | -0.01 | 0.18  |
| -  | 10 | 0   | 3     | -0.24 |
| 10 | 0  | -2  | 3.84  | 0.46  |
| 10 | 0  | -2  | 4.18  | 0.32  |
| -  | 10 | 0   | 2     | 4.05  |
| 10 | 0  | -1  | -0.05 | 0.27  |
| -  | 10 | 0   | 1     | -0.05 |
| -  | 10 | 0   | 0     | 28.19 |
| 10 | 0  | 0   | 28.56 | 1.29  |
| -  | 10 | 0   | -1    | -0.03 |
| 10 | 0  | 1   | -0.07 | 0.26  |
| -  | 10 | 0   | -2    | 3.68  |
| 10 | 0  | 2   | 3.82  | 0.46  |
| 10 | 0  | 3   | -0.22 | 0.28  |
| -  | 10 | 0   | -3    | -0.17 |
| -  | 10 | 0   | -4    | 23.94 |
| 10 | 0  | 4   | 22.67 | 1.12  |
| -  | 10 | 0   | -5    | -0.30 |
| 10 | 0  | 5   | 0.25  | 0.36  |
| 10 | 0  | 6   | 0.06  | 0.35  |
| -  | 10 | 0   | -6    | 0.17  |
| -  | 10 | 0   | -7    | 0.19  |
| 10 | 0  | 7   | 0.16  | 0.41  |
| -  | 10 | 0   | -8    | 0.01  |
| 10 | 0  | 8   | 0.60  | 0.44  |
| 10 | 0  | 9   | 0.17  | 0.47  |
| 10 | 1  | -14 | -0.71 | 0.42  |
| 10 | -1 | -14 | -1.12 | 0.42  |
| 10 | 1  | -13 | 0.13  | 0.37  |
| 10 | -1 | -13 | -0.02 | 0.37  |
| 10 | -1 | -12 | -1.00 | 0.35  |
| 10 | 1  | -11 | 3.80  | 0.39  |
| 10 | -1 | -11 | 4.73  | 0.42  |
| 10 | 1  | -10 | 4.88  | 0.50  |
| 10 | 1  | -10 | 4.00  | 0.45  |
| 10 | -1 | -10 | 4.35  | 0.51  |
| 10 | 1  | -9  | -0.04 | 0.27  |
| 10 | 1  | -9  | -0.51 | 0.26  |
| 10 | -1 | -9  | -0.31 | 0.28  |
| 10 | -1 | -9  | -0.02 | 0.24  |

|    |    |    |       |            |
|----|----|----|-------|------------|
| 10 | 1  | -8 | 6.24  | 0.47       |
| 10 | 1  | -8 | 5.12  | 0.42       |
| 10 | -1 | -8 | 6.03  | 0.45       |
| 10 | -1 | -8 | 6.06  | 0.46       |
| -  | 10 | 1  | 7     | 5.62 0.33  |
| 10 | 1  | -7 | 5.36  | 0.46       |
| 10 | 1  | -7 | 4.25  | 0.38       |
| 10 | -1 | -7 | 5.38  | 0.43       |
| 10 | -1 | -7 | 5.15  | 0.46       |
| -  | 10 | 1  | 6     | 7.42 0.42  |
| 10 | 1  | -6 | 7.84  | 0.51       |
| 10 | 1  | -6 | 6.43  | 0.41       |
| 10 | -1 | -6 | 7.91  | 0.45       |
| -  | 10 | -1 | 6     | 7.21 0.38  |
| 10 | -1 | -6 | 7.24  | 0.48       |
| 10 | 1  | -5 | 0.24  | 0.18       |
| 10 | 1  | -5 | 0.53  | 0.27       |
| -  | 10 | 1  | 5     | 0.48 0.19  |
| 10 | -1 | -5 | 0.47  | 0.24       |
| -  | 10 | -1 | 5     | 0.54 0.18  |
| 10 | -1 | -5 | 0.24  | 0.20       |
| 10 | 1  | -4 | 3.15  | 0.31       |
| -  | 10 | 1  | 4     | 3.98 0.35  |
| 10 | 1  | -4 | 3.74  | 0.39       |
| 10 | -1 | -4 | 3.93  | 0.41       |
| 10 | -1 | -4 | 3.97  | 0.37       |
| -  | 10 | -1 | 4     | 4.25 0.33  |
| 10 | 1  | -3 | 2.73  | 0.34       |
| -  | 10 | 1  | 3     | 3.38 0.30  |
| 10 | -1 | -3 | 3.37  | 0.33       |
| -  | 10 | -1 | 3     | 3.71 0.34  |
| 10 | -1 | -3 | 3.06  | 0.33       |
| -  | 10 | 1  | 2     | 0.03 0.19  |
| 10 | 1  | -2 | -0.11 | 0.28       |
| -  | 10 | -1 | 2     | -0.19 0.19 |
| 10 | -1 | -2 | -0.09 | 0.27       |
| 10 | -1 | -2 | -0.13 | 0.16       |
| -  | 10 | 1  | 1     | 0.37 0.23  |
| 10 | 1  | -1 | 0.35  | 0.28       |
| 10 | -1 | -1 | 0.59  | 0.16       |
| -  | 10 | -1 | 1     | 0.43 0.22  |
| 10 | -1 | -1 | 0.69  | 0.29       |
| 10 | 1  | 0  | 1.84  | 0.30       |
| -  | 10 | 1  | 0     | 1.65 0.24  |
| 10 | -1 | 0  | 1.98  | 0.31       |
| -  | 10 | -1 | 0     | 1.85 0.25  |
| 10 | -1 | 0  | 1.91  | 0.19       |
| 10 | 1  | 1  | 2.85  | 0.40       |
| -  | 10 | 1  | -1    | 2.85 0.34  |
| 10 | -1 | 1  | 2.97  | 0.34       |
| -  | 10 | -1 | -1    | 2.71 0.27  |
| 10 | -1 | 1  | 2.81  | 0.29       |
| 10 | 1  | 2  | 0.58  | 0.31       |
| -  | 10 | 1  | -2    | 0.34 0.27  |

|    |    |     |       |       |      |
|----|----|-----|-------|-------|------|
| 10 | -1 | 2   | 0.63  | 0.28  |      |
| -  | 10 | -1  | -2    | 0.52  | 0.25 |
| 10 | 1  | 3   | 0.81  | 0.32  |      |
| -  | 10 | 1   | -3    | 0.85  | 0.26 |
| -  | 10 | -1  | -3    | 0.77  | 0.27 |
| 10 | -1 | 3   | 0.71  | 0.32  |      |
| 10 | 1  | 4   | 0.85  | 0.33  |      |
| -  | 10 | 1   | -4    | 0.43  | 0.30 |
| -  | 10 | -1  | -4    | 0.41  | 0.28 |
| 10 | -1 | 4   | 1.02  | 0.35  |      |
| -  | 10 | 1   | -5    | 0.57  | 0.29 |
| 10 | 1  | 5   | 0.58  | 0.32  |      |
| -  | 10 | -1  | -5    | 0.77  | 0.30 |
| 10 | -1 | 5   | 0.46  | 0.37  |      |
| -  | 10 | 1   | -6    | 0.41  | 0.34 |
| 10 | 1  | 6   | 0.99  | 0.38  |      |
| -  | 10 | -1  | -6    | 0.86  | 0.32 |
| 10 | -1 | 6   | 0.72  | 0.37  |      |
| 10 | 1  | 7   | 0.51  | 0.40  |      |
| -  | 10 | 1   | -7    | 0.33  | 0.36 |
| -  | 10 | -1  | -7    | 0.28  | 0.33 |
| 10 | -1 | 7   | 0.85  | 0.43  |      |
| -  | 10 | 1   | -8    | 0.13  | 0.39 |
| 10 | 1  | 8   | 0.48  | 0.42  |      |
| 10 | -1 | 8   | 0.32  | 0.40  |      |
| -  | 10 | -1  | -8    | -0.11 | 0.36 |
| 10 | 1  | 9   | 2.49  | 0.48  |      |
| 10 | -1 | 9   | 2.26  | 0.46  |      |
| -  | 10 | -1  | -9    | 1.95  | 0.43 |
| 10 | 2  | -14 | 4.16  | 0.49  |      |
| 10 | -2 | -14 | 4.90  | 0.52  |      |
| 10 | 2  | -13 | 0.64  | 0.39  |      |
| 10 | -2 | -13 | 1.06  | 0.42  |      |
| 10 | 2  | -12 | 1.26  | 0.36  |      |
| 10 | -2 | -12 | 1.70  | 0.40  |      |
| 10 | 2  | -11 | 0.55  | 0.32  |      |
| 10 | 2  | -11 | 0.08  | 0.31  |      |
| 10 | -2 | -11 | 0.40  | 0.35  |      |
| 10 | 2  | -10 | 1.35  | 0.34  |      |
| 10 | 2  | -10 | 1.05  | 0.29  |      |
| 10 | -2 | -10 | 1.44  | 0.34  |      |
| 10 | 2  | -9  | 0.62  | 0.29  |      |
| 10 | 2  | -9  | -0.14 | 0.26  |      |
| 10 | -2 | -9  | 0.40  | 0.31  |      |
| 10 | 2  | -8  | 2.76  | 0.33  |      |
| 10 | 2  | -8  | 2.44  | 0.27  |      |
| 10 | -2 | -8  | 2.83  | 0.39  |      |
| 10 | -2 | -8  | 2.86  | 0.32  |      |
| 10 | 2  | -7  | -0.42 | 0.20  |      |
| -  | 10 | 2   | 7     | 0.10  | 0.19 |
| 10 | 2  | -7  | 0.06  | 0.28  |      |
| 10 | -2 | -7  | -0.16 | 0.24  |      |
| 10 | -2 | -7  | -0.45 | 0.25  |      |
| 10 | 2  | -6  | 4.83  | 0.46  |      |

|    |    |    |       |       |      |
|----|----|----|-------|-------|------|
| 10 | 2  | -6 | 4.08  | 0.33  |      |
| -  | 10 | 2  | 6     | 4.84  | 0.36 |
| -  | 10 | -2 | 6     | 4.72  | 0.35 |
| 10 | -2 | -6 | 4.78  | 0.40  |      |
| 10 | -2 | -6 | 5.14  | 0.40  |      |
| 10 | 2  | -5 | -0.04 | 0.28  |      |
| -  | 10 | 2  | 5     | -0.02 | 0.19 |
| 10 | -2 | -5 | -0.46 | 0.21  |      |
| 10 | -2 | -5 | 0.02  | 0.24  |      |
| -  | 10 | -2 | 5     | -0.12 | 0.18 |
| 10 | 2  | -4 | 5.23  | 0.43  |      |
| -  | 10 | 2  | 4     | 4.81  | 0.33 |
| -  | 10 | -2 | 4     | 5.61  | 0.36 |
| 10 | -2 | -4 | 5.21  | 0.37  |      |
| 10 | -2 | -4 | 5.04  | 0.43  |      |
| -  | 10 | 2  | 3     | -0.26 | 0.20 |
| 10 | 2  | -3 | -0.36 | 0.25  |      |
| 10 | -2 | -3 | -0.28 | 0.18  |      |
| -  | 10 | -2 | 3     | -0.16 | 0.19 |
| 10 | -2 | -3 | -0.05 | 0.25  |      |
| 10 | 2  | -2 | 11.09 | 0.65  |      |
| -  | 10 | 2  | 2     | 11.13 | 0.56 |
| 10 | -2 | -2 | 12.23 | 0.52  |      |
| 10 | -2 | -2 | 11.12 | 0.64  |      |
| -  | 10 | -2 | 2     | 11.47 | 0.54 |
| -  | 10 | 2  | 1     | 1.76  | 0.24 |
| 10 | 2  | -1 | 1.80  | 0.31  |      |
| 10 | -2 | -1 | 2.39  | 0.31  |      |
| -  | 10 | -2 | 1     | 2.09  | 0.24 |
| 10 | -2 | -1 | 2.18  | 0.20  |      |
| -  | 10 | 2  | 0     | 11.07 | 0.58 |
| 10 | 2  | 0  | 11.70 | 0.66  |      |
| 10 | -2 | 0  | 11.68 | 0.63  |      |
| -  | 10 | -2 | 0     | 11.84 | 0.56 |
| 10 | -2 | 0  | 11.70 | 0.50  |      |
| 10 | 2  | 1  | 0.40  | 0.29  |      |
| -  | 10 | 2  | -1    | 0.21  | 0.23 |
| -  | 10 | -2 | -1    | 0.40  | 0.21 |
| 10 | -2 | 1  | 0.48  | 0.26  |      |
| 10 | -2 | 1  | 0.21  | 0.17  |      |
| 10 | 2  | 2  | 2.48  | 0.34  |      |
| -  | 10 | 2  | -2    | 2.17  | 0.30 |
| -  | 10 | -2 | -2    | 1.98  | 0.25 |
| 10 | -2 | 2  | 2.23  | 0.33  |      |
| 10 | 2  | 3  | 6.84  | 0.57  |      |
| -  | 10 | 2  | -3    | 7.08  | 0.47 |
| 10 | -2 | 3  | 6.83  | 0.56  |      |
| -  | 10 | -2 | -3    | 7.27  | 0.48 |
| 10 | 2  | 4  | 6.90  | 0.53  |      |
| -  | 10 | 2  | -4    | 7.96  | 0.56 |
| -  | 10 | -2 | -4    | 7.69  | 0.51 |
| 10 | -2 | 4  | 7.25  | 0.60  |      |
| 10 | 2  | 5  | 4.32  | 0.52  |      |
| -  | 10 | 2  | -5    | 4.92  | 0.52 |

|   |    |    |     |       |      |
|---|----|----|-----|-------|------|
| - | 10 | -2 | -5  | 4.47  | 0.47 |
|   | 10 | -2 | 5   | 4.17  | 0.55 |
|   | 10 | 2  | 6   | 0.63  | 0.33 |
| - | 10 | 2  | -6  | 0.52  | 0.35 |
| - | 10 | -2 | -6  | 0.59  | 0.32 |
|   | 10 | -2 | 6   | 0.74  | 0.40 |
|   | 10 | 2  | 7   | 0.33  | 0.38 |
| - | 10 | 2  | -7  | 0.09  | 0.36 |
| - | 10 | -2 | -7  | 0.12  | 0.30 |
|   | 10 | -2 | 7   | 0.34  | 0.38 |
|   | 10 | 2  | 8   | 0.85  | 0.40 |
| - | 10 | 2  | -8  | -0.38 | 0.39 |
| - | 10 | -2 | -8  | -0.01 | 0.35 |
|   | 10 | -2 | 8   | 0.75  | 0.46 |
|   | 10 | 2  | 9   | 2.28  | 0.45 |
| - | 10 | -2 | -9  | 0.70  | 0.39 |
|   | 10 | -2 | 9   | 1.74  | 0.50 |
|   | 10 | 3  | -13 | -0.20 | 0.36 |
|   | 10 | -3 | -13 | -0.62 | 0.40 |
|   | 10 | 3  | -12 | 2.03  | 0.36 |
|   | 10 | 3  | -12 | 2.24  | 0.37 |
|   | 10 | -3 | -12 | 1.91  | 0.41 |
|   | 10 | 3  | -11 | -0.43 | 0.31 |
|   | 10 | 3  | -11 | 0.11  | 0.32 |
|   | 10 | -3 | -11 | -0.44 | 0.36 |
|   | 10 | 3  | -10 | 0.31  | 0.33 |
|   | 10 | 3  | -10 | -0.29 | 0.26 |
|   | 10 | -3 | -10 | -0.20 | 0.33 |
|   | 10 | 3  | -9  | 1.86  | 0.28 |
|   | 10 | 3  | -9  | 1.86  | 0.33 |
|   | 10 | -3 | -9  | 2.23  | 0.33 |
|   | 10 | 3  | -8  | 0.45  | 0.30 |
|   | 10 | 3  | -8  | 0.42  | 0.21 |
|   | 10 | -3 | -8  | 0.28  | 0.29 |
| - | 10 | 3  | 7   | 6.71  | 0.41 |
|   | 10 | 3  | -7  | 6.83  | 0.53 |
|   | 10 | -3 | -7  | 7.14  | 0.48 |
|   | 10 | -3 | -7  | 6.22  | 0.46 |
|   | 10 | 3  | -6  | 0.07  | 0.28 |
| - | 10 | 3  | 6   | 0.33  | 0.19 |
|   | 10 | -3 | -6  | -0.23 | 0.23 |
|   | 10 | -3 | -6  | 0.27  | 0.23 |
| - | 10 | -3 | 6   | 0.06  | 0.18 |
|   | 10 | 3  | -5  | 6.90  | 0.53 |
| - | 10 | 3  | 5   | 6.68  | 0.40 |
|   | 10 | -3 | -5  | 6.54  | 0.45 |
|   | 10 | -3 | -5  | 6.69  | 0.43 |
| - | 10 | -3 | 5   | 6.71  | 0.40 |
|   | 10 | 3  | -4  | 1.58  | 0.30 |
| - | 10 | 3  | 4   | 1.42  | 0.22 |
|   | 10 | -3 | -4  | 1.72  | 0.28 |
|   | 10 | -3 | -4  | 1.85  | 0.22 |
| - | 10 | -3 | 4   | 1.94  | 0.22 |
|   | 10 | 3  | -3  | 3.18  | 0.37 |

|   |    |    |    |       |      |
|---|----|----|----|-------|------|
| - | 10 | 3  | 3  | 3.42  | 0.35 |
|   | 10 | -3 | -3 | 3.15  | 0.32 |
|   | 10 | -3 | -3 | 3.71  | 0.40 |
| - | 10 | -3 | 3  | 3.97  | 0.32 |
| - | 10 | 3  | 2  | 3.05  | 0.28 |
|   | 10 | 3  | -2 | 2.93  | 0.37 |
|   | 10 | -3 | -2 | 3.19  | 0.31 |
|   | 10 | -3 | -2 | 3.46  | 0.39 |
| - | 10 | -3 | 2  | 3.45  | 0.32 |
|   | 10 | 3  | -1 | 1.39  | 0.31 |
| - | 10 | 3  | 1  | 1.53  | 0.25 |
|   | 10 | -3 | -1 | 1.85  | 0.20 |
| - | 10 | -3 | 1  | 1.70  | 0.24 |
|   | 10 | -3 | -1 | 1.96  | 0.29 |
| - | 10 | 3  | 0  | 0.99  | 0.24 |
|   | 10 | 3  | 0  | 1.04  | 0.31 |
|   | 10 | -3 | 0  | 1.34  | 0.29 |
|   | 10 | -3 | 0  | 1.10  | 0.18 |
| - | 10 | -3 | 0  | 1.07  | 0.21 |
|   | 10 | 3  | 1  | 0.15  | 0.30 |
| - | 10 | 3  | -1 | 0.22  | 0.26 |
|   | 10 | -3 | 1  | 0.39  | 0.26 |
| - | 10 | -3 | -1 | 0.42  | 0.23 |
|   | 10 | -3 | 1  | 0.23  | 0.17 |
| - | 10 | 3  | -2 | -0.11 | 0.25 |
|   | 10 | 3  | 2  | -0.01 | 0.32 |
|   | 10 | -3 | 2  | -0.11 | 0.30 |
| - | 10 | -3 | -2 | -0.10 | 0.22 |
|   | 10 | 3  | 3  | 0.30  | 0.29 |
| - | 10 | 3  | -3 | -0.06 | 0.29 |
|   | 10 | -3 | 3  | 0.14  | 0.34 |
| - | 10 | -3 | -3 | 0.39  | 0.26 |
| - | 10 | 3  | -4 | 1.02  | 0.32 |
|   | 10 | 3  | 4  | 1.09  | 0.35 |
| - | 10 | -3 | -4 | 0.90  | 0.28 |
|   | 10 | -3 | 4  | 0.63  | 0.37 |
| - | 10 | 3  | -5 | -0.13 | 0.32 |
|   | 10 | 3  | 5  | 0.06  | 0.34 |
|   | 10 | -3 | 5  | -0.08 | 0.38 |
| - | 10 | -3 | -5 | 0.25  | 0.29 |
|   | 10 | 3  | 6  | 0.31  | 0.35 |
| - | 10 | 3  | -6 | -0.30 | 0.35 |
| - | 10 | -3 | -6 | 0.01  | 0.30 |
|   | 10 | -3 | 6  | 0.29  | 0.40 |
| - | 10 | 3  | -7 | 2.42  | 0.40 |
|   | 10 | 3  | 7  | 2.37  | 0.38 |
| - | 10 | -3 | -7 | 2.82  | 0.37 |
|   | 10 | -3 | 7  | 2.50  | 0.46 |
| - | 10 | 3  | -8 | 0.23  | 0.40 |
|   | 10 | 3  | 8  | 0.64  | 0.40 |
| - | 10 | -3 | -8 | 0.56  | 0.37 |
|   | 10 | -3 | 8  | 0.69  | 0.45 |
|   | 10 | 3  | 9  | 0.72  | 0.43 |
| - | 10 | -3 | -9 | -0.28 | 0.38 |

|    |    |     |       |            |
|----|----|-----|-------|------------|
| 10 | 4  | -14 | 0.35  | 0.41       |
| 10 | 4  | -13 | -0.71 | 0.35       |
| 10 | -4 | -13 | -0.81 | 0.41       |
| 10 | 4  | -12 | 0.07  | 0.35       |
| 10 | 4  | -12 | -0.10 | 0.32       |
| 10 | -4 | -12 | -1.14 | 0.38       |
| 10 | 4  | -11 | 2.76  | 0.39       |
| 10 | 4  | -11 | 2.52  | 0.33       |
| 10 | -4 | -11 | 2.96  | 0.41       |
| 10 | 4  | -10 | 5.71  | 0.55       |
| 10 | -4 | -10 | 7.21  | 0.56       |
| 10 | 4  | -9  | 3.47  | 0.48       |
| 10 | -4 | -9  | 4.40  | 0.39       |
| 10 | 4  | -8  | 0.93  | 0.33       |
| -  | 10 | 4   | 8     | 1.09 0.22  |
| 10 | -4 | -8  | 0.64  | 0.30       |
| 10 | 4  | -7  | 2.70  | 0.33       |
| -  | 10 | 4   | 7     | 2.71 0.31  |
| 10 | -4 | -7  | 3.00  | 0.31       |
| 10 | 4  | -6  | 1.76  | 0.32       |
| -  | 10 | 4   | 6     | 1.78 0.23  |
| 10 | -4 | -6  | 1.89  | 0.25       |
| 10 | -4 | -6  | 1.52  | 0.26       |
| -  | 10 | -4  | 6     | 1.60 0.20  |
| -  | 10 | 4   | 5     | 10.30 0.50 |
| 10 | 4  | -5  | 10.53 | 0.66       |
| -  | 10 | -4  | 5     | 10.52 0.50 |
| 10 | -4 | -5  | 10.71 | 0.52       |
| 10 | -4 | -5  | 10.15 | 0.58       |
| -  | 10 | 4   | 4     | 0.27 0.21  |
| 10 | 4  | -4  | 0.18  | 0.28       |
| -  | 10 | -4  | 4     | 0.53 0.19  |
| 10 | -4 | -4  | 0.25  | 0.24       |
| 10 | -4 | -4  | 0.24  | 0.21       |
| 10 | 4  | -3  | 0.10  | 0.29       |
| -  | 10 | 4   | 3     | -0.03 0.21 |
| 10 | -4 | -3  | 0.20  | 0.24       |
| 10 | -4 | -3  | 0.05  | 0.20       |
| -  | 10 | -4  | 3     | 0.14 0.19  |
| -  | 10 | 4   | 2     | -0.41 0.21 |
| 10 | -4 | -2  | -0.05 | 0.26       |
| 10 | -4 | -2  | -0.22 | 0.18       |
| -  | 10 | -4  | 2     | -0.09 0.20 |
| -  | 10 | 4   | 1     | 2.09 0.25  |
| 10 | 4  | -1  | 2.13  | 0.34       |
| -  | 10 | -4  | 1     | 2.12 0.24  |
| 10 | -4 | -1  | 2.69  | 0.30       |
| 10 | -4 | -1  | 2.32  | 0.30       |
| 10 | 4  | 0   | -0.10 | 0.33       |
| -  | 10 | 4   | 0     | -0.03 0.25 |
| -  | 10 | -4  | 0     | 0.11 0.22  |
| 10 | -4 | 0   | 0.21  | 0.19       |
| 10 | -4 | 0   | 0.32  | 0.24       |
| -  | 10 | 4   | -1    | 0.94 0.25  |

|    |    |     |       |      |      |
|----|----|-----|-------|------|------|
| 10 | 4  | 1   | 0.85  | 0.34 |      |
| 10 | -4 | 1   | 0.99  | 0.19 |      |
| 10 | -4 | 1   | 0.58  | 0.29 |      |
| -  | 10 | -4  | -1    | 0.99 | 0.24 |
| 10 | 4  | 2   | 0.46  | 0.30 |      |
| -  | 10 | 4   | -2    | 0.38 | 0.29 |
| 10 | -4 | 2   | 0.96  | 0.30 |      |
| -  | 10 | -4  | -2    | 0.47 | 0.23 |
| 10 | 4  | 3   | 7.18  | 0.59 |      |
| -  | 10 | 4   | -3    | 6.23 | 0.54 |
| -  | 10 | -4  | -3    | 7.01 | 0.47 |
| 10 | -4 | 3   | 6.56  | 0.52 |      |
| -  | 10 | 4   | -4    | 3.01 | 0.36 |
| 10 | 4  | 4   | 2.83  | 0.38 |      |
| 10 | -4 | 4   | 2.54  | 0.40 |      |
| -  | 10 | -4  | -4    | 2.59 | 0.30 |
| -  | 10 | 4   | -5    | 1.48 | 0.36 |
| 10 | 4  | 5   | 2.14  | 0.37 |      |
| 10 | -4 | 5   | 1.60  | 0.40 |      |
| -  | 10 | -4  | -5    | 1.59 | 0.31 |
| -  | 10 | 4   | -6    | 1.25 | 0.37 |
| 10 | 4  | 6   | 1.58  | 0.35 |      |
| -  | 10 | -4  | -6    | 1.17 | 0.30 |
| 10 | -4 | 6   | 1.25  | 0.42 |      |
| 10 | 4  | 7   | 1.04  | 0.38 |      |
| -  | 10 | 4   | -7    | 0.42 | 0.39 |
| 10 | -4 | 7   | 1.08  | 0.44 |      |
| -  | 10 | -4  | -7    | 0.56 | 0.34 |
| 10 | 4  | 8   | 0.08  | 0.39 |      |
| 10 | -4 | 8   | 0.83  | 0.45 |      |
| -  | 10 | -4  | -8    | 0.27 | 0.36 |
| 10 | 4  | 9   | 0.72  | 0.42 |      |
| -  | 10 | -4  | -9    | 0.72 | 0.41 |
| 10 | 5  | -13 | 1.70  | 0.41 |      |
| 10 | -5 | -13 | 1.42  | 0.40 |      |
| 10 | 5  | -12 | 1.24  | 0.39 |      |
| 10 | -5 | -12 | 0.71  | 0.38 |      |
| 10 | 5  | -11 | 2.11  | 0.40 |      |
| 10 | -5 | -11 | 2.82  | 0.41 |      |
| 10 | 5  | -10 | -0.06 | 0.34 |      |
| 10 | -5 | -10 | -0.43 | 0.33 |      |
| 10 | 5  | -9  | 0.08  | 0.33 |      |
| 10 | -5 | -9  | -0.11 | 0.32 |      |
| 10 | 5  | -8  | 8.65  | 0.62 |      |
| -  | 10 | 5   | 8     | 8.51 | 0.46 |
| 10 | -5 | -8  | 9.76  | 0.57 |      |
| 10 | 5  | -7  | 8.18  | 0.60 |      |
| -  | 10 | 5   | 7     | 8.44 | 0.45 |
| 10 | -5 | -7  | 8.88  | 0.48 |      |
| 10 | 5  | -6  | 1.20  | 0.33 |      |
| -  | 10 | 5   | 6     | 1.38 | 0.22 |
| 10 | -5 | -6  | 1.15  | 0.27 |      |
| -  | 10 | 5   | 5     | 0.15 | 0.21 |
| 10 | 5  | -5  | 0.04  | 0.28 |      |

|   |    |    |    |       |      |
|---|----|----|----|-------|------|
| - | 10 | -5 | 5  | 0.05  | 0.19 |
|   | 10 | -5 | -5 | -0.35 | 0.22 |
|   | 10 | -5 | -5 | 0.11  | 0.22 |
|   | 10 | 5  | -4 | 2.10  | 0.33 |
| - | 10 | 5  | 4  | 1.95  | 0.24 |
|   | 10 | -5 | -4 | 2.07  | 0.24 |
|   | 10 | -5 | -4 | 1.88  | 0.27 |
| - | 10 | -5 | 4  | 1.89  | 0.21 |
| - | 10 | 5  | 3  | 2.45  | 0.26 |
|   | 10 | 5  | -3 | 2.34  | 0.37 |
| - | 10 | -5 | 3  | 3.04  | 0.31 |
|   | 10 | -5 | -3 | 2.61  | 0.30 |
|   | 10 | -5 | -3 | 2.79  | 0.25 |
|   | 10 | 5  | -2 | -0.40 | 0.32 |
| - | 10 | 5  | 2  | 0.43  | 0.21 |
|   | 10 | -5 | -2 | 0.43  | 0.27 |
| - | 10 | -5 | 2  | 0.33  | 0.20 |
|   | 10 | -5 | -2 | 0.42  | 0.20 |
|   | 10 | 5  | -1 | 7.57  | 0.65 |
| - | 10 | 5  | 1  | 7.53  | 0.49 |
|   | 10 | -5 | -1 | 8.31  | 0.42 |
| - | 10 | -5 | 1  | 8.42  | 0.45 |
|   | 10 | -5 | -1 | 8.54  | 0.52 |
| - | 10 | 5  | 0  | -0.27 | 0.22 |
|   | 10 | 5  | 0  | -0.49 | 0.30 |
| - | 10 | -5 | 0  | -0.01 | 0.23 |
|   | 10 | -5 | 0  | 0.23  | 0.27 |
|   | 10 | -5 | 0  | 0.25  | 0.18 |
|   | 10 | 5  | 1  | 0.94  | 0.35 |
| - | 10 | 5  | -1 | 0.90  | 0.28 |
| - | 10 | -5 | -1 | 1.36  | 0.26 |
|   | 10 | -5 | 1  | 1.47  | 0.31 |
|   | 10 | -5 | 1  | 1.12  | 0.20 |
|   | 10 | 5  | 2  | 5.06  | 0.56 |
| - | 10 | 5  | -2 | 4.59  | 0.48 |
|   | 10 | -5 | 2  | 5.53  | 0.51 |
| - | 10 | -5 | -2 | 4.84  | 0.43 |
| - | 10 | 5  | -3 | 4.76  | 0.45 |
|   | 10 | 5  | 3  | 5.56  | 0.50 |
|   | 10 | -5 | 3  | 5.36  | 0.54 |
| - | 10 | -5 | -3 | 5.70  | 0.46 |
| - | 10 | 5  | -4 | -0.39 | 0.28 |
|   | 10 | 5  | 4  | -0.04 | 0.35 |
|   | 10 | -5 | 4  | 0.22  | 0.33 |
| - | 10 | -5 | -4 | 0.47  | 0.26 |
|   | 10 | 5  | 5  | 0.19  | 0.35 |
| - | 10 | 5  | -5 | -0.04 | 0.33 |
|   | 10 | -5 | 5  | 0.34  | 0.39 |
| - | 10 | -5 | -5 | 0.31  | 0.30 |
| - | 10 | 5  | -6 | -0.31 | 0.35 |
|   | 10 | 5  | 6  | 0.45  | 0.36 |
| - | 10 | -5 | -6 | 0.39  | 0.32 |
|   | 10 | -5 | 6  | 0.58  | 0.41 |
|   | 10 | 5  | 7  | 0.51  | 0.38 |

|   |    |    |     |       |      |
|---|----|----|-----|-------|------|
| - | 10 | 5  | -7  | -0.59 | 0.37 |
|   | 10 | -5 | 7   | 0.73  | 0.43 |
| - | 10 | -5 | -7  | 0.04  | 0.34 |
|   | 10 | 5  | 8   | 2.15  | 0.45 |
|   | 10 | -5 | 8   | 2.37  | 0.49 |
| - | 10 | -5 | -8  | 2.05  | 0.38 |
|   | 10 | 5  | 9   | 0.59  | 0.43 |
| - | 10 | -5 | -9  | 0.22  | 0.38 |
|   | 10 | 6  | -13 | 0.69  | 0.41 |
|   | 10 | -6 | -13 | 0.25  | 0.42 |
|   | 10 | 6  | -12 | -0.23 | 0.38 |
|   | 10 | -6 | -12 | -0.64 | 0.39 |
|   | 10 | 6  | -11 | 0.13  | 0.38 |
|   | 10 | -6 | -11 | -0.15 | 0.34 |
|   | 10 | 6  | -10 | 1.01  | 0.37 |
|   | 10 | -6 | -10 | 0.55  | 0.32 |
|   | 10 | 6  | -9  | 2.54  | 0.40 |
|   | 10 | -6 | -9  | 2.39  | 0.35 |
| - | 10 | 6  | 8   | 0.09  | 0.22 |
|   | 10 | 6  | -8  | 0.26  | 0.34 |
|   | 10 | -6 | -8  | 0.29  | 0.30 |
| - | 10 | 6  | 7   | 0.42  | 0.21 |
|   | 10 | 6  | -7  | -0.02 | 0.33 |
|   | 10 | -6 | -7  | -0.26 | 0.27 |
| - | 10 | 6  | 6   | 0.76  | 0.22 |
|   | 10 | 6  | -6  | 0.66  | 0.34 |
|   | 10 | -6 | -6  | 0.30  | 0.26 |
| - | 10 | 6  | 5   | 11.71 | 0.55 |
|   | 10 | 6  | -5  | 11.06 | 0.68 |
|   | 10 | -6 | -5  | 11.44 | 0.53 |
| - | 10 | -6 | 5   | 11.56 | 0.51 |
|   | 10 | 6  | -4  | 1.57  | 0.36 |
| - | 10 | 6  | 4   | 1.77  | 0.24 |
|   | 10 | -6 | -4  | 1.52  | 0.25 |
| - | 10 | -6 | 4   | 1.71  | 0.21 |
|   | 10 | -6 | -4  | 1.43  | 0.22 |
| - | 10 | 6  | 3   | 0.70  | 0.23 |
|   | 10 | 6  | -3  | 0.65  | 0.35 |
|   | 10 | -6 | -3  | 0.60  | 0.25 |
| - | 10 | -6 | 3   | 0.62  | 0.20 |
|   | 10 | -6 | -3  | 0.65  | 0.22 |
|   | 10 | 6  | -2  | 0.30  | 0.35 |
| - | 10 | 6  | 2   | 0.75  | 0.24 |
|   | 10 | -6 | -2  | 0.67  | 0.21 |
| - | 10 | -6 | 2   | 0.78  | 0.22 |
|   | 10 | -6 | -2  | 0.75  | 0.25 |
|   | 10 | 6  | -1  | 6.99  | 0.64 |
| - | 10 | 6  | 1   | 7.76  | 0.46 |
|   | 10 | -6 | -1  | 8.55  | 0.52 |
| - | 10 | -6 | 1   | 8.31  | 0.46 |
|   | 10 | -6 | -1  | 8.94  | 0.43 |
| - | 10 | 6  | 0   | 0.19  | 0.26 |
|   | 10 | 6  | 0   | -0.75 | 0.35 |
| - | 10 | -6 | 0   | 0.25  | 0.22 |

|    |    |     |       |       |      |
|----|----|-----|-------|-------|------|
| 10 | -6 | 0   | 0.27  | 0.20  |      |
| 10 | -6 | 0   | 0.49  | 0.27  |      |
| -  | 10 | 6   | -1    | 4.39  | 0.46 |
| 10 | 6  | 1   | 5.32  | 0.52  |      |
| -  | 10 | -6  | -1    | 5.81  | 0.42 |
| 10 | -6 | 1   | 5.57  | 0.49  |      |
| 10 | -6 | 1   | 5.38  | 0.37  |      |
| -  | 10 | 6   | -2    | 0.02  | 0.26 |
| 10 | 6  | 2   | -0.03 | 0.36  |      |
| -  | 10 | -6  | -2    | 0.28  | 0.26 |
| 10 | -6 | 2   | 0.33  | 0.34  |      |
| 10 | 6  | 3   | -0.50 | 0.34  |      |
| -  | 10 | 6   | -3    | -0.35 | 0.29 |
| -  | 10 | -6  | -3    | 0.01  | 0.27 |
| 10 | -6 | 3   | -0.07 | 0.34  |      |
| 10 | 6  | 4   | 1.88  | 0.34  |      |
| -  | 10 | 6   | -4    | 1.28  | 0.33 |
| 10 | -6 | 4   | 1.68  | 0.39  |      |
| -  | 10 | -6  | -4    | 1.79  | 0.31 |
| 10 | 6  | 5   | 1.65  | 0.38  |      |
| -  | 10 | 6   | -5    | 0.83  | 0.35 |
| 10 | -6 | 5   | 1.33  | 0.40  |      |
| -  | 10 | -6  | -5    | 1.56  | 0.33 |
| -  | 10 | 6   | -6    | -0.42 | 0.35 |
| 10 | 6  | 6   | 0.04  | 0.37  |      |
| 10 | -6 | 6   | 0.45  | 0.37  |      |
| -  | 10 | -6  | -6    | 0.24  | 0.33 |
| -  | 10 | 6   | -7    | -0.52 | 0.37 |
| 10 | 6  | 7   | 0.76  | 0.39  |      |
| -  | 10 | -6  | -7    | -0.02 | 0.35 |
| 10 | -6 | 7   | 0.59  | 0.43  |      |
| 10 | 6  | 8   | 0.25  | 0.40  |      |
| 10 | -6 | 8   | 0.51  | 0.45  |      |
| -  | 10 | -6  | -8    | 0.31  | 0.37 |
| 10 | 7  | -13 | -0.13 | 0.44  |      |
| 10 | -7 | -13 | -0.44 | 0.42  |      |
| 10 | 7  | -12 | 1.65  | 0.43  |      |
| 10 | -7 | -12 | 1.61  | 0.43  |      |
| 10 | 7  | -11 | 0.63  | 0.41  |      |
| 10 | -7 | -11 | 0.86  | 0.35  |      |
| 10 | 7  | -10 | 1.32  | 0.40  |      |
| 10 | -7 | -10 | 1.45  | 0.34  |      |
| 10 | 7  | -9  | 4.03  | 0.56  |      |
| 10 | -7 | -9  | 5.02  | 0.52  |      |
| 10 | 7  | -8  | 2.52  | 0.40  |      |
| -  | 10 | 7   | 8     | 2.85  | 0.35 |
| 10 | -7 | -8  | 2.79  | 0.34  |      |
| -  | 10 | 7   | 7     | 6.90  | 0.44 |
| 10 | 7  | -7  | 7.18  | 0.60  |      |
| 10 | -7 | -7  | 7.28  | 0.50  |      |
| 10 | 7  | -6  | 1.90  | 0.35  |      |
| -  | 10 | 7   | 6     | 1.62  | 0.24 |
| 10 | -7 | -6  | 1.43  | 0.28  |      |
| 10 | 7  | -5  | 0.76  | 0.35  |      |

|   |    |    |    |       |      |
|---|----|----|----|-------|------|
| - | 10 | 7  | 5  | 0.81  | 0.23 |
|   | 10 | -7 | -5 | 0.74  | 0.25 |
| - | 10 | -7 | 5  | 0.72  | 0.20 |
|   | 10 | 7  | -4 | 0.41  | 0.35 |
| - | 10 | 7  | 4  | 0.62  | 0.23 |
|   | 10 | -7 | -4 | 0.41  | 0.23 |
|   | 10 | -7 | -4 | 0.56  | 0.23 |
| - | 10 | -7 | 4  | 0.47  | 0.20 |
|   | 10 | 7  | -3 | -0.14 | 0.33 |
| - | 10 | 7  | 3  | -0.07 | 0.23 |
| - | 10 | -7 | 3  | 0.10  | 0.20 |
|   | 10 | -7 | -3 | 0.14  | 0.22 |
|   | 10 | -7 | -3 | 0.12  | 0.20 |
|   | 10 | 7  | -2 | 2.90  | 0.42 |
| - | 10 | 7  | 2  | 3.64  | 0.39 |
|   | 10 | -7 | -2 | 3.79  | 0.40 |
| - | 10 | -7 | 2  | 3.61  | 0.31 |
|   | 10 | -7 | -2 | 3.63  | 0.36 |
|   | 10 | 7  | -1 | -0.04 | 0.33 |
| - | 10 | 7  | 1  | 0.79  | 0.24 |
|   | 10 | -7 | -1 | 0.81  | 0.26 |
| - | 10 | -7 | 1  | 0.71  | 0.24 |
|   | 10 | -7 | -1 | 0.97  | 0.20 |
| - | 10 | 7  | 0  | 3.60  | 0.43 |
|   | 10 | 7  | 0  | 3.21  | 0.42 |
|   | 10 | -7 | 0  | 4.21  | 0.42 |
| - | 10 | -7 | 0  | 3.91  | 0.38 |
|   | 10 | -7 | 0  | 4.16  | 0.35 |
|   | 10 | 7  | 1  | 1.56  | 0.40 |
| - | 10 | 7  | -1 | 1.82  | 0.29 |
|   | 10 | -7 | 1  | 2.29  | 0.24 |
| - | 10 | -7 | -1 | 2.28  | 0.28 |
|   | 10 | -7 | 1  | 2.49  | 0.34 |
|   | 10 | 7  | 2  | -0.87 | 0.35 |
| - | 10 | 7  | -2 | -0.74 | 0.28 |
|   | 10 | -7 | 2  | -0.15 | 0.33 |
| - | 10 | -7 | -2 | 0.15  | 0.26 |
|   | 10 | -7 | 2  | -0.08 | 0.21 |
|   | 10 | 7  | 3  | -0.45 | 0.36 |
| - | 10 | 7  | -3 | -0.68 | 0.30 |
|   | 10 | -7 | 3  | 0.47  | 0.35 |
| - | 10 | -7 | -3 | 0.04  | 0.25 |
| - | 10 | 7  | -4 | -0.26 | 0.32 |
|   | 10 | 7  | 4  | -0.34 | 0.36 |
| - | 10 | -7 | -4 | 0.24  | 0.29 |
|   | 10 | -7 | 4  | 0.15  | 0.37 |
| - | 10 | 7  | -5 | -0.42 | 0.33 |
|   | 10 | 7  | 5  | 0.24  | 0.35 |
|   | 10 | -7 | 5  | 0.24  | 0.39 |
| - | 10 | -7 | -5 | 0.21  | 0.31 |
|   | 10 | 7  | 6  | 2.93  | 0.43 |
| - | 10 | 7  | -6 | 1.83  | 0.39 |
|   | 10 | -7 | 6  | 2.79  | 0.45 |
| - | 10 | -7 | -6 | 2.73  | 0.37 |

|    |    |     |       |       |      |
|----|----|-----|-------|-------|------|
| 10 | 7  | 7   | 0.35  | 0.39  |      |
| -  | 10 | 7   | -7    | -0.59 | 0.37 |
| 10 | -7 | 7   | 0.63  | 0.40  |      |
| -  | 10 | -7  | -7    | 0.52  | 0.36 |
| 10 | 7  | 8   | 0.69  | 0.41  |      |
| 10 | -7 | 8   | 1.21  | 0.43  |      |
| -  | 10 | -7  | -8    | 0.77  | 0.39 |
| 10 | 8  | -13 | 0.05  | 0.44  |      |
| 10 | 8  | -12 | 0.33  | 0.42  |      |
| 10 | -8 | -12 | 0.50  | 0.40  |      |
| 10 | 8  | -11 | 1.22  | 0.43  |      |
| 10 | -8 | -11 | 1.48  | 0.38  |      |
| 10 | 8  | -10 | 0.33  | 0.39  |      |
| 10 | -8 | -10 | 0.29  | 0.32  |      |
| 10 | 8  | -9  | 3.33  | 0.45  |      |
| 10 | -8 | -9  | 3.51  | 0.38  |      |
| 10 | 8  | -8  | 0.97  | 0.35  |      |
| -  | 10 | 8   | 8     | 0.75  | 0.25 |
| 10 | -8 | -8  | 0.75  | 0.28  |      |
| 10 | 8  | -7  | 0.19  | 0.37  |      |
| -  | 10 | 8   | 7     | -0.25 | 0.23 |
| 10 | -8 | -7  | -0.23 | 0.29  |      |
| 10 | 8  | -6  | 0.36  | 0.36  |      |
| -  | 10 | 8   | 6     | 0.40  | 0.23 |
| 10 | -8 | -6  | -0.09 | 0.24  |      |
| 10 | 8  | -5  | 10.57 | 0.72  |      |
| -  | 10 | 8   | 5     | 10.86 | 0.55 |
| 10 | -8 | -5  | 10.69 | 0.52  |      |
| -  | 10 | -8  | 5     | 10.52 | 0.48 |
| -  | 10 | 8   | 4     | 0.47  | 0.22 |
| 10 | 8  | -4  | 0.30  | 0.34  |      |
| -  | 10 | -8  | 4     | 0.54  | 0.21 |
| 10 | -8 | -4  | 0.35  | 0.22  |      |
| -  | 10 | 8   | 3     | 8.63  | 0.47 |
| 10 | 8  | -3  | 8.62  | 0.63  |      |
| 10 | -8 | -3  | 8.84  | 0.48  |      |
| -  | 10 | -8  | 3     | 8.77  | 0.46 |
| 10 | -8 | -3  | 8.84  | 0.52  |      |
| -  | 10 | 8   | 2     | 0.28  | 0.23 |
| 10 | 8  | -2  | -0.43 | 0.34  |      |
| 10 | -8 | -2  | 0.11  | 0.22  |      |
| -  | 10 | -8  | 2     | 0.01  | 0.22 |
| 10 | -8 | -2  | 0.20  | 0.24  |      |
| -  | 10 | 8   | 1     | 0.27  | 0.24 |
| 10 | 8  | -1  | -0.62 | 0.37  |      |
| 10 | -8 | -1  | 0.20  | 0.27  |      |
| 10 | -8 | -1  | 0.41  | 0.22  |      |
| -  | 10 | -8  | 1     | 0.34  | 0.23 |
| -  | 10 | 8   | 0     | -0.08 | 0.27 |
| -  | 10 | -8  | 0     | 0.22  | 0.22 |
| 10 | -8 | 0   | -0.04 | 0.22  |      |
| 10 | -8 | 0   | 0.11  | 0.28  |      |
| 10 | 8  | 1   | -0.83 | 0.38  |      |
| -  | 10 | 8   | -1    | -0.43 | 0.25 |

|    |    |     |       |       |
|----|----|-----|-------|-------|
| 10 | -8 | 1   | 0.11  | 0.31  |
| -  | 10 | -8  | -1    | 0.01  |
| 10 | -8 | 1   | 0.07  | 0.20  |
| -  | 10 | 8   | -2    | -0.82 |
| 10 | 8  | 2   | -0.86 | 0.37  |
| 10 | -8 | 2   | 0.03  | 0.33  |
| 10 | -8 | 2   | -0.25 | 0.23  |
| -  | 10 | -8  | -2    | 0.21  |
| -  | 10 | 8   | -3    | -0.85 |
| 10 | 8  | 3   | -0.58 | 0.36  |
| 10 | -8 | 3   | 0.05  | 0.35  |
| -  | 10 | -8  | -3    | 0.12  |
| 10 | 8  | 4   | 0.41  | 0.37  |
| -  | 10 | 8   | -4    | -0.26 |
| 10 | -8 | 4   | 0.83  | 0.38  |
| -  | 10 | -8  | -4    | 0.90  |
| -  | 10 | 8   | -5    | 4.48  |
| 10 | 8  | 5   | 6.17  | 0.60  |
| -  | 10 | -8  | -5    | 6.15  |
| 10 | -8 | 5   | 6.02  | 0.58  |
| 10 | 8  | 6   | 2.40  | 0.41  |
| -  | 10 | 8   | -6    | 1.73  |
| -  | 10 | -8  | -6    | 2.31  |
| 10 | -8 | 6   | 2.61  | 0.45  |
| 10 | 8  | 7   | 0.04  | 0.38  |
| -  | 10 | -8  | -7    | 0.27  |
| 10 | -8 | 7   | 0.30  | 0.43  |
| -  | 10 | -8  | -8    | 0.58  |
| 10 | 9  | -12 | 2.14  | 0.48  |
| 10 | -9 | -12 | 2.48  | 0.44  |
| 10 | 9  | -11 | 0.18  | 0.43  |
| 10 | -9 | -11 | 0.04  | 0.37  |
| 10 | 9  | -10 | 0.26  | 0.41  |
| 10 | -9 | -10 | 0.52  | 0.35  |
| 10 | 9  | -9  | 0.62  | 0.38  |
| 10 | -9 | -9  | 0.20  | 0.33  |
| -  | 10 | 9   | 8     | 1.73  |
| 10 | 9  | -8  | 2.28  | 0.43  |
| 10 | -9 | -8  | 1.98  | 0.34  |
| 10 | 9  | -7  | 0.63  | 0.39  |
| -  | 10 | 9   | 7     | 0.86  |
| 10 | -9 | -7  | 0.74  | 0.31  |
| 10 | 9  | -6  | 2.38  | 0.38  |
| -  | 10 | 9   | 6     | 2.29  |
| 10 | -9 | -6  | 1.58  | 0.28  |
| 10 | 9  | -5  | 0.70  | 0.39  |
| -  | 10 | 9   | 5     | 0.43  |
| 10 | -9 | -5  | 0.71  | 0.27  |
| -  | 10 | 9   | 4     | 0.30  |
| 10 | 9  | -4  | -0.26 | 0.37  |
| 10 | -9 | -4  | -0.10 | 0.25  |
| -  | 10 | -9  | 4     | 0.28  |
| -  | 10 | 9   | 3     | 0.33  |
| 10 | 9  | -3  | -0.24 | 0.38  |

|    |     |     |       |       |
|----|-----|-----|-------|-------|
| 10 | -9  | -3  | 0.58  | 0.22  |
| -  | 10  | -9  | 3     | 0.24  |
| 10 | 9   | -2  | 9.61  | 0.73  |
| -  | 10  | 9   | 2     | 9.57  |
| 10 | -9  | -2  | 9.16  | 0.56  |
| 10 | -9  | -2  | 9.42  | 0.50  |
| -  | 10  | -9  | 2     | 9.17  |
| 10 | 9   | -1  | -0.60 | 0.35  |
| -  | 10  | 9   | 1     | 0.22  |
| 10 | -9  | -1  | 0.34  | 0.21  |
| 10 | -9  | -1  | 0.26  | 0.27  |
| -  | 10  | -9  | 1     | 0.39  |
| -  | 10  | 9   | 0     | 1.40  |
| 10 | 9   | 0   | 0.22  | 0.41  |
| 10 | -9  | 0   | 1.70  | 0.25  |
| -  | 10  | -9  | 0     | 1.33  |
| 10 | -9  | 0   | 1.67  | 0.31  |
| -  | 10  | 9   | -1    | -0.07 |
| -  | 10  | -9  | -1    | 0.24  |
| 10 | -9  | 1   | 0.42  | 0.31  |
| 10 | -9  | 1   | -0.04 | 0.21  |
| 10 | 9   | 2   | 2.29  | 0.45  |
| -  | 10  | 9   | -2    | 2.63  |
| 10 | -9  | 2   | 3.25  | 0.46  |
| -  | 10  | -9  | -2    | 3.99  |
| 10 | -9  | 2   | 3.13  | 0.29  |
| 10 | 9   | 3   | -0.70 | 0.37  |
| -  | 10  | 9   | -3    | -0.57 |
| 10 | -9  | 3   | 0.32  | 0.35  |
| -  | 10  | -9  | -3    | 0.20  |
| -  | 10  | 9   | -4    | -0.42 |
| 10 | 9   | 4   | -0.11 | 0.38  |
| 10 | -9  | 4   | 0.54  | 0.38  |
| -  | 10  | -9  | -4    | 0.33  |
| 10 | 9   | 5   | -0.42 | 0.38  |
| -  | 10  | 9   | -5    | -0.76 |
| 10 | -9  | 5   | 0.40  | 0.40  |
| -  | 10  | -9  | -5    | 0.38  |
| 10 | 9   | 6   | -0.04 | 0.39  |
| -  | 10  | 9   | -6    | -0.36 |
| 10 | -9  | 6   | 0.95  | 0.42  |
| -  | 10  | -9  | -6    | 0.67  |
| -  | 10  | -9  | -7    | 0.33  |
| 10 | -9  | 7   | 0.65  | 0.46  |
| 10 | 10  | -12 | -0.02 | 0.46  |
| 10 | 10  | -11 | -0.24 | 0.45  |
| 10 | -10 | -11 | 0.21  | 0.39  |
| 10 | 10  | -10 | 0.41  | 0.44  |
| 10 | -10 | -10 | 0.37  | 0.37  |
| 10 | 10  | -9  | -0.02 | 0.43  |
| 10 | -10 | -9  | 0.35  | 0.34  |
| 10 | 10  | -8  | -0.01 | 0.42  |
| 10 | -10 | -8  | 0.04  | 0.31  |
| -  | 10  | 10  | 7     | -0.09 |

|    |     |     |       |       |
|----|-----|-----|-------|-------|
| 10 | 10  | -7  | 0.11  | 0.40  |
| 10 | -10 | -7  | -0.34 | 0.27  |
| 10 | 10  | -6  | 0.49  | 0.40  |
| -  | 10  | 10  | 6     | 0.43  |
| 10 | -10 | -6  | 0.45  | 0.29  |
| 10 | 10  | -5  | 5.86  | 0.62  |
| -  | 10  | 10  | 5     | 5.20  |
| 10 | -10 | -5  | 5.37  | 0.45  |
| 10 | 10  | -4  | -0.05 | 0.36  |
| -  | 10  | 10  | 4     | 0.23  |
| 10 | -10 | -4  | -0.10 | 0.23  |
| -  | 10  | -10 | 4     | -0.18 |
| 10 | 10  | -3  | -0.23 | 0.40  |
| -  | 10  | 10  | 3     | -0.07 |
| 10 | -10 | -3  | 0.13  | 0.25  |
| -  | 10  | -10 | 3     | 0.13  |
| 10 | 10  | -2  | 0.60  | 0.41  |
| -  | 10  | 10  | 2     | 0.36  |
| -  | 10  | -10 | 2     | 0.48  |
| 10 | -10 | -2  | 0.37  | 0.24  |
| 10 | 10  | -1  | -0.10 | 0.41  |
| -  | 10  | 10  | 1     | 0.26  |
| 10 | -10 | -1  | 0.65  | 0.25  |
| 10 | -10 | -1  | 0.37  | 0.27  |
| -  | 10  | -10 | 1     | 0.46  |
| -  | 10  | 10  | 0     | 1.44  |
| 10 | 10  | 0   | 0.27  | 0.42  |
| -  | 10  | -10 | 0     | 1.45  |
| 10 | -10 | 0   | 1.64  | 0.31  |
| 10 | -10 | 0   | 1.51  | 0.24  |
| -  | 10  | 10  | -1    | 1.11  |
| -  | 10  | -10 | -1    | 1.12  |
| 10 | -10 | 1   | 1.19  | 0.33  |
| 10 | -10 | 1   | 0.94  | 0.25  |
| -  | 10  | 10  | -2    | -0.29 |
| -  | 10  | -10 | -2    | 0.02  |
| 10 | -10 | 2   | -0.10 | 0.26  |
| 10 | -10 | 2   | 0.27  | 0.34  |
| -  | 10  | 10  | -3    | -0.25 |
| 10 | 10  | 3   | -1.05 | 0.39  |
| 10 | -10 | 3   | 0.68  | 0.36  |
| -  | 10  | -10 | -3    | -0.01 |
| 10 | 10  | 4   | -0.84 | 0.39  |
| -  | 10  | 10  | -4    | -0.67 |
| 10 | -10 | 4   | 0.02  | 0.37  |
| -  | 10  | -10 | -4    | 0.01  |
| 10 | 10  | 5   | -0.72 | 0.41  |
| -  | 10  | 10  | -5    | -0.82 |
| -  | 10  | -10 | -5    | 0.36  |
| 10 | -10 | 5   | 0.34  | 0.40  |
| -  | 10  | 10  | -6    | -0.94 |
| 10 | 10  | 6   | -0.81 | 0.41  |
| 10 | -10 | 6   | 0.36  | 0.43  |
| -  | 10  | -10 | -6    | 0.46  |

|   |    |     |     |       |      |
|---|----|-----|-----|-------|------|
| - | 10 | -10 | -7  | 0.55  | 0.34 |
|   | 10 | -10 | 7   | 0.71  | 0.45 |
|   | 10 | 11  | -11 | 0.10  | 0.48 |
|   | 10 | -11 | -11 | 0.24  | 0.36 |
|   | 10 | 11  | -10 | 0.13  | 0.46 |
|   | 10 | -11 | -10 | 0.04  | 0.34 |
|   | 10 | 11  | -9  | -0.17 | 0.44 |
|   | 10 | -11 | -9  | -0.06 | 0.34 |
|   | 10 | 11  | -8  | 3.47  | 0.50 |
|   | 10 | -11 | -8  | 3.45  | 0.37 |
|   | 10 | 11  | -7  | 0.09  | 0.42 |
| - | 10 | 11  | 7   | -0.06 | 0.26 |
|   | 10 | -11 | -7  | -0.35 | 0.31 |
|   | 10 | 11  | -6  | 5.20  | 0.64 |
| - | 10 | 11  | 6   | 4.85  | 0.44 |
|   | 10 | -11 | -6  | 5.11  | 0.47 |
|   | 10 | 11  | -5  | 7.78  | 0.69 |
| - | 10 | 11  | 5   | 8.02  | 0.51 |
|   | 10 | -11 | -5  | 8.32  | 0.52 |
| - | 10 | 11  | 4   | -0.20 | 0.27 |
|   | 10 | 11  | -4  | -0.21 | 0.41 |
| - | 10 | -11 | 4   | -0.24 | 0.22 |
|   | 10 | -11 | -4  | 0.15  | 0.27 |
| - | 10 | 11  | 3   | 2.44  | 0.31 |
|   | 10 | 11  | -3  | 2.40  | 0.46 |
| - | 10 | -11 | 3   | 2.85  | 0.34 |
|   | 10 | -11 | -3  | 2.63  | 0.30 |
| - | 10 | 11  | 2   | 3.93  | 0.45 |
|   | 10 | 11  | -2  | 3.58  | 0.50 |
|   | 10 | -11 | -2  | 4.08  | 0.40 |
| - | 10 | -11 | 2   | 4.41  | 0.38 |
| - | 10 | 11  | 1   | 0.56  | 0.29 |
|   | 10 | 11  | -1  | -0.26 | 0.41 |
|   | 10 | -11 | -1  | 0.51  | 0.23 |
| - | 10 | -11 | 1   | 0.39  | 0.25 |
| - | 10 | 11  | 0   | 1.98  | 0.30 |
|   | 10 | 11  | 0   | 1.03  | 0.44 |
| - | 10 | -11 | 0   | 1.81  | 0.29 |
|   | 10 | -11 | 0   | 1.74  | 0.27 |
|   | 10 | -11 | 0   | 2.13  | 0.34 |
| - | 10 | 11  | -1  | -0.09 | 0.30 |
| - | 10 | -11 | -1  | 0.15  | 0.27 |
|   | 10 | -11 | 1   | 0.11  | 0.23 |
|   | 10 | -11 | 1   | 0.16  | 0.33 |
| - | 10 | 11  | -2  | 0.28  | 0.32 |
|   | 10 | -11 | 2   | 0.38  | 0.27 |
|   | 10 | -11 | 2   | 0.65  | 0.34 |
| - | 10 | -11 | -2  | 0.35  | 0.26 |
| - | 10 | 11  | -3  | -0.37 | 0.32 |
| - | 10 | -11 | -3  | 0.47  | 0.30 |
|   | 10 | -11 | 3   | 0.61  | 0.36 |
|   | 10 | 11  | 4   | -1.00 | 0.39 |
| - | 10 | 11  | -4  | -0.29 | 0.33 |
| - | 10 | -11 | -4  | -0.13 | 0.28 |

|    |     |     |       |       |
|----|-----|-----|-------|-------|
| 10 | -11 | 4   | 0.58  | 0.39  |
| -  | 10  | 11  | -5    | 0.19  |
| 10 | 11  | 5   | -0.07 | 0.42  |
| -  | 10  | -11 | -5    | 0.67  |
| 10 | -11 | 5   | 0.91  | 0.42  |
| -  | 10  | 11  | -6    | -0.42 |
| 10 | -11 | 6   | 0.70  | 0.44  |
| -  | 10  | -11 | -6    | 0.57  |
| 10 | 12  | -11 | 0.24  | 0.50  |
| 10 | 12  | -10 | 1.05  | 0.50  |
| 10 | -12 | -10 | 0.54  | 0.39  |
| 10 | 12  | -9  | 0.91  | 0.48  |
| 10 | -12 | -9  | 1.29  | 0.37  |
| 10 | 12  | -8  | 0.42  | 0.47  |
| 10 | -12 | -8  | 0.48  | 0.31  |
| 10 | 12  | -7  | -0.07 | 0.40  |
| 10 | -12 | -7  | -0.10 | 0.32  |
| -  | 10  | 12  | 6     | 0.62  |
| 10 | 12  | -6  | 0.26  | 0.40  |
| 10 | -12 | -6  | 0.31  | 0.28  |
| -  | 10  | 12  | 5     | 0.92  |
| 10 | 12  | -5  | 0.74  | 0.40  |
| 10 | -12 | -5  | 0.74  | 0.28  |
| -  | 10  | 12  | 4     | 0.74  |
| 10 | 12  | -4  | 0.23  | 0.39  |
| 10 | -12 | -4  | 0.93  | 0.29  |
| 10 | 12  | -3  | 1.48  | 0.46  |
| -  | 10  | 12  | 3     | 1.71  |
| 10 | -12 | -3  | 1.64  | 0.29  |
| -  | 10  | -12 | 3     | 1.98  |
| -  | 10  | 12  | 2     | 0.28  |
| 10 | 12  | -2  | -0.10 | 0.38  |
| 10 | -12 | -2  | 0.24  | 0.25  |
| -  | 10  | -12 | 2     | 0.20  |
| -  | 10  | 12  | 1     | 1.25  |
| 10 | 12  | -1  | 0.93  | 0.44  |
| 10 | -12 | -1  | 1.58  | 0.26  |
| -  | 10  | -12 | 1     | 1.43  |
| -  | 10  | 12  | 0     | -0.03 |
| -  | 10  | -12 | 0     | 0.07  |
| 10 | -12 | 0   | -0.01 | 0.26  |
| -  | 10  | 12  | -1    | -0.09 |
| 10 | -12 | 1   | 0.18  | 0.28  |
| -  | 10  | -12 | -1    | 0.09  |
| 10 | -12 | 1   | 0.23  | 0.31  |
| -  | 10  | 12  | -2    | -0.07 |
| -  | 10  | -12 | -2    | 0.30  |
| 10 | -12 | 2   | 0.35  | 0.36  |
| 10 | -12 | 2   | -0.20 | 0.28  |
| -  | 10  | 12  | -3    | 0.95  |
| 10 | 12  | 3   | -0.43 | 0.41  |
| 10 | -12 | 3   | 0.82  | 0.31  |
| -  | 10  | -12 | -3    | 1.10  |
| 10 | -12 | 3   | 1.29  | 0.40  |

|   |    |     |     |       |      |
|---|----|-----|-----|-------|------|
| - | 10 | 12  | -4  | -0.27 | 0.34 |
|   | 10 | -12 | 4   | 0.59  | 0.39 |
| - | 10 | -12 | -4  | 0.20  | 0.33 |
| - | 10 | 12  | -5  | -0.07 | 0.35 |
| - | 10 | -12 | -5  | 1.19  | 0.35 |
|   | 10 | -12 | 5   | 1.11  | 0.42 |
|   | 10 | -12 | 6   | 0.53  | 0.45 |
| - | 10 | -12 | -6  | 0.81  | 0.37 |
|   | 10 | 13  | -10 | 0.12  | 0.47 |
|   | 10 | -13 | -10 | -0.05 | 0.39 |
|   | 10 | 13  | -9  | 0.64  | 0.49 |
|   | 10 | -13 | -9  | 1.05  | 0.38 |
|   | 10 | 13  | -8  | -0.22 | 0.48 |
|   | 10 | -13 | -8  | -0.13 | 0.34 |
|   | 10 | 13  | -7  | 0.23  | 0.47 |
|   | 10 | -13 | -7  | 0.22  | 0.30 |
|   | 10 | 13  | -6  | 0.28  | 0.45 |
| - | 10 | 13  | 6   | -0.06 | 0.28 |
|   | 10 | -13 | -6  | -0.20 | 0.31 |
| - | 10 | 13  | 5   | 2.15  | 0.32 |
|   | 10 | 13  | -5  | 2.92  | 0.50 |
|   | 10 | -13 | -5  | 2.21  | 0.31 |
|   | 10 | 13  | -4  | -0.17 | 0.44 |
| - | 10 | 13  | 4   | 0.14  | 0.29 |
|   | 10 | -13 | -4  | 0.23  | 0.30 |
|   | 10 | 13  | -3  | -0.32 | 0.44 |
| - | 10 | 13  | 3   | 0.05  | 0.27 |
| - | 10 | -13 | 3   | 0.31  | 0.24 |
|   | 10 | -13 | -3  | -0.15 | 0.26 |
| - | 10 | 13  | 2   | 2.31  | 0.34 |
|   | 10 | 13  | -2  | 2.17  | 0.47 |
| - | 10 | -13 | 2   | 2.14  | 0.28 |
|   | 10 | -13 | -2  | 2.08  | 0.29 |
| - | 10 | 13  | 1   | 0.84  | 0.29 |
|   | 10 | 13  | -1  | 0.28  | 0.44 |
|   | 10 | -13 | -1  | 0.81  | 0.28 |
| - | 10 | -13 | 1   | 0.90  | 0.28 |
| - | 10 | 13  | 0   | -0.06 | 0.31 |
|   | 10 | 13  | 0   | -0.94 | 0.42 |
| - | 10 | -13 | 0   | 0.25  | 0.28 |
|   | 10 | -13 | 0   | 0.21  | 0.26 |
| - | 10 | 13  | -1  | 1.62  | 0.35 |
|   | 10 | 13  | 1   | 0.51  | 0.45 |
|   | 10 | -13 | 1   | 1.22  | 0.30 |
| - | 10 | -13 | -1  | 1.62  | 0.31 |
| - | 10 | 13  | -2  | -0.23 | 0.33 |
|   | 10 | -13 | 2   | -0.11 | 0.29 |
| - | 10 | -13 | -2  | 0.13  | 0.30 |
|   | 10 | -13 | 2   | 0.57  | 0.35 |
| - | 10 | 13  | -3  | 2.02  | 0.35 |
| - | 10 | -13 | -3  | 2.58  | 0.35 |
|   | 10 | -13 | 3   | 2.71  | 0.40 |
|   | 10 | -13 | 3   | 1.65  | 0.31 |
| - | 10 | 13  | -4  | 1.86  | 0.38 |

|   |    |     |    |       |      |
|---|----|-----|----|-------|------|
| - | 10 | -13 | -4 | 1.72  | 0.35 |
|   | 10 | -13 | 4  | 2.44  | 0.42 |
| - | 10 | 13  | -5 | -0.77 | 0.37 |
| - | 10 | -13 | -5 | 0.41  | 0.35 |
|   | 10 | -13 | 5  | 0.80  | 0.42 |
|   | 10 | 14  | -9 | 1.04  | 0.49 |
|   | 10 | -14 | -9 | 1.12  | 0.35 |
|   | 10 | 14  | -8 | -0.07 | 0.50 |
|   | 10 | -14 | -8 | 0.29  | 0.36 |
|   | 10 | 14  | -7 | 0.18  | 0.45 |
|   | 10 | -14 | -7 | 0.06  | 0.34 |
|   | 10 | 14  | -6 | 1.38  | 0.49 |
|   | 10 | -14 | -6 | 1.47  | 0.34 |
|   | 10 | 14  | -5 | 0.48  | 0.47 |
| - | 10 | 14  | 5  | 0.79  | 0.32 |
|   | 10 | -14 | -5 | 0.53  | 0.30 |
| - | 10 | 14  | 4  | 0.16  | 0.31 |
|   | 10 | 14  | -4 | 0.29  | 0.46 |
|   | 10 | -14 | -4 | 0.74  | 0.29 |
|   | 10 | 14  | -3 | 0.02  | 0.45 |
| - | 10 | 14  | 3  | 0.16  | 0.31 |
|   | 10 | -14 | -3 | 0.01  | 0.26 |
| - | 10 | -14 | 3  | 0.21  | 0.25 |
| - | 10 | 14  | 2  | 0.14  | 0.29 |
|   | 10 | 14  | -2 | -0.30 | 0.45 |
|   | 10 | -14 | -2 | 0.24  | 0.27 |
| - | 10 | -14 | 2  | 0.17  | 0.26 |
| - | 10 | 14  | 1  | -0.03 | 0.30 |
|   | 10 | 14  | -1 | -0.42 | 0.43 |
|   | 10 | -14 | -1 | 0.28  | 0.29 |
| - | 10 | -14 | 1  | 0.19  | 0.27 |
|   | 10 | 14  | 0  | -0.38 | 0.44 |
| - | 10 | 14  | 0  | 0.54  | 0.34 |
| - | 10 | -14 | 0  | 0.40  | 0.29 |
|   | 10 | -14 | 0  | 0.46  | 0.29 |
|   | 10 | 14  | 1  | -0.65 | 0.44 |
| - | 10 | 14  | -1 | 0.68  | 0.32 |
| - | 10 | -14 | -1 | 0.96  | 0.31 |
|   | 10 | -14 | 1  | 0.80  | 0.31 |
| - | 10 | 14  | -2 | 0.15  | 0.34 |
|   | 10 | 14  | 2  | -1.17 | 0.43 |
| - | 10 | -14 | -2 | 0.16  | 0.32 |
|   | 10 | -14 | 2  | 0.05  | 0.31 |
| - | 10 | 14  | -3 | -0.18 | 0.35 |
|   | 10 | -14 | 3  | -0.22 | 0.32 |
|   | 10 | -14 | 3  | 0.53  | 0.40 |
| - | 10 | -14 | -3 | -0.02 | 0.33 |
| - | 10 | 14  | -4 | -0.33 | 0.36 |
| - | 10 | -14 | -4 | 0.19  | 0.34 |
|   | 10 | -14 | 4  | -0.20 | 0.34 |
|   | 10 | -14 | 4  | 0.56  | 0.43 |
| - | 10 | 14  | -5 | 0.17  | 0.37 |
|   | 10 | -14 | 5  | 1.47  | 0.44 |
|   | 10 | 15  | -8 | 0.79  | 0.51 |

|    |     |     |       |       |      |
|----|-----|-----|-------|-------|------|
| 10 | -15 | -8  | 0.67  | 0.38  |      |
| 10 | 15  | -7  | 0.56  | 0.52  |      |
| 10 | -15 | -7  | 1.14  | 0.37  |      |
| 10 | 15  | -6  | 0.56  | 0.50  |      |
| 10 | -15 | -6  | 0.54  | 0.35  |      |
| 10 | 15  | -5  | -0.04 | 0.47  |      |
| 10 | -15 | -5  | 0.12  | 0.33  |      |
| -  | 10  | 15  | 4     | 0.04  | 0.31 |
| 10 | 15  | -4  | -0.16 | 0.43  |      |
| 10 | -15 | -4  | 0.31  | 0.32  |      |
| -  | 10  | 15  | 3     | 0.36  | 0.30 |
| 10 | 15  | -3  | 0.23  | 0.46  |      |
| 10 | -15 | -3  | 0.75  | 0.31  |      |
| 10 | 15  | -2  | 0.86  | 0.46  |      |
| -  | 10  | 15  | 2     | 1.15  | 0.34 |
| -  | 10  | -15 | 2     | 1.64  | 0.29 |
| 10 | -15 | -2  | 1.60  | 0.32  |      |
| -  | 10  | 15  | 1     | 0.70  | 0.34 |
| 10 | 15  | -1  | 0.30  | 0.48  |      |
| 10 | -15 | -1  | 0.79  | 0.32  |      |
| -  | 10  | -15 | 1     | 0.93  | 0.29 |
| 10 | 15  | 0   | -0.88 | 0.43  |      |
| -  | 10  | 15  | 0     | 0.22  | 0.34 |
| -  | 10  | -15 | 0     | 0.43  | 0.30 |
| 10 | -15 | 0   | 0.10  | 0.31  |      |
| -  | 10  | 15  | -1    | 1.07  | 0.34 |
| 10 | 15  | 1   | -0.15 | 0.48  |      |
| -  | 10  | -15 | -1    | 1.17  | 0.33 |
| 10 | -15 | 1   | 0.89  | 0.33  |      |
| -  | 10  | 15  | -2    | -0.20 | 0.35 |
| 10 | -15 | 2   | 0.17  | 0.30  |      |
| -  | 10  | -15 | -2    | 0.37  | 0.33 |
| -  | 10  | 15  | -3    | 0.16  | 0.37 |
| 10 | -15 | 3   | 0.31  | 0.34  |      |
| -  | 10  | -15 | -3    | 0.31  | 0.34 |
| -  | 10  | 15  | -4    | -0.03 | 0.37 |
| 10 | -15 | 5   | 1.63  | 0.48  |      |
| 10 | 16  | -7  | -0.03 | 0.53  |      |
| 10 | -16 | -7  | -0.03 | 0.37  |      |
| 10 | 16  | -6  | -0.11 | 0.52  |      |
| 10 | -16 | -6  | 0.04  | 0.33  |      |
| 10 | 16  | -5  | 0.08  | 0.49  |      |
| 10 | -16 | -5  | 0.14  | 0.32  |      |
| 10 | 16  | -4  | 1.48  | 0.50  |      |
| 10 | -16 | -4  | 1.17  | 0.35  |      |
| -  | 10  | 16  | 3     | 0.24  | 0.31 |
| 10 | 16  | -3  | -0.01 | 0.48  |      |
| 10 | -16 | -3  | 0.37  | 0.30  |      |
| -  | 10  | 16  | 2     | 1.33  | 0.33 |
| 10 | 16  | -2  | 0.88  | 0.48  |      |
| 10 | -16 | -2  | 1.52  | 0.31  |      |
| -  | 10  | -16 | 2     | 1.51  | 0.30 |
| 10 | 16  | -1  | -0.24 | 0.45  |      |
| -  | 10  | 16  | 1     | -0.07 | 0.35 |

|    |     |     |       |       |
|----|-----|-----|-------|-------|
| 10 | -16 | -1  | 0.09  | 0.30  |
| -  | 10  | -16 | 1     | 0.41  |
| 10 | 16  | 0   | -0.99 | 0.45  |
| -  | 10  | 16  | 0     | -0.04 |
| 10 | -16 | 0   | 0.22  | 0.33  |
| -  | 10  | -16 | 0     | 0.35  |
| -  | 10  | 16  | -1    | 0.49  |
| 10 | -16 | 1   | 0.50  | 0.34  |
| -  | 10  | -16 | -1    | 1.02  |
| -  | 10  | 16  | -2    | 0.09  |
| 10 | -16 | 2   | 0.18  | 0.35  |
| -  | 10  | -16 | -2    | 0.10  |
| -  | 10  | 16  | -3    | -0.02 |
| -  | 10  | 16  | -4    | 0.22  |
| 10 | 17  | -6  | 0.08  | 0.54  |
| 10 | 17  | -5  | 0.51  | 0.53  |
| 10 | -17 | -5  | 0.55  | 0.34  |
| 10 | 17  | -4  | -0.15 | 0.50  |
| 10 | -17 | -4  | 0.24  | 0.36  |
| 10 | 17  | -3  | -0.17 | 0.49  |
| 10 | -17 | -3  | -0.05 | 0.35  |
| -  | 10  | 17  | 2     | -0.01 |
| 10 | 17  | -2  | -0.35 | 0.48  |
| 10 | -17 | -2  | -0.11 | 0.35  |
| 10 | 17  | -1  | -0.35 | 0.47  |
| -  | 10  | 17  | 1     | 0.37  |
| 10 | -17 | -1  | 0.08  | 0.31  |
| -  | 10  | -17 | 1     | 0.74  |
| -  | 10  | 17  | 0     | -0.04 |
| 10 | -17 | 0   | 0.27  | 0.34  |
| -  | 10  | -17 | 0     | 0.40  |
| -  | 10  | 17  | -1    | 1.62  |
| -  | 10  | -17 | -1    | 2.38  |
| -  | 10  | 17  | -2    | -0.30 |
| 10 | 18  | -4  | 0.45  | 0.52  |
| 10 | 18  | -3  | -0.32 | 0.49  |
| 10 | 18  | -2  | -0.29 | 0.48  |
| -  | 10  | -18 | 1     | 0.55  |
| -  | 10  | -18 | 0     | 0.81  |
| 11 | 0   | -14 | -0.92 | 0.43  |
| 11 | 0   | -13 | -1.14 | 0.40  |
| 11 | 0   | -12 | -0.79 | 0.37  |
| 11 | 0   | -11 | -0.86 | 0.34  |
| 11 | 0   | -10 | 0.04  | 0.34  |
| 11 | 0   | -9  | -0.92 | 0.28  |
| 11 | 0   | -9  | 0.07  | 0.29  |
| 11 | 0   | -8  | 1.18  | 0.32  |
| 11 | 0   | -8  | 0.51  | 0.28  |
| -  | 11  | 0   | 7     | -0.13 |
| 11 | 0   | -7  | -0.34 | 0.28  |
| 11 | 0   | -7  | -0.65 | 0.24  |
| 11 | 0   | -6  | 11.72 | 0.69  |
| -  | 11  | 0   | 6     | 11.12 |
| 11 | 0   | -6  | 11.56 | 0.55  |

|    |    |     |       |       |
|----|----|-----|-------|-------|
| 11 | 0  | -5  | -0.57 | 0.21  |
| 11 | 0  | -5  | -0.33 | 0.28  |
| -  | 11 | 0   | 5     | -0.23 |
| -  | 11 | 0   | 4     | 7.21  |
| 11 | 0  | -4  | 6.19  | 0.53  |
| -  | 11 | 0   | 3     | -0.07 |
| 11 | 0  | -3  | -0.20 | 0.31  |
| 11 | 0  | -2  | 7.92  | 0.59  |
| -  | 11 | 0   | 2     | 7.73  |
| -  | 11 | 0   | 1     | -0.09 |
| 11 | 0  | -1  | 0.00  | 0.32  |
| -  | 11 | 0   | 0     | 2.01  |
| 11 | 0  | 0   | 2.21  | 0.34  |
| 11 | 0  | 1   | -0.13 | 0.29  |
| -  | 11 | 0   | -1    | -0.04 |
| -  | 11 | 0   | -2    | 0.43  |
| 11 | 0  | 2   | 0.42  | 0.31  |
| -  | 11 | 0   | -3    | -0.09 |
| 11 | 0  | 3   | -0.05 | 0.31  |
| -  | 11 | 0   | -4    | 0.75  |
| 11 | 0  | 4   | 0.84  | 0.33  |
| 11 | 0  | 5   | 0.12  | 0.37  |
| -  | 11 | 0   | -5    | 0.02  |
| 11 | 0  | 6   | 2.42  | 0.43  |
| -  | 11 | 0   | -6    | 1.95  |
| 11 | 0  | 7   | 0.40  | 0.42  |
| -  | 11 | 0   | -7    | -0.03 |
| -  | 11 | 0   | -8    | 1.84  |
| 11 | 0  | 8   | 2.06  | 0.48  |
| 11 | 1  | -14 | -1.07 | 0.42  |
| 11 | 1  | -13 | 0.15  | 0.40  |
| 11 | -1 | -13 | 0.67  | 0.43  |
| 11 | 1  | -12 | -0.16 | 0.36  |
| 11 | -1 | -12 | -0.52 | 0.38  |
| 11 | 1  | -11 | -0.53 | 0.33  |
| 11 | -1 | -11 | -0.03 | 0.35  |
| 11 | 1  | -10 | -0.40 | 0.33  |
| 11 | 1  | -10 | -0.75 | 0.30  |
| 11 | -1 | -10 | -1.03 | 0.33  |
| 11 | 1  | -9  | 0.99  | 0.31  |
| 11 | 1  | -9  | 1.97  | 0.33  |
| 11 | -1 | -9  | 1.68  | 0.33  |
| 11 | 1  | -8  | 0.21  | 0.30  |
| 11 | 1  | -8  | -0.45 | 0.26  |
| 11 | -1 | -8  | -0.49 | 0.29  |
| 11 | -1 | -8  | 0.14  | 0.29  |
| 11 | 1  | -7  | 0.94  | 0.31  |
| -  | 11 | 1   | 7     | 0.76  |
| 11 | -1 | -7  | 0.42  | 0.27  |
| 11 | -1 | -7  | 0.88  | 0.28  |
| -  | 11 | 1   | 6     | 3.36  |
| 11 | 1  | -6  | 3.67  | 0.46  |
| -  | 11 | -1  | 6     | 2.70  |
| 11 | -1 | -6  | 3.71  | 0.43  |

|    |    |    |       |       |
|----|----|----|-------|-------|
| 11 | -1 | -6 | 3.71  | 0.31  |
| 11 | 1  | -5 | 0.27  | 0.30  |
| -  | 11 | 1  | 5     | 0.56  |
| 11 | -1 | -5 | 0.35  | 0.22  |
| 11 | -1 | -5 | 0.53  | 0.28  |
| -  | 11 | -1 | 5     | 0.42  |
| 11 | 1  | -4 | 1.56  | 0.34  |
| -  | 11 | 1  | 4     | 1.92  |
| 11 | -1 | -4 | 2.33  | 0.24  |
| 11 | -1 | -4 | 1.97  | 0.32  |
| -  | 11 | -1 | 4     | 1.99  |
| -  | 11 | 1  | 3     | 3.63  |
| 11 | 1  | -3 | 3.68  | 0.45  |
| -  | 11 | -1 | 3     | 4.45  |
| 11 | -1 | -3 | 4.97  | 0.38  |
| 11 | -1 | -3 | 4.04  | 0.47  |
| -  | 11 | 1  | 2     | -0.19 |
| 11 | 1  | -2 | -0.35 | 0.29  |
| -  | 11 | -1 | 2     | -0.09 |
| 11 | -1 | -2 | -0.17 | 0.30  |
| 11 | 1  | -1 | 1.55  | 0.36  |
| -  | 11 | 1  | 1     | 1.35  |
| 11 | -1 | -1 | 1.28  | 0.32  |
| -  | 11 | -1 | 1     | 1.42  |
| 11 | 1  | 0  | 0.66  | 0.33  |
| -  | 11 | 1  | 0     | 0.37  |
| 11 | -1 | 0  | 0.80  | 0.30  |
| -  | 11 | -1 | 0     | 0.63  |
| 11 | 1  | 1  | 1.54  | 0.36  |
| -  | 11 | 1  | -1    | 1.32  |
| 11 | -1 | 1  | 1.61  | 0.34  |
| -  | 11 | -1 | -1    | 1.36  |
| -  | 11 | 1  | -2    | -0.30 |
| 11 | 1  | 2  | 0.33  | 0.33  |
| 11 | -1 | 2  | -0.12 | 0.33  |
| -  | 11 | -1 | -2    | 0.06  |
| -  | 11 | 1  | -3    | 0.16  |
| 11 | 1  | 3  | -0.04 | 0.32  |
| 11 | -1 | 3  | 0.12  | 0.34  |
| -  | 11 | -1 | -3    | 0.13  |
| -  | 11 | 1  | -4    | 0.13  |
| 11 | 1  | 4  | 0.58  | 0.33  |
| 11 | -1 | 4  | 0.19  | 0.33  |
| -  | 11 | -1 | -4    | 0.49  |
| -  | 11 | 1  | -5    | 4.56  |
| 11 | 1  | 5  | 4.27  | 0.49  |
| 11 | -1 | 5  | 4.46  | 0.50  |
| -  | 11 | -1 | -5    | 4.41  |
| -  | 11 | 1  | -6    | 0.54  |
| 11 | 1  | 6  | 0.91  | 0.40  |
| 11 | -1 | 6  | 0.75  | 0.41  |
| -  | 11 | -1 | -6    | 0.26  |
| -  | 11 | 1  | -7    | 0.47  |
| 11 | 1  | 7  | 0.71  | 0.41  |

|    |    |     |       |       |
|----|----|-----|-------|-------|
| 11 | -1 | 7   | 1.04  | 0.45  |
| -  | 11 | -1  | -7    | 0.61  |
| -  | 11 | 1   | -8    | 0.40  |
| 11 | 1  | 8   | 0.65  | 0.44  |
| -  | 11 | -1  | -8    | 0.20  |
| 11 | -1 | 8   | 1.16  | 0.47  |
| 11 | 2  | -13 | -1.20 | 0.37  |
| 11 | -2 | -13 | -1.00 | 0.41  |
| 11 | 2  | -12 | 1.28  | 0.39  |
| 11 | -2 | -12 | 2.25  | 0.43  |
| 11 | 2  | -11 | 0.15  | 0.34  |
| 11 | 2  | -11 | 0.61  | 0.34  |
| 11 | -2 | -11 | 0.39  | 0.38  |
| 11 | 2  | -10 | 5.00  | 0.53  |
| 11 | -2 | -10 | 5.52  | 0.55  |
| 11 | 2  | -9  | 1.23  | 0.33  |
| 11 | -2 | -9  | 1.15  | 0.33  |
| 11 | 2  | -8  | 0.80  | 0.32  |
| 11 | -2 | -8  | 1.09  | 0.28  |
| 11 | -2 | -8  | 0.72  | 0.32  |
| -  | 11 | 2   | 7     | 0.07  |
| 11 | 2  | -7  | -0.18 | 0.30  |
| 11 | -2 | -7  | -0.50 | 0.26  |
| 11 | -2 | -7  | 0.04  | 0.26  |
| 11 | 2  | -6  | 15.27 | 0.85  |
| -  | 11 | 2   | 6     | 15.68 |
| -  | 11 | -2  | 6     | 16.37 |
| 11 | -2 | -6  | 18.01 | 0.71  |
| 11 | -2 | -6  | 15.78 | 0.81  |
| 11 | 2  | -5  | -0.23 | 0.31  |
| -  | 11 | 2   | 5     | -0.34 |
| 11 | -2 | -5  | -0.20 | 0.22  |
| -  | 11 | -2  | 5     | 0.02  |
| 11 | -2 | -5  | 0.09  | 0.27  |
| -  | 11 | 2   | 4     | -0.43 |
| 11 | 2  | -4  | -0.45 | 0.31  |
| -  | 11 | -2  | 4     | -0.07 |
| 11 | -2 | -4  | -0.24 | 0.28  |
| 11 | -2 | -4  | -0.15 | 0.22  |
| 11 | 2  | -3  | 0.45  | 0.31  |
| -  | 11 | 2   | 3     | 0.53  |
| 11 | -2 | -3  | 0.55  | 0.29  |
| 11 | -2 | -3  | 0.93  | 0.22  |
| -  | 11 | -2  | 3     | 0.79  |
| -  | 11 | 2   | 2     | 0.62  |
| 11 | 2  | -2  | 0.75  | 0.32  |
| 11 | -2 | -2  | 1.26  | 0.31  |
| -  | 11 | -2  | 2     | 0.71  |
| 11 | -2 | -2  | 0.98  | 0.20  |
| 11 | 2  | -1  | 1.25  | 0.34  |
| -  | 11 | 2   | 1     | 1.37  |
| 11 | -2 | -1  | 1.79  | 0.33  |
| 11 | -2 | -1  | 1.08  | 0.20  |
| -  | 11 | -2  | 1     | 1.04  |

|   |    |    |     |       |      |
|---|----|----|-----|-------|------|
| - | 11 | 2  | 0   | 3.03  | 0.37 |
|   | 11 | 2  | 0   | 3.21  | 0.46 |
|   | 11 | -2 | 0   | 3.13  | 0.41 |
| - | 11 | -2 | 0   | 3.21  | 0.34 |
|   | 11 | 2  | 1   | -0.06 | 0.30 |
| - | 11 | 2  | -1  | 0.02  | 0.26 |
| - | 11 | -2 | -1  | 0.11  | 0.26 |
|   | 11 | -2 | 1   | 0.04  | 0.32 |
| - | 11 | 2  | -2  | 1.63  | 0.30 |
|   | 11 | 2  | 2   | 2.15  | 0.38 |
| - | 11 | -2 | -2  | 1.72  | 0.27 |
|   | 11 | -2 | 2   | 2.01  | 0.35 |
|   | 11 | 2  | 3   | 5.21  | 0.54 |
| - | 11 | 2  | -3  | 4.65  | 0.51 |
| - | 11 | -2 | -3  | 5.15  | 0.42 |
|   | 11 | -2 | 3   | 4.72  | 0.47 |
|   | 11 | 2  | 4   | 3.31  | 0.42 |
| - | 11 | 2  | -4  | 2.57  | 0.37 |
| - | 11 | -2 | -4  | 2.48  | 0.34 |
|   | 11 | -2 | 4   | 2.77  | 0.41 |
| - | 11 | 2  | -5  | -0.05 | 0.35 |
|   | 11 | 2  | 5   | 0.25  | 0.38 |
|   | 11 | -2 | 5   | 0.37  | 0.40 |
| - | 11 | -2 | -5  | 0.24  | 0.29 |
| - | 11 | 2  | -6  | 0.00  | 0.38 |
|   | 11 | 2  | 6   | 0.49  | 0.39 |
|   | 11 | -2 | 6   | 0.92  | 0.43 |
| - | 11 | -2 | -6  | 0.28  | 0.34 |
|   | 11 | 2  | 7   | 0.50  | 0.41 |
| - | 11 | 2  | -7  | -0.60 | 0.39 |
| - | 11 | -2 | -7  | 0.47  | 0.37 |
|   | 11 | -2 | 7   | 0.46  | 0.42 |
|   | 11 | 2  | 8   | 0.48  | 0.43 |
| - | 11 | 2  | -8  | 0.04  | 0.43 |
| - | 11 | -2 | -8  | 0.16  | 0.39 |
|   | 11 | -3 | -13 | -0.21 | 0.43 |
|   | 11 | -3 | -12 | 0.25  | 0.40 |
|   | 11 | 3  | -11 | 0.11  | 0.35 |
|   | 11 | -3 | -11 | -0.13 | 0.38 |
|   | 11 | 3  | -10 | 0.13  | 0.37 |
|   | 11 | -3 | -10 | -0.36 | 0.35 |
|   | 11 | 3  | -9  | -0.16 | 0.33 |
|   | 11 | -3 | -9  | -0.47 | 0.31 |
|   | 11 | 3  | -8  | 3.03  | 0.38 |
|   | 11 | -3 | -8  | 2.78  | 0.34 |
| - | 11 | 3  | 7   | 0.15  | 0.21 |
|   | 11 | 3  | -7  | 0.16  | 0.33 |
|   | 11 | -3 | -7  | -0.32 | 0.28 |
|   | 11 | -3 | -7  | 0.01  | 0.25 |
|   | 11 | 3  | -6  | -0.07 | 0.29 |
| - | 11 | 3  | 6   | 0.04  | 0.21 |
|   | 11 | -3 | -6  | -0.15 | 0.27 |
|   | 11 | -3 | -6  | -0.03 | 0.27 |
| - | 11 | -3 | 6   | -0.12 | 0.21 |

|    |    |    |       |       |      |
|----|----|----|-------|-------|------|
| 11 | 3  | -5 | 4.18  | 0.52  |      |
| -  | 11 | 3  | 5     | 4.31  | 0.34 |
| 11 | -3 | -5 | 4.74  | 0.41  |      |
| -  | 11 | -3 | 5     | 4.90  | 0.36 |
| 11 | -3 | -5 | 4.27  | 0.46  |      |
| 11 | 3  | -4 | 2.84  | 0.39  |      |
| -  | 11 | 3  | 4     | 2.86  | 0.28 |
| 11 | -3 | -4 | 2.78  | 0.33  |      |
| -  | 11 | -3 | 4     | 3.25  | 0.34 |
| 11 | -3 | -4 | 3.31  | 0.37  |      |
| 11 | 3  | -3 | 1.50  | 0.37  |      |
| -  | 11 | 3  | 3     | 2.04  | 0.27 |
| 11 | -3 | -3 | 2.07  | 0.32  |      |
| -  | 11 | -3 | 3     | 2.29  | 0.25 |
| 11 | -3 | -3 | 2.47  | 0.25  |      |
| -  | 11 | 3  | 2     | 1.50  | 0.26 |
| 11 | 3  | -2 | 1.38  | 0.39  |      |
| 11 | -3 | -2 | 2.12  | 0.32  |      |
| 11 | -3 | -2 | 2.14  | 0.22  |      |
| -  | 11 | -3 | 2     | 1.73  | 0.25 |
| 11 | 3  | -1 | -0.36 | 0.35  |      |
| -  | 11 | 3  | 1     | 0.03  | 0.23 |
| 11 | -3 | -1 | 0.05  | 0.18  |      |
| 11 | -3 | -1 | 0.08  | 0.30  |      |
| -  | 11 | -3 | 1     | 0.13  | 0.21 |
| 11 | 3  | 0  | 6.29  | 0.60  |      |
| -  | 11 | 3  | 0     | 6.07  | 0.45 |
| 11 | -3 | 0  | 6.70  | 0.52  |      |
| -  | 11 | -3 | 0     | 5.68  | 0.44 |
| 11 | -3 | 0  | 6.77  | 0.40  |      |
| 11 | 3  | 1  | 2.22  | 0.38  |      |
| -  | 11 | 3  | -1    | 2.01  | 0.29 |
| 11 | -3 | 1  | 1.93  | 0.22  |      |
| -  | 11 | -3 | -1    | 2.17  | 0.29 |
| 11 | -3 | 1  | 1.85  | 0.32  |      |
| -  | 11 | 3  | -2    | 4.47  | 0.49 |
| 11 | 3  | 2  | 4.68  | 0.56  |      |
| 11 | -3 | 2  | 4.82  | 0.50  |      |
| -  | 11 | -3 | -2    | 4.98  | 0.40 |
| 11 | 3  | 3  | 1.53  | 0.38  |      |
| -  | 11 | 3  | -3    | 1.54  | 0.34 |
| 11 | -3 | 3  | 1.79  | 0.38  |      |
| -  | 11 | -3 | -3    | 1.43  | 0.31 |
| -  | 11 | 3  | -4    | 2.03  | 0.37 |
| 11 | 3  | 4  | 2.44  | 0.39  |      |
| 11 | -3 | 4  | 2.08  | 0.41  |      |
| -  | 11 | -3 | -4    | 1.77  | 0.30 |
| -  | 11 | 3  | -5    | 2.04  | 0.35 |
| 11 | 3  | 5  | 1.76  | 0.37  |      |
| -  | 11 | -3 | -5    | 1.70  | 0.34 |
| 11 | -3 | 5  | 1.50  | 0.40  |      |
| 11 | 3  | 6  | 0.39  | 0.41  |      |
| -  | 11 | 3  | -6    | -0.13 | 0.38 |
| -  | 11 | -3 | -6    | 0.00  | 0.34 |

|    |    |     |       |       |
|----|----|-----|-------|-------|
| 11 | -3 | 6   | 0.45  | 0.40  |
| -  | 11 | 3   | -7    | -0.48 |
| 11 | 3  | 7   | 0.35  | 0.41  |
| 11 | -3 | 7   | 0.76  | 0.46  |
| -  | 11 | -3  | -7    | -0.02 |
| -  | 11 | 3   | -8    | -0.11 |
| 11 | 3  | 8   | 0.45  | 0.43  |
| -  | 11 | -3  | -8    | 0.03  |
| 11 | -4 | -13 | -1.09 | 0.42  |
| 11 | 4  | -12 | 0.08  | 0.41  |
| 11 | -4 | -12 | -0.51 | 0.40  |
| 11 | 4  | -11 | 0.62  | 0.39  |
| 11 | -4 | -11 | 0.92  | 0.37  |
| 11 | 4  | -10 | 0.54  | 0.37  |
| 11 | -4 | -10 | 0.43  | 0.36  |
| 11 | 4  | -9  | -0.17 | 0.34  |
| 11 | -4 | -9  | -0.40 | 0.33  |
| 11 | 4  | -8  | 1.36  | 0.36  |
| -  | 11 | 4   | 8     | 1.36  |
| 11 | -4 | -8  | 1.47  | 0.30  |
| -  | 11 | 4   | 7     | 3.41  |
| 11 | 4  | -7  | 3.13  | 0.40  |
| 11 | -4 | -7  | 2.85  | 0.33  |
| -  | 11 | 4   | 6     | 7.72  |
| 11 | 4  | -6  | 6.96  | 0.56  |
| 11 | -4 | -6  | 7.84  | 0.50  |
| 11 | -4 | -6  | 8.88  | 0.51  |
| -  | 11 | 4   | 5     | 0.92  |
| 11 | 4  | -5  | 1.15  | 0.33  |
| 11 | -4 | -5  | 1.05  | 0.27  |
| -  | 11 | -4  | 5     | 1.31  |
| 11 | -4 | -5  | 1.38  | 0.27  |
| -  | 11 | 4   | 4     | 0.45  |
| 11 | 4  | -4  | 0.34  | 0.36  |
| -  | 11 | -4  | 4     | 0.70  |
| 11 | -4 | -4  | 0.76  | 0.27  |
| 11 | -4 | -4  | 1.11  | 0.24  |
| 11 | 4  | -3  | -0.54 | 0.35  |
| -  | 11 | 4   | 3     | -0.25 |
| 11 | -4 | -3  | 0.16  | 0.28  |
| -  | 11 | -4  | 3     | 0.32  |
| 11 | -4 | -3  | 0.23  | 0.21  |
| -  | 11 | 4   | 2     | 0.58  |
| 11 | 4  | -2  | 0.41  | 0.34  |
| -  | 11 | -4  | 2     | 1.13  |
| 11 | -4 | -2  | 0.91  | 0.21  |
| 11 | -4 | -2  | 1.07  | 0.29  |
| 11 | 4  | -1  | 4.44  | 0.58  |
| -  | 11 | 4   | 1     | 3.85  |
| -  | 11 | -4  | 1     | 4.82  |
| 11 | -4 | -1  | 5.58  | 0.47  |
| 11 | -4 | -1  | 5.11  | 0.36  |
| 11 | 4  | 0   | 1.28  | 0.39  |
| -  | 11 | 4   | 0     | 0.49  |

|   |    |    |     |       |      |
|---|----|----|-----|-------|------|
| - | 11 | -4 | 0   | 0.63  | 0.23 |
|   | 11 | -4 | 0   | 1.15  | 0.32 |
|   | 11 | -4 | 0   | 0.78  | 0.21 |
| - | 11 | 4  | -1  | 2.04  | 0.32 |
|   | 11 | 4  | 1   | 2.65  | 0.41 |
|   | 11 | -4 | 1   | 2.62  | 0.35 |
| - | 11 | -4 | -1  | 2.33  | 0.27 |
|   | 11 | -4 | 1   | 2.56  | 0.24 |
|   | 11 | 4  | 2   | 0.97  | 0.37 |
| - | 11 | 4  | -2  | 0.71  | 0.32 |
|   | 11 | -4 | 2   | 1.25  | 0.21 |
| - | 11 | -4 | -2  | 1.25  | 0.28 |
|   | 11 | -4 | 2   | 1.54  | 0.35 |
|   | 11 | 4  | 3   | -0.11 | 0.37 |
| - | 11 | 4  | -3  | -0.09 | 0.30 |
| - | 11 | -4 | -3  | 0.23  | 0.28 |
|   | 11 | -4 | 3   | -0.26 | 0.36 |
|   | 11 | 4  | 4   | 0.26  | 0.37 |
| - | 11 | 4  | -4  | -0.28 | 0.35 |
|   | 11 | -4 | 4   | 0.44  | 0.40 |
| - | 11 | -4 | -4  | 0.09  | 0.30 |
| - | 11 | 4  | -5  | -0.84 | 0.36 |
|   | 11 | 4  | 5   | 0.13  | 0.38 |
| - | 11 | -4 | -5  | 0.13  | 0.32 |
|   | 11 | -4 | 5   | 0.04  | 0.37 |
|   | 11 | 4  | 6   | 0.69  | 0.40 |
| - | 11 | 4  | -6  | 0.08  | 0.39 |
| - | 11 | -4 | -6  | 0.51  | 0.35 |
|   | 11 | -4 | 6   | 0.63  | 0.41 |
| - | 11 | 4  | -7  | -0.64 | 0.40 |
|   | 11 | 4  | 7   | 0.63  | 0.42 |
| - | 11 | -4 | -7  | 0.15  | 0.37 |
|   | 11 | -4 | 7   | 0.76  | 0.43 |
|   | 11 | 4  | 8   | 0.55  | 0.43 |
| - | 11 | -4 | -8  | -0.31 | 0.39 |
|   | 11 | 5  | -13 | 1.40  | 0.43 |
|   | 11 | -5 | -13 | 1.15  | 0.45 |
|   | 11 | 5  | -12 | 0.41  | 0.40 |
|   | 11 | -5 | -12 | 0.16  | 0.42 |
|   | 11 | 5  | -11 | 0.24  | 0.38 |
|   | 11 | -5 | -11 | 0.08  | 0.38 |
|   | 11 | 5  | -10 | -0.24 | 0.37 |
|   | 11 | -5 | -10 | -0.37 | 0.35 |
|   | 11 | 5  | -9  | 0.97  | 0.37 |
|   | 11 | -5 | -9  | 1.34  | 0.35 |
| - | 11 | 5  | 8   | 1.10  | 0.25 |
|   | 11 | 5  | -8  | 0.99  | 0.38 |
|   | 11 | -5 | -8  | 1.36  | 0.33 |
|   | 11 | 5  | -7  | 6.15  | 0.59 |
| - | 11 | 5  | 7   | 6.48  | 0.46 |
|   | 11 | -5 | -7  | 6.39  | 0.50 |
| - | 11 | 5  | 6   | 4.51  | 0.39 |
|   | 11 | 5  | -6  | 4.56  | 0.49 |
|   | 11 | -5 | -6  | 4.42  | 0.45 |

|   |    |    |    |       |      |
|---|----|----|----|-------|------|
| - | 11 | 5  | 5  | 1.13  | 0.24 |
|   | 11 | 5  | -5 | 1.06  | 0.38 |
|   | 11 | -5 | -5 | 1.39  | 0.26 |
|   | 11 | -5 | -5 | 0.94  | 0.27 |
| - | 11 | -5 | 5  | 1.15  | 0.24 |
| - | 11 | 5  | 4  | 3.67  | 0.39 |
|   | 11 | 5  | -4 | 3.42  | 0.45 |
|   | 11 | -5 | -4 | 3.78  | 0.39 |
| - | 11 | -5 | 4  | 4.09  | 0.34 |
|   | 11 | -5 | -4 | 3.47  | 0.43 |
|   | 11 | 5  | -3 | -0.49 | 0.36 |
| - | 11 | 5  | 3  | 0.38  | 0.25 |
|   | 11 | -5 | -3 | 0.47  | 0.22 |
| - | 11 | -5 | 3  | 0.68  | 0.22 |
|   | 11 | -5 | -3 | 0.74  | 0.29 |
| - | 11 | 5  | 2  | 1.77  | 0.27 |
|   | 11 | 5  | -2 | 1.09  | 0.40 |
|   | 11 | -5 | -2 | 2.37  | 0.32 |
| - | 11 | -5 | 2  | 2.02  | 0.26 |
|   | 11 | -5 | -2 | 2.30  | 0.24 |
|   | 11 | 5  | -1 | 2.41  | 0.43 |
| - | 11 | 5  | 1  | 2.27  | 0.29 |
|   | 11 | -5 | -1 | 3.50  | 0.41 |
|   | 11 | -5 | -1 | 3.19  | 0.34 |
| - | 11 | -5 | 1  | 2.43  | 0.28 |
|   | 11 | 5  | 0  | 6.19  | 0.63 |
| - | 11 | 5  | 0  | 5.86  | 0.44 |
| - | 11 | -5 | 0  | 6.60  | 0.45 |
|   | 11 | -5 | 0  | 6.43  | 0.39 |
|   | 11 | -5 | 0  | 6.38  | 0.51 |
|   | 11 | 5  | 1  | 2.29  | 0.42 |
| - | 11 | 5  | -1 | 2.03  | 0.33 |
|   | 11 | -5 | 1  | 2.81  | 0.36 |
| - | 11 | -5 | -1 | 2.60  | 0.30 |
|   | 11 | -5 | 1  | 2.35  | 0.24 |
|   | 11 | 5  | 2  | -0.11 | 0.37 |
| - | 11 | 5  | -2 | -0.68 | 0.31 |
| - | 11 | -5 | -2 | 0.06  | 0.27 |
|   | 11 | -5 | 2  | 0.55  | 0.35 |
|   | 11 | -5 | 2  | -0.19 | 0.21 |
|   | 11 | 5  | 3  | 0.46  | 0.38 |
| - | 11 | 5  | -3 | 0.67  | 0.34 |
|   | 11 | -5 | 3  | 1.32  | 0.39 |
| - | 11 | -5 | -3 | 1.21  | 0.31 |
| - | 11 | 5  | -4 | -0.55 | 0.31 |
|   | 11 | 5  | 4  | -0.13 | 0.38 |
|   | 11 | -5 | 4  | 0.19  | 0.40 |
| - | 11 | -5 | -4 | 0.05  | 0.28 |
| - | 11 | 5  | -5 | -0.39 | 0.33 |
|   | 11 | 5  | 5  | -0.18 | 0.39 |
| - | 11 | -5 | -5 | 0.33  | 0.29 |
|   | 11 | -5 | 5  | -0.24 | 0.38 |
|   | 11 | 5  | 6  | 2.14  | 0.43 |
| - | 11 | 5  | -6 | 1.70  | 0.42 |

|   |    |    |     |       |      |
|---|----|----|-----|-------|------|
| - | 11 | -5 | -6  | 2.13  | 0.34 |
|   | 11 | -5 | 6   | 1.81  | 0.47 |
|   | 11 | 5  | 7   | 1.63  | 0.44 |
| - | 11 | 5  | -7  | 1.11  | 0.43 |
|   | 11 | -5 | 7   | 1.71  | 0.49 |
| - | 11 | -5 | -7  | 1.63  | 0.38 |
|   | 11 | 5  | 8   | 0.21  | 0.42 |
| - | 11 | -5 | -8  | 0.32  | 0.39 |
|   | 11 | 6  | -13 | 0.67  | 0.43 |
|   | 11 | 6  | -12 | -0.10 | 0.42 |
|   | 11 | -6 | -12 | -0.33 | 0.41 |
|   | 11 | 6  | -11 | 9.28  | 0.72 |
|   | 11 | -6 | -11 | 11.09 | 0.69 |
|   | 11 | 6  | -10 | 1.55  | 0.43 |
|   | 11 | -6 | -10 | 2.09  | 0.36 |
|   | 11 | 6  | -9  | 2.13  | 0.41 |
|   | 11 | -6 | -9  | 2.24  | 0.37 |
|   | 11 | 6  | -8  | 0.00  | 0.38 |
| - | 11 | 6  | 8   | 0.10  | 0.25 |
|   | 11 | -6 | -8  | -0.23 | 0.31 |
|   | 11 | 6  | -7  | 0.02  | 0.37 |
| - | 11 | 6  | 7   | -0.19 | 0.23 |
|   | 11 | -6 | -7  | -0.06 | 0.29 |
| - | 11 | 6  | 6   | 1.05  | 0.25 |
|   | 11 | 6  | -6  | 1.13  | 0.39 |
|   | 11 | -6 | -6  | 1.18  | 0.29 |
|   | 11 | 6  | -5  | -0.23 | 0.38 |
| - | 11 | 6  | 5   | 0.26  | 0.24 |
| - | 11 | -6 | 5   | 0.27  | 0.21 |
|   | 11 | -6 | -5  | -0.17 | 0.25 |
|   | 11 | 6  | -4  | -0.37 | 0.39 |
| - | 11 | 6  | 4   | 0.26  | 0.22 |
|   | 11 | -6 | -4  | 0.31  | 0.27 |
|   | 11 | -6 | -4  | 0.10  | 0.24 |
| - | 11 | -6 | 4   | 0.30  | 0.21 |
|   | 11 | 6  | -3  | 4.75  | 0.55 |
| - | 11 | 6  | 3   | 5.76  | 0.45 |
|   | 11 | -6 | -3  | 6.07  | 0.42 |
| - | 11 | -6 | 3   | 5.91  | 0.40 |
|   | 11 | -6 | -3  | 5.90  | 0.46 |
|   | 11 | 6  | -2  | 2.04  | 0.43 |
| - | 11 | 6  | 2   | 2.47  | 0.31 |
| - | 11 | -6 | 2   | 2.35  | 0.26 |
|   | 11 | -6 | -2  | 2.62  | 0.25 |
|   | 11 | -6 | -2  | 2.85  | 0.40 |
|   | 11 | 6  | -1  | 1.73  | 0.39 |
| - | 11 | 6  | 1   | 1.51  | 0.30 |
|   | 11 | -6 | -1  | 2.47  | 0.32 |
|   | 11 | -6 | -1  | 2.15  | 0.24 |
| - | 11 | -6 | 1   | 1.80  | 0.25 |
| - | 11 | 6  | 0   | -0.45 | 0.28 |
|   | 11 | 6  | 0   | -1.03 | 0.39 |
|   | 11 | -6 | 0   | 0.31  | 0.30 |
| - | 11 | -6 | 0   | -0.17 | 0.26 |

|    |    |     |       |       |
|----|----|-----|-------|-------|
| 11 | -6 | 0   | 0.00  | 0.21  |
| -  | 11 | 6   | -1    | -0.27 |
| 11 | 6  | 1   | -0.48 | 0.35  |
| 11 | -6 | 1   | 0.26  | 0.21  |
| 11 | -6 | 1   | 0.23  | 0.32  |
| -  | 11 | -6  | -1    | 0.38  |
| -  | 11 | 6   | -2    | 0.85  |
| 11 | 6  | 2   | 0.79  | 0.37  |
| -  | 11 | -6  | -2    | 1.19  |
| 11 | -6 | 2   | 0.94  | 0.24  |
| 11 | -6 | 2   | 0.97  | 0.33  |
| 11 | 6  | 3   | 3.73  | 0.43  |
| -  | 11 | 6   | -3    | 3.63  |
| 11 | -6 | 3   | 4.21  | 0.54  |
| -  | 11 | -6  | -3    | 4.59  |
| 11 | 6  | 4   | -0.11 | 0.38  |
| -  | 11 | 6   | -4    | -0.27 |
| 11 | -6 | 4   | 0.14  | 0.37  |
| -  | 11 | -6  | -4    | 0.23  |
| -  | 11 | 6   | -5    | -0.20 |
| 11 | 6  | 5   | 0.76  | 0.39  |
| 11 | -6 | 5   | 0.61  | 0.43  |
| -  | 11 | -6  | -5    | 0.53  |
| 11 | 6  | 6   | 0.31  | 0.41  |
| -  | 11 | 6   | -6    | -0.76 |
| -  | 11 | -6  | -6    | -0.01 |
| 11 | -6 | 6   | 0.61  | 0.41  |
| -  | 11 | 6   | -7    | -0.61 |
| 11 | 6  | 7   | -0.06 | 0.42  |
| -  | 11 | -6  | -7    | 0.17  |
| 11 | -6 | 7   | 0.27  | 0.43  |
| 11 | 6  | 8   | 0.24  | 0.44  |
| 11 | 7  | -13 | -0.12 | 0.47  |
| 11 | 7  | -12 | 0.19  | 0.44  |
| 11 | -7 | -12 | 0.13  | 0.42  |
| 11 | 7  | -11 | -0.19 | 0.42  |
| 11 | -7 | -11 | -0.01 | 0.39  |
| 11 | 7  | -10 | 1.43  | 0.40  |
| 11 | -7 | -10 | 1.01  | 0.38  |
| 11 | 7  | -9  | -0.03 | 0.39  |
| 11 | -7 | -9  | 0.15  | 0.35  |
| -  | 11 | 7   | 8     | 1.46  |
| 11 | 7  | -8  | 1.39  | 0.42  |
| 11 | -7 | -8  | 1.63  | 0.33  |
| 11 | 7  | -7  | -0.01 | 0.39  |
| -  | 11 | 7   | 7     | -0.11 |
| 11 | -7 | -7  | -0.27 | 0.29  |
| -  | 11 | 7   | 6     | 0.04  |
| 11 | 7  | -6  | -0.07 | 0.39  |
| 11 | -7 | -6  | -0.25 | 0.25  |
| 11 | 7  | -5  | 0.74  | 0.37  |
| -  | 11 | 7   | 5     | 1.05  |
| 11 | -7 | -5  | 0.74  | 0.28  |
| -  | 11 | -7  | 5     | 1.08  |

|   |    |    |    |       |      |
|---|----|----|----|-------|------|
| - | 11 | 7  | 4  | -0.17 | 0.25 |
|   | 11 | 7  | -4 | -0.45 | 0.39 |
|   | 11 | -7 | -4 | -0.24 | 0.25 |
| - | 11 | -7 | 4  | 0.05  | 0.21 |
| - | 11 | 7  | 3  | 3.86  | 0.42 |
|   | 11 | 7  | -3 | 3.49  | 0.48 |
| - | 11 | -7 | 3  | 3.66  | 0.36 |
|   | 11 | -7 | -3 | 4.31  | 0.40 |
|   | 11 | -7 | -3 | 3.88  | 0.43 |
| - | 11 | 7  | 2  | 0.07  | 0.25 |
|   | 11 | 7  | -2 | -0.27 | 0.36 |
|   | 11 | -7 | -2 | 0.48  | 0.29 |
| - | 11 | -7 | 2  | 0.30  | 0.24 |
|   | 11 | -7 | -2 | 0.60  | 0.23 |
| - | 11 | 7  | 1  | 2.10  | 0.32 |
|   | 11 | 7  | -1 | 1.41  | 0.43 |
|   | 11 | -7 | -1 | 2.46  | 0.26 |
| - | 11 | -7 | 1  | 2.93  | 0.33 |
|   | 11 | -7 | -1 | 3.21  | 0.41 |
| - | 11 | 7  | 0  | 3.50  | 0.37 |
|   | 11 | 7  | 0  | 3.85  | 0.55 |
| - | 11 | -7 | 0  | 4.72  | 0.43 |
|   | 11 | -7 | 0  | 5.16  | 0.45 |
|   | 11 | -7 | 0  | 4.84  | 0.37 |
|   | 11 | 7  | 1  | -0.80 | 0.40 |
| - | 11 | 7  | -1 | -0.30 | 0.30 |
| - | 11 | -7 | -1 | 0.32  | 0.26 |
|   | 11 | -7 | 1  | 0.04  | 0.22 |
|   | 11 | -7 | 1  | 0.36  | 0.33 |
| - | 11 | 7  | -2 | 0.61  | 0.30 |
|   | 11 | 7  | 2  | 0.52  | 0.41 |
| - | 11 | -7 | -2 | 1.19  | 0.31 |
|   | 11 | -7 | 2  | 1.27  | 0.25 |
|   | 11 | -7 | 2  | 1.37  | 0.38 |
| - | 11 | 7  | -3 | -0.50 | 0.33 |
|   | 11 | 7  | 3  | -0.30 | 0.39 |
| - | 11 | -7 | -3 | 0.41  | 0.32 |
|   | 11 | -7 | 3  | 0.50  | 0.38 |
|   | 11 | 7  | 4  | -0.21 | 0.39 |
| - | 11 | 7  | -4 | -0.79 | 0.35 |
| - | 11 | -7 | -4 | 0.48  | 0.33 |
|   | 11 | -7 | 4  | -0.07 | 0.41 |
| - | 11 | 7  | -5 | -0.64 | 0.37 |
|   | 11 | 7  | 5  | 0.08  | 0.40 |
|   | 11 | -7 | 5  | 0.67  | 0.43 |
| - | 11 | -7 | -5 | 0.35  | 0.35 |
| - | 11 | 7  | -6 | -0.67 | 0.41 |
|   | 11 | 7  | 6  | 0.10  | 0.40 |
|   | 11 | -7 | 6  | 0.26  | 0.45 |
| - | 11 | -7 | -6 | 0.35  | 0.36 |
| - | 11 | 7  | -7 | -0.59 | 0.41 |
|   | 11 | 7  | 7  | 0.01  | 0.43 |
|   | 11 | -7 | 7  | 0.73  | 0.48 |
| - | 11 | -7 | -7 | 0.33  | 0.38 |

|    |    |     |       |            |
|----|----|-----|-------|------------|
| 11 | 8  | -12 | 1.42  | 0.48       |
| 11 | -8 | -12 | 1.46  | 0.45       |
| 11 | 8  | -11 | 0.12  | 0.44       |
| 11 | -8 | -11 | -0.34 | 0.35       |
| 11 | 8  | -10 | 0.36  | 0.44       |
| 11 | -8 | -10 | -0.23 | 0.36       |
| 11 | 8  | -9  | 0.02  | 0.42       |
| 11 | -8 | -9  | 0.16  | 0.32       |
| 11 | 8  | -8  | -0.23 | 0.41       |
| -  | 11 | 8   | 8     | 0.05 0.27  |
| 11 | -8 | -8  | -0.15 | 0.32       |
| 11 | 8  | -7  | 4.50  | 0.60       |
| -  | 11 | 8   | 7     | 4.46 0.42  |
| 11 | -8 | -7  | 3.98  | 0.37       |
| -  | 11 | 8   | 6     | 0.79 0.27  |
| 11 | 8  | -6  | 0.43  | 0.38       |
| 11 | -8 | -6  | 0.54  | 0.29       |
| -  | 11 | 8   | 5     | 2.21 0.30  |
| 11 | 8  | -5  | 2.13  | 0.44       |
| 11 | -8 | -5  | 1.96  | 0.30       |
| -  | 11 | 8   | 4     | -0.18 0.26 |
| 11 | 8  | -4  | -0.74 | 0.40       |
| -  | 11 | -8  | 4     | 0.12 0.21  |
| 11 | -8 | -4  | -0.28 | 0.25       |
| -  | 11 | 8   | 3     | 0.87 0.26  |
| 11 | 8  | -3  | 0.04  | 0.43       |
| -  | 11 | -8  | 3     | 1.02 0.24  |
| 11 | -8 | -3  | 0.96  | 0.25       |
| -  | 11 | 8   | 2     | 4.20 0.45  |
| 11 | 8  | -2  | 4.00  | 0.49       |
| -  | 11 | -8  | 2     | 4.77 0.41  |
| 11 | -8 | -2  | 4.69  | 0.40       |
| 11 | -8 | -2  | 5.37  | 0.46       |
| 11 | 8  | -1  | 5.48  | 0.69       |
| -  | 11 | 8   | 1     | 7.39 0.49  |
| 11 | -8 | -1  | 8.02  | 0.45       |
| -  | 11 | -8  | 1     | 8.16 0.49  |
| 11 | -8 | -1  | 7.84  | 0.52       |
| 11 | 8  | 0   | -0.92 | 0.40       |
| -  | 11 | 8   | 0     | -0.33 0.27 |
| -  | 11 | -8  | 0     | 0.01 0.27  |
| 11 | -8 | 0   | 0.27  | 0.30       |
| 11 | -8 | 0   | 0.25  | 0.23       |
| -  | 11 | 8   | -1    | -0.06 0.29 |
| 11 | 8  | 1   | -0.88 | 0.41       |
| 11 | -8 | 1   | 0.46  | 0.24       |
| -  | 11 | -8  | -1    | 0.59 0.26  |
| 11 | -8 | 1   | 0.47  | 0.33       |
| 11 | 8  | 2   | -0.82 | 0.36       |
| -  | 11 | 8   | -2    | -0.68 0.32 |
| 11 | -8 | 2   | 0.27  | 0.36       |
| -  | 11 | -8  | -2    | 0.06 0.30  |
| 11 | -8 | 2   | -0.08 | 0.24       |
| -  | 11 | 8   | -3    | 4.41 0.50  |

|    |    |     |       |       |      |
|----|----|-----|-------|-------|------|
| 11 | 8  | 3   | 5.01  | 0.62  |      |
| 11 | -8 | 3   | 5.11  | 0.42  |      |
| 11 | -8 | 3   | 5.39  | 0.51  |      |
| -  | 11 | -8  | -3    | 6.87  | 0.50 |
| 11 | 8  | 4   | -0.65 | 0.40  |      |
| -  | 11 | 8   | -4    | -0.69 | 0.35 |
| 11 | -8 | 4   | 0.38  | 0.41  |      |
| -  | 11 | -8  | -4    | 0.15  | 0.33 |
| 11 | 8  | 5   | -0.33 | 0.40  |      |
| -  | 11 | 8   | -5    | -0.71 | 0.37 |
| -  | 11 | -8  | -5    | 0.17  | 0.32 |
| 11 | -8 | 5   | 0.35  | 0.43  |      |
| 11 | 8  | 6   | -0.27 | 0.41  |      |
| -  | 11 | 8   | -6    | -0.77 | 0.39 |
| -  | 11 | -8  | -6    | 0.59  | 0.35 |
| 11 | -8 | 6   | 0.87  | 0.46  |      |
| 11 | 8  | 7   | -0.48 | 0.42  |      |
| 11 | 9  | -12 | 1.16  | 0.49  |      |
| 11 | 9  | -11 | 0.90  | 0.48  |      |
| 11 | -9 | -11 | 1.09  | 0.41  |      |
| 11 | 9  | -10 | 2.57  | 0.50  |      |
| 11 | -9 | -10 | 2.88  | 0.40  |      |
| 11 | 9  | -9  | 0.71  | 0.46  |      |
| 11 | -9 | -9  | 1.00  | 0.36  |      |
| 11 | 9  | -8  | 0.43  | 0.43  |      |
| -  | 11 | 9   | 8     | 0.35  | 0.27 |
| 11 | -9 | -8  | 0.41  | 0.33  |      |
| -  | 11 | 9   | 7     | 0.35  | 0.27 |
| 11 | 9  | -7  | 0.06  | 0.44  |      |
| 11 | -9 | -7  | 0.13  | 0.32  |      |
| 11 | 9  | -6  | 0.12  | 0.43  |      |
| -  | 11 | 9   | 6     | 0.21  | 0.27 |
| 11 | -9 | -6  | 0.16  | 0.29  |      |
| -  | 11 | 9   | 5     | 0.11  | 0.27 |
| 11 | 9  | -5  | -0.15 | 0.42  |      |
| 11 | -9 | -5  | -0.13 | 0.28  |      |
| -  | 11 | 9   | 4     | 0.71  | 0.28 |
| 11 | 9  | -4  | 0.67  | 0.40  |      |
| 11 | -9 | -4  | 0.80  | 0.27  |      |
| -  | 11 | -9  | 4     | 1.20  | 0.24 |
| 11 | 9  | -3  | 1.89  | 0.47  |      |
| -  | 11 | 9   | 3     | 2.38  | 0.32 |
| -  | 11 | -9  | 3     | 2.39  | 0.28 |
| 11 | -9 | -3  | 2.61  | 0.29  |      |
| 11 | 9  | -2  | -0.33 | 0.41  |      |
| -  | 11 | 9   | 2     | 0.56  | 0.27 |
| -  | 11 | -9  | 2     | 0.76  | 0.26 |
| 11 | -9 | -2  | 0.74  | 0.25  |      |
| 11 | 9  | -1  | 2.76  | 0.51  |      |
| -  | 11 | 9   | 1     | 4.02  | 0.46 |
| -  | 11 | -9  | 1     | 4.53  | 0.42 |
| 11 | -9 | -1  | 3.84  | 0.39  |      |
| 11 | -9 | -1  | 4.01  | 0.41  |      |
| 11 | 9  | 0   | 0.49  | 0.45  |      |

|   |    |     |     |       |      |
|---|----|-----|-----|-------|------|
| - | 11 | 9   | 0   | 1.48  | 0.33 |
|   | 11 | -9  | 0   | 1.85  | 0.34 |
| - | 11 | -9  | 0   | 2.01  | 0.30 |
|   | 11 | -9  | 0   | 1.95  | 0.26 |
|   | 11 | 9   | 1   | -1.00 | 0.41 |
| - | 11 | 9   | -1  | -0.27 | 0.32 |
|   | 11 | -9  | 1   | 0.68  | 0.36 |
| - | 11 | -9  | -1  | 0.47  | 0.27 |
|   | 11 | -9  | 1   | 0.17  | 0.25 |
| - | 11 | 9   | -2  | 1.05  | 0.35 |
|   | 11 | 9   | 2   | 0.56  | 0.44 |
|   | 11 | -9  | 2   | 1.84  | 0.39 |
| - | 11 | -9  | -2  | 1.90  | 0.32 |
|   | 11 | -9  | 2   | 1.68  | 0.27 |
|   | 11 | 9   | 3   | 0.10  | 0.43 |
| - | 11 | 9   | -3  | -0.28 | 0.35 |
| - | 11 | -9  | -3  | 0.72  | 0.30 |
|   | 11 | -9  | 3   | 1.08  | 0.39 |
|   | 11 | -9  | 3   | 0.21  | 0.27 |
| - | 11 | 9   | -4  | -1.09 | 0.35 |
|   | 11 | 9   | 4   | -0.48 | 0.41 |
| - | 11 | -9  | -4  | 0.21  | 0.30 |
|   | 11 | -9  | 4   | 0.71  | 0.41 |
| - | 11 | 9   | -5  | -0.74 | 0.38 |
|   | 11 | 9   | 5   | -0.40 | 0.40 |
|   | 11 | -9  | 5   | 0.47  | 0.44 |
| - | 11 | -9  | -5  | 0.33  | 0.36 |
|   | 11 | 9   | 6   | -0.14 | 0.42 |
| - | 11 | 9   | -6  | -0.75 | 0.40 |
|   | 11 | -9  | 6   | 0.61  | 0.46 |
| - | 11 | -9  | -6  | 1.08  | 0.39 |
|   | 11 | 10  | -11 | 0.54  | 0.50 |
|   | 11 | -10 | -11 | 0.60  | 0.41 |
|   | 11 | 10  | -10 | -0.18 | 0.47 |
|   | 11 | -10 | -10 | 0.29  | 0.38 |
|   | 11 | 10  | -9  | 1.55  | 0.46 |
|   | 11 | -10 | -9  | 1.49  | 0.37 |
|   | 11 | 10  | -8  | -0.26 | 0.44 |
| - | 11 | 10  | 8   | -0.15 | 0.28 |
|   | 11 | -10 | -8  | -0.12 | 0.33 |
|   | 11 | 10  | -7  | 0.31  | 0.47 |
| - | 11 | 10  | 7   | 0.56  | 0.28 |
|   | 11 | -10 | -7  | 0.65  | 0.30 |
| - | 11 | 10  | 6   | 0.85  | 0.29 |
|   | 11 | 10  | -6  | 0.55  | 0.41 |
|   | 11 | -10 | -6  | 1.08  | 0.31 |
|   | 11 | 10  | -5  | 0.02  | 0.45 |
| - | 11 | 10  | 5   | 0.66  | 0.29 |
|   | 11 | -10 | -5  | 0.53  | 0.30 |
|   | 11 | 10  | -4  | -0.26 | 0.45 |
| - | 11 | 10  | 4   | 0.34  | 0.27 |
| - | 11 | -10 | 4   | 0.60  | 0.25 |
|   | 11 | -10 | -4  | 0.40  | 0.28 |
|   | 11 | 10  | -3  | -0.17 | 0.46 |

|   |    |     |     |       |      |
|---|----|-----|-----|-------|------|
| - | 11 | 10  | 3   | 0.33  | 0.27 |
|   | 11 | -10 | -3  | 0.61  | 0.26 |
| - | 11 | -10 | 3   | 0.43  | 0.25 |
|   | 11 | 10  | -2  | -0.19 | 0.41 |
| - | 11 | 10  | 2   | 0.28  | 0.28 |
| - | 11 | -10 | 2   | 0.09  | 0.26 |
|   | 11 | -10 | -2  | 0.12  | 0.26 |
| - | 11 | 10  | 1   | 4.52  | 0.48 |
|   | 11 | 10  | -1  | 3.51  | 0.53 |
| - | 11 | -10 | 1   | 5.05  | 0.43 |
|   | 11 | -10 | -1  | 4.47  | 0.37 |
| - | 11 | 10  | 0   | 0.84  | 0.30 |
|   | 11 | -10 | 0   | 1.32  | 0.31 |
|   | 11 | -10 | 0   | 1.31  | 0.27 |
| - | 11 | -10 | 0   | 1.17  | 0.30 |
| - | 11 | 10  | -1  | -0.14 | 0.29 |
|   | 11 | -10 | 1   | -0.30 | 0.26 |
| - | 11 | -10 | -1  | 0.54  | 0.30 |
|   | 11 | -10 | 1   | 0.07  | 0.34 |
| - | 11 | 10  | -2  | 0.33  | 0.34 |
|   | 11 | 10  | 2   | 0.18  | 0.44 |
| - | 11 | -10 | -2  | 1.45  | 0.32 |
|   | 11 | -10 | 2   | 1.69  | 0.38 |
|   | 11 | -10 | 2   | 1.51  | 0.28 |
| - | 11 | 10  | -3  | 0.15  | 0.36 |
|   | 11 | 10  | 3   | 0.40  | 0.44 |
| - | 11 | -10 | -3  | 1.56  | 0.34 |
|   | 11 | -10 | 3   | 1.47  | 0.41 |
|   | 11 | -10 | 3   | 1.06  | 0.30 |
| - | 11 | 10  | -4  | -0.62 | 0.37 |
|   | 11 | 10  | 4   | -0.11 | 0.44 |
|   | 11 | -10 | 4   | 1.04  | 0.43 |
| - | 11 | -10 | -4  | 0.87  | 0.34 |
| - | 11 | 10  | -5  | -0.21 | 0.39 |
|   | 11 | 10  | 5   | 0.29  | 0.43 |
| - | 11 | -10 | -5  | 1.04  | 0.37 |
|   | 11 | -10 | 5   | 1.36  | 0.45 |
| - | 11 | 10  | -6  | -0.92 | 0.42 |
|   | 11 | -10 | 6   | 0.56  | 0.47 |
|   | 11 | 11  | -10 | 0.35  | 0.45 |
|   | 11 | -11 | -10 | 0.97  | 0.39 |
|   | 11 | 11  | -9  | 0.19  | 0.50 |
|   | 11 | -11 | -9  | -0.19 | 0.35 |
|   | 11 | 11  | -8  | 0.55  | 0.49 |
|   | 11 | -11 | -8  | 0.96  | 0.32 |
| - | 11 | 11  | 7   | -0.35 | 0.29 |
|   | 11 | 11  | -7  | 0.04  | 0.42 |
|   | 11 | -11 | -7  | 0.05  | 0.33 |
|   | 11 | 11  | -6  | 0.41  | 0.47 |
| - | 11 | 11  | 6   | 0.85  | 0.29 |
|   | 11 | -11 | -6  | 0.93  | 0.31 |
| - | 11 | 11  | 5   | 0.04  | 0.29 |
|   | 11 | 11  | -5  | -0.19 | 0.46 |
|   | 11 | -11 | -5  | 0.13  | 0.30 |

|    |    |     |      |       |
|----|----|-----|------|-------|
| 11 | 11 | -4  | 1.21 | 0.49  |
| -  | 11 | 11  | 4    | 1.77  |
|    | 11 | -11 | -4   | 1.66  |
|    | 11 | 11  | -3   | -0.50 |
| -  | 11 | 11  | 3    | 0.03  |
|    | 11 | -11 | -3   | 0.09  |
| -  | 11 | -11 | 3    | 0.17  |
| -  | 11 | 11  | 2    | 1.82  |
|    | 11 | 11  | -2   | 1.80  |
| -  | 11 | -11 | 2    | 2.24  |
|    | 11 | -11 | -2   | 2.35  |
|    | 11 | 11  | -1   | -1.18 |
| -  | 11 | 11  | 1    | 0.19  |
| -  | 11 | -11 | 1    | 0.43  |
|    | 11 | -11 | -1   | 0.29  |
| -  | 11 | 11  | 0    | 1.62  |
|    | 11 | -11 | 0    | 1.41  |
| -  | 11 | -11 | 0    | 1.44  |
| -  | 11 | 11  | -1   | -0.19 |
|    | 11 | -11 | 1    | 0.74  |
|    | 11 | -11 | 1    | -0.02 |
| -  | 11 | -11 | -1   | 0.01  |
| -  | 11 | 11  | -2   | -0.65 |
|    | 11 | -11 | 2    | 0.29  |
|    | 11 | -11 | 2    | 0.56  |
| -  | 11 | -11 | -2   | 0.38  |
| -  | 11 | 11  | -3   | -0.74 |
|    | 11 | -11 | 3    | 0.11  |
|    | 11 | -11 | 3    | 0.68  |
| -  | 11 | -11 | -3   | 0.30  |
| -  | 11 | 11  | -4   | -0.61 |
|    | 11 | 11  | 4    | -0.64 |
|    | 11 | -11 | 4    | 0.70  |
| -  | 11 | -11 | -4   | 0.28  |
|    | 11 | 11  | 5    | -0.82 |
| -  | 11 | -11 | -5   | 0.25  |
|    | 11 | -11 | 5    | 0.62  |
|    | 11 | 12  | -10  | -0.20 |
|    | 11 | -12 | -10  | -0.19 |
|    | 11 | 12  | -9   | -0.08 |
|    | 11 | -12 | -9   | 0.15  |
|    | 11 | 12  | -8   | 0.52  |
|    | 11 | -12 | -8   | 0.26  |
| -  | 11 | 12  | 7    | 1.35  |
|    | 11 | 12  | -7   | 1.48  |
|    | 11 | -12 | -7   | 1.94  |
|    | 11 | 12  | -6   | 2.51  |
| -  | 11 | 12  | 6    | 1.61  |
|    | 11 | -12 | -6   | 2.29  |
|    | 11 | 12  | -5   | 0.24  |
| -  | 11 | 12  | 5    | -0.05 |
|    | 11 | -12 | -5   | 0.21  |
|    | 11 | 12  | -4   | -0.39 |
| -  | 11 | 12  | 4    | 0.13  |

|    |     |     |       |       |
|----|-----|-----|-------|-------|
| 11 | -12 | -4  | 0.32  | 0.27  |
| -  | 11  | 12  | 3     | 0.39  |
| 11 | 12  | -3  | -0.31 | 0.43  |
| -  | 11  | -12 | 3     | 0.47  |
| 11 | -12 | -3  | 0.56  | 0.29  |
| 11 | 12  | -2  | -0.43 | 0.43  |
| -  | 11  | 12  | 2     | 0.21  |
| -  | 11  | -12 | 2     | 0.38  |
| 11 | -12 | -2  | 0.67  | 0.26  |
| -  | 11  | 12  | 1     | 0.14  |
| 11 | 12  | -1  | -0.91 | 0.47  |
| 11 | -12 | -1  | 0.20  | 0.28  |
| -  | 11  | -12 | 1     | 0.10  |
| -  | 11  | 12  | 0     | 0.10  |
| -  | 11  | -12 | 0     | 0.62  |
| 11 | -12 | 0   | 0.05  | 0.28  |
| -  | 11  | 12  | -1    | -0.26 |
| 11 | -12 | 1   | -0.09 | 0.26  |
| -  | 11  | -12 | -1    | 0.01  |
| -  | 11  | 12  | -2    | -0.37 |
| -  | 11  | -12 | -2    | 0.42  |
| 11 | -12 | 2   | -0.01 | 0.29  |
| 11 | -12 | 2   | 0.52  | 0.38  |
| -  | 11  | 12  | -3    | -0.77 |
| 11 | -12 | 3   | 0.34  | 0.28  |
| -  | 11  | -12 | -3    | 0.04  |
| 11 | -12 | 3   | 0.50  | 0.40  |
| 11 | 12  | 4   | -0.87 | 0.42  |
| -  | 11  | 12  | -4    | -0.52 |
| 11 | -12 | 4   | 0.58  | 0.43  |
| -  | 11  | -12 | -4    | 0.19  |
| 11 | -12 | 4   | 0.07  | 0.33  |
| -  | 11  | 12  | -5    | -0.86 |
| 11 | -12 | 5   | 0.75  | 0.45  |
| 11 | 13  | -9  | 1.14  | 0.54  |
| 11 | -13 | -9  | 1.94  | 0.37  |
| 11 | 13  | -8  | 0.09  | 0.53  |
| 11 | -13 | -8  | 0.03  | 0.33  |
| 11 | 13  | -7  | 1.97  | 0.54  |
| 11 | -13 | -7  | 2.06  | 0.34  |
| -  | 11  | 13  | 6     | 0.11  |
| 11 | 13  | -6  | 0.42  | 0.51  |
| 11 | -13 | -6  | 0.20  | 0.30  |
| 11 | 13  | -5  | -0.16 | 0.45  |
| -  | 11  | 13  | 5     | -0.23 |
| 11 | -13 | -5  | 0.05  | 0.29  |
| 11 | 13  | -4  | -0.26 | 0.49  |
| -  | 11  | 13  | 4     | 0.31  |
| 11 | -13 | -4  | 0.05  | 0.28  |
| 11 | 13  | -3  | -0.09 | 0.50  |
| -  | 11  | 13  | 3     | 0.51  |
| 11 | -13 | -3  | 0.85  | 0.30  |
| -  | 11  | -13 | 3     | 1.13  |
| 11 | 13  | -2  | -0.81 | 0.47  |

|   |    |     |    |       |      |
|---|----|-----|----|-------|------|
| - | 11 | 13  | 2  | 0.03  | 0.33 |
|   | 11 | -13 | -2 | 0.21  | 0.29 |
| - | 11 | -13 | 2  | 0.25  | 0.28 |
|   | 11 | 13  | -1 | -0.22 | 0.49 |
| - | 11 | 13  | 1  | 1.07  | 0.35 |
|   | 11 | -13 | -1 | 0.99  | 0.31 |
| - | 11 | -13 | 1  | 0.99  | 0.30 |
| - | 11 | 13  | 0  | 1.63  | 0.38 |
|   | 11 | 13  | 0  | 0.50  | 0.44 |
| - | 11 | -13 | 0  | 1.90  | 0.32 |
|   | 11 | -13 | 0  | 1.54  | 0.31 |
| - | 11 | 13  | -1 | 0.21  | 0.34 |
|   | 11 | -13 | 1  | 0.28  | 0.31 |
| - | 11 | -13 | -1 | 0.70  | 0.32 |
| - | 11 | 13  | -2 | 0.89  | 0.35 |
|   | 11 | -13 | 2  | 0.81  | 0.30 |
| - | 11 | -13 | -2 | 1.22  | 0.34 |
| - | 11 | 13  | -3 | 0.36  | 0.39 |
|   | 11 | 13  | 3  | -0.74 | 0.46 |
|   | 11 | -13 | 3  | 0.65  | 0.33 |
|   | 11 | -13 | 3  | 1.91  | 0.44 |
| - | 11 | -13 | -3 | 1.09  | 0.33 |
| - | 11 | 13  | -4 | -0.51 | 0.38 |
|   | 11 | -13 | 4  | 1.05  | 0.43 |
|   | 11 | -13 | 4  | -0.18 | 0.34 |
| - | 11 | 13  | -5 | -0.45 | 0.42 |
|   | 11 | 14  | -8 | 0.28  | 0.56 |
|   | 11 | -14 | -8 | 0.12  | 0.38 |
|   | 11 | 14  | -7 | 0.58  | 0.55 |
|   | 11 | -14 | -7 | 0.71  | 0.36 |
|   | 11 | 14  | -6 | 0.04  | 0.51 |
| - | 11 | 14  | 6  | -0.18 | 0.30 |
|   | 11 | -14 | -6 | -0.27 | 0.31 |
|   | 11 | 14  | -5 | -0.45 | 0.52 |
| - | 11 | 14  | 5  | -0.08 | 0.30 |
|   | 11 | -14 | -5 | 0.02  | 0.31 |
|   | 11 | 14  | -4 | 0.04  | 0.51 |
| - | 11 | 14  | 4  | 0.39  | 0.34 |
|   | 11 | -14 | -4 | 0.39  | 0.32 |
| - | 11 | 14  | 3  | 0.18  | 0.35 |
|   | 11 | 14  | -3 | -0.81 | 0.50 |
|   | 11 | -14 | -3 | 0.00  | 0.28 |
| - | 11 | 14  | 2  | 0.49  | 0.35 |
|   | 11 | 14  | -2 | -0.64 | 0.50 |
| - | 11 | -14 | 2  | 0.50  | 0.29 |
|   | 11 | -14 | -2 | 0.43  | 0.31 |
| - | 11 | 14  | 1  | 0.14  | 0.36 |
|   | 11 | 14  | -1 | -0.64 | 0.48 |
|   | 11 | -14 | -1 | 0.26  | 0.31 |
| - | 11 | -14 | 1  | 0.40  | 0.30 |
| - | 11 | 14  | 0  | 0.06  | 0.36 |
| - | 11 | -14 | 0  | 0.14  | 0.31 |
|   | 11 | -14 | 0  | 0.09  | 0.31 |
| - | 11 | 14  | -1 | -0.51 | 0.33 |

|   |    |     |    |       |      |
|---|----|-----|----|-------|------|
| - | 11 | -14 | -1 | 0.26  | 0.33 |
|   | 11 | -14 | 1  | 0.37  | 0.32 |
| - | 11 | 14  | -2 | -0.36 | 0.37 |
|   | 11 | -14 | 2  | 0.15  | 0.30 |
| - | 11 | -14 | -2 | 0.39  | 0.35 |
| - | 11 | 14  | -3 | -0.50 | 0.38 |
| - | 11 | -14 | -3 | 0.07  | 0.33 |
|   | 11 | -14 | 3  | -0.08 | 0.33 |
| - | 11 | 14  | -4 | -1.14 | 0.40 |
|   | 11 | -14 | 4  | 0.75  | 0.44 |
|   | 11 | 15  | -7 | -0.14 | 0.51 |
|   | 11 | -15 | -7 | 0.51  | 0.38 |
|   | 11 | 15  | -6 | -0.15 | 0.53 |
|   | 11 | -15 | -6 | 0.25  | 0.33 |
|   | 11 | 15  | -5 | 0.21  | 0.55 |
| - | 11 | 15  | 5  | 0.25  | 0.34 |
|   | 11 | -15 | -5 | 0.77  | 0.36 |
| - | 11 | 15  | 4  | 0.31  | 0.35 |
|   | 11 | 15  | -4 | -0.17 | 0.53 |
|   | 11 | -15 | -4 | 0.19  | 0.31 |
| - | 11 | 15  | 3  | 0.23  | 0.32 |
|   | 11 | 15  | -3 | 0.04  | 0.52 |
|   | 11 | -15 | -3 | 0.25  | 0.33 |
|   | 11 | 15  | -2 | 0.08  | 0.52 |
| - | 11 | 15  | 2  | 0.67  | 0.37 |
| - | 11 | -15 | 2  | 0.77  | 0.30 |
|   | 11 | -15 | -2 | 1.03  | 0.33 |
| - | 11 | 15  | 1  | 0.91  | 0.38 |
|   | 11 | 15  | -1 | -0.16 | 0.51 |
| - | 11 | -15 | 1  | 1.11  | 0.32 |
|   | 11 | -15 | -1 | 1.13  | 0.33 |
|   | 11 | 15  | 0  | -1.13 | 0.49 |
| - | 11 | 15  | 0  | -0.27 | 0.38 |
| - | 11 | -15 | 0  | 0.50  | 0.33 |
|   | 11 | -15 | 0  | 0.04  | 0.30 |
| - | 11 | 15  | -1 | 0.14  | 0.36 |
|   | 11 | 15  | 1  | -1.23 | 0.48 |
| - | 11 | -15 | -1 | 0.50  | 0.35 |
|   | 11 | -15 | 1  | 0.48  | 0.33 |
| - | 11 | 15  | -2 | 0.11  | 0.40 |
|   | 11 | -15 | 2  | 0.54  | 0.34 |
| - | 11 | -15 | -2 | 1.16  | 0.37 |
|   | 11 | 16  | -5 | -0.21 | 0.54 |
|   | 11 | -16 | -5 | 0.30  | 0.34 |
|   | 11 | 16  | -4 | -0.11 | 0.55 |
| - | 11 | 16  | 4  | 0.15  | 0.37 |
|   | 11 | -16 | -4 | 0.65  | 0.32 |
| - | 11 | 16  | 3  | 0.42  | 0.34 |
|   | 11 | 16  | -3 | -0.88 | 0.53 |
|   | 11 | -16 | -3 | 0.25  | 0.31 |
|   | 11 | 16  | -2 | -0.94 | 0.51 |
| - | 11 | 16  | 2  | -0.15 | 0.37 |
|   | 11 | -16 | -2 | 0.51  | 0.34 |
| - | 11 | -16 | 2  | 0.57  | 0.31 |

|   |    |     |     |       |      |
|---|----|-----|-----|-------|------|
| - | 11 | 16  | 1   | 0.14  | 0.38 |
|   | 11 | 16  | -1  | -0.77 | 0.51 |
| - | 11 | -16 | 1   | 0.45  | 0.33 |
|   | 11 | -16 | -1  | 0.31  | 0.34 |
|   | 11 | 16  | 0   | -0.25 | 0.51 |
| - | 11 | 16  | 0   | 0.89  | 0.37 |
|   | 11 | -16 | 0   | 0.90  | 0.35 |
| - | 11 | -16 | 0   | 1.19  | 0.35 |
| - | 11 | 16  | -1  | -0.42 | 0.40 |
| - | 11 | -16 | -1  | 0.43  | 0.32 |
|   | 11 | 17  | -4  | 0.31  | 0.56 |
|   | 11 | 17  | -3  | -0.48 | 0.55 |
|   | 11 | 17  | -2  | -0.71 | 0.52 |
|   | 11 | 17  | -1  | -0.94 | 0.55 |
| - | 11 | -17 | 1   | 1.21  | 0.35 |
| - | 11 | -17 | 0   | 0.86  | 0.36 |
|   | 12 | 0   | -12 | 0.15  | 0.39 |
|   | 12 | 0   | -9  | -0.21 | 0.32 |
|   | 12 | 0   | -8  | 0.13  | 0.33 |
|   | 12 | 0   | -7  | -0.08 | 0.32 |
|   | 12 | 0   | -6  | -0.38 | 0.32 |
| - | 12 | 0   | 6   | -0.16 | 0.24 |
| - | 12 | 0   | 5   | -0.21 | 0.23 |
|   | 12 | 0   | -5  | -0.61 | 0.32 |
| - | 12 | 0   | 4   | 4.97  | 0.41 |
|   | 12 | 0   | -4  | 3.82  | 0.51 |
|   | 12 | 0   | -3  | -0.64 | 0.35 |
| - | 12 | 0   | 3   | 0.11  | 0.24 |
| - | 12 | 0   | 2   | 12.61 | 0.63 |
|   | 12 | 0   | -2  | 12.65 | 0.76 |
|   | 12 | 0   | -1  | 0.11  | 0.36 |
| - | 12 | 0   | 1   | -0.16 | 0.25 |
|   | 12 | 0   | 0   | 0.48  | 0.33 |
| - | 12 | 0   | 0   | 0.39  | 0.29 |
| - | 12 | 0   | -1  | 0.03  | 0.29 |
|   | 12 | 0   | 1   | -0.10 | 0.37 |
| - | 12 | 0   | -2  | 4.58  | 0.50 |
|   | 12 | 0   | 2   | 4.61  | 0.49 |
|   | 12 | 0   | 3   | 0.12  | 0.39 |
| - | 12 | 0   | -3  | -0.05 | 0.33 |
|   | 12 | 0   | 4   | 0.32  | 0.40 |
| - | 12 | 0   | -4  | -0.31 | 0.35 |
|   | 12 | 0   | 5   | 0.41  | 0.37 |
| - | 12 | 0   | -5  | -0.17 | 0.37 |
|   | 12 | 0   | 6   | 1.01  | 0.43 |
| - | 12 | 0   | -6  | 0.79  | 0.40 |
| - | 12 | 0   | -7  | -0.02 | 0.42 |
|   | 12 | -1  | -12 | -0.83 | 0.39 |
|   | 12 | -1  | -11 | 0.52  | 0.37 |
|   | 12 | -1  | -10 | 0.45  | 0.37 |
|   | 12 | 1   | -9  | 1.81  | 0.39 |
|   | 12 | -1  | -9  | 1.24  | 0.34 |
|   | 12 | 1   | -8  | 0.68  | 0.35 |
|   | 12 | -1  | -8  | 0.67  | 0.32 |

|    |    |    |       |       |
|----|----|----|-------|-------|
| 12 | -1 | -8 | 0.18  | 0.30  |
| 12 | 1  | -7 | 0.37  | 0.34  |
| -  | 12 | 1  | 7     | 0.17  |
| 12 | -1 | -7 | 0.36  | 0.33  |
| 12 | -1 | -7 | -0.45 | 0.27  |
| -  | 12 | 1  | 6     | -0.20 |
| 12 | 1  | -6 | 0.16  | 0.34  |
| -  | 12 | -1 | 6     | -0.11 |
| 12 | -1 | -6 | 0.12  | 0.33  |
| 12 | 1  | -5 | 0.77  | 0.36  |
| -  | 12 | 1  | 5     | 0.92  |
| -  | 12 | -1 | 5     | 1.05  |
| 12 | -1 | -5 | 0.69  | 0.32  |
| -  | 12 | 1  | 4     | 0.13  |
| 12 | 1  | -4 | -0.57 | 0.34  |
| -  | 12 | -1 | 4     | -0.10 |
| 12 | -1 | -4 | -0.15 | 0.32  |
| -  | 12 | 1  | 3     | 0.07  |
| 12 | 1  | -3 | -0.33 | 0.36  |
| 12 | -1 | -3 | 0.08  | 0.34  |
| -  | 12 | -1 | 3     | 0.15  |
| 12 | 1  | -2 | 1.41  | 0.36  |
| -  | 12 | 1  | 2     | 1.61  |
| -  | 12 | -1 | 2     | 1.35  |
| 12 | -1 | -2 | 1.88  | 0.38  |
| 12 | 1  | -1 | -0.15 | 0.37  |
| -  | 12 | 1  | 1     | -0.06 |
| -  | 12 | -1 | 1     | -0.20 |
| 12 | -1 | -1 | -0.05 | 0.32  |
| 12 | 1  | 0  | 0.75  | 0.34  |
| -  | 12 | 1  | 0     | 0.44  |
| -  | 12 | -1 | 0     | 0.52  |
| 12 | -1 | 0  | 0.52  | 0.37  |
| -  | 12 | 1  | -1    | -0.05 |
| 12 | 1  | 1  | 0.16  | 0.37  |
| 12 | -1 | 1  | 0.17  | 0.36  |
| -  | 12 | -1 | -1    | 0.03  |
| -  | 12 | 1  | -2    | 1.57  |
| 12 | 1  | 2  | 1.53  | 0.37  |
| -  | 12 | -1 | -2    | 1.45  |
| 12 | -1 | 2  | 1.77  | 0.39  |
| -  | 12 | 1  | -3    | 1.09  |
| 12 | 1  | 3  | 1.11  | 0.39  |
| -  | 12 | -1 | -3    | 1.19  |
| 12 | -1 | 3  | 1.27  | 0.40  |
| -  | 12 | 1  | -4    | 0.65  |
| 12 | 1  | 4  | 0.56  | 0.40  |
| 12 | -1 | 4  | 0.66  | 0.39  |
| -  | 12 | -1 | -4    | 0.63  |
| -  | 12 | 1  | -5    | 1.03  |
| 12 | 1  | 5  | 1.19  | 0.43  |
| -  | 12 | -1 | -5    | 1.28  |
| 12 | -1 | 5  | 1.07  | 0.42  |
| 12 | 1  | 6  | 0.37  | 0.43  |

|   |    |    |     |       |      |
|---|----|----|-----|-------|------|
| - | 12 | 1  | -6  | 0.13  | 0.40 |
| - | 12 | -1 | -6  | 0.07  | 0.39 |
|   | 12 | -1 | 6   | 0.45  | 0.43 |
| - | 12 | 1  | -7  | 0.12  | 0.43 |
| - | 12 | -1 | -7  | 0.28  | 0.41 |
|   | 12 | -2 | -13 | -0.79 | 0.45 |
|   | 12 | -2 | -12 | 1.57  | 0.44 |
|   | 12 | -2 | -11 | 1.26  | 0.40 |
|   | 12 | 2  | -10 | -0.05 | 0.38 |
|   | 12 | -2 | -10 | -0.53 | 0.35 |
|   | 12 | 2  | -9  | -0.13 | 0.38 |
|   | 12 | -2 | -9  | -0.23 | 0.33 |
|   | 12 | 2  | -8  | 3.00  | 0.40 |
|   | 12 | -2 | -8  | 2.81  | 0.36 |
|   | 12 | 2  | -7  | -0.08 | 0.35 |
| - | 12 | 2  | 7   | -0.10 | 0.23 |
|   | 12 | -2 | -7  | -0.54 | 0.29 |
|   | 12 | -2 | -7  | -0.17 | 0.30 |
|   | 12 | 2  | -6  | -0.13 | 0.35 |
| - | 12 | 2  | 6   | -0.26 | 0.23 |
|   | 12 | -2 | -6  | -0.29 | 0.26 |
|   | 12 | -2 | -6  | 0.00  | 0.32 |
| - | 12 | -2 | 6   | -0.16 | 0.25 |
| - | 12 | 2  | 5   | -0.40 | 0.24 |
|   | 12 | 2  | -5  | -0.55 | 0.36 |
|   | 12 | -2 | -5  | -0.35 | 0.24 |
|   | 12 | -2 | -5  | -0.40 | 0.29 |
| - | 12 | -2 | 5   | -0.03 | 0.24 |
| - | 12 | 2  | 4   | -0.02 | 0.25 |
| - | 12 | -2 | 4   | 0.13  | 0.25 |
|   | 12 | -2 | -4  | 0.79  | 0.32 |
| - | 12 | 2  | 3   | 0.41  | 0.28 |
|   | 12 | 2  | -3  | 0.07  | 0.37 |
| - | 12 | -2 | 3   | 0.79  | 0.26 |
|   | 12 | -2 | -3  | 0.26  | 0.33 |
|   | 12 | 2  | -2  | 1.66  | 0.41 |
| - | 12 | 2  | 2   | 1.57  | 0.29 |
|   | 12 | -2 | -2  | 2.23  | 0.37 |
| - | 12 | -2 | 2   | 1.86  | 0.29 |
|   | 12 | 2  | -1  | -0.49 | 0.38 |
| - | 12 | 2  | 1   | -0.04 | 0.29 |
| - | 12 | -2 | 1   | 0.01  | 0.27 |
|   | 12 | -2 | -1  | 0.19  | 0.34 |
|   | 12 | 2  | 0   | 0.94  | 0.39 |
| - | 12 | 2  | 0   | 0.69  | 0.28 |
|   | 12 | -2 | 0   | 1.23  | 0.37 |
| - | 12 | -2 | 0   | 1.06  | 0.27 |
| - | 12 | 2  | -1  | 0.45  | 0.32 |
|   | 12 | 2  | 1   | 0.85  | 0.38 |
| - | 12 | -2 | -1  | 1.13  | 0.30 |
|   | 12 | -2 | 1   | 1.27  | 0.36 |
|   | 12 | 2  | 2   | 4.89  | 0.58 |
| - | 12 | 2  | -2  | 4.58  | 0.52 |
|   | 12 | -2 | 2   | 4.86  | 0.55 |

|   |    |    |     |       |      |
|---|----|----|-----|-------|------|
| - | 12 | -2 | -2  | 5.02  | 0.47 |
| - | 12 | 2  | -3  | -0.07 | 0.35 |
|   | 12 | 2  | 3   | 0.23  | 0.39 |
|   | 12 | -2 | 3   | 0.02  | 0.37 |
| - | 12 | -2 | -3  | -0.07 | 0.31 |
|   | 12 | 2  | 4   | 0.86  | 0.40 |
| - | 12 | 2  | -4  | 0.24  | 0.36 |
| - | 12 | -2 | -4  | 0.69  | 0.30 |
|   | 12 | -2 | 4   | 0.98  | 0.40 |
|   | 12 | 2  | 5   | -0.01 | 0.41 |
| - | 12 | 2  | -5  | -0.42 | 0.39 |
| - | 12 | -2 | -5  | -0.10 | 0.35 |
|   | 12 | -2 | 5   | 0.41  | 0.38 |
| - | 12 | 2  | -6  | -0.12 | 0.41 |
|   | 12 | 2  | 6   | 0.22  | 0.43 |
| - | 12 | -2 | -6  | 0.03  | 0.35 |
|   | 12 | -2 | 6   | 0.57  | 0.40 |
| - | 12 | 2  | -7  | 1.43  | 0.45 |
| - | 12 | -2 | -7  | 1.65  | 0.43 |
|   | 12 | -3 | -13 | 0.06  | 0.45 |
|   | 12 | -3 | -12 | -0.86 | 0.40 |
|   | 12 | 3  | -11 | -0.35 | 0.41 |
|   | 12 | -3 | -11 | -0.95 | 0.39 |
|   | 12 | 3  | -10 | 0.09  | 0.38 |
|   | 12 | -3 | -10 | -0.84 | 0.36 |
|   | 12 | 3  | -9  | -0.55 | 0.37 |
|   | 12 | -3 | -9  | -0.77 | 0.33 |
|   | 12 | 3  | -8  | 0.74  | 0.36 |
|   | 12 | -3 | -8  | 0.98  | 0.33 |
|   | 12 | 3  | -7  | 0.03  | 0.36 |
| - | 12 | 3  | 7   | 0.48  | 0.26 |
|   | 12 | -3 | -7  | -0.51 | 0.31 |
| - | 12 | 3  | 6   | 0.47  | 0.26 |
|   | 12 | 3  | -6  | 0.09  | 0.37 |
|   | 12 | -3 | -6  | 0.37  | 0.29 |
| - | 12 | -3 | 6   | 0.42  | 0.24 |
|   | 12 | -3 | -6  | 0.40  | 0.29 |
|   | 12 | 3  | -5  | 1.42  | 0.40 |
| - | 12 | 3  | 5   | 1.57  | 0.27 |
| - | 12 | -3 | 5   | 2.06  | 0.28 |
|   | 12 | -3 | -5  | 1.25  | 0.33 |
|   | 12 | -3 | -5  | 2.24  | 0.28 |
| - | 12 | 3  | 4   | 0.76  | 0.27 |
|   | 12 | 3  | -4  | 0.65  | 0.39 |
| - | 12 | -3 | 4   | 1.21  | 0.26 |
|   | 12 | -3 | -4  | 1.60  | 0.27 |
|   | 12 | -3 | -4  | 1.08  | 0.33 |
|   | 12 | 3  | -3  | 0.26  | 0.39 |
| - | 12 | 3  | 3   | 0.42  | 0.25 |
| - | 12 | -3 | 3   | 0.90  | 0.27 |
|   | 12 | -3 | -3  | 1.00  | 0.33 |
|   | 12 | -3 | -3  | 0.99  | 0.23 |
|   | 12 | 3  | -2  | -0.19 | 0.36 |
| - | 12 | 3  | 2   | -0.11 | 0.28 |

|   |    |    |     |       |      |
|---|----|----|-----|-------|------|
| - | 12 | -3 | 2   | 0.07  | 0.27 |
|   | 12 | -3 | -2  | -0.04 | 0.33 |
|   | 12 | 3  | -1  | 3.89  | 0.47 |
| - | 12 | 3  | 1   | 3.87  | 0.41 |
| - | 12 | -3 | 1   | 4.58  | 0.43 |
|   | 12 | -3 | -1  | 4.26  | 0.50 |
|   | 12 | 3  | 0   | 0.11  | 0.40 |
| - | 12 | 3  | 0   | -0.02 | 0.30 |
|   | 12 | -3 | 0   | 0.75  | 0.36 |
| - | 12 | -3 | 0   | 0.56  | 0.28 |
| - | 12 | 3  | -1  | 0.03  | 0.32 |
|   | 12 | 3  | 1   | -0.13 | 0.39 |
| - | 12 | -3 | -1  | -0.06 | 0.28 |
|   | 12 | -3 | 1   | 0.67  | 0.33 |
| - | 12 | 3  | -2  | -0.02 | 0.34 |
|   | 12 | 3  | 2   | 0.52  | 0.39 |
|   | 12 | -3 | 2   | 0.53  | 0.37 |
| - | 12 | -3 | -2  | 0.61  | 0.28 |
| - | 12 | 3  | -3  | -0.13 | 0.35 |
|   | 12 | 3  | 3   | 0.21  | 0.36 |
| - | 12 | -3 | -3  | 0.08  | 0.31 |
|   | 12 | -3 | 3   | 0.26  | 0.35 |
| - | 12 | 3  | -4  | 1.49  | 0.39 |
|   | 12 | 3  | 4   | 1.68  | 0.43 |
|   | 12 | -3 | 4   | 1.66  | 0.42 |
| - | 12 | -3 | -4  | 1.58  | 0.32 |
|   | 12 | 3  | 5   | 0.65  | 0.42 |
| - | 12 | 3  | -5  | 0.25  | 0.40 |
|   | 12 | -3 | 5   | 0.58  | 0.38 |
| - | 12 | -3 | -5  | 0.60  | 0.35 |
| - | 12 | 3  | -6  | -0.25 | 0.42 |
|   | 12 | 3  | 6   | 0.40  | 0.43 |
| - | 12 | -3 | -6  | 0.25  | 0.37 |
|   | 12 | -3 | 6   | 0.02  | 0.41 |
| - | 12 | 3  | -7  | -0.20 | 0.47 |
| - | 12 | -3 | -7  | 0.17  | 0.40 |
|   | 12 | -4 | -12 | -0.01 | 0.43 |
|   | 12 | 4  | -11 | 0.35  | 0.41 |
|   | 12 | -4 | -11 | -0.16 | 0.40 |
|   | 12 | 4  | -10 | -0.08 | 0.39 |
|   | 12 | -4 | -10 | -0.62 | 0.36 |
|   | 12 | 4  | -9  | -0.13 | 0.38 |
|   | 12 | -4 | -9  | -0.99 | 0.34 |
|   | 12 | 4  | -8  | 0.15  | 0.34 |
|   | 12 | -4 | -8  | 0.25  | 0.35 |
|   | 12 | 4  | -7  | 0.36  | 0.39 |
| - | 12 | 4  | 7   | 0.98  | 0.26 |
|   | 12 | -4 | -7  | 0.64  | 0.31 |
| - | 12 | 4  | 6   | 5.74  | 0.44 |
|   | 12 | 4  | -6  | 5.73  | 0.61 |
|   | 12 | -4 | -6  | 6.96  | 0.49 |
|   | 12 | 4  | -5  | 3.37  | 0.46 |
| - | 12 | 4  | 5   | 3.68  | 0.41 |
|   | 12 | -4 | -5  | 3.60  | 0.47 |

|   |    |    |     |       |      |
|---|----|----|-----|-------|------|
| - | 12 | -4 | 5   | 4.24  | 0.42 |
|   | 12 | -4 | -5  | 4.01  | 0.43 |
|   | 12 | 4  | -4  | -0.92 | 0.39 |
| - | 12 | 4  | 4   | -0.44 | 0.26 |
|   | 12 | -4 | -4  | -0.22 | 0.31 |
|   | 12 | -4 | -4  | -0.12 | 0.24 |
| - | 12 | -4 | 4   | 0.09  | 0.25 |
|   | 12 | 4  | -3  | -0.47 | 0.40 |
| - | 12 | 4  | 3   | -0.14 | 0.28 |
|   | 12 | -4 | -3  | 0.18  | 0.32 |
|   | 12 | -4 | -3  | 0.32  | 0.23 |
| - | 12 | -4 | 3   | 0.46  | 0.25 |
| - | 12 | 4  | 2   | 3.72  | 0.40 |
|   | 12 | 4  | -2  | 3.93  | 0.46 |
|   | 12 | -4 | -2  | 4.61  | 0.48 |
| - | 12 | -4 | 2   | 4.04  | 0.41 |
|   | 12 | -4 | -2  | 4.67  | 0.42 |
|   | 12 | 4  | -1  | -0.38 | 0.37 |
| - | 12 | 4  | 1   | -0.32 | 0.29 |
|   | 12 | -4 | -1  | 0.28  | 0.33 |
| - | 12 | -4 | 1   | 0.13  | 0.24 |
|   | 12 | -4 | -1  | 0.10  | 0.22 |
|   | 12 | 4  | 0   | 0.72  | 0.38 |
| - | 12 | 4  | 0   | 0.49  | 0.32 |
|   | 12 | -4 | 0   | 1.00  | 0.35 |
| - | 12 | -4 | 0   | 0.91  | 0.26 |
| - | 12 | 4  | -1  | -0.07 | 0.30 |
|   | 12 | 4  | 1   | -0.30 | 0.40 |
| - | 12 | -4 | -1  | 0.03  | 0.29 |
|   | 12 | -4 | 1   | 0.09  | 0.35 |
|   | 12 | 4  | 2   | -0.36 | 0.39 |
| - | 12 | 4  | -2  | -0.23 | 0.30 |
|   | 12 | -4 | 2   | 0.24  | 0.36 |
| - | 12 | -4 | -2  | -0.21 | 0.28 |
| - | 12 | 4  | -3  | -0.05 | 0.35 |
|   | 12 | 4  | 3   | 0.09  | 0.40 |
| - | 12 | -4 | -3  | 0.29  | 0.32 |
|   | 12 | -4 | 3   | 0.38  | 0.35 |
| - | 12 | 4  | -4  | -0.38 | 0.37 |
|   | 12 | 4  | 4   | -0.05 | 0.41 |
| - | 12 | -4 | -4  | 0.19  | 0.31 |
|   | 12 | -4 | 4   | 0.16  | 0.40 |
|   | 12 | 4  | 5   | 1.30  | 0.44 |
| - | 12 | 4  | -5  | 0.84  | 0.41 |
|   | 12 | -4 | 5   | 1.18  | 0.41 |
| - | 12 | -4 | -5  | 1.07  | 0.34 |
| - | 12 | 4  | -6  | -0.02 | 0.42 |
|   | 12 | 4  | 6   | 0.64  | 0.44 |
|   | 12 | -4 | 6   | 1.00  | 0.47 |
| - | 12 | -4 | -6  | 0.28  | 0.38 |
| - | 12 | 4  | -7  | 0.21  | 0.44 |
|   | 12 | 5  | -12 | 0.13  | 0.43 |
|   | 12 | -5 | -12 | 0.11  | 0.44 |
|   | 12 | 5  | -11 | 0.74  | 0.43 |

|    |    |     |       |       |      |
|----|----|-----|-------|-------|------|
| 12 | -5 | -11 | 0.69  | 0.42  |      |
| 12 | 5  | -10 | -0.48 | 0.40  |      |
| 12 | -5 | -10 | -0.53 | 0.33  |      |
| 12 | 5  | -9  | 1.03  | 0.42  |      |
| 12 | -5 | -9  | 0.98  | 0.36  |      |
| 12 | 5  | -8  | -0.26 | 0.39  |      |
| -  | 12 | 5   | 8     | 0.00  | 0.27 |
| 12 | -5 | -8  | -0.33 | 0.32  |      |
| -  | 12 | 5   | 7     | 0.55  | 0.26 |
| 12 | 5  | -7  | 0.06  | 0.40  |      |
| 12 | -5 | -7  | 0.39  | 0.30  |      |
| -  | 12 | 5   | 6     | 1.02  | 0.27 |
| 12 | 5  | -6  | 0.98  | 0.41  |      |
| 12 | -5 | -6  | 1.33  | 0.30  |      |
| -  | 12 | 5   | 5     | 4.53  | 0.42 |
| 12 | 5  | -5  | 4.07  | 0.55  |      |
| 12 | -5 | -5  | 4.26  | 0.48  |      |
| -  | 12 | -5  | 5     | 5.33  | 0.40 |
| 12 | -5 | -5  | 5.37  | 0.45  |      |
| -  | 12 | 5   | 4     | 2.99  | 0.37 |
| 12 | 5  | -4  | 2.87  | 0.48  |      |
| -  | 12 | -5  | 4     | 4.17  | 0.39 |
| 12 | -5 | -4  | 3.81  | 0.40  |      |
| 12 | -5 | -4  | 3.41  | 0.47  |      |
| -  | 12 | 5   | 3     | -0.08 | 0.28 |
| 12 | -5 | -3  | 0.44  | 0.24  |      |
| -  | 12 | -5  | 3     | 0.38  | 0.25 |
| 12 | -5 | -3  | 0.22  | 0.32  |      |
| -  | 12 | 5   | 2     | 0.26  | 0.30 |
| 12 | 5  | -2  | -0.15 | 0.42  |      |
| -  | 12 | -5  | 2     | 0.63  | 0.27 |
| 12 | -5 | -2  | 0.75  | 0.23  |      |
| 12 | -5 | -2  | 1.05  | 0.32  |      |
| -  | 12 | 5   | 1     | 0.62  | 0.31 |
| 12 | 5  | -1  | 0.51  | 0.44  |      |
| -  | 12 | -5  | 1     | 0.71  | 0.28 |
| 12 | -5 | -1  | 1.02  | 0.23  |      |
| 12 | -5 | -1  | 1.29  | 0.34  |      |
| 12 | 5  | 0   | 1.49  | 0.45  |      |
| -  | 12 | 5   | 0     | 1.37  | 0.31 |
| -  | 12 | -5  | 0     | 2.01  | 0.28 |
| 12 | -5 | 0   | 1.80  | 0.24  |      |
| 12 | -5 | 0   | 2.36  | 0.37  |      |
| 12 | 5  | 1   | -0.07 | 0.41  |      |
| -  | 12 | 5   | -1    | -0.19 | 0.32 |
| 12 | -5 | 1   | 0.66  | 0.32  |      |
| -  | 12 | -5  | -1    | 0.45  | 0.29 |
| 12 | -5 | 1   | 0.49  | 0.22  |      |
| -  | 12 | 5   | -2    | 1.28  | 0.37 |
| 12 | 5  | 2   | 1.66  | 0.40  |      |
| 12 | -5 | 2   | 1.90  | 0.39  |      |
| -  | 12 | -5  | -2    | 1.84  | 0.32 |
| -  | 12 | 5   | -3    | 0.00  | 0.34 |
| 12 | 5  | 3   | 0.07  | 0.41  |      |

|    |    |     |       |       |
|----|----|-----|-------|-------|
| 12 | -5 | 3   | 0.57  | 0.39  |
| -  | 12 | -5  | -3    | 0.42  |
| 12 | 5  | 4   | 1.33  | 0.43  |
| -  | 12 | 5   | -4    | 0.90  |
| -  | 12 | -5  | -4    | 1.98  |
| 12 | -5 | 4   | 1.82  | 0.40  |
| -  | 12 | 5   | -5    | 0.99  |
| 12 | 5  | 5   | 1.34  | 0.44  |
| -  | 12 | -5  | -5    | 1.26  |
| 12 | -5 | 5   | 1.38  | 0.47  |
| -  | 12 | 5   | -6    | -0.28 |
| 12 | 5  | 6   | 0.25  | 0.43  |
| 12 | -5 | 6   | 1.17  | 0.49  |
| -  | 12 | -5  | -6    | 0.59  |
| -  | 12 | 5   | -7    | -0.47 |
| 12 | 6  | -12 | -0.49 | 0.44  |
| 12 | -6 | -12 | -0.26 | 0.43  |
| 12 | 6  | -11 | 0.08  | 0.44  |
| 12 | -6 | -11 | -0.26 | 0.36  |
| 12 | 6  | -10 | 0.37  | 0.44  |
| 12 | -6 | -10 | -0.17 | 0.39  |
| 12 | 6  | -9  | 0.82  | 0.43  |
| 12 | -6 | -9  | 0.65  | 0.37  |
| -  | 12 | 6   | 8     | 0.19  |
| 12 | 6  | -8  | -0.09 | 0.42  |
| 12 | -6 | -8  | -0.18 | 0.33  |
| 12 | 6  | -7  | 1.26  | 0.45  |
| -  | 12 | 6   | 7     | 1.65  |
| 12 | -6 | -7  | 1.48  | 0.33  |
| -  | 12 | 6   | 6     | 0.40  |
| 12 | 6  | -6  | 0.19  | 0.38  |
| 12 | -6 | -6  | 0.40  | 0.30  |
| 12 | 6  | -5  | -0.52 | 0.43  |
| -  | 12 | 6   | 5     | -0.14 |
| -  | 12 | -6  | 5     | 0.03  |
| 12 | -6 | -5  | -0.07 | 0.27  |
| -  | 12 | 6   | 4     | 0.32  |
| 12 | 6  | -4  | -0.79 | 0.43  |
| 12 | -6 | -4  | 0.16  | 0.26  |
| 12 | -6 | -4  | 0.28  | 0.30  |
| -  | 12 | -6  | 4     | 0.43  |
| -  | 12 | 6   | 3     | 2.06  |
| 12 | 6  | -3  | 0.72  | 0.46  |
| 12 | -6 | -3  | 2.67  | 0.34  |
| -  | 12 | -6  | 3     | 2.38  |
| 12 | -6 | -3  | 2.44  | 0.28  |
| -  | 12 | 6   | 2     | -0.65 |
| 12 | -6 | -2  | -0.01 | 0.32  |
| 12 | -6 | -2  | -0.05 | 0.23  |
| -  | 12 | -6  | 2     | 0.18  |
| -  | 12 | 6   | 1     | -0.11 |
| 12 | 6  | -1  | -0.73 | 0.42  |
| 12 | -6 | -1  | 0.36  | 0.32  |
| -  | 12 | -6  | 1     | 0.06  |

|    |    |     |       |       |
|----|----|-----|-------|-------|
| 12 | -6 | -1  | 0.06  | 0.24  |
| 12 | 6  | 0   | -0.66 | 0.43  |
| -  | 12 | 6   | 0     | -0.45 |
| 12 | -6 | 0   | 0.02  | 0.22  |
| 12 | -6 | 0   | 0.22  | 0.33  |
| -  | 12 | -6  | 0     | 0.15  |
| -  | 12 | 6   | -1    | -0.34 |
| 12 | 6  | 1   | -0.86 | 0.42  |
| 12 | -6 | 1   | 0.08  | 0.34  |
| 12 | -6 | 1   | -0.27 | 0.23  |
| -  | 12 | -6  | -1    | 0.27  |
| -  | 12 | 6   | -2    | 0.37  |
| 12 | 6  | 2   | 0.42  | 0.39  |
| 12 | -6 | 2   | 1.09  | 0.37  |
| 12 | -6 | 2   | 0.46  | 0.25  |
| -  | 12 | -6  | -2    | 0.67  |
| 12 | 6  | 3   | 0.47  | 0.43  |
| -  | 12 | 6   | -3    | 0.01  |
| 12 | -6 | 3   | 1.19  | 0.41  |
| -  | 12 | -6  | -3    | 0.74  |
| 12 | 6  | 4   | -0.01 | 0.43  |
| -  | 12 | 6   | -4    | -0.51 |
| 12 | -6 | 4   | 0.66  | 0.44  |
| -  | 12 | -6  | -4    | 0.48  |
| 12 | 6  | 5   | 0.10  | 0.42  |
| -  | 12 | 6   | -5    | 0.15  |
| -  | 12 | -6  | -5    | 0.29  |
| 12 | -6 | 5   | 0.18  | 0.42  |
| -  | 12 | 6   | -6    | -0.71 |
| 12 | 6  | 6   | 0.64  | 0.43  |
| 12 | -6 | 6   | 0.40  | 0.49  |
| -  | 12 | -6  | -6    | 0.45  |
| -  | 12 | 6   | -7    | -0.92 |
| 12 | 7  | -12 | -0.50 | 0.46  |
| 12 | 7  | -11 | -0.58 | 0.44  |
| 12 | -7 | -11 | -0.52 | 0.36  |
| 12 | 7  | -10 | -0.15 | 0.45  |
| 12 | -7 | -10 | -0.37 | 0.38  |
| 12 | 7  | -9  | 0.29  | 0.44  |
| 12 | -7 | -9  | -0.25 | 0.36  |
| -  | 12 | 7   | 8     | 0.14  |
| 12 | 7  | -8  | 0.03  | 0.40  |
| 12 | -7 | -8  | 0.13  | 0.33  |
| 12 | 7  | -7  | 0.68  | 0.45  |
| -  | 12 | 7   | 7     | 1.05  |
| 12 | -7 | -7  | 0.70  | 0.32  |
| 12 | 7  | -6  | 0.38  | 0.44  |
| -  | 12 | 7   | 6     | 0.78  |
| 12 | -7 | -6  | 0.75  | 0.30  |
| 12 | 7  | -5  | 0.83  | 0.42  |
| -  | 12 | 7   | 5     | 1.32  |
| 12 | -7 | -5  | 1.09  | 0.29  |
| -  | 12 | 7   | 4     | -0.03 |
| 12 | 7  | -4  | -0.90 | 0.44  |

|   |    |    |     |       |      |
|---|----|----|-----|-------|------|
| - | 12 | -7 | 4   | 0.13  | 0.25 |
|   | 12 | -7 | -4  | -0.08 | 0.26 |
| - | 12 | 7  | 3   | -0.24 | 0.26 |
|   | 12 | -7 | -3  | 0.15  | 0.31 |
|   | 12 | -7 | -3  | 0.33  | 0.26 |
| - | 12 | -7 | 3   | 0.10  | 0.25 |
| - | 12 | 7  | 2   | -0.26 | 0.30 |
|   | 12 | 7  | -2  | -1.11 | 0.44 |
| - | 12 | -7 | 2   | 0.19  | 0.26 |
|   | 12 | -7 | -2  | 0.25  | 0.33 |
|   | 12 | -7 | -2  | 0.57  | 0.25 |
|   | 12 | 7  | -1  | -0.48 | 0.40 |
| - | 12 | 7  | 1   | -0.12 | 0.32 |
|   | 12 | -7 | -1  | 0.52  | 0.24 |
|   | 12 | -7 | -1  | 0.41  | 0.32 |
| - | 12 | -7 | 1   | 0.14  | 0.27 |
| - | 12 | 7  | 0   | 0.40  | 0.30 |
|   | 12 | 7  | 0   | -0.52 | 0.44 |
| - | 12 | -7 | 0   | 0.59  | 0.27 |
|   | 12 | -7 | 0   | 0.53  | 0.24 |
|   | 12 | -7 | 0   | 0.70  | 0.33 |
| - | 12 | 7  | -1  | 0.32  | 0.32 |
|   | 12 | 7  | 1   | 0.12  | 0.45 |
| - | 12 | -7 | -1  | 0.64  | 0.31 |
|   | 12 | -7 | 1   | 0.81  | 0.35 |
|   | 12 | -7 | 1   | 0.57  | 0.26 |
|   | 12 | 7  | 2   | -0.06 | 0.40 |
| - | 12 | 7  | -2  | -0.09 | 0.33 |
| - | 12 | -7 | -2  | 0.30  | 0.32 |
|   | 12 | -7 | 2   | 0.68  | 0.37 |
|   | 12 | -7 | 2   | 0.02  | 0.24 |
|   | 12 | 7  | 3   | -0.28 | 0.43 |
| - | 12 | 7  | -3  | -0.53 | 0.37 |
|   | 12 | -7 | 3   | 0.46  | 0.41 |
| - | 12 | -7 | -3  | 0.25  | 0.33 |
|   | 12 | -7 | 3   | 0.07  | 0.27 |
| - | 12 | 7  | -4  | -0.26 | 0.36 |
|   | 12 | 7  | 4   | -0.04 | 0.43 |
|   | 12 | -7 | 4   | 0.77  | 0.45 |
| - | 12 | -7 | -4  | 0.44  | 0.35 |
| - | 12 | 7  | -5  | 0.33  | 0.42 |
|   | 12 | 7  | 5   | 0.58  | 0.44 |
|   | 12 | -7 | 5   | 1.15  | 0.43 |
| - | 12 | -7 | -5  | 1.27  | 0.38 |
|   | 12 | 7  | 6   | 0.15  | 0.43 |
| - | 12 | 7  | -6  | -0.25 | 0.43 |
|   | 12 | 8  | -11 | 0.22  | 0.46 |
|   | 12 | -8 | -11 | 0.37  | 0.41 |
|   | 12 | 8  | -10 | -0.12 | 0.47 |
|   | 12 | -8 | -10 | -0.21 | 0.38 |
|   | 12 | 8  | -9  | 0.40  | 0.46 |
|   | 12 | -8 | -9  | -0.19 | 0.33 |
|   | 12 | 8  | -8  | 0.49  | 0.48 |
| - | 12 | 8  | 8   | 0.46  | 0.30 |

|    |    |    |       |       |
|----|----|----|-------|-------|
| 12 | -8 | -8 | 0.33  | 0.34  |
| -  | 12 | 8  | 7     | 0.10  |
| 12 | 8  | -7 | -0.16 | 0.46  |
| 12 | -8 | -7 | 0.02  | 0.32  |
| 12 | 8  | -6 | 0.12  | 0.47  |
| -  | 12 | 8  | 6     | 0.15  |
| 12 | -8 | -6 | 0.21  | 0.30  |
| 12 | 8  | -5 | 0.36  | 0.47  |
| -  | 12 | 8  | 5     | 0.80  |
| 12 | -8 | -5 | 0.85  | 0.27  |
| 12 | 8  | -4 | -0.99 | 0.46  |
| -  | 12 | 8  | 4     | -0.14 |
| -  | 12 | -8 | 4     | 0.01  |
| 12 | -8 | -4 | 0.32  | 0.27  |
| 12 | 8  | -3 | 2.26  | 0.53  |
| -  | 12 | 8  | 3     | 2.90  |
| 12 | -8 | -3 | 3.15  | 0.31  |
| -  | 12 | -8 | 3     | 3.88  |
| -  | 12 | 8  | 2     | 3.14  |
| 12 | 8  | -2 | 2.37  | 0.53  |
| 12 | -8 | -2 | 4.63  | 0.48  |
| 12 | -8 | -2 | 4.05  | 0.41  |
| -  | 12 | -8 | 2     | 4.06  |
| -  | 12 | 8  | 1     | 4.39  |
| 12 | 8  | -1 | 3.75  | 0.55  |
| 12 | -8 | -1 | 4.85  | 0.42  |
| 12 | -8 | -1 | 5.28  | 0.47  |
| -  | 12 | -8 | 1     | 4.97  |
| 12 | 8  | 0  | -0.98 | 0.44  |
| -  | 12 | 8  | 0     | -0.64 |
| -  | 12 | -8 | 0     | 0.15  |
| 12 | -8 | 0  | 0.16  | 0.25  |
| 12 | -8 | 0  | 0.14  | 0.32  |
| -  | 12 | 8  | -1    | -0.63 |
| 12 | -8 | 1  | 0.24  | 0.34  |
| 12 | -8 | 1  | -0.22 | 0.24  |
| -  | 12 | -8 | -1    | 0.39  |
| -  | 12 | 8  | -2    | -0.75 |
| -  | 12 | -8 | -2    | 0.46  |
| 12 | -8 | 2  | 0.05  | 0.25  |
| 12 | -8 | 2  | 0.34  | 0.38  |
| 12 | 8  | 3  | -0.46 | 0.44  |
| -  | 12 | 8  | -3    | -0.43 |
| 12 | -8 | 3  | 0.44  | 0.42  |
| 12 | -8 | 3  | -0.02 | 0.26  |
| -  | 12 | -8 | -3    | 0.27  |
| -  | 12 | 8  | -4    | -0.76 |
| 12 | 8  | 4  | -0.38 | 0.43  |
| 12 | -8 | 4  | 0.73  | 0.45  |
| 12 | -8 | 4  | -0.31 | 0.29  |
| -  | 12 | -8 | -4    | 0.58  |
| 12 | 8  | 5  | -0.16 | 0.44  |
| -  | 12 | 8  | -5    | -0.84 |
| -  | 12 | -8 | -5    | 0.03  |

|    |    |     |       |       |
|----|----|-----|-------|-------|
| 12 | -8 | 5   | 0.25  | 0.46  |
| 12 | 8  | 6   | -0.32 | 0.44  |
| -  | 12 | 8   | -6    | -0.40 |
| 12 | 9  | -11 | -0.12 | 0.49  |
| 12 | -9 | -11 | -0.49 | 0.38  |
| 12 | 9  | -10 | 1.23  | 0.51  |
| 12 | -9 | -10 | 1.02  | 0.40  |
| 12 | 9  | -9  | 0.22  | 0.48  |
| 12 | -9 | -9  | 0.50  | 0.37  |
| -  | 12 | 9   | 8     | 0.24  |
| 12 | 9  | -8  | -0.40 | 0.48  |
| 12 | -9 | -8  | 0.51  | 0.35  |
| 12 | 9  | -7  | -0.05 | 0.48  |
| -  | 12 | 9   | 7     | 0.04  |
| 12 | -9 | -7  | -0.02 | 0.33  |
| 12 | 9  | -6  | 0.50  | 0.45  |
| -  | 12 | 9   | 6     | 0.53  |
| 12 | -9 | -6  | 0.90  | 0.31  |
| -  | 12 | 9   | 5     | 0.07  |
| 12 | 9  | -5  | -0.38 | 0.48  |
| 12 | -9 | -5  | 0.25  | 0.30  |
| 12 | 9  | -4  | 0.10  | 0.50  |
| -  | 12 | 9   | 4     | 0.90  |
| -  | 12 | -9  | 4     | 1.06  |
| 12 | -9 | -4  | 0.64  | 0.28  |
| -  | 12 | 9   | 3     | 0.28  |
| 12 | 9  | -3  | -0.42 | 0.49  |
| -  | 12 | -9  | 3     | 0.73  |
| 12 | -9 | -3  | 0.63  | 0.28  |
| 12 | 9  | -2  | -0.76 | 0.49  |
| -  | 12 | 9   | 2     | 0.61  |
| -  | 12 | -9  | 2     | 1.50  |
| 12 | -9 | -2  | 1.11  | 0.25  |
| -  | 12 | 9   | 1     | -0.20 |
| 12 | -9 | -1  | 0.18  | 0.26  |
| -  | 12 | -9  | 1     | 0.23  |
| 12 | -9 | -1  | 0.55  | 0.33  |
| 12 | 9  | 0   | -1.03 | 0.46  |
| -  | 12 | 9   | 0     | -0.72 |
| -  | 12 | -9  | 0     | -0.02 |
| 12 | -9 | 0   | 0.11  | 0.26  |
| 12 | -9 | 0   | 0.39  | 0.34  |
| 12 | 9  | 1   | -0.63 | 0.46  |
| -  | 12 | 9   | -1    | 0.49  |
| -  | 12 | -9  | -1    | 1.00  |
| 12 | -9 | 1   | 1.07  | 0.27  |
| 12 | -9 | 1   | 1.27  | 0.36  |
| -  | 12 | 9   | -2    | -0.74 |
| -  | 12 | -9  | -2    | 0.32  |
| 12 | -9 | 2   | 0.50  | 0.38  |
| 12 | -9 | 2   | 0.23  | 0.27  |
| 12 | 9  | 3   | -0.35 | 0.45  |
| -  | 12 | 9   | -3    | -0.45 |
| 12 | -9 | 3   | 0.14  | 0.30  |

|   |    |     |     |       |      |
|---|----|-----|-----|-------|------|
| - | 12 | -9  | -3  | 0.49  | 0.36 |
|   | 12 | -9  | 3   | 0.53  | 0.42 |
|   | 12 | 9   | 4   | 0.31  | 0.46 |
| - | 12 | 9   | -4  | 0.48  | 0.42 |
|   | 12 | -9  | 4   | 1.94  | 0.46 |
|   | 12 | -9  | 4   | 0.81  | 0.31 |
| - | 12 | -9  | -4  | 1.26  | 0.39 |
|   | 12 | 9   | 5   | -0.48 | 0.43 |
| - | 12 | 9   | -5  | -1.12 | 0.42 |
| - | 12 | -9  | -5  | 0.31  | 0.36 |
|   | 12 | -9  | 5   | 1.20  | 0.48 |
|   | 12 | 10  | -10 | -0.17 | 0.52 |
|   | 12 | -10 | -10 | -0.33 | 0.40 |
|   | 12 | 10  | -9  | -0.61 | 0.52 |
|   | 12 | -10 | -9  | 0.18  | 0.37 |
| - | 12 | 10  | 8   | 0.36  | 0.31 |
|   | 12 | 10  | -8  | -0.06 | 0.49 |
|   | 12 | -10 | -8  | -0.08 | 0.35 |
|   | 12 | 10  | -7  | 1.22  | 0.53 |
| - | 12 | 10  | 7   | 1.49  | 0.32 |
|   | 12 | -10 | -7  | 1.52  | 0.36 |
| - | 12 | 10  | 6   | 0.96  | 0.32 |
|   | 12 | 10  | -6  | 0.51  | 0.51 |
|   | 12 | -10 | -6  | 1.38  | 0.33 |
| - | 12 | 10  | 5   | -0.17 | 0.28 |
|   | 12 | 10  | -5  | -0.96 | 0.50 |
|   | 12 | -10 | -5  | -0.06 | 0.30 |
| - | 12 | 10  | 4   | 1.08  | 0.31 |
|   | 12 | 10  | -4  | 0.28  | 0.51 |
|   | 12 | -10 | -4  | 1.56  | 0.30 |
| - | 12 | 10  | 3   | 0.66  | 0.33 |
|   | 12 | 10  | -3  | 0.15  | 0.51 |
|   | 12 | -10 | -3  | 1.17  | 0.29 |
| - | 12 | -10 | 3   | 1.15  | 0.28 |
|   | 12 | 10  | -2  | -1.10 | 0.49 |
| - | 12 | 10  | 2   | -0.25 | 0.33 |
|   | 12 | -10 | -2  | 0.13  | 0.27 |
| - | 12 | -10 | 2   | 0.05  | 0.29 |
| - | 12 | 10  | 1   | -0.21 | 0.34 |
| - | 12 | -10 | 1   | 0.06  | 0.31 |
|   | 12 | -10 | -1  | 0.25  | 0.27 |
| - | 12 | 10  | 0   | -0.69 | 0.34 |
| - | 12 | -10 | 0   | 0.17  | 0.32 |
|   | 12 | -10 | 0   | 0.34  | 0.32 |
|   | 12 | -10 | 0   | -0.10 | 0.24 |
| - | 12 | 10  | -1  | -0.26 | 0.35 |
|   | 12 | 10  | 1   | -0.77 | 0.42 |
|   | 12 | -10 | 1   | 0.86  | 0.37 |
| - | 12 | -10 | -1  | 0.70  | 0.34 |
|   | 12 | -10 | 1   | 0.35  | 0.28 |
|   | 12 | 10  | 2   | -0.62 | 0.41 |
| - | 12 | 10  | -2  | 0.06  | 0.37 |
|   | 12 | -10 | 2   | 0.71  | 0.39 |
|   | 12 | -10 | 2   | 0.91  | 0.29 |

|   |    |     |    |       |      |
|---|----|-----|----|-------|------|
| - | 12 | -10 | -2 | 0.71  | 0.35 |
|   | 12 | 10  | 3  | -0.32 | 0.45 |
| - | 12 | 10  | -3 | -0.34 | 0.39 |
| - | 12 | -10 | -3 | 0.61  | 0.37 |
|   | 12 | -10 | 3  | 1.33  | 0.44 |
|   | 12 | -10 | 3  | 0.72  | 0.30 |
|   | 12 | 10  | 4  | -0.77 | 0.48 |
| - | 12 | 10  | -4 | -0.47 | 0.40 |
|   | 12 | -10 | 4  | 0.36  | 0.31 |
|   | 12 | -10 | 4  | 1.45  | 0.46 |
| - | 12 | -10 | -4 | 0.51  | 0.39 |
|   | 12 | 10  | 5  | -0.55 | 0.48 |
| - | 12 | 10  | -5 | -0.60 | 0.41 |
|   | 12 | 11  | -9 | -0.29 | 0.54 |
|   | 12 | -11 | -9 | -0.22 | 0.37 |
|   | 12 | 11  | -8 | 0.25  | 0.48 |
| - | 12 | 11  | 8  | 0.45  | 0.31 |
|   | 12 | -11 | -8 | 0.56  | 0.36 |
| - | 12 | 11  | 7  | -0.05 | 0.28 |
|   | 12 | 11  | -7 | -0.29 | 0.49 |
|   | 12 | -11 | -7 | 0.08  | 0.35 |
|   | 12 | 11  | -6 | 2.11  | 0.56 |
| - | 12 | 11  | 6  | 2.97  | 0.36 |
|   | 12 | -11 | -6 | 3.25  | 0.37 |
|   | 12 | 11  | -5 | -0.69 | 0.53 |
| - | 12 | 11  | 5  | 0.09  | 0.32 |
|   | 12 | -11 | -5 | 0.24  | 0.32 |
| - | 12 | 11  | 4  | 0.03  | 0.33 |
|   | 12 | 11  | -4 | -0.71 | 0.47 |
|   | 12 | -11 | -4 | 0.27  | 0.30 |
| - | 12 | 11  | 3  | 0.49  | 0.32 |
|   | 12 | 11  | -3 | -1.09 | 0.51 |
|   | 12 | -11 | -3 | 0.84  | 0.30 |
| - | 12 | -11 | 3  | 0.55  | 0.28 |
| - | 12 | 11  | 2  | 0.27  | 0.35 |
|   | 12 | 11  | -2 | -0.39 | 0.47 |
| - | 12 | -11 | 2  | 0.90  | 0.31 |
|   | 12 | -11 | -2 | 0.56  | 0.29 |
| - | 12 | 11  | 1  | -0.12 | 0.35 |
| - | 12 | -11 | 1  | 0.15  | 0.31 |
|   | 12 | -11 | -1 | 0.15  | 0.28 |
| - | 12 | 11  | 0  | -0.77 | 0.36 |
| - | 12 | -11 | 0  | 0.34  | 0.33 |
|   | 12 | -11 | 0  | 0.08  | 0.28 |
| - | 12 | 11  | -1 | -0.89 | 0.33 |
|   | 12 | -11 | 1  | 0.17  | 0.29 |
|   | 12 | -11 | 1  | 0.49  | 0.38 |
| - | 12 | -11 | -1 | 0.30  | 0.34 |
| - | 12 | 11  | -2 | -0.52 | 0.35 |
|   | 12 | 11  | 2  | -1.18 | 0.47 |
|   | 12 | -11 | 2  | 0.27  | 0.30 |
| - | 12 | -11 | -2 | 0.38  | 0.35 |
|   | 12 | -11 | 2  | 0.37  | 0.40 |
| - | 12 | 11  | -3 | -1.01 | 0.39 |

|    |     |     |       |            |
|----|-----|-----|-------|------------|
| 12 | 11  | 3   | -1.02 | 0.45       |
| 12 | -11 | 3   | -0.18 | 0.30       |
| 12 | -11 | 3   | 1.01  | 0.44       |
| -  | 12  | -11 | -3    | 0.14 0.37  |
| 12 | 11  | 4   | -0.59 | 0.44       |
| -  | 12  | 11  | -4    | -0.89 0.41 |
| 12 | -11 | 4   | 0.34  | 0.33       |
| 12 | 11  | 5   | -0.39 | 0.45       |
| 12 | -12 | -9  | -0.16 | 0.35       |
| 12 | 12  | -8  | -0.38 | 0.54       |
| 12 | -12 | -8  | 0.09  | 0.37       |
| 12 | 12  | -7  | 0.08  | 0.54       |
| -  | 12  | 12  | 7     | -0.10 0.33 |
| 12 | -12 | -7  | -0.04 | 0.35       |
| 12 | 12  | -6  | 0.03  | 0.55       |
| -  | 12  | 12  | 6     | 0.17 0.33  |
| 12 | -12 | -6  | 0.38  | 0.34       |
| 12 | 12  | -5  | -0.35 | 0.54       |
| -  | 12  | 12  | 5     | -0.37 0.33 |
| 12 | -12 | -5  | 0.27  | 0.33       |
| 12 | 12  | -4  | -0.67 | 0.53       |
| -  | 12  | 12  | 4     | 0.25 0.35  |
| 12 | -12 | -4  | 0.37  | 0.29       |
| 12 | 12  | -3  | 0.19  | 0.55       |
| -  | 12  | 12  | 3     | 1.13 0.37  |
| -  | 12  | -12 | 3     | 1.79 0.31  |
| 12 | -12 | -3  | 1.24  | 0.32       |
| -  | 12  | 12  | 2     | 1.24 0.38  |
| 12 | 12  | -2  | 0.34  | 0.54       |
| 12 | -12 | -2  | 1.29  | 0.31       |
| -  | 12  | -12 | 2     | 1.60 0.32  |
| -  | 12  | 12  | 1     | 0.91 0.38  |
| -  | 12  | -12 | 1     | 1.60 0.33  |
| 12 | -12 | -1  | 1.19  | 0.31       |
| -  | 12  | 12  | 0     | -0.07 0.37 |
| 12 | -12 | 0   | 0.30  | 0.29       |
| -  | 12  | -12 | 0     | 0.62 0.33  |
| -  | 12  | 12  | -1    | -0.34 0.35 |
| 12 | -12 | 1   | 0.05  | 0.30       |
| -  | 12  | -12 | -1    | 0.50 0.34  |
| -  | 12  | 12  | -2    | -0.59 0.39 |
| -  | 12  | -12 | -2    | 0.24 0.36  |
| 12 | -12 | 2   | 0.11  | 0.31       |
| 12 | -12 | 2   | 0.35  | 0.40       |
| 12 | 12  | 3   | -1.09 | 0.45       |
| -  | 12  | 12  | -3    | -0.80 0.37 |
| 12 | -12 | 3   | 1.02  | 0.43       |
| 12 | -12 | 3   | 0.24  | 0.33       |
| -  | 12  | -12 | -3    | 0.01 0.37  |
| 12 | 12  | 4   | -0.71 | 0.46       |
| 12 | -12 | 4   | 1.19  | 0.47       |
| 12 | -13 | -8  | 0.60  | 0.39       |
| -  | 12  | 13  | 7     | -0.18 0.30 |
| 12 | 13  | -7  | 0.11  | 0.57       |

|    |     |     |       |       |
|----|-----|-----|-------|-------|
| 12 | -13 | -7  | 0.56  | 0.36  |
| 12 | 13  | -6  | -0.04 | 0.58  |
| -  | 12  | 13  | 6     | 0.25  |
| 12 | -13 | -6  | 0.42  | 0.34  |
| 12 | 13  | -5  | -0.31 | 0.56  |
| -  | 12  | 13  | 5     | 0.92  |
| 12 | -13 | -5  | 1.05  | 0.35  |
| 12 | 13  | -4  | -1.07 | 0.55  |
| -  | 12  | 13  | 4     | -0.16 |
| 12 | -13 | -4  | 0.40  | 0.30  |
| -  | 12  | 13  | 3     | 0.82  |
| 12 | 13  | -3  | 0.08  | 0.55  |
| 12 | -13 | -3  | 1.16  | 0.33  |
| -  | 12  | 13  | 2     | -0.33 |
| 12 | 13  | -2  | -0.92 | 0.53  |
| 12 | -13 | -2  | 0.55  | 0.32  |
| -  | 12  | -13 | 2     | 0.46  |
| -  | 12  | 13  | 1     | 0.72  |
| 12 | 13  | -1  | -0.73 | 0.53  |
| 12 | -13 | -1  | 0.91  | 0.29  |
| -  | 12  | -13 | 1     | 1.08  |
| -  | 12  | 13  | 0     | -0.06 |
| -  | 12  | -13 | 0     | 0.50  |
| 12 | -13 | 0   | 0.16  | 0.31  |
| -  | 12  | 13  | -1    | -0.43 |
| 12 | -13 | 1   | -0.25 | 0.28  |
| -  | 12  | -13 | -1    | 0.14  |
| -  | 12  | 13  | -2    | -0.69 |
| -  | 12  | -13 | -2    | 0.49  |
| 12 | -13 | 2   | -0.19 | 0.32  |
| -  | 12  | 14  | 6     | 0.23  |
| 12 | 14  | -6  | -0.79 | 0.58  |
| 12 | -14 | -6  | 0.29  | 0.33  |
| -  | 12  | 14  | 5     | 0.06  |
| 12 | 14  | -5  | -0.87 | 0.58  |
| 12 | -14 | -5  | 0.01  | 0.35  |
| -  | 12  | 14  | 4     | 0.12  |
| 12 | 14  | -4  | -0.61 | 0.56  |
| 12 | -14 | -4  | -0.20 | 0.33  |
| 12 | 14  | -3  | -1.51 | 0.56  |
| -  | 12  | 14  | 3     | -0.45 |
| 12 | -14 | -3  | 0.34  | 0.33  |
| -  | 12  | 14  | 2     | -0.02 |
| 12 | 14  | -2  | -1.10 | 0.54  |
| 12 | -14 | -2  | 0.19  | 0.33  |
| -  | 12  | -14 | 2     | 0.40  |
| -  | 12  | 14  | 1     | 0.16  |
| 12 | 14  | -1  | -1.27 | 0.52  |
| 12 | -14 | -1  | 0.64  | 0.32  |
| -  | 12  | -14 | 1     | 0.91  |
| -  | 12  | 14  | 0     | 0.28  |
| -  | 12  | -14 | 0     | 0.02  |
| 12 | -14 | 0   | 0.18  | 0.32  |
| -  | 12  | 14  | -1    | 1.16  |

|   |    |     |    |       |      |
|---|----|-----|----|-------|------|
| - | 12 | -14 | -1 | 2.12  | 0.39 |
|   | 12 | -14 | 1  | 1.43  | 0.35 |
|   | 12 | 15  | -5 | -0.99 | 0.60 |
| - | 12 | 15  | 5  | 0.08  | 0.34 |
|   | 12 | 15  | -4 | -0.40 | 0.59 |
| - | 12 | 15  | 4  | 0.16  | 0.35 |
|   | 12 | -15 | -4 | 0.36  | 0.32 |
|   | 12 | 15  | -3 | -0.35 | 0.58 |
| - | 12 | 15  | 3  | 0.44  | 0.38 |
|   | 12 | -15 | -3 | 0.64  | 0.34 |
|   | 12 | 15  | -2 | -0.43 | 0.57 |
| - | 12 | 15  | 2  | 0.52  | 0.41 |
| - | 12 | -15 | 2  | 1.00  | 0.33 |
|   | 12 | -15 | -2 | 0.60  | 0.35 |
|   | 12 | 15  | -1 | 0.28  | 0.57 |
|   | 12 | -15 | -1 | 1.50  | 0.36 |
| - | 12 | -15 | 1  | 1.68  | 0.36 |
| - | 12 | -15 | 0  | 0.55  | 0.36 |
| - | 12 | -16 | 1  | -0.02 | 0.35 |
|   | 13 | 0   | -8 | -0.15 | 0.36 |
|   | 13 | 0   | -7 | -0.11 | 0.36 |
| - | 13 | 0   | 6  | 0.74  | 0.27 |
|   | 13 | 0   | -6 | 0.45  | 0.38 |
|   | 13 | 0   | -5 | -0.68 | 0.37 |
| - | 13 | 0   | 5  | -0.36 | 0.26 |
|   | 13 | 0   | -4 | 0.42  | 0.38 |
| - | 13 | 0   | 4  | 0.57  | 0.26 |
|   | 13 | 0   | -3 | -0.23 | 0.40 |
| - | 13 | 0   | 3  | -0.14 | 0.29 |
| - | 13 | 0   | 2  | 0.16  | 0.28 |
|   | 13 | 0   | -2 | 0.11  | 0.36 |
| - | 13 | 0   | 1  | -0.13 | 0.28 |
|   | 13 | 0   | -1 | -0.17 | 0.40 |
|   | 13 | 0   | 0  | 4.46  | 0.58 |
| - | 13 | 0   | 0  | 3.95  | 0.44 |
|   | 13 | 0   | 1  | 0.20  | 0.41 |
| - | 13 | 0   | -1 | -0.27 | 0.33 |
|   | 13 | 0   | 2  | 0.46  | 0.42 |
| - | 13 | 0   | -2 | 0.19  | 0.35 |
|   | 13 | 0   | 3  | 0.03  | 0.38 |
| - | 13 | 0   | -3 | 0.02  | 0.36 |
|   | 13 | 0   | 4  | 0.41  | 0.43 |
| - | 13 | 0   | -4 | 0.55  | 0.39 |
| - | 13 | 0   | -5 | -0.20 | 0.37 |
|   | 13 | 0   | 5  | -0.17 | 0.41 |
|   | 13 | 1   | -9 | -0.44 | 0.37 |
|   | 13 | 1   | -8 | -0.08 | 0.37 |
|   | 13 | -1  | -8 | -0.06 | 0.34 |
|   | 13 | 1   | -7 | 3.66  | 0.45 |
|   | 13 | -1  | -7 | 3.85  | 0.44 |
|   | 13 | 1   | -6 | -0.17 | 0.38 |
| - | 13 | 1   | 6  | -0.23 | 0.26 |
|   | 13 | -1  | -6 | -0.36 | 0.35 |
| - | 13 | -1  | 6  | -0.24 | 0.27 |

|    |    |     |       |       |
|----|----|-----|-------|-------|
| 13 | 1  | -5  | -0.77 | 0.37  |
| -  | 13 | 1   | 5     | -0.50 |
| -  | 13 | -1  | 5     | -0.01 |
| 13 | -1 | -5  | -0.33 | 0.34  |
| -  | 13 | 1   | 4     | 0.19  |
| 13 | 1  | -4  | 0.06  | 0.39  |
| -  | 13 | -1  | 4     | 0.06  |
| 13 | -1 | -4  | -0.10 | 0.36  |
| -  | 13 | 1   | 3     | 0.05  |
| 13 | 1  | -3  | -0.36 | 0.40  |
| -  | 13 | -1  | 3     | 0.10  |
| 13 | -1 | -3  | -0.05 | 0.39  |
| 13 | 1  | -2  | -0.44 | 0.41  |
| -  | 13 | 1   | 2     | -0.24 |
| -  | 13 | -1  | 2     | 0.05  |
| 13 | -1 | -2  | -0.05 | 0.38  |
| 13 | 1  | -1  | 1.28  | 0.43  |
| -  | 13 | 1   | 1     | 0.89  |
| 13 | -1 | -1  | 1.03  | 0.40  |
| -  | 13 | -1  | 1     | 1.18  |
| 13 | 1  | 0   | 0.30  | 0.38  |
| -  | 13 | 1   | 0     | 0.14  |
| 13 | -1 | 0   | 0.23  | 0.39  |
| -  | 13 | -1  | 0     | -0.19 |
| -  | 13 | 1   | -1    | 1.70  |
| 13 | 1  | 1   | 1.86  | 0.40  |
| 13 | -1 | 1   | 1.99  | 0.43  |
| -  | 13 | -1  | -1    | 1.62  |
| 13 | 1  | 2   | 1.12  | 0.40  |
| -  | 13 | 1   | -2    | 0.99  |
| 13 | -1 | 2   | 1.74  | 0.43  |
| -  | 13 | -1  | -2    | 1.17  |
| -  | 13 | 1   | -3    | 2.45  |
| 13 | 1  | 3   | 2.63  | 0.47  |
| -  | 13 | -1  | -3    | 2.58  |
| 13 | -1 | 3   | 3.28  | 0.46  |
| -  | 13 | 1   | -4    | -0.15 |
| 13 | 1  | 4   | 0.12  | 0.43  |
| 13 | -1 | 4   | 0.75  | 0.44  |
| -  | 13 | -1  | -4    | 0.23  |
| -  | 13 | 1   | -5    | -0.13 |
| 13 | 1  | 5   | 0.08  | 0.45  |
| 13 | -1 | 5   | 0.76  | 0.46  |
| -  | 13 | -1  | -5    | 0.28  |
| 13 | 2  | -10 | 0.84  | 0.40  |
| 13 | 2  | -9  | -0.12 | 0.41  |
| 13 | 2  | -8  | 3.17  | 0.45  |
| -  | 13 | 2   | 7     | 0.19  |
| 13 | 2  | -7  | 0.22  | 0.39  |
| 13 | -2 | -7  | 0.07  | 0.35  |
| 13 | 2  | -6  | -0.48 | 0.38  |
| -  | 13 | 2   | 6     | -0.06 |
| 13 | -2 | -6  | -0.64 | 0.33  |
| -  | 13 | -2  | 6     | -0.16 |

|    |    |     |       |       |
|----|----|-----|-------|-------|
| 13 | 2  | -5  | -0.46 | 0.40  |
| -  | 13 | 2   | 5     | -0.18 |
| -  | 13 | -2  | 5     | -0.10 |
| 13 | -2 | -5  | -0.40 | 0.34  |
| 13 | 2  | -4  | 0.47  | 0.41  |
| -  | 13 | 2   | 4     | 0.48  |
| 13 | -2 | -4  | 0.73  | 0.36  |
| -  | 13 | -2  | 4     | 0.85  |
| 13 | 2  | -3  | -0.77 | 0.40  |
| -  | 13 | 2   | 3     | -0.34 |
| 13 | -2 | -3  | -0.04 | 0.37  |
| -  | 13 | -2  | 3     | 0.43  |
| -  | 13 | 2   | 2     | 0.08  |
| 13 | 2  | -2  | -0.45 | 0.39  |
| 13 | -2 | -2  | -0.11 | 0.38  |
| -  | 13 | -2  | 2     | -0.11 |
| 13 | 2  | -1  | -0.46 | 0.42  |
| -  | 13 | 2   | 1     | 0.20  |
| 13 | -2 | -1  | 0.08  | 0.38  |
| -  | 13 | -2  | 1     | 0.17  |
| 13 | 2  | 0   | -0.19 | 0.43  |
| -  | 13 | 2   | 0     | 0.11  |
| 13 | -2 | 0   | 0.56  | 0.39  |
| -  | 13 | -2  | 0     | 0.02  |
| 13 | 2  | 1   | -0.02 | 0.42  |
| -  | 13 | 2   | -1    | -0.09 |
| 13 | -2 | 1   | 0.28  | 0.41  |
| -  | 13 | -2  | -1    | -0.06 |
| -  | 13 | 2   | -2    | 0.15  |
| 13 | 2  | 2   | 0.15  | 0.41  |
| -  | 13 | -2  | -2    | 0.31  |
| 13 | -2 | 2   | 0.36  | 0.40  |
| 13 | 2  | 3   | 1.00  | 0.45  |
| -  | 13 | 2   | -3    | 0.89  |
| -  | 13 | -2  | -3    | 0.78  |
| 13 | -2 | 3   | 1.22  | 0.44  |
| -  | 13 | 2   | -4    | 0.01  |
| 13 | 2  | 4   | 0.59  | 0.41  |
| -  | 13 | -2  | -4    | 0.42  |
| 13 | -2 | 4   | 0.27  | 0.39  |
| -  | 13 | 2   | -5    | 0.59  |
| 13 | 2  | 5   | 0.94  | 0.46  |
| 13 | -2 | 5   | 1.49  | 0.46  |
| -  | 13 | -2  | -5    | 1.02  |
| 13 | -3 | -12 | -0.97 | 0.43  |
| 13 | -3 | -11 | -0.11 | 0.41  |
| 13 | 3  | -10 | -0.38 | 0.39  |
| 13 | -3 | -10 | -0.86 | 0.38  |
| 13 | 3  | -9  | -0.59 | 0.40  |
| 13 | -3 | -9  | -0.57 | 0.37  |
| 13 | 3  | -8  | 0.41  | 0.41  |
| 13 | -3 | -8  | 0.24  | 0.34  |
| -  | 13 | 3   | 7     | 0.16  |
| 13 | 3  | -7  | 0.14  | 0.40  |

|    |    |     |       |       |      |
|----|----|-----|-------|-------|------|
| 13 | 3  | -6  | 3.65  | 0.49  |      |
| -  | 13 | 3   | 6     | 3.74  | 0.42 |
| 13 | -3 | -6  | 3.53  | 0.48  |      |
| 13 | 3  | -5  | -0.87 | 0.41  |      |
| -  | 13 | 3   | 5     | -0.33 | 0.28 |
| -  | 13 | -3  | 5     | 0.41  | 0.27 |
| 13 | -3 | -5  | -0.14 | 0.33  |      |
| 13 | 3  | -4  | -0.20 | 0.44  |      |
| -  | 13 | 3   | 4     | 0.96  | 0.30 |
| -  | 13 | -3  | 4     | 0.77  | 0.28 |
| 13 | -3 | -4  | 0.87  | 0.35  |      |
| -  | 13 | 3   | 3     | 2.49  | 0.34 |
| 13 | 3  | -3  | 2.20  | 0.47  |      |
| -  | 13 | -3  | 3     | 2.63  | 0.32 |
| 13 | -3 | -3  | 2.92  | 0.42  |      |
| 13 | 3  | -2  | -1.08 | 0.43  |      |
| -  | 13 | 3   | 2     | -0.09 | 0.31 |
| -  | 13 | -3  | 2     | 0.06  | 0.30 |
| 13 | -3 | -2  | -0.08 | 0.37  |      |
| -  | 13 | 3   | 1     | -0.12 | 0.33 |
| 13 | 3  | -1  | -0.48 | 0.44  |      |
| 13 | -3 | -1  | 0.31  | 0.37  |      |
| -  | 13 | -3  | 1     | 0.17  | 0.31 |
| 13 | 3  | 0   | -0.32 | 0.43  |      |
| -  | 13 | 3   | 0     | 0.08  | 0.31 |
| -  | 13 | -3  | 0     | 0.12  | 0.29 |
| 13 | -3 | 0   | 0.35  | 0.39  |      |
| -  | 13 | 3   | -1    | -0.01 | 0.35 |
| 13 | 3  | 1   | 0.28  | 0.40  |      |
| -  | 13 | -3  | -1    | 0.73  | 0.30 |
| 13 | -3 | 1   | 0.58  | 0.40  |      |
| -  | 13 | 3   | -2    | 0.03  | 0.34 |
| 13 | 3  | 2   | 0.13  | 0.43  |      |
| 13 | -3 | 2   | 0.53  | 0.41  |      |
| -  | 13 | -3  | -2    | -0.05 | 0.30 |
| -  | 13 | 3   | -3    | 1.00  | 0.37 |
| 13 | 3  | 3   | 1.47  | 0.44  |      |
| -  | 13 | -3  | -3    | 1.61  | 0.36 |
| 13 | -3 | 3   | 1.87  | 0.44  |      |
| -  | 13 | 3   | -4    | 0.93  | 0.42 |
| 13 | 3  | 4   | 1.62  | 0.46  |      |
| 13 | -3 | 4   | 1.78  | 0.41  |      |
| -  | 13 | -3  | -4    | 1.79  | 0.38 |
| -  | 13 | 3   | -5    | -0.25 | 0.42 |
| 13 | 3  | 5   | 0.10  | 0.45  |      |
| -  | 13 | -3  | -5    | 0.22  | 0.39 |
| 13 | -3 | 5   | 0.43  | 0.45  |      |
| 13 | -4 | -12 | -0.29 | 0.47  |      |
| 13 | 4  | -11 | -0.17 | 0.44  |      |
| 13 | -4 | -11 | -0.51 | 0.41  |      |
| 13 | 4  | -10 | -0.26 | 0.42  |      |
| 13 | -4 | -10 | -0.98 | 0.40  |      |
| 13 | 4  | -9  | -0.18 | 0.43  |      |
| 13 | -4 | -9  | -0.19 | 0.37  |      |

|    |    |     |       |       |
|----|----|-----|-------|-------|
| 13 | 4  | -8  | -0.21 | 0.42  |
| 13 | -4 | -8  | 0.12  | 0.35  |
| -  | 13 | 4   | 7     | 1.69  |
| 13 | 4  | -7  | 1.26  | 0.45  |
| 13 | -4 | -7  | 2.65  | 0.35  |
| 13 | 4  | -6  | -0.64 | 0.43  |
| -  | 13 | 4   | 6     | -0.29 |
| 13 | -4 | -6  | 0.20  | 0.31  |
| 13 | 4  | -5  | -0.87 | 0.39  |
| -  | 13 | 4   | 5     | -0.63 |
| -  | 13 | -4  | 5     | 0.14  |
| 13 | -4 | -5  | -0.13 | 0.31  |
| 13 | -4 | -5  | -0.09 | 0.30  |
| -  | 13 | 4   | 4     | -0.31 |
| 13 | 4  | -4  | -0.99 | 0.39  |
| -  | 13 | -4  | 4     | -0.38 |
| 13 | -4 | -4  | -0.07 | 0.36  |
| -  | 13 | 4   | 3     | -0.16 |
| 13 | 4  | -3  | -1.19 | 0.44  |
| 13 | -4 | -3  | 0.34  | 0.35  |
| -  | 13 | -4  | 3     | 0.07  |
| 13 | 4  | -2  | -0.66 | 0.45  |
| -  | 13 | 4   | 2     | -0.34 |
| -  | 13 | -4  | 2     | 0.09  |
| 13 | -4 | -2  | 0.50  | 0.36  |
| 13 | 4  | -1  | -0.88 | 0.45  |
| -  | 13 | 4   | 1     | -0.40 |
| -  | 13 | -4  | 1     | -0.06 |
| 13 | -4 | -1  | -0.01 | 0.35  |
| -  | 13 | 4   | 0     | 0.18  |
| 13 | 4  | 0   | 0.03  | 0.44  |
| 13 | -4 | 0   | 0.46  | 0.38  |
| -  | 13 | -4  | 0     | 0.40  |
| -  | 13 | 4   | -1    | -0.48 |
| 13 | 4  | 1   | -0.06 | 0.40  |
| -  | 13 | -4  | -1    | -0.10 |
| 13 | -4 | 1   | 0.46  | 0.38  |
| -  | 13 | 4   | -2    | -0.07 |
| 13 | 4  | 2   | -0.46 | 0.39  |
| 13 | -4 | 2   | 0.28  | 0.40  |
| -  | 13 | -4  | -2    | 0.00  |
| 13 | 4  | 3   | 0.52  | 0.44  |
| -  | 13 | 4   | -3    | 0.14  |
| 13 | -4 | 3   | 0.97  | 0.42  |
| -  | 13 | -4  | -3    | 0.29  |
| -  | 13 | 4   | -4    | -0.05 |
| 13 | 4  | 4   | 0.46  | 0.44  |
| 13 | -4 | 4   | 0.85  | 0.44  |
| -  | 13 | -4  | -4    | 0.44  |
| 13 | 4  | 5   | 0.43  | 0.45  |
| -  | 13 | 4   | -5    | -0.14 |
| -  | 13 | -4  | -5    | 0.06  |
| 13 | -4 | 5   | 0.69  | 0.46  |
| 13 | 5  | -12 | -0.38 | 0.48  |

|    |    |     |       |            |
|----|----|-----|-------|------------|
| 13 | 5  | -11 | -0.58 | 0.45       |
| 13 | -5 | -11 | -0.27 | 0.42       |
| 13 | 5  | -10 | 0.25  | 0.45       |
| 13 | -5 | -10 | -0.62 | 0.38       |
| 13 | 5  | -9  | 0.06  | 0.45       |
| 13 | -5 | -9  | 0.40  | 0.38       |
| 13 | 5  | -8  | -0.15 | 0.44       |
| 13 | -5 | -8  | -0.01 | 0.35       |
| -  | 13 | 5   | 7     | 3.70 0.44  |
| 13 | 5  | -7  | 3.56  | 0.52       |
| 13 | -5 | -7  | 4.46  | 0.39       |
| 13 | 5  | -6  | 2.11  | 0.49       |
| -  | 13 | 5   | 6     | 2.39 0.32  |
| 13 | -5 | -6  | 3.37  | 0.36       |
| 13 | 5  | -5  | 0.81  | 0.47       |
| -  | 13 | 5   | 5     | 1.00 0.31  |
| -  | 13 | -5  | 5     | 1.44 0.28  |
| 13 | -5 | -5  | 1.62  | 0.30       |
| -  | 13 | 5   | 4     | -0.22 0.30 |
| 13 | -5 | -4  | 0.09  | 0.29       |
| -  | 13 | -5  | 4     | 0.20 0.28  |
| 13 | -5 | -4  | 0.11  | 0.34       |
| 13 | 5  | -3  | -0.94 | 0.46       |
| -  | 13 | 5   | 3     | 0.20 0.31  |
| 13 | -5 | -3  | 0.60  | 0.34       |
| -  | 13 | -5  | 3     | 0.49 0.29  |
| 13 | -5 | -3  | 0.67  | 0.28       |
| 13 | 5  | -2  | 0.89  | 0.48       |
| -  | 13 | 5   | 2     | 1.26 0.34  |
| -  | 13 | -5  | 2     | 1.34 0.30  |
| 13 | -5 | -2  | 2.21  | 0.38       |
| -  | 13 | 5   | 1     | -0.11 0.33 |
| 13 | 5  | -1  | -1.05 | 0.46       |
| 13 | -5 | -1  | -0.15 | 0.36       |
| -  | 13 | -5  | 1     | 0.08 0.29  |
| -  | 13 | 5   | 0     | 0.10 0.32  |
| 13 | 5  | 0   | 0.23  | 0.42       |
| -  | 13 | -5  | 0     | 0.60 0.31  |
| 13 | -5 | 0   | 1.03  | 0.38       |
| 13 | 5  | 1   | -0.43 | 0.44       |
| -  | 13 | 5   | -1    | -0.35 0.36 |
| 13 | -5 | 1   | 0.24  | 0.38       |
| -  | 13 | -5  | -1    | -0.23 0.32 |
| 13 | 5  | 2   | 0.79  | 0.47       |
| -  | 13 | 5   | -2    | 0.85 0.38  |
| -  | 13 | -5  | -2    | 1.26 0.35  |
| 13 | -5 | 2   | 1.73  | 0.41       |
| 13 | 5  | 3   | 0.95  | 0.46       |
| -  | 13 | 5   | -3    | 0.47 0.40  |
| 13 | -5 | 3   | 1.12  | 0.42       |
| -  | 13 | -5  | -3    | 1.61 0.37  |
| -  | 13 | 5   | -4    | -0.10 0.41 |
| 13 | 5  | 4   | 0.06  | 0.45       |
| 13 | -5 | 4   | 0.64  | 0.44       |

|   |    |    |     |       |      |
|---|----|----|-----|-------|------|
| - | 13 | -5 | -4  | 0.10  | 0.34 |
| - | 13 | 5  | -5  | 0.11  | 0.44 |
|   | 13 | 5  | 5   | -0.06 | 0.44 |
| - | 13 | -5 | -5  | 0.12  | 0.36 |
|   | 13 | 6  | -11 | 2.79  | 0.55 |
|   | 13 | -6 | -11 | 2.66  | 0.42 |
|   | 13 | 6  | -10 | 0.00  | 0.46 |
|   | 13 | -6 | -10 | -0.11 | 0.40 |
|   | 13 | 6  | -9  | 1.43  | 0.50 |
|   | 13 | -6 | -9  | 2.29  | 0.39 |
|   | 13 | 6  | -8  | 0.30  | 0.42 |
|   | 13 | -6 | -8  | 0.72  | 0.35 |
|   | 13 | 6  | -7  | -0.18 | 0.47 |
| - | 13 | 6  | 7   | -0.19 | 0.29 |
|   | 13 | -6 | -7  | 0.08  | 0.32 |
| - | 13 | 6  | 6   | -0.02 | 0.30 |
|   | 13 | 6  | -6  | -0.74 | 0.46 |
|   | 13 | -6 | -6  | 0.46  | 0.32 |
|   | 13 | 6  | -5  | 0.15  | 0.49 |
| - | 13 | 6  | 5   | 0.87  | 0.28 |
|   | 13 | -6 | -5  | 1.49  | 0.32 |
|   | 13 | 6  | -4  | -1.17 | 0.43 |
| - | 13 | 6  | 4   | -0.38 | 0.30 |
|   | 13 | -6 | -4  | 0.11  | 0.27 |
| - | 13 | -6 | 4   | 0.40  | 0.28 |
|   | 13 | 6  | -3  | -0.32 | 0.45 |
| - | 13 | 6  | 3   | -0.03 | 0.29 |
| - | 13 | -6 | 3   | 0.42  | 0.29 |
|   | 13 | -6 | -3  | 0.42  | 0.33 |
|   | 13 | -6 | -3  | 0.35  | 0.26 |
| - | 13 | 6  | 2   | 0.35  | 0.31 |
|   | 13 | 6  | -2  | -0.37 | 0.48 |
|   | 13 | -6 | -2  | 0.76  | 0.34 |
|   | 13 | -6 | -2  | 0.70  | 0.26 |
| - | 13 | -6 | 2   | 0.63  | 0.29 |
| - | 13 | 6  | 1   | -0.53 | 0.31 |
|   | 13 | 6  | -1  | -0.73 | 0.46 |
|   | 13 | -6 | -1  | 0.21  | 0.35 |
| - | 13 | -6 | 1   | 0.13  | 0.30 |
|   | 13 | -6 | -1  | 0.07  | 0.24 |
|   | 13 | 6  | 0   | -0.86 | 0.47 |
| - | 13 | 6  | 0   | -0.48 | 0.32 |
|   | 13 | -6 | 0   | 0.61  | 0.36 |
| - | 13 | -6 | 0   | -0.03 | 0.29 |
|   | 13 | 6  | 1   | -0.58 | 0.42 |
| - | 13 | 6  | -1  | -0.41 | 0.37 |
|   | 13 | -6 | 1   | 0.14  | 0.38 |
| - | 13 | -6 | -1  | 0.16  | 0.33 |
|   | 13 | 6  | 2   | -0.28 | 0.41 |
| - | 13 | 6  | -2  | -0.76 | 0.38 |
| - | 13 | -6 | -2  | 0.63  | 0.35 |
|   | 13 | -6 | 2   | 0.35  | 0.39 |
|   | 13 | 6  | 3   | -0.22 | 0.45 |
| - | 13 | 6  | -3  | -0.76 | 0.39 |

|    |    |     |       |       |      |
|----|----|-----|-------|-------|------|
| 13 | -6 | 3   | 0.38  | 0.41  |      |
| -  | 13 | -6  | -3    | 0.03  | 0.35 |
| -  | 13 | 6   | -4    | -0.35 | 0.41 |
| 13 | 6  | 4   | 0.03  | 0.46  |      |
| -  | 13 | -6  | -4    | 0.40  | 0.35 |
| 13 | -6 | 4   | 0.61  | 0.44  |      |
| -  | 13 | 6   | -5    | -0.62 | 0.43 |
| 13 | 7  | -11 | -0.17 | 0.50  |      |
| 13 | -7 | -11 | 0.01  | 0.38  |      |
| 13 | 7  | -10 | -0.19 | 0.48  |      |
| 13 | -7 | -10 | -0.79 | 0.40  |      |
| 13 | 7  | -9  | -0.41 | 0.48  |      |
| 13 | -7 | -9  | -0.38 | 0.37  |      |
| -  | 13 | 7   | 8     | -0.39 | 0.30 |
| 13 | 7  | -8  | -0.46 | 0.48  |      |
| 13 | -7 | -8  | -0.09 | 0.34  |      |
| 13 | 7  | -7  | -0.72 | 0.49  |      |
| -  | 13 | 7   | 7     | -0.28 | 0.30 |
| 13 | -7 | -7  | -0.01 | 0.32  |      |
| -  | 13 | 7   | 6     | 1.14  | 0.32 |
| 13 | 7  | -6  | 0.89  | 0.51  |      |
| 13 | -7 | -6  | 1.91  | 0.33  |      |
| -  | 13 | 7   | 5     | 0.54  | 0.32 |
| 13 | 7  | -5  | -0.04 | 0.46  |      |
| 13 | -7 | -5  | 1.17  | 0.31  |      |
| -  | 13 | 7   | 4     | -0.42 | 0.31 |
| 13 | 7  | -4  | -1.32 | 0.48  |      |
| -  | 13 | -7  | 4     | 0.10  | 0.29 |
| 13 | -7 | -4  | 0.09  | 0.28  |      |
| 13 | 7  | -3  | -1.20 | 0.44  |      |
| -  | 13 | 7   | 3     | -0.36 | 0.32 |
| -  | 13 | -7  | 3     | 0.01  | 0.28 |
| 13 | -7 | -3  | 0.25  | 0.27  |      |
| -  | 13 | 7   | 2     | -0.44 | 0.31 |
| -  | 13 | -7  | 2     | 0.17  | 0.29 |
| 13 | -7 | -2  | 0.28  | 0.27  |      |
| 13 | -7 | -2  | 0.50  | 0.33  |      |
| -  | 13 | 7   | 1     | 0.34  | 0.33 |
| 13 | 7  | -1  | -0.37 | 0.48  |      |
| 13 | -7 | -1  | 0.96  | 0.28  |      |
| 13 | -7 | -1  | 0.88  | 0.36  |      |
| -  | 13 | -7  | 1     | 0.74  | 0.28 |
| 13 | 7  | 0   | 0.31  | 0.44  |      |
| -  | 13 | 7   | 0     | 0.65  | 0.37 |
| -  | 13 | -7  | 0     | 1.45  | 0.33 |
| 13 | -7 | 0   | 1.35  | 0.37  |      |
| 13 | -7 | 0   | 1.09  | 0.27  |      |
| -  | 13 | 7   | -1    | -0.39 | 0.37 |
| 13 | -7 | 1   | 0.14  | 0.38  |      |
| -  | 13 | -7  | -1    | 0.09  | 0.33 |
| -  | 13 | 7   | -2    | -0.43 | 0.39 |
| 13 | 7  | 2   | -0.55 | 0.46  |      |
| 13 | -7 | 2   | 0.35  | 0.39  |      |
| -  | 13 | -7  | -2    | 0.41  | 0.34 |

|    |    |     |       |       |      |
|----|----|-----|-------|-------|------|
| 13 | 7  | 3   | -0.35 | 0.46  |      |
| -  | 13 | 7   | -3    | -0.06 | 0.42 |
| -  | 13 | -7  | -3    | 0.32  | 0.36 |
| 13 | -7 | 3   | 0.26  | 0.42  |      |
| 13 | 7  | 4   | -0.04 | 0.46  |      |
| -  | 13 | 7   | -4    | 0.20  | 0.40 |
| -  | 13 | -7  | -4    | 0.81  | 0.38 |
| 13 | -7 | 4   | 0.66  | 0.45  |      |
| 13 | 8  | -10 | 0.37  | 0.52  |      |
| 13 | -8 | -10 | 0.49  | 0.37  |      |
| 13 | 8  | -9  | 0.08  | 0.50  |      |
| 13 | -8 | -9  | 0.06  | 0.38  |      |
| -  | 13 | 8   | 8     | -0.35 | 0.32 |
| 13 | 8  | -8  | -0.30 | 0.46  |      |
| 13 | -8 | -8  | 0.01  | 0.35  |      |
| -  | 13 | 8   | 7     | 0.04  | 0.31 |
| 13 | 8  | -7  | -0.54 | 0.50  |      |
| 13 | -8 | -7  | 0.17  | 0.34  |      |
| 13 | 8  | -6  | -0.69 | 0.51  |      |
| -  | 13 | 8   | 6     | -0.13 | 0.32 |
| 13 | -8 | -6  | 0.02  | 0.32  |      |
| 13 | 8  | -5  | -0.26 | 0.52  |      |
| -  | 13 | 8   | 5     | 0.55  | 0.32 |
| 13 | -8 | -5  | 1.28  | 0.31  |      |
| -  | 13 | 8   | 4     | -0.19 | 0.32 |
| 13 | 8  | -4  | -1.31 | 0.51  |      |
| 13 | -8 | -4  | 0.22  | 0.28  |      |
| -  | 13 | -8  | 4     | 0.16  | 0.27 |
| 13 | 8  | -3  | 0.91  | 0.55  |      |
| -  | 13 | 8   | 3     | 2.10  | 0.37 |
| 13 | -8 | -3  | 2.80  | 0.31  |      |
| -  | 13 | -8  | 3     | 3.06  | 0.32 |
| -  | 13 | 8   | 2     | 0.67  | 0.35 |
| 13 | 8  | -2  | -0.82 | 0.51  |      |
| 13 | -8 | -2  | 1.15  | 0.27  |      |
| -  | 13 | -8  | 2     | 1.52  | 0.31 |
| 13 | 8  | -1  | -0.87 | 0.50  |      |
| -  | 13 | 8   | 1     | 0.15  | 0.33 |
| 13 | -8 | -1  | 0.53  | 0.26  |      |
| -  | 13 | -8  | 1     | 0.73  | 0.31 |
| 13 | -8 | -1  | 1.04  | 0.36  |      |
| -  | 13 | 8   | 0     | -0.53 | 0.37 |
| 13 | -8 | 0   | -0.03 | 0.38  |      |
| 13 | -8 | 0   | -0.02 | 0.26  |      |
| -  | 13 | -8  | 0     | 0.30  | 0.29 |
| -  | 13 | 8   | -1    | -0.16 | 0.39 |
| 13 | 8  | 1   | -0.17 | 0.48  |      |
| -  | 13 | -8  | -1    | 1.09  | 0.34 |
| 13 | -8 | 1   | 1.27  | 0.40  |      |
| 13 | -8 | 1   | 0.79  | 0.27  |      |
| 13 | 8  | 2   | -1.03 | 0.48  |      |
| -  | 13 | 8   | -2    | -0.77 | 0.40 |
| 13 | -8 | 2   | 0.14  | 0.27  |      |
| 13 | -8 | 2   | 0.41  | 0.39  |      |

|   |    |    |     |       |      |
|---|----|----|-----|-------|------|
| - | 13 | -8 | -2  | 0.35  | 0.32 |
|   | 13 | 8  | 3   | -0.47 | 0.48 |
| - | 13 | 8  | -3  | -0.51 | 0.42 |
| - | 13 | -8 | -3  | 0.58  | 0.37 |
|   | 13 | -8 | 3   | 0.40  | 0.42 |
| - | 13 | 8  | -4  | -0.39 | 0.39 |
|   | 13 | 8  | 4   | -0.54 | 0.46 |
|   | 13 | -8 | 4   | 0.81  | 0.46 |
|   | 13 | -9 | -10 | -0.50 | 0.40 |
|   | 13 | 9  | -9  | -0.52 | 0.52 |
|   | 13 | -9 | -9  | -0.12 | 0.38 |
|   | 13 | 9  | -8  | 0.27  | 0.55 |
| - | 13 | 9  | 8   | 0.90  | 0.32 |
|   | 13 | -9 | -8  | 1.50  | 0.38 |
|   | 13 | 9  | -7  | -0.28 | 0.53 |
| - | 13 | 9  | 7   | -0.33 | 0.32 |
|   | 13 | -9 | -7  | 0.35  | 0.35 |
|   | 13 | 9  | -6  | 0.93  | 0.56 |
| - | 13 | 9  | 6   | 1.48  | 0.34 |
|   | 13 | -9 | -6  | 1.84  | 0.34 |
| - | 13 | 9  | 5   | 0.26  | 0.33 |
|   | 13 | 9  | -5  | -0.97 | 0.53 |
|   | 13 | -9 | -5  | 0.69  | 0.32 |
| - | 13 | 9  | 4   | -0.04 | 0.33 |
|   | 13 | -9 | -4  | 0.87  | 0.31 |
| - | 13 | -9 | 4   | 0.78  | 0.28 |
| - | 13 | 9  | 3   | -0.62 | 0.31 |
|   | 13 | -9 | -3  | 0.24  | 0.29 |
| - | 13 | -9 | 3   | 0.23  | 0.29 |
|   | 13 | 9  | -2  | -1.15 | 0.53 |
| - | 13 | 9  | 2   | -0.48 | 0.35 |
|   | 13 | -9 | -2  | 0.17  | 0.27 |
| - | 13 | -9 | 2   | 0.24  | 0.30 |
| - | 13 | 9  | 1   | 0.38  | 0.37 |
|   | 13 | 9  | -1  | -0.92 | 0.52 |
|   | 13 | -9 | -1  | 0.90  | 0.28 |
| - | 13 | -9 | 1   | 1.28  | 0.33 |
| - | 13 | 9  | 0   | -0.40 | 0.37 |
|   | 13 | -9 | 0   | 0.17  | 0.36 |
|   | 13 | -9 | 0   | 0.12  | 0.27 |
| - | 13 | -9 | 0   | 0.17  | 0.33 |
| - | 13 | 9  | -1  | -0.40 | 0.38 |
|   | 13 | -9 | 1   | 0.02  | 0.27 |
| - | 13 | -9 | -1  | 0.05  | 0.34 |
|   | 13 | -9 | 1   | 0.21  | 0.37 |
| - | 13 | 9  | -2  | -0.25 | 0.41 |
|   | 13 | 9  | 2   | -0.94 | 0.47 |
|   | 13 | -9 | 2   | -0.12 | 0.28 |
| - | 13 | -9 | -2  | 0.40  | 0.36 |
|   | 13 | -9 | 2   | 0.46  | 0.40 |
| - | 13 | 9  | -3  | -0.06 | 0.43 |
|   | 13 | 9  | 3   | -0.65 | 0.48 |
| - | 13 | -9 | -3  | 0.74  | 0.35 |
|   | 13 | -9 | 3   | 0.43  | 0.30 |

|    |     |     |       |       |      |
|----|-----|-----|-------|-------|------|
| 13 | -9  | 3   | 0.92  | 0.44  |      |
| 13 | 10  | -9  | 0.07  | 0.56  |      |
| 13 | -10 | -9  | 0.46  | 0.39  |      |
| 13 | 10  | -8  | -0.95 | 0.55  |      |
| -  | 13  | 10  | 8     | -0.20 | 0.33 |
| 13 | -10 | -8  | -0.11 | 0.37  |      |
| 13 | 10  | -7  | 0.58  | 0.58  |      |
| -  | 13  | 10  | 7     | 0.85  | 0.34 |
| 13 | -10 | -7  | 1.46  | 0.34  |      |
| 13 | 10  | -6  | -0.18 | 0.56  |      |
| -  | 13  | 10  | 6     | 0.12  | 0.34 |
| 13 | -10 | -6  | 0.91  | 0.33  |      |
| -  | 13  | 10  | 5     | -0.72 | 0.33 |
| 13 | 10  | -5  | -1.22 | 0.50  |      |
| 13 | -10 | -5  | -0.19 | 0.32  |      |
| -  | 13  | 10  | 4     | -0.28 | 0.35 |
| 13 | 10  | -4  | -1.42 | 0.54  |      |
| 13 | -10 | -4  | 0.17  | 0.31  |      |
| 13 | 10  | -3  | -1.04 | 0.55  |      |
| -  | 13  | 10  | 3     | 0.26  | 0.36 |
| 13 | -10 | -3  | 1.04  | 0.28  |      |
| -  | 13  | -10 | 3     | 1.28  | 0.30 |
| -  | 13  | 10  | 2     | -0.40 | 0.36 |
| 13 | -10 | -2  | 0.14  | 0.29  |      |
| -  | 13  | -10 | 2     | 0.24  | 0.31 |
| -  | 13  | 10  | 1     | -0.58 | 0.37 |
| 13 | -10 | -1  | -0.02 | 0.28  |      |
| -  | 13  | -10 | 1     | 0.25  | 0.32 |
| -  | 13  | 10  | 0     | -1.02 | 0.38 |
| -  | 13  | -10 | 0     | 0.50  | 0.34 |
| 13 | -10 | 0   | -0.05 | 0.28  |      |
| -  | 13  | 10  | -1    | -0.51 | 0.39 |
| 13 | -10 | 1   | 0.47  | 0.37  |      |
| 13 | -10 | 1   | 0.08  | 0.28  |      |
| -  | 13  | -10 | -1    | 0.34  | 0.33 |
| 13 | 10  | 2   | -0.66 | 0.48  |      |
| -  | 13  | 10  | -2    | -0.55 | 0.41 |
| 13 | -10 | 2   | 0.49  | 0.39  |      |
| 13 | -10 | 2   | -0.17 | 0.29  |      |
| -  | 13  | -10 | -2    | 0.15  | 0.38 |
| 13 | 10  | 3   | -0.79 | 0.47  |      |
| -  | 13  | 10  | -3    | -0.64 | 0.43 |
| 13 | -10 | 3   | 0.26  | 0.31  |      |
| 13 | -10 | 3   | 0.84  | 0.43  |      |
| 13 | -10 | 4   | -0.09 | 0.32  |      |
| 13 | 11  | -8  | -0.52 | 0.58  |      |
| -  | 13  | 11  | 8     | 0.02  | 0.36 |
| 13 | -11 | -8  | 0.63  | 0.38  |      |
| -  | 13  | 11  | 7     | 0.21  | 0.34 |
| 13 | 11  | -7  | -0.49 | 0.59  |      |
| 13 | -11 | -7  | 0.12  | 0.37  |      |
| 13 | 11  | -6  | -0.74 | 0.57  |      |
| -  | 13  | 11  | 6     | 0.30  | 0.35 |
| 13 | -11 | -6  | 0.49  | 0.34  |      |

|    |     |     |       |       |
|----|-----|-----|-------|-------|
| 13 | 11  | -5  | -1.35 | 0.57  |
| -  | 13  | 11  | 5     | -0.32 |
| 13 | -11 | -5  | -0.01 | 0.33  |
| -  | 13  | 11  | 4     | -0.26 |
| 13 | -11 | -4  | -0.24 | 0.29  |
| -  | 13  | 11  | 3     | -0.81 |
| 13 | -11 | -3  | 0.22  | 0.31  |
| -  | 13  | -11 | 3     | 0.40  |
| -  | 13  | 11  | 2     | -0.18 |
| 13 | 11  | -2  | -1.23 | 0.56  |
| -  | 13  | -11 | 2     | 0.57  |
| 13 | -11 | -2  | 0.70  | 0.31  |
| -  | 13  | 11  | 1     | -0.55 |
| -  | 13  | -11 | 1     | 0.09  |
| 13 | -11 | -1  | 0.36  | 0.30  |
| -  | 13  | 11  | 0     | -0.83 |
| -  | 13  | -11 | 0     | 0.25  |
| 13 | -11 | 0   | -0.04 | 0.30  |
| -  | 13  | 11  | -1    | -0.47 |
| 13 | -11 | 1   | -0.31 | 0.30  |
| -  | 13  | -11 | -1    | 0.69  |
| 13 | 11  | 2   | -1.19 | 0.48  |
| -  | 13  | 11  | -2    | -0.63 |
| -  | 13  | -11 | -2    | 0.60  |
| 13 | -11 | 2   | -0.10 | 0.31  |
| 13 | -11 | 2   | 0.35  | 0.39  |
| 13 | -11 | 3   | 0.51  | 0.44  |
| 13 | -11 | 3   | -0.34 | 0.32  |
| -  | 13  | 12  | 8     | -0.18 |
| -  | 13  | 12  | 7     | -0.27 |
| 13 | -12 | -7  | 0.25  | 0.37  |
| -  | 13  | 12  | 6     | 0.19  |
| 13 | 12  | -6  | -0.84 | 0.60  |
| 13 | -12 | -6  | -0.06 | 0.35  |
| -  | 13  | 12  | 5     | -0.21 |
| 13 | 12  | -5  | -1.39 | 0.59  |
| 13 | -12 | -5  | -0.25 | 0.31  |
| 13 | 12  | -4  | -1.06 | 0.54  |
| -  | 13  | 12  | 4     | -0.10 |
| 13 | -12 | -4  | 0.24  | 0.33  |
| -  | 13  | 12  | 3     | 0.40  |
| 13 | 12  | -3  | -0.89 | 0.59  |
| 13 | -12 | -3  | 0.83  | 0.33  |
| -  | 13  | 12  | 2     | 0.48  |
| 13 | 12  | -2  | -0.98 | 0.58  |
| -  | 13  | -12 | 2     | 1.52  |
| 13 | -12 | -2  | 1.14  | 0.32  |
| -  | 13  | 12  | 1     | -0.90 |
| 13 | -12 | -1  | 0.19  | 0.31  |
| -  | 13  | -12 | 1     | 0.32  |
| -  | 13  | 12  | 0     | -0.64 |
| 13 | -12 | 0   | 0.55  | 0.32  |
| -  | 13  | -12 | 0     | 1.05  |
| -  | 13  | 12  | -1    | -1.27 |

|   |    |     |    |       |      |
|---|----|-----|----|-------|------|
| - | 13 | -12 | -1 | 0.43  | 0.39 |
|   | 13 | -12 | 1  | 0.22  | 0.32 |
|   | 13 | -12 | 2  | 0.47  | 0.33 |
| - | 13 | 13  | 7  | 0.12  | 0.37 |
| - | 13 | 13  | 6  | 0.61  | 0.34 |
|   | 13 | -13 | -6 | 0.40  | 0.36 |
| - | 13 | 13  | 5  | -0.39 | 0.37 |
|   | 13 | 13  | -5 | -1.34 | 0.61 |
|   | 13 | -13 | -5 | -0.06 | 0.35 |
| - | 13 | 13  | 4  | -0.44 | 0.38 |
|   | 13 | -13 | -4 | 0.30  | 0.34 |
|   | 13 | 13  | -3 | -1.27 | 0.53 |
| - | 13 | 13  | 3  | -0.52 | 0.39 |
|   | 13 | -13 | -3 | 0.09  | 0.33 |
| - | 13 | 13  | 2  | -0.28 | 0.40 |
|   | 13 | -13 | -2 | 0.29  | 0.32 |
| - | 13 | -13 | 2  | 0.91  | 0.34 |
| - | 13 | 13  | 1  | -0.29 | 0.42 |
| - | 13 | -13 | 1  | 1.00  | 0.37 |
|   | 13 | -13 | -1 | 0.32  | 0.29 |
|   | 13 | -13 | 0  | 0.13  | 0.32 |
| - | 13 | -13 | 0  | 0.34  | 0.37 |
| - | 13 | -14 | 2  | 0.53  | 0.37 |
| - | 13 | -14 | 1  | 0.97  | 0.38 |
|   | 14 | 0   | -8 | 0.55  | 0.43 |
|   | 14 | 0   | -7 | -0.80 | 0.42 |
|   | 14 | 0   | -6 | -0.66 | 0.40 |
| - | 14 | 0   | 6  | -0.16 | 0.31 |
| - | 14 | 0   | 5  | -0.30 | 0.29 |
|   | 14 | 0   | -5 | -0.41 | 0.41 |
|   | 14 | 0   | -4 | 0.80  | 0.43 |
| - | 14 | 0   | 4  | 1.71  | 0.34 |
|   | 14 | 0   | -3 | -0.27 | 0.43 |
| - | 14 | 0   | 3  | -0.06 | 0.31 |
|   | 14 | 0   | -2 | 0.83  | 0.41 |
| - | 14 | 0   | 2  | 1.28  | 0.36 |
|   | 14 | 0   | -1 | 0.02  | 0.44 |
| - | 14 | 0   | 1  | -0.15 | 0.34 |
| - | 14 | 0   | 0  | 0.97  | 0.34 |
|   | 14 | 0   | 0  | 1.14  | 0.47 |
|   | 14 | 0   | 1  | 0.09  | 0.40 |
| - | 14 | 0   | -1 | 0.06  | 0.34 |
|   | 14 | 0   | 2  | 0.42  | 0.45 |
| - | 14 | 0   | -2 | 0.33  | 0.38 |
|   | 14 | 0   | 3  | 0.55  | 0.47 |
| - | 14 | 0   | -3 | -0.02 | 0.36 |
|   | 14 | 1   | -9 | -0.42 | 0.40 |
|   | 14 | 1   | -8 | -0.26 | 0.42 |
|   | 14 | 1   | -7 | 0.93  | 0.43 |
|   | 14 | -1  | -7 | 1.01  | 0.40 |
| - | 14 | 1   | 6  | -0.31 | 0.31 |
|   | 14 | 1   | -6 | -1.09 | 0.41 |
|   | 14 | -1  | -6 | -0.73 | 0.38 |
| - | 14 | -1  | 6  | -0.23 | 0.28 |

|   |    |    |    |       |      |
|---|----|----|----|-------|------|
| - | 14 | 1  | 5  | -0.18 | 0.31 |
|   | 14 | 1  | -5 | -0.70 | 0.43 |
|   | 14 | -1 | -5 | -0.66 | 0.39 |
| - | 14 | -1 | 5  | -0.30 | 0.32 |
| - | 14 | 1  | 4  | 0.90  | 0.32 |
|   | 14 | 1  | -4 | 0.94  | 0.45 |
| - | 14 | -1 | 4  | 0.82  | 0.32 |
|   | 14 | -1 | -4 | 0.60  | 0.40 |
|   | 14 | 1  | -3 | -0.03 | 0.44 |
| - | 14 | 1  | 3  | 0.55  | 0.34 |
| - | 14 | -1 | 3  | 0.11  | 0.33 |
|   | 14 | -1 | -3 | 0.46  | 0.42 |
| - | 14 | 1  | 2  | -0.20 | 0.33 |
|   | 14 | 1  | -2 | 0.19  | 0.45 |
| - | 14 | -1 | 2  | -0.21 | 0.33 |
|   | 14 | -1 | -2 | 0.10  | 0.38 |
| - | 14 | 1  | 1  | 0.08  | 0.35 |
|   | 14 | 1  | -1 | -0.20 | 0.44 |
|   | 14 | -1 | -1 | 0.32  | 0.43 |
| - | 14 | -1 | 1  | -0.27 | 0.34 |
| - | 14 | 1  | 0  | 0.13  | 0.36 |
|   | 14 | 1  | 0  | 0.44  | 0.46 |
| - | 14 | -1 | 0  | 0.21  | 0.32 |
|   | 14 | -1 | 0  | 0.21  | 0.44 |
|   | 14 | 1  | 1  | -0.25 | 0.46 |
| - | 14 | 1  | -1 | -0.03 | 0.37 |
| - | 14 | -1 | -1 | -0.01 | 0.34 |
|   | 14 | -1 | 1  | 0.40  | 0.43 |
|   | 14 | 1  | 2  | 0.31  | 0.45 |
| - | 14 | 1  | -2 | -0.39 | 0.38 |
| - | 14 | -1 | -2 | 0.42  | 0.38 |
|   | 14 | -1 | 2  | 0.54  | 0.45 |
|   | 14 | 1  | 3  | 0.00  | 0.46 |
| - | 14 | 1  | -3 | -0.25 | 0.39 |
|   | 14 | -1 | 3  | -0.07 | 0.46 |
| - | 14 | -1 | -3 | -0.13 | 0.39 |
|   | 14 | 2  | -9 | -0.04 | 0.42 |
|   | 14 | 2  | -8 | -0.11 | 0.45 |
|   | 14 | 2  | -7 | 0.49  | 0.44 |
|   | 14 | 2  | -6 | 0.10  | 0.45 |
| - | 14 | 2  | 6  | 0.94  | 0.31 |
|   | 14 | -2 | -6 | 0.66  | 0.39 |
| - | 14 | 2  | 5  | -0.68 | 0.30 |
|   | 14 | -2 | -5 | -0.44 | 0.37 |
| - | 14 | -2 | 5  | 0.00  | 0.29 |
|   | 14 | 2  | -4 | 1.03  | 0.46 |
| - | 14 | 2  | 4  | 1.40  | 0.34 |
|   | 14 | -2 | -4 | 1.37  | 0.41 |
| - | 14 | -2 | 4  | 1.81  | 0.33 |
| - | 14 | 2  | 3  | 1.01  | 0.34 |
|   | 14 | 2  | -3 | 0.64  | 0.42 |
|   | 14 | -2 | -3 | 1.02  | 0.42 |
| - | 14 | -2 | 3  | 0.89  | 0.33 |
|   | 14 | 2  | -2 | -0.56 | 0.47 |

|   |    |    |     |       |      |
|---|----|----|-----|-------|------|
| - | 14 | 2  | 2   | -0.38 | 0.34 |
|   | 14 | -2 | -2  | -0.08 | 0.41 |
| - | 14 | -2 | 2   | -0.04 | 0.32 |
| - | 14 | 2  | 1   | 0.30  | 0.36 |
|   | 14 | 2  | -1  | 0.08  | 0.47 |
| - | 14 | -2 | 1   | 0.52  | 0.35 |
|   | 14 | -2 | -1  | 0.53  | 0.43 |
| - | 14 | 2  | 0   | -0.05 | 0.37 |
|   | 14 | 2  | 0   | -0.30 | 0.46 |
| - | 14 | -2 | 0   | 0.54  | 0.33 |
|   | 14 | -2 | 0   | 0.67  | 0.42 |
|   | 14 | 2  | 1   | 0.02  | 0.42 |
| - | 14 | 2  | -1  | 0.27  | 0.39 |
| - | 14 | -2 | -1  | 0.34  | 0.36 |
|   | 14 | -2 | 1   | 0.56  | 0.44 |
|   | 14 | 2  | 2   | -0.09 | 0.46 |
| - | 14 | 2  | -2  | -0.07 | 0.37 |
| - | 14 | -2 | -2  | -0.05 | 0.35 |
|   | 14 | -2 | 2   | 0.48  | 0.45 |
|   | 14 | 2  | 3   | 0.05  | 0.46 |
| - | 14 | 2  | -3  | -0.26 | 0.41 |
|   | 14 | -2 | 3   | 0.89  | 0.45 |
| - | 14 | -2 | -3  | -0.27 | 0.40 |
|   | 14 | 3  | -10 | -0.24 | 0.44 |
|   | 14 | 3  | -9  | -0.72 | 0.46 |
|   | 14 | 3  | -8  | -0.28 | 0.44 |
| - | 14 | 3  | 7   | 1.71  | 0.32 |
|   | 14 | 3  | -7  | 1.72  | 0.47 |
|   | 14 | 3  | -6  | -1.22 | 0.45 |
| - | 14 | 3  | 6   | -0.47 | 0.30 |
| - | 14 | 3  | 5   | -0.26 | 0.31 |
|   | 14 | 3  | -5  | -0.81 | 0.45 |
| - | 14 | -3 | 5   | -0.10 | 0.30 |
|   | 14 | -3 | -5  | -0.22 | 0.36 |
| - | 14 | 3  | 4   | 0.02  | 0.33 |
|   | 14 | 3  | -4  | -0.78 | 0.47 |
|   | 14 | -3 | -4  | -0.29 | 0.38 |
| - | 14 | -3 | 4   | 0.03  | 0.30 |
|   | 14 | 3  | -3  | -0.60 | 0.47 |
| - | 14 | 3  | 3   | -0.13 | 0.33 |
|   | 14 | -3 | -3  | 0.20  | 0.38 |
| - | 14 | -3 | 3   | 0.16  | 0.32 |
| - | 14 | 3  | 2   | 0.54  | 0.35 |
|   | 14 | 3  | -2  | 0.53  | 0.48 |
|   | 14 | -3 | -2  | 0.77  | 0.41 |
| - | 14 | -3 | 2   | 0.78  | 0.34 |
|   | 14 | 3  | -1  | -0.17 | 0.48 |
| - | 14 | 3  | 1   | 0.10  | 0.33 |
|   | 14 | -3 | -1  | 0.23  | 0.41 |
| - | 14 | -3 | 1   | 0.47  | 0.34 |
| - | 14 | 3  | 0   | -0.28 | 0.34 |
|   | 14 | 3  | 0   | -0.32 | 0.43 |
|   | 14 | -3 | 0   | 0.25  | 0.41 |
| - | 14 | -3 | 0   | 0.10  | 0.36 |

|    |    |    |      |       |
|----|----|----|------|-------|
| 14 | 3  | 1  | 1.74 | 0.50  |
| -  | 14 | 3  | -1   | 1.33  |
|    | 14 | -3 | 1    | 1.43  |
| -  | 14 | -3 | -1   | 1.61  |
|    | 14 | 3  | 2    | 0.47  |
| -  | 14 | 3  | -2   | 0.88  |
| -  | 14 | -3 | -2   | 0.84  |
|    | 14 | -3 | 2    | 1.62  |
|    | 14 | 3  | 3    | -0.03 |
| -  | 14 | 3  | -3   | -0.08 |
| -  | 14 | -3 | -3   | 0.04  |
|    | 14 | -3 | 3    | 0.33  |
|    | 14 | 4  | -11  | -0.12 |
|    | 14 | 4  | -10  | -0.39 |
|    | 14 | 4  | -9   | -0.17 |
|    | 14 | 4  | -8   | -0.91 |
| -  | 14 | 4  | 7    | 0.14  |
|    | 14 | 4  | -7   | 0.11  |
| -  | 14 | 4  | 6    | -0.52 |
|    | 14 | 4  | -6   | -1.11 |
| -  | 14 | 4  | 5    | 0.09  |
|    | 14 | 4  | -5   | -0.88 |
| -  | 14 | -4 | 5    | 0.32  |
|    | 14 | -4 | -5   | -0.34 |
|    | 14 | 4  | -4   | -0.42 |
| -  | 14 | 4  | 4    | 0.22  |
|    | 14 | -4 | -4   | 0.25  |
| -  | 14 | -4 | 4    | 0.51  |
|    | 14 | 4  | -3   | -0.41 |
| -  | 14 | 4  | 3    | 0.43  |
|    | 14 | -4 | -3   | 0.71  |
| -  | 14 | -4 | 3    | 0.64  |
|    | 14 | 4  | -2   | -0.51 |
| -  | 14 | 4  | 2    | -0.09 |
|    | 14 | -4 | -2   | 0.82  |
| -  | 14 | -4 | 2    | 0.64  |
| -  | 14 | 4  | 1    | -0.41 |
|    | 14 | 4  | -1   | -0.66 |
|    | 14 | -4 | -1   | 0.39  |
| -  | 14 | -4 | 1    | 0.30  |
| -  | 14 | 4  | 0    | 0.33  |
|    | 14 | 4  | 0    | 0.19  |
| -  | 14 | -4 | 0    | 0.60  |
|    | 14 | -4 | 0    | 0.60  |
| -  | 14 | 4  | -1   | 0.33  |
|    | 14 | 4  | 1    | 0.38  |
|    | 14 | -4 | 1    | 0.79  |
| -  | 14 | -4 | -1   | 0.79  |
|    | 14 | 4  | 2    | -0.14 |
| -  | 14 | 4  | -2   | -0.17 |
|    | 14 | -4 | 2    | 0.39  |
| -  | 14 | -4 | -2   | 0.72  |
|    | 14 | 4  | 3    | -0.19 |
| -  | 14 | 4  | -3   | -0.14 |

|   |    |    |     |       |      |
|---|----|----|-----|-------|------|
| - | 14 | -4 | -3  | 0.54  | 0.39 |
|   | 14 | -4 | 3   | -0.04 | 0.45 |
|   | 14 | 5  | -11 | -0.38 | 0.52 |
|   | 14 | -5 | -11 | -1.19 | 0.45 |
|   | 14 | 5  | -10 | -0.49 | 0.47 |
|   | 14 | -5 | -10 | -0.58 | 0.42 |
|   | 14 | 5  | -9  | 0.77  | 0.51 |
|   | 14 | -5 | -9  | 1.13  | 0.40 |
|   | 14 | 5  | -8  | -0.54 | 0.47 |
|   | 14 | 5  | -7  | -0.58 | 0.49 |
| - | 14 | 5  | 7   | -0.08 | 0.31 |
|   | 14 | 5  | -6  | -1.32 | 0.48 |
| - | 14 | 5  | 6   | -0.63 | 0.31 |
| - | 14 | 5  | 5   | -0.64 | 0.32 |
|   | 14 | 5  | -4  | -1.11 | 0.46 |
| - | 14 | 5  | 4   | -0.35 | 0.34 |
| - | 14 | -5 | 4   | -0.03 | 0.31 |
|   | 14 | -5 | -4  | 0.40  | 0.36 |
|   | 14 | 5  | -3  | 0.68  | 0.52 |
| - | 14 | 5  | 3   | 1.09  | 0.36 |
| - | 14 | -5 | 3   | 2.07  | 0.34 |
|   | 14 | -5 | -3  | 1.84  | 0.41 |
|   | 14 | 5  | -2  | -0.71 | 0.50 |
| - | 14 | 5  | 2   | -0.08 | 0.36 |
|   | 14 | -5 | -2  | 0.37  | 0.38 |
| - | 14 | -5 | 2   | 0.39  | 0.30 |
| - | 14 | 5  | 1   | -0.28 | 0.34 |
|   | 14 | 5  | -1  | -0.60 | 0.49 |
|   | 14 | -5 | -1  | 0.73  | 0.39 |
| - | 14 | -5 | 1   | 0.23  | 0.33 |
|   | 14 | 5  | 0   | 0.08  | 0.46 |
| - | 14 | 5  | 0   | 0.13  | 0.35 |
| - | 14 | -5 | 0   | 0.42  | 0.34 |
|   | 14 | -5 | 0   | 0.84  | 0.42 |
| - | 14 | 5  | -1  | -0.46 | 0.35 |
|   | 14 | 5  | 1   | 0.20  | 0.50 |
| - | 14 | -5 | -1  | 0.40  | 0.35 |
|   | 14 | -5 | 1   | 0.65  | 0.42 |
|   | 14 | 5  | 2   | 1.52  | 0.50 |
| - | 14 | 5  | -2  | 1.02  | 0.42 |
|   | 14 | -5 | 2   | 2.29  | 0.46 |
| - | 14 | -5 | -2  | 1.56  | 0.36 |
| - | 14 | 5  | -3  | -0.16 | 0.43 |
|   | 14 | 5  | 3   | 0.08  | 0.48 |
| - | 14 | -5 | -3  | 0.62  | 0.39 |
|   | 14 | -5 | 3   | 0.64  | 0.46 |
|   | 14 | 6  | -10 | -0.38 | 0.50 |
|   | 14 | -6 | -10 | -0.59 | 0.41 |
|   | 14 | 6  | -9  | -0.37 | 0.51 |
|   | 14 | -6 | -9  | -0.05 | 0.38 |
|   | 14 | 6  | -8  | -0.34 | 0.50 |
|   | 14 | -6 | -8  | 0.71  | 0.37 |
| - | 14 | 6  | 7   | -0.37 | 0.32 |
|   | 14 | 6  | -7  | -0.92 | 0.51 |

|    |    |     |       |       |
|----|----|-----|-------|-------|
| 14 | -6 | -7  | 0.17  | 0.36  |
| 14 | 6  | -6  | -0.37 | 0.52  |
| -  | 14 | 6   | 6     | 0.37  |
| 14 | -6 | -6  | 1.19  | 0.36  |
| -  | 14 | 6   | 5     | 0.07  |
| 14 | 6  | -5  | -1.29 | 0.52  |
| -  | 14 | 6   | 4     | -0.39 |
| -  | 14 | -6  | 4     | 0.07  |
| -  | 14 | 6   | 3     | -0.15 |
| 14 | 6  | -3  | -0.82 | 0.48  |
| -  | 14 | -6  | 3     | 0.42  |
| 14 | -6 | -3  | 0.56  | 0.39  |
| 14 | 6  | -2  | 0.24  | 0.48  |
| -  | 14 | 6   | 2     | 0.48  |
| 14 | -6 | -2  | 1.06  | 0.38  |
| -  | 14 | -6  | 2     | 0.69  |
| -  | 14 | 6   | 1     | 0.45  |
| 14 | 6  | -1  | -0.42 | 0.51  |
| -  | 14 | -6  | 1     | 1.47  |
| 14 | -6 | -1  | 0.95  | 0.39  |
| -  | 14 | 6   | 0     | -0.40 |
| 14 | 6  | 0   | -0.82 | 0.45  |
| 14 | -6 | 0   | 0.55  | 0.41  |
| -  | 14 | -6  | 0     | 0.14  |
| 14 | 6  | 1   | -0.48 | 0.50  |
| -  | 14 | 6   | -1    | -0.51 |
| -  | 14 | -6  | -1    | -0.04 |
| 14 | -6 | 1   | 0.13  | 0.40  |
| -  | 14 | 6   | -2    | -0.36 |
| 14 | 6  | 2   | -0.58 | 0.49  |
| 14 | -6 | 2   | 0.16  | 0.43  |
| -  | 14 | -6  | -2    | 0.10  |
| -  | 14 | 6   | -3    | -0.76 |
| 14 | -6 | 3   | 0.31  | 0.46  |
| 14 | -7 | -10 | -0.07 | 0.42  |
| 14 | 7  | -9  | -0.58 | 0.53  |
| 14 | -7 | -9  | -0.28 | 0.39  |
| 14 | 7  | -8  | -0.30 | 0.53  |
| 14 | -7 | -8  | 0.40  | 0.37  |
| -  | 14 | 7   | 7     | -0.25 |
| 14 | 7  | -7  | -0.99 | 0.53  |
| 14 | -7 | -7  | 0.22  | 0.36  |
| 14 | 7  | -6  | -1.35 | 0.53  |
| -  | 14 | 7   | 6     | -0.65 |
| 14 | -7 | -6  | -0.13 | 0.33  |
| -  | 14 | 7   | 5     | -0.61 |
| 14 | -7 | -5  | -0.14 | 0.31  |
| -  | 14 | 7   | 4     | 0.42  |
| 14 | 7  | -4  | -0.05 | 0.51  |
| 14 | -7 | -4  | 1.24  | 0.31  |
| -  | 14 | -7  | 4     | 1.53  |
| -  | 14 | 7   | 3     | 1.62  |
| 14 | 7  | -3  | 0.56  | 0.57  |
| -  | 14 | -7  | 3     | 2.05  |

|   |    |    |    |       |      |
|---|----|----|----|-------|------|
| - | 14 | 7  | 2  | -0.17 | 0.37 |
| - | 14 | -7 | 2  | 0.19  | 0.32 |
|   | 14 | -7 | -2 | 0.29  | 0.37 |
| - | 14 | 7  | 1  | -0.24 | 0.38 |
| - | 14 | -7 | 1  | 0.42  | 0.34 |
|   | 14 | -7 | -1 | 0.40  | 0.38 |
|   | 14 | 7  | 0  | -0.58 | 0.50 |
| - | 14 | 7  | 0  | -0.16 | 0.40 |
|   | 14 | -7 | 0  | 0.38  | 0.40 |
| - | 14 | -7 | 0  | 0.37  | 0.36 |
|   | 14 | 7  | 1  | -0.99 | 0.50 |
| - | 14 | 7  | -1 | -0.20 | 0.38 |
|   | 14 | -7 | 1  | 0.38  | 0.40 |
| - | 14 | -7 | -1 | 0.46  | 0.34 |
| - | 14 | 7  | -2 | 0.17  | 0.44 |
|   | 14 | 7  | 2  | 0.45  | 0.52 |
| - | 14 | -7 | -2 | 1.01  | 0.40 |
|   | 14 | -7 | 2  | 1.02  | 0.44 |
|   | 14 | -8 | -9 | 1.09  | 0.41 |
|   | 14 | 8  | -8 | -0.76 | 0.56 |
| - | 14 | 8  | 8  | -0.05 | 0.36 |
|   | 14 | -8 | -8 | 0.32  | 0.36 |
| - | 14 | 8  | 7  | -0.19 | 0.34 |
|   | 14 | 8  | -7 | -0.60 | 0.51 |
|   | 14 | -8 | -7 | 0.02  | 0.35 |
|   | 14 | 8  | -6 | -1.23 | 0.56 |
| - | 14 | 8  | 6  | -0.31 | 0.35 |
|   | 14 | -8 | -6 | 0.40  | 0.34 |
| - | 14 | 8  | 5  | -0.48 | 0.34 |
|   | 14 | 8  | -5 | -1.23 | 0.51 |
|   | 14 | -8 | -5 | 0.13  | 0.31 |
|   | 14 | 8  | -4 | -1.46 | 0.57 |
| - | 14 | 8  | 4  | -0.42 | 0.36 |
| - | 14 | -8 | 4  | 0.50  | 0.31 |
|   | 14 | -8 | -4 | 0.43  | 0.31 |
| - | 14 | 8  | 3  | -0.69 | 0.37 |
| - | 14 | -8 | 3  | 0.64  | 0.32 |
|   | 14 | -8 | -3 | 0.28  | 0.29 |
| - | 14 | 8  | 2  | 1.43  | 0.40 |
|   | 14 | 8  | -2 | 0.33  | 0.57 |
|   | 14 | -8 | -2 | 1.97  | 0.31 |
| - | 14 | -8 | 2  | 2.12  | 0.35 |
| - | 14 | 8  | 1  | 1.82  | 0.42 |
|   | 14 | 8  | -1 | 1.26  | 0.56 |
|   | 14 | -8 | -1 | 2.47  | 0.43 |
| - | 14 | -8 | 1  | 2.49  | 0.37 |
| - | 14 | 8  | 0  | -0.15 | 0.37 |
|   | 14 | 8  | 0  | -1.02 | 0.52 |
| - | 14 | -8 | 0  | 0.32  | 0.35 |
|   | 14 | -8 | 0  | 0.66  | 0.39 |
|   | 14 | 8  | 1  | -1.06 | 0.50 |
| - | 14 | 8  | -1 | -0.36 | 0.42 |
|   | 14 | -8 | 1  | 0.48  | 0.41 |
| - | 14 | -8 | -1 | 0.65  | 0.38 |

|    |     |     |       |       |
|----|-----|-----|-------|-------|
| 14 | -8  | 2   | 0.67  | 0.43  |
| -  | 14  | 9   | 8     | -0.26 |
| 14 | 9   | -8  | -0.79 | 0.54  |
| 14 | -9  | -8  | 0.12  | 0.37  |
| -  | 14  | 9   | 7     | -0.19 |
| 14 | 9   | -7  | -1.32 | 0.57  |
| 14 | -9  | -7  | 0.05  | 0.36  |
| 14 | 9   | -6  | -1.40 | 0.58  |
| -  | 14  | 9   | 6     | 0.02  |
| 14 | -9  | -6  | 0.34  | 0.34  |
| 14 | 9   | -5  | -1.50 | 0.58  |
| -  | 14  | 9   | 5     | -0.68 |
| 14 | -9  | -5  | 0.34  | 0.33  |
| -  | 14  | 9   | 4     | -0.27 |
| 14 | -9  | -4  | 0.60  | 0.32  |
| 14 | 9   | -3  | -0.58 | 0.59  |
| -  | 14  | 9   | 3     | 0.94  |
| 14 | -9  | -3  | 1.56  | 0.32  |
| -  | 14  | -9  | 3     | 1.87  |
| -  | 14  | 9   | 2     | 0.24  |
| 14 | 9   | -2  | -0.65 | 0.58  |
| -  | 14  | -9  | 2     | 1.11  |
| 14 | -9  | -2  | 1.12  | 0.31  |
| -  | 14  | 9   | 1     | -0.35 |
| 14 | -9  | -1  | 0.18  | 0.29  |
| -  | 14  | -9  | 1     | 0.62  |
| 14 | 9   | 0   | -0.84 | 0.52  |
| -  | 14  | 9   | 0     | -0.73 |
| 14 | -9  | 0   | 0.56  | 0.41  |
| -  | 14  | -9  | 0     | 0.06  |
| -  | 14  | 9   | -1    | -0.67 |
| 14 | 9   | 1   | -1.24 | 0.51  |
| -  | 14  | -9  | -1    | 0.14  |
| 14 | -9  | 1   | 0.34  | 0.41  |
| 14 | -9  | 2   | 1.02  | 0.44  |
| -  | 14  | 10  | 8     | -0.13 |
| -  | 14  | 10  | 7     | -0.43 |
| 14 | -10 | -7  | 0.12  | 0.37  |
| 14 | 10  | -6  | -1.58 | 0.61  |
| -  | 14  | 10  | 6     | -0.23 |
| 14 | -10 | -6  | 0.31  | 0.35  |
| -  | 14  | 10  | 5     | 0.06  |
| 14 | -10 | -5  | 0.47  | 0.33  |
| -  | 14  | 10  | 4     | -0.29 |
| 14 | -10 | -4  | 0.79  | 0.33  |
| -  | 14  | 10  | 3     | -0.50 |
| 14 | -10 | -3  | 0.44  | 0.31  |
| -  | 14  | -10 | 3     | 0.16  |
| -  | 14  | 10  | 2     | -0.68 |
| -  | 14  | -10 | 2     | 0.08  |
| 14 | -10 | -2  | 0.10  | 0.30  |
| 14 | 10  | -1  | -1.28 | 0.51  |
| -  | 14  | 10  | 1     | -0.55 |
| -  | 14  | -10 | 1     | 0.31  |

|    |     |     |       |       |
|----|-----|-----|-------|-------|
| 14 | -10 | -1  | 0.11  | 0.30  |
| -  | 14  | 10  | 0     | -0.49 |
| 14 | 10  | 0   | -1.35 | 0.55  |
| -  | 14  | -10 | 0     | 0.38  |
| 14 | -10 | 0   | 0.09  | 0.29  |
| 14 | -10 | 1   | -0.07 | 0.30  |
| -  | 14  | 11  | 7     | 0.00  |
| -  | 14  | 11  | 6     | -0.29 |
| 14 | -11 | -6  | 0.11  | 0.35  |
| -  | 14  | 11  | 5     | -0.21 |
| 14 | -11 | -5  | 0.23  | 0.35  |
| -  | 14  | 11  | 4     | -0.36 |
| 14 | -11 | -4  | 0.28  | 0.33  |
| -  | 14  | 11  | 3     | -0.67 |
| 14 | -11 | -3  | 0.09  | 0.32  |
| -  | 14  | 11  | 2     | -1.02 |
| 14 | -11 | -2  | 0.32  | 0.32  |
| -  | 14  | -11 | 2     | 0.32  |
| 14 | -11 | -1  | 0.07  | 0.31  |
| -  | 14  | -11 | 1     | 0.50  |
| 14 | -11 | 0   | 0.70  | 0.32  |
| 14 | -12 | -4  | -0.06 | 0.34  |
| 14 | -12 | -3  | 0.06  | 0.33  |
| 14 | -12 | -2  | 0.35  | 0.33  |
| -  | 14  | -12 | 2     | 0.45  |
| -  | 14  | -12 | 1     | 1.35  |
| -  | 14  | -13 | 2     | 0.41  |
| 15 | 0   | -7  | -0.53 | 0.44  |
| 15 | 0   | -6  | -0.85 | 0.44  |
| -  | 15  | 0   | 5     | -0.26 |
| 15 | 0   | -5  | -0.73 | 0.45  |
| -  | 15  | 0   | 4     | -0.21 |
| 15 | 0   | -4  | -0.46 | 0.45  |
| 15 | 0   | -3  | -0.35 | 0.46  |
| -  | 15  | 0   | 3     | -0.29 |
| -  | 15  | 0   | 2     | 0.08  |
| 15 | 0   | -2  | -0.45 | 0.47  |
| -  | 15  | 0   | 1     | -0.12 |
| 15 | 0   | -1  | 0.20  | 0.48  |
| -  | 15  | 0   | 0     | -0.12 |
| 15 | 0   | 0   | 0.36  | 0.49  |
| 15 | 0   | 1   | 0.29  | 0.49  |
| -  | 15  | 0   | -1    | 0.14  |
| 15 | 1   | -8  | -0.53 | 0.44  |
| 15 | 1   | -7  | -0.61 | 0.45  |
| 15 | 1   | -6  | -0.37 | 0.46  |
| -  | 15  | 1   | 6     | -0.08 |
| 15 | -1  | -6  | -0.19 | 0.46  |
| -  | 15  | 1   | 5     | -0.13 |
| 15 | 1   | -5  | -0.92 | 0.46  |
| -  | 15  | -1  | 5     | -0.02 |
| 15 | -1  | -5  | -0.61 | 0.43  |
| -  | 15  | 1   | 4     | -0.23 |
| 15 | 1   | -4  | -0.56 | 0.46  |

|    |    |    |       |       |
|----|----|----|-------|-------|
| 15 | -1 | -4 | -0.30 | 0.43  |
| -  | 15 | -1 | 4     | 0.18  |
| 15 | 1  | -3 | -0.03 | 0.48  |
| -  | 15 | 1  | 3     | 0.48  |
| -  | 15 | -1 | 3     | 0.93  |
| 15 | -1 | -3 | 0.43  | 0.45  |
| -  | 15 | 1  | 2     | -0.33 |
| 15 | 1  | -2 | -0.32 | 0.48  |
| 15 | -1 | -2 | -0.21 | 0.46  |
| -  | 15 | -1 | 2     | -0.14 |
| -  | 15 | 1  | 1     | -0.21 |
| 15 | 1  | -1 | -0.21 | 0.49  |
| 15 | -1 | -1 | -0.18 | 0.46  |
| -  | 15 | -1 | 1     | -0.20 |
| -  | 15 | 1  | 0     | -0.21 |
| 15 | 1  | 0  | 0.28  | 0.45  |
| -  | 15 | -1 | 0     | -0.10 |
| 15 | -1 | 0  | 0.08  | 0.47  |
| -  | 15 | 1  | -1    | 0.65  |
| 15 | 1  | 1  | 1.12  | 0.51  |
| 15 | -1 | 1  | 1.01  | 0.49  |
| -  | 15 | -1 | -1    | 0.77  |
| 15 | 2  | -9 | -0.53 | 0.45  |
| 15 | 2  | -8 | -0.73 | 0.46  |
| 15 | 2  | -7 | -0.92 | 0.46  |
| -  | 15 | 2  | 6     | -0.28 |
| 15 | 2  | -6 | -1.09 | 0.47  |
| 15 | -2 | -6 | -0.43 | 0.41  |
| -  | 15 | 2  | 5     | -0.22 |
| 15 | 2  | -5 | -1.14 | 0.48  |
| -  | 15 | -2 | 5     | -0.16 |
| 15 | -2 | -5 | -0.47 | 0.41  |
| 15 | 2  | -4 | -1.04 | 0.48  |
| -  | 15 | 2  | 4     | -0.44 |
| -  | 15 | -2 | 4     | -0.05 |
| 15 | -2 | -4 | -0.35 | 0.44  |
| -  | 15 | 2  | 3     | 0.41  |
| 15 | 2  | -3 | -0.36 | 0.49  |
| 15 | -2 | -3 | 0.33  | 0.45  |
| -  | 15 | -2 | 3     | 0.30  |
| 15 | 2  | -2 | -0.23 | 0.50  |
| -  | 15 | 2  | 2     | -0.11 |
| -  | 15 | -2 | 2     | 0.42  |
| 15 | -2 | -2 | 0.64  | 0.45  |
| -  | 15 | 2  | 1     | -0.12 |
| 15 | 2  | -1 | -0.12 | 0.50  |
| -  | 15 | -2 | 1     | -0.45 |
| 15 | -2 | -1 | 0.20  | 0.46  |
| 15 | 2  | 0  | 0.03  | 0.49  |
| -  | 15 | 2  | 0     | -0.28 |
| 15 | -2 | 0  | -0.04 | 0.46  |
| -  | 15 | -2 | 0     | -0.02 |
| -  | 15 | 2  | -1    | 0.29  |
| 15 | 2  | 1  | 0.47  | 0.50  |

|    |    |    |       |       |
|----|----|----|-------|-------|
| 15 | -2 | 1  | 0.88  | 0.46  |
| -  | 15 | -2 | -1    | 0.31  |
| 15 | 3  | -9 | -0.68 | 0.47  |
| 15 | 3  | -8 | -0.94 | 0.51  |
| 15 | 3  | -7 | -0.86 | 0.48  |
| -  | 15 | 3  | 6     | 0.45  |
| 15 | 3  | -6 | -0.38 | 0.51  |
| 15 | 3  | -5 | -1.24 | 0.50  |
| -  | 15 | 3  | 5     | -0.03 |
| 15 | -3 | -5 | 0.04  | 0.40  |
| -  | 15 | -3 | 5     | 0.08  |
| -  | 15 | 3  | 4     | -0.22 |
| 15 | 3  | -4 | -0.53 | 0.52  |
| 15 | -3 | -4 | 0.11  | 0.43  |
| -  | 15 | -3 | 4     | 0.45  |
| 15 | 3  | -3 | -0.65 | 0.51  |
| -  | 15 | 3  | 3     | -0.33 |
| -  | 15 | -3 | 3     | 0.19  |
| 15 | -3 | -3 | -0.16 | 0.43  |
| 15 | 3  | -2 | -0.59 | 0.51  |
| -  | 15 | 3  | 2     | -0.34 |
| 15 | -3 | -2 | 0.13  | 0.43  |
| -  | 15 | -3 | 2     | -0.03 |
| -  | 15 | 3  | 1     | -0.15 |
| 15 | 3  | -1 | -0.02 | 0.52  |
| -  | 15 | -3 | 1     | 0.35  |
| 15 | -3 | -1 | 0.86  | 0.45  |
| -  | 15 | 3  | 0     | -0.24 |
| 15 | 3  | 0  | -0.31 | 0.51  |
| -  | 15 | -3 | 0     | -0.13 |
| 15 | -3 | 0  | 0.71  | 0.46  |
| 15 | 3  | 1  | -0.30 | 0.50  |
| -  | 15 | 3  | -1    | -0.35 |
| -  | 15 | -3 | -1    | 0.03  |
| 15 | -3 | 1  | 0.49  | 0.46  |
| 15 | 4  | -9 | -0.61 | 0.49  |
| 15 | 4  | -8 | -0.35 | 0.50  |
| 15 | 4  | -7 | -1.31 | 0.49  |
| -  | 15 | 4  | 6     | -0.64 |
| 15 | 4  | -6 | -1.35 | 0.51  |
| -  | 15 | 4  | 5     | -0.25 |
| -  | 15 | 4  | 4     | -0.31 |
| 15 | 4  | -4 | -1.15 | 0.53  |
| 15 | -4 | -4 | -0.05 | 0.40  |
| -  | 15 | -4 | 4     | -0.10 |
| -  | 15 | 4  | 3     | -0.16 |
| 15 | 4  | -3 | -0.95 | 0.53  |
| 15 | -4 | -3 | -0.08 | 0.41  |
| -  | 15 | -4 | 3     | 0.07  |
| -  | 15 | 4  | 2     | -0.28 |
| 15 | 4  | -2 | -0.79 | 0.52  |
| 15 | -4 | -2 | 0.42  | 0.43  |
| -  | 15 | -4 | 2     | -0.33 |
| -  | 15 | 4  | 1     | -0.09 |

|    |    |    |       |       |
|----|----|----|-------|-------|
| 15 | 4  | -1 | -0.78 | 0.52  |
| -  | 15 | -4 | 1     | 0.13  |
| 15 | -4 | -1 | 0.32  | 0.44  |
| -  | 15 | 4  | 0     | 0.01  |
| 15 | 4  | 0  | -0.16 | 0.52  |
| -  | 15 | -4 | 0     | 0.36  |
| 15 | -4 | 0  | 0.44  | 0.44  |
| -  | 15 | 4  | -1    | -0.65 |
| 15 | -4 | 1  | 0.23  | 0.45  |
| -  | 15 | -4 | -1    | 0.19  |
| 15 | 5  | -9 | -1.00 | 0.55  |
| 15 | 5  | -8 | -0.37 | 0.52  |
| -  | 15 | 5  | 7     | 0.76  |
| 15 | 5  | -7 | -0.19 | 0.53  |
| 15 | 5  | -6 | -1.34 | 0.54  |
| -  | 15 | 5  | 6     | 0.01  |
| -  | 15 | 5  | 5     | -0.02 |
| 15 | 5  | -5 | -1.01 | 0.55  |
| 15 | 5  | -4 | -1.02 | 0.50  |
| -  | 15 | 5  | 4     | -0.71 |
| -  | 15 | -5 | 4     | 0.03  |
| 15 | 5  | -3 | -0.64 | 0.55  |
| -  | 15 | 5  | 3     | 0.19  |
| 15 | -5 | -3 | 0.45  | 0.41  |
| -  | 15 | -5 | 3     | 0.80  |
| 15 | 5  | -2 | -1.13 | 0.53  |
| -  | 15 | 5  | 2     | -0.19 |
| 15 | -5 | -2 | 0.31  | 0.42  |
| -  | 15 | -5 | 2     | 0.12  |
| 15 | 5  | -1 | -0.77 | 0.52  |
| -  | 15 | 5  | 1     | -0.21 |
| -  | 15 | -5 | 1     | 0.22  |
| 15 | -5 | -1 | 0.17  | 0.43  |
| 15 | 5  | 0  | 0.36  | 0.49  |
| -  | 15 | 5  | 0     | 0.02  |
| -  | 15 | -5 | 0     | 0.51  |
| 15 | -5 | 0  | 0.84  | 0.43  |
| 15 | -5 | 1  | 0.53  | 0.45  |
| 15 | 6  | -8 | -1.44 | 0.53  |
| -  | 15 | 6  | 7     | -0.71 |
| 15 | 6  | -7 | -1.31 | 0.55  |
| 15 | 6  | -6 | -1.14 | 0.56  |
| -  | 15 | 6  | 6     | -0.41 |
| 15 | 6  | -5 | -1.14 | 0.57  |
| -  | 15 | 6  | 5     | 0.10  |
| 15 | 6  | -4 | -1.43 | 0.56  |
| -  | 15 | 6  | 4     | -0.36 |
| -  | 15 | -6 | 4     | 0.32  |
| -  | 15 | 6  | 3     | -0.17 |
| 15 | 6  | -3 | -1.41 | 0.56  |
| -  | 15 | -6 | 3     | 0.18  |
| -  | 15 | 6  | 2     | -0.38 |
| 15 | 6  | -2 | -0.96 | 0.50  |
| -  | 15 | -6 | 2     | 0.14  |

|    |     |     |       |       |
|----|-----|-----|-------|-------|
| 15 | -6  | -2  | 0.29  | 0.44  |
| -  | 15  | 6   | 1     | 0.32  |
| 15 | 6   | -1  | -0.10 | 0.54  |
| -  | 15  | -6  | 1     | 1.02  |
| 15 | -6  | -1  | 1.36  | 0.43  |
| -  | 15  | 6   | 0     | -0.56 |
| 15 | 6   | 0   | -0.52 | 0.53  |
| -  | 15  | -6  | 0     | 0.41  |
| 15 | -6  | 0   | 0.60  | 0.43  |
| 15 | -6  | 1   | 0.75  | 0.46  |
| -  | 15  | 7   | 7     | -0.51 |
| 15 | 7   | -7  | -1.30 | 0.59  |
| -  | 15  | 7   | 6     | -0.66 |
| 15 | 7   | -5  | -1.61 | 0.59  |
| -  | 15  | 7   | 5     | -0.94 |
| -  | 15  | 7   | 4     | -0.32 |
| 15 | 7   | -4  | -1.34 | 0.59  |
| 15 | 7   | -3  | -0.96 | 0.54  |
| -  | 15  | 7   | 3     | -0.26 |
| -  | 15  | -7  | 3     | 0.21  |
| 15 | 7   | -2  | -1.23 | 0.58  |
| -  | 15  | 7   | 2     | 0.04  |
| -  | 15  | -7  | 2     | 0.18  |
| 15 | 7   | -1  | -0.73 | 0.51  |
| -  | 15  | 7   | 1     | -0.24 |
| -  | 15  | -7  | 1     | 0.51  |
| 15 | -7  | -1  | 0.73  | 0.43  |
| -  | 15  | -7  | 0     | 0.66  |
| 15 | -7  | 0   | 0.37  | 0.43  |
| 15 | -8  | -8  | 0.50  | 0.38  |
| -  | 15  | 8   | 7     | -0.48 |
| -  | 15  | 8   | 6     | -0.59 |
| -  | 15  | 8   | 5     | -0.77 |
| -  | 15  | 8   | 4     | -0.62 |
| -  | 15  | 8   | 3     | -0.19 |
| -  | 15  | -8  | 3     | 0.05  |
| -  | 15  | 8   | 2     | 0.25  |
| -  | 15  | -8  | 2     | 0.78  |
| -  | 15  | -8  | 1     | 0.30  |
| 15 | -8  | 0   | 0.41  | 0.43  |
| -  | 15  | 9   | 7     | -0.81 |
| 15 | -9  | -7  | 0.22  | 0.37  |
| -  | 15  | 9   | 6     | -0.50 |
| 15 | -9  | -6  | 0.87  | 0.36  |
| -  | 15  | 9   | 5     | -0.72 |
| 15 | -9  | -5  | 0.82  | 0.35  |
| -  | 15  | 9   | 4     | -0.73 |
| -  | 15  | -9  | 3     | 0.27  |
| -  | 15  | -9  | 2     | 0.11  |
| 15 | -10 | -5  | 0.28  | 0.35  |
| 15 | -10 | -4  | 0.13  | 0.34  |
| -  | 15  | -10 | 2     | 0.22  |
| 16 | 0   | -7  | -0.71 | 0.47  |
| 16 | 0   | -6  | -0.88 | 0.50  |

|    |    |    |       |       |
|----|----|----|-------|-------|
| 16 | 0  | -5 | -0.89 | 0.48  |
| -  | 16 | 0  | 5     | -0.17 |
| 16 | 0  | -4 | -0.14 | 0.48  |
| -  | 16 | 0  | 4     | -0.19 |
| -  | 16 | 0  | 3     | -0.10 |
| 16 | 0  | -3 | -0.54 | 0.49  |
| 16 | 0  | -2 | -0.23 | 0.51  |
| -  | 16 | 0  | 2     | 0.01  |
| 16 | 1  | -7 | -0.94 | 0.51  |
| 16 | 1  | -6 | -0.75 | 0.49  |
| 16 | -1 | -6 | -0.70 | 0.45  |
| -  | 16 | 1  | 5     | -0.19 |
| 16 | 1  | -5 | -1.20 | 0.50  |
| -  | 16 | -1 | 5     | -0.23 |
| 16 | -1 | -5 | -0.61 | 0.46  |
| -  | 16 | 1  | 4     | 0.12  |
| 16 | 1  | -4 | -0.05 | 0.51  |
| -  | 16 | -1 | 4     | 0.35  |
| 16 | -1 | -4 | 0.31  | 0.47  |
| -  | 16 | 1  | 3     | -0.13 |
| 16 | 1  | -3 | 0.24  | 0.51  |
| -  | 16 | -1 | 3     | 0.66  |
| 16 | -1 | -3 | 0.44  | 0.48  |
| 16 | 1  | -2 | 0.20  | 0.53  |
| -  | 16 | 1  | 2     | -0.15 |
| -  | 16 | -1 | 2     | 0.34  |
| 16 | -1 | -2 | 0.13  | 0.50  |
| 16 | 2  | -8 | -1.24 | 0.53  |
| 16 | 2  | -7 | -1.20 | 0.50  |
| 16 | 2  | -6 | -1.46 | 0.54  |
| -  | 16 | 2  | 6     | -0.38 |
| -  | 16 | 2  | 5     | 0.15  |
| 16 | 2  | -5 | -0.42 | 0.53  |
| -  | 16 | -2 | 5     | 0.20  |
| 16 | -2 | -5 | -0.15 | 0.45  |
| 16 | 2  | -4 | -0.57 | 0.53  |
| -  | 16 | 2  | 4     | -0.37 |
| -  | 16 | -2 | 4     | 0.35  |
| 16 | -2 | -4 | 0.15  | 0.45  |
| -  | 16 | 2  | 3     | -0.18 |
| 16 | 2  | -3 | -0.64 | 0.53  |
| -  | 16 | -2 | 3     | -0.09 |
| 16 | -2 | -3 | -0.31 | 0.49  |
| 16 | 2  | -2 | -0.68 | 0.52  |
| -  | 16 | 2  | 2     | -0.22 |
| -  | 16 | -2 | 2     | 0.23  |
| 16 | -2 | -2 | 0.29  | 0.48  |
| 16 | -2 | -1 | 0.33  | 0.49  |
| 16 | 3  | -7 | -1.09 | 0.52  |
| -  | 16 | 3  | 6     | -0.18 |
| 16 | 3  | -6 | -1.33 | 0.53  |
| -  | 16 | 3  | 5     | -0.15 |
| 16 | 3  | -5 | -0.98 | 0.54  |
| -  | 16 | 3  | 4     | -0.20 |

|    |    |    |       |       |
|----|----|----|-------|-------|
| 16 | 3  | -4 | -0.86 | 0.55  |
| -  | 16 | -3 | 4     | -0.06 |
| 16 | -3 | -4 | 0.16  | 0.46  |
| 16 | 3  | -3 | -1.29 | 0.54  |
| -  | 16 | 3  | 3     | -0.25 |
| 16 | -3 | -3 | 0.30  | 0.49  |
| -  | 16 | -3 | 3     | 0.03  |
| -  | 16 | -3 | 2     | 0.23  |
| 16 | -3 | -2 | 0.01  | 0.47  |
| 16 | -3 | -1 | -0.10 | 0.48  |
| -  | 16 | 4  | 6     | -0.03 |
| 16 | 4  | -5 | -0.99 | 0.56  |
| -  | 16 | 4  | 5     | -0.01 |
| -  | 16 | 4  | 4     | -0.32 |
| -  | 16 | -4 | 4     | 0.18  |
| -  | 16 | 4  | 3     | 0.07  |
| -  | 16 | -4 | 3     | 0.68  |
| 16 | -4 | -3 | 0.10  | 0.44  |
| 16 | -4 | -2 | 0.20  | 0.46  |
| -  | 16 | -4 | 2     | -0.09 |
| -  | 16 | 5  | 6     | -0.09 |
| -  | 16 | 5  | 5     | -0.19 |
| -  | 16 | 5  | 4     | -0.52 |
| -  | 16 | -5 | 4     | 0.23  |
| -  | 16 | -5 | 3     | 0.56  |
| -  | 16 | -5 | 2     | 0.33  |
| 16 | -5 | -2 | 0.56  | 0.44  |
| -  | 16 | -6 | 3     | 0.53  |
| -  | 16 | -7 | 3     | 1.36  |
| 0  | 0  | 0  | 0.00  | 0.00  |

;

\_shelx\_hkl\_checksum      7511
