# Supplementary material
Source: MDPI journal article supplement (https://www.mdpi.com/2073-4352/13/8/1254)
Supplement: s1 [file s1 › Supporting Information.pdf]

## **Supporting Information**

### **Synthesis, Crystal Structure, and Anti-fungal Activity of Quinazolinone Derivatives**

Rong Zeng <sup>1</sup>, Cong Huang <sup>1</sup>, Jie Wang <sup>2</sup>, Yuan Zhong <sup>1</sup>, QingWen Fang <sup>1</sup>, ShuZhen Xiao <sup>2</sup>, XuLiang Nie <sup>2</sup>, ShangXing Chen <sup>1,\*</sup>, DaYong Peng <sup>2,\*</sup>.

<sup>1</sup>College of Forestry, East China Woody Fragrance and Flavor Engineering Research Center of National Forestry and Grassland Administration, Jiangxi Agricultural University, Nanchang 330045, China.

<sup>2</sup> College of Chemistry and Materials, Key Laboratory of Chemical Utilization of Plant Resources of Nanchang, East China Woody Fragrance and Flavor Engineering Research Center of National Forestry and Grassland Administration, Jiangxi Agricultural University, Nanchang 330045, China

\* Correspondence: csxing@126.com (S.-X.C.); dayongpeng@163.com (D.-Y.P.)

|                                      |   |
|--------------------------------------|---|
| 1. Spectrums of compounds 2a~2d..... | 3 |
|--------------------------------------|---|

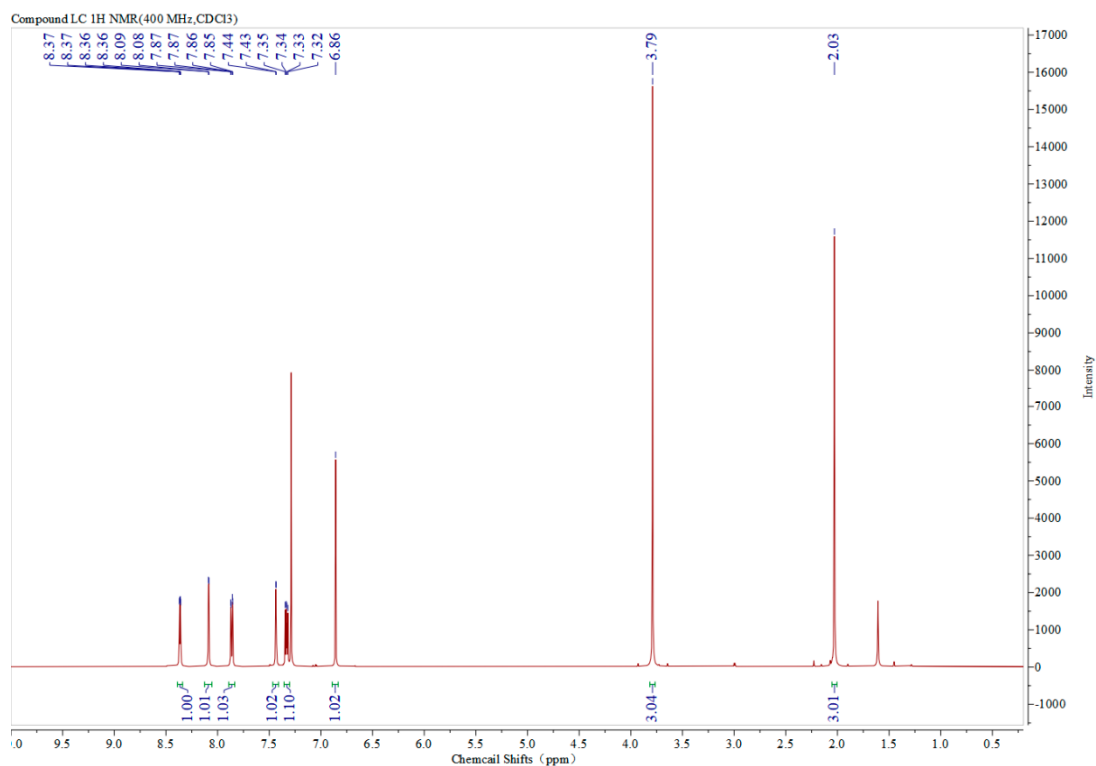

Figure. S1 The  $^1\text{H}$  NMR spectra Compound 2a

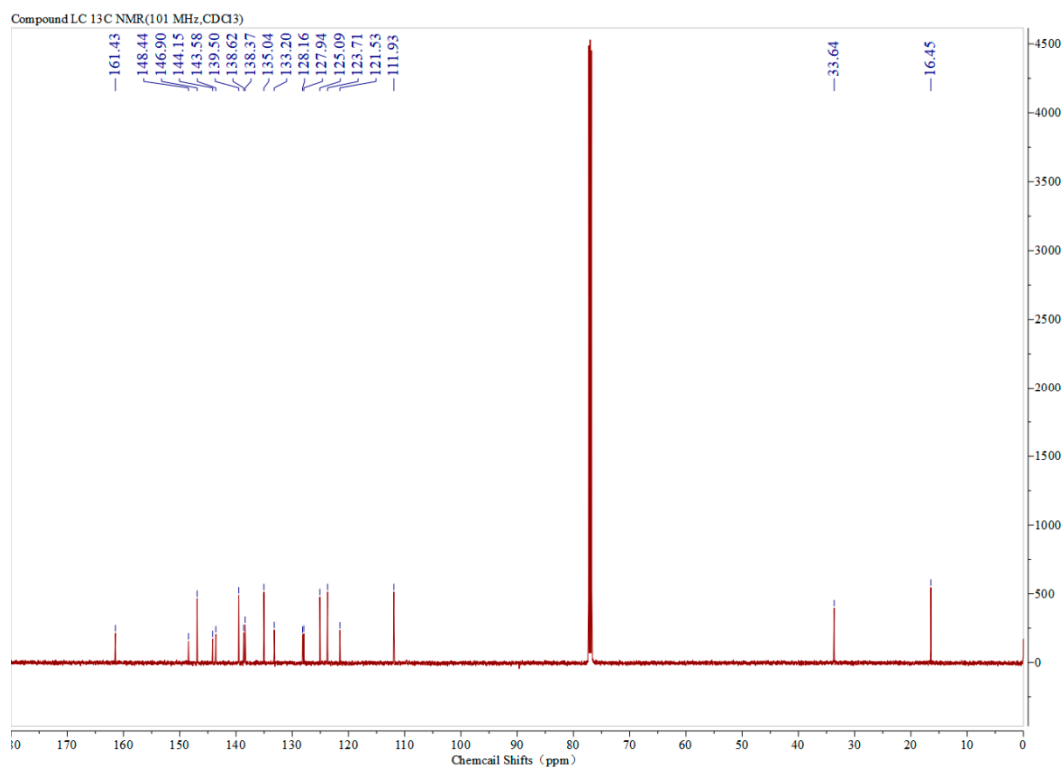

Figure. S2 The  $^{13}\text{C}$  NMR spectra of Compound 2a

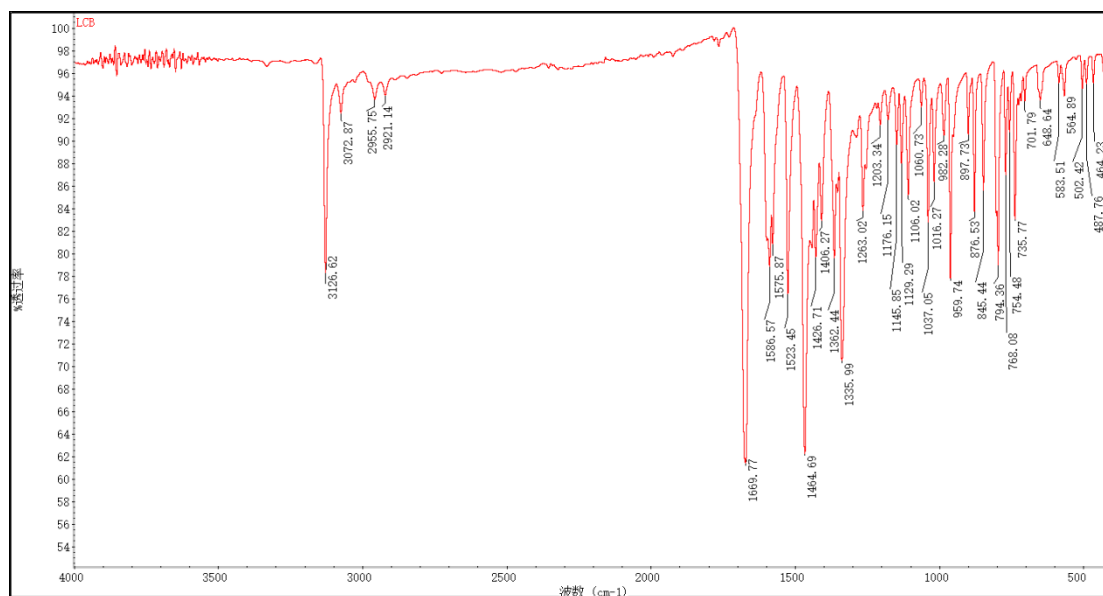

**Figure. S3 The FT-IR spectra of Compound 2a**

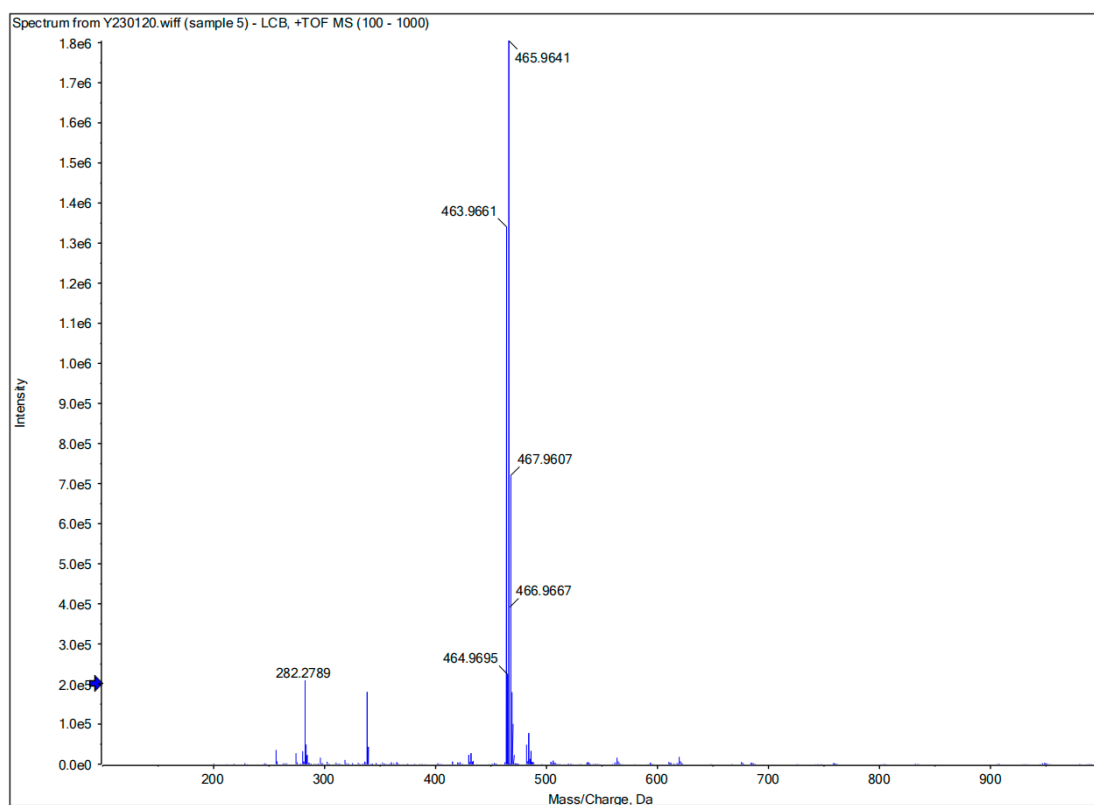

**Figure. S4 The HRMS spectra of Compound 2a**

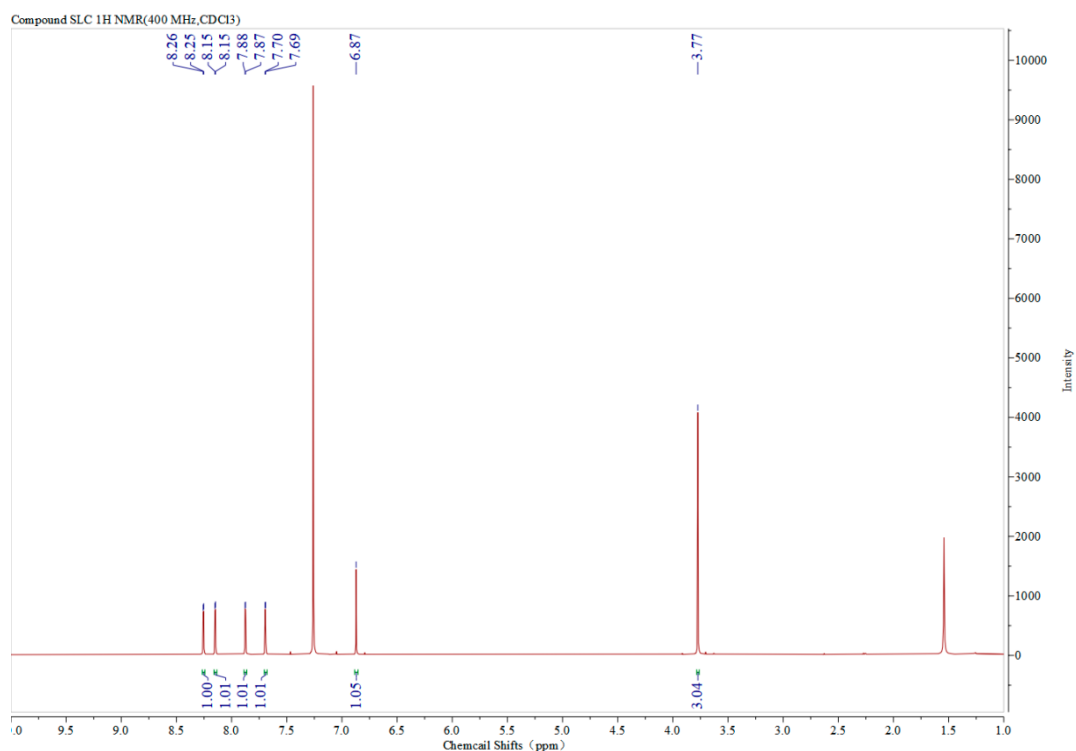

**Figure. S5 The  $^1\text{H}$  NMR spectra Compound 2b**

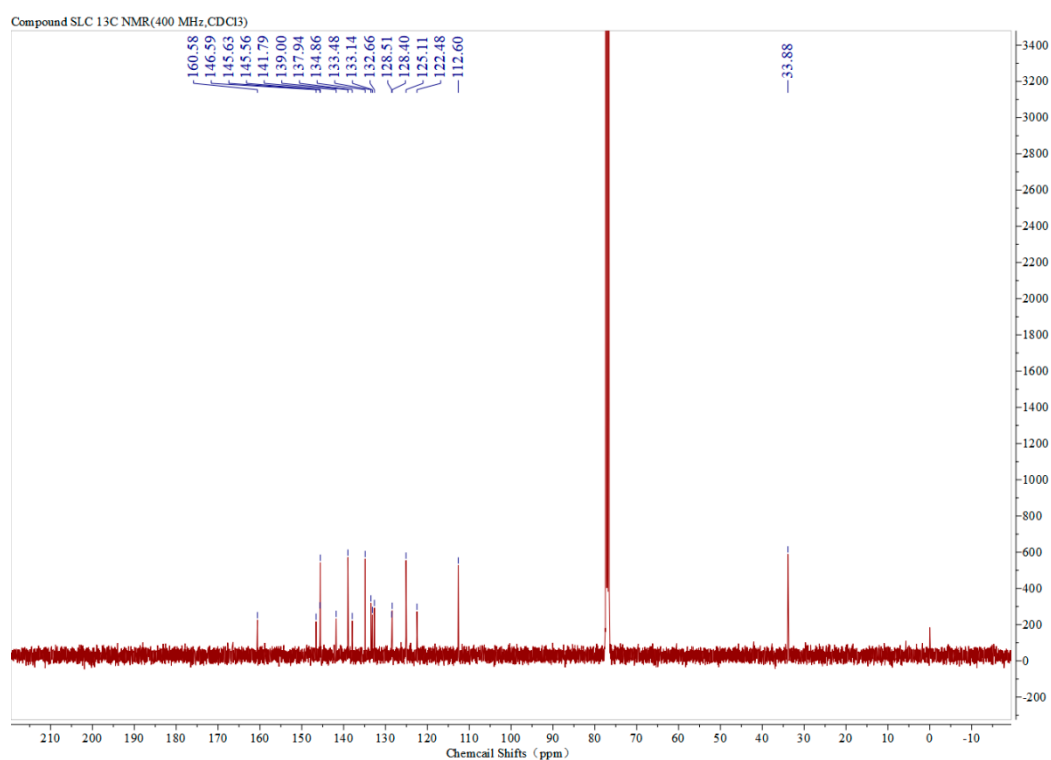

**Figure. S6 The  $^{13}\text{C}$  NMR spectra of Compound 2b**

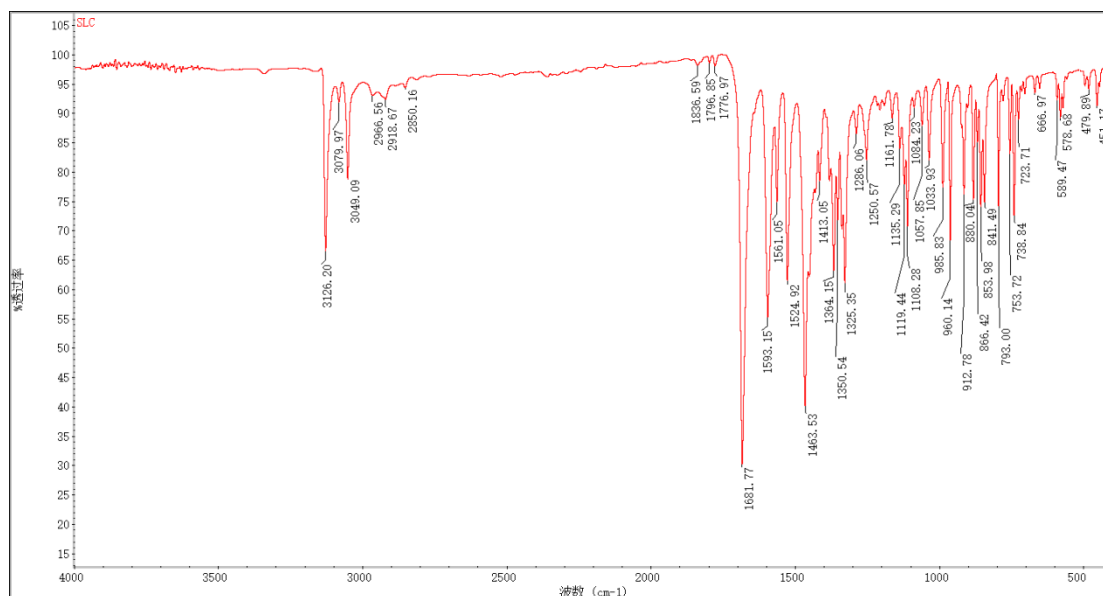

**Figure. S7 The FT-IR spectra of Compound 2b**

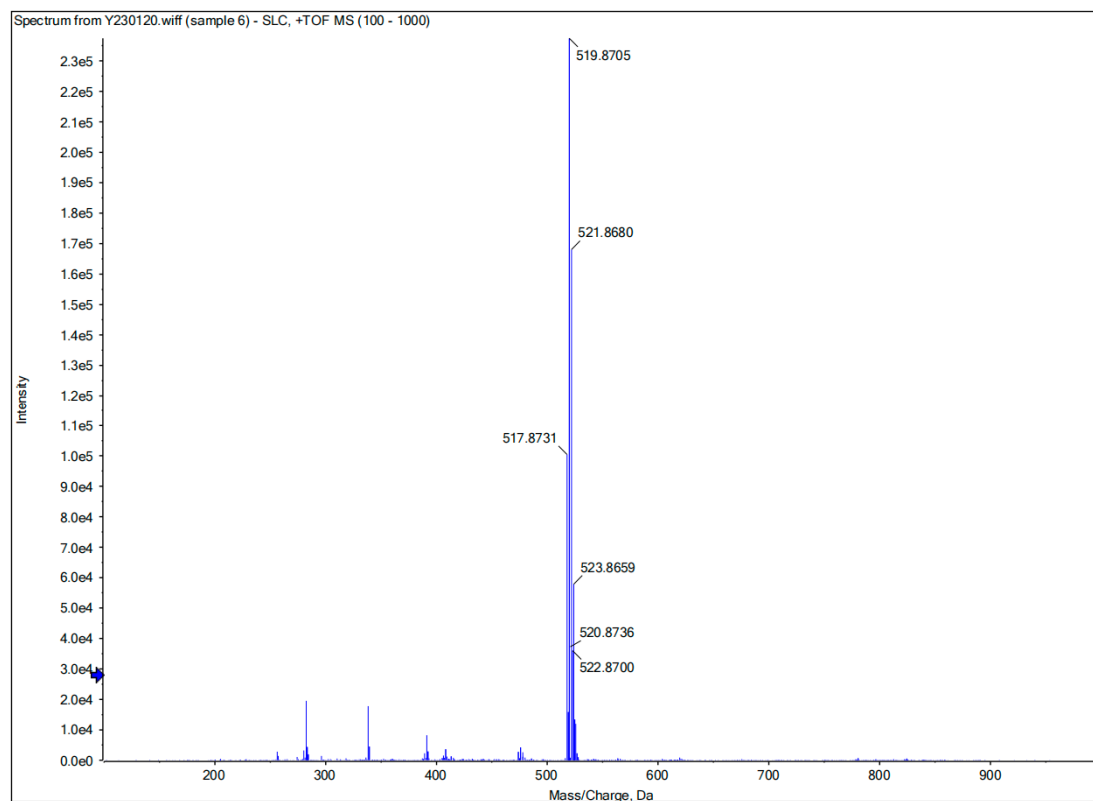

**Figure. S8 The HRMS spectra of Compound 2b**

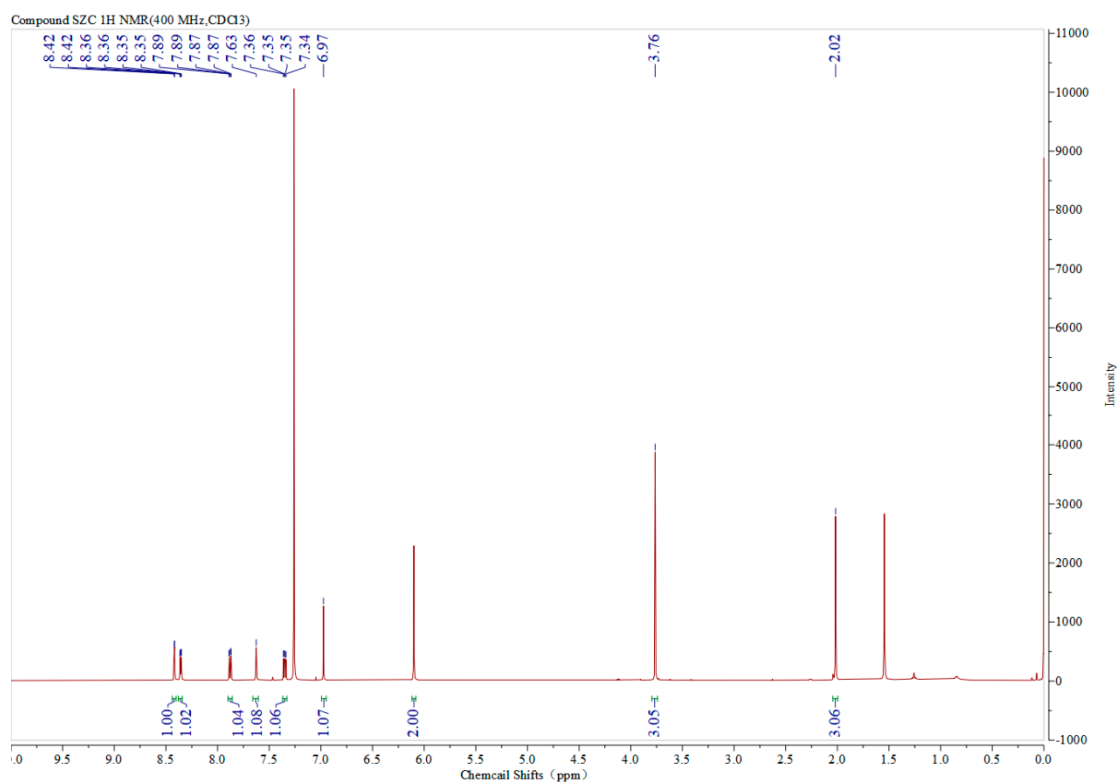

Figure. S9 The  $^1\text{H}$  NMR spectra Compound 2c

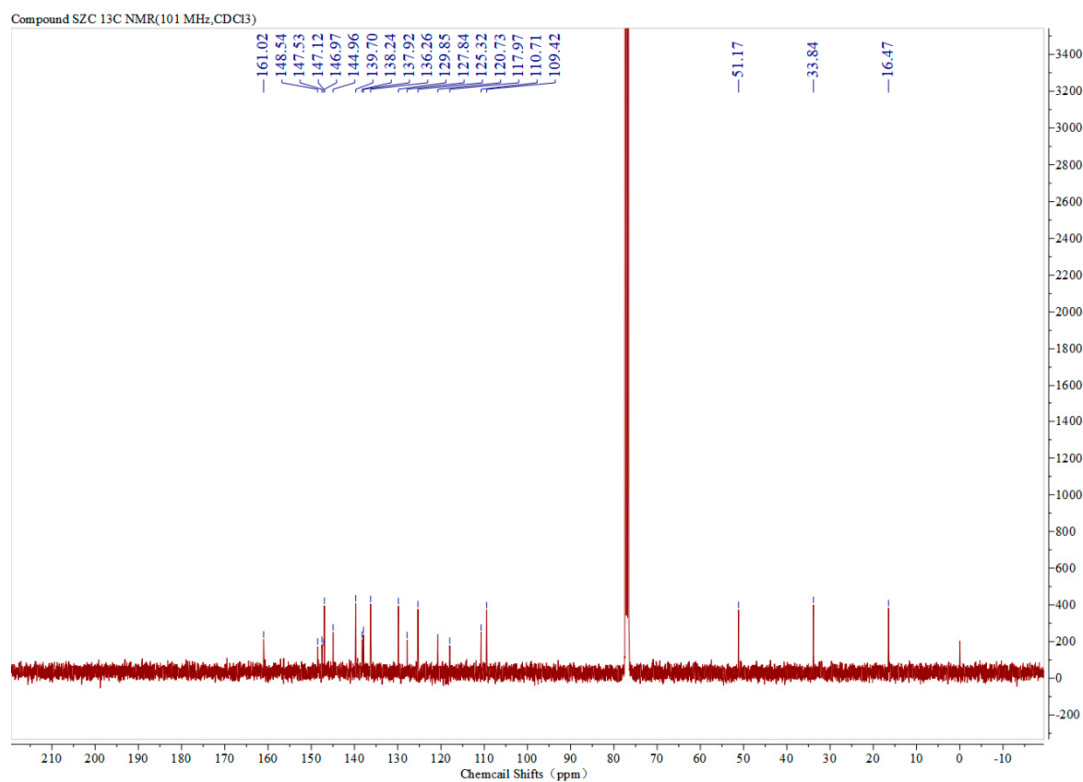

Figure. S10 The  $^{13}\text{C}$  NMR spectra of Compound 2c

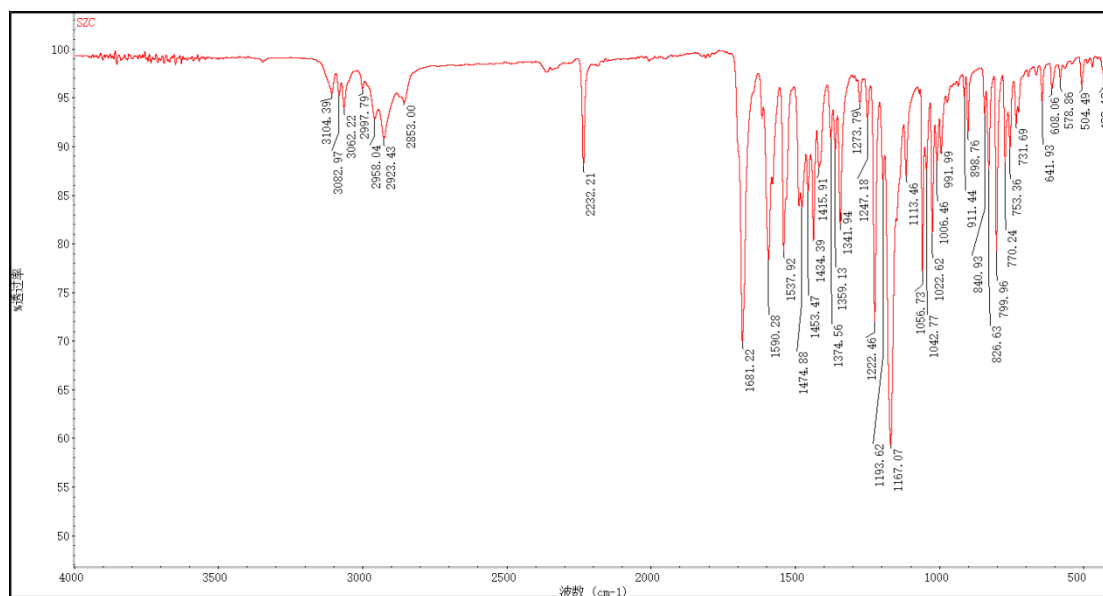

**Figure. S11 The FT-IR spectra of Compound 2c**

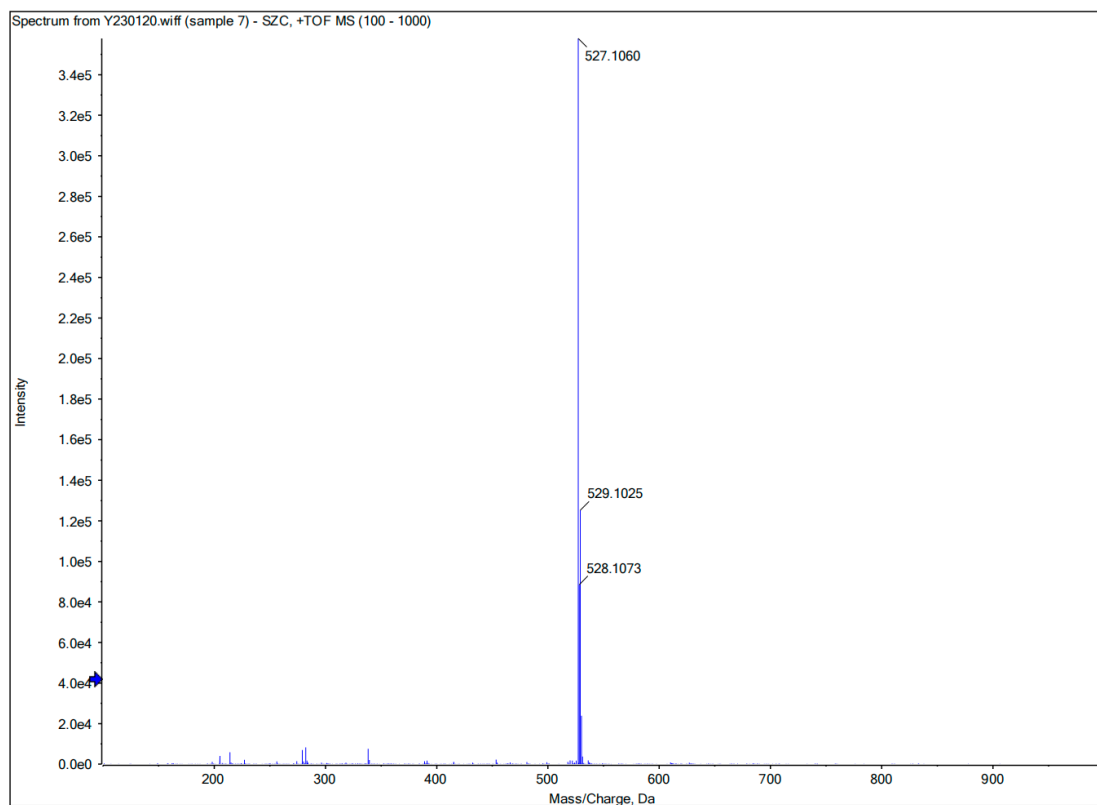

**Figure. S12 The HRMS spectra of Compound 2c**

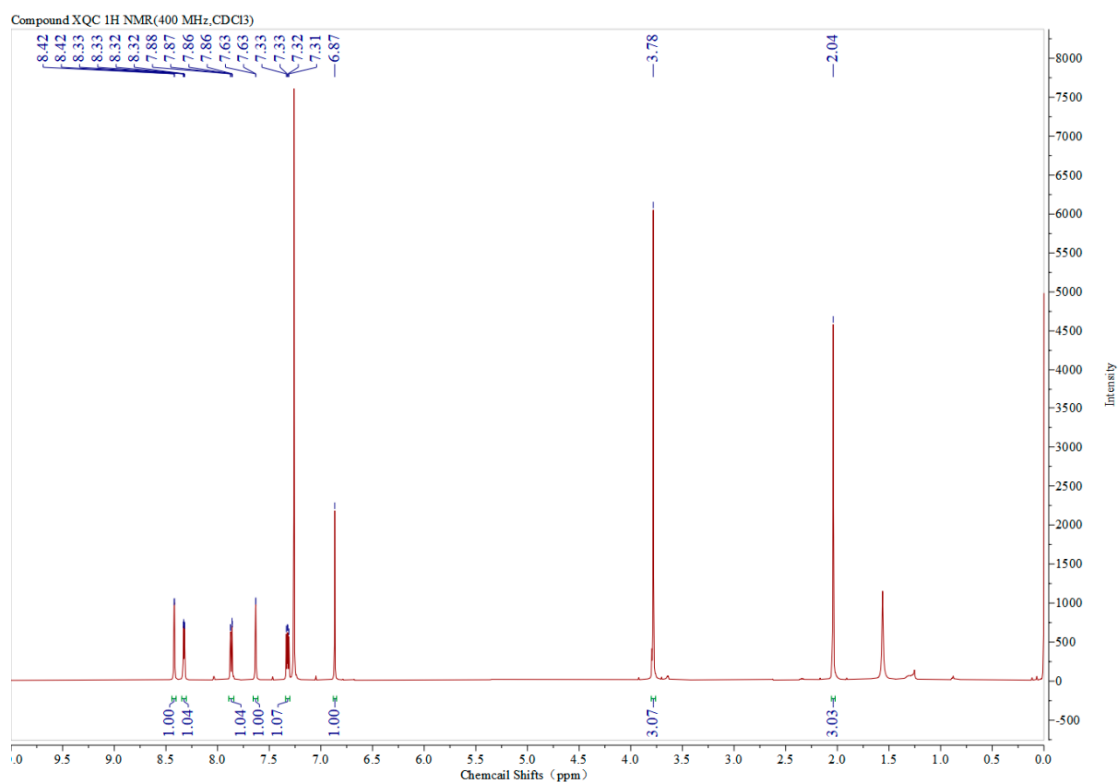

Figure. S13 The  $^1\text{H}$  NMR spectra Compound 2d

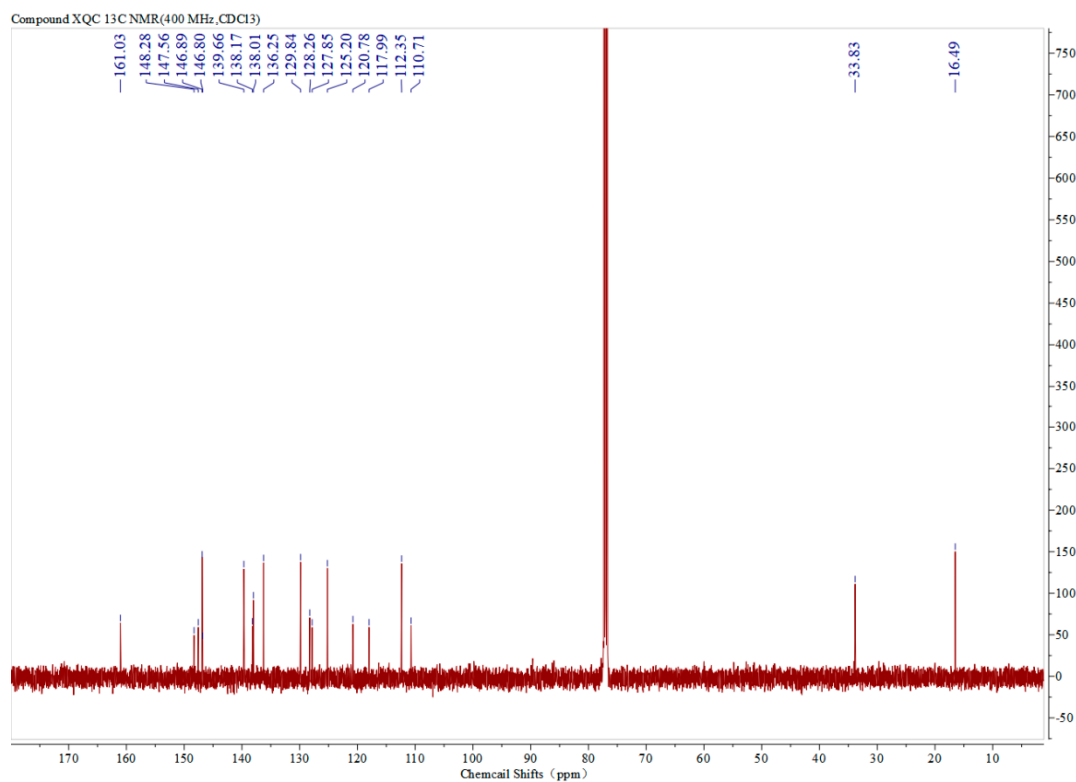

Figure. S14 The  $^{13}\text{C}$  NMR spectra of Compound 2d

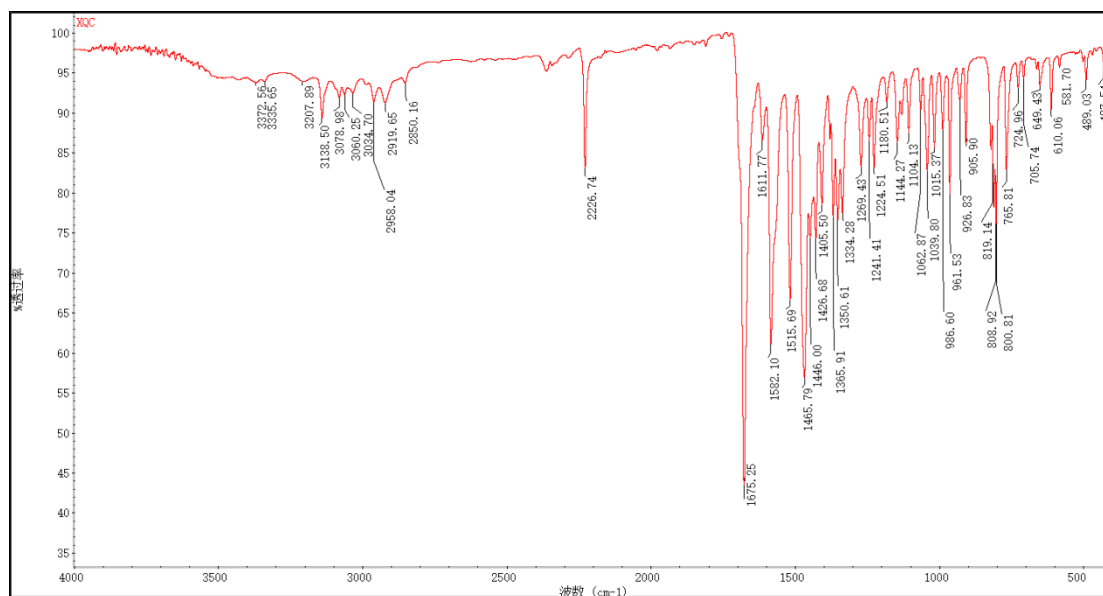

Figure. S15 The FT-IR spectra of Compound 2d

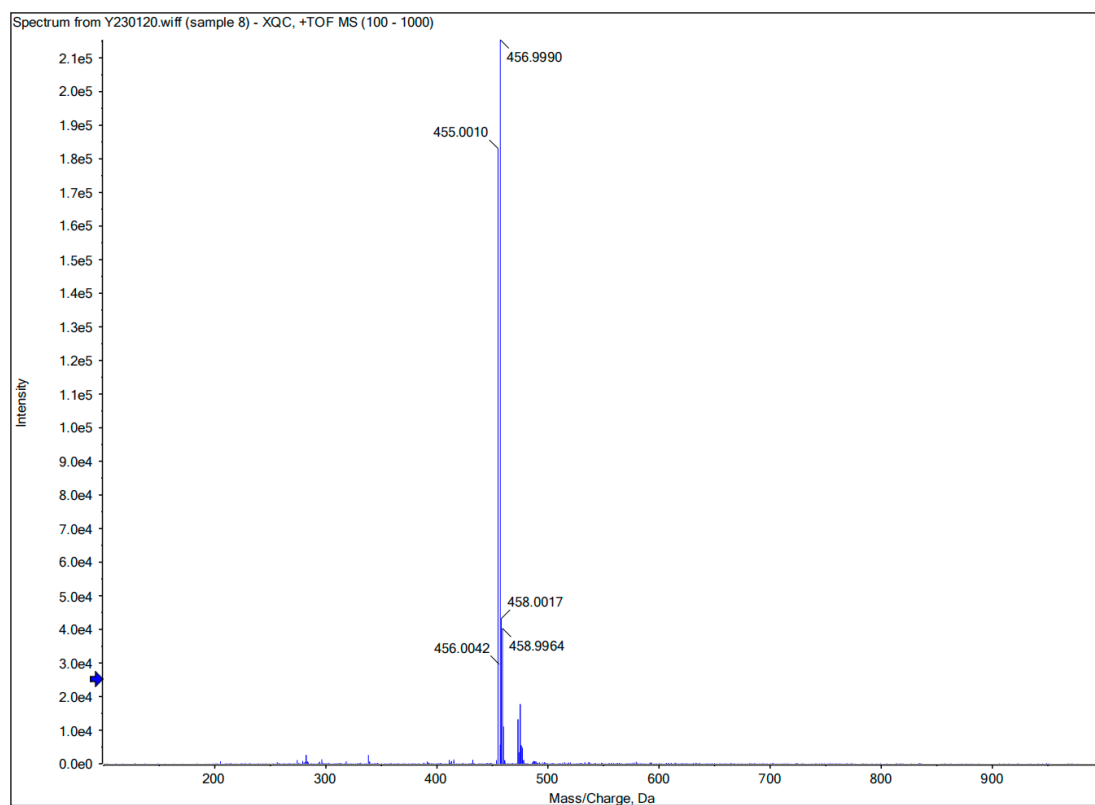

Figure. S16 The HRMS spectra of Compound 2d
